# Supplementary material for: Deciphering viral presences: two novel partial giant viruses detected in marine metagenome and in a mine drainage metagenome
Source: PubMed Central journal article supplement (PMC5891951; doi:10.1186/s12985-018-0976-9), 2018-04-10
Supplement: 12985_2018_976_MOESM6_ESM.pdf [file 12985_2018_976_MOESM6_ESM.pdf]

Reference sequence (1): Pithovirus\_massiliensis\_LC8
Identities normalised by aligned length.
Colored by: identity + property

Table with 3 columns: Accession, Identity, and Sequence. Row 1: Pithovirus\_massiliensis\_LC8 (100.0%). Row 2: Armadillidium\_vulgare\_iridescent\_virus\_YP\_009046748.1 (17.6%). Row 3: Cedratvirus\_All\_YP\_009329068.1 (45.2%). Row 4: Cedratvirus\_lausanensis\_S0B74375.1 (45.5%). Row 5: Cherax\_quadricarinatus\_iridovirus\_ASZ84981.1 (16.7%). Row 6: Invertebrate\_iridescent\_virus\_30\_YP\_009010370.1 (14.8%). Row 7: Invertebrate\_iridovirus\_22\_YP\_008357369.1 (14.8%). Row 8: Invertebrate\_iridovirus\_25\_YP\_009010611.1 (15.6%). Row 9: Orpheovirus\_IHUMI-LCC2\_YP\_009449240.1 (14.4%). Row 10: Melbournevirus\_YP\_009094806.1 (14.9%). Row 11: Marseillevirus\_marseillevirus\_YP\_003407071.1 (14.9%). Row 12: Brazilian\_marseillevirus\_YP\_009238902.1 (14.9%). Row 13: Golden\_marseillevirus\_YP\_009310340.1 (12.3%). Row 14: mine\_drainage\_metagenome\_EQD26795.1 (21.6%). Row 15: Pithovirus\_sibericum\_YP\_009001361.1 (95.1%). Row 16: Shrimp\_hemocyte\_iridescent\_virus\_ATE87157.1 (16.7%). Row 17: Wiseana\_iridescent\_virus\_YP\_004732793.1 (15.0%). Row 18: PCJ29163.1\_COA94\_02315\_Rickettsiales (22.3%). Consensus: 100%, 90%, 80%, 70%.

Table with 3 columns: Accession, Identity, and Sequence. Row 1: Pithovirus\_massiliensis\_LC8 (100.0%). Row 2: Armadillidium\_vulgare\_iridescent\_virus\_YP\_009046748.1 (17.6%). Row 3: Cedratvirus\_All\_YP\_009329068.1 (45.2%). Row 4: Cedratvirus\_lausanensis\_S0B74375.1 (45.5%). Row 5: Cherax\_quadricarinatus\_iridovirus\_ASZ84981.1 (16.7%). Row 6: Invertebrate\_iridescent\_virus\_30\_YP\_009010370.1 (14.8%). Row 7: Invertebrate\_iridovirus\_22\_YP\_008357369.1 (14.8%). Row 8: Invertebrate\_iridovirus\_25\_YP\_009010611.1 (15.6%). Row 9: Orpheovirus\_IHUMI-LCC2\_YP\_009449240.1 (14.4%). Row 10: Melbournevirus\_YP\_009094806.1 (14.9%). Row 11: Marseillevirus\_marseillevirus\_YP\_003407071.1 (14.9%). Row 12: Brazilian\_marseillevirus\_YP\_009238902.1 (14.9%). Row 13: Golden\_marseillevirus\_YP\_009310340.1 (12.3%). Row 14: mine\_drainage\_metagenome\_EQD26795.1 (21.6%). Row 15: Pithovirus\_sibericum\_YP\_009001361.1 (95.1%). Row 16: Shrimp\_hemocyte\_iridescent\_virus\_ATE87157.1 (16.7%). Row 17: Wiseana\_iridescent\_virus\_YP\_004732793.1 (15.0%). Row 18: PCJ29163.1\_COA94\_02315\_Rickettsiales (22.3%). Consensus: 100%, 90%, 80%, 70%.

Table with 3 columns: Accession, Identity, and Sequence. Row 1: Pithovirus\_massiliensis\_LC8 (100.0%). Row 2: Armadillidium\_vulgare\_iridescent\_virus\_YP\_009046748.1 (17.6%). Row 3: Cedratvirus\_All\_YP\_009329068.1 (45.2%). Row 4: Cedratvirus\_lausanensis\_S0B74375.1 (45.5%). Row 5: Cherax\_quadricarinatus\_iridovirus\_ASZ84981.1 (16.7%). Row 6: Invertebrate\_iridescent\_virus\_30\_YP\_009010370.1 (14.8%). Row 7: Invertebrate\_iridovirus\_22\_YP\_008357369.1 (14.8%). Row 8: Invertebrate\_iridovirus\_25\_YP\_009010611.1 (15.6%). Row 9: Orpheovirus\_IHUMI-LCC2\_YP\_009449240.1 (14.4%). Row 10: Melbournevirus\_YP\_009094806.1 (14.9%). Row 11: Marseillevirus\_marseillevirus\_YP\_003407071.1 (14.9%). Row 12: Brazilian\_marseillevirus\_YP\_009238902.1 (14.9%). Row 13: Golden\_marseillevirus\_YP\_009310340.1 (12.3%). Row 14: mine\_drainage\_metagenome\_EQD26795.1 (21.6%). Row 15: Pithovirus\_sibericum\_YP\_009001361.1 (95.1%). Row 16: Shrimp\_hemocyte\_iridescent\_virus\_ATE87157.1 (16.7%). Row 17: Wiseana\_iridescent\_virus\_YP\_004732793.1 (15.0%). Row 18: PCJ29163.1\_COA94\_02315\_Rickettsiales (22.3%). Consensus: 100%, 90%, 80%, 70%.

Table with 3 columns: Accession, Identity, and Sequence. Row 1: Pithovirus\_massiliensis\_LC8 (100.0%). Row 2: Armadillidium\_vulgare\_iridescent\_virus\_YP\_009046748.1 (17.6%). Row 3: Cedratvirus\_All\_YP\_009329068.1 (45.2%). Row 4: Cedratvirus\_lausanensis\_S0B74375.1 (45.5%). Row 5: Cherax\_quadricarinatus\_iridovirus\_ASZ84981.1 (16.7%). Row 6: Invertebrate\_iridescent\_virus\_30\_YP\_009010370.1 (14.8%). Row 7: Invertebrate\_iridovirus\_22\_YP\_008357369.1 (14.8%). Row 8: Invertebrate\_iridovirus\_25\_YP\_009010611.1 (15.6%). Row 9: Orpheovirus\_IHUMI-LCC2\_YP\_009449240.1 (14.4%). Row 10: Melbournevirus\_YP\_009094806.1 (14.9%). Row 11: Marseillevirus\_marseillevirus\_YP\_003407071.1 (14.9%). Row 12: Brazilian\_marseillevirus\_YP\_009238902.1 (14.9%). Row 13: Golden\_marseillevirus\_YP\_009310340.1 (12.3%). Row 14: mine\_drainage\_metagenome\_EQD26795.1 (21.6%). Consensus: 100%, 90%, 80%, 70%.

15 Pithovirus\_sibericum\_YP\_009001361.1 95.1%  
 16 Shrimp\_hemocyte\_iridescent\_virus\_ATE87157.1 16.7%  
 17 Wiseana\_iridescent\_virus\_YP\_004732793.1 15.0%  
 18 PCJ29163\_1\_COA94\_02315\_Rickettsiales 22.3%  
 consensus/100%  
 consensus/90%  
 consensus/80%  
 consensus/70%

KE---SVQFEYTFKKSIFDLRFKIRAE-GEDW-EEVPFHKNFIEFVSA--DGGILSPPTIMEGYSKITIEEEQ-AIKN  
 KWNKLRIDFEFRNWTELLILENVGAHN-GEKNPKVPOVGSDDIA-----VAPLSNVQVWVNGGLIPEAERA-RMGC  
 PYNEHQINFNFRDWTETLLVLQNSALVAP-ASPY-VPIV-VPHTLT-----VAPVLGVPQVWANYAIVSNEERR-RMGC  
 KD---SVKFEFKFNLNFSLLIRMRKIGE-NGNWECEIKYDSKYLKGIN----DKQRIPSPQMFAYLIMLESERKWLSE  
 .....ph.h.hp...ph..L.p.t.h.....t..l.s.hhshp.h...t....htt  
 .....pl.php.ppl..L.p.thh...s.....t..l.s.hhshphshl..tEc..thtt  
 .....plpaphp.hpllh.L.p.thht...h...hs.h...t.....stsslsst.hhspYuhl.ppEc..phtp  
 ..pp.pIppa+phpphlsL.phtlhss ss.a.s.l.s.sthphs.....susslssspshpYuhlpp-E+h +hup

321

1 Pithovirus\_massiliensis\_LC8 100.0%  
 2 Armadillidium\_vulgare\_iridescent\_virus\_YP\_009046748.1 17.6%  
 3 Cedratvirus\_All\_YP\_009329068.1 45.2%  
 4 Cedratvirus\_lausannensis\_S0B74375.1 45.5%  
 5 Cherax\_quadricarinatus\_iridovirus\_ASZ84981.1 16.7%  
 6 Invertebrate\_iridescent\_virus\_30\_YP\_009010370.1 14.8%  
 7 Invertebrate\_iridovirus\_22\_YP\_008357369.1 14.8%  
 8 Invertebrate\_iridovirus\_25\_YP\_009010611.1 15.6%  
 9 Orpheovirus\_IHUMI-LCC2\_YP\_009449240.1 14.4%  
 10 Melbournevirus\_YP\_009094806.1 14.9%  
 11 Marseillevirus\_marseillevirus\_YP\_003407071.1 14.9%  
 12 Brazilian\_marseillevirus\_YP\_009238902.1 12.3%  
 13 Golden\_marseillevirus\_YP\_009310340.1 21.6%  
 14 mine\_drainage\_metagenome\_EQD26795.1 95.1%  
 15 Pithovirus\_sibericum\_YP\_009001361.1 16.7%  
 16 Shrimp\_hemocyte\_iridescent\_virus\_ATE87157.1 15.0%  
 17 Wiseana\_iridescent\_virus\_YP\_004732793.1 22.3%  
 18 PCJ29163\_1\_COA94\_02315\_Rickettsiales  
 consensus/100%  
 consensus/90%  
 consensus/80%  
 consensus/70%

NDKH-----CAVEDILTfKTELVD--KVTPLAQVQIKTKYPLKGLFYVAENVDAATRLN-----NFSNFSTCS  
 SVRD-----ILIEQVQTAPRHVYN-PNTNDEPSYDIRFSAHAIKALFFAVRN--TTFKN-----VMSNYTTAS  
 DMDH-----YVVEDIKRFSSEIVN--KTNPKVTIEVDIEDSIKGLFYVAENLDATLTN-----NLSNFSTNA  
 DMDH-----YVVEDIKRFSSEIVN--KTNPKVTIEVDIEDSIKGLFYVAENLDATLTN-----NLSNFSTNA  
 VHRD-----MLIESIQTSKLNFN-PVLNPNPSYDIRFQRTVKALFFGVNRN--TTNPN-----VMSNYTTAS  
 AIRD-----ILIEQVQTAPRQNYT-PLTNASPTFDIRFSAHAIKALFFAVRN--KTGAS-----EWSNYATSS  
 AIRD-----ILIEQVQTAPRQNYT-PLTNASPTFDIRFSAHAIKALFFAVRN--KTGAS-----EWSNYATSS  
 AIRD-----ILIEQVQTAPRQNYT-PLTNASPTFDIRFSAHAIKALFFAVRN--KTSAS-----EWSNYATSS  
 GVLV-----QYIREVINLDRDETA--RLGTVKIPINKPGLSQAIFVSAENNLKPTSKDTSLVPLNYSNYTTNI  
 NPRD-----MVIZKQVQVNETTINLSQLNALVPIIDIRVSHAVVGYFYAIRN--SSTTG-----EWSNYTT--  
 NPRD-----MVIZKQVQVNETTINLSQLNALVPIIDIRVSHAVVGYFYAIRN--SSTTG-----EWSNYTT--  
 NPRD-----MVIZKQVQVNETTINLSQLNALVPIIDIRVSHAVVGYFYAIRN--SSTPG-----EWSNYTT--  
 NPRD-----MVIZKQVQVNETTINLSQLNALVPIIDIRVSHAVVGYFYAIRN--SSTPG-----EWSNYTT--  
 FKIDKEGKYKDEVLFRIRVIAICDDINPS--KFGSYSSIDLTTSNPCLAI FWSAENNTAKSYN-----YHNSNYTTAE  
 NDKH-----CAVEDILTfKTELVD--KVTPLAQVQIKTKYPLKGLFYVAENVDAATRLN-----NFSNFSTCA  
 VHRD-----MLIESIQTSKLNFN-PVLNPNPSYDIRFQRTVKALFFGVNRN--KTGAS-----EWSNYATSS  
 AIRD-----ILIEQVQTAPRQNYT-PLTNASPTFDIRFSAHAIKALFFAVRN--KTSAS-----EWSNYATSS  
 SSHK-----IYARDMVRVSSMVVR--EGGDRVDININCSPNITHIYVTAENMEQNKLN-----NLSNYTTSG  
 .....hhcph.t.p...t...hss...h.lph...thahs.ps...p.....hp.atp..  
 s.c.c hhlCpl.p..p..hs...hss...hplphp.shhuhFashpN..tp..s .hSNasT..  
 s.c.c hhlCpl.phsp..hs...hss.sshpIchppslhuhFashcN..tot.s .hSNasTt..  
 s.+c hlCplppsscpshs..hNs.ssh-I+hpcslpuLFasscN..tophs pasNYoTsu

401

1 Pithovirus\_massiliensis\_LC8 100.0%  
 2 Armadillidium\_vulgare\_iridescent\_virus\_YP\_009046748.1 17.6%  
 3 Cedratvirus\_All\_YP\_009329068.1 45.2%  
 4 Cedratvirus\_lausannensis\_S0B74375.1 45.5%  
 5 Cherax\_quadricarinatus\_iridovirus\_ASZ84981.1 16.7%  
 6 Invertebrate\_iridescent\_virus\_30\_YP\_009010370.1 14.8%  
 7 Invertebrate\_iridovirus\_22\_YP\_008357369.1 14.8%  
 8 Invertebrate\_iridovirus\_25\_YP\_009010611.1 15.6%  
 9 Orpheovirus\_IHUMI-LCC2\_YP\_009449240.1 14.4%  
 10 Melbournevirus\_YP\_009094806.1 14.9%  
 11 Marseillevirus\_marseillevirus\_YP\_003407071.1 14.9%  
 12 Brazilian\_marseillevirus\_YP\_009238902.1 12.3%  
 13 Golden\_marseillevirus\_YP\_009310340.1 21.6%  
 14 mine\_drainage\_metagenome\_EQD26795.1 95.1%  
 15 Pithovirus\_sibericum\_YP\_009001361.1 16.7%  
 16 Shrimp\_hemocyte\_iridescent\_virus\_ATE87157.1 15.0%  
 17 Wiseana\_iridescent\_virus\_YP\_004732793.1 22.3%  
 18 PCJ29163\_1\_COA94\_02315\_Rickettsiales  
 consensus/100%  
 consensus/90%  
 consensus/80%  
 consensus/70%

-----EDMSEGVSPICSV  
 QVVTPTTIVIFEPSTGAFDPIDHT  
 -----TEILDGDKPIKGI  
 -----TEILDGDKPIKGI  
 PVPDADKIDFDPDQSAFDPIGTA  
 PVVIGSTVNFPEA-GSFDPIANT  
 PVVTGATVNFPEA-GSFDPIANT  
 PVVTGATVNFPEA-GSFDPIANT  
 -----YDVKSGSYPYI  
 -----EPAYAGLDPLEAA  
 -----EPAYAGLDPLEAA  
 -----EPAYAGLDPLEAA  
 PMPVLTSLRLSLCTSRPLVPSAT  
 -----GDSKIGYDPKIST  
 -----EDMSEGVSPICSV  
 PVPDADKIDFDPDQSAFDPIGTA  
 PVVTGATVNFPEA-GSFDPIANT  
 DESGKNPI--HKRSMYGLERD  
 .....u..Plt..  
 .....u.tPltth  
 .....ps..tuhsPltss  
 .....csh.suhcPItss
