# Supplementary material for: Deciphering viral presences: two novel partial giant viruses detected in marine metagenome and in a mine drainage metagenome
Source: Springer Nature journal article supplement (doi:10.1186/s12985-018-0976-9), 2018-04-10
Supplement: MOESM4 [file 15604840]

>gene\_1|GeneMark.hmm|56\_aa|+|2|172 >NVVL01000001.1 Rickettsiales bacterium isolate NORP64 Contig\_source1382A\_460, whole genome shotgun sequence  
VNIFAFSMLFILPLIKTGIYFIVLYLYPPKNKHFSSLPLKPEHIRSSFCQQLDKKN

>gene\_2|GeneMark.hmm|82\_aa|+|231|479 >NVVL01000001.1 Rickettsiales bacterium isolate NORP64 Contig\_source1382A\_460, whole genome shotgun sequence  
MKKWQLQNIKAKLIALVKQASRGKPEQTTAKERAIEVILPAKRYVDLTSSKISLVEFLRN  
SPLYGAELDLERNQTPCRDIEL

>gene\_3|GeneMark.hmm|98\_aa|+|482|778 >NVVL01000001.1 Rickettsiales bacterium isolate NORP64 Contig\_source1382A\_460, whole genome shotgun sequence  
MLQSRANTQKLLHDIKNNGMPKIALKVKAGARQNSINGIIEIDNKPYLKLSIKSSPEKGGK  
ANKMIIDFLAKEWGMRKSDLTIISGKTSQYKILHIKEP

>gene\_4|GeneMark.hmm|196\_aa|-|780|1370 >NVVL01000001.1 Rickettsiales bacterium isolate NORP64 Contig\_source1382A\_460, whole genome shotgun sequence  
MTDFSIEDTHPGKIIAGVDEVGRGPLAGPVVTAAVIVDRAVVIEGKDSKLSKKKREEL  
FEKISLHYKCSVGIISPAEIDRINILEATKKACQMAVRSLEIEPDIVLVDGNMKSFSDERF  
CSIIKGGDKSVSIAAASIIAKVTRDRMMEELGVFPEYKWAQNSGYGTDKHDIDAIKHGA  
TPHRRSFRVRGFNYS

>gene\_5|GeneMark.hmm|242\_aa|-|1363|2091 >NVVL01000001.1 Rickettsiales bacterium isolate NORP64 Contig\_source1382A\_460, whole genome shotgun sequence  
MKFSLHSRIYSTDSIAIGQTITIEGEDFHLYKSVIRLKLKLGATFRMFNENDGEFMLKITQI  
GRSSIIANVESLLRLPALQKDLTLAICVIKQDRMIEAIKAAVQIGVTRIVPVISERVQHR  
QNKRDKILKSIIQSTEQSERFKPAEFTEEITLKELCAMDDIEQIIWANETESGVTIKNI  
KQIKGRPCVLIGCEGGFSDAEIQMLKSHDHVQSVSLGHSVLRAEIAAIYALSCTSMMRGV  
ND

>gene\_6|GeneMark.hmm|48\_aa|+|2113|2259 >NVVL01000001.1 Rickettsiales bacterium isolate NORP64 Contig\_source1382A\_460, whole genome shotgun sequence  
MLKKDKSDNTPTNESSKNTDEEFGGQNGPDPTRYGDWEKNGRVSDF

>gene\_7|GeneMark.hmm|60\_aa|-|2350|2532 >NVVL01000001.1 Rickettsiales bacterium isolate NORP64 Contig\_source1382A\_460, whole genome shotgun sequence  
MGVSLVQLLVILLIILLFFGAGKLPRVMSELGKGLKSKSMNEDDSKDDSNDDNKNKKG

>gene\_8|GeneMark.hmm|431\_aa|+|2767|4062 >NVVL01000001.1 Rickettsiales bacterium isolate NORP64 Contig\_source1382A\_460, whole genome shotgun sequence  
MTSKQTPAEKELFMTMAERKIYNKWRLRILISILGYGTYYLCRLNFSIIMPAYIEEFSY  
SKTQLGWVITITSIVYGVGKVFNGYFSDKSNARYFMPAGLILSAITFILGFTNSLVFLG  
IFLIFNYWFQSMGWPPAARMMLTHWFAPQELGTKWALGAASHQIGGALTIFCGYLVANFG  
WRYAFFIPGIIAFIVGVILFSALRDSPELGLPPVEAYKGDDEFKEDTSENHLGSMEIFL  
KVFANRNIWYICFANMCVYFIRSGIVVWAPLFLIEFKDFSLVDSGWQVAAYEFAGLPGGF  
MAGWISDKLFGGKRGFVIMFMSLLALALYTFWKLPAEHIYLSASSLACIGFFLSGPQIL  
VGLASADFASKKAVGTANGWVGTGVLGASLSGIGVGLLTQYYGWDAAFMAFIGAAILGA  
VFFSLTLKNRA

>gene\_9|GeneMark.hmm|178\_aa|+|4300|4836 >NVVL01000001.1 Rickettsiales  
bacterium isolate NORP64 Contig\_source1382A\_460, whole genome shotgun sequence  
MKTSAKQTGFILLGLALIAMIFTLTQMSSATAAKKNGKKFGDWVWSCSPANKKTKTPAVC  
VLTQQINMSKDDKQQTVALFQIGYFGKKDLKLVQTLPGFISIEAGTSIISSKKLIAPGK  
YTTCLASGCQAVASISKKDLKMTSSENAVAFMSLNGKQITFPISMKGIERGLKYIK

>gene\_10|GeneMark.hmm|274\_aa|+|5125|5949 >NVVL01000001.1 Rickettsiales  
bacterium isolate NORP64 Contig\_source1382A\_460, whole genome shotgun sequence  
MQRIFTALFVILTGNVSLASKPEPWQLYLQEAATPVMEELTAFHDFMMIIITGVTLFVFF  
LIIYVVLRFNAKANPVPKAFSSNLTVEIAWTLIPVILIIIAVPSFRILKMAEHTPDSDV  
TVKVVGSQWFWTYSYPDHGIEFDSYMIQDEDLLPGQLRLLEVDNRIVPQGKVVKFLITA  
ADVIHSAVPALGIKLDVPGRTNETWAKIDKIGVYGGQCSELCGVNHGFMPIAVEVVSQ  
KDYDIWVESAKVKFASHNSIKPDAIKMAANIKSE

>gene\_11|GeneMark.hmm|524\_aa|+|5961|7535 >NVVL01000001.1 Rickettsiales  
bacterium isolate NORP64 Contig\_source1382A\_460, whole genome shotgun sequence  
MTDHAHHTQTGWRRWLLSTNHNKDIGTMYITLAVVGGGLVGGFLSVLFRMQLAEPGSNFLGG  
DHQFFNVLITAHALIMVFFMIMPVLFGGFGNWFVPLLIGAPDMAFPRMNNISFWLLVPAF  
LLLILSAMVDGGVGTGWTLYPPLSGLLGHPGAADVIAIFSLHLAGISSILGALNMITTIL  
NMRAPGMTLLKMPLFVWSILVTAALLILVLPVLAGAITMLLTDRLNGTHFFTPEGGGDPV  
LFQHLFWFFGHPEVYVIVLPGFGIVSQIISTFSRKPIFGYGAMVASMVIIGFLGILVWAH  
HMFTVGLSYTALVYFTAATMIIAVPTGIKIFSWIATMWGGSITFETPMLFAIGFIVIFTF  
GGVTGVVLANSALGRIMHDTYIVAHFHYTMSLGALFTAFAGFYWFGKMSGKVYPEWMG  
KMHFTLTFIGVNLTFPPQHFLGLAGMPRRIPDYPDAFAGWNYVSSIGSYISYFAALFFVF  
IIFYTLKYGKKCPPNQWGEGATTLEWSVDSPPHHTFETPPTVK

>gene\_12|GeneMark.hmm|313\_aa|+|7535|8476 >NVVL01000001.1 Rickettsiales  
bacterium isolate NORP64 Contig\_source1382A\_460, whole genome shotgun sequence  
MTKSTTGHTNSEMGASVGDYFSLMKPRVMSLVVFTAFCLWLAPGDIHPLIAFVAILCIT  
LGAGASAAINMWYDRDIDAIMTRTQKRPIITGAILPDEALSFGIMSGFMSVFLMALCVNL  
VASALLALTILYIFIYTIWLKRTSIQNVVIGGASGALPPMIGWAAVTGDVSLESFTLFA  
IIFIWTPPHSWALALFRLQDYRNCAVPMMPVIKGESYTKKQILLYSILMIFVVMMPYFLG  
MANILYLGISLILGAGFLYVAALFQTNENQETETHGAGTQGAETQGAKALFWYSIFYLF  
TIFLSLLFLKLPT

>gene\_13|GeneMark.hmm|448\_aa|+|8581|9927 >NVVL01000001.1 Rickettsiales  
bacterium isolate NORP64 Contig\_source1382A\_460, whole genome shotgun sequence  
MKKKIIALVGRPNVGKSTLFNRLSTRKKAIVHDRPGVTRDRKYSDAKLGPMFTVVDTPG  
LEEAEKGKLEHRMMQTMVAIAEADLVCLVIDNEAGITPADKFFAEFIRKYSKKQILIAN  
KSERKFNHDSEYKIGFGTPVPVSAEHGQGLAYLYEIAIEQIDTEDGEEISDPMSGDCLQ  
IVISGRPNAGKSTFVNAIVGDERMLTGPEAGLTRESVEIAWEYKGQRVKLIDTAGLRKRA  
NVKQSLEKLSTGDAIGSIKANTVILMIDATIALEHQDLTIANYVIDQGRSLVIAINKWD  
LIRKKREYEEFEYKLQKYLQVQGVVVYLSSTDNVKTLEVLDKCLDIYKLWNKKISTS  
KLNDWLSFTLEKHPLPIQKLGRRVRIKYITQTKTRPPTFKLFTSDPGSITEAYRKYLVN  
SLRNDFDLPGVPIRLQFIKSDNPNYAKKK

>gene\_14|GeneMark.hmm|220\_aa|+|9927|10589 >NVVL01000001.1 Rickettsiales  
bacterium isolate NORP64 Contig\_source1382A\_460, whole genome shotgun sequence  
MKSVELLRSDTENDLLMLRLQESGYETLSCNLIKYEYELQKVDEAGFKRFKQIIVTSSFAAN  
NAPPAHSGVSAWAVGKKSALASKGYEIRFVAPSAESLKDQFVEDTNKPTLYLSSNYI  
TIDMPFFVTRCIFYKVITYQDSLTEQQIARYKNGVDYILLYSENSAKTFLKLVKENLLHC  
LENSTIITISSKISKVLADYFKTSVVCNGTDLILEYLKSK

>gene\_15|GeneMark.hmm|342\_aa|+|10586|11614 >NVVL01000001.1 Rickettsiales  
bacterium isolate NORP64 Contig\_source1382A\_460, whole genome shotgun sequence  
MTQPKNTKNKKKLDENVPAKNSPGGQAKKSEEVLEAEVLGEKALEVELLEEDSAQKLEP  
RKINYFKKFLAATILLSWVFLKQLYPDFLEHFEDEKAVIITEQPQPESELVKDALNS  
SYDPGAEPPLSFAPNNLIEDINEIILPEEEADEENPYEQLVETQCRLHVKLATTKLRDR  
LLNNLDDYRLYLANMNQLVIKFKSDKRYEFELKKSARPLPSYIRDIVSMLELYDRQLAA  
NIAKAKANLDGKAGRDGRAALNDSGSGVAEPDLGKDTDLGEMLGLEKKIDLGILSKFIKI  
EKISALSEEQKNLKRREIEGQLRVLVQYIYSSSELQDKFINRVR

>gene\_16|GeneMark.hmm|355\_aa|+|11615|12682 >NVVL01000001.1 Rickettsiales  
bacterium isolate NORP64 Contig\_source1382A\_460, whole genome shotgun sequence  
MIRLLILCVIFVLFYIGIGAMEHYDSALKFTALGYHIETTLFAFTAFAFVIIQLITMICKL  
LVYLMFNLPQIIRNEWQRSSIQKLNRLKLLNTLAELLMGNKKKSLGLASKLISSLNDKNKN  
VIHLILAELSDNPGKREEYLRNLTTEKHYSIYALKRLAEISYKNMHYKQAEYALKAFNE  
DDTDELMLSLIRIYASLKTWQRLVFFVSKLQRADTKLLQKHSGEIAEYLYAAKDYVQE  
ESDDEALNYLESALELNPCHMPALNLFKLVANMKNSSSALKILKSFAAATPSFELAKMY  
ANSAHSSSDVVYGTLANLATPAKYPELFLALATYLNLPDQIVKIKEASLSSYAPV

>gene\_17|GeneMark.hmm|354\_aa|+|12669|13733 >NVVL01000001.1 Rickettsiales  
bacterium isolate NORP64 Contig\_source1382A\_460, whole genome shotgun sequence  
MHPSDDRNIKLDGRQLELLKIFEQIAGEIKPNNFASRFKRLFSAGGHIRGIYLGHSVG  
RGKTLMLNMFYDQISLPKEMIHFKFMQDVHTKMHQLQSASTNRVVDLAADIASRAQVI  
CMDEFEIKDISDAMIIMRLFYKYLAKKNVFIFLTNTLPDNLKYDGLQRESFLPFISMLKR  
HFQILHLDTEKDYRYNAVSHFENRVLYPASRETAQEIQGIKEKLSEQAVFSKTDLSVFR  
DISFNQAHQNILFTNFKELFERDLGYVDYVNICENFEIIVLESVRKIEEDEQDIITRFIN  
FIDNAYFCRILLFIEIKCKPEEIYPRGRKTAEFERTISRLNEMNTKNYLQREIS

>gene\_18|GeneMark.hmm|270\_aa|+|13730|14542 >NVVL01000001.1 Rickettsiales  
bacterium isolate NORP64 Contig\_source1382A\_460, whole genome shotgun sequence  
MNFDPKPKFITFEGGEGSGKSTQSKMLHEYLRRHIKSIHTREVGGTPEAEQIRNLLVYSE  
LLPVSELMLVMAARYEHINNVIIIPALQDGNWVICDRFVDSTACYQSGESGLTIDDIYELH  
DQLMKANYKNSAGADGASAHSISAHRTGPYNTSAHGTSPTYSTSARVFDTDISNFQNTSS  
QNSSPSPENMGIMPDMTFFMDIPPQIGLRRAGARGDVNKFEGKNIDFHMKIYERFKLAT  
EHEDRIISPCENLSIDGIHKEVLNKIFKV

>gene\_19|GeneMark.hmm|675\_aa|+|14543|16570 >NVVL01000001.1 Rickettsiales  
bacterium isolate NORP64 Contig\_source1382A\_460, whole genome shotgun sequence  
VMYKYSINIFLLFASLCITINSSEAKIMKEDQLIPREVFVGNPDRIAARLSNDGQNIIFL  
APKDGVLNVVWVAPGGQISEARVVTDEKRGIRSYFWAKDNAHIIYAQDKKGDENWRLYSV  
NINTLEQKDLTPDGVRSVLKLSYKFPSQMLIQLNDRVPEYFDIYKVDINTGARELYE

NTGQYASFTADDDFNIRAGYKMLPSGEGEYILFENGNEAPKLFQKIAIEDMLTTSTLHI  
SHDGTKLFMINSSGRNTSSLVEVDLATHASKVLHTDSKADVSDYLINTKTKMVQAAATNY  
MRKEWTIFEPSIASDLEHLKTIEDADVEITSRTLEDDQWIVVFLKSDGPYKYYSYNRTTK  
EASFLFVSNKQEGQNFAMHPVKITSRDGLDLISYLTVPRWLDNGSGIPSKPVPLVLNV  
HGGPNARDSWGFSPEDQWLANRGYAVLNVNYRGSTGFGKAFINAGDGEWARKMQDDLADA  
VNWAVDNNITKRDKVIMGGSYGGYAALVGMSTPDMYVAGIDIVGPSNLETLLKSVPPY  
WKPQIAHLVKIIGASPETEGRKFLKERSPLTYAHQIKKPLMIVQGANDPRVKQAESDQI  
VAEMKKHAIPAMYLLYPDEGHGLARPENRLSMYAYAEMFLANAAGGRVTPHDSSEFPDSSV  
EMREGGDINWTREKN

>gene\_20|GeneMark.hmm|116\_aa|+|16657|17007 >NVVL01000001.1 Rickettsiales  
bacterium isolate NORP64 Contig\_source1382A\_460, whole genome shotgun sequence  
MSDSYVDYILDLLSPYGNITAKRMFGGGHGIYKDSVIIALIINEELYFKADGTNKEQYEKL  
GSSPFIYEAKGKPVVISYWQVPLEILEDTSKLPVWMEQSFEISLKILQEKNRKKKL

>gene\_21|GeneMark.hmm|65\_aa|+|17138|17335 >NVVL01000001.1 Rickettsiales  
bacterium isolate NORP64 Contig\_source1382A\_460, whole genome shotgun sequence  
MASQTLFIGPRGQITLPKKIRNLFKSDAVVLELVDNEHVMISPVDPVGGAIFFNYAKKNRF  
NFRRS

>gene\_22|GeneMark.hmm|136\_aa|+|17386|17796 >NVVL01000001.1 Rickettsiales  
bacterium isolate NORP64 Contig\_source1382A\_460, whole genome shotgun sequence  
MKKYIADTNFILRYLLADNQESYHQTKIIFEQARIGKQCQIEIEQSVFAEVIFVLSSFYEV  
PRLEIVKILKSLLSYKGIKVDSDIYSVALDVYLEHNIHIVDSIIAVKTLTSGDELLTFDK  
KLQNVILKKLNSENNK

>gene\_23|GeneMark.hmm|134\_aa|-|17903|18307 >NVVL01000001.1 Rickettsiales  
bacterium isolate NORP64 Contig\_source1382A\_460, whole genome shotgun sequence  
MPTIDKKKNVILFIDDEKICHTLVELIIPNFTDFKLVGAFDGEAIELAARYANSLCLVI  
SDVILPDMTGYDIFKTLKQNDKFAKLPFIFQTGLGSQEEELKKNINEGVQILYKPYNQTD  
LLAIDKACPKEER

>gene\_24|GeneMark.hmm|246\_aa|-|18322|19062 >NVVL01000001.1 Rickettsiales  
bacterium isolate NORP64 Contig\_source1382A\_460, whole genome shotgun sequence  
MSKNSDSSVLEERDSSSNMDEVSFLLKIGHELKTPIHGIGGITKFLNSNWESLDDKTRRE  
CIVKISEASDSLNDLLDSSLNRTDGNITIELSLKSNLIEVTKLATSECRNFYVQEKDIK  
ISFKTSLDEFFITFDQLWYQRLINLICNAINYSKGEIVVEVAKRAIDGEDKCIISVKD  
EGFGIPESELKSIFEPFNRSSRKTTELKKGIGLGLAICREIVDAHKGITIRAVNNEGAGATI  
EILSI

>gene\_25|GeneMark.hmm|296\_aa|+|19328|20218 >NVVL01000001.1 Rickettsiales  
bacterium isolate NORP64 Contig\_source1382A\_460, whole genome shotgun sequence  
MNNTRIIIFTFILFISFARGDIHQASSVLEINNRLLELLEDNNSKKTLLIIPVQNFLK  
RTNPYFNIEDRNLRPLIERVLKVKLSRETYFEELLLTEYENKPADPFKDFIHNLQNKK  
LPLIAITDSSSGGFNKIPFLEWISNRLLKEGIDISKSPLGEKQIIFNKNFKQTKGSYPT  
FYRGLLSSNMHGADNMYEHILAFMLIEKWKWMPDTIYIIITEENTIKLLQQQFKHIDPDV  
RVIGFHYLPPQNKLMNKALSNIQKFMQFWEGVITKLNNIKLNKHSKAKGAKDPYEQ

>gene\_26|GeneMark.hmm|283\_aa|+|20208|21059 >NVVL01000001.1 Rickettsiales  
bacterium isolate NORP64 Contig\_source1382A\_460, whole genome shotgun sequence  
MNNKFTNNTLILFWVTSLSANIANAQLIKTYSVNSSSMAQIETWADKDTIIFITLDN  
TLTIPNSLMFSYNSEANRTFIQNLASLGKQMPAYNKIIATWYQQRKIKLVEPQWAGLITR  
LKAKGATVYALCSMPIELVNIEEKRYKELKDLGIILTSTVNQKEKLQIGKNSSWPARFYK  
GIIFTAEGGPSIALMEFLKITNISVKKMAIIGNIEYKLKELEQILRTFDMEYNYLILGA  
RELATNPDPPELIKFFQQQLVNNGVWVWEDAAALRARAARLNPAQ

>gene\_27|GeneMark.hmm|336\_aa|+|21099|22109 >NVVL01000001.1 Rickettsiales  
bacterium isolate NORP64 Contig\_source1382A\_460, whole genome shotgun sequence  
MLQNYLQKYFTKAFYPTPHRNWYKEKGYVGADSSLQFADFLTTQKKNKTSKFHEEFKSLD  
ITRQYVNSGEHKLDSVILTPYKSISRNPGEGLYFVMFQGRGEYYSRFRDMALQAKETG  
ASVVGFNPKGFHASSGKTQKLYDIVEDGIAIIGFLEKGIIPSNRIIMQGNLSGAGVQEMV  
SEHYAHVKNIRFRQINSNSFKNLASVLAYHYKAPILERVFSVILKYAGWEISVGAEFYKT  
GPYRCLLRKGDRTIGGFAEYNAMVNHQEDYENCSDYRETNKWLNEHNQLIYGRSKKD  
PHALSLHHFAIKGEGKRSVYYLINRYLAASNTIVVI

>gene\_28|GeneMark.hmm|161\_aa|-|22256|22741 >NVVL01000001.1 Rickettsiales  
bacterium isolate NORP64 Contig\_source1382A\_460, whole genome shotgun sequence  
MAKESEITNESNIVNIAGKSNLAGRNAAIMFHKPYMETAFYEKQHLETECAQLGVTIINA  
IYNEDKDAFVAYKLLPYIQQENDNSKPLLLFANAKNLVLPENRMSKIILSVLIDLKEIE  
LYLYNQGFNMKNGKSELALEPCTAKGILHIKQPDPSLGVFI

>gene\_29|GeneMark.hmm|84\_aa|-|22959|23213 >NVVL01000001.1 Rickettsiales  
bacterium isolate NORP64 Contig\_source1382A\_460, whole genome shotgun sequence  
METEEAPQKTRLKNSPHRVRYPNGIARGGALLLYNNHRINLYSTILFKLLNTLAILVDSA  
TGMTKSVILEFESFFASGYLSAIK

>gene\_30|GeneMark.hmm|851\_aa|-|23312|25867 >NVVL01000001.1 Rickettsiales  
bacterium isolate NORP64 Contig\_source1382A\_460, whole genome shotgun sequence  
MVGKMLNNSMRIMLLTTLFFNTHAAIAAPSDPEGTSTSEASDSEGSASSLLNSSDNDSD  
DTASVHSEASDLGANYTLIDKLTFTTDRFGFQEENFADDYDPIQEISVGEGQSLSIEGN  
IGDNYGDDYEAQKEHYTQILEENEDFKEAIELDEVKLTGIEEITGTGNVVFTGNVNCW  
LGNEDEYLESIETQGDITIFIKAIYAKHLTFQYETMMFSRHINTEHITLNQAELTFKQGAD  
RAIKITGVGTVIYHKGSDLGAITLTVDEGGYSGELVLMATEDNTEIYEMTANITARLEQD  
ENATLNNGFELNNLDAENKSTASPAVSEHDNDSTDVDDEHLSSSSSESDDDDVAEVP  
IAIPAAPVQEAKIDNAPAPARHSSPSSEVSDNRPPSSEVSDNRSPSTSNEESLPQIIKNC  
LNYSNKDDPAQNKTITTETPEEQTKAANEAIYQVAGREISNIDKNIKTEDIVQFVAKV  
TTQQARDLSPNTQKVIYIAEDDKTAEVRKKEHTATAHFTKAQKEASQLVVQSVISETTA  
RIANISLNSQPNFISNLASNITGTAAGDSHKIEKGVWISGMLAKNTQKENKNHSAYNAKI  
YGGTIGADAQVTEHTLIGAFYSNITSAFTFKGAAGSKLDAKSHVFGIYGDTAFTDNLSA  
QMILAYGQTTIDNRRKDGTNTAISKFKNVYSGDLNLTYNKYLANNVSIPTMGIRYSYF  
ADEAYKESKAGLNNLSYGKKSSSNLEAMFGAKLIWQKQVLSNLILVPSIKASVHQVLSEQ  
SSKVKTTLAWGEEYFSSDIVKKDKKADKTRFNIGAGLLAKIDNVDLSMDYSLSIRKQYTG  
HQGSVKIRINF

>gene\_31|GeneMark.hmm|66\_aa|-|26034|26234 >NVVL01000001.1 Rickettsiales  
bacterium isolate NORP64 Contig\_source1382A\_460, whole genome shotgun sequence  
MLNLLFNRRIEALMIFIFCRNNELNRYISKAKKHEGSSLNELFIYKLANFYRHHANNYYT  
LIVVLN

>gene\_32|GeneMark.hmm|884\_aa|+|26442|29096 >NVVL01000001.1 Rickettsiales  
bacterium isolate NORP64 Contig\_source1382A\_460, whole genome shotgun sequence  
LKEVFMETTTNLEDFLSAPETYNVLDLSNQNITPAEFIRLFTALKDTNNSTLTSLNCSGN  
KLSSAAIMILADWLGGQNTALNSLNSMSRCYLGSKAITTVVNALEGGGSVKELILCTNAIG  
DETASLITETLRCESLTVLDLEGNQISEQGSAAALCGKLAKLGDNLKILNQLGEQGVIDI  
FPVQVEAAEIKGAEVDVLAKMAEVYEGVQGNSELCLVIGNTGAGKSTFVNYLAGNRLQV  
TQDPESKLLVDRHPEDTPLAGITINHTSASGTKIPYQCSVNIDEGEAEPINITIWDCPG  
NNPSSDANIEGTISGFTFDRLFEATKQVKLLLVPEFDITHGRGNFVNAIARLTEEFSP  
RVLDAVSLVTRVTEQRNEANIKYLVREVFNENDTLRGFADDHPIKGVIKSLLQDSSTIH  
IFPKFAEPAEEIQPDMELIASIHASGDYLHEPNAQDVRVSEGVKGYSENILRELVYNNLN  
MMLHVISQALVNPTDCRSSDPEKNAFLRNYESIKPLVPESYKHFAPMLPLEENQFLTPNP  
DHPGAAEERHFTDLQSELKDILWQFKNGDFLSLREGMNAIASVLSSEFEKSIDVANRDT  
KDVLLQYAYALHQQLNCFEISGMGAEPFLAAEPLALQQYMTQCYNIGICRNLEAGVRALE  
IEPDGGSQAYYDQAISYLTKYSDCEPVIAQAYMFKAQLEESENANVAVGYAQAIDIDAA  
PADACEKLGDLLFKSGDLPNAVKAYSALHYVSKIDLFCFATLQAQPTSTENAALMSIANY  
RSQWKEGEIVYLNLTNANHSSEFFAQVKGAVTLHMRDShLCEVLNSGKFYNFAEVNEEFR  
ASLLLAYPDEVAPEPGVEAFLVPVELEDVPGIIGAPAAGEEEVA

>gene\_33|GeneMark.hmm|41\_aa|+|29303|29428 >NVVL01000001.1 Rickettsiales  
bacterium isolate NORP64 Contig\_source1382A\_460, whole genome shotgun sequence  
MSREGVPYIVLPISAGQVFSILVKIDDAKLLRVNLSGVRVS

>gene\_34|GeneMark.hmm|207\_aa|+|29577|30200 >NVVL01000001.1 Rickettsiales  
bacterium isolate NORP64 Contig\_source1382A\_460, whole genome shotgun sequence  
MSRGIFATTKGSVSADQVRATIEKFSQGKEHYIGGFHEALRSCFDSKNIDIITSAFRNEK  
TVSVQCGSEVWLLEMAPPPPLYPPGSENNPIASHVTMPALESLIANFARNSTLQALGF EK  
AMEDYFNVS DLQNIISILLNGNDVYIICARGRILQLTEENLSPPRHLLPEPVAVEELTDS  
PDSPGSPDFSDFS SAKYLGGESDFVF

>gene\_35|GeneMark.hmm|100\_aa|+|30254|30556 >NVVL01000001.1 Rickettsiales  
bacterium isolate NORP64 Contig\_source1382A\_460, whole genome shotgun sequence  
LFEGFTSRGNYYGSEFIENMQSYFEKEDLEKLASILWDLKEKAYVMCSCGEVLCLGADIV  
SLPALSPLLAGDAEEMEEHLNTD GKPD SLVAGDGVA AFVI

>gene\_36|GeneMark.hmm|67\_aa|-|30734|30937 >NVVL01000001.1 Rickettsiales  
bacterium isolate NORP64 Contig\_source1382A\_460, whole genome shotgun sequence  
MAVQISVHGGNGEKAIRD LKRKMQREL VFR RMKMSRFYEP P SAKRVREKQEAERRIRKNN  
RRRRLES

>gene\_37|GeneMark.hmm|236\_aa|+|30967|31677 >NVVL01000001.1 Rickettsiales  
bacterium isolate NORP64 Contig\_source1382A\_460, whole genome shotgun sequence  
MLKYPLIIVSLHVKKKGRV GAKMTDISRKQAERRLKFFAALAKLLATNMWSEALLGKV

EESCAFDKGYNYALFPEGVSQIAVSFESWQDEQMLSALSKEKPAKIRECIARALEIRIM  
DVVHKNVAINNSGFFMMPQNILEGKAAFRCTDLIWKYAGDQSADFNYTKRGLLSVYK  
SASAFYFADNSKDHEKTKIFIKNALDNIVNIASLSRIKLPKIPKMEDLPILRLFS

>gene\_38|GeneMark.hmm|1056\_aa|+|31739|34909 >NVVL0100001.1 Rickettsiales  
bacterium isolate NORP64 Contig\_source1382A\_460, whole genome shotgun sequence  
MTEQKYYPEAKSTVSFPEIENEILKYWKENKIFQKSIDNRESVIDGKKNEFVFDGPPFA  
NGLPHYGHLLTGFVKDAYARYQTTKGGKVERRFGWDCHGLPAEMGAEKELGFSGRIAIAE  
YGVDFKNDHCRSSVMKYSKTWEQYVDRQARWVDFEKSYSKTMDFMMSVWLFKELYKKG  
LVYESMRVMPYSWACETPLSNFETRLDNSYRERADKAVTVSFELAQKPAGAPDGCSEYRI  
LAWTTTPWTLPSNLALAVGGEMEYACVVKDDVCYIIASFVNSYAKELGVSEGDEFVLEK  
GSDLAGLSYKPLFDYFKDNAKSFEIFTAEFVVEGDGTGIVHMAPGFGEDDQVVCEEKGIK  
LVCPVDNAGKFTSEVTFDFAGMQVFDANDKIIHLKEQGNWLKTEQYIHNYPHCWRTDTPL  
IYKAVPSWYIKVSQFKDRMVLELNQEINWIPGNIKDGMFQKWLLENARDWSISRNRFWGTPI  
PIWRSDSAYPRIDVYGSIEELEKDFGVKVEDLHKPFIDDLTRPNPDDPTGKSTMRRVGD  
VFDCWFESGSMPIYGQAHPFENKEWFEHFPADFIVEYSAQTRGWFYTLMLVSTALFDRP  
PFLNCICHGVILDSTGQKLSKRLNNYADPLELFEKYGADATRATMLSRGVVKGQELMIDK  
EGKMFVDTLRLFIKPIWNSFHFFCLYANSDGIAEQSFESDNVLDRIYLSKLLKATSAIE  
NNMDAFDSQGAYGAISDFFEVLNNWYIRRSRFRWKAEKDQDKISAYNTLYTCLETMSRA  
MSSLVPLISEHIYLAITEKSESNMSVHLTDFPVLDEIQIDEGLVETMDRVLDICSTALFI  
RNSENIRVRQPLASLKIIVDNSSVFKDFEDLIKDEINVKSIEYNSDLANYADKKLSIKFP  
VLGARLPKMKIEIVASKQGWEDGTSLTVAGEELLSGEYSLVLQPKKECGGKSLSDNQ  
GMIVLDLEITKELADEGVARDIIRLVQQARKDAEFDVSDRIKLELKSDFDLSGILAVHAG  
FISEQTLSELAYGISEDYKVETSLQDKNLEIRLQRL

>gene\_39|GeneMark.hmm|448\_aa|+|35179|36525 >NVVL0100001.1 Rickettsiales  
bacterium isolate NORP64 Contig\_source1382A\_460, whole genome shotgun sequence  
MKKIFLLPLFLICVPTMSSAITLEQALVSGYNHDEVLKINKTDFLQEIIEFPRALAEFMP  
RITAGIDFSHTRRKSKNSSLEHKGSHHTQSVTLNQPIFNGGASLAKLKAARFAFRASMGK  
YYAAEQDQILKEIDAYLSCAATREKYAISKMSVKSNTQLEAMKEKFKLGESTETEEVAAS  
EEGLATAESNQSIAYANYEASRAEFFRIFGVEAAGIKMPALSEGLPKSLEEVLEALAKN  
YSIDQARYSSQASKSEYASKGVLLPSVLSVRGERIKFKKQDPARNRSNNNSVTSTISV  
KVPILEKGGFEYSEVRRRAKHQTRKTIIALNNTIKTIKSQGRASWSFLSANKLRIKSAKA  
VKAAEIAYDGVQQEEMLGSKTIIDVLRTEGRLNDARSNLVEAKKALVLAGYRIQVLMGKL  
TAKSMNLKVEHFDPEAEFKRIKFRIIGF

>gene\_40|GeneMark.hmm|129\_aa|+|36528|36917 >NVVL0100001.1 Rickettsiales  
bacterium isolate NORP64 Contig\_source1382A\_460, whole genome shotgun sequence  
VLQEIAKEGITKEGTASGEGEASLGEVLKSIRGAIDNPSPNLSFESDDDFYGDDEGYGVL  
ELTNLVSDADLARTPHKNTGNAQHIGQELLEQTLEKVMRPLVKEWLQKHLPRVVEKVVTQ  
ETRRVMPKS

>gene\_41|GeneMark.hmm|851\_aa|+|36955|39510 >NVVL0100001.1 Rickettsiales  
bacterium isolate NORP64 Contig\_source1382A\_460, whole genome shotgun sequence  
MARNLLLFLSILLSSWSYSLAGNKPPLMGTPFMGTPLTEGTLEGVPLAEGALEGRALVA  
SLLTTPPVQVADPIPMTHPVAPAPFAGTLLTGILLADASPNGVIFDGMVVEKDAIKEDNLK  
EANLEKGSVKKASPLQDPGASGELAVASIEGAGGEEAALPSMPESSIAEKSESFLAKGEEK

SFFAKIKSFFGFDDDEKTQQPESKSAQGAQALRAGSAGGRGAESLFAPLEPGMDDGDAG  
LVTSQPVGANDEFISGELPQIPSGFSQMPADSGQIDSGDELRLPDGFNEIDEDFSTVEAS  
SSSSMPGSGEPDFEALNSAGSGLAGSSLAGAGSTDPASAATSFAGSNNRDAGNISLSKED  
SKPEMSLAIPTEFEEYATGATGGALGDAAKNELDTQKETLGQKQNQTQESLQRQSSKLFQ  
PSEQAVMPANPGASSAEQMGKLTTKSAINSAAEQSAQVVPANSGTSSVEQMGKLTTKSA  
INSAAEQSEQALTPANSGASSIEQMGKLTTKSAINSAAEQSEQAVTPANSGVSSAEQMGK  
LTTKSAVNNSAAEQSSQVVPANPGASSAEQVGLTTPAGKQVAKSDDKLEAKQPTTPVT  
PVKPAKLPNASTGKEPLPTPSYAKELTLPREETATSKYEAELRQSAKSELPHISPE  
ELSLAQDAQEAKPDPVQLKFIANEALLVLPNDIVLDELTEADAKLDLIDLRLYVDFLWE  
EYRKSNEEKRAEIDNFVDNYDANFNKTASLHGENHAYEGLTEAFKAIRNDNLSLISIL  
NSYPLLQLSDGNGNTLLHAAARVGNYPAAKLLVLKGVDFAKNRLHQTALSIARELSHDE  
IVTLLKSAGLK

>gene\_42|GeneMark.hmm|1154\_aa|+|39654|43118 >NVVL0100001.1 Rickettsiales  
bacterium isolate NORP64 Contig\_source1382A\_460, whole genome shotgun sequence  
MESDQYYLFKDRRFLPIFIVQFCGALNDNILKNALILITFKLANELTLSSYTLIMLAHM  
LFTLPFVLFASISGQLADKYERSTIVKIKFVEIGIVIASYGFYTTNLPILFGCIAMMG  
THSTFFGPIKYSVLPDHLRKEELLGANGFIEAGTFLSILLGTMMGGFYNFNLSLAL  
IVSVVGFVASLFPKSNFNPVVKINLNILQETVNMVKAATKNQVYMAILGISWFWFIA  
ATILAQIPLTKDILGADESVASLFLVTFVGVGVGSFLCNKIFNNTITTKYIFLATMGI  
SVCIIDLFFASSIAAVSDEPEQLTISEFLTRGHRWRIVIDLFLLSAISGLYVVPYTVM  
QYFSARSHRSRVISANLNINFFMMGSTITLSVLRVYDFSIKSVILFVAICNTMVAIYIY  
RLVPDSQIIPRKVWTFISKIIFGIMYKIEIKLENYKKAGKKTIIIANHLSFVPEALIAV  
YVEEDLQFAINTAIAKEWWWKPFKIVKTYVPEPNNPMAIKRLIEEVKKDKKIAIFPEGK  
ITTTGSLMKVYEGCGMVADKADAAAILPIRVDTGTQFTSFSRVSGFLGGKFSRRKVTITIL  
PPVKITPPEGAVSRERRKYIRQGLYDIMSDMTFESSEYNITLFQAMINASKTYSSNLKVM  
HDVEHNKANYRSILIKSFISELCDVTKPGEKLGMLPMVMGTAITFWGMQAAGRVPAM  
INFTSGSANVISSCNTAQVKILYTSKKFIEKAELESVKAUSEAGIKVVYMNLRKRVS  
GLKLLKALVASMFPQRYYSLNQDTSASSTAVILFTAGTEGRPKAVALSHKNLLANTAQAL  
ARIDFNPRDIAFNLTLPMFHSFGLMASLVMSLNGIKTFFYPSPLHYRIPEMIYDVNATIL  
FATDTFLAGYGAHAHPYDFHTIRYVIAGAEALKERTRKLWSDKFGIRIFEGYGVTEAAPI  
ISANTPMHNKPGTVGRLMPKIEYFLQKVDGIKEGGKLCVKGANIMQGYISPDNPGVIVPP  
VVEKLGEGWYDTGDIVSVDEERYITILGRQKRFKAKIAGEMISLAGVESLLIKLDPEAEHA  
AVSIADEKKGEQILFSTGKDITRERILQTCQKQNYSELYLPRVIIPIKEIPMMVMTGKRN  
YRKMTEMAKKKVG

>gene\_43|GeneMark.hmm|77\_aa|+|43108|43341 >NVVL0100001.1 Rickettsiales  
bacterium isolate NORP64 Contig\_source1382A\_460, whole genome shotgun sequence  
LESRDIQVSVESIGAIISPLISALFASNPNDYFFLTKGEIVAIGLLCFVRIIDDFDFS  
NFSKISKQWDLNLLIAI

>gene\_44|GeneMark.hmm|92\_aa|-|43460|43738 >NVVL0100001.1 Rickettsiales  
bacterium isolate NORP64 Contig\_source1382A\_460, whole genome shotgun sequence  
LDNFSNSAMLSQEGFVVESELHETIVNDARKESSLTKLLIISIGLLFWVKIIQQLSISR  
DRMIGENNKSPNSYQGNRIKILRELLPMIYLI



>gene\_45|GeneMark.hmm|320\_aa|+|43791|44753 >NVVL01000001.1 Rickettsiales bacterium isolate NORP64 Contig\_source1382A\_460, whole genome shotgun sequence  
VGVTQDLTKAFEWYRKAADQGHAAAQNNLGAKYLN GEGVTQDFSKAVNWFRRSADQGHGA  
AQYNLGVLYANGDGVAQDLTKAFEWYRKAADQGDADAQYSLGFQYDKGEGIIQDLTKAFE  
WYRKAADQGNFAQNNLGAKYLN GEGVAQDLTKAFEWYRKAADQGCTLAQHNLGLQYANG  
EGVAQDLTKAVNWFKAADQGHGAAQYNLGVLYANGDGVAQDLTKAFEWYRKAADQGYAD  
AQHILGVLYVNGEGVAQDFTKAAKWFRKATDQGHADAQHILGILYTEGKGVTDLTKAFE  
WFTKAADQGHAAAQDNLKLLK

>gene\_46|GeneMark.hmm|451\_aa|-|44841|46196 >NVVL01000001.1 Rickettsiales bacterium isolate NORP64 Contig\_source1382A\_460, whole genome shotgun sequence  
MTATILVDDNEQNIKLL EAKLVSEYYTVLTAENARGAIEILKKNKVDIILLDVMMP EMD  
GFTACREIKSNKDTAHIPIVIVTALHGVDDR VKGLEAGADELLTKPIDDVALFARVKS LA  
RMKAAMDELTLRNSAITELGGKTIKLT SFANNKILLDDDLIQAKNIKSKLTS LTQQIQ  
IISSAADIAGLGSFV PDLVIISCQLSDQDPLRISAMLR AKPSFKNIVLMLLSEENISIV  
IKGMEIGINDYFVYPVTKEELQARIRTQLRRKQYQDDLRL ELENIDLSTKDGLTGVFN R  
RYFDIHIKHLVQLAQNSRH DCM MMFDLDDFKVNDTYGHQAGDAILREFSKSLKSSFR A  
TDLVARYGGEEFIVLLSDVGIKKATQIAEKTRAAIAKIDFTIPGETKTLKQFTSIGVAKF  
NPNDSIESFIRRV D KALYN AKESGKNCVIAG

>gene\_47|GeneMark.hmm|124\_aa|-|46199|46573 >NVVL01000001.1 Rickettsiales bacterium isolate NORP64 Contig\_source1382A\_460, whole genome shotgun sequence  
MPKVFAIEDNELNLK LFRDLLKI QKCDIILSDDG VGVLETAIEEQPDLILMDIQLGDING  
MDLIRDLMHEKTKHIPII AIT ALAMKNDELQILEAGC AMYLAKPVAIN DFFKATSKFLN  
LVDE

>gene\_48|GeneMark.hmm|159\_aa|-|46697|47176 >NVVL01000001.1 Rickettsiales bacterium isolate NORP64 Contig\_source1382A\_460, whole genome shotgun sequence  
MIQISCYLTELEALPKVFCGLAEKCYSDMRTLVL TENDSFSTSLDRVLW TYSKKHFI PH  
AMSGDPQPEDQPILITSAFEHSNNAEIVFVNATESMILEAAAAGSAVRLQNMKKILFLF  
DDAQKMQSSEINNILK KSSLGFEFELK SFAKTSQGTWKT I

>gene\_49|GeneMark.hmm|328\_aa|-|47298|48284 >NVVL01000001.1 Rickettsiales bacterium isolate NORP64 Contig\_source1382A\_460, whole genome shotgun sequence  
MIRSMAGSYNMRLIYNFFFIIIFLPAMSFAATAAGAGDGTIAEAGAKILEAGAATIRTNV  
KILVTDATT LGTDTKVIEADAIIVESASGTNARGIAATDKVSAADA EVTATAKV SAAAAS  
EPMAGAQGGGRINSDKQIVKARHIEECIGKTDGATEQIARFSVKA AVVDVESILEHSFAI  
QHIIKSITTINNKIQEELSVKDIELKHIESDLIKRGTLD RKKFELKVAEFNKKVSMVQR  
EKQKKKSALERAHA EAIALVQKNMNLVISELSK KHGFNMVFPSMQLLFVSHDLNITLEVI  
TKLNKRLKKVDIKYELYRDNKSPEDTDS

>gene\_50|GeneMark.hmm|762\_aa|-|48309|50597 >NVVL01000001.1 Rickettsiales bacterium isolate NORP64 Contig\_source1382A\_460, whole genome shotgun sequence  
VKNIFNIALFLMAILSSSAMA AKINKINVRGNKRIEQSTIVDYLNV RVGDHYSEAKKNE  
MIKNLYATSLFETINIAFHKGALKVSVQETPFISRVVFAGNYKVRTKILLNEIYTAPGES  
LRKAKIRTDVEKIKEIYKRSGRFSVHVSSKIEPLENNRVK VIFEIDEGPKTG IKNIYFAG  
NSHYKDSELKSIVLTKE SRWFRFLETNDTYDPDRIEFDKQLLKR FYNSVGFADFRVISVT

SDLLPTKEGFALTYSIEEGEKYKFGKITINNKLDTIDDSEVLKFVDAKKEGETFNLSAMQ  
RMAEKVSKYLGGKGYQPVEVHPEVTPNRSAGTVDDVVIVVDQASKIFINKINIEGNLKTED  
SVIRRQLQIAEGDVFNRSKLERGQRNIRNLDYFGKFNLGMSQTKKQDRYDINIDVEEKST  
ASFGFDLGYNTTGGMFGKISFLERNLIGSGRQFNAGVQIGKKSTHYTGLTDPDFLGLDL  
SLGGTLFKSDDGTGSGFENGKQNYSSSTIGTRINLGYNITDDLHFGIEYGIKKSELKAPG  
KTASIFIKEQMGKFVTSEISHSLTYDKTDSRILPKNGYLLTAEQAFAGIGGDTNYLKHEL  
SGKAFKSFVDNKYTLKFAAGGHIKGLKGGKVRIPDRFTVGDYNLRGFASGGIGPRDVAT  
KESINGQKYYTLSTELSFPLGLPEEFNMTGSIFIDAGALWDADSTAATSKGLYNTKTLRS  
SYGFGVLWITRIAPIRLDWGFPKKEKFDQVVFHIFSTHL

>gene\_51|GeneMark.hmm|100\_aa|-|50850|51152 >NVVL01000001.1 Rickettsiales  
bacterium isolate NORP64 Contig\_source1382A\_460, whole genome shotgun sequence  
MTKYYPITPGEYLEHEFLEPLGLTQSQSRDIDVPISRINGIVKGSRAITADTAIRGLI  
YFKTSAQMWLNLAQYDLKIAQRKNLASIQNRVQVFKAVA

>gene\_52|GeneMark.hmm|92\_aa|-|51164|51442 >NVVL01000001.1 Rickettsiales  
bacterium isolate NORP64 Contig\_source1382A\_460, whole genome shotgun sequence  
MIKSFCKHTKNLFEDIRGKFKSSIAKFAKMRLTSLSIACSLNDLKSPPSNRLEALKGDR  
KNQYSIRINKQYRLCFSWQRGDAYDVEVDYH

>gene\_53|GeneMark.hmm|290\_aa|+|51904|52776 >NVVL01000001.1 Rickettsiales  
bacterium isolate NORP64 Contig\_source1382A\_460, whole genome shotgun sequence  
MKKLSFQQIILELQRYWQDYGCAILQPYDVEMGAGTFHPATVLRALDKKHWNVAQVQPSR  
RPTDSRYAQHPNRMQHYYQFQVILKPSDNIQELYLKSLEHLGINTKKHDVRFVEDDWS  
PTLGAAGLGWEVWCNGMEVSQFTYMQQIGGIECRPVAGELTYGLERLALYIQGVDAVRDL  
DWNGQTGDRALTYGEVDFHAEKQFSKFNLEADTEILFRQFADAEKQCKALIKEDLPIPA  
YDYCIKASHLFNLLCARKAVSVTERAAYIARVRNLAKLSCQKWVEMEGEL

>gene\_54|GeneMark.hmm|677\_aa|+|52780|54813 >NVVL01000001.1 Rickettsiales  
bacterium isolate NORP64 Contig\_source1382A\_460, whole genome shotgun sequence  
MSELLLELFSEEIPAMMQKASSGYKEIFSKYFAANEIAFDEIDVYAGPRRITIHQGV  
DILPACEKELKGPKISAPQQAIEGFCRSNNITPDELSVQEIKGQQFYIYKEKTPERCSR  
ILLSTLSTPISEYVWPKSMYWGEYKIKWVRPLRNILCVFDGEVIPFEYGHVANNKCYGH  
RFMSPKECVVTNFAEYKKALEENFVILSSDERREYISQGTKKIASKLGLVVKEDAALLEE  
VSGLVEHAEMVVGKIDEKFLSVPSEILVDSMKIHQKYFSLFDKDGKFPYFLFVSNIRSE  
DPDIVVSGNEKVLARLADALYFYNQDLKITLEERALRLEKVFHAKLGLSKDKTLRLAE  
IVRFVSPKSKEAAAAALLCKSDIVSEVVDFPQLGIMGYYYAKAESKSEELALAIRDHY  
KPQGAADQCPSGEGAILALADKIDTLCGLMLAGEKPSGSKDPFALRRQAVGIVRILENK  
LSVDLAEVDFVIKYQDSDLIDIKPDSALNAKKQVLLFLEERVHFFKGEYNHELIALSL  
DFELEPDLLALQMKLSALKSFVTSAGDILLVAYKRANNIIGGAKLTGQVDASAFVLEDE  
RALFACINDYSDKITLALGDSNYSESLKLLANLRKPIADFFDNVMVKDKDPLIANNRLL  
LDQTKKIFNKLAKFEKF

>gene\_55|GeneMark.hmm|334\_aa|+|54813|55817 >NVVL01000001.1 Rickettsiales  
bacterium isolate NORP64 Contig\_source1382A\_460, whole genome shotgun sequence  
MSQIEKAAKIIRAGGLVAFPTETVYGLGADAGSQDACLGIFKAKGRPSHNPLIVHAASQ  
QASSFAVFGADAQKLMKIWPAPLTLVPIREGAKLAPCVTAGLETVAVRVPSDARARSLI

EASGCPAAPSANKSGRLSSTTYEHVQKNFGDSVFIVQDDGVKSCGLESTIIDLSTDPT  
ILRYGFITPELLSEALGKEVAIASKLSKIKAPGMMLLKHYAPKTKIRLEAAALNPGEVGLD  
FGNSCLGSGSLRNEGFRNGSMSSEGGSSDSVSSAGSLNLSPSGDLSEAASNLFDYLRHLD  
EFALAHSIKTIAIAHIPNESVGLAINDRLSRAGE

>gene\_56|GeneMark.hmm|176\_aa|+|56102|56632 >NVVL0100001.1 Rickettsiales  
bacterium isolate NORP64 Contig\_source1382A\_460, whole genome shotgun sequence  
MNKIYGVVFTILTGMIVCNIFHVVVLAHFTGYDVLVGFMAATGVLISFVLAETEFSHIK  
VDLIKYRDTKALKLLRTSLIFIVYTCFACAQYMAIYDSFFRSINNVMIIEVTTYALYFISS  
ICFTLLSVVSGYRVVVKLIISKDGKIEEGRLEKIAEGRMSEVVESKEKEQKREFQK

>gene\_57|GeneMark.hmm|434\_aa|+|56751|58055 >NVVL0100001.1 Rickettsiales  
bacterium isolate NORP64 Contig\_source1382A\_460, whole genome shotgun sequence  
MLSGFWLFCALIIFLLRFPVFIALILSGSLGYIWEVGLNPWWHWASFPTNLVSQYHYA  
AIPFLLMGQIASAGNITKDLFVFTDNIARKTRGGVAILTILSCGVFGSLCGSSLATAAT  
MTPIAYKEMKSRNYSKELILGTLAAGGTLGVLVPPSIVLVIYSIIAEEESIALLSIAAIVP  
AILAFLGYVCAIKYFIYKYPNEVPELLPKRQKTEYGLKAVFSLCSILLFFVMLAGLYKG  
IFMQAESAAIGVAGVFAIVAASGNLSKLNWPKIFTESAKTTASIMAIFIGAEIFSVALTA  
FDFPKELAEYVMYTYREYPLGIITIMIAALLVLGCFMDGIAIMLLIVPLFLPIVKELDLWI  
APENIGIWFIIIILMVVEIGLITPPFGLNLFVIKSIEPELEQASNFKSVKYFVAAELVRM  
SLLVLIPGIMWCVA

>gene\_58|GeneMark.hmm|156\_aa|-|58142|58612 >NVVL0100001.1 Rickettsiales  
bacterium isolate NORP64 Contig\_source1382A\_460, whole genome shotgun sequence  
MKILGIDPALTALGWVILSESPKIIYVDSGLIKTKPATPLHFRLANIADSIEEAIDLHQ  
PDVIAEMEETFVNKNAVSSLKLGYYRGALMALIGKKNIPFYEYKPNNIKKTITGVGHADKE  
QVKHMQMIISGTNPKISLDES DALAIAYTCLANQR

>gene\_59|GeneMark.hmm|1023\_aa|-|58612|61683 >NVVL0100001.1 Rickettsiales  
bacterium isolate NORP64 Contig\_source1382A\_460, whole genome shotgun sequence  
MNLSVLCIKRPVFTIVLSLVIMSLGAVFFNKLQVRGTPNISPAAITVNSYYDGADALYME  
KQITAPIEKALKTLKNLKSMSSSSSVSQSNIMLEFELDTDIEVALNDVRSMMPPANYFPD  
DMGAPSISKMDSDSWPTLWISVTSSMHDDLELTRIVNNQIKAPLEKLSTVKGSRYYGGSY  
YSMHIEPINTKMFQHKLTPIDLEAAIRSQNKDYPAGSIKTDSSRSFSLKLAGSLNKPEEFE  
DIIVKKYPDGTIIKLDVAHVRLKPYESDMSMRYNGNQSLAIGLIKQSTANIIELSESVI  
AELPKIVKTLPPSVKIEIAFDGAVSVKASIRAVYFTIFEAVLLVGFVIYFLGSLRITMI  
PLVTIPIISLIGTFSAMYMLGFTINTFTLLAMILAVGLVDDAIVMLENIFRHSHELKPPP  
MVAAIDASKEISFAVVAMTMTLAAVFLPIGLIDGFLGKLFVEFAWTLAFCVLFSGFVALT  
LTPMMTSRMIKQETSPKLFQSFDSYLLRVQDGYIGGLIYAMANKKKFYAVCAGSIVAL  
IASFVYIDKTFVPKEDQGYLIVSFKGVEGASTQESLKTIIAEKTF SKYEDIQGFLT IAG  
DGSGDQGF AFVPLNDWSTRSNSQDELADKLNKDFAKIPGMSIFAISPPFGGGGNSPVN  
FILQTSLEYSDDLQVAQKFVDQMKENKMFENISKDFKASTPTLDIVVNREKAYRYGVDID  
TIGKTVQYLIAGKNVGD FRMGNDIYNVVLRYNKKDRNPNPSDLNKIYVKTCDNELLPLETV  
ASLIETITVKTYKHYNNSKAIRITSDMSKDTSLGDAKIIEMAENIIDPNTTQLKFSGQ  
IQQMNESGGDTLITFLFALLFIYLILSAQFESFSDSLLILLAVPFSMTGGVLTLLIFGDS  
INMYSNIGLITLIGLVTKNSIMLVEFTNQLRETGKNIHDAVIEAAKLRLRPILMTSIATI  
CGAIPLAFASGAGAASRSSIGLVVVGMLVGTLTFTIFVIPLLYETFKKEKDLREERSLGE

## GNS

>gene\_60|GeneMark.hmm|376\_aa|-|61680|62810 >NVVL01000001.1 Rickettsiales  
bacterium isolate NORP64 Contig\_source1382A\_460, whole genome shotgun sequence  
LERLLVVQNI FRVFLLPFLILAQALMLASCSKEIEDSPVVLV KPAKIATHDFHEKFIAIG  
QFKYESSKTYAKIAGTVDSIPTHQGERILKGDILITIDGEIAKTLKNQADASFISAQSS  
YERELSLYKKKIIKTEALDRSKVALETAKANRASAMKKYDNMVIKAPFDGYVGVVRRARVG  
DYLKIGDYLF SFIENGDKTVFIELPEILHGQIDKTTEVFVTDTKGTKSSGRIVAVSDYLS  
NRGTITTKLLFPLSAAIVHGSYVETEIVFNKHSAMGVPEKAVLKNSTGNFIYKITS DNVI  
KQVYVGVGSR TDGIIISSEEITEGDLIVIEGLTKVSDKSKIELIKEDSGTVSSKTTDSK  
AVDSKAVDSKAMGSSQ

>gene\_61|GeneMark.hmm|117\_aa|-|62960|63313 >NVVL01000001.1 Rickettsiales  
bacterium isolate NORP64 Contig\_source1382A\_460, whole genome shotgun sequence  
MSFSKFHIELDNDLAWKLVLLFSAMLLILGTAESAFATENKDVIGETLCRLADTLRGSVA  
KAVATMAIFSVGVGLFLGKLNWGVAAATAVGIAIMFSAPRLISFISGVDYGTKCLVD

>gene\_62|GeneMark.hmm|385\_aa|-|63564|64721 >NVVL01000001.1 Rickettsiales  
bacterium isolate NORP64 Contig\_source1382A\_460, whole genome shotgun sequence  
MSGSENNLEIVIQTDLARALGFASSVVEKRNVM MELGNIKLVAKGGTLEIGATDMDLY  
LNQNIGAEIIREGGTTVSTQTLSEVIRKIPDDEITIKENVLANKLEIIGKNCHFELLTLP  
TEKFPEMEDIDTESSLSISCADLARIIEYTNFAMSSEETRYNLNGIYLHVKGAEFCSAAT  
DGHRLAVASVPLSNKSEEFVIVPSKVTTELLKITKDGQNIHSEMRFSSNKVKFECNN  
LVLISKLIDGVFPDYSTFIPADNESKLTVSKKLIAS AIDRVATITVDKFRAVKLAIDNDS  
IKITASGEAKGAANEMVAFSDEKKDYCNFSGESLSVGFNPRYISDV FSSLTEEQVELYFK  
DEFSPVLIKTAQNPKDSFVIMPVKI

>gene\_63|GeneMark.hmm|474\_aa|-|64767|66191 >NVVL01000001.1 Rickettsiales  
bacterium isolate NORP64 Contig\_source1382A\_460, whole genome shotgun sequence  
MQQSNHVNLSQKDDSYAHLWRDVSKDLTSHY GKDLYRNWFSKINFLESQGGKNILLSAP  
SNFIRDWIKSNYFNTLTEIWKRHDSA IKTIDIVTKEIPADQKNAANTPHTPNISGAAGIA  
NSATNVLENNNDILSSLDTRFTFDNFVVGPPNEFPYAAAMAVAESDNAVVKSNPLFLYGG  
VGLGKTHLMHAI AWHCHEKNPNRKVLVMSAEKFM YRFIKALRSKDVMAFKDEFRSVDVLM  
IDDIQFIGKESTQEEFFHTFNAIIDNNKQMVISCDRSP TDLDGVEDRIKSRLGWGLVAD  
VHSTTYELRLGILES KLEKMDIQISPHVVDFLASKITSNVRELEGALNKVIAHSTLVGRE  
VTLESTQDILRDLLRSNERIITVQEIQKKVAGRYNIRV VEMSSARRLSIARPRQIAMYL  
SKILTSKSLADIGAAF GKDHHTVMHAVKKV GELMLKDSDFHEEITLLTRILQS

>gene\_64|GeneMark.hmm|89\_aa|+|66343|66612 >NVVL01000001.1 Rickettsiales  
bacterium isolate NORP64 Contig\_source1382A\_460, whole genome shotgun sequence  
MNIKNDQLIKLLYQSCNRGCKETDLIIGQFARQNL DNMSSELAIFEKILQLADGDIY  
DWYTKKPKVPAENKSEIMVQILNFEP AQI

>gene\_65|GeneMark.hmm|426\_aa|-|66671|67951 >NVVL01000001.1 Rickettsiales  
bacterium isolate NORP64 Contig\_source1382A\_460, whole genome shotgun sequence  
MKGMNDEKPVKQKAKRAKKSETQVKTISK TQTDPI TDLQAAITAELQKPQTALVTQSGQP  
QTALVTQLQAPQINLPPIPAESTTRI QMKNRSPHDEL FKSLLGNLDSAKDFLTHHLPAD

FRKLVDSLQITVDKESFVEPNLKKRFSDIYKVKTIDNKDAFIMILCEHQSSVDNLIALR  
LDKYRNLLLEREVVVGKQKQTLPLVAQVVVYNGRDKYTAPLSLWEMFEDPALAKELMGGEY  
KLINLQSMDSDEIRERNYVGMMEYFMKYAFKQDQIEVWKRFLKIFGRHLIMQDKDNNYLY  
MKAFFCYTSRKLEDSSKDLLELLVNELLKYEGGQPVRSIADAYIDEGIQEGINIASANM  
AIIHQESEARGEAREARGEATGKMQSLCQTALNMLEQGLGVNLTskvtglseekiklee  
LEFSKV

>gene\_66|GeneMark.hmm|53\_aa|-|68052|68213 >NVVL0100001.1 Rickettsiales  
bacterium isolate NORP64 Contig\_source1382A\_460, whole genome shotgun sequence  
VTGEPKDSGVGTSRTQKQYKMPWDLWLRSYDCTYVDNSSRSKLAKPSVKKY

>gene\_67|GeneMark.hmm|981\_aa|+|68310|71255 >NVVL0100001.1 Rickettsiales  
bacterium isolate NORP64 Contig\_source1382A\_460, whole genome shotgun sequence  
MANSIAMYTNASETISGNVAAEKACGYKRENVFTTSFIKTADGGRVSVNTEIKKTSQQ  
GKLQSTGNNTDIAIDGSGMIPVTTSGNDMIKYTRSGNFRPDELGNLKNGANQLLMAWPLD  
KEGKIPANSSLSLLPVNFANTKGTPIATSIVSIAMNLNAGEEAMRGNGVTAKPQTLGA  
NKTAGDAGILSPDQLGSSGLEIGDRFKFTSTPPGTEKSVIFGGVVVSNTPSNATPIFGAT  
SANMTFDFTGGAITNDQKLIIEVPGVGKYSFRPAAVGNAQRKEFSNIYELADAINNINSL  
NARIGENGQLYVGPTDARKGLNFSEEGGTLVSSFGFSNLAPSAVGEYRFNSLYTLRDAV  
NRDAADYSLKATIEDGAIQITSLSTTAFTVEGESLGVHSSAILNPAGTEKGRATVFI  
SAPGSNLSEGDFVRENVGGIIDGLYSVSGAGANGFNVPDNNPLVFPALLAAGQIAL  
GAAALWQRAPGEKESITAGTITGVAGANITIDGGAAHGLANDDVIYVSGGTFEPGAGGN  
NITLPEGYVYVSGVAGNNFNVIATAIAAGAIAPGFNGVDLQFRKIGNDGAAYPNAATSGT  
FNSRIFNTNAIATNTITYHVGNHNTYAVGDIISLTGLGGPQLIDGITIDDNIAYKITAIG  
VGFVTFEVDATAGVAAAGATDITYADLAFVNTRTNNSRFFEFYFGIDQTKSQYDPTYNAL  
NEDKNLSGGANASFTYPLSVYDSLGSPLYRLMLRFALGNNEWTVELSAQKDEETGTYDIT  
NIKPGSNGLIRSGILRFDHMLQGTPSGFEDPVVQVRNNGSAPSEIVIDWENKLSAISK  
GTVSQTKNNDNNVEIISDQSDGAGNLVKLQISPEGYIVGTFDSGETRNLYQIPVALFPNLN  
GLEAGSSDTEYVNFVRSGLAKYVPGKSGAGKTIGSALEESNVDSTGELLKMKELSSAIAL  
NARMASSKHQSNKQILDELRS

>gene\_68|GeneMark.hmm|47\_aa|+|71358|71501 >NVVL0100001.1 Rickettsiales  
bacterium isolate NORP64 Contig\_source1382A\_460, whole genome shotgun sequence  
LVVCDKVARVSCKLRFELACGFAAIADARIQQNNMKFNFRKNYYDE

>gene\_69|GeneMark.hmm|1557\_aa|+|71491|76164 >NVVL0100001.1 Rickettsiales  
bacterium isolate NORP64 Contig\_source1382A\_460, whole genome shotgun sequence  
MMNKSSFLKLLTTASVVIAANAGSAFGEQKQTKEGEVAIIVVPGAGKNIQNSALED  
AQFNNKDSLLVKAGTKKVTVSDARVIASIGLNGENAVELALEEDVSVSSVVDLSESGKKL  
SVNVGAGKTFTLNKDLEGKFNLGGEAADIEIAGGNFSALDNIMLGTGAGGGVGTNLIDL  
IMTVDGEVDAAVAGSGLVHVNDVTFANLIGKTNVSVIEVADKVKVTLQKSNFTTIDMK  
GESEFVVENGVELTATAFTVEADKATVHFEGNSDVTVAKMQGAGTDGFKLVEIGGAVNFK  
TAAEYKAKETKLGDSASAEFSNKAALTLETFTTDTDKKGVVFAEGSEVFTFSIGAA  
GAAFELVEVGKDGRILANKDAKLYATSVETAVNETGEFILQGEGAELHANVGSSAKKFK  
NFGIAMTAAESTVLSNHIYVSGAVALSTNGKNNTLVMKEGAKIVGDIVSEDGKGTLLVE  
GVAAIDGFVGLDAATEKYTVNKQEINGGTIKALRFGKDGVLTVSKNRVNTREIDFTAGGI  
LNLTEDKVANFANGLNIKGLGSITVKNKATKGKEVKVETKLGESKDKMFTLFAATGGADIE

FTKSSYIKKVAIGAATLKLGEIDGKFLIGELVHSGDAPTL SITQNTTLLEGTNLSSGAKK  
LEAIQFETDKNLIVGKGVNLHTNKGFIAGNNDLTFEGGSIVDSVIGTKDSKFN SVTITE  
AGDISFLKEIFLTNNLTVDKAGTTSFGGDVTLTDLILTEGTANINANLTANQIKTNAV DK  
TTLNFSSASKAVIDSKVGDGVTVFKEVVLNGTDIEFKKTFNTKSLNFKKGLTATLSGLQE  
DGLKNTKITTEDAHKGILVLNKDNNQQFDEEVGTDKDKHFGIILKVADNTNIITINNFYS  
ALHTATAEKGRVNIKEDAVIGSLGEASDELENTFTDSASVLDGVWAKDIEIATGKKAT  
LSYIVASSNEFKLNKDSEAVFTGKSGKLDATVVASADGFGKMTFSQTLSMITKSIGTSAA  
KIAEVFTTGDADSRVTVLSADIFANEINVGKKHTIMLKNAIEMGGKTTFQSE SITEINAY  
KLTSSGDSALEEGAEIAFIFNDVDDHGQISVKGATTKLDADKKTIDVVVIDDKSALPVS  
EEEEYELFITENNGTLTMDGLKMNVKHEGNDFVQWTQKDAAITLLRNNVAKEKLVLVTDKN  
TAEAYGDATIKGDARDLVLTALGNMTTEERQKTLDSLTDLAKATTSVTSNTIAGTQNAASH  
ALQRRVDQLGISSGSDSSSAYGAWFSPFYGTTTQKAVKGAAGYKGSNYGGTIGGD LQTDS  
GLVLGLTASYAKTKLHKDAKSGD TTDVRSFIFGAYA AKQITDNWVQGDV SFGTNKFKN  
TENRFLSKVLTEKAKSKYSVNSFSLGMLAGYSYKIADAVVTPVAGLSFSRVGGVSYKEKG  
TSFINRDVKKTAVNVLEPMIGFSAHMTTDMDGIAITPEFHTSVKYDVIKSDAKATVTHSG  
LNKKILYKSKKAHQAKFNIGVGVNAVAGIYEGASYDLIAKKSLSHQGS LKVRVNF

>gene\_70|GeneMark.hmm|370\_aa|+|76355|77467 >NVVL01000001.1 Rickettsiales  
bacterium isolate NORP64 Contig\_source1382A\_460, whole genome shotgun sequence  
MEKIKLAEYIWL DGTQKPTSQIRSKSRVVSLLDSPNLNSPDL DSPDLSPDSDSLNLDDFP  
EWSFDGSSTNQAVGEDSDCILKPVNFVKDPLSETDGYLVLCVFNPDG SVHSSNSRAILR  
KALENGGADEDVWLGFQEYTMFKKNIPLGWPEHGFPGIQGPYYCGV GSEQIFGRDLARR  
HQTACIEAGIMYYGSNAEVMPGQWEYQIGYRGIDSE DAGALNISDHTWIARWLMHRLSEE  
YNIHISHENKPIKGDWNGAGMHANFSTKNMRDPQKGRATIKNALIQLESTHQEHIKHYGE  
RLEERLTGKHETSSISTFSAGNANRGSSIRIPRVADKGYGYIEDRRPGANADP YMVAAL  
LISTICSVSK

>gene\_71|GeneMark.hmm|489\_aa|+|78202|79671 >NVVL01000001.1 Rickettsiales  
bacterium isolate NORP64 Contig\_source1382A\_460, whole genome shotgun sequence  
MKNLESLKGGHNNSTKLETTDL SAVPSVEEQGRSQSGSGESNNNWSWRSFSWQGMVLGGV  
LAFSVYNFWKAVENRAKSREYKALEQLKSNLKKLSEECSDNNTTIEKLWQNMSASSFIKM  
LLDDIKKNYNSDPSTLAKILSDLEVNLYVYIIASYC NNYLYKCGHTGREEVRAELEFARE  
LLASKCNQTLDDL NAAALRGHPNFSELYIQITHILGR TFLYRDNTEADIENGIRYFEEVC  
SFGEQYQQMGGQKLFYLLSARNIGFMKLCQAEFRENEPID EPTCSTKKASLRSVIEEFK  
QLKQDAEEYTEFTFKDGELTRETIIIPANDAYNRLECAQRIMVCYYNLFLY GAREDELADD  
MREIKDLIGTKHTEEHSMAADIAHLRQTNLKKYADILNMFAKLWSALEGLALPEEVDMH  
VNELREIIIIGQVDSKLT SREEILQVAKDMSVKGSFPNLEALELLESCNSDQFEQLVDD ET  
PLAGEGESA

>gene\_72|GeneMark.hmm|220\_aa|+|80302|80964 >NVVL01000001.1 Rickettsiales  
bacterium isolate NORP64 Contig\_source1382A\_460, whole genome shotgun sequence  
MKLSEKACNQDEK FVVALDGPSASGKAIGSALAQEFGLVYVQSSIVYRGLAYICLQKGI  
SSGNTHAIK LSETEDVISEVRSVDLNF EKIGEFASEISVLPEVRRNLGEYLTHLIK TTP  
RIVMEGRDIGTIVAPNADLKIFITANVEIRAERRFKQLILEGKECTLGAVLASLRGRDAR  
DSSRSVAPLEAASDALVVDTSSLSPEEVVSKIKDFVACRV

>gene\_73|GeneMark.hmm|572\_aa|+|81067|82785 >NVVL0100001.1 Rickettsiales  
bacterium isolate NORP64 Contig\_source1382A\_460, whole genome shotgun sequence  
MTIKKRFIPQLADLTPSTEDFSELLKSVDTSHIKEGSSVVKGQVVEVGSEVIIVDVGLKNE  
GRIAVSEFQTAKGQALPNVGDVVDVYIERVASRRGTVLSREKAIREESWVKLEEVFKKEE  
HATGTIFGRVKGGFTVDLSGVVAFLPGSQVDVRPIKDPTSIMDIPQPFQILKMDRKLGN  
VVSRAILEESRSEAREEMLSKIKEGDVLEGVVKNITDYGAFIDLGSVDGLLHVTDISWS  
RINHPSEVLTFGQDIKVMVIKYNNAESKRISLGMKQLEANPWDDVVNEFPLGKTMSGKITN  
IADYGGFVELKEGIEGLVHSSEIAWGGKGNQNPCKLLSVGQEVFVILDVDTERHRISLSI  
KKCQDNPLIKFAEKNPVGTIIPKAPIRNITDFGMFVAIDERNDGMIHESDLSWEKSGEDLL  
KNYQKGDEVECKVLNIDIDKDRVALGIKQLTDDPYEGSTDTFKKNMVVTCEVISIDDDGI  
EVSVEGKAQGYVKKFDLSSERYEQPDRFTEGDRVDAKIISINKETRKLGLSIKALEIEE  
RAKVIKEYGSTDSGATLGDILGAALGEDSKKK

>gene\_74|GeneMark.hmm|101\_aa|+|82963|83268 >NVVL0100001.1 Rickettsiales  
bacterium isolate NORP64 Contig\_source1382A\_460, whole genome shotgun sequence  
MTKKIMFVEDLQNGWKLYGKMGNGSQLSCDRSRKLNKQVGWVFGFIQKNDQSI AFAYLIA  
DDSPEKSYASLRAKAAAKEKLIAMTNPYKSHSFLLVGNNGS

>gene\_75|GeneMark.hmm|442\_aa|+|83488|84816 >NVVL0100001.1 Rickettsiales  
bacterium isolate NORP64 Contig\_source1382A\_460, whole genome shotgun sequence  
LINYLSKAHGGEFILRMDDTDLVRSKDEYKENIKRDLKWLGLEWDSSFNQLSNLEEYEQ  
AKAKLIAKGRLYPCYETPEELDIKRLQLSRGKPPYDRAALDLSPEQIAIYEKQGRTPH  
YRFLVESAPIIWDMMVKGTVKYHGSNLSDPVIIRADGSMTYMLCSTIDDINFNITHVIRG  
EDHVSNTAIQIQMFALGAGGSGELVPSKLPNELAPSKLVPKSVVFGHLSLVKAKDE  
KISKRDGGFEISALRGEVPEPMALNSFLGLIGTSVQMMPHKNMRELIEKFDITTSKSP  
TYIRGELDLINHKLILTYDFADIQDYLAQNGLQQINEKFWLAVRPNLQKLSDIKEWWRIC  
HEITPAISKAPELMKIASDALPEEITDATWKEWTKAIMAASGKKGKELFMPLRLALTGME  
TGPELKNLLPLLSRQEILKRLR

>gene\_76|GeneMark.hmm|948\_aa|-|84998|87844 >NVVL0100001.1 Rickettsiales  
bacterium isolate NORP64 Contig\_source1382A\_460, whole genome shotgun sequence  
MTNKKTLNKLSSCCIAALISVNGTNVAYGGGKNTFRSEFLDQIRGGFQLKEASQQKGD  
REPSEAFDGLGKAISNSFKMIGDDVDNSDADSDSDSDSDNDHRRPAKNLLGKAIG  
EYVESKASPQQEATTTQTRISDVEQELKAIDNITFVRGNQIFHNNGRQVDGKTFGDHAGF  
IEAYKESTKKLLREKLAILNAQKNVTLPKNTHSAQTTEVEIKTPAVPPVDDHKAESINDL  
LRFAMMNRQVIQTGGKPPVPSVNSDKMEFTNMLPQQPITMEHLEAKTVEEAKKVTFAP  
ALEILHAEALCAEQADDLMLQRPITMEYLEADTVEEVKKVTFAPALEGPTQVTFEARRAM  
LNSIHNLKRDQEPEESTVSIKQDISDLQAEIARLAEI IAKAAGEERA AKLRSIVVSSP  
EHRNNMIQLHKEIKNAYDAKKRAEKEGVGEIPEDFAQMWDDIDPSTDTDEEILDNFEGMW  
SRLEASALEESPTEKLRVVAKMSKSTNSKMYAQMQAAKLATEAVARFTAKKRAAEKASR  
VAAARLAAAKLAAEFVQNARSAALGKGNTSDPRLGLVVVAREKFDQATSNLTLTKSKA  
NLKEKMKTALHATDDLQGMANTLDNATNHVEKAVFSAQAQAAHAAAGNVNMTLTAESANT  
NAASRLAYAYAAGDDDTGFTHGLWVKGFVSKGSLKDQYKMTNNGFTIGSDIEINDDTILG  
IAFTLPKTKVNYDKKFAMNSKISSHVGTIYGSHNFANHVVFVNGKFSYGGTVKTRKVN  
GIAKSKFKPTIMNIELDSGRSFM LGDGY SITPKIGCGYSAYSAPAYKETGASNDKISAAK  
RTAFNLKAGISLAKSIAFESGIMLKPEIHAYVEHEVGVKNKNQTIKHDGIWDIESKLHNA  
KNKAVKINLGSSLVK SANERVDCDFGYDFNKKAKFSSHTGYLRLRLNF

>gene\_77|GeneMark.hmm|42\_aa|-|88129|88257 >NVVL0100001.1 Rickettsiales  
bacterium isolate NORP64 Contig\_source1382A\_460, whole genome shotgun sequence  
MIFKSQHELWENILYIVHWHIAPKISSTRLFCQKFEAIMNIN

>gene\_78|GeneMark.hmm|192\_aa|+|88865|89443 >NVVL0100001.1 Rickettsiales  
bacterium isolate NORP64 Contig\_source1382A\_460, whole genome shotgun sequence  
MTQRYFSNMTSKVLVASPFAMRGTMFHESVIYVLEHRPEGAIGFIVNKPIINATPLSEVV  
KKLDLDIDADNLKLAPHVGGPMTEKGGFFLHSSEYTKNIVSTHAGSGLSVSSSDVLLRDI  
AKGVGPEYALFVLGYTFWEEGEMELEFENNLWIATEANRELIFSPDSGLKWGKTFQNLGI  
SSGGFAPMMANC

>gene\_79|GeneMark.hmm|246\_aa|+|89499|90239 >NVVL0100001.1 Rickettsiales  
bacterium isolate NORP64 Contig\_source1382A\_460, whole genome shotgun sequence  
MDFNPEPEGSLSLLGKWRAHSGRNNTHELLAILKGLSAGQIGKIMKVSEKIAKQNHQRFQ  
TYENLPEKPAIFAYVGDVYKKMEPGTFSLEDLEFAQDNLRIISAFYGLVRPMDKIKAYRL  
EMVNLKPGAPVKSLALMWQEDIAQMINEEIKTHPNKYVINLASDEYSAAIDAASLDAKMV  
NIHFREIRDGVLRNIAINSKRARGRMAGYIIGRIGSPEELKSVSALHYAFDAGLSDES  
FFFVNS

>gene\_80|GeneMark.hmm|882\_aa|-|90335|92983 >NVVL0100001.1 Rickettsiales  
bacterium isolate NORP64 Contig\_source1382A\_460, whole genome shotgun sequence  
MSKLTTEQIRTTFDYFKNNGHTHVPSSSLVPHNDPSLMFVNSGMVQFKDVFTGAEKRDY  
TRATSSQKSVRAGGKHNDLENGYGTARHHTFFEMLGNFSFGDYFKEEAIYYTWNLLTKEF  
GLDKSKLYITIYHDDDEAYSYWNKIAGFGDDRIIRIATNDNFWSMGDTGPCGPCSEVFYD  
HGEHIAGGLPGTPEEDGDRFIEIWNLVFMQFEQINKDTRIALPSKSVDTGMGLERSVALI  
QGVHNNYDIDMFRDIISHTESILKVAEAGEALFSYRVIADHLRSASFLIADGVMPSNEGR  
GYVLRIMRRAMRHAHQGGKDPVMYKLLPKLVDIFGHTFPEIKRAEEFISVLKQEEER  
FKTTLDRGLKLEEEASSIANSGLPGNVAFKLYDYGFLDLTEDILKRNKIKVDIAGF  
DKNMQEQRERARKAWNGSGESKTDSIWFDIMSEFGATEFLGYSLSAEGKVFTLVQNGKR  
IKQISEKGQKFTLISNQTPFYGESGGQMGDIGMISSSSCKIKVVNSLKYLGKVIGHICEL  
EGLISQNDEIKLTINVTHRNLHLMHHTATHILHAVLRDVLGKHITQKGLSLVAEDKFRFD  
ISHPAALTKAEIKLVEEKVNHIIMENSQVNTDLMSTDKAIESGAMALFGEKYDSEVRVVS  
FGTGAEKTPYSLELCGTHVKRTGDIGAFKITYEGAIAGVRRIEAVCGKFALASIAKD  
EELGNVMKSIKSNKADLLQKLTGLIDSKKDLKQLENLHMDRLMLSDSEINDSATKIKE  
ARVIYRQIDGVSPKMIRMAAENLAKKHDDLVIYTSKSGAKLSVLIASVSKPLSEKHNAQT  
IAKELAPLIGSGGGKPTLAQIGGGDVGKQLQKLDIIMRMLG

>gene\_81|GeneMark.hmm|516\_aa|+|93170|94720 >NVVL0100001.1 Rickettsiales  
bacterium isolate NORP64 Contig\_source1382A\_460, whole genome shotgun sequence  
MSSLSSSKLGLFVNILNNLFHKNRNLIIILIGKNGITVCALKHGKQLNSLFDLEDKSYM  
IGNFLKYYKFFYVFLDHDCKLKHEMTPVLTSMKPNQLDEFISNEYDPEDIVAYNVY  
DIDYQNGEVWNSCIASVPFNKHISKLLEYILNHSFKYSGMYFLSLEFETIINRILKSDN  
TNYANHLQIFAVVTQSSGIRVVVVKYKDIMAEETIEYPAGKSDMYLLGTIEQAVSDKVLF  
YKEYIKMGLETCVILLVEDVLVKKFSKLEFDNCTTVIVSRDEISNARKYREERFQDTV  
MELFNNFNSCIAFNKPLGAIKMTFINRVFFKPVIFLLGLAALVSIKYQTILVKKEIR  
ELNQKYTLSEYREVQKQHPDIENITTLVDLYNLQNLINKKMVSPHLKTMLIKSYRKN



VKITSLQWKVLNPTKIELSENQLRITMKIVYKGDANSMITGIKMLNEYVDDLRAIFPKHN  
FIYRRDAEEILQIANRITIPASVIIEGNTEQVKNAI

>gene\_82|GeneMark.hmm|210\_aa|+|94710|95342 >NVVL01000001.1 Rickettsiales  
bacterium isolate NORP64 Contig\_source1382A\_460, whole genome shotgun sequence  
MLYKLIHLKNIIFKVIYVIGLVLLFVLIPIFQESYEQALQRKEKSTKFLKSTALKLD  
SIMDFEDKILGVNNDYLRLIKNSGKIGCAQRAKLLKNLPLSEKYKLFEPMNISLLRYVG  
HESAFKTSNIKINLYVLEVNFTAANYNIILRILRDIYRMLPKRSNVADISVNVKVEGLTP  
DIISKLNDRAPGELDVKIKIYLREIVYEK

>gene\_83|GeneMark.hmm|393\_aa|+|95332|96513 >NVVL01000001.1 Rickettsiales  
bacterium isolate NORP64 Contig\_source1382A\_460, whole genome shotgun sequence  
MKNDIILPPGTDSPRFQEQFNALFADNLSENKNSIAMLLAIDYAARLSSKYKIEEHA  
CARRLKQYIGQKLVLGEEFSSVMTFFAVALTPEEWQEDMDQSRREKSQTKEALIDSITA  
QFGSLNSSQKELVRMFLQDSLSSKRSNGFEGEGTLKGEDGPERDGKLKEEGHLKGMANLA  
RDGRRLSQNNAKFTQENNIFHQKNNAFINFIANSDFQSIISAQRNEKRDKEILEFTK  
MHITKIMNYSRQLERKISSIKNIVEKSVFSASVLSASIGLVIGGLALPLLVVPAIAAAV  
KYSPAIGQKLSSSIVKNSSLIQEETEGLNKLKLSLSALNKGQNQGSLEHSGLKEDMKD  
LIQDIITKQVPRSEQPASGGDSSKKNKLDKMR

>gene\_84|GeneMark.hmm|149\_aa|-|96859|97308 >NVVL01000001.1 Rickettsiales  
bacterium isolate NORP64 Contig\_source1382A\_460, whole genome shotgun sequence  
MKHSAVETLVGFLVILVATGFFIFAYNTSNVAKAANSYAIFANFQNIIDGITDGADV KLSG  
IKVGYVENVTLEEETVFATVKLRIDSNDIPKDSRAIVSTSGLLGGKYIRINPGPSDYNI  
PDSGKIIFTQSALNIEDLIAKLMYSLTSK

>gene\_85|GeneMark.hmm|114\_aa|-|97326|97670 >NVVL01000001.1 Rickettsiales  
bacterium isolate NORP64 Contig\_source1382A\_460, whole genome shotgun sequence  
MSFIDNFCIRFFAKHVGSDRFGNKYYLGQKKNYLKAKRFVTYNGQPNGAKVPPDWHRWL  
HYSSDDLPEMQDAIKLQRMDAGGRICDIKYADISSASSKSSSTYSSWSPNQKR

>gene\_86|GeneMark.hmm|160\_aa|-|97671|98153 >NVVL01000001.1 Rickettsiales  
bacterium isolate NORP64 Contig\_source1382A\_460, whole genome shotgun sequence  
MTAPAMSASSTSLPFVEIYTDGACSGNPGPGGWGALLIFEDTQKEIFGYDIETTNNKMEI  
FAAISALNILKKSCRVNLYTDSKYVQKGITewiHNWQRNGWRKSDNKPVKVELWQSLQQ  
KIEKHEINWCWVKGHSNKGNDIADRLAVEGRELAKRKVK

>gene\_87|GeneMark.hmm|164\_aa|-|98159|98653 >NVVL01000001.1 Rickettsiales  
bacterium isolate NORP64 Contig\_source1382A\_460, whole genome shotgun sequence  
MLGIVHKVLWLSLQNEGMVNDQCFYVSFNTTSLNVIMSERLKQRYPEEITIVLQYQFRDLI  
VFDNKFTVNMSFDGIPETIEVPFDSLTGFVDVNFANFSLKFSRIAENAPSVVDEFAGRANI  
SKLKKHPSVSLKVTPVKSTKEPKKTAASVIQLDQFRKKHSDK

>gene\_88|GeneMark.hmm|36\_aa|-|98810|98920 >NVVL01000001.1 Rickettsiales  
bacterium isolate NORP64 Contig\_source1382A\_460, whole genome shotgun sequence  
VLSKEIIFTQYDTAGSFDLGSKKVNANDNNRYAVAA

>gene\_89|GeneMark.hmm|465\_aa|-|99159|100556 >NVVL01000001.1 Rickettsiales  
bacterium isolate NORP64 Contig\_source1382A\_460, whole genome shotgun sequence  
MLKKINDFVVKSLFLALLAIVSCNDSTTKSSCDNIPELEKLSNQGEVVSQANLASCYYK  
GEGVAKDFDKAVLWYRKAADQGYADAQNSLGNRYNNGEGVDKDFTKAVLWYRKAADQENA  
DAQHNLGNRYNNGEGVAQDLSKAVLWHRKAADQGNATAQNSLASCYYEGKGVAQDFTKAV  
LWHRKAADQGYAAAQNNLGYLYYKGEQVAQDFTKAAKWHRKAADQGNASQNNLGNRYSN  
GEGLAQDLSKAILWYKKAADQNSFAQNSLGVQYAKGEGVTKDLFKAVQYFTKAADQGNA  
AAQNNLKRKLLQFASPFCKIGITTFEEVEKMYKLTQSGSNKWSGGMMYNITPITQVDFT  
GINNINLIFDDNKIIQGLIAKFDKNKFHDLFLFLESKYNIVSKQIPYVGNKSAKFSMING  
TIELESMHLSGHTSLIFTTNKLKDKSFKGTQLEKTLKTQKEKSM

>gene\_90|GeneMark.hmm|959\_aa|-|100672|103551 >NVVL01000001.1 Rickettsiales  
bacterium isolate NORP64 Contig\_source1382A\_460, whole genome shotgun sequence  
MFGTDVGVDMIAVIGLILTLVVGFGQSGKIENIKEYALGGRNFSTGALIATVVASWVSG  
SGFSIVTTKTYGGGYHLVATFGMMVSLITAFYFVPRMGEFLGKTSIAEAMGELYGEKI  
RVIVAISGIIASSGYIAVQFKVFGDIVGYFSNSDRTLIIITGLAVTAYSAYGGVRSVTF  
TDILQFFTFCEFAIPLIGIMIWNKLYMVDSEFNMMTALEVDKFNKILVDVGNPQFWEIPL  
MIYFALPGMKPSIFQRISMGTNLAQIKKVFVSAFLIILVQIATAWIAFLVFSANPNIEQ  
GELFGYIVDNYTYTGLKGLFIVCVIAMTMSTADTEINISSVLFSDACAALNITPKSRLL  
LSKIFSLFLGICSFVALSTQDLLQIILSTASYMPVVSVLFILTIAGFRTSPKSALIGM  
SAGFFTVIIWRLAKIEMNPVAVAMFVNLVFLMGSHYLLDQKGGWVGKDKSFLEAQKLES  
IQKRQFFESIKNFNLVDFYKHAASDNLTYVGFYCAIYTITTMHSTEVENLLQDNGQI  
ILAIYQIMMVTGIVMAMYPLWPLNITNNIKERIIQTWWPIAIFYMMIFFSTFFVLVNGAN  
HLQPVVFAINMIIAILLWKTASVFIVGGVYLAVQFYKYYMGIDYVDISIGSPQFILMY  
SLVLIGTILIFLKPQEHLEKTEHQVGLAGEVGLTTEVNTLDTKVVGLNEKVVHISA  
RATDNAREVERLGATSQKILNNVSHLRPLVGNVINFASMMHDGLEKFSKEQLKTISKEV  
YQNSNRLSTMILNMLDLATLDVKKIELMKRKNVFSKLVVEERVESCRNIYVDSKPLKFKIN  
IEPGVIAPIDRNYIRQTIDNLVINAITFSETGQITISVAKQANFVTFVQDQGGIGIPASE  
IYDVFTPFKMASNTETKAEGRGVGLALCKAAVEAHGGKIKVESHGVLFRVVLPLNSE

>gene\_91|GeneMark.hmm|536\_aa|-|103855|105465 >NVVL01000001.1 Rickettsiales  
bacterium isolate NORP64 Contig\_source1382A\_460, whole genome shotgun sequence  
MLKKLLFCITLILLYPLSCAELQRTGQPSYGASLKAQNDLEYLGFSPKVNFDYQAPKL  
QEMLAKRSSYKNLITRILYLFYWDQNRNSIDATNESQELFKMLLAKIPDANYCYSYRS  
ASTEEMFFRWFINKPFVWHVERYEIFKSADLEGKTYQLPLWLVLKYPQIVKNDAYRKPLK  
VNTPYKIESLPEFTALESTLKRMTTEGRWETTSRITHYASNVNDIGAQHEIKRYMNINIL  
RILNYSNHTTEQNLKPIKFWGGKGLWNSLVYKDFVVSFEKTVIALQKFYQSTPYIIGYE  
QLNRNPLISEQLIRKILSSLVYDYAPIDDSDFGVYMMETGDEKSYYKIMKSVLGSSSSHN  
SNNSAGLKKADSRASNMFLSRAILNDFS AETIELIIRLYGGVNSCNYSETPLMNAASRPE  
ILRLLIKNGAKIDTVNTFGKTALFYAIQFGDYEAVKILIDHGADV NKALYNLETFFNNLSD  
NYELEQFFMLEYVADFTPLIYAKKYASKDVQNLKHKATLGKVDLPLIKEWINKK

>gene\_92|GeneMark.hmm|111\_aa|-|105617|105952 >NVVL01000001.1 Rickettsiales  
bacterium isolate NORP64 Contig\_source1382A\_460, whole genome shotgun sequence  
LIKVIFCYNMPGKLSYAKSSCARIFRSKLSAADLRLNSFLVYPYGEVAEWL KAPAWKA  
CLRAIVTRVRIPSSPPAFALASFSWQASFKFTRAKAARRSFSEGGLYPFYV

>gene\_93|GeneMark.hmm|272\_aa|-|106022|106840 >NVVL01000001.1 Rickettsiales bacterium isolate NORP64 Contig\_source1382A\_460, whole genome shotgun sequence  
MKNIMTKISKKLEGGKGIITGVANNMSISWAIQAQLAKAHGAEIALTYQGEVLEKRIFPL  
AEEIGCDFVQECDVTDEASMDRLFAAVKEKWGKIDFILHGIAFADKNELKGRYIDTSLPN  
FLNSMNISCYSLTALAKRAEPLMNEGGSILTLTYGAEKVIPYYNVMGLAKSALETSVKY  
LAHDMGGNNIRVNAISAGPIRTLASSGIGDFRSMKTHAATSPLKRNTTQQDVAGSALYL  
MSDLSSGVTGEIHVDSGYNIMGMNTPPKETK

>gene\_94|GeneMark.hmm|502\_aa|+|106903|108411 >NVVL01000001.1 Rickettsiales bacterium isolate NORP64 Contig\_source1382A\_460, whole genome shotgun sequence  
MFLTRKVSFIAGIICAASFAPVFFTPGIFALSVLCAQVSRANGVGQAAGFGYAFGFGFFL  
ASLYWICFGVAVYIDQFWWAIPFALFGLPAFLALLIAFQAAIAWQFRKCHYKYHLYHFF  
FCLIWAMEWFISWGFTGFPWCYIGYAFSVSDKMIQASSIFGILGLSFAAVYIGSTLYSK  
KFLILRLLTGGAICIALFAFGHYRLEQNPTVLSVVKIRIVQPSIPQTAKWDPDIFWGNLD  
KQIAMSQKPGSPDILWSEAAALTVYYYAPVHNALMSVFTKEGQVLLSGGVSDNGKQGAD  
YEVYSSLFAIDSAGENLFDYHKSHLVPFGEYMPGRKYIPLKKITHGSIDYTPGTRKTVYL  
QLFNLSVQPLICYESIIFQEVKISNSDADIVINVTNDAWYGNSSGPYQHFEISRIRCIEN  
GLPMVRSANNGISAIMDPMGRVLAKLELNQVGILDGYIPLKLVLPITYSEWGKVGVCSSWV  
SLVLILQSMIYFFFCLVKRRI

>gene\_95|GeneMark.hmm|103\_aa|+|108501|108809 >NVVL01000001.1 Rickettsiales bacterium isolate NORP64 Contig\_source1382A\_460, whole genome shotgun sequence  
MSDKKETKGRADNVDRLVSHRLKMRMMLGLSQNDLGKAVDVSIIQQVQKYEKATNRISSG  
KLFASFKFLKVPVAYFYDQSDSGNIIGSVLAEAEASSYSSDLK

>gene\_96|GeneMark.hmm|180\_aa|-|1|540 >NVVL01000002.1 Rickettsiales bacterium isolate NORP64 Contig\_source1382A\_922, whole genome shotgun sequence  
MFEKPLISFDFAIKFLKSKEDYEIIEGFLSALFVANNYKPVKITALLESESNKEAAHLK  
KSVADLIVEDTDGNKFIVEIERSFTPNFTHKACFNTARLISDSLSTSQDYSKIQKIFHIS  
LLYFETAGMEKPIYHGKTIVHEVDTEHPINIDIMNKGIATFENKNIFPEYFFISIPRFND

>gene\_97|GeneMark.hmm|334\_aa|-|929|1933 >NVVL01000002.1 Rickettsiales bacterium isolate NORP64 Contig\_source1382A\_922, whole genome shotgun sequence  
MSLLNAKSIYKPFAYPWAYEAWHTQQKIHWLPEEVPLADDVKDWNYNLSAGEKHLLTQIF  
RFFTQADIEVNNCYMKHYSQVFQPTVQMMLAAFSNTETIHIAAYSHLLDTIGMKESYQ  
AFMKYKEMKDKYDYMQKFGVETKEDIATLAVFGAFTEGLQLFASFALLNFPRFNKMKG  
MGQIVTWSVRDETLHTNSIITLFKTFVQENPEVWNEKLRSLYEACATIVHFEDAFIELA  
FEVGGIEGLTAREVRQYIRYIADRRLMQLGLKEIYLVDSNPLPWMDMMNGIEHANFFEA  
RATEYTKAATTGTWDDVFTNIDKGAAGKGQTAG

>gene\_98|GeneMark.hmm|620\_aa|-|1991|3853 >NVVL01000002.1 Rickettsiales bacterium isolate NORP64 Contig\_source1382A\_922, whole genome shotgun sequence  
MTMIKKKKFEIKIDRSRDDLLDFGKAMLKDRYLLKGEDYQDLFARVSSYYADSQEHADA  
MYKYMSKLVFMPATPVLSNGGTNRGLPISCFNETKDSLEGIVDLWENIWLASRGGGGIG  
SYWGNVRSINELVRGNGKTSIVPFLKVQDSMTLAISQGSRRGSSAVYLPMDHPEITEF  
IDLRRTGGDVNRRALNIHHGVVIPDAFMEAVENNEEWKLISPHTKKVIESVSARELWSK

LLTTRIETGEPYLLFIDSVNNNIPEHHKKLGLKVKTSNLCAEITLPTGVDHLGNQRTAVC  
CLSSLNVEYYQEWKDDAEFIPNIMRFLDNVLEDFIESAPESMSRAVYSAKRERSVGLGIM  
GFHSFLQSQNVPIESVMSKVWNKKIFEHIEEAANASSVMLAEERGACLDAAEVGAKERFS  
NKTSIAPTASIIICGNSSPGIEPYAANSFTQKTLSGSFTVTNKHLVKLLQDKGFNNEQV  
WSSISTHEGSVQHLNFLTDEKDVFKTAYEIDQNWLIELAAERTPYISQSQSLNIFIPGN  
VSKQYLHDIHFKAWKKKIKSLYYARSTSIQRADKVSHTVVQAQEMIDLEKKNNEPSKLA  
KSALPPERIENNYDECLSCQ

>gene\_99|GeneMark.hmm|263\_aa|+|4233|5024 >NVVL0100002.1 Rickettsiales  
bacterium isolate NORP64 Contig\_source1382A\_922, whole genome shotgun sequence  
MLEFINLFAKIIEFSHESLIVPLIIIGYIWKDKTFFHIGICLVLSMIFNAGLKATFQI  
PLSPALGKEGFAPSPGHMQTSIVLYGFLYKFSKNTIIVSLVILLTLIAMSLIYFGYHNI  
YDILGALFFGLMLIFGYVSIKSKMPESRFLAIIIFTTCCMLYIRLIYQISPHLWMAYYA  
LFGLLVSEYFFDNKQIKLDAKSKIIATIFCFSSLFLTNILFALLPNALSFLQSLRWFLI  
GFFIPFSVFLSYSIHCKGKAGDS

>gene\_100|GeneMark.hmm|848\_aa|-|5154|7700 >NVVL0100002.1 Rickettsiales  
bacterium isolate NORP64 Contig\_source1382A\_922, whole genome shotgun sequence  
MKTLLKLTWLTLALSLSGVMYAANNGQLNAATKHALRYLKSQGVKAKFSDFQFKDGV  
LTSSVLRRLRKGSAVTRITNFKLQTSLSGNWSAPIFSAKLNPAQTTLVGLQNDVQILNTEIS  
YEARMNLLSGDKDYNFVSNIKIDKFKDIDNNPLETGQAYYKYSSHDGEQIIDCKVQFGS  
TTYLNITNLDNKNIQIEAKNIPLMFYKLVQKLSPEHGLVNFESYIKNGHVTEASLVLDL  
AAETISEDLSFGNVALRGVDYQYSKEFPTISKMDINLDVKGGSLVFAIDRGYSSSILLYD  
GVIKMDWLGAEKTVLFIKAGKGDVGLVDFISESTHAETSKANIDFRKLGAEAFIDIDV  
KVPLKTSSVNIYNISADIQNVSLGIFKDSVHLKETTLSGRFDGDQVTIRGDGELNGFKSE  
LDFVYNIEDESGTGIGAEVAVGAKDKLEFDHKLDIKTYFKSAKMSGEDQKIGFISLMGG  
DSVVDVFHYTNKDSKGFINIESDISDLDLKLGIIHKKKNDKANLTVNGSFDDPTTGVFQ  
FSITGENKLSMSGEIAMENEEFTIDIKELKHKKTDLGSKIISKGDLLSTELHGEALDLS  
ADMMQLEKEQDDGGVVLKLSIKKVYLKDNIRLDDLEVDLECVAIQCTSGTISAMIGTKQ  
IEIFVTTDNGKEKWLIRSGNAGASLRGFGAYDAMRSGALSIDLTTDREMVKSGEIPILS  
GTFEIKRFVLGNTPTMARIVSFVSLPGMVNAILGNKDIVFSSMSGNFSEKNSILTIENTS  
AKGPFVGFSLKGTVNIADRIMDINGHVTPSLYGVSSIVGAIPLIGRIFTGHKQQRGLISA  
SYNIQDSY

>gene\_101|GeneMark.hmm|433\_aa|+|7879|9180 >NVVL0100002.1 Rickettsiales  
bacterium isolate NORP64 Contig\_source1382A\_922, whole genome shotgun sequence  
MKIAFIGTGYVGLVSGVMMSHLGHDVVCLDVDENKINKLKNKEAPIYEAGLDEYLAKYAN  
SPALQFVLGYDATIQDTCDFVTVGTPPKEDGDADLSGIFDAVQNACKYVRSECIVLKS  
TVPPGTCAQVREFMQNQGKTIHIVSNPEFLREGSAIKDFLEPDRIVIGAESEHAFEVMRQ  
IYKPLTDAGVRLIETDLATSELIKYASNMF LANKIAFINEMADLCEVIGADISTLSTGVG  
TDKRIGEAFLKAGPGFGGSCFPKDILALQQLSKKVDSDFLVLDVAVIKANSNRPGRMLKKI  
SKAIGGDINGKKFAVLGLTYKAETDDLRSAPIDLINLLQEKGGHVAYDPEGMVNADKY  
FRKLDCASSAMSAIEGADAIIIATEWEELKKIDLEQAKRVARKPVIIDLRNILCPKEVLS  
KGFYYSIGRKNY

>gene\_102|GeneMark.hmm|1149\_aa|+|9198|12647 >NVVL0100002.1 Rickettsiales  
bacterium isolate NORP64 Contig\_source1382A\_922, whole genome shotgun sequence

MTNKFHFRVQSSYSMLESTIKIPQLVELTKNNWMGAVCLADRGNLFASLEFALEASKAG  
VQPIHGAILNILFSNKGKDDFAEIVLIAKNDAGYKNLLKLASYTFTKNDKTCNHITFDD  
LEKHNEGLIVLSAYTAGIIGKFLQNNLPSAKNTAKKLQQLFGDRFYFEIMRHGSEKEKR  
IEDEYLQIANEFGIPLLATNQVLFSDVSMHDAHDVLLCISEGVVQEVQDRKRVSNNCYFK  
STAEMIALFKDLPEAIENTVYLAQRCSIMAETRPPSLPKFSNGEISEEVLIRDQAKAGLE  
EKLAQKIDKEHIKKADQAPLRKAYFERLEYELGIICRMDFSGYFLIVSDFIRWSKENGIA  
VGPGRGSGAGSIVAWVLKITDLPIEFGLLFFERFLNPERVSMPDFDIDFCQERREEVISY  
VRSKYGNERNVGGIITFGKLQAKAAIKDVARVLGLNYSTADYLTLPFNAVNPVTLSSQAI  
ADVAELKGAARGKGLYNLEGDNELIKQVLSTALTLEGLQRHSSTHAAGVVIANQDMTQIV  
PVYKDVNADMLISQYSMKYCELAGLVKFDLGLQTLTVITKTIKLEDSGVVLDIEKIPF  
DDKTKFKMLANGLSTGVFQFESIGMKSSLRRLKPDNINDIIALGALYRPGPMDNIPTYIA  
CKHGEQEVLDYHPLLESTLKDTYGVIIYQEQVMEIARKLAGYSAGTADLLRRAMGKKVKA  
EMDAQEEIFVKGALANKVSESDAKSIFATVAKFAGYGFNKAHAAAYGVISYQTAYLKANF  
PVEFLIAALNLDIDSSDKISIFLQEAKNANINVIAPDINESSGLFEIKNDNDNAKKSITF  
ALGAIKSVTVNFGNAASAVRMEKGNFKSIIDFAERIDPKLLNKRLLESTIKAGCFDKLHP  
NRNSLLQSVPKIMAYSAAYHLEQKSHQISLISVGSNGNDVLVDAEPLSASEIAYAEDVDM  
GLFLKNHPLSGLASSLKKCSIKDTDYIKNELPQGSHKLLAGIIVKKDARMSKRGLFVTL  
IISDPKGIFEVTIYNEDVFKNYAHLINVKPEVVIYCDILKDKGGLRTTALRFSSINDELQ  
GIQYNLTLSPKKPQDVEKIMELLNSRISQDKSNSSISVLLPVEEEFVAKITMPPCFRLNE  
EDAMKLSEF

>gene\_103|GeneMark.hmm|300\_aa|-|12830|13732 >NVVL0100002.1 Rickettsiales  
bacterium isolate NORP64 Contig\_source1382A\_922, whole genome shotgun sequence  
MDIINPRVDLAFKKIFGVEENKDLLISLINSIVGKEDQVADVTLNPNPQNFRQDKLSI  
LDIKARGIDGKRFNIEIQISDEADYDKRALFYWAKLYTEQLQVAEDYSELSKAIGIHILN  
FTSIPSSERYHNTFHTEKTSGLYFKDELHTIELKKFTPDSKEDLSHIVAKVKNSLDM  
WIAFLTRHDLKADNLPELNNKELKALNVLNVMNFTEERGAYEDHLKWL RVEANSLK  
KAEAKGHEKGLEKGLDEGRKLEKIEMAKTMLVQGLDIKLISKISKLSIEEIEDLRSYEVT

>gene\_104|GeneMark.hmm|52\_aa|-|13810|13968 >NVVL0100002.1 Rickettsiales  
bacterium isolate NORP64 Contig\_source1382A\_922, whole genome shotgun sequence  
VILKTLLAGLRSSAGGAIKGLCKSAGWDEDTYLDYINSVFLMRLPWVALL

>gene\_105|GeneMark.hmm|483\_aa|-|13965|15416 >NVVL0100002.1 Rickettsiales  
bacterium isolate NORP64 Contig\_source1382A\_922, whole genome shotgun sequence  
MSVPPVRSIPLFIGRENERLGLAHKKRAPGLVVIKGRRRVVGKSRLINFFASGRVKNKL  
WDFAGLAPQDGMDDQTQRDHFARQLAAHLKLPPTFQDWSDAFDHLSNHIKAGDIILLDE  
ISWMGAKDPSFISKLKAWWDKQQLPIMVVFCGSVSSWIEENILKSTAFFGRINLTITLAP  
LPIDEANKLLRASGFKGSDYDAYKLLSILGGIPWYLEQITPGQSADDLIKQLCFEKDSSL  
VLEFDRIFHDLFNGKGVSYKKILDALKDGMKTLADIRTIIEFPHSGTLSSLMEHLIAGF  
VQKQNLWSFKTTKPLKQSLYRICDPYMRFYLKLIEPQRNKIDLGAFQNTAIAQLPGFEAH  
IGFQLEQLLLQNRSLLLKAIGINPADIVADGPFQSKTASKTGCQIDYLIQTTTKNLFIC  
EFKFKRRELGLDITQLQEKANALKVPRGFATIPVLFHIGGVSSNVATDDYFYRIIDIAD  
FLQ

>gene\_106|GeneMark.hmm|340\_aa|-|15558|16580 >NVVL0100002.1 Rickettsiales  
bacterium isolate NORP64 Contig\_source1382A\_922, whole genome shotgun sequence

MISLNKDQIKKLLDIIAFSDASSCLSRASDIVINNTDIGFSLDITGITHAEAEELIRQKAI  
KELKNINNIGNINIVLTSSAPIKQGAKLGTKPGKSPSREKPKLHIDGVDQVIMVASGKGG  
VGKSTISALLGSKLAADGMRVGIIDADIYGPSMPNIFNLGKPELDGNKMIPLKNHGISI  
NSIGFLTAPSASISWRGPMASKALYQLLSLTKWGQLDYLIIDTPPGTGDHLSLLQNYII  
DKVFMITTPQKISEIDVSRAISLYQKFNIPISGIIENMSYHEPISGKKIKLFSGSAGEE  
ISKKHNPMLAQLPISPGLSTACDKGESLQPYAWLLDGVV

>gene\_107|GeneMark.hmm|382\_aa|+|16564|17712 >NVVL01000002.1 Rickettsiales  
bacterium isolate NORP64 Contig\_source1382A\_922, whole genome shotgun sequence  
LFKLILAIIFYKLTILVYEFSLFFTNLVLIIIMINKIYQFFSKSPWDDNGQEDNIFTQ  
KRKPQFNFDNFQDFSPKLLIGLAALIAVWLASGIYEVKEGEQAIVIRFGKYHRSGEPE  
LNYHFPNPIEKIIVAEVDKSNRLEIGYRSTGRARVGGAVSARDIASLMLTGDENIMEL  
NIDVMWHIKDLSHYVFNISDPEDTVRAAAQSAIREVIASIDITSVLSNKKQAIADRMEVL  
IQEILDQYESGVTIEQVKLLRAEPPKEVIAAYRDVQTAKADKENAINKAEAYQNDILPRA  
RGESAKIVQAAEGYKVEVSKAKGDASRFNAVYKQYVLGKSVTKSRLYLETIEDILQDAS  
ITIVGSGGVLPHMAINKDNLIK

>gene\_108|GeneMark.hmm|287\_aa|+|17722|18585 >NVVL01000002.1 Rickettsiales  
bacterium isolate NORP64 Contig\_source1382A\_922, whole genome shotgun sequence  
MNMNKLYITIFAAFAALVLLAGSLFTVDQRQTAVVFQFGEAVRVIEEPGLNIKIPLVQNV  
QYLDRRILNVVAEEKELTASDEKRIIVDAFAKYKIIDTVKFIKTVHTYAGANLRLNKILE  
SSMRTVIGRFPLVTLTEQRSDLMLDIRDLVHRETEPFGIQVIDVRILKSDLPHENSEA  
YNRMQTERYKEAKRIRAEGAEESARIKSKADKESQIILATAYMEAQKAKGQGDYEAARLY  
NLAYSKDPEFYKFYRSLVAYKASLSKDSTQFILSPKSAFFKYLQIGK

>gene\_109|GeneMark.hmm|491\_aa|+|18589|20064 >NVVL01000002.1 Rickettsiales  
bacterium isolate NORP64 Contig\_source1382A\_922, whole genome shotgun sequence  
MRYLRALFLILITLHFGAANGGALATAPVTTTPAPALSPAHSFADIVEPLMPTVVNVY  
TVRYNEQLKNRKAAGLPEIFPFKFNFFEKYNVPFSFDDLYSRPEAMSLGSGFIIDEEGY  
IITNDHVAGADEIYVKLTDNIEIPAKIVGTDAKTDLALLKIETKKKLPFAVFADSNRTR  
IGDVVIAIGNPLGFGGTVTTGISSKGRDLGEDLVDDFIQTDAAINAGNSGGPLYNIEGK  
VIGMNTSIADGGGGTNIGIGFAIPANTVQDIMKQLREKGIKRRGRNLVNIQEVTTTELAEA  
LSLKDENGVLIVDVNIGGVGDKAGLQRGDVITKFNDDIVLDSRKLKIFVADTNIGEEIKL  
TVIRGQNPVILTAKMVEFKKPSAAEIDSNVSTMQESGVTFSNLSPKLITKFLPPEESKGV  
LVASMQAQEASNELKIGDLVMSIDQESINNIEQFKQIYDKMGKTGKKNVLLVKRIIRK  
ESTMFAAFPIK

>gene\_110|GeneMark.hmm|279\_aa|+|20086|20925 >NVVL01000002.1 Rickettsiales  
bacterium isolate NORP64 Contig\_source1382A\_922, whole genome shotgun sequence  
MTEEINAMEEEANEVSSRDEISGRDDIAVLSFYFVNME SPEIMQQKILLAKKKCIKGTV  
LVAHEGFNGSISGEEELHVLIAEIAKITGADDVSSKVNYCAEQPFSKMKVKIKKEIVAL  
KFGDLVDENLKGDIYESADWSEFIKRSVTVTRNDYEVKVGTFKGAIDPKTEVFSQMP  
QWTKDNMGLLKDKKVAMFCTGGIRCEKSTALLKDLGVSEVYHLKGGILQYLEDTKNESGA  
WQGEFCVFDDRGAVSANLSPSDGFVWVGEQTAKGVSSSK

>gene\_111|GeneMark.hmm|204\_aa|+|20922|21536 >NVVL01000002.1 Rickettsiales  
bacterium isolate NORP64 Contig\_source1382A\_922, whole genome shotgun sequence

MILQREKICAIISDNSIISAIACENTTCQIDVVSSDYESFIDSKNKLDLLILDKDIYPHK  
LPLHRINCLINLTDQKFSDEIRIAKPLKLYDLLGIIASNMREEYFFCCINHEWIYHERR  
ARFISASREISLTDKENALVARLLSDKNFSAKKDSLKTSWNYHQDSESTTVDTHTLYKLLK  
QKLPAGMVEIRQSECLFKFEKVVF

>gene\_112|GeneMark.hmm|58\_aa|-|21736|21912 >NVVL0100002.1 Rickettsiales  
bacterium isolate NORP64 Contig\_source1382A\_922, whole genome shotgun sequence  
VEYTDPKVPEEKKEKELAQVMQDHMSKEDRVKFMKTVKDSYQEEAVTKRNTQIASQQIC

>gene\_113|GeneMark.hmm|244\_aa|-|22174|22908 >NVVL0100002.1 Rickettsiales  
bacterium isolate NORP64 Contig\_source1382A\_922, whole genome shotgun sequence  
MIDYTKSFSAKESKGFDAGLRSYMLKIYNYMTLALLTGAMAFGTLNFPPLMNIMYNIGA  
NGEFMGVSTAGMVIITFSPILIALYFFMGMGKMSVQSSRALFWVYAALMGMSLSHLGLVYT  
GQSLTRTFFICSAVFGSVSIYGYTTKKDLTSMGSFLMMGLIGLIVVSVINIFLQSPAIEF  
ATSTFIGVAVFIGLTAWDTQKPKAMYYASGGGEMGQKMAIRGAFTLYLDFINFLYLLRFF  
GDRR

>gene\_114|GeneMark.hmm|288\_aa|-|22963|23829 >NVVL0100002.1 Rickettsiales  
bacterium isolate NORP64 Contig\_source1382A\_922, whole genome shotgun sequence  
MPNKTSQNKLIALFRLTRFHLPTGYLLAFFPAAFGLLLAYEETPNLNYLPLFFVGSILAR  
SAGCVINDILDKDIDRLVARTQDRPIASGIITVTQAVIFLVLLFTGCLAILLSITSIA  
LGIIAFLMILLYPIMKRITYFPQAFGLVTFNMGLIGYAAVKDEVSYESMLLYIACGFWT  
FGYDTIYAFMDIKDDKKIGVWSSAIFEDKPYKLIAGFYVAFFVLFSIATQDSFGMYSL  
CTISFAVMATLWGASLDVKDPKNCLARFKANNYLGFLLFFVMLENL

>gene\_115|GeneMark.hmm|841\_aa|+|23891|26416 >NVVL0100002.1 Rickettsiales  
bacterium isolate NORP64 Contig\_source1382A\_922, whole genome shotgun sequence  
MTDFPKKYKFNDHEKKWQAFWQEQGIYLWDKSEARDNTFVVDTPPPTVSGQLHIGHVYSY  
THTDFIVRYKRMKGLNIFYPMGFDDNGLPTERLVEKKKKVKASQMKREEFVAICEDVVE  
EEEKFRDLFNSIALSVDWNIEFRTISKTCKISQMSFLDLMNKEEIYRDSQPMLWDPVDQ  
TALAQADIEDQEKTTFMNDIQFTTEDGDKITIATTRPELLAACVSVFFHPDDARYNKL  
KMAISPLFGVRVPLLADDMVDPEKGTGLVMCCTFGDQTDILWWRKHKLPKTIIFTKWGTI  
DGITFDDTCINKQQAQAEKFGAEITGLKIKAAAREKMIDILKAEGLLLAQTERTQTVKCAERS  
GAPLEILTTPQWFIVKVAHKEALAKRSDENWYPQSMKVKLDKWIEGVALDWCSISRQRYF  
GVPFPVWYSKRPGEEGKPIFAKLEQLPIDPALDLPEGYLRDEVEADKDVMDTWSTSSVSP  
QLSSHGIADGFMVDQKRHENLFPADLRPQAHEILRTWGYTMLKSHLHEGTLPWKNIMIS  
GWCLAEDKSKMSKSGNIIAPETLLEQHGS DVIRYWAASSRLGADTAYSEDVMKNGKRLV  
NKLWNAAKFVSQHFDPKIPDSKNLELGALKGKISCDFDKYFLLKSELVQEASADFENYE  
YALAMAKTEQFFWSLFCDNYLEITKS RAYDEESENPEGALSARLALYHGLKVLKLFAPF  
VPHITEELHQLLYSKESIHRHSWPKLDINFDEFAPHESESLIEVLDLVRKIKAKDNL  
KAPIEYIEIAGKLSDELVSDLNVTSSAKIKFVDRSSNAQELGSDKLNKINVKYDESGA  
A

>gene\_116|GeneMark.hmm|61\_aa|-|26900|27085 >NVVL0100002.1 Rickettsiales  
bacterium isolate NORP64 Contig\_source1382A\_922, whole genome shotgun sequence  
LFIKLAKTPGAQSVIVLIPMPAQMPTMMMISKNAEITISGLKFISASAFKVKPKILKIR  
S

>gene\_117|GeneMark.hmm|926\_aa|-|27076|29856 >NVVL01000002.1 Rickettsiales  
bacterium isolate NORP64 Contig\_source1382A\_922, whole genome shotgun sequence  
MEVKMTKQMDVSKDRDNRKRPVEVLGNVEQPPSKKIKRDIDEMIKLYKTAFAYRDKPEK  
KVYEILEKMHIRDLYQLNPVMTTEMYSVLAIKVSNYETKNHCLAKIKVGLSTIDPRALDA  
KNMLKVALLLERCIIQLSTHFNDSDNLRRTQLLDEYSALMRNLEPGALNDQPTLVIAQY  
GTLAQCYALLNARESULLVCEQLFNLCREAMVKISVVPESAWLLRSVYLVRALSTCESS  
GRKKLVDDNIETVIQILSFVSAFDRIDEKTALMSLEIINKLMIICSKTNAIISSTYSSNF  
LEREFAVIHF AEALTSIIHQ LADKANTSRVLT KTSDVMHAMFGHVMFLEVDHGVIAQYVN  
CWQQSLQKGTLDNPGSILDQVSSAINTALRSNQTVSIEPLLDLAWLLIQTTASNKITAGE  
TLYTLYSYLDMYLQAGQTEIFLNHFTAMLQMHIIQSVQTSKDYGLNAQFETFMSLCHLQN  
DRNMLLPLLQQLDEAFVEKLTNNPTQRLSHYFITS AIQYWNLGQHELAFGHLSRAMDVIE  
ITNARNEKVF CIFFLEFCRLYSIQSGDHMFSDKFNKYHEIYTKLPARERQADLRTQVNDI  
LAIINADTV DASSPLLSMRYEDNGSIIIDRALIETVSSFIKFKHNKGISFNHAPDHSRYA  
TLQDISANDREEIQRIAREMHRQIDDTLCVLNQSSEQWQEFAQCARWICPQLWVALRVN  
DANQLEWGRASWRIQVIFEQLITYSMMNHDI TGLKKISDILFTRLTKNQWKNNLSLECL  
EHTIDAFIFCQEGMEARCIQTIVQTPQLADERIDKLTIKLLALMPLSRPDEEDVQLLLL  
PQAVREYEILN NFLDRSDVLCVEDRQVNNALVTQYGHISHMLYQSLLSILLHDPTLPSE  
ISYILADYTYDSDGYNLAGALPSVCL

>gene\_118|GeneMark.hmm|287\_aa|-|30539|31402 >NVVL01000002.1 Rickettsiales  
bacterium isolate NORP64 Contig\_source1382A\_922, whole genome shotgun sequence  
MNNLQAKLDQLKWLKSSGVEYFCSTEKDSKNSLISELISNSSDKVEINEPKPVKSTNSVQ  
STKPLKSVIQNI MKETKTNTNPN SNILAAARALADKAENLAQLKEYVENFEGCALKKFAAN  
TVFADGVQDAKILLIGEAPGATEDEQGIPFCGESGKLLDKMLASIGICRTKNAYITNTIF  
WRPPANRRPTTEEIDICKPFVEKHIALMKPKLIILVGGTATASLLGKSEGISHIRKNSYS  
YTNQYISDPIHTTALFHPAYLLRQPMQKKTWYDLLKIKDLLKGLV

>gene\_119|GeneMark.hmm|322\_aa|+|31424|32392 >NVVL01000002.1 Rickettsiales  
bacterium isolate NORP64 Contig\_source1382A\_922, whole genome shotgun sequence  
MSKYTYTIPENLNGERVDKALSTLCQETSRSQIQKAIKNEKLT LNDQIISNLSARVKEND  
QVEIIIEITSELL PANIPLDIVYEDDDMLVINKSSNMTVHPGAGAHADTLVNALLYHT  
NHLSDVGGVEVRPGIVHRLDKTTSGLMVVAKNNQAHVHLAAQIESRELTRMYKALVWGLIK  
PTSGTIDKPIGRSRADRRKMSTFKTGKHAVTHYVTKKILHGGLFSFVECKLETGRTHQI  
RVHLSHMGHSIVGDQTYGNNSRKISGCPESLRPALLAMDHQALHSFYISFIHPKSGDRME  
FTKEIPLDYNKLI ESILNSQST

>gene\_120|GeneMark.hmm|247\_aa|+|32405|33148 >NVVL01000002.1 Rickettsiales  
bacterium isolate NORP64 Contig\_source1382A\_922, whole genome shotgun sequence  
MHKCKIFLVVIFSLILSSCEERDENVWVVGTSADNPPY EYMH DGRITGFDIDL MKQIAG  
HLGKDIKFKNMDFHGLIAALT TKNLDMIISGLSITPERLRRVDFSVPYTDAKIAVLYYTR  
DRFQKTSDLTGKAIGAQLGTVWVSLIAHDLSSQHRFSIKSLANNLLLVEELKNKQLDAMIL  
EESQAARFISIYPQFSSFNLEQYSSAFAVALQKKS PHTKNINHAIKALRSNGTIEALARK  
WGIIGAE

>gene\_121|GeneMark.hmm|157\_aa|+|33135|33608 >NVVL01000002.1 Rickettsiales  
bacterium isolate NORP64 Contig\_source1382A\_922, whole genome shotgun sequence



LVQNEEFKLA VGK FPTGVT VITTNQGS KLYGFTANSFASVSLEPHLISFCLNKEAYSFDA  
FSDAEYFSISILSSAQADISGHFARHSADKFKGV DYE L GKHSNSPLIQGAICFIECKKYN  
IFECGDHSIFIGEVIKTQIDEDKSPLLYFSKSYLEIK

>gene\_122|GeneMark.hmm|247\_aa|+|33605|34348 >NVVL0100002.1 Rickettsiales  
bacterium isolate NORP64 Contig\_source1382A\_922, whole genome shotgun sequence  
MSIIKIGLSGANGRMGRAIQNLLLDKTDK FELTAKITSSSSELDSLKACLDSDIIDFSS  
SAILPSLVKAAAQHGA KLVVGTGHAQSHFADLKD LAKTNAILYASNTSIGANLIAM LAA  
KSAKILKGYDVEIIEAHHKHKKDAPSGTALMIGQKIADAMNINFKDNAVFD RASKGKRID  
GEIGFASIRGGGIFGENEIMFAADDELVSISCRALSRDAFASGALIAAEWLSAQKAGFY S  
MEDVLEF

>gene\_123|GeneMark.hmm|1027\_aa|-|34821|37904 >NVVL0100002.1 Rickettsiales  
bacterium isolate NORP64 Contig\_source1382A\_922, whole genome shotgun sequence  
MKRALIILLIFQSQSAYASFWDSIGRCLKDPCNCGEKPITEYWGKQVIRPSVKKNKNCP  
PWDKYDGRSRYNCLMKKAMPGT FIESYKNL CGEKSPSSSYKTPRIRVRGQQCNALKCWST  
STSLDWDGDCVTLAGRYGLPLYRMCARIALPANTQTTPSIKADPGYTDGKHLDSKGKTQD  
DKYPVGKDGAPIKLSRPKLC LYLDP AFLSLESGLQADVMDIDPNWQPFHKTEAVHPHIIQI  
IKTFFKVFKDSASGLASISDLTASLGSSSDIATQSLSKAF EFLGTLIGIFGNAIEKLLD  
EVGAINRAVSSTKYGCVELPLGPMPPPFCSQISYFQLATLQKICQLDKDGKYEKSTNSSK  
CLVSAVRNNFVRNSVRVGYDHLVPLCKPGESPSHGTC AEINN LASTLTNAKALHEITKKR  
DIIKHCSAASSGELCAQTSIKHRCSVTEHGCRDGFRI VYAKKIGHNITPEPYFYDDL PNC  
TNNSPSACQVIWGIN TAEFADISLVFPKVSNSANIVSAIKHSFRLFDYGLD TDGSTPPKE  
NKFHATIVQQSHENQDYNFVQEPNQICLFGNKRMIDCTERVPAPQPLLS CNNVFGTNCKS  
SYFSPQATITYRSDDGRERSKQDVTSTLVVPETVYQSGGNRKAVAYLAGTQFEALV TDDN  
YAMNPFMNAPPLKDPTSILGTYLDNILPISLNPPYARNPYAVYMSGLEYISNKYHLGGKY  
ICVRNKNMRQCPDDIHM CVLAKLANKNTVKCSIFYKSTENHPGLSMCSPDQARNPSCGVI  
DFMPKISGGRVNIKKCADGALCYESDAELCTVGM SAAERSIPGAQFGETLATNQHYNPF I  
KDARGIVRIRKYNQNSLRRLRKT LRELGACTLISPDRQDTCSAQNNFSQDNGFASWTSV  
KVGEISTGTCKAGMKLFNPANPLKRLCIPVSE PAPP RFALEPLYRMKGTPPKKEYTNTKC  
VFDGCKVEGGFNAYWPAVKSGELSLGR CNLGYRVSTPQRRCVQKSPGVFVLSFPDRRG  
YCDRLGK

>gene\_124|GeneMark.hmm|818\_aa|-|37935|40391 >NVVL0100002.1 Rickettsiales  
bacterium isolate NORP64 Contig\_source1382A\_922, whole genome shotgun sequence  
MSSKASDNSLYNDSAADFVPVACHYDAHTLLTKNGELLQTIQIHGLLSEKISKNLFNLR E  
VVRNSISSTIECSKYAFWIHTVREKADLDDPAEYPNFFSANVHDIWRRKNYWHDKFVNKL  
YITIVHKGTELKLNLSNFINSFFQRRISSEESLEQACGELHKT VDSILSGLSEYGAE  
KLGTLIEGEECYSPISFYKHIMHLSNKDSTMPTQDISSVLASHQYVAQSDRMEVIGGGE  
QKQVAIISIKEYQEISSDALDKFMQTPVEM IATEIFYFVKRSDVVADFTVQNDTLNISGD  
SELRKWKGLDKIVDAEDNGIRFCHQQISFMVIGEDKETLDRDAIRASESLAQIGIVHIRE  
DINLEKLFWSQLPANFSFLSRMKPTILDNTAALASLHNFP MGNQYNPWGRATLLRTEKG  
TPYFMNFHDQTGKGSTCIFGNRKSGR TLLN FLLSEMDKYRPSIMYITDDMDSGLYIKAK  
EGRWFQREKNIINPLICEDTPENRVFMLEFFKIISKHYFDPLTNAEMLLL TLTSETVFTL  
PGQERSLAELLKSLKESDKGGKTLKKRLAAYAENGIYHGVFEREEAINIEEGEIVAMNLQ  
NFDAAAYSKAHYPKEKRLIEQFEYDLNAMRAVKAGIVLAAQNIMKVIGDKPKIFVMDNLA  
EIINLKHYSFLMSTLMNMMHAMNGIFVSTVNTDKLYSLYGT KLTQNANSKTSQDWIRELN

TSFFLPSELSVAGLEEILDLSAELRKLARLTPASRMFLIRQDGTITSELSIGGLIGLT  
SLLCSGEQERELYREIKNEGNDTTEKWVQALCEACEN

>gene\_125|GeneMark.hmm|284\_aa|-|40655|41509 >NVVL01000002.1 Rickettsiales  
bacterium isolate NORP64 Contig\_source1382A\_922, whole genome shotgun sequence  
MSKNQTIIKKVKKIQQGGGHHGGAWKVAYADFTAMMAFFLLLWLVSISDKATLQGVAQY  
FTPTESISDKAGLGFGGGTDNLTGQLSEYAAASSLIYGSPSKGHRVDAAKAPTSMSDV  
EKEHFISIMQSIQKSTELQKYSENIHIDLTNEGLRIQIMSDNRPMFKPDTTELQPYMLK  
IIDIIIGKMVSTQPNYISITGHTASVPEDAEDDIDFWYISSERANKIRQYLVENLINKNQV  
VKLVGKSDREPFDPKDPFSVRNIRVGITLLNNSVVSAYQKSAPR

>gene\_126|GeneMark.hmm|289\_aa|-|41519|42388 >NVVL01000002.1 Rickettsiales  
bacterium isolate NORP64 Contig\_source1382A\_922, whole genome shotgun sequence  
MFYIIGVVIVFGSVLGGYTMHGGNLAVLNQPNVVIIVGSAIGSVVIGFPMSYLVQSMKG  
MKHFFTAMPYNKKDYMELELLFSFNTFKLMKIKGMLEIESHIESPEESELFKLAPVLKGDH  
FILDFMADNLRMTMGMDNPYQFEDVMDREIDLYKEHTSVPGDLFTNLGDAFPALGIVAA  
VLGVITTMGSIMEPPDVLGALIGAALVGTFLGILVAYGFASPMGHFLHKYGAYQVKFADC  
AKVGFVSYLNGNPPIIVIEFMRKAIPHYRPSFEELDVYINENAMKMMG

>gene\_127|GeneMark.hmm|158\_aa|-|42429|42905 >NVVL01000002.1 Rickettsiales  
bacterium isolate NORP64 Contig\_source1382A\_922, whole genome shotgun sequence  
LSESNFNNKFMRAALIEAEKAYAAGEIPVGCVIVCKDTGQIIARAHNIMQKNNNPNMHA  
EIIAINHACGQLGNKSLSNCDLYVTLEPCTMCASAINARLACLYYGASDPKQGAVEHGV  
R FYTSNSCFHRPEIYYGLYCEESEELMKGFFSQRKSKI

>gene\_128|GeneMark.hmm|299\_aa|-|42892|43791 >NVVL01000002.1 Rickettsiales  
bacterium isolate NORP64 Contig\_source1382A\_922, whole genome shotgun sequence  
MFKLDENDLIRSASYASVIAIIIMVVKMYGWLATDSQSILASLVDSFLDISSSLINLIA  
IRVSLMPADDTYRFGYDKFQDLAIFSQSIFFFASSLFTMFSSGKALYIGAVPANVALGAN  
VMYICIFLTFILVLYQSYVIRHTNSRIIAADKLHYFSDFLTNIAIVISLYLSATFWYLDA  
LAGIGVSFYIMFVSYQLFRDAIHNLADEEFETEDRDRIIKIISFSETKGIHELKTRSAG  
SKPFIQFHLELDGSLSLLEAHYISDRISDALIKEFPKAEITIHQDPEGFEHEVNYVERI

>gene\_129|GeneMark.hmm|155\_aa|+|43894|44361 >NVVL01000002.1 Rickettsiales  
bacterium isolate NORP64 Contig\_source1382A\_922, whole genome shotgun sequence  
MKSISKLLIFTIVSLQSCQNMNKQGGGTLIGGAAGALLGAQFGKGSGLVAVGIGALA  
GALVGGQVQKSMDEYDKKLENSRQALEFSPSGRPVEWKNPDSGNRGSITPTKTFRERG  
RYCREYTQEIVVGGQKQKAYGKACRQPDGNWQIIK

>gene\_130|GeneMark.hmm|232\_aa|+|44567|45265 >NVVL01000002.1 Rickettsiales  
bacterium isolate NORP64 Contig\_source1382A\_922, whole genome shotgun sequence  
MNTLVEFKLSKSFDKKILIDNVSFKLNKGEITTLIGQNGAGKTTLAKIILGLEGYENGE  
VIIQKGLKIGYVPQKLDGFGNMPITSSGLEILAPKYSKSDFSKFAEFINLDSIRKKDIS  
EISGGQLQKLIIAATLLSRPDIIILDEPTQFLDVASQQEFYKIIARLKVLDLGLTFVMISH  
DLFTVMKNSDQVICLNKHVCCSGKPAEIDSNSDFKNALSEIGVYIHNHDKH

>gene\_131|GeneMark.hmm|296\_aa|+|45272|46162 >NVVL01000002.1 Rickettsiales bacterium isolate NORP64 Contig\_source1382A\_922, whole genome shotgun sequence  
MLENTIEYQINFWQAIAAHYIFPEGGFATTKMSGADTNLLILTKQDLQTLKSILPEVTS  
FFEKHQVPWGINIVDNPHSAEISFLEEKHFSKIYQHQMETKLASLPQTPGSPLVREVG  
DGDLEMLKDWTKPVVSGFKIQGSKDADLYYKLNIEALSREDNILKHFVLYDGAQPLSSAT  
LSIHGDVARLDNVSTMVEAQRKGNRGRALVEYCISKARALGCKYIIFESSERGINLYRKM  
G FKEVAMSCVYSASKSSEFSANDPSACSASDSLVCANESSESSASNPLPRNGSKSS

>gene\_132|GeneMark.hmm|255\_aa|+|46159|46926 >NVVL01000002.1 Rickettsiales bacterium isolate NORP64 Contig\_source1382A\_922, whole genome shotgun sequence  
MIIILAISVLIGLIFAPLGCLVLWKRYVYFGDGLAHASMLAAALSLLAGIPIFYAGILNT  
LLFALLIFKLKHKSGNNAIGLTSSIMLSLALILSYIFPGEFNFSSLLFGDIVAATGDDV  
LILCALLASVLVFLALTYRDLILILSKDVARSKNIKVQALELVFLSILSFAVLSTIKIV  
GALLVTSLILIPAMTARIVSTSPMMMIGFAIFFAQLMNFAGIMLSFYADIPFAPIIILCG  
GGIYVMVLLWKNCR

>gene\_133|GeneMark.hmm|203\_aa|-|46938|47549 >NVVL01000002.1 Rickettsiales bacterium isolate NORP64 Contig\_source1382A\_922, whole genome shotgun sequence  
MSDFLTFLTGVGIGAGLIAIGAQNFAVLKKGITKSHIFIVAITSVIDAVLIIFGICGL  
GDFISENEQLLQITKYGGAVFLFYGARFSYSSYLTHSLADEAQSKAGDLKKTILTLA  
LSELLNPHVYLDTIVLLGSIGAQMEEGERLYFALGAVCASFMWFFSLAYGAGHLSRFFKSS  
ASWKILDACIGVIMWSIAVSLFV

>gene\_134|GeneMark.hmm|446\_aa|-|47652|48992 >NVVL01000002.1 Rickettsiales bacterium isolate NORP64 Contig\_source1382A\_922, whole genome shotgun sequence  
MKNFALIILLPLFLVSCDNFGTTRVKNLIDLTPRLEVESAQKIKFSNARELLLDKAKS  
FKLAKREIIPAIKGVMSVSDGKGYVSAFSLKEQKILWSSDIKAGELDRSFSAGGVLF  
SDDKLYVTNSSRFLVILDAKTGHEIIRKEFPDILRAKPIMATDRLLLVQTISNQLLAYDI  
VSSKLVWLHEGGIETISTRSAAPKVYNGHAIVSYSSGEVVYLDVTNGKEKWVYNLSTID  
DIGFPSFDPSVIVTEPIIHKNVYFATSNAKLVKLDLSNGAPAWIRDADDIQSMSLINNT  
LFVTNARQAAALSSHNGKVLWVGNMISEKDRSGRPKTAFQAPFVSKTPNGFAVNIIA  
SNGELYQFATGLPGTGLPGADLSGIDKSGTDKSGTDKSGTGKPAHSVPGQLPVQPKI  
VKGVMYHWISCCNGKMYLMTNRKVQY

>gene\_135|GeneMark.hmm|216\_aa|-|49077|49727 >NVVL01000002.1 Rickettsiales bacterium isolate NORP64 Contig\_source1382A\_922, whole genome shotgun sequence  
VADLLDEVLDARYEKNLLFRKFLPFVIAVSVIIAISIASYGWYQNKISKHNREIGDVF  
VSIMSTKHDKKSSMVDLHELVASGDNKQJELAEKLAGELINSKNKKPALEKLEKIISN  
KGYEVTTSFARLLWVGVLVLDQKKVSDANKIKAIDYLQYFSKDTQVFFASATLMKALFYK  
KNAQNDLAIEYANKLLQLKDASLVIREQARAILANI

>gene\_136|GeneMark.hmm|234\_aa|-|49775|50479 >NVVL01000002.1 Rickettsiales bacterium isolate NORP64 Contig\_source1382A\_922, whole genome shotgun sequence  
MIFNRKMTRKILLICIAFSAGGAIADSKSYGPIIHRQSKQIQELKDRISGLENLIKDLQ  
EDLIQSGIVTKQFSANLEGAGSKDFIQPATLPARKNFFTDKENSQPKDRSDYDYALAAL  
KDSKYLDAEGQFASFIRNYPTHRLOSNATFWYAETFYRRGLFSKAAINYLRYSKYPKGA  
KAPDALLKLAYSASLNKGKEACSMKKLDLEFPKRPIGSIKRTMEAKTKFLCN

>gene\_137|GeneMark.hmm|484\_aa|-|50533|51987 >NVVL01000002.1 Rickettsiales bacterium isolate NORP64 Contig\_source1382A\_922, whole genome shotgun sequence  
VNIVANIILYRYFMIEEVLKQAITQNLVADSYKKHIWNHRKPAMAQVQQTSSQGFLRNK  
EFIEFASASLEFLRNTNADISIFNKFGTQFFSNHQKMKVKEKNDHLFTHEKILLYLDEY  
FLKEYTPDNAFAEAYMGRTVSSLIIPRAILTEKNDIKYEKSFITTYVPIINDSNGNFSVDG  
VMKITRDITNEWTVIYLERRIFSAFLIVFLVFFAIVLYNTSRAQRIINKQIETNKALVE  
EKAKAEMENSAKTDFLANISHELRTPLNAIIGFSEILAQTYGKIANDQYEDYVGDINAS  
GKHLGIVINDILDLSKASANKLTIEEAELDLSKMLLSSMRVFKPRADKANIQLVEQIPSQ  
HIVIIADQKRLKQALLNLLSNAVKFTPAGGVVTLVSKKDVIKKLVYITVEDTGIGMNDKD  
IPKALAPFGQVDNSTRKYDGTGLGLPLTKKLVLMNGSFDLQSIPEGTKITITFKYSG  
IIEI

>gene\_138|GeneMark.hmm|250\_aa|-|52252|53004 >NVVL01000002.1 Rickettsiales bacterium isolate NORP64 Contig\_source1382A\_922, whole genome shotgun sequence  
MKFVKSVKTIFFIAILSITSISFASENYASANEMTEENDYDANYEDTTALLFKIRGFYM  
RAPSKLESPLKPKQAGTSAPSFIAQNGFGFDTSTTYFFNNNLAAEVSGLARLQLKNSLVN  
EFAKAFGTDPASSSKNNIFLVPLAITAQYHIAPFGAIRPYVGAGYHATYMHLSKAMKVS  
SGHGAVLQAGVDIAFQDDTFFTLDIKQYFLRSNLTFFKDFLSPGIASAASVKSrvKWDPL  
VISLGFGFKL

>gene\_139|GeneMark.hmm|292\_aa|+|53254|54132 >NVVL01000002.1 Rickettsiales bacterium isolate NORP64 Contig\_source1382A\_922, whole genome shotgun sequence  
METKLSRYFIGVSWFILSLVSSSINDVLAKYLGMRLLHSYEITCFRFAFGTLTLLPFIMYY  
GTSTLKTSRPTVHFFRGLLLFLGIAGWYGLTLAPVTTATIVTLTMPVFLVVLGVFFLSE  
NIIWQRWLVTVAFCGLVVALNPNADDFNPEVLIFVFAALAFSSLDIVNKIFVVKESMIS  
MLFYSAIITALLAVPFAYQYWITPTEELALLFVLGASANLILFLLKAFVADATALAP  
YRYIELLISATIAYIVFTEIPAESTVWGALIVIPSTLFIIYSEKQELSKKTN

>gene\_140|GeneMark.hmm|425\_aa|+|54197|55474 >NVVL01000002.1 Rickettsiales bacterium isolate NORP64 Contig\_source1382A\_922, whole genome shotgun sequence  
MNRKRLITSGVANSFEWYDYALIGNFAPILGKKFFPDADPSAALLQVFLVFAVGYLMRP  
IGGVFFGIIGDKFGRKSALSTAIMCMAVPTAAIGFLPTYETLGISATILMVIFRMLQGLS  
MGGALTGSIAFVIEHSPKEHRGALGSVAMSSICIGILLGSLVAFATQNLFTTEQFEDWAW  
RVPFIIGIAVYFAGIYIKNNTKETPLFEEAKAHCEIAKTPLRTAFRYHWFDMLMSFFINA  
TGSVIFYIEAIYLASYLKINRGFPESDVGILITCCYIIMIFVTLFAGWLSKIGRRKIFI  
LNLLFIIAVIPFLMEVMENGTFTAVIGAQVIIAIIAATYIGPEPALQAEFYPTSIRNTAL  
SISYNTGTSVFGGTAPYIMESLVQNTNTITSSVYIITCAFVSLAALYFYKDKSSYDRAK  
AIDDT

>gene\_141|GeneMark.hmm|1024\_aa|+|55519|58593 >NVVL01000002.1 Rickettsiales bacterium isolate NORP64 Contig\_source1382A\_922, whole genome shotgun sequence  
MTAKIFVTKLVDEKEVVKLLPLSRFHKAEQRLVESHGKKLVEKIKSDRHFSIEEFLHRY  
SLSDAEGVAVLSLAESLLRIPDNKVGMEISDKLSNKHWEYSYLFKRTKSFKTFLAAFGLY  
FSGKFTDLVKSEGIISNLFERAGRRTFINIKSSILFSLQEFVFAENMEEAIEKSSGRKY  
AGNDFSFLLGESSRTRAQATIIYYREYKRAIKLISEAFPYNGEKLEERPNSVKTALHQ  
RFELEKFDDEKEFLPQIIDLVCEAKNNLTITFDAEESSRIDVYLLFLTKLIRHPSFKD

YDGISFVVQSYQTRCYEIVEYILSLAKELGKKIPIRLVKGAYWDTEIKHAQELGLEFYFPV  
FTRKEYTDMAYIACARKILENDEFLYPQFATHNALTAASIIELAGDKEYEFQKLFMGMA  
LHSELANHRKVRIYAPVGN TKDLLAYLMRRMLENGASANFVSKVNSTEISMNELVHNVSD  
NALHLLDLNKNITLPENIYPNRKNAMGYDLGYKTNYDYIQSKVASYFDNIYVNGSIIKGG  
EIIHTKRGREKFCPAKKAKEKFSSISSSTESEIKEAIDVAKSAFDGWSAVETRRRAQIEN  
IAYSLEENKFELYALLIKEGGKSIHDAINEVIEAIDFCRYASQAQIIMQEKKLPGPTGE  
SNVLSMHGRGVFLCVSPWNFPLAIFIGQIVAALAAGNSVVAKPSGNTPVVANFTVKLMHK  
AGIPTSVLQLIITGGSTFNKYAISDERIAGVAFTGSCQVAKEINRMLANRESGIVPFIAE  
TGGQNAMIVDSSALLEQVTDDVLTSAFYSAGQRCSALRMLYVQEEIYNDLLEMIGKATES  
IKIGDTSDFSIDTGAVINEAAKQKLEEHVKNMRGKGFKIFEHPLGKLEDGHYFYPHIIE  
VKSINDIPDENFGAILHIAKYKSKHLDKVIDDINNYGFGLTFGIHSRIEEKIEYIRSKVK  
MGNIYANRSITGAKVESQPFGGEGKSGTGFKAGGANYLLRFMTERTTTIDMTAFGGNVEL  
LSQN

>gene\_142|GeneMark.hmm|950\_aa|+|58976|61828 >NVVL01000002.1 Rickettsiales  
bacterium isolate NORP64 Contig\_source1382A\_922, whole genome shotgun sequence  
MFGIEVGVDMIAIVVVFLINLGVGLYGGVKNIKDYALGGRNFSTATLTATVIASWIGG  
DNFSLYLSESYTEGLYIYLSSFAALGSFLIIGYVYAPRMGEFLGDLSIAESMGKLYGKHA  
RLMTSLVGFILITMVS LQFKIASTLLSHLFGVSGVYTTIASGVIVILYSSLGGVKS VNF  
TDIVQFFTFGTIIPVIALIVWSGVDDTETILHTIENNPLFDINLLLDYNTPRFWSFLTLM  
LLFLIPGFGPSTFQRMSMSRDTQQMRKSFYAAVAVMTVQLLISWISILSKEPNLDSA  
NLFAYILEEYSYTGKGFIVGVLTMSMSTADSHLNSGAVMFSYDIANTLNLIKKGQELL  
VSRISTVVIGSIALFLAIKFDNLFDFIFGYSFYMPVVTAPFTLAVLGFRTTSRSALAGM  
ISGFLVALGWMFLDTEVDSVIPGLLANIVVMFLYHYLFKQPGGWTKKHS AKTTCSMKQCF  
KNYLCKIKEFDVLAYCKQNLPKNESLYIVFAVFAIVSIFSTSYSIPTEIRNQYPSLIHGL  
YFSTLVVAVSFLT FPMYKPLCSKNVLSILWAFGLFYILVFVVGLLVIISNFGQLQLMMF  
ILSIMVLSLLTRWQMALFLMVTGVISAIQFFKYAGVENFTSDFGSLEFKVTYVMLLIGS  
ILIAFFKPKQEHLEQTEHKVGTLETEATTKDGKITILNKEVGHYSERVSDQAKEIERLGA  
TAQKILNNVNHELRLPVGVMNFAEMLRDGLGKFSDEQLKMISEEVYTN SNRLSSMILNM  
LDLATLNAKKIELKKEKVNFSKLVHERLQNCRDIIAQDKKALKFHLNVEDDLMVFADINY  
IRQMIDNLVINAINFSEKGTIAISVDREKYFVSFAIRDEGKGIPKTEIYDIFTPFKMGSN  
TESKAEGRGVGLALCKSVIEAHGGEISAESRPIGALFRVFLPYGEVKEGK

>gene\_143|GeneMark.hmm|176\_aa|+|62018|62548 >NVVL01000002.1 Rickettsiales  
bacterium isolate NORP64 Contig\_source1382A\_922, whole genome shotgun sequence  
MTKLRVLTVPDPILRQKALPVRSDDEILKLMDDMLEVMYDGGIGLAANQVGLSKRVLVV  
DIRENSYDEEVENADLYPLCIANPEIIESSEEMEELGCLSLPDQRIMVIRPVS IKLRY  
LDRDNKQQELFADGLLARVIQHEDHLDGKLLVDYLSKMKKDIAMRKLTKLKKISA

>gene\_144|GeneMark.hmm|313\_aa|+|62586|63527 >NVVL01000002.1 Rickettsiales  
bacterium isolate NORP64 Contig\_source1382A\_922, whole genome shotgun sequence  
MGTDEFVPTLEYLANLKDPN DKYSYRAHRISGVFTPPPKPKGRGMKLT KSPVHEAALA  
HEIPVYNHTSLKTYAVAELIDFIDADVIIIVAAAGLIVPKNLSAKKYGSLNIHPSSLPKY  
RGAAPIQRTIMAGESISGISIIQMDEGVDTGDVILHEPVAFDARDNFKQTYDKCARISAV  
LMAKVLSEIDTLPRVKQPEEGVSYAPKLTKEEGQINWNDDSFKIDCMVRGMNPWPGVYFH  
HEGKMIKILSAIYNKSDHYAPGQIINDDFEVACGSGTLRIESLKPEGKPEMSAKDYLRG  
AVSMKSGTILSSK

>gene\_145|GeneMark.hmm|340\_aa|+|63528|64550 >NVVL01000002.1 Rickettsiales bacterium isolate NORP64 Contig\_source1382A\_922, whole genome shotgun sequence  
MQKTLQISKTTMKKTALSGIQTSGHLHLGNLGSIKNWLSMQDEYDCYFFLADLHSITVD  
ISPEALRASTMNSAAIYLASGIDPKKSTIFKQSSVKEHSELAWMLNCITPIGWLKRMTQF  
KDKAGKKQDSASTGLFTYPILMAADILLYNADVVPVGGDDQKHLELARDIAGALNRKFGQ  
EVLKVPEPMIQGAATRVMSLRDGTTKMSKSESEASRINLTDSADVIMKKLKKSKTDSIA  
EITYNKADRPEVANLINIFSALTEQSKEAILGEYEGKGF AEFKTDLAEVIIAKLAPINAE  
YQRIMQDPAYINQTLLEDGAARARSVARRTCDAVAQGFGLV

>gene\_146|GeneMark.hmm|292\_aa|-|65068|65946 >NVVL01000002.1 Rickettsiales bacterium isolate NORP64 Contig\_source1382A\_922, whole genome shotgun sequence  
MKNAAVPYDSIYRMNSNLSLLGNFRPLNLDLTSLDSTKQYKELGQRVLQHSIMDSL  
LEVYKILGYEDWEAARGRLSSVPIGLRALEEIQHKDNAVTPEQHPMLCASILRKASNIA  
GDCGKTKSSLDVDSPLIPRVDAGVNNIMNAYKDEVLQMMVSMFSSEELQQAMGNIFFKAF  
GGEEVSGNNLVSFANPVALLKAQGCKVFAHQHEYDSWIVEQQVLEAAQQQALEAAQALEA  
AQQALEAQQALEAAQQALVAPPEQEQEQLLGLSGVSGVSGVLAWWYGDDA

>gene\_147|GeneMark.hmm|424\_aa|+|66154|67428 >NVVL01000002.1 Rickettsiales bacterium isolate NORP64 Contig\_source1382A\_922, whole genome shotgun sequence  
MALFINFIPILLFVGIFFGSLYFSFMGVDNAFYQVPPTAAILPSIIVAWLMNRNLEKGA  
MPSFLD GARHPDIIMCIIFLLAGALSSVTQAIGSVQSTVNFALSIINPEYLLIGFFIVS  
ALISTAIGTSLGTVAALSSLMVELATKGAFSVEMGAATLVGGAIIFGDNL SVISD TTIASV  
TSQGADLKEKLNKLVKALPAAAVTIMIMLSIGGEVNITEAGGDYSLILIPYIVLITLA  
VMGISVFAVLI ALALAGAIGIYADYSLIAYSQDISAGFHMHEIMLLAILVGGLSGLS  
NHKAKAIVEALTKLLPKDAGRKSAELLI AFMVSVFDALLALNTVAIIFCGEFAKEISLKY  
KIKPHESAVWLDVFCVQGIIPYGAQILLVCAIAEISPLVVIGKVYYCYVLAGVTLSFI  
LLRK

>gene\_148|GeneMark.hmm|392\_aa|+|67602|68780 >NVVL01000002.1 Rickettsiales bacterium isolate NORP64 Contig\_source1382A\_922, whole genome shotgun sequence  
MSKIRKITQRFSATFPNATSLIKPPLPLFERGPWEHLTHAGVPHGQFWSQDYVGLNTHS  
KMHPLKWAFLRGDRKDARELLASGENPNIPAAQQTPLHIACEIGDVEMVHAALAAGADV  
NAQDAKLNTPLLIAFRYPNYHILKTLLEARADPFYKGEHYQTFHAWAASASSLGAGEFS  
IIMELIQNLGTDLAAQYVNAVDFGRTPMHGASMAGNTEAACQLAEIGGYIDITDRGGR  
TPTHMAAYNLHLKTIKALAQLGATHNPLD TDGKHPIYAVLLRLMQDHSKEDLKQAEIIR  
MLAPGDDINAITAGKTYLQRATEMQNLLL VKALLELGADPSILSNDGWSWSDYFFGESVTP  
TETATKTGNIAILLALQEAQETGLSGD TDGDS

>gene\_149|GeneMark.hmm|114\_aa|+|68975|69319 >NVVL01000002.1 Rickettsiales bacterium isolate NORP64 Contig\_source1382A\_922, whole genome shotgun sequence  
MARVTVEDCVEKIPNRFELVVLASRRTKDIAAGFPLTIDRDNDKNPVVSLREIAADKIDI  
DLLREKQIANLQKNNQVDDSSKENLYAQTKESDEEGLDLEESDIFSDVALDED

>gene\_150|GeneMark.hmm|149\_aa|-|69427|69876 >NVVL01000002.1 Rickettsiales bacterium isolate NORP64 Contig\_source1382A\_922, whole genome shotgun sequence  
MKNRPNIRIKQLSFWNVWLWMAYLVIRCRVYVGEFKRPLFREYSSLDLGADHFVLLKGNK

VIGIARIYKQEMVEFGRIAIRPSSRGQYGKTFIDLLISEVKDRDKVRIISLFAADHRL  
VKFYRHFDLENGEVYFGMLPFMNMIFL

>gene\_151|GeneMark.hmm|992\_aa|-|69873|72851 >NVVL0100002.1 Rickettsiales  
bacterium isolate NORP64 Contig\_source1382A\_922, whole genome shotgun sequence  
MQNKPCNPRVMRLLLVFGILLTIKCRYMLFGVDLAIVISFLVITLLIGLSHRRGIKSIQD  
YALGGRNFSTGALVSTTIATWVGGGFFFIVLSKSYSDGLYFLFAASGMVTSFLITAFVFI  
PRMGEFLGKTSIAEAMGDLYGKNIRIVTAGAGIIGDIGALAIQKAFGDIIFSFLGMP  
SYISTIGAGVVVTIYSAFGGIRAVTFTDVLQQLSTFCIAIPLVGVMIWDQLNLEGFNIINIAI  
SEKFNYKEVFSFSNANFLQAIPLMLYFAIPSLKPAICQRIVIGSNVAQVKKAFIISAAIL  
IFMLFIMAWISFLLFSVNPNLKSDQLLGFILDNYTYLGLKQLILVSVMMAMAMSTADSVIH  
VSSTLFTNDICTPLKIGVKRELFTKIFAGLLGVVAIILALVTQDLSILLIASSFYMPV  
VTAPLIFSILGFRSSTKSVAIGMGAGFITIVLWKIAGIKMNGIVIATVVNLIFLLGSHYL  
LKQKGGWVGKDRSYLDELKIEKEAIRAKISKRLREFSFTSYIKNISPISFAYMRLGIY  
FVIYFTTMYSIDTGVVTNDIQIILAIYQIMMACGILFVYPLWSHTLENKFPQVSWFV  
SVFTILIFFSSFFVMVGNFTPxxFxxFxxNxIxAXxxxxWxxAXxxIxTGxxxxxxxKx  
YMXIDYIDISIGSPQFVxMYILMLxGTVMIIFxKPKQEHQKQTEHKVGEExSxEVGEVLTV  
xSxRDXQISTLDTKVxGLEERVDHYTERTxNxxQExxRLGAXAQRIxxNxNxxExRLPVGN  
VxxFxEMLHDGLGKLSDEQLKMLSKEVYKNSNxxxxMIxNMxDLATxQAKKIEExQIKLAN  
FxELVEERxAXCxKxYVEEKPxxFIIEKNVMVxMDENYIRQxIDNLVINAINFSEKxK  
ILVxVxxQTNFVFTTIKDQIGIPLxELYDVFTPFKMGsTxXKAEGRGxGLALCKxxVN  
xHxGxVKxESSxAGVLFrvVPLASDRGRPRS

>gene\_152|GeneMark.hmm|50\_aa|+|72846|72998 >NVVL0100002.1 Rickettsiales  
bacterium isolate NORP64 Contig\_source1382A\_922, whole genome shotgun sequence  
LHKCEDASTNNDPGYSREPGLNGGFLRLKLWIITTQKAPALTMCSVYFYN

>gene\_153|GeneMark.hmm|257\_aa|-|73120|73893 >NVVL0100002.1 Rickettsiales  
bacterium isolate NORP64 Contig\_source1382A\_922, whole genome shotgun sequence  
MSGHNYNLLDENGVSHKYAIPINSLETVLGQGVTYRLQSDDLAYEAKRHLDTEVADLV  
VVYHEYQEVKNTDIYKTDVCSGAVLDNERSIAWEFLINATIYNSSTAAYWAVHTMLSGN  
GAERNLFLEKFLIALAKENASTPAEFALLAREAAPSTFFAKLAKTCADHTANITNLVGEI  
NFTYGDVIALFQVYREVLKCNDSYDGSFDNFYPEHCGRASGMFINSIKFISLQTDSDGMD  
IVDLIGVEETDCCCVIQ

>gene\_154|GeneMark.hmm|368\_aa|-|73910|75016 >NVVL0100002.1 Rickettsiales  
bacterium isolate NORP64 Contig\_source1382A\_922, whole genome shotgun sequence  
MANNSEKTLKNIHQQLDTRLNDVQTDVAVMIRSFQKDLANMNVQDLASLKSASSFRAS  
TLSPEVAGELELLLTSITEFSAKLEAEKMIEERIIQEELKHARNSGVSAEEVREYERNEK  
LAGVIAVRVDDYFKYKEELFSEQRRELDLFLNALSSGTETSIEDKCLYLGDNCNSAGLRTKM  
GLAERRQIDRQDQAMEMWRHLPSVNEHNQRKIDAVDASLQANISQPVREHLEQERKQLQT  
TLERGQQALEGIDKLLAGESKILDKRLKMMKLGILPKKGGEQFLKNHYLVFEEESRVNPN  
ATGVERCKQLAKAADIDLDAKSEAELLRSARRTGRQVRGSSSENSKTANQSASVVSGLSI  
KKVKPKSR

>gene\_155|GeneMark.hmm|489\_aa|-|466|1935 >NVVL01000003.1 Rickettsiales  
bacterium isolate NORP64 Contig\_source1382A\_1001, whole genome shotgun sequence  
MLKKINNFLVKSISFLALLTIISCNATANPSCANIKELEKLSNQG DATSQADLALCYDD  
GEGIAQDFSKAAKWHRKAADQGD AIAQYNLGVQYANGEGVTKDFTQAVKWFKKAADQGDT  
TAQYNLGVQYANGEGVTKDFTQAVKWYRKAADQGYADAQYNL GILYANGEGVTKDFTQAV  
KWFKKAADQGYADAQYNL GILYVNGEGVTKDFTQVVKWYRKAADQGD AFAQYNLGVQYAK  
GEGITKDFTKAVKWYRKAADQGHADAQNNLGVLYTNGEGVTKDFTQAVKWFRKTADQGH A  
FAQYNLGVRYAKGEGVAKDFTQAAKWYRKA AEQGCALAQNNLGIQYVNGEGVTKDFTKAA  
KWLKKAVDQGYAL AQNNLGVRYVNGEGVTKDFTQAVKWFRKAAKQGYAL AQNNLGVQYAK  
GEGVAKDFTQALKWFRKAADQGNADAQNNLGVLYTAGKGVTKDFTKATKWYRKAADQGNA  
TAQKNLKLK

>gene\_156|GeneMark.hmm|890\_aa|-|2092|4764 >NVVL01000003.1 Rickettsiales  
bacterium isolate NORP64 Contig\_source1382A\_1001, whole genome shotgun sequence  
MRIEDFKEKYNYP AATPVMRQYLDIKFSNIECLLLFRMGDFYELFYEDAITASRTLGI AL  
TKRKGSGERAIEMCGVPHHALENYLNKLL EEFKVAICDQMETPEEAKKRGGYKAIVNRS  
ITRIITQGTILEESLLDAKEPNYLV SIAIDKKGNAGISSVDLSTSEISVISVPEREII NE  
LARIRPKEILLSEQYRSGELASVIGTQLDMRISFQVDSFFSAKKCEKNILDFYQISDLAA  
IGQLTMEQISAVGSIIEYISLTQKANLPKLPKPKILNYNKFMSIDASTRRNLEINAVLSG  
GVRGSLSCIDNSVTKTGSRLNSYLSAPLIEIDAINKRLSVTKFFYDDIPLTEIIRKSL  
KQTGDLERCLTRLNMGRGTPKDLLSIKYTIEIAEQIQAEFVAKKGVTLPENIEKITQPLL  
GMSSLHDLIAESIRE DAPNIISNGGIINRNYHPKVAELHDLIENGQDAVEKLRDKYRQET  
GIDTLKINNNVIGL FIDITARHADKILGENFIHRQTTANSIRYTTKELQELESNMVNAK  
LLVVSLEQEIYAKICMELVDNQQLLLALAGSISLLDVYCNFAIIAHENNYCAPELSDDMR  
FEIKAGRHPVIENILKKS AESFMHNSHLSMDERVWLITGPNMSGKSTYL RQNALITILA  
QIGSYVPASSAKIGVVDKIFSRIGAGDDL NKGQSTFMLEMLETSAILAQATHKSLIILDE  
VGRGTSTYDGV AIAWSVLEHIHDKLRARCMFATHYHELVAMEDILPALANYTVAIDDS DG  
RILFLHKIKKGSADKSYGVHVAELAGLPKSVIRKATDLLKFK EKDSVKSSKELMRGESYN  
MNLFDMA SENAPPSKYQELAEELSTLNPDKLSPREALDILYK LKETANSA

>gene\_157|GeneMark.hmm|227\_aa|-|4816|5499 >NVVL01000003.1 Rickettsiales  
bacterium isolate NORP64 Contig\_source1382A\_1001, whole genome shotgun sequence  
MTSSGYRGKFTRVKTAKRRKPSSTRWLKRQLNDPYPVAKAQLDGYRSRAAYKLIEINEKFN  
ILKAGANVVDLGAAPGGWSQVA AKIIRSDAASAKNKLIAIDLLPIGNIAGVISFEKDFFE  
DGAKEMITDALDGR LADIVLSDMASNTTGHSP TDHLRIMDL CENALVFALTILKPGGHFI  
AKIFRGGAE GDFLSMVKQNFKKVKHFKP DSSRKESSEFYLI ALERKE

>gene\_158|GeneMark.hmm|158\_aa|-|5503|5979 >NVVL01000003.1 Rickettsiales  
bacterium isolate NORP64 Contig\_source1382A\_1001, whole genome shotgun sequence  
MLKAQLNTK SISRIAAIQTMYQYEDGENDIDIETLLLKLIDFYKNEDIKSDYELDSKSKL  
KPRPSYNHLKELVKFSHENLEEIDAI IETHLTKEWTLQKMPKLLTATLRVAICEIKYFPE  
TPRKVIINEYTDIASDMLDEGEIGFVNSVLDHYSTKKI

>gene\_159|GeneMark.hmm|243\_aa|-|6121|6852 >NVVL01000003.1 Rickettsiales  
bacterium isolate NORP64 Contig\_source1382A\_1001, whole genome shotgun sequence  
MNQTTFPFSSGNDYDPNEYIESSSNKAAYNALMHWP EFAGVEPYARVLIIEGAKSSGKTF  
LARRWAAKSGALFIKKMHELTENIIANHS AFIIIDDFDESWE EEEKLLHFNIIHEHSKYLL



ITTRKLHEASLRETSRLRERSLHEASLPEIKLPDLSSRLNASNKISIELPDELLKILIFK  
LFSNRSVVIGADVVEYLIKNLAREFQVIINSAEAINKFALENKRKITIPLVKQVLLAEKI  
QIA

>gene\_160|GeneMark.hmm|347\_aa|-|6868|7911 >NVVL01000003.1 Rickettsiales  
bacterium isolate NORP64 Contig\_source1382A\_1001, whole genome shotgun sequence  
MNKVIFWCASLLIGGLMYVLSSTIAPFLVALMFAYLLQPSIETNCKRFNLGRPIVTFGV  
FILFLSSFVTVIVLVVPIIFKQFAMFLGKIPQYKDNFEASVTSWSARLNDIDPELADKVS  
DSLQSFINTAFSMFASLANHLWHYTLATINFFTFVALMPIILYYFLRDWPKIIKAIESML  
PKHGKSKIREIFTSINQLLSAYIRGQLNICLMLALYYIIGLEIIGVDFALLLGVLSGFLI  
IIPFICALVSFLLVMVSCYFSFGYGVVELLYVTLFFIGHVSVEGYVLAPKIIIGDRIGLHPV  
WIIFAVFACGSLFGILGVMFAIPIAGIVKVFLSHLIGYYKSTQIYKN

>gene\_161|GeneMark.hmm|406\_aa|-|7912|9132 >NVVL01000003.1 Rickettsiales  
bacterium isolate NORP64 Contig\_source1382A\_1001, whole genome shotgun sequence  
VKTQRVQNHIIYNNKAKSTSLAPAADAAQAANLACPSSLAHCFLIVFALCFPPQSFANT  
GVISEIFIEASGNKHEARIKAHELGMQRALFLVADKINIPTDDLSPVPYEDLRQVFKPI  
TIADELSLSEKYIATVTYSYDQGKLYNLLLEYGNEEINDLFYEALIIPVLKQGITLNVWN  
DDKKWHDIWGEHRDSLNEYKIFYPEKTYLENKINSANLRELNYYDDFTKIFHGKLFKKVI  
IISGEFFTNRRATAKSLLRVRHYAHGQEEESMITEKDYDLKDWSDIANTIDLIVTKLIDSE  
GKTRTTEPEEMAENEDVFHNPMA DLKQIMMDIDVFDQEELDLVTAKLAAVKEIESFKISH  
SYESRYKILIYTSSEYALAEGLYLNGLSYKIHGNLYNLIDIKKGG

>gene\_162|GeneMark.hmm|251\_aa|-|9150|9905 >NVVL01000003.1 Rickettsiales  
bacterium isolate NORP64 Contig\_source1382A\_1001, whole genome shotgun sequence  
MEKEDNGSILDDVFEKINKGEAPGEFVDFVDNLENPTFVSESENAPEGAGAENTDKTES  
AYQENASENVSSNQNEGARAQAESSYQSEETTQNPQDARTREELLA EIDSLKDKVLRGLA  
ESENIRTRAAKSSQEA REYAIFSFADLVPVIDNLSRALEHLPENLSDDTKNIVEGVKMT  
KQELESFAFKHSLDSISPHSGDKFDYNLHHAISQIVTEDQEEGTIVNTMQMGYKIKNRLI  
RPAAVVAKGS

>gene\_163|GeneMark.hmm|866\_aa|-|10081|12681 >NVVL01000003.1 Rickettsiales  
bacterium isolate NORP64 Contig\_source1382A\_1001, whole genome shotgun sequence  
MSKVEVIMAEVITDKAKTPEVTMAEVITDNDATTSITPFLIDDTMKTMSKNFLAQAQKVS  
EGFLFIKNQLLECPPEQLEISLHQFNVA SSVAGSLGIRAMVQDGNLQTLILLAKKLPDI  
IKSMFGIEASFLIETLNFKKPPPTDIEPAQDVADRELARPSNTEPTTAERLPKNVEDLLT  
YLSYTVRFHDSEILFSARQKECVKLSFLHIAAIIIGNKIILKHLITVGREEGATNGMSSTT  
RVDYKHNNVIHYLELWGHKDVEKALLGDFSELNPLRGHANSSGNPKAITPSNAYA AFK  
KNIMSRVQGYEPLKVLTTTEILMAPQEETPPMELEQKVSPDMPQVQLEASTTAPVIITESS  
IISYYFRMLLSDNVEESCKLLPAVANGLVALLNLTNDINNSTNRHIAHNYLCYLGKIIS  
IYGQTEGKLLDKVTNLCAAWGNHEPLAQFWILSAEKESFTPRDRVKYMLKAQSAIEGCTP  
ETKVNIFYKLRSSLTNEHASNNALKKALKIIEDNGLQPNLTELAQIIPFQIQYCIQHPNT  
PGSSIDKALELARLMDDKFQTELGCSLNLYCLYVNLMLGDDNAKHTVKQAISEMDVSTEH  
QTAQKLYAPIVHEISKILISDLPENSRDLDTKLIMIALNILLGAAKYNEEGLELAQTYS  
QKLAEHPQYADEQSA AASEYPATDIGISSYLYLFKLLTNTSDEPISQSALDTPPNLSRAH  
RELCEEVSKLIQFVRSLSGATRLPTYLDHLSTTGSAAFNDLLGNSNPDYESSLPEPQNNL  
ETAIDNSVQRFQGLLLNILENPDWYVIPNELLRVNDSLSSEYEAPPSAPPEEELIQLPN

PDVPCAGDAAAGAGSDSDTGSDSVSV

>gene\_164|GeneMark.hmm|612\_aa|-|13005|14843 >NVVL01000003.1 Rickettsiales  
bacterium isolate NORP64 Contig\_source1382A\_1001, whole genome shotgun sequence  
MTHSGTNSAITSNDYQNLVSSMQAERKSPRDYDQGGDNIEKALESMEARKFAIALLMAS  
AKNMGIPGDGSDSNQASEMMQISRGIAEMQATEAEILATKALIEVQKNPAVNLMDLKDK  
IVDYDDSTRNFQGKPIFSYDISHSEKSESALIANIFTIRDAQGNTVKTVSQPGKAGSHE  
FIWDGTDNKDQKVPNSEYSISVESHGKIVNGTRIPFAVEATTNLSGIVESIKIEKGVAN  
SIVINGKPIMRDQISGVREPEEVEADLSLTPDLIGKYARLDLDRAQVKDGSMDVVFHNHT  
EHSGVLSVQIYDENDKLLKTITSTEQAGSGMGKLTLDVLENGDYNLKIHLRSEQLDQD  
IRLNSIIDVAVAGINPREGNFMSARENSFSPHNIQFIVGNLNPQQRQAEYTNSEIVY  
RDDGFIFKGGNPMFSSVAKKPOEDGSILSHVDMRIYSADGNSDLVAIVRGEYDLYSMLD  
SDSAAIVDNWDEQDPIAKNRFIEDGLLDGGELHLEEEYENSYKDNVVSVDFTWNGEFMGA  
DDLHASEGQKFQRTTPIYIKEDGTIYGGETMIPTKNAFALSVDQAEGELTLNLANGQKI  
PEELVMDSRKLK

>gene\_165|GeneMark.hmm|544\_aa|-|14859|16493 >NVVL01000003.1 Rickettsiales  
bacterium isolate NORP64 Contig\_source1382A\_1001, whole genome shotgun sequence  
MSAAVLEREVILPTRHKSGGNSASYTRKNESGEFKNLLETRTNASTSRSSSHERKAPRET  
TREAELQTTSEKTAETDFENTSATPSPEQLPMLSTSQHARGKEDALEEPPDLEDDDL  
ENTELQNAGLGNNDLENNTLKDTEEQLAQEAQNHPEFTLASAAAEPATPSLHNNAADALN  
AANMQQAQLSDGEIARAQHSKATTHIAEIAENIDITSLKLGSDQATEAQRNQKASEAIN  
LTELTKLKVPSQNPAPANPSGDAEPILSPKLLLAEESSRGQTVLSQISSNTRPSRS  
EQAPIASSAAETALPSAVKPELANLNSNGGEAGTSARKKPATQLPTMTEKSENVFQISFQ  
DNIPRNTNALSALGANITHTHPPKPAQIALAVNAAASSGTNGAKEITINLFPDALGAV  
KVEILSAIGQDGVSKIQSIKIIADRRELEILEKSRIDLEKSLKEVTDTKEEASLEFEMN  
QQGEQQRGGYFESLEERANWMSKFADITSEDAQDSDPRNIPNELLSIPASTGYVTKYSV  
NIMV

>gene\_166|GeneMark.hmm|218\_aa|+|16779|17435 >NVVL01000003.1 Rickettsiales  
bacterium isolate NORP64 Contig\_source1382A\_1001, whole genome shotgun sequence  
MSAQLIELVIFAIAFFIINKLIAILGSTSDDDPTKRNSFFGENNSMKDVTDTGTASTGK  
ERATILRPFAKKKKIELGLLIVAENEKDIQAGLSELLEKLPANIKSFVKNVKSFAQMI  
IEASNEEDDSNLKELVDARYTEAFKAIASSYGEYSAKNEQLTAQISEIFMFGNNAFVKMLF  
SGKNITSKTSMDNEEWTFKSTLNSSPVWQLTNIDRPQ

>gene\_167|GeneMark.hmm|79\_aa|+|17616|17855 >NVVL01000003.1 Rickettsiales  
bacterium isolate NORP64 Contig\_source1382A\_1001, whole genome shotgun sequence  
MKYPFLMIKFYQFFISPWLGKSCRFPSCSEYAKDAIIMRGVLYGLYLSAIRILKCQPF  
SDGGYDPVPEKRSSRNGSE

>gene\_168|GeneMark.hmm|605\_aa|+|17938|19755 >NVVL01000003.1 Rickettsiales  
bacterium isolate NORP64 Contig\_source1382A\_1001, whole genome shotgun sequence  
MKGVEIVKSYLANAPESPGIYQMLDEDKNIIYIGKAKNIKNRLSQYTLKLSVKNTAMVAL  
IRHIEYSITESESAALLLEGQLIKKFKPKFNILLKDDKSFYIKLRMDHDYPQLLKFRGR  
NLTGGKFFGPFASAMQVDVTLSELQKIFKLRSKSDSYFTNRARPCLQYQIKRCYAPCVNK  
ISKNEYDDLVRQAQAFLEGKNKKLQEMLSAKMEQLSADMKFEQAAEIRDRIKAISYVQLK

SGGAHSLPDADVIALASHNGEFCVQLFIYRAHQPCGNQAYFPAHTERGESAGNVLSSFLM  
QLYQNKTPPKQILLSHEIDDIKMHEQALKKLHGNSVTISVPHKGGRHKIMENALRNAELA  
LEKHLKISAKNTNALEAVQELFSLPELPRRIEVDNSHIQGAFPVGMVVAGKDGFEKKE  
YRLFNIKESDQTSHGDDYAMLREVLTRRIKRLKSEPHRKPDLMIIDGGRGHMGVMEVM  
AKLGTSLPFICMSKGALRNSGREQFHRPGHDTFTLDKNLDVMKYLQILRDEVHNFAIKSH  
RNKRAKSIRASSLDQIDGIGESRKKALLNYFGSFKAISGATISELKKIDGISDDLAKSIY  
EALRS

>gene\_169|GeneMark.hmm|1005\_aa|+|19895|22912 >NVVL01000003.1 Rickettsiales  
bacterium isolate NORP64 Contig\_source1382A\_1001, whole genome shotgun sequence  
MSKDNSENAIDTPSIFDVAIERRALSLEIQAFSEFAQSLRDKNSDASISLAKYVRETF  
KGQNIIVVPDLTGLELEDLNLKNVDFSGSVIRNTRFRCDLTDSVFCDTDLNGAFFDSTK  
LKNIDFRGANLVNCEFGESYGHLPSEMDEFSSGIKFSITADLGRRYADIKSNNHLLER  
QNLRAAKQGEIDRAYSELTFVQVRVRSLSNASTGYDYDNLTAELANMQKGLYPKEYIMHE  
SFQRVFGSQGSYFPCYMRGSGATERGQEKRYIRTDRAEMEAYLAELKSNPKLILNDFVR  
QRHNAAYPNEMIDDAVIVHADCSSRVGLDNEWILADFSGLNFTGANLQSVNFAGANFTGE  
NSEGTVFTKANISNSSFEAILDNAQFIDTTAIDANFFDADIAAEITGSDFTRAYMANSR  
AHTPNFGDAEVASGTGANAGVRIKESIFNFADISNANWDGITIEDSTFNANLEGVSLAS  
ATIRQTKMQHANLSRAILKEATLIEVDLENARLEQVNAFKVTIQKSVLRNISAREINLSE  
ADLDEFCTLDGADLTQAIMKKAKADKVSFINAQMSGIQASEASFQGANFQNAQLRFAQMQ  
EAKLNDAKAHNVDMTGADLTYIEAQRADFANANLEAIQASRANLTDVMEGADIRAACFR  
NALLERVNLHKAKINPLDISNSNIDGASGTLETEEGENISIKDKKTQDDLVSASETGM  
FRRVAGGLLSVVAWGAKKAAPYMRQIFSSKTGKIAGAILGAALAVGAGWGLAAIGAATG  
IIVGGAAIAGLVGAGIGWKSNGKAAQNFGITGAIATGFGAYYGGAPGAAMAATASVAANV  
IVRGAVGRSIDEIGDGVVEYAANRLDDLSSNIGLSREQQLALKAHQQAEMHYIHPQEIDS  
PVRSSAQGSLWRDQYNNERIKQAARSKQASPSAPPPHSDSAKSAEAESSSGQGAAANA  
ESQPKSQPQPPEPLAKASKKVSHVERTAKKEVDKESKISRNTG

>gene\_170|GeneMark.hmm|212\_aa|-|23073|23711 >NVVL01000003.1 Rickettsiales  
bacterium isolate NORP64 Contig\_source1382A\_1001, whole genome shotgun sequence  
MKLLSGNALYGIQKTSLEKDISKVISNVKISAAEADSASEQALKIKSGVKSSTYNNNYK  
GRQNSSGSKLSGFVGSYGNKPFVNLNRNFAELNQTIKTDYETGIRQIMASLGVEDSASKL  
AINSAILTLETALNKGAIAAFAIAAPAPSTDQEFALKTSITNSALLAVSDSDENEGGNTG  
HGSWSGEEDAPEENKDDKPTDDSNDDELNILV

>gene\_171|GeneMark.hmm|248\_aa|-|24088|24834 >NVVL01000003.1 Rickettsiales  
bacterium isolate NORP64 Contig\_source1382A\_1001, whole genome shotgun sequence  
MMALVLGLTAIMHEYTGGALLLTGAILSVIYCAANWWSVDVITEGRVKGHHTNEVQMGLRI  
GMSIFILSEIMFFFAFFSIFVYSIFPTGIMDGLWVISEGWPPEGIKTFDPWDIPFINT  
LILLSGTSVTWAHHAIKNNDQKNSVIALGITILLGMSFSMLQAYEYYHARFGLSDGVYA  
ANFYLATGFHGVHIIIVGTIFLIVCFRRARKGHFLSGNGHLGFEFAAWYWHFVDVVWVWFLFL  
VFVYVLGR

>gene\_172|GeneMark.hmm|185\_aa|-|24964|25521 >NVVL01000003.1 Rickettsiales  
bacterium isolate NORP64 Contig\_source1382A\_1001, whole genome shotgun sequence  
MGAKSNDIVIAVLCLLLSMMILTASVPIYNLFCKATGYGGTTQRVNPNYALVAKGKRKI  
LVEFDANIDSKLPWRFIPKHRSAEVVTGENTLIFYESENLSHDHIIGTSIYNVTPFKAGK

YFVKIHCFCFEEQLLRAGQKVLMPVSVFFVDPAIEDDPEMDDVNRITLSYSFFKVRDLPDA  
KNNGL

>gene\_173|GeneMark.hmm|244\_aa|-|25522|26256 >NVVL01000003.1 Rickettsiales  
bacterium isolate NORP64 Contig\_source1382A\_1001, whole genome shotgun sequence  
MKNKLIQNIKSQYDKQAVLRGVSYHLEQGEAVGLFGPNGAGKTTLSITIGLVKPDLGQ  
ILLNQDITNLPYLRGRLGIAYLPQEPSVFKGLTVQDNKAILEIAYTDEDEIVSKTEE  
LLDEFISHLKNKFAGTSSGGERRRLEIARALATKPNFIMLDEPLAGIDPLAVRDVRQLV  
SHLKDRNIGVLITDHNVRDRLDIVDRAYIVYDYGKILMEGKPEDIISSNKVREYVLGQTF  
KKGL

>gene\_174|GeneMark.hmm|144\_aa|-|26259|26693 >NVVL01000003.1 Rickettsiales  
bacterium isolate NORP64 Contig\_source1382A\_1001, whole genome shotgun sequence  
MSLILKRLVIFLIYISPLSYHALSDERLRIDSDNLTIKKDDSSASFTGSVEASFNDYKLT  
TSKLTILYGTINGKKDIVKIVIPSKLKLKPCSEEIAIADRGIFDNKTKKLTGTGNVMLQ  
QKDNILATDKLVYSGNFKAINHKK

>gene\_175|GeneMark.hmm|209\_aa|-|26709|27338 >NVVL01000003.1 Rickettsiales  
bacterium isolate NORP64 Contig\_source1382A\_1001, whole genome shotgun sequence  
MPNTDKILARIKLLKYFLSAGICVLIGILATIYGKDMFDSSHANTNSTNSLALRPKLSK  
NHTLSINHSIFEGVSKDLTPYKIIAENVTRNSDNKYQLNRVEGDCSLKAGGLKMRAAAGT  
IDMSTKLVTLKQDVYVTLNENTIFNSDEIQISLNNKDISSNSAVSVTLKDSNIKADKFKA  
LGSSDDIKFEGNIKFESDVKSFSFKATNK

>gene\_176|GeneMark.hmm|325\_aa|-|27339|28316 >NVVL01000003.1 Rickettsiales  
bacterium isolate NORP64 Contig\_source1382A\_1001, whole genome shotgun sequence  
MKHHTHMKHHTHMKHTDIAHNVITSQGDALAVLAKNIPADFAPLIDCILAALKGRVILVGMGK  
SGYIAKKIAASLASTGTPAFFTHPAEASHGDLGMITKADLVIMLSNSGETKELFDTIDYC  
KRYNIKIASITMKEGSTLAKNSDFLLKLPTQKESSAIAAPTTALMTLSLGDSIVTALHE  
AKDFTKEDFKNFHPGGKIGANLLKVQDIMNSGEQLPVVSGGDAFADVIKMNKCLGCAV  
IVDESKTMLGIITDGLRRHIGGDLKISAKDVMTPSFQISPNALATEALFIMNDKSI  
ALPVLEDGLLVGVVHIHDILKAGVS

>gene\_177|GeneMark.hmm|197\_aa|-|28322|28915 >NVVL01000003.1 Rickettsiales  
bacterium isolate NORP64 Contig\_source1382A\_1001, whole genome shotgun sequence  
LPDDFDLSGDLAIDTETMGLMLHRDRLCVLQISTGDGDAQLVQFDGKDYSAPNLKILLD  
ENRCKIFHFARFDLAAIKKYLELDTNIFCTKIASKLVRTYTGHHLKDLCKEYLGVTLS  
KQQQSSYWGTDKLSHQKAYAASDVVYLHSLRAILVERLIDTGRTEIAHKLFEFLPTRAN  
LDLIGWNEIDIFSHMST

>gene\_178|GeneMark.hmm|126\_aa|-|28965|29345 >NVVL01000003.1 Rickettsiales  
bacterium isolate NORP64 Contig\_source1382A\_1001, whole genome shotgun sequence  
MNVERFKVKAGTYKLVLMRYRAPRSFNFRKTLNALLMLLYFVFHHSIYGSRGILAYF  
TLQAELESSHKLELLRAERLEVENRTKLLRPGSLDRDMLDEKTRNVLGLSSPKEKLFKT  
IKTEDK

>gene\_179|GeneMark.hmm|234\_aa|-|29360|30064 >NVVL01000003.1 Rickettsiales bacterium isolate NORP64 Contig\_source1382A\_1001, whole genome shotgun sequence  
MNMTKMINMLKTTKIAKNKEHIMQRILSGIAIGLIFIIAIFLYRPLFTILIYLIAALMLL  
EWFNMTNKSASHLYAGLPIVALPIASLLIISDIDDDGWLLFSFFCLVWSVDTMAMVGGKL  
IGGMKLAPSLSPNKTVSGLCIGVLSAMIVVNILSALPSYQLPYMLPKSMIYLNIIYMLLG  
VIAQLSDLFISYFKRHFSIKDSGTIIPGHGGVLDLRFDSIILTAPLVALYLISNL

>gene\_180|GeneMark.hmm|227\_aa|-|30071|30754 >NVVL01000003.1 Rickettsiales bacterium isolate NORP64 Contig\_source1382A\_1001, whole genome shotgun sequence  
MNHNLNHLAIIIDGHARWAKQHGKTKVEGHRQGAQTIKSLLPHISASGIKHLTYAFSSE  
NWSRPAEEVSVLIKLLSHYVTTETGTLNDNNIRLKIIGDLDKLSPSLQKQIKTIVEKTEK  
NSKMILTIAFSYGGRGEIARACQKAIDSGATNITEDSFKEFLYDPKMPDVDLLIRTSGAH  
RISNFWLWQTAYAELYFIDKFWPDFNEKDLAVAIENYSQRERTFGTR

>gene\_181|GeneMark.hmm|442\_aa|-|30766|32094 >NVVL01000003.1 Rickettsiales bacterium isolate NORP64 Contig\_source1382A\_1001, whole genome shotgun sequence  
MFFIPSNIKILNNIKLLPKSLLIRFMLIIMVPTLIAQLLAVYLFYQRHWYNVTRHTSSL  
VTTEISSLLENYETTPNKQHSYQNSLYIFIPTAKLPAQQKKYAKELEIFKLSLQQRISQ  
EIVLISKDNGRNYLYLQIGDNVLKIELPYKSLIHPSTRIFVLWIFFLTILLLSVSLIFSR  
NQINSIINLTNAVESYGIGEKTKIYKPSGASEVRRAGLAFKMKDRIDRQTAKRTQMLAM  
ISHDLKTPTRMKLQAEMMENPEEKEELMHDIDSMKHMISYLDFAHGEGGENFQKIDLN  
QWVPEYLNQKWSSENISVNLGDIGIFAQIKPHSFERALSNIISNALKYSTKIKISVSLSS  
EKENAMIIIEDNGKGIKEHERKLVFKPFYRADKSRSLGDLSSVGLGLAITKEIINGHYGT  
IILDTSIELGGLLVKIKLPIKT

>gene\_182|GeneMark.hmm|225\_aa|-|32078|32755 >NVVL01000003.1 Rickettsiales bacterium isolate NORP64 Contig\_source1382A\_1001, whole genome shotgun sequence  
MNKKPHILIVDDDSRILKLLKKFLSQNDFLVSTTISASGGLELLSNFTYDLIILDVMMPE  
ITGLDFASKIKNAGNTIPIVMLTALSEPEHRIKGLEAGASYVTKPFEPRELVLRINLI  
NARTQYEKEKQSVRFGNNNYDLTTKELTQNNQTIKLSSEQQLLDILLESSNETISRTEL  
SEKIGVLNRSRVDVQIVRLRNKIETDPKNPKFKLTIRNQGYVLYT

>gene\_183|GeneMark.hmm|291\_aa|+|32845|33720 >NVVL01000003.1 Rickettsiales bacterium isolate NORP64 Contig\_source1382A\_1001, whole genome shotgun sequence  
MDFKSSKKAADFIWINGEFIPWEDAYIHVLTHSLHYAGSVFEGERSYGGKIFKLMEHTKR  
LINSAEIMGLEVNYSVAEINEATEELLKKNLENAYIRPLVWRGAGALGVYGENMVSNLL  
IMAQNSNHPFKNGARLVLSKWRKPTIDAMPPQSKSSAHYAMQIVSQQMAKQQGYDDALLL  
DQYDDIAECTTTNIFFGKRELVTPIADRFLNGITRQTVIEMARAMGIRVREERLTLEDA  
EKYDTCFVTGTATEIKGVSSINYDYKKLEFPNDNMVKDLQEEFAKIVGKQI

>gene\_184|GeneMark.hmm|296\_aa|+|33717|34607 >NVVL01000003.1 Rickettsiales bacterium isolate NORP64 Contig\_source1382A\_1001, whole genome shotgun sequence  
MTSKNIFKGVLTALITPFKEGVVDKGVLENMIEMQIDAAIHALVVGSTGEGGLLPDDEY  
YNLIEIAVKCSAGRIPIIAGISSISTRAALEKVLRLNQGVDGIMSTVPHYVKPEQDGIQ  
MHFEAVASTSKSPMIYIHPSTGSEISDETLNLAQKNILALKDAGDDIERPLRILPK  
LMHENFTMLTGDDSKMLAYTANGGDGCVSVLANILPDKCVEIYDLHASYEALVVQREVTP  
LLNALAAESNPICIKYAASKLNLCRDEESYTLPLTKARAETREIDLALRELGLPR

>gene\_185|GeneMark.hmm|153\_aa|+|34641|35102 >NVVL01000003.1 Rickettsiales bacterium isolate NORP64 Contig\_source1382A\_1001, whole genome shotgun sequence  
MEEYKKIVANNKRAQFEYFIEERMEAGIVLTGSEVKSIRGGGVAIADSHAAFSDGELYLY  
NCHIAEYEKANRFNHETRRPRKLLLRGKEIQKILGKIKLKGTYLMALSVYFNSKNMIKIE  
LGLAKGKKQHDKRQTIKENDWKREQGRIMRDKK

>gene\_186|GeneMark.hmm|307\_aa|+|35102|36025 >NVVL01000003.1 Rickettsiales bacterium isolate NORP64 Contig\_source1382A\_1001, whole genome shotgun sequence  
MNISPDYLIERKRSKKQLSNWKIILILLAALLFSSFGKLPASKNFAAGGFQSKDYIASV  
QIENVIEEDNLRIRKFESIEKDDSIKALIVNINSPGGSVVGSEKIYNVLRKISKTKPVVV  
IMGSVAASGGYLASLGGDYIIAHNGTLTGSIGVIMQSAEVTCLAEMVGVKFENFKSGELK  
ASPNPTEETSPEARQATMDSIYEVYDYFVELVAARRNLDVEYVKKIADGRVYSGRQALDL  
KLVAIGDEDSAVKWLQEEKGIPFGAEVVDVKIRPRDKLIEILLEDLQGCVSGFFSALGS  
KSFKSVI

>gene\_187|GeneMark.hmm|83\_aa|+|36063|36314 >NVVL01000003.1 Rickettsiales bacterium isolate NORP64 Contig\_source1382A\_1001, whole genome shotgun sequence  
MATKKDLVGRVLQKLDYLSPEVDYAVDSVLDCLKAELALENRVEIRGFGSLSIRKRSHP  
KKDELYNSVYYRMSKNIQERLND

>gene\_188|GeneMark.hmm|166\_aa|+|36307|36807 >NVVL01000003.1 Rickettsiales bacterium isolate NORP64 Contig\_source1382A\_1001, whole genome shotgun sequence  
MTNLKIGDIAPNFSITDNAVADTSVVAKDGSATLSDFAGKYVVLYFYPKDDTPGCTVQA  
RGFNSLLKEFNDLGAIEIGISKDDLKSHEKFTNKYDLQFPLVPDMEICKKYGVWVEKS  
MFGKKYMGINRESFLIDPEGKIVHIWPKVSVLKHAAEVLAKLKEFV

>gene\_189|GeneMark.hmm|181\_aa|-|37266|37811 >NVVL01000003.1 Rickettsiales bacterium isolate NORP64 Contig\_source1382A\_1001, whole genome shotgun sequence  
MEKSYSDVIKFWFEEIEPIQRWKKDPNFDAMITQKFGHVHTQASKGVLTPWRVNALGALA  
EIIILDQFSRNIHRDTPAAFANDQLALRLAEDAIEQKYDQELEVSHRSFLYMPFMHSEEQ  
KIHNRA MELFVQDGLGAYDFEKKHKVIIDRFGRYPHRNEILGRVSTPEEIEFLKQDGSS  
F

>gene\_190|GeneMark.hmm|308\_aa|-|37867|38793 >NVVL01000003.1 Rickettsiales bacterium isolate NORP64 Contig\_source1382A\_1001, whole genome shotgun sequence  
MEFLAVIGFILAILAWGGVKIVPQQQAWIVETLGKFDQILGPGLNFLIPFVQKVSYKHTL  
KEVAVDVPRQSAITKDNVTLIDGILYMRIIDAKAASYGVSDPHYALTQLAQTNMRSQIG  
RLTLDKTFEERENLNANIVNSINEASSTWGIQCMRYEIKDITPPHSVLQAMELQVAAERQ  
KRAEILESEGKRESQINIAEADKREVVLKSEAALTDQINRAKGEAEIIVAVANATAKGIS  
TIAVSIQEQGSDAVSLRIAEQYIDAFKELAKESNTILLPANVNDVGSISSIVAQGTSIF  
DAIRQQKK

>gene\_191|GeneMark.hmm|156\_aa|-|38824|39294 >NVVL01000003.1 Rickettsiales bacterium isolate NORP64 Contig\_source1382A\_1001, whole genome shotgun sequence  
MIFEYLTNNHTLWLLLGAIFIVLEVTAITGIGFLFAGLAAISLGGIIFDLITSNDPVL  
EIAIFLLLSFVWASILWIPFKRFKHSRTNKPFSNIVGDIAIIESSTLAPGKIGQVKWSGT

IMRAALDSKGTAVLTKGDQVVIKALNGNILIVESIN

>gene\_192|GeneMark.hmm|233\_aa|+|39736|40437 >NVVL01000003.1 Rickettsiales  
bacterium isolate NORP64 Contig\_source1382A\_1001, whole genome shotgun sequence  
MKPLYKSLRESIESGDYFQDSRNWYKYKIYYPFAQRSLVLILSAIIFVIFFGVVLDLYAL  
LPIVSQVNYSIATDYSQNSNAKIIHANRVPNSPLISADIMLRNYVKNREHYSYGLKKQ  
FIFVKNNSTRIVFRRFYNSMNIDNPLSPVMRYQKTIQRQAMIISTHHPFAGKSIVKFATI  
AQSPSRAHIENIVWQATISYEIDKINTASPSGTRFNFTVTDYKCLKLLENKNAK

>gene\_193|GeneMark.hmm|254\_aa|+|40441|41205 >NVVL01000003.1 Rickettsiales  
bacterium isolate NORP64 Contig\_source1382A\_1001, whole genome shotgun sequence  
MENGIMKQIIILAILLSASSVFAIRESRPTSIDSRIRVMVYNPNDFKFTGYYGYQASI  
ELASGEEVVSISMGDTSWQIVPAGNRIFIKPMEQDATTNMTLITNKRTYYFELYAEETL  
DIRDPAMVFVNFVFLYPDEEEEDHIRTFASASQAEPNLNHPEKFNFNYSISGNESIAPIKI  
FDDGEFTYLQFRDKNNEIPAIFAVDKDLRESMVNFRLLDPNNRNLIIIVEQVFHKLALRSGQ  
NITCIFNEAFRQGY

>gene\_194|GeneMark.hmm|89\_aa|-|41569|41838 >NVVL01000003.1 Rickettsiales  
bacterium isolate NORP64 Contig\_source1382A\_1001, whole genome shotgun sequence  
MCKSDHRSHKGLNNRVENAHQPTRKKEKITIKFKSPQGVQNTLSLMGKIRNIFSVDVGR  
YTQNATNQRSFAFNKAKSIWDDAAQGLLAA

>gene\_195|GeneMark.hmm|109\_aa|-|41948|42277 >NVVL01000003.1 Rickettsiales  
bacterium isolate NORP64 Contig\_source1382A\_1001, whole genome shotgun sequence  
MYINKAPKRHRFPVSIISHVWVLYHRFNHSDRDIKEQMAYREIILSHETIRSWCYKFSSH  
FKDVIKKQERNTKDKWHLDEMTIRINGEYFVLWRAVDSDGYELDISTET

>gene\_196|GeneMark.hmm|115\_aa|-|42362|42709 >NVVL01000003.1 Rickettsiales  
bacterium isolate NORP64 Contig\_source1382A\_1001, whole genome shotgun sequence  
MTKKIAKXSEDINSKLIEELLSKSDPGELFGKEGMFSQLKKQIVEKILESEIEHELGYSK  
HSKMSKSNRNRNGSYEKTVLDDDEGYKIPRIEIPRDREGEYEPKLIKGVRRAPSS

>gene\_197|GeneMark.hmm|90\_aa|-|42751|43023 >NVVL01000003.1 Rickettsiales  
bacterium isolate NORP64 Contig\_source1382A\_1001, whole genome shotgun sequence  
MNYTPRLNLPLIHSGQAQKEITHNEALSMLDVLINPAQKIGQGWRFTPSKWLEVTLDRD  
GSKHRFNGEYWAPSSMGVCHKLCVSCCKIQ

>gene\_198|GeneMark.hmm|82\_aa|+|43097|43345 >NVVL01000003.1 Rickettsiales  
bacterium isolate NORP64 Contig\_source1382A\_1001, whole genome shotgun sequence  
MTHVILSNIVASISELKTNPSTVRSAMGKPLAILNRNQPVFYCVPADLYEAMLELIDDV  
ELAQIVTQRASEKEIAVDINDL

>gene\_199|GeneMark.hmm|58\_aa|+|43335|43511 >NVVL01000003.1 Rickettsiales  
bacterium isolate NORP64 Contig\_source1382A\_1001, whole genome shotgun sequence  
MTYKLTFLSAKKEWRKLSPIQVQFKKLLNRLSEPKVSHLIIPHLFVLKLYLIFS

>gene\_200|GeneMark.hmm|1239\_aa|-|43708|47427 >NVVL01000003.1 Rickettsiales bacterium isolate NORP64 Contig\_source1382A\_1001, whole genome shotgun sequence  
MGSFASMALPIAGGFVGGFMVGGVGTAIMGANLGS AIGGMFASGKSRTVRLPSQNGARLGD  
LRVQISSYGEVIPKLYGTMRLAGNVIWSTDLKETEHVHTQSFEQSSGGKGGGGRRVTTT  
QNSYSYTSVTLAIAICGGEVDEISR IWADSKLISAETLQTNQGFNIYLGTEDQLPDDI  
IARHKNGAEFPAYRGLCYVVEDFPLEKYGNRIPNFSFEVRRTVRFVPAVEDKVRELILI  
PGSGEFVYADQVCAKKRQFPYGGTYGHSVINMHNYDGKPDMLLALDQM QNTLPNLEWVAL  
VVTWFATSTNAGNCRIVPKVEFKDEEAIIEPQEWGVAGFTRETAEEVLRFDERTPTYGGT  
PSDHTITAICKELKSRGLNVM LYPMIFVDELEPHPKPWRGRIRANSAIEIDHWFNGGSGY  
NRFIKHYADLTCGIVNAFVIGSEMIGLTGFTDRPGSYPATAQFIKSAEMIKDRVSNNTIV  
TYAADWSEYHHTEGGWFNMDSLWASKAIDVVAIDAYFPLTKDLPQSEITEELIQAGWESG  
EGWDYYCDEDTRRHPFHGAKYAWKNLEHWWSTKHTNPDGNIT EWQPRMKPVWFTEFGFPS  
VDACSNQPNVFDSSSIESCFPRGSLGRVDFLAQRQALNASLDYLESRTKRNGLDQLVPK  
RFVWTWDARPPAWPDNKRAWQDGLWKTGHVWNGKFGQSSLAIVADLLCEVGLSAADY  
DTSRLIDQVDGYIISQHITAREAIHLQAAFFDVALSDGILK FVPRIGRTNVAEITSE  
LVSNNNQDINETIEITIAQELELPEKINITHIDKGREYDTATTSSKRQTVSSKEQVNIIL  
PISMNQQAQKQIADITLYNAWQERKNYQLTLPKYGYLEPTDIITVQ TGNITHQMRIVKT  
DMQRTAQMRIVATNYNANMYDFHSSIQGEYEQEYDFPLPVAKTKIELIDTPPLPSDQTT  
ATVRIAVIPEHENWNGVAIYKTTNDGYDYKLLTTTNIASITGVSLNKLPPAASTIFDYRS  
EIIVQLPYGELNSVIELVLLNGANAALIGNELIQFQHAELIADHQYKLT KLLRGRQGTEH  
AIDTHSEGERFILLNEGILEGKVS HDMIGRSVLYKPV SIGSTLAETESVEFTHYAIHLKP  
FAPVHVTAEHVENNIKLSWIRRTNHQWRDNVDIPLGEEYEKYEIDIKTSDGKLITTI  
ESTEPAALYDRDQSQDNLTATIYQISSIVGRGYGTRIEV

>gene\_201|GeneMark.hmm|156\_aa|-|47448|47918 >NVVL01000003.1 Rickettsiales bacterium isolate NORP64 Contig\_source1382A\_1001, whole genome shotgun sequence  
MKTKLSQKIVTAARSWLGTRYHHQGR LKKTSKHKGGVDCVGLVMGVVAELNITGAGGKNL  
IELDRTDYS AHPDGRSLVEFLDMHLQKTNLKKIKDGDILLFKLFKHPQHVG IATLGKIRG  
LGVIH CYSASGSVVEHILSPA WLRMIVGVYRFKLDK

>gene\_202|GeneMark.hmm|284\_aa|-|47920|48774 >NVVL01000003.1 Rickettsiales bacterium isolate NORP64 Contig\_source1382A\_1001, whole genome shotgun sequence  
MRQLTQELTAHLSAEVTTLASCWRIERTDGLVLGFTDHD RPLMIDGVKYDSIAGFTPTNV  
ESGSDMAVDNLDLAGQTFPSKITEIDLLAGKYDFAKLEFLVN YNKPNTGKLIQKRGLLG  
EVTIKKQLFYAEVRGLTQFLSQTMCESYSPHCRATLGDARCKFNLDQGEYTVRAAITEII  
NNQTFRASILNHE NEWFKDGYLIWESGNNIATKMEVKEFANHMVTLALPMPFAMHESDEF  
SIIAGCNKSSNCKQKFNNIINFRGEPDLPGIDKLMRTAGTALK

>gene\_203|GeneMark.hmm|201\_aa|-|48771|49376 >NVVL01000003.1 Rickettsiales bacterium isolate NORP64 Contig\_source1382A\_1001, whole genome shotgun sequence  
MPSFIEAQFPAGISYSGKGGAMFSTDIVSTFSGHEQRNINWHQARARYDVASGVKTP EQW  
QELIAFFRTRRGRAVGFYKDWSDYQGVNQH LGTGDGRKTIFQMVKHVSGDAVYSRIIN  
KPVCNDFCKIYIDSILYEDGINIDFTTGQVEFRGAPRIGEEITADFEFDVAVRFDTDHLD  
LSMDGFNTGSWQNIPLIEIRV

>gene\_204|GeneMark.hmm|599\_aa|-|49386|51185 >NVVL01000003.1 Rickettsiales bacterium isolate NORP64 Contig\_source1382A\_1001, whole genome shotgun sequence



MAATKEVRVTFRGVDKTKQAFGRICKNFKDMEKLSSKVTRGFGGIGMAIGAAFGTRALKK  
IIDTGDQIGKLSRLGATTEGLSELKYAAEMTGVEFNSLSTGLQRMTRRVSEAAALGTGSA  
KDALIELGLSAEHMNSLKPEQQFELIANAMSEVTNESDKVRLAMKLFDTTEGVALLQTMFH  
GAEGIRKLREEARKLGLSLSGEDTKAMEAFNDSLGLKQAVLTGLLTSVLLPLLPATAFF  
EAIKDGNPVLTFLITALASLAGLRLAAWFAAAALSVKFTLALMANPIGLVAVSISMAVA  
ALVSLTRWFRKSTDAGAEHNKILQQAKLVSDEIVIANQKQFEALKKNNEAHLASKNILKK  
TSAPLSKHNNQLEKMNKLLKEGANNQNLHNNAMEQSVHQLEQTKTINADVSTIETHSKR  
AADRMIDNLANCAFGAKTHAGSMKSTFKDLFKSLQSDILKTTLQRGLFGASAGGMSGMGG  
MGGGGLLGGFLSALSGGAGSGAGGGLGGLLALGNFVGFFAKGGTARAGKAHIVGDGGEF  
ELFIPSTTGSITPFSKLSGGSNVTVMHIQTPDIASFNHSRGQITADMARQISRAGRNL

>gene\_205|GeneMark.hmm|119\_aa|-|51330|51689 >NVVL01000003.1 Rickettsiales  
bacterium isolate NORP64 Contig\_source1382A\_1001, whole genome shotgun sequence  
LIFKMNNRIIDRVKAHFDKAKETKIIEVAEWGEGEESLYIHATPLTLAQKNRLYKMAKDDD  
LGLMVEALIMKAKDSEGESLFSRSDKPDLMRGCDPDILIRVANAIMGDADDDITPIKKN

>gene\_206|GeneMark.hmm|146\_aa|-|51686|52126 >NVVL01000003.1 Rickettsiales  
bacterium isolate NORP64 Contig\_source1382A\_1001, whole genome shotgun sequence  
MATHAGSEGIVKVGDNQIAEVKSWSLSEVSDTVDASVIGTAWRKHQATIKSWSGSIEAFW  
DEADAAGQGGLLIGSEIELNLYPEGVADGRRYFTGTAIVTGISRQGAFDGIVESSFTFQG  
NDELFEHNDGGAVIIDGVAAGDED

>gene\_207|GeneMark.hmm|147\_aa|-|52156|52599 >NVVL01000003.1 Rickettsiales  
bacterium isolate NORP64 Contig\_source1382A\_1001, whole genome shotgun sequence  
MVHARTNIRRAFIDLLIGATDAGARIYDSRIYTLKRSLEIIVFSDHEEITDTISWPR  
SQERSLRVSVCEYVKSNEVSSAVDNISAQVESLILASSNLGGICKDCRLEATDISLNND  
GEQPVALASLVFAVLYRTLENSPEIIV

>gene\_208|GeneMark.hmm|112\_aa|-|52627|52965 >NVVL01000003.1 Rickettsiales  
bacterium isolate NORP64 Contig\_source1382A\_1001, whole genome shotgun sequence  
MLRALQLLGLDFMFREDLTFELDPEQGFVNGTVIQADGMQYVLTGILSSDYVDIDSGMA  
GVAGSSPCFECREDDISIRYDDSLQVSGKHFRIKAIKPDGTGWAVLVLEEQ

>gene\_209|GeneMark.hmm|709\_aa|-|52934|55063 >NVVL01000003.1 Rickettsiales  
bacterium isolate NORP64 Contig\_source1382A\_1001, whole genome shotgun sequence  
MTIYMNNINIEAERKTMTQMTNTEVKAEMPYRNDKQKQTNIDLLYIDDDNLALIKNE  
LSEGREENPEENLGERSFYLSFSEDPYERSFGIEILDHGEDCVDLWLRSGRAPLLLDH  
DHKKQIGIIESAEITDLRGRKVRFRGRSVLAQSVYQDVIDGIRGNISVGYKYKRSDLVL  
SEKGEEGKPDYRVSKWEPLVSLVSIQADQTVGIGRSDNARKSKPKPKSSKKPEQEISN  
NETNIIYKVRSDMEPNKTEAKITEASAMQASEMRTSAMQTLPMQALSNIADAGFNPEQIRQ  
DETRRIEILALGDKHNMQERAMEFIKTGRTIDNFRQILDTLSTSSAINTARQENPIIG  
MNHKEIGSFSIIKAIRAVISGNWRGAELEKEASETVSKQVGREPASFFVPLDIMAEQRSM  
QIRNLEKITNVAGGYLVGTDYMSGFIELLSKMLVKQMGAQVMSGLHGDVAIPKQTGGA  
TTYWVSEGGAPDHSQQSFGQVTLSPRSIAAFTDFTRKLVQSSPDIELRNDLATVIAL  
EIDRVAISGSGNGAEPLGILNTDGIGEVAINADPAHADAIWGWKIVDLESNIAAQNADIG  
TLGYLCNANMRGLLKQKEKANDTAQFIWENSGEQGFMLNGYRVGTSNQPANSLLFGNF  
GDLIIGQWGVMDVLVDPYTLGTSGGIRIRVMQDVDLAVRHAESFAVARA

>gene\_210|GeneMark.hmm|525\_aa|-|54993|56570 >NVVL01000003.1 Rickettsiales bacterium isolate NORP64 Contig\_source1382A\_1001, whole genome shotgun sequence  
MKLFNFFRKSSKAQTRNMSQRKYAAASINRLNADWVTSVLSADSELYNDLRTLRSRSREL  
CMNNDYARRFLKRTGVNVIGATGIRLQVKAKDNSGKLLREINSHIEEQFHLWAKKGNCSV  
CGKLSWVDSQKLFLESVARDGEVIVRLVKGFDNDFGFALQFLEADHLEDDLNMPLDNGGY  
IRMGIEFNKWNRPVAYHLLSHHPSEVFHDKTSYEKKYQRIPASEIIHGFLIDRPSQSRGV  
PWMHTAMPRLRMLAGYEEAELVAARVGASKMGFFVSPDGTGYAGSEHENDSPIMEADPGT  
FEQLPSGMDVRMFDPNHPAGNFASFEEKAILRGVASGLDISYNTLANDLEDVNFSSIRHGS  
LEDRDSWKVLQNWVIEHFVCRPVFEAWLLMSITSGKIEISATDFDKFNKPVWRARGWAWVD  
PLKENHANQIAINQKTKTRAQVAADQGMDEELFQQLAFEDELAKEYGLDLNTARYREDR  
DRDKQLDRSSLDGSKLDNNSSENDNIYEYKYKHSREKDHTDDE

>gene\_211|GeneMark.hmm|183\_aa|-|56584|57135 >NVVL01000003.1 Rickettsiales bacterium isolate NORP64 Contig\_source1382A\_1001, whole genome shotgun sequence  
MKKYNIEPASFTAGETVTWKKWIAGFESASGWELVYLMRSQSDDSAIEFAAEIEDDHHLV  
TLASNETINYKTGQYWWQCFARRAGEQHIAEGSMFVKPNFSQMDRVDGRSHVKKTLDAL  
EAMIQKASRDQLSYSIAGRSLRSLSPSELLQWRDQYKAEYVLRKSGDLNDQVIKIF  
GRV

>gene\_212|GeneMark.hmm|34\_aa|-|57176|57280 >NVVL01000003.1 Rickettsiales bacterium isolate NORP64 Contig\_source1382A\_1001, whole genome shotgun sequence  
MNHDSGEPASDITKEVNRDIDLYMKYGEKYLNT

>gene\_213|GeneMark.hmm|634\_aa|-|57345|59249 >NVVL01000003.1 Rickettsiales bacterium isolate NORP64 Contig\_source1382A\_1001, whole genome shotgun sequence  
MTNALVKRISKQAAPPPRLKVSQWADQYRQLSRESSAEAGKWSTDRAPYQRDIMDAVCDP  
SVEIVVMSSAQVGKTEIINNIVGYIHHQDPSPMLVVQPTEKLAESWSTDRAPMLRDSE  
VFHNLVKDPRSRDSGNKILYKRFTGGHITMAGSNPSSLASRPVRLVLCDEVDRYPASAG  
SEGDPVNLAKKRATTFWNRKIVLTSTPTIKDLSRIEAAAYLQSDQRRYVPCTSCGEYQTL  
KWGQIKWKKSTCEDSATKSKDQPETAYYVCEVNGCILRDTDKAAMLSAGEWRAENEFSN  
IAGFHLNELYSPWVSWERIVAEFLKAKLMPETLKTWINTTLGETWEEQGESVDENSLLSR  
KENWGD LAPSGVVIVTAGVDVQDDRLEIEIVGFGKGQESWSLDYRVIHGDPAEDVWNDL  
DNILEQTIKHESGINLRIACTCVDSGGHRTQSVYAYCKKRQLRRVFAIKGSGVPAKPIIS  
RPTMSNRMRVKLFSVGTDTAKEMIYSRLKITEPGAGYCHFPARYDEQYFKQLTAEKVTR  
YHKGFVPRKWEKPAGRRNEALDCRVYALAAALHIINPDLELLAKMKIEGSNDKQHQQQND  
YNQRKARSWEVTRGISHQGSRRGGTGGRSSFIKNW

>gene\_214|GeneMark.hmm|162\_aa|-|59218|59706 >NVVL01000003.1 Rickettsiales bacterium isolate NORP64 Contig\_source1382A\_1001, whole genome shotgun sequence  
MQTYSISTISKLLNLSERRVQQLSKDGIIPKAERGKYDLVSSVQGYVGYLYARAFGKNTA  
SIDAHAEKARLLKAQATKAELELDILKDKYIETEVEFLYGGVLVFRSKMLSMPSKLV  
RLAAVGSDFARIEKILEDEIYEALTELSKYGDHDKCISKKNK

>gene\_215|GeneMark.hmm|347\_aa|-|59710|60753 >NVVL01000003.1 Rickettsiales bacterium isolate NORP64 Contig\_source1382A\_1001, whole genome shotgun sequence  
MGLSTNISWNLSDLEKIESNGYKVFSCFSCAGGSSMGYELAGYDVLGNVEIDPKMMRLYL

LNLKPKYPFMMGIEQFNHLADKDLPELFDLDILDGSPPCSSFSVAGVRESKWGKKTAFR  
EGQKEQVLDLFFHFINTASKLKPVIAENVKGLIIGKARGYVKQIIELFNKTGYKVQL  
FLLDSSTMGVPOQKRERTFFVARRDDLNLPELKLSFSETAISTSKALQDVDWRNNKITWLT  
ENTKLLWQKTKLGAPLSEAHPKGSRFNEKKLNPNKPATTLTTHCPPLHWALPRRITVSEA  
IRLQTFPDDYNFANRDGFYPIGMSVPPFMMQRLANEVQKQWLDNLEK

>gene\_216|GeneMark.hmm|167\_aa|-|60744|61247 >NVVL01000003.1 Rickettsiales  
bacterium isolate NORP64 Contig\_source1382A\_1001, whole genome shotgun sequence  
MKIQLINISKLIPYAQNPRHNQLAIKVAASIKEFGWQQPIVVDGNMTIAGHTRYMAAT  
QLDLKKVPVYVASSLTAQVQAYRIADNRLHEDSSWDELLELDELKDDSTDLELIGF  
NAMELEKLIGDGKTDISNSKSSASREIKLSEFQFAHQCPKCSFEWD

>gene\_217|GeneMark.hmm|194\_aa|-|61441|62025 >NVVL01000003.1 Rickettsiales  
bacterium isolate NORP64 Contig\_source1382A\_1001, whole genome shotgun sequence  
MQISVSSNIKQIAKQLDHMQRRQLPFATSTALNKIAIAAQSSITKAIPFIFNNRKKWWGK  
NQPTGIKVKFANKYELVSAVYTRAYFANIQEEGGIKTPRSGHKLAIPASGAPRKRFSNA  
LKKEQGNRSRIFKSKSGKSILRRIGKNSIQKLYTLTDKAHIKPRFGFQKTAHKVFIRHFDK  
IFQRQLDRALKTAS

>gene\_218|GeneMark.hmm|148\_aa|-|62040|62486 >NVVL01000003.1 Rickettsiales  
bacterium isolate NORP64 Contig\_source1382A\_1001, whole genome shotgun sequence  
MATTEEKSNRMLQLFAPALVGADQANIAAIDVSGFESVLVIANIGAAGDDLNNQNNYIE  
IELEESDNNVDFTHCSDESMQDAVAGTNTGTIAHLEAIDGAGISIMAAYKGQMRYPVI  
RMTGNHGTGTIIGVSAILRGTKYRPVAA

>gene\_219|GeneMark.hmm|167\_aa|-|62710|63213 >NVVL01000003.1 Rickettsiales  
bacterium isolate NORP64 Contig\_source1382A\_1001, whole genome shotgun sequence  
MKMNTAKLNTLKLQTAKPQTTKLPTPNKNDKRPIAKFHRSWLQDTLSGTPLEKHRGINQT  
QYAAADRLSSNYQRIFSNGGWSPEEVQVKQDYFRSNGVERKAESIHNHRIFKQLSKNSQ  
AIIHFCLNEQPIRAYELQIPNWPKGAGTARLREGLDELVEIYKNS

>gene\_220|GeneMark.hmm|50\_aa|-|63408|63560 >NVVL01000003.1 Rickettsiales  
bacterium isolate NORP64 Contig\_source1382A\_1001, whole genome shotgun sequence  
MRAQIKRKSVIIIALLQNSLLQMGENAIKRLCHIVTGIQGFLFLHLQ

>gene\_221|GeneMark.hmm|771\_aa|-|63544|65859 >NVVL01000003.1 Rickettsiales  
bacterium isolate NORP64 Contig\_source1382A\_1001, whole genome shotgun sequence  
MSNIIQMVPNALPQRDQLQTFYVLFYSEGLIPCRSFPESGTDNSQRPHNIWIDADELV  
MDKAVTFAKWTAREKVAFYVIPGIVSKQGQAGSDDIQMQVLLIDIDSGDTEEKLTLS  
AIGQPTMIVESGGITPEGSAKLHIYWQLERPAAGDDLQRLIKLRYRIALAAGGDTHFKSA  
HQPIRVAGSIYHKKGACKLVKIRSYEPLEYNLEELIKSAEKLPKCKEEDSSNPLDYNNTT  
PVFKDLLISKVYEGGESEQSRFSLQRVTGFWLRRLEHGAITQQQAWEEITGYNAANVVP  
AWDEKKLRQLVDGLWRKHVKKHGEAAESGEYDPKPEQKTQESTPVKPAKVASYSGLTFLN  
DTSSLPEDIIAPRILTPSGMFVFGGAPKVGKSDFLSLFTHMAAGKEFIGKPPRPLKIF  
YFQAEIGYHYLRERLQNMQLSDEIIKLAQDNLHITPNTKLLNNEPGIEAVAAQKSVFQD  
ETDIIAIDPIRNVFDGGRDGTENENDAMLFFLQKRIEPLRDMINPNAGIILAHHTKKS  
HKQFDEEPFAAFSGASSLRGYSSGAILRKSELDDNERELIFELRNGAHIPTKILNKKDG

AWVEEDSLNKRIAYKTNGTTYDMERERRIMLITKLLQSQASKGKFYLMNQFAQKYQNHKD  
LGGRRSIYDDCSIAATKGDIKFFNPNPKDYNPKISNPEKGFGMCTEHMKIHISKTVDSDT  
GEIVENNEIILPTHYKNEGDGRKAEMKYPEIWDVDSEENNTINEVENAGSN

>gene\_222|GeneMark.hmm|262\_aa|-|65929|66717 >NVVL01000003.1 Rickettsiales  
bacterium isolate NORP64 Contig\_source1382A\_1001, whole genome shotgun sequence  
LGVDVMLDYNHRSSKSSAPINDQLNILIDDALVKIRDTQPKRRYLGASQLGVPCSRLQY  
EQSGDGKDPGKGFSGQTLRIFAAGHVFEELAIKWLRDAGFELLTNQEDGSQFGFSCAGGN  
LAGHVVDGIITRAPKALGLAVPALWEMKSMNNKSWKETVRKGLVVS KP VYAAQVALYQAYM  
EESVTGISKNPALFTAINKDTAELYHELIPFDGELAQRMSDKAANIIRATKAGEMPLRIA  
SSSEYYECKMCAYQQRCWGDRQ

>gene\_223|GeneMark.hmm|179\_aa|-|66708|67247 >NVVL01000003.1 Rickettsiales  
bacterium isolate NORP64 Contig\_source1382A\_1001, whole genome shotgun sequence  
MQFNDFNNAETSNDLIKKGTIAKVQVKIKPGGYNDDEHGWTGAYVTKNEASDACYLNCE  
FTVLNGEHQGRKVWVSLIGLYSSKNDNRWGNIGRGFIRAILNSSRGYSNTDESEKASQARK  
INSLAELDGIEFIAKIDVEIDRDGNDKNVIKTAIDPSHKAYLASEQRQAGSAVDNAVWG

>gene\_224|GeneMark.hmm|299\_aa|-|67237|68136 >NVVL01000003.1 Rickettsiales  
bacterium isolate NORP64 Contig\_source1382A\_1001, whole genome shotgun sequence  
MNKLPISAGERLSETRGIKGCILGKAGIGKTSLLWTLPVESTLFLDLEAGDLAVAGWGG  
DAIRLRTWSECRDFAVYLG GGNPALRDDQPYSKAHYDAVCKRFGSASSIEKYETIFDSI  
TVAGRLCFNWSKNQPQSYSDRTGKEDIRAAYGLHGREMISWITHLQHSRDRNIWVFGILQ  
EKLDEFNRKVFSMQIDGSKTELELPGIVDQVITMAEIAGDDERPYRAFVNHTINPYGYPA  
KDRSGCLRVL EEAHLGRLMEKIKRAQQDGKNLTYDMAKESVNNLNKQSNKQNKENNYAI

>gene\_225|GeneMark.hmm|171\_aa|-|68129|68644 >NVVL01000003.1 Rickettsiales  
bacterium isolate NORP64 Contig\_source1382A\_1001, whole genome shotgun sequence  
MDDINYRNDIAKMTTKEVLHIPIGTVSNYASLLYDLHKEAVA EFEDARKTRQWIESAI  
GMKYEEKVRAKVRLEKDSGIVHIEDDEFQITNDAPKKVEWDQRKLRGIMAGLIANGVDL  
DELVETVYKIPERRFAECSSILQGSFAAARRVRLGKESYKLSRLETGGDHE

>gene\_226|GeneMark.hmm|86\_aa|+|68904|69164 >NVVL01000003.1 Rickettsiales  
bacterium isolate NORP64 Contig\_source1382A\_1001, whole genome shotgun sequence  
LNEKTMKLV TWMKLSNLTQGQLAKLINASPQRHKKYLYGGAIPKEKAIHEIYIKTLGSVR  
PEDFYKETS DIFEQELLKKQAIDGEA

>gene\_227|GeneMark.hmm|117\_aa|+|69169|69522 >NVVL01000003.1 Rickettsiales  
bacterium isolate NORP64 Contig\_source1382A\_1001, whole genome shotgun sequence  
MNKKPTILTIDLGTQTGWAVQAQTGKISSGTESFHRTRFEGGGMLFLKFKRFLTDLKNRY  
AGLDYVYFEEVRRHLGTDAAHIYGGFLGQLTAWCEHHNIAHPCWNHQAHSWQRQCL

>gene\_228|GeneMark.hmm|105\_aa|+|69655|69972 >NVVL01000003.1 Rickettsiales  
bacterium isolate NORP64 Contig\_source1382A\_1001, whole genome shotgun sequence  
MITTPSKPADIKQLNTAIDQLNEFLSKDYITLLQQQYLSPETVAKIMEVKTSLLSNWRV  
TGGGPSYIKLGSRSRGLVRYPLLGOAGLIHYMQQKLQNSSSDDKI

>gene\_229|GeneMark.hmm|399\_aa|+|70047|71246 >NVVL01000003.1 Rickettsiales bacterium isolate NORP64 Contig\_source1382A\_1001, whole genome shotgun sequence  
MIKTDMKNIKASNKFKITKLLDDLPSNKRYYIWDSELPNFGVAVQKTGYKSYFLDYTT  
QDQKRRRIKIAIVGEITPDEARKKAYKHVLLISQGSDDLPGKQLKNDEPTFKDVAEEYIE  
KHAIPFKKATSIAGDREMLRKHILPFFEKISIKEVKRADIKEFHYYQLREKKYTANRCVQL  
LSKMMNLCEEWGYRDPGSPCKGLKKYKEDAKERFLTLEEIKRLQLALDRFHESNQxPYF  
PPLIRLLLLTGxRLSEILKCKWEYINFERKVIELPDSKTGKKEIILCDRSMTILNNIKHI  
PNNPYIIVSSKKEGTHFNNPRKSWAKLLRIAGLEGLRLHDLRHTHASIALMQNIPLEVIG  
KRLGHKTIQTTMRYAHLADSHLRKATDIVSNALGQAMGG

>gene\_230|GeneMark.hmm|51\_aa|-|71380|71535 >NVVL01000003.1 Rickettsiales bacterium isolate NORP64 Contig\_source1382A\_1001, whole genome shotgun sequence  
MGSNTESKAEGRGVGLALCKAVIEAHGGEISAESRPVGFALFRVCLPYGKGV

>gene\_231|GeneMark.hmm|165\_aa|-|220|717 >NVVL01000004.1 Rickettsiales bacterium isolate NORP64 Contig\_source1382A\_1352, whole genome shotgun sequence  
MEIPTLKELEQIEVTNPAADIAQREKVFPCRSRKSTPDGGGYGTGRRKNSIARVWVKPGK  
GIVTVNKKLCAEYFSRESYVTSIMQPFLDTNTNGQFDVVCTVKGGGSTGQAGAILNGIAR  
ALDAISEDYHSLRKNGLTRDSRIVERKKYGRRKARKKAQFSKR

>gene\_232|GeneMark.hmm|155\_aa|-|724|1191 >NVVL01000004.1 Rickettsiales bacterium isolate NORP64 Contig\_source1382A\_1352, whole genome shotgun sequence  
VKTYSAKPSEIEKNWLVIDAKDLVLGRLASQVAILLRGKHKPMFTPHMDCGDNVVIINAQ  
HIHLGKKGDRKDGKFFYRHTGHPGGIKETTAGKVLGKYPERVVEMAVQRMISRNMGR  
KQFGNLHVYAGSEHPHTAQQPQVFDVADRNSKNKK

>gene\_233|GeneMark.hmm|437\_aa|-|1287|2600 >NVVL01000004.1 Rickettsiales bacterium isolate NORP64 Contig\_source1382A\_1352, whole genome shotgun sequence  
MNNISLKKSIILLSLANLFFFFQFILRLSAGVFRDIMQRFVAVDVASFGTLGAYYYLGYA  
GAQIPLGIMDLRSLFRVTSIAIAITSIGTLLFATAMDWGMMLVFARFLIGISGVAFISI  
VKIIKTCFDPKHTSMLIGFSFTCGLLGAVFGVIPMRILFDNLGYEDTFYALAIFGFFIAA  
IMFIFAKTGNEDRAGNEDEKNNSSVRDSLKSVMSLMLNPTILIGISGGLMVGALEGFAD  
VWALSFFHHVFAMSRAESA AVTSSVYIGMCVGGPLLAMFANILRSTNLMIFITGMLTIIV  
FMILFYVPSLSVYSATILMFFLGILCCYQALVFITTTKVSESSAALAI VVQCINMSFG  
HFFHSVIANIFVKSWDGMIGESGGAIYTLNENIYALAIPIGCGVGQFGFVYLSWRAKRR  
GSESAVSSQLCNKMSRS

>gene\_234|GeneMark.hmm|373\_aa|-|2816|3937 >NVVL01000004.1 Rickettsiales bacterium isolate NORP64 Contig\_source1382A\_1352, whole genome shotgun sequence  
MSKQEISDYIRDAGFFKDLKDLQLAITDISEIESYANSEVVFKEGEKSRDLFLIISGGV  
DLYKLSQHKYVFFTSLDTNNFIGEMAFVDGSPRSKVISNNDTKLMKISYAFLEKNHPKL  
LNILMPKIARIIMERLRKSTSTHVQTIKLNQQFKIQNEFGYFFIAIIMAFATSAFMNKI  
LEHFNIYEPGYSTLLYSWAYLITVSAPFLALLCIFKYKLSTLGVTSKNLRVSLVESVIVG  
SIAILLFGTFSVLGIEVDILGDVDYRENVSSFTFLKLITYMIHSLVQEFVARGLLQHS  
IQRFLDRRRGIKSVLITSTLFGVGHHLHITISVAAMTF AVSVLLGLLFLRHKNIWGISLVH  
FAMGVVGVIVSGVI

>gene\_235|GeneMark.hmm|825\_aa|-|4040|6517 >NVVL01000004.1 Rickettsiales  
bacterium isolate NORP64 Contig\_source1382A\_1352, whole genome shotgun sequence  
MNLSSFITNIPSNALSVEYDLLFVLAAYFVSICFSYVMLDIADIVQKNGDENKNSWFFFG  
AITMGIGTWSMHFIWHKSIQIHMSFEVHVESLIFTIFASLITLILRVSNNKLRIFA  
GISVGITIIIMTHFICMEGMHQEMNIVYLPNLVILSVMISSLGTMAALWMMQDNIGWQF  
IVKVLGALLMGGSCVAYYVGTEATIFMPMHNNMHPMEGSQAQAWMTPAITLTIIMGI  
FIALSMYKLVLATSULLKNEEIARRKEANLRLEIKVKERTAQVEVALEKAKLANRAKSTF  
VANMSHELRTPLNAIIGLSELLVEELEEAADKEYLEPMRRINSAGRHLGLISDILDLSK  
IEAGKVELFIEEFSIKDILEEVRVIEDPIAKKNKDKLIFDYSKGDIVIKNDITKVKQILV  
NLISNACKFTTDGNVTLTVLHDKKSDRIQFIVKDTGIGVTKEQKAKIFSAFSQADSSTTK  
KFGGTGLGLSITKKICELMGGTISIGGESGKGTVFTVDLPVSIIEGVITKGTNEGANAENV  
VDAHISKIKSHQSKDLKILVIEDNDVERDLVSRVLSAGYKVSANNGEDGLKLASSPPM  
PDVIILDILLPGMNGWHVLTCLKSNPDTWGINVIVTTVLEEKNKGYTMGVSDYIVKPIDK  
KQLLGAISRYVLTNKLNSDDLKVLIVDDDPDARNILKNMLTKYKVKFDEAVDGGKALES  
IKKSKPDLIILDIMPVMDGFAVVDTLKTSSKWSDIPIINTSKRLDEEDRKKLDGGVIN  
ILQKTKQDKDSMFKLIVELVRNHKDHKDHKDHGGNKGSKDHKGNK

>gene\_236|GeneMark.hmm|527\_aa|+|6784|8367 >NVVL01000004.1 Rickettsiales  
bacterium isolate NORP64 Contig\_source1382A\_1352, whole genome shotgun sequence  
LPTGLALLIVNIHRDDFIMSEEVSSSISLFSKIRHRSKARQMLWPIRSYELKRFLPMAFLM  
LFILLNQLNLRVVKDGFVVTMIGTEVLSFIKLWVEMPIGVLFVVMYTRLCNFMTEQIFR  
IIVSIFLGFLLFAFVIFPNKELFHPDPLIVQHYIEMFPHMKWMIVMWGKWSFVLFYVMG  
ELWPMIVFSLFFWQLANKITNTQDAKRFYIFFGLIGQTNMMISGTIIVYFTQSQHLLPF  
FANITDSSEIILKSLTILVMISGVICLMLHRYIEARNINTLKGIEFKNERTDLLKLSLKE  
SVKMOVFTSKYLAICILLVSYSTSVNLIIEGLWMSRVKALHPETKDFIAYQGNVLYWTGIS  
TLIFIFIGSLVIRRFGWFWGAVITPSMIFIAGSMFFTFVLLDQLDIIFAGLTSVAPLGI  
IVFIGGLQNVLGKAKYSLFDATKEMVYIPLDKEMKTKGKAAVDIIGAKLGKSIGATVQM  
LTFTIFPAANHEDIAAGFLMVVVFVIVCMMWIYGVKLLNREYHQLLSRA

>gene\_237|GeneMark.hmm|313\_aa|+|8415|9356 >NVVL01000004.1 Rickettsiales  
bacterium isolate NORP64 Contig\_source1382A\_1352, whole genome shotgun sequence  
MTKHWFSQMALDLFNQPFMQLLYEAQTIHRANFDSNKLQISTLLSIKTGSCPENCSYCPQ  
SAHYNTGLKKEPLINIKIEVIESAKRAKEAGSTRFCMGAAWRGP HDRDLALVCDMIKEVK  
LELETCVTLGLLKEHQATMLKEAGLDFYNHNIDSSKEFYEQIITTRCFEDRIKTLDHVRN  
AGIKVCCGGIIGMGETNEDRIKMLIMLANFKDPPESVPINKLIKIPGTPLENVEDVDPFD  
FIRTIAMARILMPKSYVRIAAGRENMSDEMQUALCFFAGANSVFYGEKLLTAENPVPEKDH  
LLFERLGMSKLP

>gene\_238|GeneMark.hmm|481\_aa|+|9559|11004 >NVVL01000004.1 Rickettsiales  
bacterium isolate NORP64 Contig\_source1382A\_1352, whole genome shotgun sequence  
MSIVPITVAYGDGIGSEIMSAVMYILKESEAKIRVETIEIGEKLYKKNYSSGIANDTWES  
LERTRVLLKAPITTPQGGGYKSLNVTLRKALGLYANVRPAMSYHPFVNTLHPKLDVVVVR  
ENEEDLYAGIEYRHRNMRESVKLISRSGCEKIIRYAFEYAIKNNRHKVTGFTKDNIMKF  
SEGIFHQVFDEIAKEYPTIENEHYVDIGTARLATKPEIFDVVVTSNLFGDIISDITAEI  
SGSVGLAGSANIGKDYAMFEAIHGSAPDIAGQNIANPSGLLNGAIMMLVHIGQGEIASNI  
ENAWKKTLEDGIHTVDIYDEKTSKKGVTKEFAEEVVSFRFGQKPSKLIKATYSNAPAASS

QEFSYNIDMSEEKLVGVDIFVDIHANSADEVASKMGVIDSGSLNLKTISCKGLKLWPRD  
DEYLTESDHWCCRFPESGAITHHTQIAALMTKLSEANIDFIKSENLYEFDGNGRYSLAQG  
E

>gene\_239|GeneMark.hmm|46\_aa|-|11071|11211 >NVVL01000004.1 Rickettsiales  
bacterium isolate NORP64 Contig\_source1382A\_1352, whole genome shotgun sequence  
LGALVFIEFDDSADCWGYMKNRYNQLRFLMRFSLEATLADQKYGVF

>gene\_240|GeneMark.hmm|666\_aa|-|11227|13227 >NVVL01000004.1 Rickettsiales  
bacterium isolate NORP64 Contig\_source1382A\_1352, whole genome shotgun sequence  
MSRQVHQLRGRSGMPLHYFFSPQEIVKIWFSGNPEEQTKIKECLFSKKDTSNIGHYRDQE  
EAKARGIFAQQCIAQSRVVSSQPNVVSSKIEKVTTNLFRLYVDDEVPLEEDREFLEKRL  
SVFTQIYGRSVGADKTQYAKVINGLIKLLIHPRNNNKDFVDLLVKGAKCLVDIDKMLMI  
SMLNELATLYLTQLDHAGAVFAKVAYTLSGDFDVTIVKGNVDVIDVTIDKGNAAAYNFAL  
ALKYIKPHKSLKLLKEALIFLPEDADVKNIAIVTQILQGNEEVLFSPVNVVDNIEGQG  
FWQKALYAVYDLMQNKDSSNRFILYNLTVILKILYKNEDWEQAQKFIEIYLVNLPNPAED  
HSFIILLYEYLVYEMNGESDSASAIMERMSSFPKIAESVADRANILHGVKSESGHDYVS  
ALEYFEKIKHAATKNCYVAACEVKRGEYSELTQEYHKKQQECYEQQRAAVLAESILGTT  
IQEESPSWLVGESYHASQDNVILIEATCHLPDYAVISPKLELDEVSYAQYLSALQGGV  
VTHSNGQNGIKTLRKKVLEIKIAADSRLVTSCKYQNDAAEEVLVFDHICKNHEALQRYIN  
KSKGITTQMVPSAIPDLDSLGLDFRGELPRPDEDELKMPPPAVVQENPEDAVVVAIG  
DSEQPT

>gene\_241|GeneMark.hmm|312\_aa|-|13451|14389 >NVVL01000004.1 Rickettsiales  
bacterium isolate NORP64 Contig\_source1382A\_1352, whole genome shotgun sequence  
MGMLIDGKWTDQNQSTSADGKCFVRKQSSFRDFIGSKRFPANRYHLYISHACPWAHRAV  
VFRKLGLESIIISLVNSFMGENGWELGEGSDPINGKMYMHEIYTLADPSYTGRVSVPV  
LWDKQEGTIVNNESEIMRMFGSEFDAITKNSKDYYPENLRAEIDEVNEFVYENINNGVY  
KTGFATAQLVYETEVAKLFAALDVLEKRLSQHRYLVGNVLTADWRLFTLLRFDLVYFG  
HFKCNIRRIADYPNLSNHLRDLYQTDGVSDTVNIEHIKTHYYTSHIAINPMGIVPAGPEF  
NCSTPHDRKRF

>gene\_242|GeneMark.hmm|356\_aa|-|14418|15488 >NVVL01000004.1 Rickettsiales  
bacterium isolate NORP64 Contig\_source1382A\_1352, whole genome shotgun sequence  
MQTDIAIIGSGPVGIFAAAFQAGLLGMKSCIIDALDSPGGQCSALYPEKPIFDIPAHPEIL  
AQGLVDNLVEQAQFDPVYLLSRQVTSMQVAGMRGAGMSDAGVHDAGMHDAGGPDADGCF  
ELETSGDHSVRAKAVIIAAGAGCFGYNRPLADIKSYEDKSVFYFVDKRDKFASRKILIA  
GGGDSALDWASLASIAEVSLVHRRAKFRAAPSSVAKIHELADAGKLELITGFQLEGLSG  
KDGVLERVTLADLDGNKKHVDADILLPFFGLSQDLGPLEMGLDIKGHNIKANYPHFETN  
IPGVYAVGDVATYEGKLLKLSGFSEAAALHHAYARVFDGKALHFEYSTSKVGKK

>gene\_243|GeneMark.hmm|245\_aa|-|15880|16617 >NVVL01000004.1 Rickettsiales  
bacterium isolate NORP64 Contig\_source1382A\_1352, whole genome shotgun sequence  
MRVLLIEDDSSTARSIELALAAEGVVVDRAEVGTDGFELARLYEYCAVILDMLPDIIDGY  
EVLLRLRSKIKTPVLILSGLSSVDQKIKGLFGADDYLTKEPNKDELIARIQAIARRSK  
GHSESVRFDKVAINLDTRVVEVDGNQVHLTNKEYAILELLAMRKGTVLTKETFLNHLYS  
NLDEPEIKIIDVFVCKLRKKLSNASGGVNYIETVWGRGYMLKDYDAPTSNLLAEYAKTD

## SPAKA

>gene\_244|GeneMark.hmm|152\_aa|-|16814|17272 >NVVL01000004.1 Rickettsiales bacterium isolate NORP64 Contig\_source1382A\_1352, whole genome shotgun sequence  
MSTQAPNNEDMPHIAVNAQYIKDFSFENPGAPGTLGFEAPQIDLALDLNIQKMPEDNY  
YEVEIAINAKAVIKKEVLFIVDLKYAGVFTLINIPEEQLEMLLAVHCPAIIFFPYARKIIA  
DATQDGGFQPLMIDPVDFGVLYNKKMTEGRES

>gene\_245|GeneMark.hmm|188\_aa|-|17324|17890 >NVVL01000004.1 Rickettsiales bacterium isolate NORP64 Contig\_source1382A\_1352, whole genome shotgun sequence  
MSIMSDKWIREKSLKEAMISPFVGEQVKVAESGKIISYGLSSYGYDARVAREFKIFTNIN  
TAIVDPKNFDNDSLVTKETDVCIIPPNSFALAHTVEYFKIPSDVLVICVGKSTYARCGII  
VNVTPLPGWEGHVTLEFSNTTPLPAKIYAGEGACQFLFLKGNEQCSVSYADRAGKYMGGQ  
KGVTLPRRT

>gene\_246|GeneMark.hmm|434\_aa|+|18172|19476 >NVVL01000004.1 Rickettsiales bacterium isolate NORP64 Contig\_source1382A\_1352, whole genome shotgun sequence  
MKNSKLLLTATALLSFSAGAMEMEKPSGTPVVSDDLTVKISAFSHFQTGMRKQKNLTEK  
EKNVSAKRKTFANSESAMSLEVSNYVNDFKYGGKIVLVPTNKRKGGSFNGSHIFTETNY  
GRFEAGSPLPASYKMQVDGHDIAAAPATNWSRYVDFSTEDMMQKQSIEPSFAVVSDFFLD  
SKLATKLDNRNYSSEPARSISYYTPKFALGQSSKVQVGVSYAPDSSNTGAEKHTKVSSGL  
SIRNINKDGTDRFEIDSSVRDAVSAGITLQNFSDGIDLKVGLTGEYANASGKATKFEND  
VEKESYKLSPLRTFNIGAILNVGMSYAGSFGSLGKSLTTPFHKTRSTKYTGTVAYK  
QGPF AASVSYFKSNQYENTVDAISIGTHYVMAPGFKPYVQISTFRLKKGKPEFYKLEKKK  
TRGTVALIGVKLSL

>gene\_247|GeneMark.hmm|409\_aa|-|19796|21025 >NVVL01000004.1 Rickettsiales bacterium isolate NORP64 Contig\_source1382A\_1352, whole genome shotgun sequence  
VKNYLSISEVKVGLNFDKIIIPVGRLLVAQKHKVFEYATSFIEKGMESISPLKLPLQAGVS  
VFDRNLFEGLPGVFNDSLDPDGWGRLLFDRFMRTQSVLPEELTVLDRLAHTGNHGMGALVY  
EPDHSPEKTGDIINLNLVLAEEAQLAGSAGDVLQNLALNGSSAGARPKALIGVDASRE  
NISHGFCQLQEQEDWLVKFANSQDGNDSGAIEYVYALMALEAGVDMPDVHLFPDGKNAG  
YFAVKRFDREGTKRIHMHTACGLLHSDFRTPSLDYRDLIALTGMLTRDACQVEKMFRLAV  
FNVLAHNRDDHAKNFSFLMKESGDWKLSPAYDLTFSAGLWGEQSTMVVGEGKPNIDHLI  
KLGLEAKLSQRNIDSIIETKTALAQWKNLAKQYGVSQLNINLITTKIS

>gene\_248|GeneMark.hmm|102\_aa|-|21022|21330 >NVVL01000004.1 Rickettsiales bacterium isolate NORP64 Contig\_source1382A\_1352, whole genome shotgun sequence  
MVSLITPFEAQKKLAEAVQARRLGMELTQEGLAARSGVALPTLRKFEQKGLISLESFLKI  
LMVLGGLDDVVQAITPEKTAFFSIDDVLKANDKPTRQRGRRK

>gene\_249|GeneMark.hmm|1376\_aa|-|21656|25786 >NVVL01000004.1 Rickettsiales bacterium isolate NORP64 Contig\_source1382A\_1352, whole genome shotgun sequence  
MSQRNFYSQLGNTQDFDQIRINIASPEQIRSWSFGEITKPETINYRTFKPEKNGLFCSRI  
FGPVKDFECLCGKYKRMKYRGITCEKCGVEVTTASVRRERMGHI LAAPVAHIWFLKALP  
SRISTLLDITMKDLEKILYFENYVVVEPGMSPLQKGDLLSEDFVKAQDEYGEDNFVAMI  
GAEVRRMLSELDLELSAQLKAELAETSSETKKKKIIRLKLVENFLTSGNKPEWMVMT



VLPVIPPEIRPLVMLDGGRFATSDLNELYRRVINRNNRLKRLELKAPDIIIRNEKRMLQ  
ESVDALFDNGRRGKVVKNANKRPFKSLSDMLKGKQGRFRQNLGKRVDYSGRSVIVVGPE  
MKLHQCGLPKKMALELFKPFYISKLELYGIATTIKAACKIVEAEKVEVWDILEEVIREHP  
VLLNRAPTLHRLGIQAFEPILLIEGKAIQLHPLVCAAFNADFDGDTMSVHIPLSIEAQLEA  
RVLMMSTNNILSPANGKPIISADKDVVLGLYYLTQMLDGDIGDGMFAFNDIKEIEFALFEK  
VVTLHTKIKYRIEMLNADGEFVETLVDTTPGRVIMGQLLPKSKELDFKLLNKEMNKKNIS  
SAIDSIYRYCGQKATVIFADKIMELGFKHACQSGISFGMDDMVVPSAKTKIIKDASAVVG  
EFEKQYLEGLITYGEKFNKVDAWTACTIONDKVAASMMEEISRPEGKTKQEEFNHMMMA  
VSGARGSPAQIRQLAGMRGLMTKPSGEIIEPIKSNFKEGLTVREYFNSTHGARKGLADT  
ALKTANSGYLTRRLVDVAQDCIITDDDCGTEKGIEIKTIIDGGEVIVSLSDQILGRTVSA  
DTHHPVTGELLVAACGLIDEKLDTIESSGLDLIHVRSVLTCEKFGICARCYGRDLASG  
TLVSKGEAVGVIAAQSIGEPGTQLTMRTFHIGGAATKGTEVSSVSASYEAKVKVIGRNLV  
TNSVGAQIVMGRSCEVLLLDVKAERARYKIPYGSKLMIDDGCKVEKGQMIAEWDYPYSIP  
VITEKSGKVLFDLVEGVSIRTVVDDATGISSKVVIESRQYSKGAELAPRIQLVDAKGS  
VEVLEGEVVKHYLSVGAILSVEDGTEVAAGDILARITRESSKTRDITGGLPRVAELVEAR  
RPKDHAVIAKLDGRIEFKDYKSKRRVVLHPADGSDVVEYMLPKGRHVVVSEGDFVVRGD  
MIINGNPVLQDILKVSVEALAHYMVSEIQAVYRLQGVKIDDKHIEIIKQMLQKVEVTH  
SGSTLLPEELIDLRTLNEINDKIVKEGEPARYEPVLQGITKASLQTKSFISAASFQET  
TKVLTEASVAGKVDTLKGLKENVIVGRIPAGTGFYMSMAKKEAARKDAIIEKSKA

>gene\_250|GeneMark.hmm|1392\_aa|-|25902|30080 >NVVL01000004.1 Rickettsiales  
bacterium isolate NORP64 Contig\_source1382A\_1352, whole genome shotgun sequence  
MHRCYDEIHSQYTSVIDIEISGDLMPQPLQTSKRIRKNFGKIKLVASIPNLIEIQKKSVD  
AGFLQIDSPGDKRENKGLHSLASIFPVQDQSNATLEFVKYSFDAPKYDVEECIQRGVS  
FVAPLKVTLRLSVWDVDETTGAREIKGIKEQEVYMGDIPFMTKTGTFFVINGTERVVVSQM  
HRSPGGFFYHDDGKTHSSGKFLYSARIIPYRGSWLDIEFDAKDLMYIRIDRKRKLPVTTL  
LMAIGMGSKEILEHYDTEYDYGKKGWVDFDPARVLSHRLVNDLVDADTSEQLLEAGQ  
KITPRLAKKFAENGLKKVLCQDDLLIGSFVKGEMVDAASGEVLAELGEQITEELLGKLLS  
GGAKSVSVLKVANQGDAYIRNTLFADKNQSQDAALVDIFRVLPRGEPATVEAGQALFESL  
FFDPNRYDLSEVGRIKINSRLNIDIPLNTCLTKEDIKSIIRVLIDLKDGKNSVDDIDHL  
GNRRVRSVGLVENQFRIGLVRMEKSILERMGAVIDTVMPHDLVNSKSLALVVKEFFNT  
SQLSQFMDQTNPLSEVTHKRRMSALGPGGVSRRDRVGFVDRDVHPTHYGRVCPINETPEGQN  
IGLINSMAVYARVNKYGFIESPYRRVVDGFVTDEVIYLSAIDEGKYKIAQADMEIGAKGK  
IMADMVSCRFEFETGNFVSVVPAEIDFVDVTPMQIVSVAASLIPFLEHDDANRALMGSNMQR  
QAVPLIGAEAPFVGTGMESIVARDSGAAIMALNDGVVIEVDATRVVVQTVKPKKEGGAPEV  
DIYTLMKFRKSNHNTCINQKPLVSVGQKVSERGEIIVDGPADQGEIALGRNTLVAFIPWR  
GYNFEDAILISERIVKDDVFTSIHIEEFEIVARDTRLGPEEITRDMPNVGEESMRNLDEV  
GIVHVGAEVKPGDILVGKVTPKSESPVTPPEEKLLRAIFGEKASDVRDTSLYVPPGASGT  
VEVRVLSRRGVEKDERAVAIEKLQIEKLAKDRDDESIIIDHFVFMREKVLGEVVITGP  
KGVKPGSVIDSLLSGLSRGQYWQITVENNSVMDEIEQIKQYDEKKDQINRHFNTKVER  
LQSGDDLPPQGALKVVKVFIATKHKLQPGDKMAGRHNKGVISRIMPEEDMPFLEDGTVLD  
VVLNPLGLPSRMNVGQILETHLGWAAKNLGNVGMLEKYSNNDIDIDSMKDFVSKIYKG  
SDVAKQVKDLSKEDFIEFCGTMKDGVIYFSTPVFDGAKVEGVKSMLELAGQNSSGQVRVMD  
GRTGEYFDRSITVGYKYLKHLHLSNKHARSIGPYSVLTQQPLGGKSHFGGQRFEGEME  
VWALEAYGAAFTLQELLTVKSDDVSGRIKIYENIVKGDSNFTSGVPESFNVMIKEFRSLC  
LNVQLEKGSKSE

>gene\_251|GeneMark.hmm|123\_aa|-|30387|30758 >NVVL01000004.1 Rickettsiales bacterium isolate NORP64 Contig\_source1382A\_1352, whole genome shotgun sequence  
MADITKIAEDLSSLTVMEAADLSKMLEEKWGVSAAPVAAAAAPAAGGAAAEQTEFDVI  
LASIGDKKIEVIKAVRVITALGLKEAKGLVDGAPSPIKQAVSKSEADEIKAKLEAAGATA  
EVK

>gene\_252|GeneMark.hmm|169\_aa|-|30791|31300 >NVVL01000004.1 Rickettsiales bacterium isolate NORP64 Contig\_source1382A\_1352, whole genome shotgun sequence  
VLRSNKNCVTELEEIYKISNSVIVTHYHGLTVTEVTKLRRSLRENGASFKVVKNTLSKI  
AALNSKFAGDPPEMFAGPTAIAYSEDPVAAAKGVVEFAKSNDNLKIIGGVVNDKILDISAI  
QQLAKLPSLDALRGKIIGVLQAPATNLARVTQAPASALARVLQAYADKN

>gene\_253|GeneMark.hmm|227\_aa|-|31315|31998 >NVVL01000004.1 Rickettsiales bacterium isolate NORP64 Contig\_source1382A\_1352, whole genome shotgun sequence  
MGKKIAAVRKEIESGKEYSLKDAISVIKNSFANFKETLDVAINLNVDPRHSDQMVRGMV  
SLPSGSGKDVKVAVICKDDKVAEAKGAGADMAGSVDIIEIKSGKINFDVCIATPDMMGV  
VGQVARILGPKGMMPNPKLGTVTTDVATAVKNKSGQVEYRVEKAGVIHAGIGKIDFTEG  
DLLKNAESFIGSVIKAKPSGVKGIYMKSIFLSSTMGPSLKVDLSTIS

>gene\_254|GeneMark.hmm|143\_aa|-|32024|32455 >NVVL01000004.1 Rickettsiales bacterium isolate NORP64 Contig\_source1382A\_1352, whole genome shotgun sequence  
MAKKISGYIKLTIPSGKANPAPPVGPALGQKGVNIMEFCKAFNAATSSFEPGTPVPVVT  
VFVDKSFTFITKTPASFYLKFAKVKKGAGATKKEAYVGKVTMADCEEIAKIKMEDLNA  
NDLAAAAKIAGSAESMGIEVVK

>gene\_255|GeneMark.hmm|176\_aa|-|32501|33031 >NVVL01000004.1 Rickettsiales bacterium isolate NORP64 Contig\_source1382A\_1352, whole genome shotgun sequence  
MAKWYILHAVSGAEKSIQKMIEDQVVKKMSDLFEVVVPVVEVPEVVRGKILVEKKFM  
PGYILIKMKTDES WHLVKSVPKITGFLGSKTTPQPLSDAEAEAI FRKVAESEQASASS  
LYNAGDKVQVIDGPFDSFSGTIESVDGEGQKMKISISIFGKATPIELSFVQVKKND

>gene\_256|GeneMark.hmm|107\_aa|-|33043|33366 >NVVL01000004.1 Rickettsiales bacterium isolate NORP64 Contig\_source1382A\_1352, whole genome shotgun sequence  
LHLREKYDRSVAQLVERRSPKPKVAGSIPVTPATLLIDVGC MFKGLKSYKFFEQVKQETK  
KVVWPEKKELTTSALIVVSVFLFSIVSLIVDYGILNLVQMLLNIGK

>gene\_257|GeneMark.hmm|692\_aa|-|33424|35502 >NVVL01000004.1 Rickettsiales bacterium isolate NORP64 Contig\_source1382A\_1352, whole genome shotgun sequence  
MSEKCLKLSDVRNIGICAHIDAGKTTTTTERILYYTGKSHNIGEVHDGGATMDWMEQEQR  
GITITSAATTCFWKEKRINIIDTPGHVDFTIEVERSLRVLGDG AITVFDGVAGVEPQSETV  
WRQADKYHVPRMCFVNKLD RAGANFYRCVDMIVDR LGANPLVIQLPIGIEDEF LGVVDLV  
KMKAITWSSEGLGAEFTESEIPADLKEKAEYRAKLLDMAAEIDDAIMEKYLDGAELTED  
EIKFCIRKGTIAGKFVPITCGSAFKNKGVQPLLD DAVIDYLPSPEDIPA KAIKIDSKTGEEK  
IVKSSEEGEFSGLAFKVM TDPFVGLTFVRIYSGRIT TGSSVINTVKNQKERVGRMLLMH  
ANDREDIKEACAGDIVA IAGLKN TTTGDTLCSANAGV VLERMEFPEPVIQLAVEPKSTAD  
QERMGFALAKLASEDPSFRVSSSENGQTNIAGM GELHLEILVDRMRREFNVEANVGAP EV  
AYRETITQAHEVN YTHKKQSGGAGQFARVKIIFEPGESGSGFEFVSKVVGGSVPKEFIPG

VEKGIKSIMATGVVAGYPMIDFKATLIDGAYHDVDSSVLAFEIAAKAAFREGMPQAGAKL  
LEPVMKVEVITPEDYMGDIIGDLNSRRGSVQSMENRGNAAQIIAHVPLSEMFGYVNTLRS  
MSQGRAQYSMEFDKYAHVPTHVVDNLSKQGG

>gene\_258|GeneMark.hmm|160\_aa|-|35509|35991 >NVVL01000004.1 Rickettsiales  
bacterium isolate NORP64 Contig\_source1382A\_1352, whole genome shotgun sequence  
MSRRHAAVKRVVVPDTPKYKSVLLSKFINNLMKDGKKSIAEKIVYDAMERVEKKHGANPLE  
TFNESINNVKPYVEVSSVRVGGANYQVPSVDERRGYALAIRWLVDAQAQRSGRSMVEKL  
AEELFDAANSRGAIAKKREDTHKMAEANKAFAHFAQRQQR

>gene\_259|GeneMark.hmm|123\_aa|-|36027|36398 >NVVL01000004.1 Rickettsiales  
bacterium isolate NORP64 Contig\_source1382A\_1352, whole genome shotgun sequence  
MPTNNQLVRFGRKSKVRKTNPALRSNPFLKGVVIVKTVTPKKPNSALRKIARVRLSNG  
EYVNAYIPGEGHNLQEHSAVLVRGGRVDPDLPVVKYHIVRGALDTQGVKGRKQARSRYGVS  
AKA

>gene\_260|GeneMark.hmm|214\_aa|+|36658|37302 >NVVL01000004.1 Rickettsiales  
bacterium isolate NORP64 Contig\_source1382A\_1352, whole genome shotgun sequence  
MYEIFYSLFGYNKQLFLTINHYTNIGALPQVLQAISVFFIANFAIGYIAACVYVYKSK  
KAPNQEAYFTPIYNELVRLGACYAMFGFVFAGLKFSVNLQRPFCSLPPADFITIADTSLE  
RCLSSFPSAHTGLAILVAYCFWRHMNPALKILACLAMAVATSRVTLAMHYPADIISII  
ATLISILIGNNIYALLKNLVVRPIGKMIARLLFN

>gene\_261|GeneMark.hmm|281\_aa|-|37334|38179 >NVVL01000004.1 Rickettsiales  
bacterium isolate NORP64 Contig\_source1382A\_1352, whole genome shotgun sequence  
MGLIAGLYIVSTPIGNLGDISLRALETLKSSDVILCEDTRVSGKLLAKHGIKASLKVYND  
NSDNSLRRTIKGYIAKGMASVSLISDAGTPLISDPGYKLVRELKADGHHIDAIPGACAAIT  
ALTLSGIATDRFLFAGFLPKTKEKKKKAFFEFADLNATIVFYETANRIVSSLEVAIEVFG  
DREANIGRELTKLYQESRSEKLSVLEYYKNNPPKGEIVFTISPKSEDELSIDDIKDELS  
AKLSRGESARTASDEVFSKYKGRISRKEVYKLANQLKNEVK

>gene\_262|GeneMark.hmm|380\_aa|+|38205|39347 >NVVL01000004.1 Rickettsiales  
bacterium isolate NORP64 Contig\_source1382A\_1352, whole genome shotgun sequence  
MHNIKQKFLKYIFSVCFAFLGSCSQTGDYFKAGNAADIAILLPMSGVEAEMGMEYAKMI  
KMGIKDSAASKIKVTIYDSANQEALEDSDKILNRGTDIIIGPIYSGPTKIVAEKAGSKG  
IITISFSNNPTLAEQNLFIYGHAPMRQLEQITNYFLDNGHKNYIALLPSGKHSNVVSKIL  
REMIIDGDGILSRLELYGASPEDIKSSVKIVSETASQLNESDLNLTQPVILIADDPVTLE  
MVYANIRKYGLDKKAIAGDSRINIDSPFNTNISFTGTLGVANEKLAARARKAGVRHISF  
MHALAYDAGKMTGKYIGKRYNKEEFLTRMNSKEEFIGIAGRIHFIDSIAQRKYDVIRKEN  
GIYVGDVVKRGYGRSSPVHSR

>gene\_263|GeneMark.hmm|419\_aa|+|39598|40857 >NVVL01000004.1 Rickettsiales  
bacterium isolate NORP64 Contig\_source1382A\_1352, whole genome shotgun sequence  
MRKIVISGMIGNALEWYDYALYAQFSYIIASKFFPPSEFTDILTFVAFACGFVVRPIGGI  
LFGHIGDRYGRKMALVLGILLMAIPTAGIGLLPSYDSIGIAAPIILVLIRLVQGFSLGGE  
FSGCIAYIVEHSPADKRLAGSASFVSMCLGMLLGLIVANVFTYVLSEEDLLSWGWRVPF  
VAGLFIGLVGLYIRSHLSESPYKAAKAQGALSRTPLRETLTKYWREVLIAITIYINVT

PFYTTTTVFIKNYMQTLGYANEQGSVLCALILITLIITFPISAHISDKIGRKPVIVWASVA  
LVIMIYPIFLALHSMNYVIAILSQVLFAAIVGVYMGVPVPTLLVELFPTRVRFTGVAISYN  
LSAAIFGGTAPMVGAALYQFTGEQISLAYYLTLGLAFFCLCTLYFYKETYRNDLAGDYNT

>gene\_264|GeneMark.hmm|224\_aa|+|40854|41528 >NVVL01000004.1 Rickettsiales  
bacterium isolate NORP64 Contig\_source1382A\_1352, whole genome shotgun sequence  
MNDNIFEVPEGENKVLHSCCAPCSGPLIEKIVNDGIDLTIFFYNPNIHPKKEYEIRKQE  
NIRFAEKLGLAFVDADYDVQNWFSRAKGMERDPERGRRCTMCFDMRFERTALYAKENDFK  
IFTSSLGISRWKNMEQINECGVRAASHYPGTTYWTFNWRKNGGSARMYELAKEEEFYKQE  
YCGCIYSLRDTNDWRVKNDRSEIAIGEEFYREKLQNTEKTSQNS

>gene\_265|GeneMark.hmm|333\_aa|+|41530|42531 >NVVL01000004.1 Rickettsiales  
bacterium isolate NORP64 Contig\_source1382A\_1352, whole genome shotgun sequence  
MSDSHDFPTTDKPHKMNNSSSSDKPPQMSNSSSSDNLRKTSGWLNIIKPRGISSAKAVSL  
IKRAFRGSKIGHTGTLDLEAEGVLPPIAIGEATKLVSLIDAKKRYNFTVKFGAKTDTADS  
AGKVIETSNHIPSEEECHKICSQFIGKVEQIPPAYSALKVNGQRAYKLARAGEEVKLAKR  
CITYDLKCTSVDHEAQTASYVCDCKGTYIRTLAEDISLSLQSLGFVLQLRRLKVG MFD  
AASAVDISDYMTIDFAEATAFLQNKCLKIEDVLDIPVLEASESQTQKIRFGQNCQFEDD  
QDYDLVWVRHNSRIVAIGSLLSNNFKSSRVFNL

>gene\_266|GeneMark.hmm|91\_aa|+|42542|42817 >NVVL01000004.1 Rickettsiales  
bacterium isolate NORP64 Contig\_source1382A\_1352, whole genome shotgun sequence  
MTMSITQKRKTDLIKEYATVANDTGSVEVQCAVLTERIKNLTDLHLENFKDFSSRRGLLI  
LVGRRRSLLSYLKKQSTDYAVLIAKGLR

>gene\_267|GeneMark.hmm|141\_aa|+|43150|43575 >NVVL01000004.1 Rickettsiales  
bacterium isolate NORP64 Contig\_source1382A\_1352, whole genome shotgun sequence  
MLSTWLFAGITVHCLIGCVIGEIIIGLSIGVTMQLHPVATMALATILAFITGMILLATTSV  
VRNRKTTYMLAIRIVWLGEVVSISVMEIVMNGVDYIYGGVGAQSITDPIFWKGLLFAIPA  
GYFAALPVNYLIKKNLKCH

>gene\_268|GeneMark.hmm|358\_aa|-|43723|44799 >NVVL01000004.1 Rickettsiales  
bacterium isolate NORP64 Contig\_source1382A\_1352, whole genome shotgun sequence  
MKINKPINLRSDTTTPQTQNIIDAMTSTPVEDAAYGEDMATNELSEYCKELFQVEDAVFL  
TGGMLANRLAIASQTSPGDEVITHHNYHINFFDSAGNAKINNVVLNCNHNPTGVLSAHDV  
EEAINSKPRYHMCSQVKLITIENSINGFNGKIYPFGKQVELYKYTKDRDINLHLDGARIF  
NAHIETKIPLAEYAKHTDTMSFCFAKGLGAPFGSMMLGRKEVIEKVRIMQIWLGSYHQI  
GYANAAKYALQNNIPRLSDDNKNTKILADKIKSLPHIKLILPYPETNLTFSIKELGVS  
NDIFLDECKKLG LLLFPWLEGQIRAVVHLAVSHSDIKQAAKIIETVILDTLPLTKVRG

>gene\_269|GeneMark.hmm|590\_aa|-|44810|46582 >NVVL01000004.1 Rickettsiales  
bacterium isolate NORP64 Contig\_source1382A\_1352, whole genome shotgun sequence  
VTETRLYNFRKVFAFIILKLLPPFKFNIFVMLLVVAMIWAFDLSFRQYIIKNILNGLVGSEG  
VGVAEQIWQPACMYIFMALLITTTFRAYGYFVDVRMCPALRQNIKFAFQKLLTHSHVY  
QSNFAGSLTHKVNNTDSIIELVKLSIDRFFGCSLALILSIYTLFLVNINFALVTLIWAG  
ISTIMSIFYFQKLSLDRDYSASSASVSANIADSLINITTIRLFHSRFSEYKLFKVKCRK  
KLIAERKFNWTFLLIWCIHGYSFNFLQIISLYFLIDGYQAGTITIGDFALVIGLNLEIVD

FLNRLVKELALFSDHYGRVVDALSTIFIDSELQDQIDAKPLKVASGKISFDKISFAYEGK  
KPLFDNFSVTINPKQKVGLVGYSGSGKSSFINLILRFLDLAGKIIDGQSITEVKQHSL  
RQKLAVVPQDLILFHNTLIANIRYGKFDASDEEIRASRFAGIHEFISGLPCGYDTIVGE  
KGIKLSGGERQRVLIARAFIKNAPILLLDEATNQLDSITEQEIQNSLFLKLMEDKTTIVIA  
HRLSTLLHMDRILVFEQ GKIVQDGT HDELIVQGGLYRKLWNAQSNDMIRY

>gene\_270|GeneMark.hmm|340\_aa|-|46601|47623 >NVVL0100004.1 Rickettsiales  
bacterium isolate NORP64 Contig\_source1382A\_1352, whole genome shotgun sequence  
LKKMNFLLDQDGFVVIKNIPEKAIESCTYHIKDAINQASAEKVDVADYLHATGRWATKS  
PITRIANIVDQDIEARLAELCSSKIIQKSNVICKTADLVDAIPFHQDISYSRRDPYHF  
SVWLALNDVDKNSGALQVIKNSHTLPIEPAADFWSPLYFSDKSNQEKGAQSIEVSAGDAI  
IFDSRLWHGSNKNFAGKDRFAYVTRWSIPGKGYDPEIPEVAEKFGMFNCGHMTDEILQKS  
LLLYEKQPPEYELPTKEKLVKWDILQKKGDVLNKVGALNEGSSLNIDSSLAIQHLKSL  
RVLHLAHDAGNISGEVYKNLWFSLLSPLGKKIQLLKI

>gene\_271|GeneMark.hmm|260\_aa|-|47620|48402 >NVVL0100004.1 Rickettsiales  
bacterium isolate NORP64 Contig\_source1382A\_1352, whole genome shotgun sequence  
MQNMQYEKTSQNLLEQMNIKISPCRSFHTLAGSPIYQARFRAVEKFKPGFAPVYDK  
DSDRNNKDSGYHIDFTGKALYKRRFTKVFYCDRATVADQNEYFHIDITGSKAHDHSYQ  
WAGNYQEDVCVVRQNNQFFHVDMEGREIYSEKYDYAGDFKDDIAVIYRNGQASHINNEGR  
LIHDRWYKKGVLGKGYANAEDNNGWFHINREGKAIYEQRYKMVEPFYNGLAKVETFDGH  
LGQIDVMGRMLVNIYTHKID

>gene\_272|GeneMark.hmm|755\_aa|-|48363|50630 >NVVL0100004.1 Rickettsiales  
bacterium isolate NORP64 Contig\_source1382A\_1352, whole genome shotgun sequence  
MLSQKLADRHEVQVFARYEDSFLADFHYTELDSLDPRIILLNVLNIPLTKYRYRFVNEQV  
DIRFQKILEEFKPDIVHFHGLNHLSSLPSIAAKLNIPTIYTLHDFWLMCARGRFIQRNS  
KQILQPCDCQEDQKCAEQCYSGYFTGDESSAETDLAYWQQWIATRMQHTKGIIEHIDHFI  
SPSKFLMNKFITDFDIPQDKLSYLDYGFDLERLSARKRQKDKQFVFGYIGTHTPEKGVLDL  
LLRAFENITSDAHLRIWGAEREETKALKQISNQLPDHIRDKIEWMGSYKNENIVSDVFNH  
LDSIIVPSIWGENSPLVIHEAQQLRIPVITSDHGGMAEYVRDGVNGLLFKHRDES DLTA  
MQKLSGDKNLYQKLTQTGYLYSKDGGQIPEIGDHVAAVEKLYISA AKKKGKQISTKPGPWR  
ITFDTNPDYCNFACVMCECFSPYSNVKEDKKARGIKPKIMPIATIRKIIIEASNTPLREI  
IPSTMGEPLMYKHFDEIINMCHEFGLKMNLTTNGSFVVKGARKWAELLVPILSDIKISWN  
GATKETHEKIMKGSKWEDVTRNLQTFLEVRDEYLEKTGKTCSVTLQLTFLESNLMELYDL  
VKMAINLGVDRIKGHHLWAHFEEIKDLSMRKNSDSIRRNWKEVNRIYELRDQMLLPSGAK  
IKLENFTILENDGVKDLAPGGACPLGKEAVVNPEGKFSPPCAPDELRESLGVFGNVNDT  
KIGDIWQGDKYRDLQKNYLNLDLCKTCNMRKPLVS

>gene\_273|GeneMark.hmm|337\_aa|-|50605|51618 >NVVL0100004.1 Rickettsiales  
bacterium isolate NORP64 Contig\_source1382A\_1352, whole genome shotgun sequence  
MKKILITGGAGLIGSALNKELVGQGYGVVSCDIRFNDNPLSFFSQEIKPLLAQCSGIIHL  
AAISRVIHGEEHPELCQEVNVDGTIKLLEFYKDLPHKPWFYIGSSREYVYQQETLPVSEN  
APLKPVN NYARGKVLIEQQVSGLREFGFNTAILRFSNVYGGMLDHYDRVIPAFCLKALRG  
EQIRIEGKECVDFDTHLEDVGGIALAVGV LQKGAPLES AIHFTGGRGCNLEELANMILK  
ITESNSQINYYPARNFVGRFYGDYSMATKLLGWRPQYSLEEGHLKFIYDIQHHSVNCYPY  
NVGMRVYENIESYSWLPTILQCGIRNIHSDALAETGR

>gene\_274|GeneMark.hmm|904\_aa|-|52269|54983 >NVVL01000004.1 Rickettsiales bacterium isolate NORP64 Contig\_source1382A\_1352, whole genome shotgun sequence  
MSTLSFSTEYVHGSYEETKVPSPGDACGSNQLPQLEWPLPLTSGLSLITDQEWSELNLLA  
ANQRWEQLKAALEEKGRAEKMFPKWIKVLTILLNRTYLQKDLDEGLNALVAQRDYQQIDI  
ELIKQLASMGSDVNYTFRGQIPDSALQIAVRSQVSLIKTLLESGEERAVVKNKYNENN  
KNEHILYSAIQLGDLELVIYLLQYNILDSCQIACRKYDKDTLVDCAILSDLEKALQIIP  
RLFAAGYSFGSVENLMQHGELDYLDKILLDLLKWGLSVDDGVKYGMTLFLEDRDEGYDP  
KPFMYAIKMLQFFLGKGGKIPEELSASLDERLQKLVKIAKIADDLYSGNPLSAPLSLED  
IELKLLKEATEALFQVLALPEDTDQQTALDLARALRGQDLGSFTRNIDLTNTGRVLDLD  
LAIALRGQDLGSFTRNIDQTQALDLTNTGRALDLRQMEKAVKTIKTIKTLALARVLKY  
TDELEYTDELEYTAKALKYADRALKDADRALKDAYRVLALKDAYRVLALKDAHRALED  
AYRALEDVYQALEYTDRAKALKYAAKDLQYAVLALVLKDADQALVIKCVDAQALDAALALK  
ESDSKLIVPRLLRLWSRDGQSEYPTFDEFINWCEGQSLQLIFGGLPLTLRNAQSDLMFLE  
DWIIQKLVGTQNSMPLIVSLQNKNSAEPVLDRIINKYIEIFPTLEPLIEQCIQTGV  
TYSSLSMEQPNDSVSGSKRLREEVPHQRVRRKLNPDGSLVNQSPVEEMLEILQRGIGSY  
LVS NKPEVLATLSMHQEARTLLDKVVNNCLPCNLKTAILDWCDLQKAIYSPSADTLEWA  
GSKIQESQYENAGLKDENARLQGENARLQERLKALLEPQLDDVHMHEAPDLIGSSDTPEA  
PDFL

>gene\_275|GeneMark.hmm|102\_aa|-|55175|55483 >NVVL01000004.1 Rickettsiales bacterium isolate NORP64 Contig\_source1382A\_1352, whole genome shotgun sequence  
MSLKKGRAYKPIVRIEFTRIISDKSTAETRYITSLPAKALYISKAIRSHGGGENSLHWV  
LDVIFNEDQSRIRKGHAPANISAVRHIALNILKSAQKLCWRH

>gene\_276|GeneMark.hmm|117\_aa|-|55906|56259 >NVVL01000004.1 Rickettsiales bacterium isolate NORP64 Contig\_source1382A\_1352, whole genome shotgun sequence  
MTRAKAGKISKNRHKKIIMAKGYRGRANKCFKIAIEKVEKALQYAYRDRRNRKRDFRGL  
WIQRINA AVRQHDMIYSTFMGGMKKAGIEVDKMLAEMAVNDPASFTHIVEQVKKAK

>gene\_277|GeneMark.hmm|66\_aa|-|56284|56484 >NVVL01000004.1 Rickettsiales bacterium isolate NORP64 Contig\_source1382A\_1352, whole genome shotgun sequence  
MPKMKTHSGAKKRFKLTASGKVKSAQAGQHFMRRRTKSQLRNQRGTAVLCEPDAKRLKK  
IFLPNG

>gene\_278|GeneMark.hmm|391\_aa|+|56904|58079 >NVVL01000004.1 Rickettsiales bacterium isolate NORP64 Contig\_source1382A\_1352, whole genome shotgun sequence  
MEELFALKNVYELYTGHRVLVTLFIMLTGFYPMMLMIMKKIISPRVDKIIKTRSKNSTRII  
EKHRITARLIQVFIAYVLMFWGDILDDLTLMSLIRIKDS AISIYLVTTISSVLLTAIN  
IGVDLHGSRKTFNHTAIELHTHILKIFITACASLSIISVILGISISSLFTSLGAAAALLT  
FVFKDVLGLLASVQLTFQNIIRIGDWWVSLPSYGADGDIEKITITVVVIRNFDKTCCTVP  
TSAFLNTGVKNWRMTMFESGGRIKRAISLDMDTIKICSQEHLDKFRKMPCM TDFAKNNKH  
MFDKNETTNIITMFRYVVEEYLKSHQDIHQEGFTFLVRQLNPTPTGIPLELYVFTKDTAW  
ANYEAIQASIFDHLLGGLAKFELRAFQTVIR

>gene\_279|GeneMark.hmm|643\_aa|-|58182|60113 >NVVL01000004.1 Rickettsiales bacterium isolate NORP64 Contig\_source1382A\_1352, whole genome shotgun sequence

MKNKLLYLLVALFLACPVSYARMQTLQDAALQYDFYNRDTKIHKDGTHESIVEIQITLLR  
EQAREFVAKYTMGYNSDSSSVQILEAKTIFQGKEYKVTDMIEDKPVANNRAGFDEIKQI  
AISFPKPEVGATIYLYKEITNKVLIDKEFFAKYAFGTGGYWKKSNVTINSEIPLLVELN  
DPYKLLLLTTENPADKKGYFHKINLKLSPINMPINEVAGSALNHKRITYVSLASLDKW  
SNLGDKLAVKYNEVLEQSLPDVFLDIAKAAEKEGVAKKEGALEKEEDIVARINKITMLS  
KKVQYCGDWRSINGRLVPQDLAKVAEKQLGDCKDFSTITVKILRHLGYEAHVALVLRGAG  
MQAYDEKFPMSNFNHAILKVISKGGKTYWIDPTNVVSMADGIFPDIAGKSSLVLARGGA  
SYEEIPDVAEAHAKTIIVNAVSLDNVGSNNIQLLEDAMS LTGARLYASAQHIEDWVFN  
FFSVFIPKEARISSSIPNLNSRVVTPITISLGYNPMSMFHKTNIGLAYRLEGGSLGADM  
LDMDIKGSVNDLYLGNPRTMQRTTIFKNNKIRNLKELNFNFS SAHLTLARECVIKGEDSI  
ITDKMITHKAWMENSYIKSAEFKQLQDIFREN RNISVVMVKDE

>gene\_280|GeneMark.hmm|462\_aa|-|124|1512 >NVVL01000005.1 Rickettsiales  
bacterium isolate NORP64 Contig\_source1382A\_1394, whole genome shotgun sequence  
MAEYRVETDSIGEIKVESNYWGAQTQRSIGNFKIADQKMPKEMIRALAILKRSAAKVHS  
EIGALDIHIAAAIIESADRVLAGEFDDNFPLVVWQTGSGTQSNMNMNEVLAGIANEKLGTG  
EKGGKSPVHPNDHVNMGQSSNDVFPTAMHIATVLQSNELLIPALEKMHKSLDNKAKDWDG  
IVKIGRTHLQDATPVSLGQEFSGYAYQIKYSLERVGHSLARVHYLAQGGTAVGTGINCKA  
GFAEKFAEEVSKFTGYKFTAPNKFEALACNDALVEFSGLNSIAVSMMKIANDIRLLGS  
GPRCGLGELNLPANEPGSSIMPGKVNPTQCEAMTMVAAQVMGNHVAVSIGGSNGHFELNV  
FKPLIQQNVTHSIRLLSDAMNSLVSNCIDGIEPNIERINDLRDKSLMLVTALNPHIGYDN  
AAKIAKKAFIEGTSLEAAIASGVISSEDFDKYVVPQDMIGK

>gene\_281|GeneMark.hmm|207\_aa|-|1522|2145 >NVVL01000005.1 Rickettsiales  
bacterium isolate NORP64 Contig\_source1382A\_1394, whole genome shotgun sequence  
MTRTIELSQALSACLHDLAAGSIAIDNCLSMICGQDTSIAKQAKVIAESEINLVSHLR  
LLRAAYGASAEVSVISIMKLLTDFEDKKTENLHFEEKLIFLDTQIAKAVMCLIVI  
AAESGAMRGVLDVHVNINASEFKIISRKILKLEDNAQILEGDLDAPIDVGNCREHYI  
GRICAQNGYIVSVNQTDIEIYNLKKK

>gene\_282|GeneMark.hmm|468\_aa|-|2162|3568 >NVVL01000005.1 Rickettsiales  
bacterium isolate NORP64 Contig\_source1382A\_1394, whole genome shotgun sequence  
LFRFERIVIMENFDVVVIGGGPGGYVAAIRAAQLGQKTALIEKEHLGGICLNWGCIPTKA  
LLKSAELYQMKHSEYGISAGNVGFDLQKIVKRSRDISGKLVGGIAGLLKKNKVTVIEG  
AAKIESPTQISVDGKTTVAKNIIIATGARARVLEGFEPNGGNIWSYREALVPKTPKSM  
VVVGSGAIGVEFASFYNAIGVDVTVLEAADRILPVEDSEISSMARKAFESKGIKFKTG VV  
LKEQKSGKNSVEIIFEHGGKKEVIKSEILLMAVGISGNVENIGLEKIKVKLDRGHIVTNG  
LMQTSQKGVYAIGDVAGAPWLAHKASHEGVIAAEMIAGKKPHQITKTNIPGCTYSSPQIA  
SVGLTEEAADGREIKIGRFPFYGNAKAMILGDGDGMIKTIFDAKTGEMLGSHMIGSDV  
TELIQGYVVAKEMEGTEEDLMNTIFPHPTLSEMMYESVLQAYNKQIHI

>gene\_283|GeneMark.hmm|416\_aa|-|3561|4811 >NVVL01000005.1 Rickettsiales  
bacterium isolate NORP64 Contig\_source1382A\_1394, whole genome shotgun sequence  
MPIKILMPALSPTMEHGNLAKWTKKEGDSVKAGEVIAEIE TDKATMEVEAVDEGV LAKIM  
VPEGAQEVVNSLIGVLLEEDDKAALAAFIEKESAAGTVASEPKKEEK PAPAASIPAAS  
PSSAAPKTEMVRPAGARIFASPLAKRIAKMEGIALANVTGSGPHGRIIKADLLNIGTKRG

TISRHKEEYRLVPNNNIRKIIAKRLVESKQTPHPFYLSNECMMDSVLEIRAQLNASFGDD  
KSKKLSVNDVFILATAKALMDIPEANASWSDDAIMMYNNVDISIAVAIDGGLITPVIRNA  
DQKEITTISSEMKDLAKRARANSLKPEEFQGGGFSISNLGMYGVKSFNAIINPPQGCILA  
VGMSSKRAVVINDKIETRMIMDVNLSCDHRVVDGAVGALFLAAFKKYIESPILMFV

>gene\_284|GeneMark.hmm|333\_aa|-|4861|5862 >NVVL01000005.1 Rickettsiales  
bacterium isolate NORP64 Contig\_source1382A\_1394, whole genome shotgun sequence  
VKDKRFMKEITVREALRDAMTEEMRRDEKVFVMGEEVAEYQGAYKITQGMLEEFGAKRVI  
DTPITEHGFTGLAVGAAGGLRPIVEFMTFNFAMQAFDQIINSAAKTNYMSGGQIGCPIV  
FRGANGAAARVGAQHSQNFAATYAHVPGLKVIAPYSAEDAKGLLISAIRDDNPVIFLENE  
IMYGRSFETPEIVEPIEIGKAKILREGEDVTILAFSIQVGMALAAADILAEAGISAEVID  
LRTIKPLDEEAIIESVVKTNRLVVVEEGWFFGGIGATISAIVMREAFDHLDPVEVVAGK  
DVPLPYAENLEKMSLPTVEDIVEAAKQACYREM

>gene\_285|GeneMark.hmm|325\_aa|-|5859|6836 >NVVL01000005.1 Rickettsiales  
bacterium isolate NORP64 Contig\_source1382A\_1394, whole genome shotgun sequence  
MFEQKKYKLPPEEYVDSFEKMLLIRRFEEKCGQFYGMGLIGGFCHLYIGQEAVIAGITLA  
KDEKDISTITSYRDHGHIIIMSGADPKYVMAELMGRSSGCSRKGKGGSMHLFNKDGKFGYGGNG  
IVGAQVPIGTGLGFAEQYNGTNNLCFTFFGDGATNQGQVYAFNMAALWKLPIVYVIENN  
EYSMGTSLERSTAMTDLYRKGESFNIPGFQADGMDIDAVYNATIQAQTEFVRGGNGPVILE  
VKTYRYRGHSMSDPAQYRSKEEVEEYKQRDPVESAKKIILDNDYASADQVKEIEKRVKAK  
IAEVAEFATSEFPSEDELYTDIFR

>gene\_286|GeneMark.hmm|116\_aa|+|7039|7389 >NVVL01000005.1 Rickettsiales  
bacterium isolate NORP64 Contig\_source1382A\_1394, whole genome shotgun sequence  
MYPAAISKARDFYETILGLEVGNIFKHPNDGFWIEYDLPEGGCLAISNLDTGRTPSPNS  
GGAIAFEVEDLDIIIADLKSVDVQFKLEKFTTEMCSIAVILDPEGNAILHLQLKRK

>gene\_287|GeneMark.hmm|78\_aa|+|7401|7637 >NVVL01000005.1 Rickettsiales  
bacterium isolate NORP64 Contig\_source1382A\_1394, whole genome shotgun sequence  
MKKILIIASSLILLASCSNKAKNSLGITETLPDEYQVTRNKSLEIPPHYHLNAPVNDNKN  
TGKKKLSEAENKLLKEIK

>gene\_288|GeneMark.hmm|432\_aa|-|7665|8963 >NVVL01000005.1 Rickettsiales  
bacterium isolate NORP64 Contig\_source1382A\_1394, whole genome shotgun sequence  
MAGSRARHVIKESHPDWKAFKGRAARDVLFVSRFAYKQHDAQMDELADKMPDGYEMFLMTD  
HLDDTKEASFRCAAFMNWQTKEVVFATAGTRLGRDVS KMGSDFDALLAASQKPRKLN  
AQVLNDMILDSLGAEASEYKFHYTGHS LGAAEMAQVDM DIKLTQRDLKAGEEQISAVT  
FENPGTKKILSGMYKDAGLPAESAENRLYEFNNRPNMINSLEQAGEVYVIEPNSQKEN  
PSLIQMVIEFVTKKDKETSPFVGWVISLLEKGCDSYVKNPLAGQVIGLLEQGLNLYSDH  
KLDNFDEVFVQKEGRVTKNGELITVEEAYSQVPMYDEQIASRVVQLKKEEGDTGKQEY  
AMNHINPETGEVSRILCGREELEVAVALIQSEIGNAMQNIARKAPTALKSKEESRFELP  
SAAEIVKDGLER

>gene\_289|GeneMark.hmm|137\_aa|-|9148|9561 >NVVL01000005.1 Rickettsiales  
bacterium isolate NORP64 Contig\_source1382A\_1394, whole genome shotgun sequence  
MKKMFAGLLFVVTVCVFSMSSVLAGDVVDSTGKERKAIKSKAKESVQAGSKARSVVFPC



IKNKLLVKTkHPVINHKKEEEDDEFSEDKKLELNSEETKAKTKANTQVKGKTKPKITT  
KTTTKIKTAKAEPEATK

>gene\_290|GeneMark.hmm|1074\_aa|-|9743|12967 >NVVL01000005.1 Rickettsiales  
bacterium isolate NORP64 Contig\_source1382A\_1394, whole genome shotgun sequence  
MASDSDSNAEGTSLIEEDLNSLNFQLEGVASLPSELPEVKNVRRREVPTGVGGEYDAGSS  
FFPESYAPQSVPLDNLLVALETIGNIKNGNLEPSVVLTTFAELARLGKRSQAYVDELSGD  
QADFDLSIREFQTQIVFLERRLDGALEKKGALETVITRAQFKLGDLDLQSFTEEQEKNLAL  
GVRIQDLGGRLRKYESTYDDSDAPGLSRNSSVADYDVSLRDDLRSEVQVISLKNSNADLL  
IRAEFAEEECARQQDKIQAQSQEIKDQNKIQDQNKIQDQNKIEIQDQSQKIEREYISNG  
ILQADLKERERITNSVSVLKEKASIDSGGNTRRDSQPMLDMLGHLVNRFEVDGKNGAP  
SSDNGVDRLAVTAEAGQRRSSLADILVAEDLQQDRQNSTIADLRDQLKVAVAENQGLSQ  
LLSQLSEATSEGLAKLSSGSLDVVASIAGKLSSVYALETRIDTLGRENNDLRGKVFTL  
EDAADLVADHRKQLEGLSAQHTAELEAARSRVSELEQTAETYGADMAALREQLAAAQRQ  
ATEATEAEAEAAQKRVGELEQAAGQLENLRGQLAEAKEELEKKETALGELCNQLATARRE  
AWEATQRATGAEAAQCVAELAALQAANDKTTAERRLVFLRAEVGEYKQVIAGQREVMQES  
RAKLEEAUYEAGCYRIAKDETFALLKDSWKEKDELERQLEEFQWIADEARQAALDAQLEE  
AARQALAVAVAAAAALAAAQQRADTEAAHRVEAERLLNEALMTPEIREALRRLIEARARRE  
AEAQQRREAEEEQRRIAAEAAEEQPEAPEQQVAEQVAEPDVAVEALSEPRVLTALKVALP  
DGVELKEGLEVPGNAQKFVFNVEFEYVEQFAHIDALPSVDQGVSLQAQQQQQPIKGGVLF  
EEGIPPAQPPAEFVSDDEVVAKSGKIAAERLEAMKQAASATASDATSEHGGDVALNGSG  
AMLLAQQEVATEGSFKEAVDEQLLGTAAKQSFQAAQVVENNEDGLVGIMDTLMRAVSMMP  
SPSFGSQPIHSQEANKRRNQDEKRSASPGDASSAKKKPAKDKKPESESPAPSA

>gene\_291|GeneMark.hmm|606\_aa|-|13661|15481 >NVVL01000005.1 Rickettsiales  
bacterium isolate NORP64 Contig\_source1382A\_1394, whole genome shotgun sequence  
MHKILQFTQINNFSVMTKQLTSEPALSLGSTLRKCAFLFRKQKQLQSLFLVFLVLSGII  
PSVDSLFLQNITDAIEGFSKDLQQTNLVEMLFKWWIYALWWEGLNILWRVYDYAYLKI  
MPKIKAQVIDEFYDHIQHHSHEFFQNNLAGDISNRITEASRSLEMVFAFANEKIIRKLSV  
ILFAMLTLYSVHIIASIFLAWVVLFVGSLLFARTINNYSTIYGKDKALVAGKIVDSIS  
NISAIRMFASHRFERRYITHTLSLVKSDQSMQWFMFKLRYFLGTSCTLMICAMIFYIIT  
LRNLDISIGQCVLVITLCLAVIADTWDLTQEFGLDFEQVGSFNQSMSLLEKCAITDHPD  
AKPLIVKEPRIEFQNVTFKYNNNSNSFNKSLIITPCERIGLVGFSGSGKSTFTSLISRL  
YEIESGKIMIDGQDISKVSLETLRQNSIIPQEPILFHRISIRENIAYGKLGASDEEIRQA  
AKSAHIDEFITNLPKGYDTICGERGNNFSGGQRQRIVARALLKEAPILILDEATNSLDT  
HTEKLIQSSLQQLMEGKTVLVIAHRLSTLLHMDRILVFDKGHVVEDGTHAKLRKNADLYK  
TLWDNY

>gene\_292|GeneMark.hmm|222\_aa|-|15581|16249 >NVVL01000005.1 Rickettsiales  
bacterium isolate NORP64 Contig\_source1382A\_1394, whole genome shotgun sequence  
LNCALGFPGATVSICISQKVFMSRKRVDNALEDSSRPHKKQIVQGQQDHPDQSSPSAI  
QDASNSSDSLTYLIDQLFAEPILGSTRYSKEKKSYSMEIVQKYFPDKTLNPVALEPPLEV  
LRVLSLEQIEPPKAPLVPRAIPELEPEPEPAPAAPSVPVIKCSFPLDAREFFVFDEGVHG  
EPSEAPSSDFIFWQFEYYCAEPSVDRLLVGVLDHTDFPWF

>gene\_293|GeneMark.hmm|399\_aa|-|16407|17606 >NVVL01000005.1 Rickettsiales  
bacterium isolate NORP64 Contig\_source1382A\_1394, whole genome shotgun sequence

LQPNKKLVQVSNQAFLATPDFPTFLDFSVLSGSPGLPGCMSFPGYAGFPGFDPDCVPPGL  
TAPPASHSDGNSVSQAAEHSAKPDLGPPALPSISKHNSSELNHAISSYLKSAVEISNEL  
ETALRQRLNGTDRDSNACKKPLIYLLSEGANKWDQNKGLVIKLLAEGDKIDELNNRGIIS  
SGVINSEITALMHTCGAGSSRINLEAFKFLSQDADITACNYRGWNVVDYIIRGRFVILA  
FEALLDHCREHKKFPVSLDLIESCLNNSFIREKNKSKCIKVLKLYLTKNKADLSQNDFER  
ALEMVKSPSFEHAPEVDEVAELSEASGAPPDSFCLTPVSPEDSKSSFCLTPVSPEAQL  
SLFTPHVPPCFNQVIAPPALISAGMLGLSDPLSIFEFLO

>gene\_294|GeneMark.hmm|599\_aa|-|17837|19636 >NVVL01000005.1 Rickettsiales  
bacterium isolate NORP64 Contig\_source1382A\_1394, whole genome shotgun sequence  
MTPIFYIKGGILNFGDKNIFSELELYVSKGDRICLVGKNGCGKSSLMKIIDGEYELDSGE  
LFQDPVVNVGYLKQDVKERPECTIYDFVMSGFKDPENNKYHADIILKQMEIDGTLMFNNC  
SGGQVRRVCLAKTLDKPDILLDEPTNHLDIKAEWLETYKGYEGAVICISHDRMFQE  
NITNKVWWIDRGVLRKSNKGFKHYDQWHQEIIESEEAVLHKMNRKLNKAEKSWLQGGVTGR  
RKRNVKRLANLQSLRENLQEHQSRLTNAKARLKIELAEEMKKTKEIIEANNISYNFPGKR  
LFNNTFKVKKGEKIGVIGSNGSGKSTLIRILTKELEPQEGKVKHGTNIDITYLDQHRTE  
LNPKHSKQTLCPGGDQIFLQNKTMHVAGYKQFMFDPKTLDSKVSTLSGGESNRLLLA  
KILMNPGNFLILDEPTNDLDMDSLEMLLEILAEYKGTLIIVSHDRDFLERLVTRTLVFAQ  
NEVIDLYGGYEDYLYHRKEEKISKPKKVSTPATQEKSSKPQRLSYKYARLLEVLPEEIE  
QIEQRIVTIENKLAEPGFYNADNRQFSLTKELEKIKLELDVKMEQWLEVEAMQGDISE

>gene\_295|GeneMark.hmm|434\_aa|+|19790|21094 >NVVL01000005.1 Rickettsiales  
bacterium isolate NORP64 Contig\_source1382A\_1394, whole genome shotgun sequence  
MSNMELAEFAAEELDKNPFIEDDNITVESSEPKKEQNDKEKICQTELRTDLGPTTVRGGK  
DYSSQDYLANIATEKSLKEHITEQINLSFNDSKDKIIAYYLLDSMLSTGYLGITLNEAAI  
MLRCDEKIIVRVLKLQNFDPVGFARNLRECLTIQLQEQEDTDYALLTMVQNIDLIATG  
NFKKLAKLCGIDIANIGEMIKKIKSLNPKPANGFFFEQTSYKIPDVILTFTNDEHVKLET  
NTESMPRLRVNLEYLLKIKNTVEKKEERHFATKTEVESANAIKVSIRQRSQTILKSKAIT  
EQQMDFFTRGVMYLPMTLNEIAAITGFNESTISRSTANKYISTPTGIFELKYFFSSSLG  
TTRSASDNVSSTKVKEIKQIIASEEDGEILSDDEISEQLSKFNISARRTVAKYREAIG  
LPSSSIRKRNKQMA

>gene\_296|GeneMark.hmm|1387\_aa|-|21201|25364 >NVVL01000005.1 Rickettsiales  
bacterium isolate NORP64 Contig\_source1382A\_1394, whole genome shotgun sequence  
VGDGDGGSVIGQSEAPDLNDVGEPEKGLYWEHHALPSQDKEGDGIPQSYGSLCLKVKEI  
VGNLDDEDSIKNLSNSCISIDLGLVDVASLAEGVNGLISLLYEYKMTHEFPALLQLCEE  
PVLPDFGSYSLASTPAGSTAPSRQGSVRISSLSAQSSVRDLAEMFSGTACSTMNSQTGGA  
YDPFQPNDSFVADNATFSTRFYKDIRSSEHILTEDDIDVLTKKLESEDLDYGYVFDLLTE  
KLELPYNQQDFSIVQSYSTLIITCITELAKSNGLQTGDFEQIKAFLLKGVVSLESIVESL  
LSLEPCGNSKLYNYMETLLFDNKQYITEKKAHTMFCAMQEYNNQCIAHKQPVIHIPESLL  
NKLSDENFNHYLSTGLSRSSISIDEVRKQNFQDQGRFYNIAYALNTANVSSGSLNVSDLA  
AKWHLSSGEIFAIMELCSKVEDSEYDDVLELPKLMKCLLRAHKLKDWCDLAQAAVALPLG  
ENQLDQRILSLLIHSSPTEEILREVATKLPEICDDRMRRAELEKQGISLTD FMWLLNNGR  
LDCNGDLVFASSYYEGLSKDGLSKLLKLSIGPVDFSWSERLDGEIMESALFNLDDAIDL  
PKLKPFAFEARKHARDLFSKIRDIEGDKDSQSSLEISKWLQGGNVKALSCKLYDVAFLKRI  
PLSEVCDLLPTIGIDDRIQLVLKINQITISPEDMILLGAYDCNVTAHIEDLEGKNLLEYM  
VARMFHGEDFKVNLALATVDLAI PNAPLNLNQDQLGYVTGMILNSGQDAVSAADTLMT

LAKNSGIDGLYAVLWCGGKRDYVMSKIDEANHQTILDELISRVSKERIASVLNEFSPHLR  
EVQTAYEALIRDKAGDYTRAAGVLYEVYTRCVDTENLEEELEEKILES LGTFAKPVVAPIP  
GYKVLQKLRDQINANRAKRNQDQTGDEESGFDSKQLSTLEGLDSDDAKMWEVPQTTFGTS  
DEPPESWSGGFSLLDESLDELATDDESESGYSSYEPSDESDSGADADVESDSDRDYPDDD  
FEDDQLGQFFPPGKAPTAPPPLLAHGAQGVGVANPPPLPEFPAPKKVEIPPAPPPHVPP  
HVPPQVQPPEVPPQVPPQVPPPHAPAPQVLPLPQRPELKFPELHHLAPVVEFAHEYKVE  
GGESGSGGPRGPESETVEPKIVTLLKQQVKQGAGSLILEPDTGSLVASLFEVSAAHEAGF  
GFDSAARYKAELSFSLASPLKNLEQVTLEKTVRRAEEIVPEEEKQKAAALPANFAVEAD  
KSVDMKTPGKERLKDIEDPLLLKEEVLPAALLGVSAMKPGEEQPEDSEEDLTGKILLER  
KQSVSDLEYAIALIQSLLAGRSPPPSTPKTLGERRKFGLFNWLLSMLMMFINIGLIAMSF  
KKAAGR

>gene\_297|GeneMark.hmm|660\_aa|-|25939|27921 >NVVL01000005.1 Rickettsiales  
bacterium isolate NORP64 Contig\_source1382A\_1394, whole genome shotgun sequence  
MNNNTKNILVWIAIFVVMITTISALQDDNTRIGTERLAFSDFLNRVDERQVNSVVIQGRW  
VRGSLSDGTAFTTYAPDYPGLIDKLSMNGVYIDVSPDPTKMNSLFSIFVSWFPMLLLIGV  
WVFFMKQMGGGKGLGFGRSKAKLISDKGNKITFKNVAGIDEAKEELAEIVDFLRNPGKF  
QSLGARIPKGCLLVGPPGTGKTLARAIAGEAKVPPFSISGSDVEMFVGVGASRVRDMF  
EQGKKNAPCIIFIDEIDAVGRHRGVGLGGGNDEREQTLNQMVLVEMDGFESNEGVIIAAT  
NRPDVLDPALLRPGRFDRQITVSNPNINGREEILKVHAKKIKCAKDVEFRVARGTPGFS  
GAQLANLINEAALSAARLGKKIVDMTDFDEAKDKILMGPERKSMAMTEEEKNGTAYHEGG  
HALVSLYCPSLDPIHKATIIPRGRALGMVMSLPEKDQISVTCEKIKAQIAMALGGRVAEE  
VIFGSENVTTGASSDIKAATSYATHMVTEVGLSAKVGPIFHGRSHEDNYIAGAGDKTRSE  
KTSELIDSEISRIIEGYETATRILTDHVDQLHILAKALMEYETLSGKQIKHLLLNPID  
TEETPEFPAGLKKKPKSKAKVAARSASSAGDVMGVVEKALERKGRSLKKPAPVPPKGAKE

>gene\_298|GeneMark.hmm|432\_aa|-|27934|29232 >NVVL01000005.1 Rickettsiales  
bacterium isolate NORP64 Contig\_source1382A\_1394, whole genome shotgun sequence  
MPSTRFDDKITNSLGTIPPGKIAIAVSGGSDSVALMHLASIWARGAGVQLVILSDHNLNR  
AGSKDEIRYIAKLARDLGHEFYPLSWDCGGSKVALQERARQGRYDLMTSKCHDLGIDILL  
TAHHMDDMFETYLMRKS KSSILGLSSTDEFFHNNIRILRPLSGCSKAELVHYLEQNNIG  
WLEDESNRSDAYERNRIRKQLALYTRPEKLELAQEIAGVNNQASVLNERLIIAMAELLSI  
NEYGFAMIDLAGLKKERCIDIQIPILNYILTVISGKTATPRFRSIRKLLAKLAHNEKIDSS  
LHGCILKETSGLLIYREYS AIDKIKMPVDFAKNNYWDGRFEIISPQSCDGYIIDCLKFS  
DYIELKDKINLKNLAKISDNNHKSILFTLSAIRREKIVAIPNISYYDSSGLEISFEVIF  
RPSFISRFTHFL

>gene\_299|GeneMark.hmm|524\_aa|-|29376|30950 >NVVL01000005.1 Rickettsiales  
bacterium isolate NORP64 Contig\_source1382A\_1394, whole genome shotgun sequence  
MTKETQNTYDETPYHSYPYAQSSPERLATLGALFGMDAPKIETARVLELGCAEGGNLIPH  
AMHNPKGEYVGVDSLKVQIDAGIKNVKALGLKNVDLKHCSIMDIDKSFGKFDYIVCHGVL  
SWVPDVVREKIFKVVNENLTENGIAYISYNTLPGWNMVRTIRDMMMLYHSKNFQDPNEKVT  
QSRALLEFVKDSLKNADTPYAKTLTKEAELLAQGDHYLRHDHLEDENKQYFFNEFMAEA  
GKNGMQYLSDCSLSSMYLGNMGKEIAEKLKDLNDIVRTEQYMDFITNRRFRSTLLCHKGV  
KLNRA LNNNDAKKFALSFNITPEKSLDKLASKDPLKFYFKGNKEQYITTSSPWLKAIL  
YTFIENGGYPLKFDTIIEKANKKFKTDSKAQIEADLLKNVMNLVIKGYIDISLIERTSDK  
VKVDKPKISDLAFYQANNTNNTWVTNLYHAPVGINLFDKFKALKYMDGKNTKQQILELLIK

DVKDGGKINMSKDKKKIEDPAQIKKELIAHLGHTVNRLLTTQGLFV

>gene\_300|GeneMark.hmm|249\_aa|-|30982|31731 >NVVL01000005.1 Rickettsiales  
bacterium isolate NORP64 Contig\_source1382A\_1394, whole genome shotgun sequence  
MIKSIKQSGIVALLSAVTLSSAAHANDEISADDRYFYIGTEYGISDPVVKFQDKDTKT  
DVEMKRSTMYGGRIGYSFYPGMMIEISATHQPKYKLGVLHPDGLPKAVPGTTDMSTN  
VFTANLIYELPKKFAQLQPYVIFGAGVSRISIKSASSSVPGPQGNMEIFRIKNQTANYFT  
YQLGVBVTRDLGANLSLDLGRVQVNNLKLKYDALDKITHVVKAQKPIKKTIAVGEFTI  
GLTFKIPVK

>gene\_301|GeneMark.hmm|428\_aa|+|32241|33527 >NVVL01000005.1 Rickettsiales  
bacterium isolate NORP64 Contig\_source1382A\_1394, whole genome shotgun sequence  
MIFIYNLLSLLFPYLLVLLVRLCKKKENLKSILQRHSLMPSRDPGQLVWIHAASVGE  
SMVALTLIKAISTEHPKMNFLVTTGTLSAGLLANWLPSNAQHQAQHQDAQHQFVPIDN  
ILIVRFLKHWRPKLGFIESEFWPCLINESAKNFDLILANARLSDRSFARWQKRRGIFN  
FITSKFKTILVQSKTDLKYQNLGCGRAINLGNLKFANKELEVDTEKLASLKSIFGDKKI  
FLASSTHKEDEEVTLKIISLQKNIDYYPHILRHPERVGELAKACAQLGLKFSIRSKS  
PAPSLGDDLYVDSFGELGLFYSLAYISFIGGSFKHGGHNLVEPAYFDNVILLGPDMSNF  
QNIADDMTSHKAAIQVRNAEELAEQIEFFLDEKNSKERSLYSANAQNFVDSRKETLNNYL  
TAIDKFLK

>gene\_302|GeneMark.hmm|333\_aa|+|33658|34659 >NVVL01000005.1 Rickettsiales  
bacterium isolate NORP64 Contig\_source1382A\_1394, whole genome shotgun sequence  
MIKLLYPKFWSKRGLISFALIPFSWIYQLLGLVLRKKFASPIRLSQMVICVGNMMSVGGTGK  
TQITLWLAKVFRKKNIKFVIVTKGYGSSLRGAKLVTPDCAADVDESILLQEIAPVIAA  
KTVHAALPIIRELNPDVVFDDGMQNPFIKLNILVIDSARAAGNWRIFPAGPLRENVN  
SAINRSDIIMIGSKPCNDFELVQAVTSSQKTIFNAGMNLTLHDASKQYYAFTAIGDPE  
RFYRLLAENNLISLGRSFPDHHNYTPEEIEELKNIKENDCSLITTKKDYVKISDNNGN  
GDSGDIICADVALDFENEANLLDKINEKLHKKK

>gene\_303|GeneMark.hmm|292\_aa|+|34634|35512 >NVVL01000005.1 Rickettsiales  
bacterium isolate NORP64 Contig\_source1382A\_1394, whole genome shotgun sequence  
MKSYYKKAHIVEYVLFLLITSALRLLSIDNSANLCSFIARKIGPSLKATSVARKNLQRI  
LGNEVDTKTIDDLWDNYGRYIGEFPFINKMTDQEIEQRVKCIGIEKLFQDNKQPFLL  
LLAHQANWEFIIRRAKDLYPQFGVVYRKANNPYVNKILKERNNDIIIMIEKGANGTRSL  
IKAISKMSIAMLVDQKMNEGINVPFFGHAMTAPAIARLSLQDYPIVPCQMIRIDGTS  
SFELVIHSPLEYDATGDTQKDCYDIMLMINQTIIEGWIRQKPAQWFWFHNRWK

>gene\_304|GeneMark.hmm|381\_aa|+|35576|36721 >NVVL01000005.1 Rickettsiales  
bacterium isolate NORP64 Contig\_source1382A\_1394, whole genome shotgun sequence  
MINKDVLPILDKLSIFQSVTPKGEDALQYIAELLSKLGFECHLKNFGSGAKETSPLYAVL  
GDCAPNICFAGHVDVPPMSLDLWNSDPFKMTVKDDIYGRGTVDMMKALACGLAATLEF  
FKQHKPTGSISFLTSDEEGDATYGTKMMLEHIKNYTPKIDLCLLGEPTTKTIGDTIKI  
GRRGSVNFALTVSGKQGHVAYPEKAINPIPIMTNILKDLSEKEFDSGSEFFQKSNLEITS  
VDTGNQVTNVIVQSLSAKFNIRFNEKHTAASLNSEIEQIVKKHCDNYDLQYSSSSAPFIQ  
KYSERMKKFTQIVQDNCGVIPDVETGGGTSARFIHPFAEVVEFGLNCDPAHKINEHTKI  
SDLQILYNVYYDSLVEFLTQR

>gene\_305|GeneMark.hmm|439\_aa|+|36946|38265 >NVVL01000005.1 Rickettsiales bacterium isolate NORP64 Contig\_source1382A\_1394, whole genome shotgun sequence  
MNIAELKKDKTNYHAKVTIPNKEIEELDKELSKAAKTAKMDGFRVKGKVPVSVLRKKYAP  
SIRSDVMREKINAAIDETIKKGSLSIAGNPSIEDLLNEEGKDLEFTLKFELLPEISLPDF  
KKFSIEKPKLEISEKDIDKQIEELAGYSKTYDTEVKAKAKKGDQVTLDAVGYYVDGKAFDG  
GKLEGHKLVLGSNSFIPGFEDQLIGSKTGDDVSVKVDKFPKEYHSDLAGKPSFKVVKVIA  
VHKESKVKIDDEFKQCDTLDKLEQISKNMQLSFAEPIHTMMKMKLFDQLESGLKFD  
APKSLLEKEKSMIKSQIESMGSEDPETKDMSEKEKEAYFDRLASRRVRIGLMIAEYVKKK  
QLQIAEEDIRQAIMAQARNYPGQEQVIEFYQKDRNAFESLKGPILEEKGVKAIFEKEVT  
LKEKTSKEKLEKLLQEEV

>gene\_306|GeneMark.hmm|74\_aa|+|38566|38790 >NVVL01000005.1 Rickettsiales bacterium isolate NORP64 Contig\_source1382A\_1394, whole genome shotgun sequence  
MQNFIKLLAVSLLLTCYGTSDKNPSPKSSGKASSSASKHISNHASRVASTAASR  
AAAVTRAANKISRP

>gene\_307|GeneMark.hmm|182\_aa|+|39070|39618 >NVVL01000005.1 Rickettsiales bacterium isolate NORP64 Contig\_source1382A\_1394, whole genome shotgun sequence  
LLIYKMETSLARKFSVVLAVFIAFVSNASAATRSRPGHLPLRSADAREYRTHKTNDLFKS  
YLELSSFRHKIIAQNLANVNTPGYKADEVSMVQYSDLAGSGQVVRKIGMIRTSNRHIAS  
KKGAAGRFSSHKLHDPYEIKKNGNNVLSLQIQIGLSENKNDYAAVVKGYATTNSLFSSAI  
GK

>gene\_308|GeneMark.hmm|164\_aa|+|39624|40118 >NVVL01000005.1 Rickettsiales bacterium isolate NORP64 Contig\_source1382A\_1394, whole genome shotgun sequence  
MKKLFVFIILAWVTLACTTLGCTSTALADDLKKAASIASYGTRFQAERIKIAAENIANES  
STAALPGDPPYRRKVLFAENRYSKRLGTHVIRTKKIGFDKSAFITKYDPHHPAADSEGMV  
KYPNINRIERADASEAQRGYEANLSVIEMTNSLRQKTIEAMGR

>gene\_309|GeneMark.hmm|144\_aa|+|40121|40555 >NVVL01000005.1 Rickettsiales bacterium isolate NORP64 Contig\_source1382A\_1394, whole genome shotgun sequence  
MAVDSVLSAQNSYMQVQNRPKLAPINTQMSQAVDFHRMVDQQFNSFSKMSPAQILAHIQ  
GVRGSGASSTDFQAREQSVASTITKTIRETVGKQEEVTRKSLIGEASMVELLTATTEAKN  
LMDATVKVRDEFKAFDKVINMSM

>gene\_310|GeneMark.hmm|60\_aa|-|40623|40805 >NVVL01000005.1 Rickettsiales bacterium isolate NORP64 Contig\_source1382A\_1394, whole genome shotgun sequence  
MFGIEVGVDMAIVVVFLLINLGVGLYGGQGVKNIKDYALGGRNFSTATLTATVIASWTVF

>gene\_311|GeneMark.hmm|113\_aa|-|40916|41257 >NVVL01000005.1 Rickettsiales bacterium isolate NORP64 Contig\_source1382A\_1394, whole genome shotgun sequence  
MPDQPFSSRLPNRHCDRIIFIAYNKLLPHMKKESDDSPILLILLSARNLFLIENMMMPKA  
ILMTLIDLKEIELHLYNHGFNIKNGKSELTLKPYTANGIVRIKQSASSLGLSI

>gene\_312|GeneMark.hmm|287\_aa|-|41447|42310 >NVVL01000005.1 Rickettsiales bacterium isolate NORP64 Contig\_source1382A\_1394, whole genome shotgun sequence

MLSNNREKNNREKWQVELEELRQEWNLWEGDPMETPTSIIIFARYKNQPAALKISNSAS  
EHTSAVLKHYNGYGAARILKNRGRITLMKRCVPGVSLKDLTLNNEDEKATHILCDVIEKL  
HSNVEFEGNYRFTHEFTQFFDHYLNSGDKQIPTKLIKASAFADLKDSKEKQILLHGDL  
HHENIYDQKQGWLAIDPKGFVGEACYEVAFLRNPIDSEICLSHNIKRRIIDICTRLG  
YDKLRVLSLAFAQSILAAVQFIEDGYKYENALQVAKNLEAQELHLRV

>gene\_313|GeneMark.hmm|212\_aa|-|42324|42962 >NVVL01000005.1 Rickettsiales  
bacterium isolate NORP64 Contig\_source1382A\_1394, whole genome shotgun sequence  
MRTIISIFLIFSLWAPASYAGNADTKKLGEYIENLINEGHKMFNNKKMSQTDRYHKTKL  
IEGHLYLDWMAKYTLGRHRRTIDKKKISEFSATYAKFIVKVYADLSVHYNGEKARLRKIK  
QIDDNLFIVNTVVIKPADQDTIKIDYLVHEINETGDDPYRVGDIITEGILNSQQAEFN  
SVISTRGIDALIVDLQERINRAPALAPAGSDV

>gene\_314|GeneMark.hmm|256\_aa|-|43142|43912 >NVVL01000005.1 Rickettsiales  
bacterium isolate NORP64 Contig\_source1382A\_1394, whole genome shotgun sequence  
MRLSIRSIFNPILLALCCIIANNTYAAKSSDKADNYSYNYASINNKCVYDPYESFNRI  
FMINGILDAFTLRPIAKIYGKLTDPDYTKSRVGSFLKNINEPLSTVNYGAQGNAGGIFKTF  
WRFAINSTFGVLGMFVDVASKVGLKVEPQTFGSTLAHYGMGAGPYIVLPIFGGMGARDVMD  
PLISGRMNPIKYLMSDFKYSITGTSVVHNRDEIMPFTDHVSKNSPDPYIAIRNAILSQR  
EDKMVYQDGFKCPVVK

>gene\_315|GeneMark.hmm|342\_aa|-|43922|44950 >NVVL01000005.1 Rickettsiales  
bacterium isolate NORP64 Contig\_source1382A\_1394, whole genome shotgun sequence  
MIRNLFSSACSAIKSFFSGLMQIPAWIRQQITCARGNFASLRRLNDLTGSNMELGIYHL  
YEQNFYDAIFRFKMVDKFLKPGDAAANYWLGWVYLLRREHKSIICLSKADKADEVGLLP  
FVKSIDSVSIIPDAICALHRDIIANKFTDKIPVGKVSTDKTNSKTENLPKSLVLALNEAI  
TELPDKYSILELGSNIGLLSYEINKRMQESYDLTGVEASSRMINLQQEESYDKTIHSSVN  
SFLSKCSDQYDVIVSLEGLAFVAKLEDIFSKIHSILKPNGYFAFSIPVLDKNIFLDSLE  
FAYNKPDIEHQLKKNGFNIVSISEINLEIKNNYSIFVCTKRI

>gene\_316|GeneMark.hmm|400\_aa|+|45062|46264 >NVVL01000005.1 Rickettsiales  
bacterium isolate NORP64 Contig\_source1382A\_1394, whole genome shotgun sequence  
MSLIATRLKVKPSPTLAVTAKAKELRARGINIISLAAGEPDFDTPESIKAAAIQGIKDG  
ATKYTNVSGTPELKKAIIDKFKRDNNLDYTPDEVIVGTGGKQVIYNLFMATLDEGDEVII  
PAPYWVSYPDMVLLAGGTPVAVSSDMETGFRARPADIEAAITGKTKWLILNSPSNPSGAT  
YTASELEELAAIMRKNPKLHVMCDDMYEHIFDEFTFNTLATIAPDLKERIFIVNGVSKA  
YSMTGWRIGYGAGDKDIVKAMSIIQSQSTSNPSSISQIAATEALNGVQDFIEVNARNFQE  
KRDVLVSKINAIDGLDCYKSEGAFFYLPKCSDFGKKT PNGDVLSSSNDVATYLLEIANV  
AIVPGIAFGLEGYFRISYATSRELLTDACDRISKAVMQLS

>gene\_317|GeneMark.hmm|224\_aa|+|46284|46958 >NVVL01000005.1 Rickettsiales  
bacterium isolate NORP64 Contig\_source1382A\_1394, whole genome shotgun sequence  
MIKRSFKHFLKNSALVHELACILFLYLKLVYITTSWEFVWEDGISPEIIRKEDGILFAM  
WHNRLAFGMYYKYDYENVYALVSSHTDGKLITDVIRKMKYSVIEGSTNRNPTGAVRGIK  
AITNGGQVVITPDGPRGPVYKINSNITKLGHKYSKAVIPVSCMASKYFRLKSWDGMIMIPK  
PFGRVVVTIARPLPLSGDDEKDSKSLLEEALTKLSAQASCELQGI

>gene\_318|GeneMark.hmm|506\_aa|+|47171|48691 >NVVL01000005.1 Rickettsiales bacterium isolate NORP64 Contig\_source1382A\_1394, whole genome shotgun sequence  
MATPSEKLAESLTVLKQLQEDGNVAIRSTNLARTHRRERLLKNGFLQEIMKGWYITNPSE  
RAGDSTAWYTSFWSFCSSYLQERFGENWCLSPEQSLLLHVNRTVTPKQLLVRSDKAHNSV  
IQLPYATSILEICANQPDPHIIVQDGLRIYSIQYALISCPASFYQQNPTDVRAALTMIRD  
ASEILELLIEGSHHTIAGRLAGAFRNIGQERIADDIITTMRSIGYDVREQDPFEKKTPSL  
ILNTAEHSPYVNRKLMWQEMREPIIEIFPKSLGLTQNIDTYLQDIEANYTTDAYHLSI  
EGYKVSPELITKVHTGNWNPVKEDKQDYNALAARGYWQAYRSVRESLIAVLNGENSGDVA  
GRDHRNWyremfLPSVtAGIIPIDLAGYRSAPVYIRQSMHVPPAKSIRELLPAFFDLL  
RTETEASVRIVLGHFLFVYIHPYMDGNRIGRFLMNVMCASGGYPWLTVPVEKRDLYMNT  
LEKASTSSDIKPFahFIGSLVEGKSG

>gene\_319|GeneMark.hmm|709\_aa|-|48990|51119 >NVVL01000005.1 Rickettsiales bacterium isolate NORP64 Contig\_source1382A\_1394, whole genome shotgun sequence  
MYNVFFQPVKTLIPMKEMAAKALNRLGIRNLRDLVFKPTSYNISDISSDFTKIRDGILI  
QAEVTIEAIDRPLSRRSPIKIYTSNDTGSLLVFFNKIPPIYSKIRVGNKCIVSGRVQR  
FDGFYQITHPDFIFKQTLsAPVQPVYPLTYGIVNKQLYGYIMDGIKILETAINARISFKK  
FDDENEKIYIENLLFEIKLHLIGAPSDSSEIDRSIEESLAKLAEKELFAGQVALAKLKR  
KELIVKGRSFPVSEKIKQQVLNKLGFQLTEAQEEAIREIESNQASNHQMMRLLQGDVGS  
KTLVALLMINVAASGAQSALMVPTDLLSMQHFAFFKQALDGTSINPAVLTGKSTAKERR  
LIQAGLESGEIDILIGTHALFQSTVEYKDLGFVVIDEQHRFGVEQRLELIAKASHPDVLV  
MTATPIPRSLTLMFGDMSVSHVRTKPKNRLPIITTIISGTKKPALIESLQKKLTLGEKI  
YWVCPLIDQNDKSLEKDEGSSRTGVAKAGSDAGSDAAYASVVERFAELNAAYPGLASMLH  
GKMKSAEKDEIMQKFKNGEIKILVATTVIEVGIDVPDATLIIIEAIEKFGLAQLHQLRGR  
VGRGELQSHSMLMYNHKRLSNTSKKRLEIMRKSNDGFYISEQDLLLLRGGGEILGTKQSGE  
PDIFFADLGRDLKILIQANKSAANAEFSEFVEFQTQLFARDREELAQSG

>gene\_320|GeneMark.hmm|264\_aa|-|51139|51933 >NVVL01000005.1 Rickettsiales bacterium isolate NORP64 Contig\_source1382A\_1394, whole genome shotgun sequence  
MIKQHLEDHYNIGKLYNSYLISSDNIEMALAEVEGFVSTYLLEKTGESLRGNADYMIVQK  
ESKTTKNIAVDQIRAMQKFLYKTSIVSGVKIAVIYAADQMNLNSANSCLKILEDTTANTH  
IFLLTENASALLPTIRSRCALINHHYDDGAKYSIDERFVKPLLKSTPLSERLAFIAEFSV  
KDRGLWIEFSSAAESLVAKFSMQFAGVASDLSLREVFQAQFKSDSPEYLQMKYDQIGEI  
IKNTNFDLDRASCALLIDKFRS

>gene\_321|GeneMark.hmm|460\_aa|-|51930|53312 >NVVL01000005.1 Rickettsiales bacterium isolate NORP64 Contig\_source1382A\_1394, whole genome shotgun sequence  
MTVRTRFAPSPTGYLHIGGARTALFNLYLFAKHGGGEFLLRVEDTDAARQADSAKQAILDS  
MEWLGLVPDEEIVYQTNNAARHVEVARALVDAGKAYYCFTPQAEIVAMREAAYAAKEHFI  
FHSPWRDASAESYPKDVKPVVRLKAPEDGETIVDDLQGGKVVVQNSHLDDMVLLRGDGT  
TYMLAVVVDDHDMGITHIIRGDDHLNNASRQQLIYVAMGWDVPMVHIPLIHGTGAKLS  
KRHGALGASEYKDMGYLPEALNNYLLRLGWSHGDDDEISRAQAIEWFGVGGMGKSPSRID  
FDKMKHLNATYMRAMDNEALSEMVFSNIDEPISEESCGYIRLGMESLKVRAELVTDLCDL  
AGMYIVDRPLVISAEAKEIRESDVSLIDQVSKGLGELKEFDKDNIAQTLKEIAKQNDLK  
LGGLMKYVRAFIAGRTASPSIFEMIAILGKDNSIARLKNR

>gene\_322|GeneMark.hmm|84\_aa|-|53512|53766 >NVVL01000005.1 Rickettsiales  
bacterium isolate NORP64 Contig\_source1382A\_1394, whole genome shotgun sequence  
MIYEIENLQKARGVLSGVDGGVILSNPQGSTRYYGMRVIDHIFQTLKQEFPTKIEGFIVN  
ADDYSAFTTAHALGYRTICYSKK

>gene\_323|GeneMark.hmm|171\_aa|-|53785|54300 >NVVL01000005.1 Rickettsiales  
bacterium isolate NORP64 Contig\_source1382A\_1394, whole genome shotgun sequence  
MTHGGKRPKAGRPRGQGRYGTTHKAIRVPEYLADEVIDFALNRYKIPLLRIANIRVGS  
LVADHIEDTVDMNSLLIKNPETTFMRAEGLSMSDARIYDGDILLVDSSITPVDGKMOVVA  
SIDSALTVKPLSYIDGKPYLLPENPSLDPIPVLNPELHIWGVVTNVLKSL

>gene\_324|GeneMark.hmm|78\_aa|-|54391|54627 >NVVL01000005.1 Rickettsiales  
bacterium isolate NORP64 Contig\_source1382A\_1394, whole genome shotgun sequence  
MSEVIAVDQLRQYISRIEKLESDKADIADIKQVFDEAKANGFDTKIMKQVMKLRKLDKE  
SLAEQEAILDLYRAALDL

>gene\_325|GeneMark.hmm|178\_aa|+|54832|55368 >NVVL01000005.1 Rickettsiales  
bacterium isolate NORP64 Contig\_source1382A\_1394, whole genome shotgun sequence  
MLLLMVVFALLQVGLVWAVIASKRKVDTKNMQLIQFYLDTKFLCKGLIDSLKFPESLTFC  
NRFTSELKEYFNLEEIIVDSVDMPPANNANTVLKDRVIEFIEKNMDHIARGLHDFKFTTF  
ILELDGKEYVLHISRILSKGEGDGFIIICIELAPSLLSKNEIATLETCINILRTRLVYE

>gene\_326|GeneMark.hmm|278\_aa|+|55446|56282 >NVVL01000005.1 Rickettsiales  
bacterium isolate NORP64 Contig\_source1382A\_1394, whole genome shotgun sequence  
MTQKTPLPLGQKTEYISQYDNSLLFSISRARDEIGLSTLLPFAGMDIWNCEYVSWLSP  
SGKPNVRIMRFVVAADSEYLIESKSLKLYLNSLNNSKFRSEAELLTIERDLSAAANSEV  
HATFHRLDSFNEQSLATFSGINLDDLDVEISDYNVNSALLTLAHGNERASETLYSNLLKS  
NCLVTQQPDWASVQIQYSGRKISHESLLKYLIIFRNHNEFHEQCVEHIFNDIMQKCPDS  
LTVHAKYTRRGVDINPYRSTKNPVETVDVNLSDARQ

>gene\_327|GeneMark.hmm|193\_aa|-|56458|57039 >NVVL01000005.1 Rickettsiales  
bacterium isolate NORP64 Contig\_source1382A\_1394, whole genome shotgun sequence  
MNNTKMRKIIVGISGSSGAIYGVRLLEMLKELGIESHLIISKAHLTIAAETHSPAIEK  
KLASYSYNPADIGARISSGFRDGMIIAPCSMKTLIAIANGYEDNLIARAASVVMKEQK  
KLALMTRETPLHAIHLENMLKLSRAGVAIVPPVPAFYNKPSTIDEIVTHSVVRVLDLFDI  
ETSAIVRWNGIAP

>gene\_328|GeneMark.hmm|274\_aa|+|57443|58267 >NVVL01000005.1 Rickettsiales  
bacterium isolate NORP64 Contig\_source1382A\_1394, whole genome shotgun sequence  
MTTTRIPDEVITELTNQIAVLKQELTRRDDFFTYIHHEINGLIHNIHFTSDVLSNSWDKL  
RPDHIKEYIDIIFESAELYKITSTDLFDAARFNQDDLQRSFAKVDLAELIIDIIERCNKI  
FLVQKDLQIIFKNTKNKPVVWNGDDKKLRQVLYNLLVNAIKYSKRGTINVSLESAHQEGA  
PQEGTHKNGTHQDGAPAWQVNIQDQGMGIPESDLESVFTPYFRVTKNNKTIPGYGLGLSF  
CKRLIDAHSGQIWVRNNQNDVGVTFQIPAFAT

>gene\_329|GeneMark.hmm|170\_aa|-|58408|58920 >NVVL01000005.1 Rickettsiales  
bacterium isolate NORP64 Contig\_source1382A\_1394, whole genome shotgun sequence



LLYDSGKHEMASPKKFTPAERKGGKAKASYKEWFGQAKEFLIGSLKLRPSENAIGRNIRAF  
MLHQACENAFIASSLVFKDDRRKLHDLVELEKGVAVEPEFLRSFPKETKRDKHIFDLIK  
KAYIDARYKKYYEVDEEELTEMAEMVKNFHNLVKELCLRKIESFVENNEA

>gene\_330|GeneMark.hmm|80\_aa|+|3|245 >NVVL01000006.1 Rickettsiales  
bacterium isolate NORP64 Contig\_source1382A\_1705, whole genome shotgun sequence  
RFLHGGTNEVKEQREVPFMIWFSDKYKAAYPEKWAAVQSFGRKDISHDYVFHSILDCIGI  
ESDAINKSLSVCHRKKDDKK

>gene\_331|GeneMark.hmm|520\_aa|+|287|1849 >NVVL01000006.1 Rickettsiales  
bacterium isolate NORP64 Contig\_source1382A\_1705, whole genome shotgun sequence  
MFNFIQKQLDIKIIFAVFVAVIYCVLFNSPVLIIYKFGFYKANMWTAPLEIAKDFIYLVV  
TLFAFFFGLSVHRVIFIAGAIILFVTGAIASYLFFFSIAPTLNIMPTIFGTHATEVYEL  
VSLRLVGVVLFSLAVCLYGRHFNVKTSDFSFLTILSAVCLFYVAGNVTSPKFSFLKTYF  
PVQYLHNSYVFFFGHSKNLTKEDISLKYSFKDSSDDGVLGVLVIGESARHDLRLGNGYER  
KTPPNLAKMDVVSLKAQSCATSTYYSVPCMLSRNLNMKMDLVDSETTFLSVLTRLGFNTI  
WLGSQSITKGYRNRKGGSFYETDFHMIPGGSLVLRPNALDVTLPYMEQNLSTKKQFV  
VLHSTGSHWNYSKRHTKEFAKFTPAIDSSLIKKDAAGCSLEALNNSYDNSILYTDFFLSR  
VIAKIKDRKSFLIYSSDHGTSLENGRFLHGGEMHLKEQREVPFIWFSDKYKAAHPKKW  
AAVQSLRGKDISHDYLFHSILDCIGIESDAIDKSLSVCKK

>gene\_332|GeneMark.hmm|34\_aa|-|1891|1995 >NVVL01000006.1 Rickettsiales  
bacterium isolate NORP64 Contig\_source1382A\_1705, whole genome shotgun sequence  
LSLKAYSFEFIYELIADNLSASQDYTKVKTRYAA

>gene\_333|GeneMark.hmm|384\_aa|+|1997|3151 >NVVL01000006.1 Rickettsiales  
bacterium isolate NORP64 Contig\_source1382A\_1705, whole genome shotgun sequence  
MKFYIIAGETSGDYIGLLIDAIIKAERRGSASDGAEEFFGIGGNNMRKAGLDSLFPIDQ  
INIMGFFEILPQILRIKKLIDLAARDIIRKNPQILVTIDAPGFTFRVAKKVRELAPEIKL  
VHIVAPSVWAYKPGRAAKYAKLYDHLLTLLPFEPQYFTKLGLESTCIGHPILEQTFFKKS  
PALKAEMGCDKDAKLIAITPGSRKGEIARHMPVIRQACDLLACTHKIKAIQVQPDSDNIH  
QISSFLSGAKFDYFSTDRLKAFASDCALAKSGTNSLEIAASKTPMIVGYKMHMPSFFL  
LKMMIKVKYASLINIIPNREIPEYIQSEFNKDNIFALSQILNDKKRAQDQVKGAEKIL  
ESIGFSNGEKPSEIAAKIIIKMIS

>gene\_334|GeneMark.hmm|681\_aa|+|3151|5196 >NVVL01000006.1 Rickettsiales  
bacterium isolate NORP64 Contig\_source1382A\_1705, whole genome shotgun sequence  
MIAHYLSKKLQDEYHNLNLWYFVSFIFGIILFFKFTPIFTLNTIFTILFGTIILSRIFYK  
RDLLFFLSACILSSSAGMLTSYVRMSSVSASTNPIKRPMISRLTGEVERIKPTLQGMQV  
TIKNVVLERNITKKRGNLKKIRIHISNKLRSKLGHNKLRFKAKLFPQTSLVPGTYDF  
GFYMYMSGIEASGYALTPPEILSKNESTGSKYIQTIRNKVYHRLIQILGGDNGNFAAAIL  
IGETKAIPKTISENMRNSGVAHVLSVSLHLSVAMLFFVSCRVLNCSNYFAYNTNIKI  
IAASASIIGSFMYLQISGSNIAATRAFIMSSVFIISLMLGRSPEPLRSIMIAAFLILLFF  
PEYIFHPSFQLSFAAVLCLISGYELYIKYENVINSAKGIFFSIKFYVYGNISYSSLLASIA  
TAPFVIFHFYKFATYSVLMNLIAPLMSFFMMPLGLISMMLMPFGADEFPLKALGFFISI  
VTSSAAYITALPASVWAWGHISPMISLAVFSLCFFWVCLWKTWRLAGLAVMFLSLFMMNN

TKKPDFIYDHTLKAIGLNSQRLGSPKLGSPRLEFQIYVHDKMPKFTSNYWVSWYGAKES  
ITRKKIAAKDLIFKLP SGKTVSLNYWRCTYADIQIITSKCLKCDNNGGQVISNKELWKHKQ  
ILLYCDEKECRVQYREQNRWW

>gene\_335|GeneMark.hmm|98\_aa|+|5391|5687 >NVVL01000006.1 Rickettsiales  
bacterium isolate NORP64 Contig\_source1382A\_1705, whole genome shotgun sequence  
MSKLPEPESESIEEFARLLSKQEGHSILKHTKLAAPILTVSSVETPPVETPPVDILNYTA  
LFDTYAFNVIPKDKTPHHISAIGHAEVPTGDPTEAE

>gene\_336|GeneMark.hmm|497\_aa|-|5872|7365 >NVVL01000006.1 Rickettsiales  
bacterium isolate NORP64 Contig\_source1382A\_1705, whole genome shotgun sequence  
MTDSELPPFKSLRNIFWPIHKKELAKFIPMSALMFCVLFNQNVLRLKDSILISEVSAE  
ITSFAKVYCVTPMAAIFVVIYMKLINHLPFSKIFYLLISVFTAFFILFAMILYPNVDFFH  
MDGEKLSLYMQAYPHFKWYIALIGNWSYVLFYAFSELWPNVYVLLFWQIANDITSTSEA  
KRFYLLFALFGNSALVVVGLMMMHLSSDNSIIHTLFTVSNKTMITKVSIAMVAVSSVCA  
CLLVRYISNVIMKDPALYTEAERSTKPKLGIIDSFYIARSKYLWMLICTASFGLSMNL  
IEAVWKAKIKELYPTVNSYMAFNMYILWTGVTIMIMTIIGNNIMRNSSWFVAAVITPLI  
VLITGTVFLLVFDNNVMSFFEGAILMSPLALAVFVGTQNVLSKGSKYSIWDTSRQML  
YIPLDQELKTKGKAADVVISPKIGKAANGLIQSMIFTILPMATYTSIAPTLMVIFIVVCV  
MWIYAIRKIYFEYQKIV

>gene\_337|GeneMark.hmm|395\_aa|+|7726|8913 >NVVL01000006.1 Rickettsiales  
bacterium isolate NORP64 Contig\_source1382A\_1705, whole genome shotgun sequence  
MFDFAQEEQCKRYKSEYKFKIKSREVESYKKSIDIGYKSQIASLVYCGGAYKNTHATSSQ  
GQDVPKDNPAKDIITKENSPTGNPSIDNLAPANLARNNSAKGESVFLIPISIFNSPEILF  
LGDKNSFTKNLSTKNNLYLASWSQQTAIQLTMENYVNEVQKMISFLHSLGHKKINLIGHC  
IGGNMCLAASSLQGINQSAEQSANQDAGQIESLTLTCPWDYSHFKKWVYLYDIMGFDTH  
LKGINFIPKIYIQMMFFLMFPFQFKEKLEKYFALEQAHEKQSFLQIEAWLQSGNIISKSI  
YAEIMQDFCRKNILQNNNEWLIGGELITPEKLDIPTCIIYAKDDQIAPHSSIAPLQKRIKS  
STLIETEGGHIGYLVKGCAYLQTKYNEWIVENNLR

>gene\_338|GeneMark.hmm|391\_aa|+|8919|10094 >NVVL01000006.1 Rickettsiales  
bacterium isolate NORP64 Contig\_source1382A\_1705, whole genome shotgun sequence  
MQEAYIVSAKRTAIGGFLGSISSVPAPVLGAEIINAILRASKIDPSIIDDEVILGQVITGG  
SGQNPARQSVIKAGLPIEIPAMTINKVCGSGLKAVALAASAIRAGDGEVFIAGGQENMSL  
GMHGSYMRGGNKFGDTKLTDFMMYDGLTDAFSKEMMGITAENIATKFTISRKCQDELALS  
SQSKALAAQKDQKQDEIVPIEVKHKRKTIVFAEDEGIRPETTLEKLSKLPKAFKEDGTV  
TAGNSSTINDGAACLLVSEAAALKKYNLTPLARIVSYAQCGVDPALMGTGPVPASKKALS  
AAGWNPLDLLEANEFAVQAQAEVNRQMGWDVAKLVNNGGAIALGHPIGASGARILVTL  
LHEMKRSGAKKALASLCIGGGMGIAMCLEGM

>gene\_339|GeneMark.hmm|94\_aa|+|10429|10713 >NVVL01000006.1 Rickettsiales  
bacterium isolate NORP64 Contig\_source1382A\_1705, whole genome shotgun sequence  
MSQFVKNILTKEPGSLLTQIVDMLSSVDDISIEISDSGVASISKEKSKFVIIKETIKLA  
DKGGVFTPLKESIKTQDDFLKAATEAYWIVAKKK

>gene\_340|GeneMark.hmm|195\_aa|-|10824|11411 >NVVL01000006.1 Rickettsiales bacterium isolate NORP64 Contig\_source1382A\_1705, whole genome shotgun sequence  
MAKIIFLNGASSSGKTTIARLLQEKLSEPYMHIGIDSLIDMMPDKINNWVDANPDSVQGF  
YWQKSLDKNGHNLAHITSGSYAKKVNSTFQDIVVLFANNGHNIIVDDVCIPPKHYDLWKQ  
KLYEFQVYYIMVNAEISDLETREKSRGDRITIGSARAQNMLVHKDKIYDLKINTSKNTLEE  
CAQKIADFIRSYEVT

>gene\_341|GeneMark.hmm|139\_aa|-|11421|11840 >NVVL01000006.1 Rickettsiales bacterium isolate NORP64 Contig\_source1382A\_1705, whole genome shotgun sequence  
MAKDVVGDKFDLFLYAVGKGDIVTFTDKTNAEIIISALVVAAQNNRAEMVRLKLNLA  
LKNLDQDLSSISDITPEVWKQIQDFANDKDWEIVVSEHASHLAGRPVLGSTYWGESS  
WWGIVIECFSSIFPDENSP

>gene\_342|GeneMark.hmm|232\_aa|-|11904|12602 >NVVL01000006.1 Rickettsiales bacterium isolate NORP64 Contig\_source1382A\_1705, whole genome shotgun sequence  
MSDESMLALSILKGVSKTYMQGGSLIDVLKNVDLEVRTGQMVAIIGASGSGKSTLLHIAGL  
LDSADKGSVSIQAEQIKNLRNANRVRLNNMGFIYQYHLLRDFTAQENAAMPLFISGVNK  
QEAMERAGSILSDGLAERLGNMPGELSGGEQQRVAVARALINNPKIILADEPTGNLDKS  
TAEVVFAMFLERAEEKFGSAVVMVSHNLELASRMHKIYRLECGLLEEEECARNK

>gene\_343|GeneMark.hmm|414\_aa|-|12595|13839 >NVVL01000006.1 Rickettsiales bacterium isolate NORP64 Contig\_source1382A\_1705, whole genome shotgun sequence  
MLSNFISILSLRYFSAKKNEKFISIISLAGIAIGVAALIIVMSVMNGFHIELTGNII  
GLNGDIKITPVGKTIEHHEIHKLSAKSFVTKVTPVQVQALVLGKTANSGVLKIDIL  
VDLKDKGSLGNVHSGSFEDYYGDNAAVAVGSLAGTIGVYARSKIKMISPVILPTLFGSM  
PRAKDFKVVSVFSTDLYDYDSATMLMPISAAQKFLGLGEGINLLEINVDDSEKAKAYARE  
LQKELGANIYVTSWLEEQYFLDALEVERSVFMILSLIMIVA AFNIISL FMIVKDKTK  
DIAILRTIGASTKQIMCIFIINGMMTGFIGTALGVISGLLFSYNIENIRKLLESISGSRL  
FDPAIYFLYTLPSVVRFGDVVAVASLALGISFLATIYPAYKAAILNPVEAMRYE

>gene\_344|GeneMark.hmm|433\_aa|-|13829|15130 >NVVL01000006.1 Rickettsiales bacterium isolate NORP64 Contig\_source1382A\_1705, whole genome shotgun sequence  
MLLSQYFLPVLKEQPSEAQVASHSLMLKAGMIRQSSSGIYSWLPLGLKVLRNIEIIRFN  
MDASGFVEILMPCVQDGLWRESGRLDVYGEEMLRFKDRHGHDLFGPTNEEVITDIIRN  
SIQSYRDLPKVLYQIQWKFRDEIRPRFGVMRGREFLMKDAYSIDLDEESAITYDQIFAA  
YMRTFKDLGLNVIPLAADSGEIGGSMSEHFVVAETGESKIYYDKKFDIIGEDLMGDMNQ  
RKSLYAATEEKHDPKTCPIPESELSVKRGIEVGHIFNFADKYSKPMKAMVNDNNGKQIPV  
HMGAYGIGVSRVLAIIESSHDDKGIWPIVAPFKVSVINVNIKDELSCSLAGNIYNML  
RSKGIDVLYDDTNARTGAKFATHDLIGSPWQIIVGPKKAASGLVELKHRASGEVDEVSPD  
EAILMVVNSLNVK

>gene\_345|GeneMark.hmm|189\_aa|-|15237|15806 >NVVL01000006.1 Rickettsiales bacterium isolate NORP64 Contig\_source1382A\_1705, whole genome shotgun sequence  
VTKPTKDQAEQAVKLLLEYIGEDVNREGLKETPARVVRSYAELFAGYALPIEDVLSKTFT  
DVSEYNDVLLKKIKFTSLCEHHMLPFYGTVDIAYIPGGEVLGISKLARLVDMFSKRLQI  
QERMTEFIANSLSHLNPGGVAVRVSAVHSCMSARGVAKNGAVMDTTYFTGEYHEHAEKR  
KEFLDSIRG

>gene\_346|GeneMark.hmm|462\_aa|-|15825|17213 >NVVL01000006.1 Rickettsiales bacterium isolate NORP64 Contig\_source1382A\_1705, whole genome shotgun sequence  
MKNNNTNLHAILWLKTGITALAIAGLYSIILVLLRTPGLNQLFTDKSIFKSALVIHVNSLV  
LVWLLAITCIIWSISKVRSGFESLFTYIAIAGMALMALSPLYPESVPIMNNYVPMLENIF  
FAIGLGLFGTAILCFAIQTILTSFMGDAFSDYGERIIAITKITSAMMYVAVWICFILSFI  
GVSALSEIVPLDIEFFYEMLFWSGGHLLQFIYTQILMIVLLILAEGWRGGRIGSHA EYEL  
ILVLNFVLSLAVFLGHAYYDIADGLFKEFFTRHMIYSGGVAPVIFIAMLIAEIVQKRTPN  
VPTFIPAAFVSSVLLFLS GGAIGAVISGVNVTIPAHYHGSIVGISVAFMGLSYMLCFQKN  
VAGSLTEKGGVISFIIPNSRSDNTKSQRSASWQIYTVTIGQILHIGGLALAGGYGVMRKT  
PGEEIALSAKVYMGMVGAGLLAIIGGLMFVYICARKLFYRE

>gene\_347|GeneMark.hmm|314\_aa|-|17451|18395 >NVVL01000006.1 Rickettsiales bacterium isolate NORP64 Contig\_source1382A\_1705, whole genome shotgun sequence  
MFEKPLISFDFAIKFLLKSKEDYEIIEGFLSALFVANNYKPVKITALLESESNKEAAHLK  
KSVADLIVEDTDGNKFIVEIERSFTPNFTHKACFNTARLISDSISTSQDYSKIQKIFHIS  
LLYFETAGMEKPIYHGKTIIEVDTEHPIDIDIMNKGIATFENKNIFPEYFFISIPRFND  
QIRSEMDEWLYMMKNSEVKADFKSPYMARVAKRLKVL RMTDEERIEYHKYLKESAVQEDI  
LNAANSKGLAEG LQK GMSQGLEKGRKEGREGREEGAKLT KIEVAKTMLVKGLDINLISQ  
ISELSIDEIMELKN

>gene\_348|GeneMark.hmm|213\_aa|-|18477|19118 >NVVL01000006.1 Rickettsiales bacterium isolate NORP64 Contig\_source1382A\_1705, whole genome shotgun sequence  
MPYAFRYRVVEAFVASFLYLIETICGIKYRVEGLEKLPADGKPYLLLSNHQSFWENCIFL  
MLLPKHSWVIKRELLNMP CVGNGIRSVNPIAIDRSSNR SVMYILNEGAKKFKQGISLVIF  
PESTRVSVHKNARFKASAARLALNTKVPVVLVALNSGLVWP KGIWLKRP GTITIKIIESM  
SPEQVAKYDTR ELTDYIQQKITTEKNALVKAGV

>gene\_349|GeneMark.hmm|310\_aa|-|19351|20283 >NVVL01000006.1 Rickettsiales bacterium isolate NORP64 Contig\_source1382A\_1705, whole genome shotgun sequence  
MHKNFPQYASEAGMLSI AKLASKHGIIPKKKYGQNFIFDETLCDRIVRAAEIGNDSVVLE  
VGPGTGGLTRSILKTS PAALYAIETDSRCLPLLEEIKLSYP ALEV LNQDALKVKLEDVIS  
AVSAGGEEGSEAETSSKSKPSLEIATDKLDIVANLPY NVGSQ LLDVWLCQIEHVASMTLM  
LQKEVVDRITSESSKRSYGRLSIICQLVCDVHKCFDVSPKAFVPQPKIWSSIVRLVPK KD  
RPTKEILLIETITRHAFSGRRKMIKSSLKNLSPQIGDILDDLGIANTLRAENLSPEDYL  
RIACHEGCRY

>gene\_350|GeneMark.hmm|300\_aa|-|20309|21211 >NVVL01000006.1 Rickettsiales bacterium isolate NORP64 Contig\_source1382A\_1705, whole genome shotgun sequence  
MRKLLSLFIVLLSSSIFTSSAYAGYPDIVALVNDQPITKYDFQSRRKMAIALNNIDVSDP  
AVSRKLSRDILNILIDEALLDQHMEKVS GKVTEQEVD DSITVIEQRNKMPKNG LKMFLKS  
KGVEMSSFRKQVKGELIKRNIVQALSGGVS VSPMELDVALIHSGNQVFDVEAWVFTSKNH  
DEKAQKQMHGLQKRFKGC DKVEDAMYAEFADA EKFDRLHDL PVKTQAVVFDTKASSFSN  
LYSEGDKFKTVFVCRKESAVSSADLNKIKSFLSNKKMSQKAAKFFKDLRAKAYIKNMISG

>gene\_351|GeneMark.hmm|695\_aa|-|21232|23319 >NVVL01000006.1 Rickettsiales bacterium isolate NORP64 Contig\_source1382A\_1705, whole genome shotgun sequence

MFSGLSFDKQPISKNVSMKADSVFYDASTDIITAKGNIFVSMGGYSLYADQMNYDSKRDV  
IFAEGNVRVVDIDGKVIYGEHVVLKDKLKRGVIKDFIAKLEKNSVITANSAIRLSKNKYV  
MKGSVFTSCKMTCNRKPIWQLNAAHVGVLDLKHEDYKHFVFEVYGIPIYFPYFQHSTP  
NAPAKSGLLTPKIKHGDFMLPFYFRVKPNLDLTLSPRTSGKYTIFETELRHVKYGGYEV  
LGSYGNVEFKTTATNITKTTKTGRYHLFATGSFVNNDIHYGFDIKRASDKAYLTNYHKI  
YDSYLTSKIYANKVNERNYFSLEGGYFQSLKSETSNLSTPLVLPVSVRTQNVYAIDEEESL  
LLNVRSDNIAHRGSKGSQLARSSLDLELMKNIISDGGHMFSLANRADLYWVSFVDNKA  
KKAKKEKEEILYRTIPEFRTKWRYP LARSFAAGFNVKIEPTAMVVFGRRYKSEFEKFAQI  
DSPKNELSENNIFNANRYSGVDFHDYGRFSYGANLSLASESIYVDAFLGQLLQKNNIKN  
ENNSEYVGSIAIDIEDDFELFYRFRKDKKLSPILEVGASIALERFTSKAVYTKLQNISR  
YFAKDGFEFERNKASQVSFDMYDNLVNNLWVGFSSKLDVSSKSIKMLTRSIRVTYSFDCV  
SINAVITNNSLLDASRGVKKTNDISFQVGLGINM

>gene\_352|GeneMark.hmm|445\_aa|+|23447|24784 >NVVL01000006.1 Rickettsiales  
bacterium isolate NORP64 Contig\_source1382A\_1705, whole genome shotgun sequence  
MLEDSTNDISQSEFSVSEISSKIKSLLSENLTGTVRIKGEISGLKIAASGHGYFSLKDTN  
AVLAAICWRHALARMNFKLEEGLEVIVTGKITAYAGQSKYQJSAEKIEPAGIGAFIKILK  
ERRLKLQKEGLFAKELKQKLPFLPKKIGVITSIGAVIKDIIHRISDRCGTNIWVAV  
QGSASASEVTKAIDGFNKMAQKPDLLIARGGGSIEDLWSFNEEIVIRAAHASKIPIISA  
IGHETDYTLDLAADMRAPTPTAAAEFAVPVLLDLRYTLKSLYGRISNRFMELVRYYSQA  
LGNHTRALGRVSSDINNHTQRIDDLFRLIASLPNLLKQKQNALQYFPLSRLKPLKILKY  
KYLQYKNCADNLLRKEDSLLSEPEHRLKISLSLLASLDYNNVLKRGYAMIKNKDGTIIS  
INEVKKSDNLKLMQDGEIAVTCNN

>gene\_353|GeneMark.hmm|35\_aa|-|24841|24948 >NVVL01000006.1 Rickettsiales  
bacterium isolate NORP64 Contig\_source1382A\_1705, whole genome shotgun sequence  
MSGEYLEHEFLEARSAGLEYLVFLEIFLSRFKFLD

>gene\_354|GeneMark.hmm|601\_aa|-|25057|26862 >NVVL01000006.1 Rickettsiales  
bacterium isolate NORP64 Contig\_source1382A\_1705, whole genome shotgun sequence  
MKKFFLTLLMAAPIAYGEGVVLSYEGNNQFEVSNQNGLITGIAEAKLLFPAGSQLKFTH  
EEDYLRDVIAASSYDLSNPSSMLVQKLNLEIQSIIDSWKSAKFTEEQREKILKTSYNAT  
QKCLKEDKVINLANLDHKVYWTCLIEITKELFKKDPKTEDANALLAKNAEKLLARVQIDL  
LRLEIKGQEIQNIITKAEDGYFDPATFQQALDNVHAGSAVIEQRLNSYRQKQSTQETFV  
EKLKDLADEKDPHKKQAYLDNINANIDLYVNPDIKAGDNPDELPAIQPEETADAMTKMM  
ATTFETVNQVAGLVSSRVMNKSGLIASGNAFESYGLWLKGLYSRGEQKAYKGKNGYKFNQK  
SVIIGADIGDESLVGFAYSFSKSDVKNQASSKNKDDISTHMGTIYGKYALTNQVFISGQV  
QLGTSTIKIKRDTGINTISTAKPKASIVSGRTEFGYSFAASQNLLFIPTIGVAYSSIKVD  
GYQEKGGTNRSINKMTTKRTSALAGVTAQYVHDTGSVTLPELHFNVEYAFNAKNSDTV  
KFGSLSPITTPSEKPTKVRYNFGTSIRIINLGAFEFSVGYDLGAAKKFVSHTGTIKLRVN  
M

>gene\_355|GeneMark.hmm|142\_aa|-|27045|27473 >NVVL01000006.1 Rickettsiales  
bacterium isolate NORP64 Contig\_source1382A\_1705, whole genome shotgun sequence  
LIGILSILSFLFGVYIISNLTDNIVFFHPPSEISKIQPGATKARVGGIVRAGSILRIS  
AKKISFIITDHIADLRIEYEGVLPALFREGQGIVAEGMLAPKPSPGSALELAPDTIFIAS  
KLLAKHDENYTPPEIKRISRQE

>gene\_356|GeneMark.hmm|51\_aa|-|27475|27630 >NVVL01000006.1 Rickettsiales  
bacterium isolate NORP64 Contig\_source1382A\_1705, whole genome shotgun sequence  
MITYLISAYSFTFAILGYCLAKTILDHRATNANAANEVTSKRVRGEDKKKK

>gene\_357|GeneMark.hmm|92\_aa|-|27979|28257 >NVVL01000006.1 Rickettsiales  
bacterium isolate NORP64 Contig\_source1382A\_1705, whole genome shotgun sequence  
MNKGEFVSFMAAKHGCTKADAESIDMFTSSVIGALGEGGEVSLVGFGNFSVDVAARAG  
RNPRTGDPIQISAYKQPKFKVGQKLKDACNNR

>gene\_358|GeneMark.hmm|148\_aa|-|28392|28838 >NVVL01000006.1 Rickettsiales  
bacterium isolate NORP64 Contig\_source1382A\_1705, whole genome shotgun sequence  
MNSFQETRLVPYKADLIHEIIMGIEQYPEFLPWCDKASILERHDEFITAELGVNFKGFSE  
GYVSEVRSSKTDGYYVSVRAISGIFKHLENKWSIKNVNNGSEVSFSIDFEFKSKILDGV  
MGMIFSLAIEKIIVSFESRAEELSRKLV

>gene\_359|GeneMark.hmm|299\_aa|-|28860|29759 >NVVL01000006.1 Rickettsiales  
bacterium isolate NORP64 Contig\_source1382A\_1705, whole genome shotgun sequence  
MTEETTLKRPDWIRVKAPNSKEYQETKKLIKDLKLVCEEAACPNIGECWSKKHATVMI  
LGSVCTRACAFNCVKTGRPDLLDPHEPERLAIIVGKMGLEHVVTSDRDDLDPDGGAAHF  
AECIKEIRKTAPNTTIEILTPDFLKKDGALEVVAAKPDVFNHNIETVPSLYKTIRPSAR  
YFHSKILNDVKKLDPEIFTKSGIMLGLGETTEEVQLVIDDLRAADVDFMTIGQYLQPTK  
KHAKLDRYVTPPEFTYLGRLAKTKGFLMVSSSPLTRSSYHAGDDFKMRLARQKQLELI

>gene\_360|GeneMark.hmm|360\_aa|-|29756|30838 >NVVL01000006.1 Rickettsiales  
bacterium isolate NORP64 Contig\_source1382A\_1705, whole genome shotgun sequence  
MKKVYLESVELGNYNFADLSLDFFAQGMNIIKGPNGCGKTNILESVSFLSPGKGLKSANF  
DDICKFTHNSWSSNFHLQSKMGRAEISTSFSENERSRKINYNGSKLSGSELTNLLNVIWL  
TPQMEGLFLLGGASARRRFLDRIVNFDKAKHAKNLKAYEHFMRQRNQLLQGDIEQASWL  
TKLEEHMAIEASIDASRREVAFLMQESIDKLETEFPKAQLEVMKLVENQQDTEGFLEY  
TGALAASRKKDSYSGRTSFGVHKS DLLVFHKAHNAPAALCSTGEQKALLISIMLASIAAL  
LENSNTTPILLDELFIHLDEERKKHLSEYITSSKLQTFITTTDIVGIEDLAKNAHIIDL

>gene\_361|GeneMark.hmm|309\_aa|-|30869|31798 >NVVL01000006.1 Rickettsiales  
bacterium isolate NORP64 Contig\_source1382A\_1705, whole genome shotgun sequence  
MPKPSEKFMKPSDNEAPSGEEDPSRAIARSLKSTFKSFYEKVKSKIKLKSQATHIAKNS  
LATTTGKHIATTLSEGQIAGNIKGFTEKVVEDILIPRSDIISASTDVTLQELSKIVIEHT  
HTRTLIYEKELDNIVGFVHIKDLFEVIANSREFNLKSLTRKHIIAPCSLQLADLLAQMQK  
KRTHIAVVVDEYGGTDGIVTIEDLIEELVGEIDDEHDTDHNENSFELIKPGLLVTSARAE  
VSELERFLGVKFKKSDDEFITIGLLMAKSGHVPKGVVMNITDNIIAEVLERTPRTIKK  
IKITYDKDQ

>gene\_362|GeneMark.hmm|171\_aa|-|31815|32330 >NVVL01000006.1 Rickettsiales  
bacterium isolate NORP64 Contig\_source1382A\_1705, whole genome shotgun sequence  
MKINVEIARESQQDREQRSFLNEEFIAEITERVLSRYPAFAQSGEFELSILLTDNSKMKSL  
NKEFREKDKATNVLSFPDEDLDWRNIDKINKADKTHLDSSEVFLGDVAFGYQIIEEEAQE  
KSISFQDHFTLLIHAHLHIGYDHIEDEDAKAMETLETELLQSLNIASPY

>gene\_363|GeneMark.hmm|341\_aa|-|32395|33420 >NVVL01000006.1 Rickettsiales bacterium isolate NORP64 Contig\_source1382A\_1705, whole genome shotgun sequence  
MQAVAYNPGQLNCYCCFMKKFIFSAIIFLVLLLTWIGALYFVLLKTDIATVPVNTTTE  
LSQGEYKPLTALVSYGAGRPVFLSNQFTLAESAINKGIEHIYLYGRHNIDEEFYKHK  
KTLEQPRGAGYWLWKPFIWKTMEQLPEDSVIYADSGIVFSKPPAETLIPFLDKEYDII  
FSSHGHIPLGIFMKKEAQIILGIDKNEKILNSPEIWADFMIIKNNASSKKFIKKWLKLC  
ENPDLLTDSFPDPLDQDKNLRHLHDQALLTFLVATNPQRKMVIKNLRERSGFGIHNHFR  
HPEDKYTSPKFHAGIKKKIANLLYNNSILQKIREMQDTIQ

>gene\_364|GeneMark.hmm|539\_aa|+|33612|35231 >NVVL01000006.1 Rickettsiales bacterium isolate NORP64 Contig\_source1382A\_1705, whole genome shotgun sequence  
MTATLEEIAKSDKIKELYDEMPYASCPFDYNKPEHLCTIATLFGMSPPALENARILELGC  
SDGGNSFRFAEIYPNSYTLGVDLSEVEIKNGQDILSQLKLNKMEKAMSITDLDESYGKF  
DYIICHGVFSWVPDFVRDSILEVSKLLTENGLAFVSYNTLPGWNMVNTVRELMLYHSAG  
FDNIQDKILQSRAALNFLQSSLDGQDTPHAKFMGEMAKHMSEQKDYYLRHEYLGDENKAF  
YFHDVIDMVRAHGLEYLGDADIQKMYTGTLPEVAEKLSAGDVVKVGGYIDFIQNTQFR  
STILCHQGASIMRDISADLLKLYFYCTITSKPTEEGLAPNIVDDSHVNFYLDNVESNTL  
GTASPAIKAVFTTFAQNRGNALSFDDELGGANALVPEVSLELIQAEILNFMHLIFSGHI  
KIISNKPANIYEISDKPKISALSRFQIDRSTGQVYVITNALNAIVAFKIQHIKLIKSLD  
GKTIKQLQKQTLSEFKKEIVASENNEKIEDEARLKPIADNLVNNTLGALRQNFCLIA

>gene\_365|GeneMark.hmm|173\_aa|+|35312|35833 >NVVL01000006.1 Rickettsiales bacterium isolate NORP64 Contig\_source1382A\_1705, whole genome shotgun sequence  
MFIDKIPAKTKNGDFNVIIEIPMNDNPVKYEFDKESGAIMVDRFMQVAMSYPCNYGFIPH  
TLSDDGDPADVLVMSQHPHIIAGAVVKVRPVGVLMMMEDESGMDEKILAVPISKLDVTFDSV  
KDIGDVSDMLKQRIHHFFEHYKLEKNKWKVIVGWENAEKSLQIIEEAITRAG

>gene\_366|GeneMark.hmm|52\_aa|-|35914|36072 >NVVL01000006.1 Rickettsiales bacterium isolate NORP64 Contig\_source1382A\_1705, whole genome shotgun sequence  
LLNKELSEIYICSGVVGLEALRVALEFLLPGLEYSFLIFFHLLFFNSKILI

>gene\_367|GeneMark.hmm|204\_aa|+|36288|36902 >NVVL01000006.1 Rickettsiales bacterium isolate NORP64 Contig\_source1382A\_1705, whole genome shotgun sequence  
MPEKKDTTQDDINPHLRSRFELEMSSILEDSSDQDLKSMERIFQCSNTPDELESKLT  
LLSKYAENLVSQKEMQATHEIQDVVQREITKFCNLTCLGKGETHSSRDSLDKRCILTI  
ESRKNLQREIQNFTIYLLYKVLNPKRISGETAKGNYINLIARGKNVAGKYTGQEKDLK  
KYTDREINAMQKQAALARKGSFSR

>gene\_368|GeneMark.hmm|640\_aa|-|36924|38846 >NVVL01000006.1 Rickettsiales bacterium isolate NORP64 Contig\_source1382A\_1705, whole genome shotgun sequence  
MICLNCNLSFAKENSXKLFKLMKQHKWEKSYKLASKIGDPALGKIVLSQQYLDNKYKKN  
SFEDIAKFLRANPRWPQNYLLRLRLEGRIEENTDKKLLANWFKRNRPLTGRGYKYHALTA  
SFYEKNPDKLSTIINKGWRYGSFKAEGQREYKFKKHLTENDHVRKIDNDLWEGNVSAA  
KRSLHLVSPGYKKSFNAQJAFVQKKAERFFRRVSAKYTPGLVYRYLSSKTKPPSAS  
KIDKLIKMVKSDKRYAGRFWALQSYLARESLEKKRYRDAYKIASGHFTVNAGNRSDAEFL  
SGWIALSFLKNSKLALKHFRNFNRVVKTPISKSRGIYWLGRAHEKGRDIEKAQRLYNLAA

DKYPYTFYGQIAMVELKRAKMHLPPAINLEKYKKSSLAYLKNHEIARATQIVTMYGSNSL  
SEKYIDAAVSGCKNTAEVMNMVMTALKKAKNIHYMVWAAKAAVRKHVFIKNHAYTPYKVS  
KFPLETPLYSIIRQESVFDKRAISSAKAMGLMQLIEPTACMTARSIKIRCRISKLTDDI  
NYNMRLGNSYLGQLVKQYSGSYVLAMAAYNAGPPKLNKRLKIYGDPRKMKTLRQVVDWLE  
LFPFPETRYMQRSLEHLQIYRNIINKDNDFRLERDLLVK

>gene\_369|GeneMark.hmm|315\_aa|+|38921|39868 >NVVL01000006.1 Rickettsiales  
bacterium isolate NORP64 Contig\_source1382A\_1705, whole genome shotgun sequence  
MNRAFIFPGQGSQSISMGKDFYDSEQSAKQAFQSVDDVLGYSLTDIIFNGTSAELAITTN  
TQPALMVTSMAILRVLEEKSGKKIDQLCKLVAGHSLGEYSALCASGALSLEDTAKLLQIR  
ASSMQKASPKGEGGMAACIGIGRAALQDMMGSLISEGVCQIANDNVEGQIVISGHEENID  
HMIACLKDTGYRAIKLNVSAFHC SLIKNAEPMRAALDNATFNALQVPIISNVSAELVD  
DTDVIKQNLVTQICGTVRWRETMDKMAAMGISELVEIGSGRVLAGLAKKSPHEFTVHNIA  
SMEDLSKFLRSYEVS

>gene\_370|GeneMark.hmm|491\_aa|+|40495|41970 >NVVL01000006.1 Rickettsiales  
bacterium isolate NORP64 Contig\_source1382A\_1705, whole genome shotgun sequence  
MGLDIKAPENVILKPIITVFGVGGAGGNAVNNMIKSLKGANFVVANTDAQALTHSEALN  
KIQLGATSTKGLGAGASPEVGKKAALAESESEIRSYLEGSNMLFITAGMGGGTGTGASPMI  
AKIARELGILTVGVVTKPFLFEGSRRMRVAEKGLADLQKEVDLIVIPNQNLFRIANENT  
TFQEAFADEVLHAGVVRGVTDLITSPGLVNLDFADIETVMGEKGMAMGTGEASGEERA  
IKAAEQAIANPLLDQNSMCGASGLVINITGGKDMTLYEVDSANRIRREEIGDIDANIIFG  
STFNPELDGIIRVSVVATGIEGTGLTHKNREEEALEIAKNQQVTRQTQEDQAEGNLSGR  
NLAEGNPASEEFASGGVASVSDVQPPSYNEYDDKISEGEAELQKKLEQLARQMDWNKH  
QQISENPQSSAPSPAPLPRKPSLLRRMWNSLKAADSEAVPHAHTPNSEQAAMQNQADKTP  
EIQEIPRFRKE

>gene\_371|GeneMark.hmm|307\_aa|+|41998|42921 >NVVL01000006.1 Rickettsiales  
bacterium isolate NORP64 Contig\_source1382A\_1705, whole genome shotgun sequence  
MKINSQKSSKQTHKYIKHIELAPYNPDWPKLYESEAAARIKQALGDNYIAIHHVGGSTSVPS  
LIAKPKIDIIAVVVDLQRSIKTLEQIGAEYRGEYNIPGRYFFRKRGGIDVNLHGDIDVNL  
HIYEKDHPEIELNLMFRDYLRTHPAARDQYALLKQKLLQDKSSFENHRTFTEYTMRKGD  
FIREILKDAGFSSVRIIRCSDQTEWSAAKLRKQYFTNIKSNDPNDLESCYLNAQNAPSA  
PAARRAFMDEDEHLALYKGPEIIGYSHIHLPGNNKPVIRILIIDENHHGQGFEFKFLTLI  
REFIIAS

>gene\_372|GeneMark.hmm|522\_aa|+|43139|44707 >NVVL01000006.1 Rickettsiales  
bacterium isolate NORP64 Contig\_source1382A\_1705, whole genome shotgun sequence  
MTDISGSKQTSSKSSEIPLSPLSKYAKFLDYIWPieraELPKFLSITLLMFCILSIQNLI  
RAMKDSVINTMIGVETSSFLKFWGVMPPAAILITIIYVKLVSVMRGENIFYLMMSSFLGFF  
LLFAFYLFNHEMIIHLNPETTQALIASYPNFKWFILLSNWSFSFLFYVIAELWPSAVFAL  
LFWQFVNKVTTVEESKRFYPIFGLLGQTGLYLCGTFLANLLVINTYFTDLFTLEESQSVV  
SIKIVMILVGILGVALATFWVLNKHILDISTTENLQFRVKKNQITLKEKSLKIIVQSRYI  
RLIATLLVCYGIAINLVEGPWKAGALKVYTTPEWAAFTGNYLKYTGVLTVLFTIIGSNL  
VRRLGWFSAIITPIMVLVTGLAFFCIANFKFSETLIIMYFSFSDPVMMLAIVIGAMQNVL  
SKSSKYTLFDSTKEMSYPVPLDDQLKTRGKAAADMIGTKLGKSASALLTSLIFVIIPTATY  
ASISTFLMWIFIGICGVWIWAVIELNKEYKIACKNKGDETIY



>gene\_373|GeneMark.hmm|195\_aa|+|44859|45446 >NVVL01000006.1 Rickettsiales bacterium isolate NORP64 Contig\_source1382A\_1705, whole genome shotgun sequence  
MRARMALHYSIDIAYDLREVDLKNKPQAMLDISP KGTVPVLQLTSGEIIIESLEIMHYAIA  
QNDPESICAVSKETDLEIQVLIQKNDIEFAKLLRKYKFEKHKEETQESYRKQIEDLFLI  
KYENMLEGNDFLFGKSLADIATLPFIRQFALVDEDWFFESRYKNLIRWLNSFICNENFK  
SVIMAKHPTWKESSC

>gene\_374|GeneMark.hmm|187\_aa|-|45694|46257 >NVVL01000006.1 Rickettsiales bacterium isolate NORP64 Contig\_source1382A\_1705, whole genome shotgun sequence  
MLLIVGLGNLGTKYQNTRHNVGFMAVDLISDRYNLDWSTKSKFDADIASGECELGKIILC  
KPNTYMNLSGISVQKIKSFYNIPISDIIVIHDDIDVLEKTKYKLGAGGAGGHNGLKSIDS  
AIGKDYHRIRVIGRPNPNHDVSDYVLGKFGAREEISIMQQLTKLEESIKLLADKDTDK  
FKAASK

>gene\_375|GeneMark.hmm|216\_aa|-|46259|46909 >NVVL01000006.1 Rickettsiales bacterium isolate NORP64 Contig\_source1382A\_1705, whole genome shotgun sequence  
MSEILALTAEARKELGKGASRALRKRGMVPITYGAGKKPVSLSVQEKELTKYYRKPQYI  
SQLIEFRIGKEYTVLPKAIELHPTTEMVRHADVFLEKEMQKMQVPVVYTNKDVCVGIK  
RGGYFNTARRLITLCPIANLPRSIEIDTSELEISASIQAKDAPLPKGAKLLGDPNFVIA  
SIIGKRGKSDDLGDDDGAPAEGGGDAAKAEDSKEAK

>gene\_376|GeneMark.hmm|310\_aa|+|47190|48122 >NVVL01000006.1 Rickettsiales bacterium isolate NORP64 Contig\_source1382A\_1705, whole genome shotgun sequence  
MAIFSLVFFKVLSSLLSVLMGFLSGKYSDVQKESIASLLFFFVAPIVFFAIPITSANLTIE  
SLGITLLTFLSCTMLGFFSYWLYGKVVQDSHRNIALSAGTGNGGYVVLPIATALFDDHT  
LSIFALGLIGISYIYASIGCYFCARSMGTFRQSVLRVARLPLLN AFFLGCLMSLSGFHLP  
DFFDEFVNNMKGAFSILGMVVIGLALSNIKFKFDMKFTSAAFASKFLFYPILFNAFILL  
DKYVLGWYDVNDYNALQLLICIAPMATNTIVLASLYKIHPEKVATAVLLSLLFVLLYMPVM  
ATLFIIEGVVV

>gene\_377|GeneMark.hmm|319\_aa|+|48137|49096 >NVVL01000006.1 Rickettsiales bacterium isolate NORP64 Contig\_source1382A\_1705, whole genome shotgun sequence  
VYKDMTKSTTIKTKFLVIGSGPAGLTAIIYAARAAMEPTLIHGMQPGGQMTITTDVENYP  
GFAETIQGPWLMQEMEKQAEKVGTKLVHDYVERVDLSSRPFKAYTSSGDVYEAESMVVST  
GAQAKWLGLPSETKFQGFVSGCATCDGFFFKGKEVVVIGGGNTAVEEALYLTNHASKVH  
LVHRRDSLKAERILQDRLLKHEKISMIWDSTLEEVVGTEDPKSVTGVRLKNIKTGDVTEL  
PCEGVFIAIGHKPNTDLFKDQLDMDKEGYLITQPGSTATNIQGVYAAGDVQDKIYRQAIT  
AAGTGCM AALDAAKFLDGE

>gene\_378|GeneMark.hmm|484\_aa|+|49100|50554 >NVVL01000006.1 Rickettsiales bacterium isolate NORP64 Contig\_source1382A\_1705, whole genome shotgun sequence  
MSKPEGIITEDSLRRTL PANFRAEQMLLGAVLINS DLTEQVNEFLKAEHFHEPLHQKIYK  
GIETLIEKGLSATPITVKSMLGNDPLYIEAKGDEYLIKLTTIAMVVINPRDYGKIIYELA  
IKRHIAIGEDIVNDSYNSTLEQTASEQLEQAEGKLYQLASEGMVDKGFAPLKDSVADSM  
ASINRAMKNSEHITGISTGLIDLDTMLSGFHKS D LVIIAGRPSMGKTAFAINFALNACKA  
LRRRTKEGKPPSVGFFSLEMSSEQLAARLLSMMARVDSTNLRNGMVSEEHYNDLRKASA

ELSEMPFFIDDPALSIVRAKARKLKRKNNLGIIFIDYLQLLRGTGKSDNRVLEISEI  
TQGLKAIKELDIPVIALSQLSRAVEQRPDKRPMMLSDLRESGSIEQDADVVMFLYREEYY  
LKRSEPPSSDPKYAAWQENLDKFHNIAEILIAKHRNGAVGNVRLHYLEQFSSIGNLDKAR  
MQNF

>gene\_379|GeneMark.hmm|349\_aa|+|50573|51622 >NVVL01000006.1 Rickettsiales  
bacterium isolate NORP64 Contig\_source1382A\_1705, whole genome shotgun sequence  
MITIKPIIFGVAGTSLPEEAQLFRDYPPAGFILFSRNIESKAQLTSLTRSLKNLYTERD  
IPIFIDQEGGRVARIKPPAIASKLYPTGKYFADLYDVDSQAKDAICANYAAIMSELKELG  
IDSPCAPVCDILYAGASDVIGDRCLGANADKVVLDLCKSAISGIDKSSGIPFIKHIPGHGR  
ATVDSHHDLPVVTTPLAELESTDFKVFKELSGEGVWGMTAHIIYTALDDAPATCSRIMI  
DYIRSEIGFNGVLVSDDIGMYALHGEVVGQKHSIAIKKILKELENIAETKNIEDIEDLEKIK  
VYNKLEEINPEFLESIAKVTRMSLSAGCDLILHCSGDIQEMRAVCEAL

>gene\_380|GeneMark.hmm|278\_aa|-|2|835 >NVVL01000007.1 Rickettsiales  
bacterium isolate NORP64 Contig\_source1382A\_2565, whole genome shotgun sequence  
MSEVIEEVKEAKEAAIGGDATVVEEFVSEESVLSEESIVEQENVATNALKESEESFKTP  
APPADRPKSTSKNNKKRSPHDKLFAIFGNEASARGILKKHLPEDLKKHLDLDHLKVERD  
TFVSEDLKESMSDIVYKIKTKNQKKDGDVILFLCEHQSSNDKMMFRLWKYASAWEPYL  
ARNEPLPIIAPLVLYNGKRKYSSYRRFWDLFTNSKLAEKIMAGKCQLIDLQSMPEDEILA  
DKEFGLFKFFMKNIKRDNGIELWRECFKFKFQEHKLDK

>gene\_381|GeneMark.hmm|86\_aa|-|1378|1638 >NVVL01000007.1 Rickettsiales  
bacterium isolate NORP64 Contig\_source1382A\_2565, whole genome shotgun sequence  
MDQGFVAEVSREAIYVLISMSAPILGVALAVGLMISLFQALTQIQETTTLTFVPKIIAVYF  
SMILILPYMFSLKIFVDHIMQHIVG

>gene\_382|GeneMark.hmm|249\_aa|-|1668|2417 >NVVL01000007.1 Rickettsiales  
bacterium isolate NORP64 Contig\_source1382A\_2565, whole genome shotgun sequence  
MNKFYLIFLSIFILTSCSDTIERLKRVGKAPEFENIELPTVEEDEDEIERRAERLKLQHA  
HMQKTNSLWQPSTRFFRDSRAWKVGDIIRVVVQIQDNASLNNSTNQKRTGSDTLGIPKL  
FGKEKAIKANLSSVADMESLVSTKTTRNHNGSGSISRKEDIKTEIAAVVVKVLPNGNLVV  
QGHQEV RVNYELREIKVAGIIRPKDITSDNAIRTNQMAEARISYGGRGIMSDVQTPRVGS  
QVLDIVSPF

>gene\_383|GeneMark.hmm|237\_aa|-|2410|3123 >NVVL01000007.1 Rickettsiales  
bacterium isolate NORP64 Contig\_source1382A\_2565, whole genome shotgun sequence  
MKLYKHALQLLLLQILLVLIASPAFSFGRDDFVAQTIYDLLQEKSQDKRIIFEPKYSSGK  
KMDAIKTHLEDIKTITLGKFEPSRSSFRAIHYNNGKSDVLSGRYESYILVPVAARYIKF  
GSVIQSIDFTTKTRLVSLAQGYATEESEIIGMQSKKYINIGHMFELRELARPLVIKTND  
PVNITYSVSSIHKTVGVAMGSGVGDMLRVKNTSSGAILLQIINKNTVQIGGNE

>gene\_384|GeneMark.hmm|262\_aa|-|3350|4138 >NVVL01000007.1 Rickettsiales  
bacterium isolate NORP64 Contig\_source1382A\_2565, whole genome shotgun sequence  
MTIALHTAVTGAEAQQTRINIIAGNVAAVNVVDGYKKQEASFADIFYTNLKKAGIENSEA  
SPRPIGAQIGMGVKLVGTYRNLAQGPLNQTFRALDMAIAGGGYFAITLPNGRVGYTRAGN

FQKDAQTGNIVTSKGNPLTNGIAIPEGINVEDIQISDNGLITAQDPDNPVGLIEIGQVEL  
FTFPNESGLEAIGDNLVETVGSGEAVNIDDLTGRIKQRFLEGSNVQAVEELTKLIEAQR  
AYELNTRVISTQDKIMETANKI

>gene\_385|GeneMark.hmm|265\_aa|-|4323|5120 >NVVL01000007.1 Rickettsiales  
bacterium isolate NORP64 Contig\_source1382A\_2565, whole genome shotgun sequence  
MESFTTKASKLFLCLIFLSGLLGFAQCACANIASYISLSSQIARQTQLDVIANNNTANANTV  
GFEQDNLLLRPVPLKQDKKKDISFVWAETTYRSGDDGPLRRTNRPTDLAIAGSGYFKLRT  
PKGDRYTLDGSMIINNQGILVNHSGFPYLSIEGAEIEIPNEWISIDISQNGVIFVDEEEEV  
GQIGVFQFESADPVIKEGKNLYAIQGKDRVLEDFTVISGALRGSNVNATLAMAKMVMEMQR  
AFGLVSGLVSKIEEVERSVISKLAK

>gene\_386|GeneMark.hmm|207\_aa|+|5290|5913 >NVVL01000007.1 Rickettsiales  
bacterium isolate NORP64 Contig\_source1382A\_2565, whole genome shotgun sequence  
MAEKKGENEEEEPLTPDEAKDGAKGGDKGAKGEDGENAEDPASAKKKKIKLILAPILI  
IALGTYLFFLVKAPKHDDAAALDAHSAERGDGHGGGHGANPIKAKVNTYLDIDPITVSL  
LSTRIKKEYLKLDTLRLSSEHDSTTLETMPPIIKDALITFLKTLRKSDFNSSSSTIYLK  
EEISKRINKIAAPIMIKEVLFQEITVN

>gene\_387|GeneMark.hmm|318\_aa|+|5920|6876 >NVVL01000007.1 Rickettsiales  
bacterium isolate NORP64 Contig\_source1382A\_2565, whole genome shotgun sequence  
MAEKEKKPDDKETKNKNNNNDDAHGSGVKEMLEQLSQSYDKLPMLEIIFEKFKIRKLSTAF  
RNFTSEPMNISISESTSMRFGNYFESLKNPSSIVVFKAVEWDNLGLLILENDMVFSFVDL  
LLGGKKNVQNKKEDKERILTSIEQGLARQIAELTLELQGSFDQVPTTTFADRLEINP  
SFATIARPGDAIIVLKIVVEDEQVKNLELVIPYKTIEPVKEQMQQIFLGDKFGADHEWE  
DMLSDSIYGVLEPIEVIINNKSTSTVEEICKLKIGDTIVMDHAEDKDVIVRSGQIPIFTGK  
IGKVDNKVAINLKNLYEE

>gene\_388|GeneMark.hmm|184\_aa|+|6882|7436 >NVVL01000007.1 Rickettsiales  
bacterium isolate NORP64 Contig\_source1382A\_2565, whole genome shotgun sequence  
MLLLDFLLIMVTICVGYCWVLNRRRIHDLQNSRIEFARMIKELNASIVKAENNVNEMTEL  
SKVTSTEIKVVVEEAKEATLELAAITEMANQLSEQLSAQFSFDDSKEEEEADSEANSLHS  
KESEKFTDEDLAVPAGKAEGNGKSYTNDLKNFITNIVTKKPEDQGVNQLNQMNYDTRLKI  
NAHK

>gene\_389|GeneMark.hmm|218\_aa|+|7433|8089 >NVVL01000007.1 Rickettsiales  
bacterium isolate NORP64 Contig\_source1382A\_2565, whole genome shotgun sequence  
MKASLFPILILLITLFIKASSLFGRIQEQTSYALDTSATSMLVNTAYAGGHKKKAPPP  
EPKKMLPAMPKAKKSTGTSMVNNLTRSEVNLLKELSKRRDKIDKEKKALKLREQVLKET  
ENKIDKKVTELQALQSQLEALMKKYEKKEHGKILSLVKIYETMKPKDAAKIFNELEMPVL  
LRLVSNMKEVRVAPVIAGMNP SKARELSIELAKQKPIE

>gene\_390|GeneMark.hmm|261\_aa|-|8363|9148 >NVVL01000007.1 Rickettsiales  
bacterium isolate NORP64 Contig\_source1382A\_2565, whole genome shotgun sequence  
MDKKVDMNREISMNRKKVSINRMVTKKQIFAFIAALIIAAPFSGYACDSKKEGTYLNIS  
ASTHSTAGNDLLVAKLRFEAEGDDAKALQNTVNKVMKLALAKVKKLKDADTSTVSSVYKS  
SSRGKKDAPRKIIWHANQTMTIKGFEEIILTLTGKLNMGTLRSLHYVTSLEKEEEEIR

DSLMEKAIVKLITKSKRVAVAMGKKDIEIKSINVDAPHFPMNPAYGQEVSLMGASSKNAP  
SASPGTNRVTMTVRASVLIKD

>gene\_391|GeneMark.hmm|555\_aa|-|9176|10843 >NVVL01000007.1 Rickettsiales  
bacterium isolate NORP64 Contig\_source1382A\_2565, whole genome shotgun sequence  
MLTSLHIKDFILIEKLDLDFNEGFCVITGETGAGKSILLDSILFCFGGKTSTSLVRPGAD  
SCSVAISFASDDAAKYLSDIEIAGSEIVIKRVQNVQGRKKFFINDQLVSAKATGQLFG  
CLLELHGQHNHTKLVTPAAHLEILDEYGGFSAELRELAGSYRNWQDLEKEIKQLAKDREA  
LAEIEYLAHSCEELQKSQVQLGEEDSLADMKRKLQNRDQEI AKINDILRDL DSSSIEQI  
VARSQRSIDSFGEHDLLEKVNSNLEIMYDKIEDSKTILTQILQEFQNI DQSAEEVNDRLY  
EIRTLARKHSCAPDDLPDFLAKSEEQLERLEARLANSANTQNQAKQAKVLYFEQATSLSQ  
KRSAAARELAEKTTKELGSLEMKKAIFKVEVNSPGAPGAPGASEKVATLKGIDSVRFIAS  
TNPGM APEPIDKIASGGELSRFMLALRVALFDKAAKQTIIFDEIDVGISGSVADSMGERL  
KLLSSVVQIIIIITHQPQVAGKADQHILVEKTQHDTHTSVVAGNLGAEGRSLELARMISGK  
RITKTSIEAAKELII

>gene\_392|GeneMark.hmm|247\_aa|-|10884|11627 >NVVL01000007.1 Rickettsiales  
bacterium isolate NORP64 Contig\_source1382A\_2565, whole genome shotgun sequence  
MNYIKLSLIALASFALV SCKSKPKD TDAITPAAEIYQAGVGM LAEKQYKNAALEFEKIF  
FQHPGNEITPRAELMQAYS LYLDGEYDEAVD VLEIFIKLHPRHSDIAYAYYLKALSNTYQ  
ISNVKLDQSRTRYAREGLREVIKRFPGTKYATDAALKIDLVNDHLAGKEMMVGRYYLNKK  
NPAAIKRFQTVIDKYD TTSHTPEALHRLVESNLMLGL TEEAKKYAAVLNHNHYHDSQWYG  
YSYNLLK

>gene\_393|GeneMark.hmm|454\_aa|+|11809|13173 >NVVL01000007.1 Rickettsiales  
bacterium isolate NORP64 Contig\_source1382A\_2565, whole genome shotgun sequence  
MLHVFNIMKELFSRVFTALLVIQLYIFGACAGDINYTYSKDQGLYVNFDDL GKVKIGADV  
ECGFVRD GALYASFGVEAQIFKCSKVLSFDGITNNAEEAGN WFFKLDVAPLYESIKVEK  
KERKIYKKDSKGN DIDGNNHYVDWYKNLGSRLYYLGN IPIEAYIGYKNTQH QIKLGRVK  
TIMGLADEEVFFGDDAKFAPMGHWLTRDLFSGIDYGF SHSLADIN VALYSGGNPTKGYSY  
YLGGVETPNLKS NNTPSFAGKV KLYSEFLGEDIDGYVFAS YLSNMTGSTWDNETQD GKR  
NASVIAYGATFKFNTGN KYLNSIGFFGQYNQYISGLREKGSQNDGSKKFKDIKQSGYFIG  
TELKGFDDKISLGAAYEKIDRFDYNLFQYNFADNNP FKNKQTS LILQAKYNISSIVSL  
VMAYHKISNKALFASDILDTRKTNRMKIGLRVAL

>gene\_394|GeneMark.hmm|164\_aa|-|13429|13923 >NVVL01000007.1 Rickettsiales  
bacterium isolate NORP64 Contig\_source1382A\_2565, whole genome shotgun sequence  
MTKEDKLIFGVISSAHG IKGDLVKS YTDPAQNLLSTNLV NENGEVVALKFLREKAKGS  
LVCKFSGSNDRNHAELLKGTKLYCQREDFSQTLDEEEFYFEDLKNLDVRDDSGNKIGVV S  
NVANYGAGDIIIRFDS DSKEEMFSFTKEFFPHVAKDHVVFAGK

>gene\_395|GeneMark.hmm|865\_aa|+|14007|16604 >NVVL01000007.1 Rickettsiales  
bacterium isolate NORP64 Contig\_source1382A\_2565, whole genome shotgun sequence  
MKKLLISIVITGLIFALITASVSITDFSRVYQDFTKSARIDMPAMEKSKFRIKKFPIPY  
IIIDEINQKDN IKLNIEVHFHTPLSLLMFDPKIAEIKIESAIKYINHDDVNFLTHHEFIA  
ELISEGALS LQAKIGRLT FIESDGDSPLEIEDFIYESADGITHFHGKIDKSSHITGSFAQ  
SGDEV MFKLNMD D DYHYNV SIEEKYKNAALES GKVKIVTDRLSTNLSNLIPDVNKIAHMLS

SSENVTITFDIKPTQNHTEFKNILITSSFLSGKGEAILSTDVKHASVVDVDFSDQIDLAAW  
SKDRAPEMKSKDNREGEEHHHTIYRKFDNFHNLKLNITANSVKLNEHSTLSKVNIAANIG  
EGALLIEDFSGKIDQEGKFNITGGVVQNSFRSLFNGKIKLHHKDLNDFAEIFYGKESLAK  
NAIPFYSSDIKLSSVDLSLRNLLLKTNEAEMIGHISTKFIGNTRTNATVKFSSMSLDD  
NNFPVMPGMLQKFISFADGMKKPDYLSKFTPIRQINSISNYDLSFDKLTYNRGLYENVRF  
NLELSPSRASLEQLVIHSGDEFIDTTLTLETNDIKPTLTITIHNAYARANFLSAPSLAL  
KNRILEHFDLSKINIIMDCSFKKLYDDNVVLEKVLVFAKSNKNLLRISKFSANLFGGRLQ  
SSGSILLEPYTLNFVYALNSAQIDEIAKLFKPNFLNIGGIMSANGAWSTRGEKPNQLLYN  
FYTKSDIIAKNIKINNFSDDFVKKINLPSYNRANLSKDIKALLTGSTTILDKTSVEM  
TKGILKTTSAAFKTNYSAGSSAALFNIYDFNLDSSSIFSYLTAPKNSSASNAEPTQIGI  
TAKGQLFSPKKEATYNKLEKALKAR

>gene\_396|GeneMark.hmm|380\_aa|+|16799|17941 >NVVL01000007.1 Rickettsiales  
bacterium isolate NORP64 Contig\_source1382A\_2565, whole genome shotgun sequence  
MTENDNQDQDLMVAEAEQTEEDAKVEASMAIIKAVKTAEEAELAKSRPPAEDTALAELVE  
PESHEEEEGEYLSHDPLICGTLAVKSHAIEFLQNYLPAKVQESVDLSTINVEPESYVEDT  
LRKKMSDLVYSVKTKDGRDAFIYVALEHQSTVDRMISFRLQKYMLLLWERHKKNKIPGKL  
PIIYPLVLYNGKEYTAPLNFWELFEDPVLAKEVMGGDYTLIDLQSMHDNEINYNNTSL  
VLSVMKHIHDDTLNMLDLLFGRCKVALSLDKKEDYLLLRMVEYTNPKVPVEKRKRLEK  
VIKNHLSKKEGEIAVKTIKDSYKEEGRVEGRVEGAEHKSLQIATNLLNQSLDKSFVASVT  
GLPISEVTQLQSNHSAGSS

>gene\_397|GeneMark.hmm|429\_aa|-|18081|19370 >NVVL01000007.1 Rickettsiales  
bacterium isolate NORP64 Contig\_source1382A\_2565, whole genome shotgun sequence  
MAGKEMTEEFELKINNETYKLPKSSIGPDVVDVTKLYAETGYFTYDPGFMSTASCTS  
KITFIDGGKGVLRHRGYEIGDLANNKDFLEVSYLLKGDLPNAKEYKGFKDEIHKHSLVN  
EQIRNIFGAFRHSAHPMAVVLSVVGSLSAFYHDTIDMNTAEGRELCAIRMIKMPPTISAM  
TYKYSLGQAFVYPDELPAENFLHMMFATPNKKYKVNPLAKALDKIFILHADHEQNAS  
TSTVRTSGSSGNPFASVCAGITSLWGPAHGGANEAVINMLREIGTIKNIPKFIKAKSK  
EDPFRLMGFGHRVYKNYDPRAAVLRDTCKEVLAELGQLKGNPTLEIAMELERIALNDQYF  
IDRKLYPNVDFYSGIYQAMGIPSQMFTVLFALARTSGWISQWKEMSEDVEFKITRPRQL  
YTGHVSRKV

>gene\_398|GeneMark.hmm|447\_aa|-|19881|21224 >NVVL01000007.1 Rickettsiales  
bacterium isolate NORP64 Contig\_source1382A\_2565, whole genome shotgun sequence  
MSRRKVEDSAEANTEVIEKLVAKTRENSEHDNPFNPQLGGDGGNGGKVSFNSEDAVSTP  
LPPLTFATFNACTDTRVEEGSNNITHSEWRAEARMKPKVLETLDKLGTDIIAIQELRNCPK  
AKPPFNSTGPVNDHLEHSGYTTSVTFYRDGFQSEGASRYILAFKESRFTHIETETKYFTQ  
SPDKFTDDYFASTYTTLNGKQEHVEAVKDHNFVGMFFFERGIQVTRFLDKETRETLICIFNVH  
YPIPKDLRIKASELLRDFQAQAEQELHPNIKIIIAGDFNSFPNWGGEEQMKPLIEAGFVDA  
LTDATFPNETPADSTFYAFPYDLSKQKQLNAAIESWKEQGLSTAELALNIDNFYLEEGR  
KSCEIIDHILVLQQEGSMQNTVVQVQPLFDNFTGYEPEAIGEYVFSHAHGGDSELGPAFA  
SDHMPVSTTIVWDREVPALGDNSGGDF

>gene\_399|GeneMark.hmm|141\_aa|+|21722|22147 >NVVL01000007.1 Rickettsiales  
bacterium isolate NORP64 Contig\_source1382A\_2565, whole genome shotgun sequence  
MTQAQIPQILSQHLNLTSLERNVAADFDSLTPNIDISGDYNTAIDTSKWEVTVDLRVEM

SYKNGLALSILQYVATIDATDVSDADLDIFLYLEYPMLLLELRKVVADTTMAAGVHQV  
MLDPWDLSRQFAAELEGKNG

>gene\_400|GeneMark.hmm|345\_aa|+|22153|23190 >NVVL0100007.1 Rickettsiales  
bacterium isolate NORP64 Contig\_source1382A\_2565, whole genome shotgun sequence  
MSSEKPGWVKHTWKTQRSFTLPSIMLKGAAGGNIALNVASVAKTYGRFDTATAINYLNE  
QTSGMQPKKKRRIKWGKIAHDVIVPTRLVAAGFSALSLOAKKAEIGTNSAFARGGLRAIR  
LLSGIAELALHAPELATTPIAHLARATAKAANKGRLCVARKLLSENTTQDEPEQRPNVEI  
KGTSLASAAAIRRRPPRMQRRQVSFSESEMDYSDSDEDFSSDEDLSFDPDIQEEAPAIT  
ERAYHPALDSNTSKVDLAETKAAPAQDSGATRRITSSDKETSSLDKEIVSPAITS  
KKPALAEIKTILAQHVSNETKIKSPGITPFTRREHKGKTGTPDR

>gene\_401|GeneMark.hmm|936\_aa|+|23333|26143 >NVVL0100007.1 Rickettsiales  
bacterium isolate NORP64 Contig\_source1382A\_2565, whole genome shotgun sequence  
VTKDLERTGFLFGSNSVFIEELYQKYLEDPASIDPSWIEFFSTQTEFTPLKTTSKIIKD  
APKTQNKATSTSAPASALKEDSLRAKFMIMAYREHGHYLANLDPLNLETKKTREELKLT  
EDFGFTKDSLANEIDVTGELSGVSACTVGEVLSILDRTYSGSLAAEFHVESHVSSGEKEWLY  
EQLENANTHPSFSLEDKFKFLQDLVEVEGFQYLHTKFSGAKRFSIEGGDASIVCLDRVI  
ELSAASGAEEAVLGLSHRGRSLTLTKVMGKPYCAVLSEFMGTSAFPTNLNISGDVVKYHMG  
FSSDKVTRNGHKIHLSTLPNPSHLEAVNPVVAGKVRKQDCMGRDRSKVVGILVHGDAAF  
CGQGIVAESLVMGLVPYEVGGIFHLVINNIQIFTANANDSRPGRYCTEVAKMVGAPILH  
VNGDDIESVLLATKIACDYRTKFGRDVVIVCYRKYGHNEGDEPMYTGQMYNIIKTKQ  
TPAAIYAEKLVSQLVDAEYYPGLKQTFKTLTLDSEFAQVEEYKPRQWLEGHWSGFERSN  
DAKLTTGKQAEKLLCKSLCTIEDSFPLNKKLAKLFAKRVESVTNKNTLDWASAEQLAF  
GTLKNNIPIRMTGQDVGRGTFSHRHAVLHSDIKSIYEPLNNSDDQAFIEIADSNLSE  
YGVLFGEYGYSLVNPKHLVIWEGQFGDFCNGAQTFDQFISSAETKWLRLSGLVCLPHG  
FEGQGPEHSSARLERFLQLCAEENMQVAYPTTPASIFHLLRRQVMRNRKPLMIMSPKSL  
LRHKLAVSDIKDLDEGTSFEPVIDEIDADVSAKKVKKVIFCSGKVVYDLLEKRRASNIND  
IAIVRLEQLYPFEQDLIVKIIKKYSNASTYVWCQEEPKNMGAWSYIRPYMEASLEQTGK  
KMIRYVGREEAASPAVGYLHLHNKQQLVNLKALGI

>gene\_402|GeneMark.hmm|424\_aa|+|26133|27407 >NVVL0100007.1 Rickettsiales  
bacterium isolate NORP64 Contig\_source1382A\_2565, whole genome shotgun sequence  
LEYSKERKIMSVEIIVPALGESVSEATIAKWYKPKGDGVKVDLLELETEKVTLEVNST  
AAGIIESIEVGEDDTVEVGQVLGKIKAGAAPAESAGGTSAGASTQATTAAPAPAPQSGKS  
VDPAKTMPPSVQKLV TENNLSPANIPATGKGGRINKGDVLAALNNPAAGAASSAGVASSA  
GAGASTAPIADEKPVQVRMSRLRKTIAHRLKESQNTAAILSTFNEIDMSNVIALRKKHK  
DAFQEKHGAKLGFMSFFVKAVISALKAVPSVNAEMEGDDIIYKHYYDIGVAVGTEQGLVV  
PVVKGADKMSFSGIEQIVSLATRAREGKLAMSDLTGGTFSITNGGVYGSLLSTPIINPP  
QTGIIGLHNMQRPIAVDGGKVEIRSMYIALSYDHRVIDGKDAVTFLIKVKDAIENPERL  
LLDL

>gene\_403|GeneMark.hmm|234\_aa|+|27535|28239 >NVVL0100007.1 Rickettsiales  
bacterium isolate NORP64 Contig\_source1382A\_2565, whole genome shotgun sequence  
MSKSHIFLPIMAVVLFIILLWSFGSSYFNIDTLRENQLFLKNHVANNFLSTFAIYFLLY  
CAIVGFSIPIATLMTLVGGFLFGQTIGTIAVVTAASLGCCIIFSGVRLVSKNITNKRLGK  
WIKMQQGF AENAFLYMLTVRLIPIFPFVIVNLVAGILQIRFRDFFLGTLLGIIPSSFIY

VSIGVSLQELLARPDFSLYGLLEPRFFLALTALGILALLPVIYRKRKADASED

>gene\_404|GeneMark.hmm|62\_aa|-|28321|28509 >NVVL01000007.1 Rickettsiales  
bacterium isolate NORP64 Contig\_source1382A\_2565, whole genome shotgun sequence  
LQVLSLSVKMALSLGVMFMKKNPKLTAIDIANYFLVLDREAGDVITHLKLRLQEGVRI  
FC

>gene\_405|GeneMark.hmm|463\_aa|-|28691|30082 >NVVL01000007.1 Rickettsiales  
bacterium isolate NORP64 Contig\_source1382A\_2565, whole genome shotgun sequence  
MVQLIEFSYLISAICFIFALKALSSPRSARSGSIVGMIGMGVALIATFNLPFAQKIPLM  
IAISSGGIVGAIARKIPMTEMPQLIAGFHSFVGLAAVLVAYTVLLSPAHFVIGVSGDLP  
VGALIEMSLGAAGAITFSGSIIAFGKLGKLSRPIKFFAQYVCLLSLSIIALIYCF  
TQSESLIFTLLVTVSLVGVLLIVPIGGADMPVVISMNSYSGWAAVIGFTLGNLLI  
ITGALVGASGAILSHIMCHAMNRSFNIVIFGAFMKARESSGDSVEDDRIAKISSAEDAAF  
LMQQADSVIIIPGYGMAVAQSQHAIKEMTDILRRSGVRVRFVHPVAGRMPGHMNVLLAE  
ANIDYEDVLELDEINDFSSTDVALVIGANDITNPSAKTDKTSPIYGMPILDVEAAKTVL  
FIKRSMAPGYAGVQNELFFRDNTLMLFGDAKKMVENIVKSMEA

>gene\_406|GeneMark.hmm|132\_aa|-|30094|30492 >NVVL01000007.1 Rickettsiales  
bacterium isolate NORP64 Contig\_source1382A\_2565, whole genome shotgun sequence  
MREQLPSAIKEAAEISQKAAELTEKLRDISLHAPEVTGHVVDPLVFAVTIFALSCFIGYY  
VWVKVTPSLHTPLMSITNAISGIIIGALISASSAEFGFSSALGFIAAFFAAINIFGGFI  
VTERMLEMFKKK

>gene\_407|GeneMark.hmm|375\_aa|-|30497|31624 >NVVL01000007.1 Rickettsiales  
bacterium isolate NORP64 Contig\_source1382A\_2565, whole genome shotgun sequence  
MKIAAIKERVKGENRVAITPDTAKLFTQKGYEVFVEQGIGDKANFSDLEYEKAGATVSAI  
PLEILSDADIILKVQATELVDEFNEVAMAKAGALIIGLLSPYTNISKYLKKSLEKKLSTIA  
MELVPRVTKAQNMVDLSSQSNLAGYRAVIEAAYCYDRAFPMMMTAAGTISPAKTLILGVG  
VAGLQAIATAKRLGSIVSAYDVRAATKEQVESLGAKFVYPSSESGSDAEDKSGYAKEVGED  
FAMIQKRFLSEIIAGFDIVISTAQIPGKRAPMLLTKDMVAKMKPGSVIVDMATSSGGNIE  
SSSADKIVSKKGVKIIIGWTNMAAKIANDSSKLYAKNLYNLLNYAIKSGEFDKDDLVEEM  
LIGKNGMIINKKFKV

>gene\_408|GeneMark.hmm|229\_aa|+|31721|32410 >NVVL01000007.1 Rickettsiales  
bacterium isolate NORP64 Contig\_source1382A\_2565, whole genome shotgun sequence  
MQNKTTKSHFALWQAIILMIILNIQTSSAKDIAGGNIVSGNISKKIKSYISNIGSIAVE  
FKQTDQTGSKAFGMLIIDKPYKFRCNYYRPFPIVIVGNKNYVSVYDYEMGHLSRIKTRDN  
IFNLLVDQIDFDSHFVLLAKEHGNNYIIRLKHNNLNKVSEISFNKSKHITGMKIFED  
NNVITLTFGKTVQIKDAARKLFTMKDPDIFGKPERFNRAKLEKNFKKAS

>gene\_409|GeneMark.hmm|522\_aa|+|32600|34168 >NVVL01000007.1 Rickettsiales  
bacterium isolate NORP64 Contig\_source1382A\_2565, whole genome shotgun sequence  
MLKSDSTYIPFARKYRPSDFSELLGQEVLVKTLTYCIKNHRLAQAHLLTGIRGVGKTSSA  
RIIAKTVNCTELKTSDEQITPCNKCKNCESFNNHNHPDIIIDAASRTGVDDIREIIESS  
EYRPLIGKYKLFIIDEVHMLSASFNALLKIVEEPPPEHVIFIFATTEVQKIPLTVISRCQ  
RYDLRRLTFDEINILIKRIAKQEKIKIDDDALKIIAISEGSARDATSMQDQAASYVLNI

GDSEIITAENISKMLGLLQSTMTVKLTQLIIANDPASAIALLEEYSNASNLEYFVQTMS  
DFMAELSKSVITTYHNPLYQSYSKEIADILVGTSLRSLWQIFSKGTQEIKLSHNEL  
ITAEMLIKAIYACNLPSEAIMDASKASGHVPASSKTSPALPDIKQNEEENIFNFLKYC  
SKQKEMEYIYWLLNDMELKNFSDGKMEIAAREANAFSGKIESLLKDWSDSWDKIAFSKQS  
DIVSLKDRMMEKVKNAGDYQVIKTHFPNANISDIILRSYEAT

>gene\_410|GeneMark.hmm|105\_aa|+|34244|34561 >NVVL01000007.1 Rickettsiales  
bacterium isolate NORP64 Contig\_source1382A\_2565, whole genome shotgun sequence  
MDINQLMKQAQEMQKMQSMQEDMAAQEFEGKSGGLVTITMTGNGEMKGVSIDPTLLKT  
DEKEILEDLIVAAFNEAKTKADEKSKDSMSGAFDGLGNLPSGLKF

>gene\_411|GeneMark.hmm|199\_aa|+|34585|35184 >NVVL01000007.1 Rickettsiales  
bacterium isolate NORP64 Contig\_source1382A\_2565, whole genome shotgun sequence  
MQKITGPDQLIYLFSLKPLGLGARSARRIVLHLLQDKDLRLSGLIDGLQDAAERMKNCKIC  
GNIDYTELCSICSETRDGSIIAVVETVAELWAVEVERSEIFKGRYHVLGSLSGSTIKNPN  
ILKLPELLDRCARNNVRELILATNSTLDGQTTSYFIAEYFKDSNIDISRLASGIPVGGEL  
DYLDEGTLSAALESRSKSF

>gene\_412|GeneMark.hmm|147\_aa|+|35519|35962 >NVVL01000007.1 Rickettsiales  
bacterium isolate NORP64 Contig\_source1382A\_2565, whole genome shotgun sequence  
MLKNIVIALFAAVLLSGCSSSTGRYGETQKHITFEKVVGDRVHFALNSSSLSPMAKKT  
LMRQAAWLKNHTAFKIRVEGHCDERGTTEINIALGESRADTVKRFLVSKGVSANSIDTIS  
YGKERPAVIGNNESAWKMNRRSVTSIR

>gene\_413|GeneMark.hmm|44\_aa|-|36042|36176 >NVVL01000007.1 Rickettsiales  
bacterium isolate NORP64 Contig\_source1382A\_2565, whole genome shotgun sequence  
LNRHALGATDFESVVYTNSTTEANIQEKYSGRIVQTYPASQEQ

>gene\_414|GeneMark.hmm|872\_aa|-|36356|38974 >NVVL01000007.1 Rickettsiales  
bacterium isolate NORP64 Contig\_source1382A\_2565, whole genome shotgun sequence  
PEKAVVPEQPTPAEPSSDVSPLVGDDASSDPSVGGQPNMQHDESKHDDIVDSKNDIVDV  
TKPSTSEFSETPQPRLRPAQPSVASEPEEGTEISDLPQPWEEEGALAEKSNPQDGSN  
DDAEVEAEPPIPGFSPDGKTPGGEEIAILPEEVREGAALDTGGAIPQPPEVFDKEILD  
GARELSLMPKNSPEREPAVAEEEEAEIDVSSASTQDIHTRALKYFDNDHAIKRRIR  
NLETRARVLKYLDISDSWEELEVYLDEAIDDLLEEIGDYLEELDNPSERSQTILDKLEKFK  
GDLEATYEAFFREEHSSLNPNIEFSDDELKRLNHLKTKHLSQNEMDALTSIAIEHVTEAQSAY  
SDLEQYIQLNNEEHQKSADEISQALQLTEQESSLHMLATEDKIELTGEALKRTTQEAQVEV  
FEIMQLAMDRFNAVMERDESNIATERLALRKQKQFPLHQKAGAESRERAIKHEMMRE  
LEAAKAAQAPRETGSEARKQARKNAALGNEEWRGQREEHAELEKRIAREPREASREI  
GKVNESPNLSSEALKQRSEAHAEVRAKIDRRRAQELDGETQERNQIEEFLKMQSGLQHLE  
TKKLIIEGKANIGTYQQEDEAYELAARNREEAIEQKSPPIPEPLNFPESPPPPDRSAPLNI  
NHDRFASQMEELKQRRDVARGLDEARADLSELSSPQGEGAREIPEDLHNNYEQLDELIT  
KSEQLSIPNKYDAYTMYGQNVPKDRLEEIREATVAQIDQRMTAIEDIQRDLDNAQNAEFQ  
EEHTAPKIQLSAAAPEETKSPAFRESGALSSSEAPQALAHSANADHTEKVIGRVTVKVRRA  
SLEAVRHLEPVTVASPSRGRGSGAEQGAQQSK



>gene\_415|GeneMark.hmm|503\_aa|-|83|1594 >NVVL0100008.1 Rickettsiales  
bacterium isolate NORP64 Contig\_source1382A\_2665, whole genome shotgun sequence  
MGVVERRGGTLLSDYVRSDEKVTIQCENNHEFEMTPSDVKRGRGRWCPKCSGCCPIQAE  
ERLKTVILERGGTLLSNYVKSLEKVTIQCENDHQFKMTPSSVSKQWCPKCSGQCPIQAE  
ERLKAVILERGGILLSDYVKDNEKVTIQCENGHEFEMIPNSVKSGHWCPKCSGCCPIQAE  
ERLKAVILERGGTVLSNYVKSLEKVTIQCENGHEFRITPSSVKSGRWCPKCSGKCPQAE  
ERLKTVILERGGTLLSNYVKDNEKVTIQCENNHKFDMPNSVKSGCWCPKCSGHCPQAE  
EKLKTVILERGGTLLSDYVKGKEKVTIQCENGHEFMMPPSDVKSGCWCPICNESKGERKC  
RVFLEKMNIEYVREATCKYLGILEMSRRRYDFYVPIYKLLIEYDGVQHFEDIAFFDNVPL  
KERQRIDERKTHVALEYGYNILRIDYTNLSTRQIERTLELTFEYINKGMVKNKPSVFLTDI  
FKYSYLNFKECMWIIPETVDNEI

>gene\_416|GeneMark.hmm|485\_aa|-|1728|3185 >NVVL0100008.1 Rickettsiales  
bacterium isolate NORP64 Contig\_source1382A\_2665, whole genome shotgun sequence  
MEFVQSKYHNLSVNVAEGLGASSDYVVTNDVLTILCKNGHEFEMTPSNVKSGHWCPKCL  
ATRAEEKLKAVILERGGILLSDYVRNYDRVTIQCENNHEFRMTPNSVKSGRWCPKCSGWC  
PIQAEERLKAVILERGGILLSDYVKNKEKVTIQCENGHKIEMTPNNVRCGQWCPKCSGWC  
REYPNNCPIQAEKRLKTVILERGGTLLSDCIRNNDMVTIQCEKGHEFEMTPSSVKGRCYWC  
PKCSGKCPQAEERLKTVILERGGILLSDYVKNKEKVTIQCENNHKFEATPSNVKSGYWC  
PKCSATRAEEKLKAVILERGGILLSNYVSIHKKLTIQCENGHKFVMTPTSTVESGCWCYGC  
LGDSRTQNEEKLEAVILERGGTLLSDYFRIHDMVTIQCKNGHKFKMTPHRVKCGYWCPKC  
SDNCYTQSEKFKAMILERGGTLLSDHVGIHRNVNIQCENGHMFKMHPYGVKSGRWCSCEC  
QNPQKQ

>gene\_417|GeneMark.hmm|206\_aa|-|3529|4149 >NVVL0100008.1 Rickettsiales  
bacterium isolate NORP64 Contig\_source1382A\_2665, whole genome shotgun sequence  
MSGYVLYIDGMVGSCKTSLCKRIKAFLVSEESQCKLFSRPINTKLLNLFISNPKNYAFAL  
ELSCLTNNRNVRENALSFASEGIAIVDRSVYGDIACATLQYSGNISTNEWAICVDTFE  
GIKEIEVPNEIEELYVLTNTTDDALNNIYNRGIDSERKYNAVYLERFGPIYFEVTKNIK  
VHKTGEIPMNFEEVRRLLRSFGIPSN

>gene\_418|GeneMark.hmm|260\_aa|+|4217|4999 >NVVL0100008.1 Rickettsiales  
bacterium isolate NORP64 Contig\_source1382A\_2665, whole genome shotgun sequence  
MFRGNHKKSLLVGLNYEGTDCELGGCENDVLNIKSMILDFGYKNGDIKVLMDKDIKIYN  
QKTTECKKENTIIRELKYMFKGCKAGDSFYFHYSGHGTSVPDNDGDEEDGMDEAIVLVIE  
NKDYIIRDDINEVLMPLKGVSVLVFDCCMSGTICDLQYQYDSNTKTTHLVNDKVIKA  
NVVMLSGCKDSQTSSDVYLPLRDDYFGALTTAFTEIVRLDKDISWEFLVEMLRNLLLERG  
HSQIPQLSSSNGETFNKIMT

>gene\_419|GeneMark.hmm|374\_aa|+|5045|6169 >NVVL0100008.1 Rickettsiales  
bacterium isolate NORP64 Contig\_source1382A\_2665, whole genome shotgun sequence  
MSEQLDDLIFLTKKIRVNHKSLTKVKNTTMLLSLKDRLDMVGLSELKESISLQTTMLI  
ELMGSDDELGMLNVILYGGPGVGKTKVAIILSRIWLSLGYLDDNGTTKEMIDTSGKYSQK  
LDTKSFVIPLLLGGYIWAMCKYAYGIVGLLILPIIFLLVLLAMVGYSYSSSFIGENKIL  
DDQIVIVSRDFVGDYVGGTAGKTRALLNKNLKVIFIDEAYSLINGPMDSEFGKEALTTL  
NLHMSMHPRRCVIFAGYEKELKNGVLKEQPGLSRRCMWNFRCKGYNGEELSEIFFRQMD  
KDGWIVTDKYDVIGLIENNIKLFSSYGGDTEKLGFYSKLDASRNSFHSDKSSNKTLNINN

IKIGLKYLNRNNKMM

>gene\_420|GeneMark.hmm|244\_aa|+|6262|6996 >NVVL01000008.1 Rickettsiales  
bacterium isolate NORP64 Contig\_source1382A\_2665, whole genome shotgun sequence  
MSKIVVSDPEKTS DGVS YEIRLPQCSTKPTS AVKLTRNLRLLQCKIVPIRTLKVVVRPKYT  
NEYKSSRTSWRLYKVSLSEGKGNVNISAKFQEGIEPTVRLRTMTATPKASRIEEDGNEY  
SNVDIETLTPKNNFFGNSAIVLTIETPFTFPKGNVSLKNRKTFFGGFDSHGKYKVTPRGKNN  
RTTKVPVDIARVERSIGNANENNDFYSTKEIREIAEDASIKVGAQATKGHIIKLILENFN  
TRTS

>gene\_421|GeneMark.hmm|1313\_aa|+|6993|10934 >NVVL01000008.1 Rickettsiales  
bacterium isolate NORP64 Contig\_source1382A\_2665, whole genome shotgun sequence  
MSSKVTRIKEPSKMSLSDRIKRYEVAKMEYGSYDERTGKTLPVRYVSNFEGVFMRFGDII  
LGQYRKGYNLKHAIALAFEYNKYMDLNDVYIQCYSFIEAKLSSSDALKYINEYLVGRKE  
VQMTKEDMERKIDIWDDSNLDIDGFVSRDYSAYTVIGTIMDSVKFDTSDITYTDVFTTYK  
INGKVLSSYYPTSANGPRIFDNMYVSEEIPYIRYKSNKDHKHIYSMDMGIDLRLIGNKNL  
STDKIFFMLLLGGPKSNSNSYAKVTIDLVSSTLELNISKSGLQSEEILKRLEKYLTCCKLS  
KLSSGRAKGVFMYGDIYIREIFLDIIMTDLGILFMNEVNMSSYPDRVRLNMFYRELDK  
KEPIVVEDNYIRNLSSVSFSITQMVSIQDDKVESDGSVSRKLPGRHYIKVDISMAATP  
EMAEFEKELMSYVFEYYKSQYETLFKLYSSIVPDINEEYILTRRLATRIQRLKSIAPEIF  
IKGYARMCQGGNRQPELLNKTLPYVYDVARKAMKLHNSNQYDPREDEDLVRTFDYISQR  
YNGLKLEELEDPEVVFSENVNRKVKSDNINKSIGLYTGGRKLSKFPKESIKGRKNYRFFC  
PDAKYKHPTILNNTLENSDVYDKLPCCALSDQSLKTSNSLYREYYEGIKVKKSKKNPKPI  
SSLKTLDVGRFGLVKEMRDVLKSVSNKYNYFRYGVVRSKNSFVHLLPLYLSDDDNYSE  
ASFTEKEKMOVDFRLALAKSVNHSVYKQELYDRSGKEIKDMI EDTNSYFDPDLFYRGIEE  
FLGLNVVYFEYDTQKKEDERSFLSSPRFAKYHSRLFRDRKCIILKHWGSDRRVFPQC  
ELVNGNKTGSVYVDFREFNRNMYKFLFNVNSVMWGVENGRKVVRKNWYSRVNYLDIAK  
GAMGQVIDMYGKCRAIIMKTRGGNITMVTPTQPHDLIEYKNIDLGSITSVRDVFQRPN  
SVDIDGDNIVGLWYSCMDVPNAIYFPVVRTQITSEYRGYEIGPSSPINMRVENTTQGTGN  
MNIKLGTSIARVNTIRKTIKIFLQLVTWIYLIYLRNGNTLENLIKRLVVLDTKRRHMDS  
YDLYNGDKLPLTLPDVVSIKSAYEYIDNNSRGFVKGKGTNKYTFLMYSKKMREYVIYFLNS  
QIKKSMGLLVNIPTIIGVYVSSSEDFKKQKNSRLFTNMFQMKMWSRAQSRRKYKIIYTKL  
DYEKYDGTKEVIYMNHNGDIYTIQNINENMFGSNIGSAMSANTWKFRGINTGQATPITN  
LKHPhVLYEISKSGILEIVEDNSESSDVPLELLRYRYNNTKSYAAMLVMSSG

>gene\_422|GeneMark.hmm|1082\_aa|+|10990|14238 >NVVL01000008.1 Rickettsiales  
bacterium isolate NORP64 Contig\_source1382A\_2665, whole genome shotgun sequence  
MFNDKKSNI VSKSRNVEVEARFNEYSMGRGVS VHTFQRVLDILGPNYEETNTIDYIQNI  
NDGVGSYGGIRKTTQDGKKDVWITKSGTSVFKRNDY NVKLSMSTEIPTEPEEFTHNISR  
EKKRFSIDL VHSKVDMTIYTTNDKGSRS GPEYEIELELSD FDRFDEF GTYCFYVLSLIQ  
DTPYVYTKKEYNDVILGLNNSLGSGITNAGNRKNIIDSRMLTKPRNLHLSDMVYGGLVGN  
NITRYNVLYKADGKRKLFVTHGNSVWLLMYP SFVSKIGNFDGTVPNIGGFILDGELIESG  
NDDDNRFLIFDVLSVPEGIPSTKIQLPFSHRMHNMGENIEMLNKLDLTTLRMKYFKQ  
ITDVSSFYKIMNEMESERGNLDYETDGYVFP EIIHRSVSKFSSVNQYLPTRKTHNRNLK  
KTADLCKYKPPNMITIDFAVYRNSDGLIELKVM DGDISTMFEPKYPLAFDGLTMVDHDNE  
ITANISDGTIVEYKWDTRMLVPVRIRSDKVRANS KAIAYGDNWNMMIIPKLSTMLGKDI  
TLMSKYHNSIKSKIYNKSSKSFKLMPTLLDIGSGKGGD GKWNGKFAKVI AVEPNKEYII

EFSSRCHSIMGFVPQVIENIRDIKKIDSSKRLILINAKGENHELITKVVKKYTGGKVDVI  
SSMMSLSFFWENSNIPTNLMKTIRNNLSDSGEFITTTIDGDKILETFKPPIRVPTDEISN  
MLKLNDENITMEFNGNYINVDYKGTIVSKQKEWLVLHLSLMLLELKRYKITDVSDMNERF  
VSPGANSIIKLYTSGKFVPMKATKINFKGGKIVKRVVRKNVGVGMFVPPKKTNEKAEIKT  
KIIETSEIPIIIYRIKEGSELYPMFTTLNKTGVGHGIDSTSEVVLTDGTDVIKVTRI  
SSNRTNSFFDCILKMAYHEYASNSDYIGRMNALDNIKRDVISILGSPSKGGTQYDFVLDG  
ILPFYAQKEKEGNIYVDRLGNIISYDLAKMQKAMTESTTSLDLYETVAGFLLVDLYVLD  
MNKEIDLLYFPYSQVKEKSVVIMSNSDGRCEGIGIKNNLIQSTFSKESDFIRMLRETS  
DF

>gene\_423|GeneMark.hmm|205\_aa|+|14287|14904 >NVVL01000008.1 Rickettsiales  
bacterium isolate NORP64 Contig\_source1382A\_2665, whole genome shotgun sequence  
MLSLSKEIVKLPWTRSSVYRLKTIGDGSFFHALSLSYLPYISNISNGTKFNRRQFVKD  
LRLDLSNRLASKVDKFDKNSKTFYEYLSRGLHEMSLVLDKYKLYNMQEELKSNSPVDNT  
YNEFISEILDKDIYLIDIAKMDVYITGNDMDLLYKGRDSIVIGIIGNHYELIGTMNNLGI  
MSTLFSSSENKFIIDIKNRMKIILGV

>gene\_424|GeneMark.hmm|269\_aa|+|15005|15814 >NVVL01000008.1 Rickettsiales  
bacterium isolate NORP64 Contig\_source1382A\_2665, whole genome shotgun sequence  
MSGGDESENLSFSVTFDFGYSFRNMVEYIRSGNKVGYFIFSKTLITYIEQDNTGIVLNKI  
TIKTDELVEYVCNSETPIYVGLNFDELRSFTKPIKKKDSIKLYKIKNKPTVYIEVLSGSN  
SHRTENVASIRISNIEKNVYVTLPESTNSKASCVISSTNFSLMCSGMSTIKSGFVEITNY  
SKGMKFKACVGTGLSERLTFGIINEEDRVSESDLQISMLTIKYLSKLPTLCNTGTMKLY  
TNLVGCLLIRSHIGTFGEIDVYIKLKEKK

>gene\_425|GeneMark.hmm|258\_aa|+|15844|16620 >NVVL01000008.1 Rickettsiales  
bacterium isolate NORP64 Contig\_source1382A\_2665, whole genome shotgun sequence  
MDTERKLTKYTVFCETEKSWSVSTGYLEEVPTVCPNNNLHKIETVTILDVDTSLTKVVED  
TSGTQGYFKISGFSFDVDAGVGVITDHHIIFNYPIKVYNLMVLPKSNIGDLSVSIKDV  
HVGLLVGDAGKGVISADSVGDSVIGVDDITLGVVVLGFLVKGDPKTKENLGECISIDKD  
NKTITVSNNTSATYSTGDKILITIVKINNVEISTNDVLVFGAGKLGGMMLVPTKTTMTVQY  
TNTSTEAKRVVGFHEHDY

>gene\_426|GeneMark.hmm|320\_aa|+|16837|17799 >NVVL01000008.1 Rickettsiales  
bacterium isolate NORP64 Contig\_source1382A\_2665, whole genome shotgun sequence  
MKNFDEMVAITITAIIVISSDVNIGNLFPVIPIKRDVSKAKGKKIIIIGTDYGDIVSC  
RHDGTERGISKDSGFFRNASLYISCGTKYVSVKLTSSKSIQMCGLKSTEMMKQISEIVVN  
LINGVQSNISAITDDKDMGKRILDWFTENVSVANGKLRICKCPKFIENCAYEFLKSLMSD  
YVTVADYILHVKWVTTMENVVNEKLLIVSMKTSMVNYNYGLGFKIDRIRVRDLLRANPPF  
GARYINSIDHYVSVTPYPYVIEDGKSENIRKKSERNHTFLIYASGNTTQSGPHALVKEA  
YNLFKKIITENEESIICAGV

>gene\_427|GeneMark.hmm|452\_aa|+|18029|19387 >NVVL01000008.1 Rickettsiales  
bacterium isolate NORP64 Contig\_source1382A\_2665, whole genome shotgun sequence  
MGNCKSYPEPDTSNICTKDSIGSGDTTDHTLKHFCAPINGVLGGEDIRREYCGRIGSGEW  
EYQEGGSCNYNDCNKYQDVDSGCCSGCCGISGRKVLCKRKSYLEGDPDLSCLLDYAFDEN  
DSKCFNEGKTCFPENRDITSSQCDELVDYCTGVLDLDEDDTSWIDRWGNGSKCIYSLNRN

LFSSGVNVNITSGGYISPVFFNSVSGFESSKLIKTFKKYASQGFVGTLPGLSGYNE  
FQNILFKICESSPGICQTGLNNLCVTKTTEDLTRNVELIPWCGCYMPNGEYQKYIDTFQI  
NKECTPICARTGNIKLVDGDGITPVECSNDICVIDNVSIEISNSEVGDISFSQMC GGCSG  
SNVNHKEGERNLGSATCSCVISDLIDINASNSSIGGINLSQYCGKKT KCYSDDVEIDCDTK  
KVKKPNKIYGIVVSVIVLVIITILILISIIK

>gene\_428|GeneMark.hmm|156\_aa|-|19449|19919 >NVVL01000008.1 Rickettsiales  
bacterium isolate NORP64 Contig\_source1382A\_2665, whole genome shotgun sequence  
MGIELFPYETVAKMESVNFVLDKGAFLPVRGSKYSAGLDIFSNDIQVIPPKSRIVVKTG  
VKVAYIPKNHYIRIAPRSGLSVKEWLDVGAGVDEDEYRGYIGVVIHNNHKPTAFTVKPNMR  
ISQLVITPVSYASSISVDEATETERGESGFGSTGIF

>gene\_429|GeneMark.hmm|204\_aa|+|20149|20763 >NVVL01000008.1 Rickettsiales  
bacterium isolate NORP64 Contig\_source1382A\_2665, whole genome shotgun sequence  
MLLNKIIKAGKGLLFFDDYVEVGGNIKVRCHLGHVFKTSTHWWSTGNWCPHCEVSDMEWKT  
LYIIKIKGGFLINKYGDNNLMLYIRCSNNHSFDISVDGVNSGFWCTICAHNLYMSDNVIS  
RVRAEICRRNGIFLHLDNMNRSDVVFICEEGHKFKINMERLEMGSWCNVP HKSKNITKVN  
PNCRHATTKRYLWRPQHPQKDITL

>gene\_430|GeneMark.hmm|488\_aa|+|20830|22296 >NVVL01000008.1 Rickettsiales  
bacterium isolate NORP64 Contig\_source1382A\_2665, whole genome shotgun sequence  
MFGNLSLGTIYFNQRTLKFHSKKNMSLGKVI GSGAYGIVSEIKINGKMYAVKRNTVSVYS  
DGISCIREYDMLLRIGDHPNINKMVYHTTSKISDEGLGEELREGNIHFIFDKCQYDILED  
DSLIDNEDEIRKVIKSMLSALKYLHDNGIVHRDIKPSNILKSYTGEYELCDFGMSLYLTK  
QTEMSNSVTTILYRAPEMFLSQKRYSFNSDIWSVGCLMYELLTGERLIK RIPNGVKDFAQ  
VVCKIIPNAFNYLKGFVDIEMYDSETFECKLNNDYKTVDLLTKMLEVDPSKRIDASEAL  
NHKYFDEKDELIDIAFCSNKIEQNIESHKYVGISKTIKLMVKNKTYKPHSNIRSVFHCL  
DIYQRYMHWRKLNKSLKGVSLCLYTCMYISFKYFSPIEFQYTISDIFIVPKTMCENDI  
IDIESEIVTKALTGKLYNKTPLECVNDVKSHEDTILTEDEQILLFNLVFDNVGEMSSMEI  
AEKFLDVL

>gene\_431|GeneMark.hmm|325\_aa|+|22331|23308 >NVVL01000008.1 Rickettsiales  
bacterium isolate NORP64 Contig\_source1382A\_2665, whole genome shotgun sequence  
MLKLLLVGDPHFKKTNLDDMDILSFDVIKIEEYKPD AVVIMGDLH THESINSIVLCKC  
IEFLKQIALNVKLYVIIGNHDRINNSDFMSDIHPFTAVDMWENAKVISKTEKVTLVVRDK  
EYKILMVYPVYVGRFAEINTVDNPLDVTCLCHQEFFGCKMGGIISAVGDKWNSNPLV  
ISGHIHDYQRLGGNIIYVGSPIQHSFGSSNCGKISLFEFSDKVKETRLDINVKKRKTIYV  
DCVGMKSLKNITNSKYHIRIVIKDTKANIDSMMRTTKLPNVKITVKVDEVFLSANGGNF  
EEILIKEMGDNLPEISWYNYLSKGN

>gene\_432|GeneMark.hmm|1312\_aa|+|23345|27283 >NVVL01000008.1 Rickettsiales  
bacterium isolate NORP64 Contig\_source1382A\_2665, whole genome shotgun sequence  
MEGISPKDLILPPPYALSPSSLAKEQFEKVINEKLRSSVPGDMAVTTDFEKVRNERHRDL  
MSSVVYEGFAQDSIESYNNWIGGSLSKQITNRSILLPNGDYIRFKDVS IYPPTMTIKTVG  
PDGQETSSEKIMYPSTAREMSKTYLSVYARLEQIDSHGNVVGILHKDQDKLIPLCS IPL  
MLGSRYSLSYGMSSDQKLRVFECPHDPLGYFIINGGEKLLLLRDQLRVAKPLVYIDTNRN  
KIVICRITSWTLSGTTVVDIHKNSKHLYEINLYFLGNKRGVTGTICVMQIMRILWEMSG

GSNPDAFSFIEDVVKFTKSKWRDTIRRELYVSAVYTN SQPDDIATVMKSKGKRVTQENL  
KEFNEIVNSDIMKGRKCLKHAQTSKLEREEQFEDTKRGIYNDL FVHIDEYVESDEYSTFDE  
LNAIKIRRGSLKYYLLCCMVARLAEYKVCLRPLDDRDDWENKQITLPGKTLKRFVLVW  
RKSILAKMRKRAKDMHVDVNNIKRVIKHGNVTNKLKISFTANEWTHTKGNDYGKESVSVE  
LDRTSHMSVHSQHGKINTPTNRRAKQKAIRQIIESQIGFVGLAETPEGQQCGLVKQKAIT  
CMVSQDRNPEIVRNFLVTKQLLSNVYDVTNENMGPCMHGDNFIGWCNVGETR KELLEAKR  
NGTLKHDT SITIDGVVLYVYSNAGRPT RPLL VVGKNGKTVIENKNKWGESFRELTRNGSI  
EYVDPSEQNKFILADTLGTLVSKSERDSTLANLQRDLEKIRSGNPLYRNVKKIDFNDNPY  
EEKVNLTEL RILKEINIIKEYEIRSSNLKFDYCELPNALLGVNASLIPLNHDPAARNS  
YQCHMGKQSLGIFHSNQDMRFDTSSRALISPRGGLFNTQSHNWWGLDDMPSGDMVICAIM  
TQNGENQEDGISFSKAAIEAGLFRYTINKKHESVLKSDTSKGITEVFGVPVKRDGHPEGA  
YDFLDENGI AKVGSMLKRGHCIIGKTRIRQMPDGTVM EKDASVYVERGSEGIVDMVISPT  
PLYGGGKVIKVNIRSTRVPIVGDKFASRHAQKGVISSMVNKEDLPFTSDGITPDVIINPH  
AIPGRMTIGKII EITSKVTATTGEKFDATAFRNFDADEIANELRKN GYSGSGKEIMYNG  
ITGEPFEVMIFIGPCLYQSLKH FVADKISARGKGPLDKSTRQPIGGRSRGGGCRV GEMER  
DAFIAHGAANSLHERISSDLFTGVFCKYCGSFATSRVPLDMYGESGSTS KSVNICPRC  
SQSDGIVACNISSGFYLLARTLSAAAALDIVFDLRPETYSEEISRVRNIGILK

>gene\_433|GeneMark.hmm|211\_aa|-|27301|27936 >NVVL01000008.1 Rickettsiales  
bacterium isolate NORP64 Contig\_source1382A\_2665, whole genome shotgun sequence  
MNFSKEEILVVTETTKTLVVPKGIKKLICSDIGLET LILNEGIVYVDCSCNRLTELIVPD  
SVITLSCYRNLLTKLIATNNVTSLSCSNLLTELIVPNSVTTLHCYRNKITKLIIPSSVK  
YVICLCNPLEDLSGYNELIVPKVVS LYTMCHNAITSQDNIP SFFDLVDKVTCCSCKNKVV  
EDMSYIQFKGCNAGYVRKIIKCRKCYLDMGF

>gene\_434|GeneMark.hmm|300\_aa|-|28080|28982 >NVVL01000008.1 Rickettsiales  
bacterium isolate NORP64 Contig\_source1382A\_2665, whole genome shotgun sequence  
MNFSKEETLVVTKTTKTLIVPKGIKKLVCS DIGLET LILNEEVVYVDCSHNKLT VLTVPN  
SVTYLKCCNNKLT VLVIPDGVTYLD CSCNRLTDLIVPDSVIHLKCYYNQLTILIVPDRVT  
SLDCYGNQLTELIVPNSVTNLDCSCNRLAKLILPDCVTS LDCSCNKLTKLTPNSVTYLI  
CHNNQLAKLILPNAVVNLDCSYNELIELIVPGSVTFLDCFGN LLEDLSKYNKLIKPKVVS  
LYDMCHVMVNENNIPRCFSKVYKVTCDGCGDKVVKDSAYTLCEGNREGYIRKTIKCKKCF

>gene\_435|GeneMark.hmm|414\_aa|-|29208|30452 >NVVL01000008.1 Rickettsiales  
bacterium isolate NORP64 Contig\_source1382A\_2665, whole genome shotgun sequence  
MHFSKEEILVVTAITKTLIVPKGIKKLV CNRIRLET LILNEEVEYVSCSHNELTELIVPN  
GVTYLNCSVNKLT KLIVPNGATDLNCSGNKLT VLIIPNSVTRLD CSYNKLTTELIVPDGVT  
HLDCYYNELTILIPNSVTRLD CYGNRLTVLIIPNSVTRLD CHGNKLT KLIVPDSVTYLD  
CSGNKLTTELIVPNGVSHLDCSGNKLTTELIVPDGVT HLDCYYNELTRLTVPICVTHLDCY G  
NGLTVLIVHNSVTHLNCHGNKLT KLIVPDSVTFLNCSYNELTKLIVPNSVIYLN CYRNHL  
TKLIVPNSTTFLDCHGNKLT VLVTVSVNLVDLDCSSN LLEDLSKYNELIKPKVVS LYAMCC  
EIVNEKNIPRCFSKVYKVT CDECKNKVINDSAYISCKGYVGGYIIKTIKCKKCF

>gene\_436|GeneMark.hmm|167\_aa|-|30614|31117 >NVVL01000008.1 Rickettsiales  
bacterium isolate NORP64 Contig\_source1382A\_2665, whole genome shotgun sequence  
MNFSKEEILVVT EATKTLVVPKGIKKVVCSEIGLET LILNEEVEYVDCSYNKITKLLVTN  
NVARLYCHDNKLT ELTIPH SVARLYCHDNLFEDLSKYSEVIKPKVVS LYAMCHEIVKEKN

VPECFDGVNKVTCDECEDKVIKDLVYVSYRGHRDGYIRKTIQCKKCF

>gene\_437|GeneMark.hmm|330\_aa|-|31261|32253 >NVVL01000008.1 Rickettsiales  
bacterium isolate NORP64 Contig\_source1382A\_2665, whole genome shotgun sequence  
MGIKNFTSIFKYSSNSKTIKTFDFHSDTNFAIDAHNVIYAKFKTSVKKYIDIICLDDCID  
IGVIIDMTFESMMTYVKPMMAKNITPIFIFDGVPECKRKTNDKRKAERVKYELLAKEAK  
SNIDFTDIVTIENYKKYIIRSIYPDRDVMKIIMDKLQSVKIPTIQAKGAEKLCSSLCRE  
GICSAVISNDSDSLVSFAHTMIKSISRKGLECISLSDILTDLITFDQFVDICIMSGCDY  
NSNIPGIGICKSIKLIKEYKSIDNLPKLGNIILDKSILNYVECREQFGYTESNLLISDD  
CTLFDCGCENGIQQTNKLNIPFIITKLVIV

>gene\_438|GeneMark.hmm|270\_aa|+|32279|33091 >NVVL01000008.1 Rickettsiales  
bacterium isolate NORP64 Contig\_source1382A\_2665, whole genome shotgun sequence  
MYNHNNSKSGKCQEVRYVDGGIMKTKRGLCKGNIKGVKEVPIRKVKTLDNCVFPVKDICE  
IVLEEELLDIFVKHGISEEVITLLAHGLGEYATGERLSKLEHISKMYDILKTKNKYICNN  
CNGGYTFEYEVHSDIDDNVDKHGYQLDSQEDLQYIKSDVEMDIVIPYEINTNDEIVSFDV  
SINLFKCPYIKSDGLNIGYPNVQSDEKNKFIKGFSEKSSGNVTAYLEDDFLVITSFDV  
TLGTYSPODITLTFDPQDNMTLDIPLQVDA

>gene\_439|GeneMark.hmm|351\_aa|-|33160|34215 >NVVL01000008.1 Rickettsiales  
bacterium isolate NORP64 Contig\_source1382A\_2665, whole genome shotgun sequence  
MDKWEPTVLVLGSGGMKGFMEIGALVYMSKIGKLNKIDTYVGCISGAVICLLRICDYDYT  
EIMKIAYNVDSKFININLNTIVENMGLINSNDVSKLETLVESQYGMVPTLEQLYITTG  
KILTIVTYNMTKSRTEFISRDNMPDISCVDAMLSNIPFIFQTIKINGDIYVDGGIGNP  
YPVDIYDNNKTKILGMYIAEPKPKETTTGFILNLIHCQSREITSRIKGSSEKCKHIKLI  
SPTTDTTGLSFTHEIRTDLIMIGWNAAIKATRGEVCEVEMEDLMSSIIDNSGEEYYTDPG  
DSKNTNKKIISDSQSKISVKISNLSKLVLENRKCCLDLLNSDPQDNTCQRYI

>gene\_440|GeneMark.hmm|220\_aa|-|34273|34935 >NVVL01000008.1 Rickettsiales  
bacterium isolate NORP64 Contig\_source1382A\_2665, whole genome shotgun sequence  
MEEHDALDQVKSDEYDYDSEDETSTFDENDNAFSSSDVSEEEFQEYHPTTTKSESSRRLSL  
EAEEMLEGTDIDVKVEYVELEDDTLVETKEKEHRKWAPVIKTPHSNEKIKYIGLGES  
SSENKHSSVDVQETTKRGIKSPITKIKELPQNLISKNLGETDKHQNLRIDLASHIYNTNN  
ISPETAMDISKCVISKVESGTIYSDGIERIIDKINKSMVL

>gene\_441|GeneMark.hmm|197\_aa|+|34924|35517 >NVVL01000008.1 Rickettsiales  
bacterium isolate NORP64 Contig\_source1382A\_2665, whole genome shotgun sequence  
MFFHLYKMENKLDIISVVLRIIVLFLKVMESLQKPGVILAGSAVLVTVASTVYFGRAVGVL  
NSSVRDVEAQMEAFNKELESIKGFTIPKSIIEGFRNFKNVLSEINSSVELLSEKLDNNM  
HSISEMQDYMREDGKTIKEFVKLPRQTNRRARFEYRPDNRMYMERGGRPEYKRKYKNVGAD  
EYDVENAMERIRKSQGI

>gene\_442|GeneMark.hmm|280\_aa|-|35576|36418 >NVVL01000008.1 Rickettsiales  
bacterium isolate NORP64 Contig\_source1382A\_2665, whole genome shotgun sequence  
MEHKNKVLENFNSSNVVIGTHEKKTFFKGDGKEDGDYITIPISYKDGNTPTKGINLEL  
PLVTCYVKKGKFGYQMSIKLDRTGKVYNVIKALISINISVGRMANTKRGAFSLKEEINLN  
EYKCNFKDHIYRPRDDNTYEKLEVDPTLYLPVKSWSVFAIPVEQNGKIVSRDIKKENLE

NIKLEGHPLIKVSMYMGGGKFSLQLYLSCIIITKVTKVSEVELMSDILGNVSGDAMVEL  
GNNLAELGIPLMTDNPLNTEEDEKEEEGGDDIKAIEYKDL

>gene\_443|GeneMark.hmm|412\_aa|-|36468|37706 >NVVL01000008.1 Rickettsiales  
bacterium isolate NORP64 Contig\_source1382A\_2665, whole genome shotgun sequence  
MNSAVDNTWLFKVKQQSGEDTKVIPGSNLVLFDTDGNMSCVDGEDSVIISGRSVIGNYTND  
INIKYIHTKVLSHFDNFSTNKLTSELEDLKAMTLTNMGIFVKVKERISAIEEEMATLSNF  
KKEEYLKSLRILNEYDLVGPFIKHINFNDSEVEIDPMFGVRHNIIYKYLDLVKPYIFVD  
VVRNVKVSNNCKSCKNCLDNLIPQDGLTLCNVCIANIPYVTKTQTCSYNTVPSNHNKYD  
KDNFEKAFNRYQKQVDILPSNIVSVLDEYFKSVNIMIGDDVKKMSKAKIKKETSRTMMF  
NALKCIGLSSHYEDINLICHYWNWILPDVSDLEDTIMKDYDDSQEVFMSIKGEDRRSCL  
NVQYRLFRHLQIRGHECNHEDFKTITTGETFRYHQIMWEAICKELGWVYMDL

>gene\_444|GeneMark.hmm|77\_aa|+|3|236 >NVVL01000009.1 Rickettsiales  
bacterium isolate NORP64 Contig\_source1382A\_3623, whole genome shotgun sequence  
LYIYNSMYFRASLLFYLGVLVFSGSSSWLVFGFSVTSNLGFFKFSRFPKSKFPLIFSLQ  
AFFWLCAVFSTSLGHY

>gene\_445|GeneMark.hmm|1598\_aa|+|606|5402 >NVVL01000009.1 Rickettsiales  
bacterium isolate NORP64 Contig\_source1382A\_3623, whole genome shotgun sequence  
MERKDKNKRSSLAKLLVTASAVAMIAGSAGSAMAVALNVNADVPDLAVASNIGLSAPFAN  
GDDLTLGAFNITTANNVVIQAINVGLFTGQFTFTVGTGHTVGLTAGTMDMNVILQGVGSV  
FNIGVRDVTENVTVNGGAFTARHLTGTGAGNGDLTVTAGTAAVQNVAGFVNVSGGVVTS  
GTVGGTSLVTGDGQFDGAAGAASDVAGIVTINTTSAAMNTIKDAALAVNLEAGKLTMRHA  
AADVTVTGGELTMGNAATNVIVGGGKIIDFGVITGNLFTADAEVTTAAAAGSKVTGNVT  
TATDGGQGTIKFTANGLEVAGVIGADGAALKLVEVSGTQQDLTQAAAVTHYAKEFNVTAV  
GDNIRVADGASLNGNVTGLGFVDFRAGSTTGNLGTNAAALTKVVAGSNAVGINIGAGD  
HFVTAFESKNGASGFTFADGANVTGKIDNTQGNANGAIIFEGKSTVTGTIGGAGGVVAF  
ATVSVNGDAGSVVEVNDVVSATAITIKAGTFELKDTANARIITAANGITFAANGKLIKITA  
PQAVVNTHGVAADIITGAVNQGNIEVTGSAIFGDIGVVAGNGLASLEATKGTIELVAGVG  
GAGAGVHVKDVKLNEVVLLKLNAAATYKLGVSVELEADNKSTLEVNDNSTIIAIDTAAGLS  
FGEEGKVLKALNFSANAITLTLGNGVSIYAKDLTGTVVGNINTATITTTQGNNTLSFVNDN  
ANRLAAINVNGNAGEVTRLLGATFVDGNVLLGANTTLEIDSSITDVAANGGGIIGNAGS  
NGTVRFINEKGDKIEVTGAVGAGANTVEGIEFAGGDVKFNSKIEVAANSFTTAGADGE  
TTIEFVAATDVDNNTFTVADTADSAAKRTVILAKAVNTFGQEIASKDKAITFQMSNNVN  
VIVVTADAAGARFTSSDGKDLNLNKADVTIKSVGTGNTINGLFTENATVSEATIAKT  
TTVVAGKVANFNESLVGETAALGDGSIANFADGFILDSKVDGAADNDGILNFAGKASINK  
NIGTAHRVNLINFSDDNKEVRLATDIITSRVVNIRKGTVALDQNVSMNGTINAVESTLDL  
GEHSLTIENGEALTFTGENTLKIKVIEVKDITVSGSIRGTGEVVLADANTKLHFVPVDES  
KSRPSNGAERKFTLIENVQLANFDLKDITTAIPGALVYGKELDGTTLYGSQKDNAKGY  
LQDLVKDNSSVGIPEGMLARIEKHTAAPEGTAGYDVSGVMLDIAEHFVSDSAAAAARVTE  
LDNRQNTTAAATAEVIQGASSAATSSVAGRVSSIARAPGASVQRNVAYANGEGVAAGDDH  
ARFGAWFSPFYNQTTQKHVKGSAGYKSKITGLSLGFDKANDDLSVGVALTGSTATVNHK  
DKKSGDKTTVKSLMFSVYGMQQJTDNWTYTTGVATFGTNSVKNSEKRVISATSYDTARGKF  
TSMSFSGEMMFGYNHVIDDITPTFGLRYGRVNSTGYKETGSSQNLEVSMKATNSFEAI  
AGVKVAAGSYEMNGAMLMPEIHASINHDFAAKTKKADAKLGGSGELGYAGKQAIKTTYEV

GFGVNAEYGMMEYGFYDAQFAKKRIGHQGTMKVRVNF

>gene\_446|GeneMark.hmm|641\_aa|+|5650|7575 >NVVL0100009.1 Rickettsiales  
bacterium isolate NORP64 Contig\_source1382A\_3623, whole genome shotgun sequence  
MLQAFRCRLVVYFSLIGFMTNIFGIIKTFKAKTSPWVSMIFSKPLLPAAQAFGIGVCIIL  
INLLFSPSVSFASKRDALRIEIKIEKDRVKAPISELTKNLEKIAKIYKTSNQKSYWESE  
GKGALHKFLRSRGYYSATVNSEISGKNTNSITFHIEPNERYSLSNIGIKFTTGSNLNIKI  
PAIADLKLKKGTPAIAEDIFSTQKEILEYVEEHNCLLSVSHQAVINHFDRKLELVFFI  
DAGSSAKIGEVSFQGLDKIHPDYARKLTKLKSQCFKTSLIKAARGRLQKSGLFASTKPT  
IPKTTNKDGSVPVIFNIVERKSRSVLGGLSYGTDLGFGATLGWEHRNFLGQGELVRANLF  
GNEREQILELNYVKPFFKRDDQTLRLGLRLENKKSKA FEHKEGAVSAFLERKLESEYWIGG  
FGARFSHARVQKSDNSKEKLSLLSLPFFIKDTRDNILNSTRGYEVRLEGAPYFGVSSK  
QKPFKTTISGAAYVKPSDSRLVTAFRGSIGSILGVRASVPIAEKFYVGGGGSVRGYEH  
QMAGDLDSKRPLGGRSFVEGSLELRFHFAEKMGLVAFFDGGRAYSAASPDFGKKLLYGA  
GVGFRYYTEFAPIRVDIAFPIKKRQGVDKSYQIYFGLGQSF

>gene\_447|GeneMark.hmm|1172\_aa|+|7575|11093 >NVVL0100009.1 Rickettsiales  
bacterium isolate NORP64 Contig\_source1382A\_3623, whole genome shotgun sequence  
MKNFWRILGGMIIILLVLLAVSASVWLKTNGAREKVQQLVVEAIKEQTGFRASIEGMNLSF  
PLIADIERVSLSKGEEILRIKGFHINILPSLFLWEISVWSVSAKELHFLKKGAGGFV  
PEEKSGDIGGASEKLGQSGTGFFAPDIMVRKVEAENIILAPQFTGIEKEVVLSLGGSL  
SFDMGAKELEFVASSVTLLAGEALDENLVTIIGSYNVGAGDVRIKLEVVSGYIDARGE  
FELRVREERVLGEMKYSTSRLGGVLSEYIEGTKSAISGIVKISGSPDNARVSAQGNVLID  
FGENEYVRLSEIDWKSEMLFSKGAMDGSLTMNQGAVHVNGGIAYKDNKFYVKNMKAVAPG  
AEEVINLVFNFENSILTGDVRSED RYLLES AKYFPFLKSGSLALKTVFYDNNNRQGASVK  
GQIKQLSTKFGDCGLINLDLNSSDLWNGQIADSNVSLKFLEVGTLMVQSLKLRASSGGQG  
GVLASSSGGNHIRLSGEIGCEHGCFVDLKFASRV SAPAGAGWSVAIDEISGMVGD AQVKN  
SGVILLGGGKSAFEINDLIGRGTFNASGKISDRGKASAGGVSGLVMSDVP MNALSEI  
LPEGYQDAKANGRIELSGGDAPVLKGRINIDGLLLPGLKDAKPGKGVGLRIVANLTS D  
RTILSGRVLRL EEGSSSGGSKILSSKTFSSKAPSSKFLSSKAPSAGEE IARLKIDLPAK  
FTMVPFEYSIDDKKNFNASLFSKNFDIMALVPAYPGHEMEGDINADIVATGTL SNPSFKG  
GAELLRGEYRQRHG VVWLG VSGKLA FN GGQVLV GKMSARDESGNMIAASGELSLMGAHK  
FKVEINTEKIKLISNAYLHGEMSGRLVLSGDKEQASAVGEFSLDSMEIKIPEHFTQHISE  
INIIEPETEIDAIRAKVQGERGKGRGVEPEKD DSYK LKLDIKVKADKRLYIRGWVDALL  
RGGLHITGFAHDPAAYGRVRVVRGKYQEF GKILD IKN GELTFDGSIPPSPYLNIVGISEI  
GSHEIRLRLSGSILNPDISIESTPAMSGEEALSMLLFGEKAENISTFQALQLADSLRRLA  
GHGGGFDPLGLGRKILGVDDISFKTDANDPKKTSVGVGKYLTD R VYFEIEKGRQESGTRT  
KIEVQISPKISIKSVQEEEGNNSVGVNWRFDY

>gene\_448|GeneMark.hmm|61\_aa|+|11174|11359 >NVVL0100009.1 Rickettsiales  
bacterium isolate NORP64 Contig\_source1382A\_3623, whole genome shotgun sequence  
MYNDKIRQNKYFYIKILWYYTEKKVPAERKEELIKIILDELDPNAGEEVVKSVA DIYYRR  
R

>gene\_449|GeneMark.hmm|57\_aa|+|11331|11504 >NVVL0100009.1 Rickettsiales  
bacterium isolate NORP64 Contig\_source1382A\_3623, whole genome shotgun sequence  
LQIFIIIEEGREEAVIKRNTQIVTNMLEQHFDLKHIA SVTGLSASEIEELQNSAHNSH



>gene\_450|GeneMark.hmm|74\_aa|-|11799|12023 >NVVL01000009.1 Rickettsiales  
bacterium isolate NORP64 Contig\_source1382A\_3623, whole genome shotgun sequence  
MILKERNVLLGAIYKNNNVNKERKEIQNVLRKIKSQTRLCTFMDHFVKDIIAELVITSV  
FLCAGEKCRAILMT

>gene\_451|GeneMark.hmm|90\_aa|+|12380|12652 >NVVL01000009.1 Rickettsiales  
bacterium isolate NORP64 Contig\_source1382A\_3623, whole genome shotgun sequence  
VCGHQARLATLDLNLELELDKLGHCYHESELGFDCVLTSCFDYLSVFLIYVYLKYKITN  
IFNKACEYYSHLHIFFSIKTKLTPSFSIFK

>gene\_452|GeneMark.hmm|472\_aa|+|12658|14076 >NVVL01000009.1 Rickettsiales  
bacterium isolate NORP64 Contig\_source1382A\_3623, whole genome shotgun sequence  
MTTQTQTQTTPATQRKEINKRPSRPVRKTPGRKPVRRDVEEDTPTVPDNGVKVALKE  
LKQKSPEDLQVQAESLGIENVSSLLKQELIFAILKKIVEQGGQISADGVLEVLPDGFGL  
RSPDANYAGSDDIYVSPNQIRRFGLKKGDTVEGQIRAPKSGERYFALLKVHKVNFEDND  
HAYHRVHFDNLTPLYPEEKLSLEMQKGFHDFSTRTIEIVAPMGKGQRALIVAPPRVGKTV  
LLQNIHAHAITNPEVYVIVLLIDERPEEVTDMKRSVNCEVVSSTFDEPATRHVQLAEMV  
IEKAKRLVEHKKDVILLDSLRLARAYNTVVPSSGKVLTTGGVDANALQRPKRFFGAARN  
IENGGSLTIATALIDTGSRMDEVIFEEFKGTGNSEIVLDRKVADKRIYPAMDLTSGTR  
KEELLVDRATLSKMWVLRRIINPMGTIDSMEFFLSKFKETKDNAEFFSSMNS

>gene\_453|GeneMark.hmm|318\_aa|+|14108|15064 >NVVL01000009.1 Rickettsiales  
bacterium isolate NORP64 Contig\_source1382A\_3623, whole genome shotgun sequence  
MQKRPKIALIGGGNIGGTLAHLVAKDALGDVVLFDLTEGKAKGKALDIAQGATIENSVDN  
MEGTNRYEDIAGSDVVIVTAGIPRKPMSRDDLVAATNANVMKTVGAGIKQYAPDAFVIVI  
TNPLDAMVYVLQKASGLPAKKVGMAGVLDSARFNCFLAEFEKVSVENVNSFVLGGHGDS  
MVPLVRYSTISGIPVPMIKMGWSTQARIDAIVKRTRGGGGEIVSLETGSAFYAPATSA  
IEMAksyLDKRKIMPCAAYLNGEYGESDIYVGVVIGKNGVEKIVEIELNSDEKAEFK  
KSV DGVKELVGSIQMSLA

>gene\_454|GeneMark.hmm|372\_aa|+|15392|16510 >NVVL01000009.1 Rickettsiales  
bacterium isolate NORP64 Contig\_source1382A\_3623, whole genome shotgun sequence  
MSSPDVLSFWTTSIKNTISMIKSNFTVRSVLALLTIILCNDSNAKSSCDNIAIELEK  
LSNQGDIVSQNNLASCYYVGEVSKDITKAIKWYRKAADQGNVYAQRRLGSLYIMGAGVS  
KDITKAIKWYRKAADQGFASQDTLGVQYSSGSGVTKDLTKAVSWYRKAADQGYAAAQNT  
LGTLYFNQEGVTKDFTQAVLWYRRAADQGHVPSQAILGVLYANGLGVTKDFTKAVSWYR  
AADRGHAFANSLGDLYIKGKGVAKDFTKAVLWYRKAADQWDAAGQNNLGNLYAKGEGVA  
KDLAKAVLLYRKAADQGYAAGQNNLGNLYAKGEGVAKDLTKAAKWFRKAADQGSVLAQNN  
LRTCLKALSERH

>gene\_455|GeneMark.hmm|716\_aa|-|16697|18847 >NVVL01000009.1 Rickettsiales  
bacterium isolate NORP64 Contig\_source1382A\_3623, whole genome shotgun sequence  
MKEKPNLQENTITQPQPSQPKTQGTPIPKKVDHEFELHGTKISDEYAWLRADGWDPKI  
TDKEVLSYLEENEYFNNFITPLSAQKEEFFEELKGRIKLEDQSTYTKKDDYYYYSRTEA  
DQDYTIYCRKHGSIDAPEEILLDVNELAKGKDFALGSFSISPDKLMAYSVDFTGGERY  
DIRVYDLEAKTFLSDQIENTIGSVVWHERLSGFFYSPTDEKWRRDKVKYHALGTNSDEDK

IILHEPDPLYNVSASKSSSREYILINVSGHDSNEISYIKMDDDSLTPKMLKAREEQILHS  
VDHNADYFYLSTNKGAKNFHILRAKSAKXSENSDWDVYIAERKDAYLSSFDITQNYLMMN  
YLMMNYRANALPEIVIRELRSGVEKTIGFPDSAYTAGAYSTNFKEDDIRIGYSSLSRPSS  
VYNYVFASEQHLHLLKTQEIPSGFTPEEYEVERIFAHTDGVQVPVTLFYKKSFLKKGDSNP  
LYLYGYSYGISVPPSFRNSAISLVNRGFVYIAHIRGGDDRGHDWYEAFLTKKRTFS  
DFIASAETLIEEGYTSKGNIVIAGGSAGGMLIGNVVNRPELFKAAIAHVPFVDVLTML  
DEDLPLTPGEYKEWGNPKDKEYFDYIKSYSPYDNVLAQSYPHIFITSGLSDPRVGYWEGA  
KWAARLRDRKVGNSLVFSKTNMSFGHSGASGRFDYLKEAADDLVFILEMFKRPQGM

>gene\_456|GeneMark.hmm|149\_aa|-|18915|19364 >NVVL0100009.1 Rickettsiales  
bacterium isolate NORP64 Contig\_source1382A\_3623, whole genome shotgun sequence  
MKCPFCQSANISVKDSRETDNGRTIRRRRHCLSKGRFTTFERIQRKLFVVKRSGTKRP  
FDSSKILNSITTALRKRNFSDQIDELTNKITLKIESSINKEIPSRTIGKLIMQELAKID  
QVAYIRFASVYKDFATAQDFAKFISKIKK

>gene\_457|GeneMark.hmm|419\_aa|-|19361|20620 >NVVL0100009.1 Rickettsiales  
bacterium isolate NORP64 Contig\_source1382A\_3623, whole genome shotgun sequence  
MTNQELSSTDPEIFAAIESERKRQETYIELIASENFVSKAVLEAQQSILTNKYAEGYPSK  
RYYCGCDEVKVEEIARDRLKQLFNCSYANVQPHSGSQANQAVYLALLNPGDITLGMSLD  
CGGHLTHGAAPNISGKWFNPVFNVDPEHLIDYDEVERMALEHKPKLIAGYSCYSRGL  
DYARFREIADKVGAYLMADIAHIAGIIAAGEHPSPPHAAHVATSTTHKTLRGSRGGLIMS  
DEEEIGKLMNKAVFPLQGGPLMHIIAAKAVCFKEALNDDFKIYIKQVIANAKILASTLQ  
ERGYPVLTGGTDNHIVVLDLRKHGLTGKLASASLDRAGMTSNKNTVPFDDTSPFVTSQVGR  
LGSAACTTRGFREEFRIVGNMIADLLDSLKESEENAATEQAIFAKAVELNSKFPVQAI

>gene\_458|GeneMark.hmm|140\_aa|-|20617|21039 >NVVL0100009.1 Rickettsiales  
bacterium isolate NORP64 Contig\_source1382A\_3623, whole genome shotgun sequence  
MMKCFIKIISFKISWILIMTAFVLWYIPNNYAEIKYSILDDVAYDDSNFLRHVYVKNMD  
IKCQDKTYKFRGDHFDEMVRKNNPSIAEYKTVQFDTGYLNRQNKLFVRMLNSFKCSA  
DNQYQSSYELYSPDKEQEKK

>gene\_459|GeneMark.hmm|215\_aa|-|21040|21687 >NVVL0100009.1 Rickettsiales  
bacterium isolate NORP64 Contig\_source1382A\_3623, whole genome shotgun sequence  
MTTDIKKPCECEPIAALS GKAKKLMVMLHGVGSDGNDLISLVPFLQDHLDPDYHFIAPDGI  
EAYDMAPFGRQWFLQDRDPQVIGGLVSENAPKAYQIIAKKQQELGLSNADTTLFGFSQG  
TMLGVYMTLMQEAPFAAMLAFSGRLITPMLLQNTQTPICIVHGEQDDVPAQESDNMAKY  
CSENNIEHRQIMVPNLGHSIDASGIEFALNFKGE

>gene\_460|GeneMark.hmm|212\_aa|-|21688|22326 >NVVL0100009.1 Rickettsiales  
bacterium isolate NORP64 Contig\_source1382A\_3623, whole genome shotgun sequence  
MQMNSKTIDKIFQSFYNATQKPQTELNYSNNFTLAIIVLLSAQATDVSVNKATKDLFAKY  
DTPEGILSLGEDGLKPYIKTIGLYNSKAKNVIALCRILIDNYNSEIPSEFDQLIKLPGIG  
RKTANVVLSCAFGKVTVIAVDTHVYRVSRRLLGLSSGTVNGKVEEDLLANVPTKWQKHAHHW  
LILHGRYICKARKPLCSECKITEYCEYYKELK

>gene\_461|GeneMark.hmm|128\_aa|+|22547|22933 >NVVL0100009.1 Rickettsiales  
bacterium isolate NORP64 Contig\_source1382A\_3623, whole genome shotgun sequence

MSGEEIFDLIKKQISDDNVVLYMKGTADFPQCGFSAMVAGILQTLGIKFKDINILSDENL  
RQGVKDFSDWPTIPQLYINKEFVGGCDIVREMYENGELSDLLKKSQNKGAQQLDEETESS  
AGAVTEKG

>gene\_462|GeneMark.hmm|306\_aa|+|22974|23894 >NVVL01000009.1 Rickettsiales  
bacterium isolate NORP64 Contig\_source1382A\_3623, whole genome shotgun sequence  
MSESAISRNLVKSVDQNVTKAVDDDLTIPKGSIFGLLSNGAGKSTLINILAGTVVKN  
SGVVKVMGVLDDELPPKVSSLIGVVPQEIVFDSFFPIYQALEFTAGYYGIRPNFRKTEEI  
LRALSLWDKRDVMPQKLSGGMKRRFLIAKAMVHSPEVLILDEPTAGVDIELRTQLWNYIK  
ELNKNVGTIIITHTYLAEAEQELCDEIAFIDKKGKIVKQDSKQNLLEDLSDRHVDVEFSENV  
TLKELSLLSKIKPEMILNNKFRFHLTSYENNYSKLLESSLGKEIKDLEVSQPDLEDVF  
HQIVGR

>gene\_463|GeneMark.hmm|295\_aa|+|23968|24855 >NVVL01000009.1 Rickettsiales  
bacterium isolate NORP64 Contig\_source1382A\_3623, whole genome shotgun sequence  
MIEILTNRVAVLHVRGGDAGKFLQALVSNVVGKIYSYNYFLTNQGRYLFDFVYKEDTSS  
YFIDLHEKDLVGLIKKLTLYKLRSDVEIQDRSGEYKILYSNDKLTSAETDAETGVELES  
NAKLETGAKFSLQDPRFDEMGRSLIQIENINYPPEKYGAIYNSDKYHCAIADGRPDLIY  
DRSIPIEYGAEELLGIDYRKGCYIGQEVISRAKYQGVRKKIFKLSFDKELSGDFCGTDV  
TDLEGKKGIVCSGYKNQVIALREENYLGLAEKLSIVNGETAEILIPPWRTKAI

>gene\_464|GeneMark.hmm|428\_aa|+|24834|26120 >NVVL01000009.1 Rickettsiales  
bacterium isolate NORP64 Contig\_source1382A\_3623, whole genome shotgun sequence  
MENQSNMRLLIIGDLNSEIKIAIDIAKSKNAKVMVMVGSCDEGIDFMCMGKGADLVLSVQ  
FDIKSLTKAMKNEKISTPVVAYGVQCSPKEAVLAIKSGAKEFLPLPPDERLIAAIFAALS  
DDSVQIIAESKPMMDAMSVADKIAASDANVLITGQSGTGKEVFSSYIHSKSKRKDKAFVP  
VNCAAI PENLLESELFGEKGAFTGALSRRIGKFESSGGTLLLDEISEMDVRLQAKLLR  
AIQEKEIDRVGGAKPIKVDLRVIATSNRDLKKEIAAGRFRFDLYFRLNVINIELPSLKER  
EGDIKLLSDYFIEKHVKNNGLAPKTISKEAIEKMLTYSWPGNVRELENVLHRAVLMSASS  
QIKPDDIQIEERADAGNLESGSGMPSMEKQMVFNLTLYCLGNMSKAANILGVSIDILKE  
KLEHYTKE

>gene\_465|GeneMark.hmm|280\_aa|-|26312|27154 >NVVL01000009.1 Rickettsiales  
bacterium isolate NORP64 Contig\_source1382A\_3623, whole genome shotgun sequence  
MVTHAKDKENSISVNFVWVGRGSRSCCGADFMFEGGSTSCISLEHKGTHYIFDAGSGIVSL  
GKKFKSMKKAHLFLSHAHYDHVNGMSFFDPLWNPNTLDIYAGVLAPYGGTEAFFKKYLF  
SHPLFPVKPSDIRAHLTYHNFTPPASLTLEDAELKTIYLNHPGKASGYALYIGGRKFCYI  
LDTETSGESFIDAICDFVKDADICVYDSTFIDAEKEEYKGGHSTWQDAVSIAARANVTR  
LFLTHHAPFRTDQELRHIENEARKIFPNTHAAREGEQVLL

>gene\_466|GeneMark.hmm|355\_aa|-|27160|28227 >NVVL01000009.1 Rickettsiales  
bacterium isolate NORP64 Contig\_source1382A\_3623, whole genome shotgun sequence  
MYTLDKYKDQLSILVDDNEDNLFLLTRRLKKEGYTNYITVNNGKDALARTKDSKIDLVL  
LDLLMPDINGDEVKQIKSDKATNAIMVLMISGDDRTENIAECIRLGAEDFLQKPFNVDI  
LKARIGGCLRKKYAEQEKDYLEKIEFEKQQSVQLLEATFPGKIIIEELTKNGKVAPLLYK  
NTAVIFTDISGFTNYCSKHSPKEVFDNMQAYVNLCEKLSKHEKLEKIKTIGDAFMATGGM  
FVKTANPVLASAAAFALDLLKERKSLPTLWDIHIHIGIDYGDVIAGIIGHSKYLFVWVWGDVTVN

VAARIQDVAKANSVCISKNGWEKIKNKSTGKSIGKFDLKGKGGEMELYEVTAIKTG

>gene\_467|GeneMark.hmm|121\_aa|-|28241|28606 >NVVL01000009.1 Rickettsiales  
bacterium isolate NORP64 Contig\_source1382A\_3623, whole genome shotgun sequence  
MIKILYVEDNEDNVYMLRMRLEKSGYEVIIAENGLIGVEKTRSEKPDVIMDVGLPVMVDG  
HEAIKILKADEATKSIPIIILTAHALSTDVKKAKDVGADGFETKPLNAASLIEKIEKLT  
K

>gene\_468|GeneMark.hmm|111\_aa|+|28668|29003 >NVVL01000009.1 Rickettsiales  
bacterium isolate NORP64 Contig\_source1382A\_3623, whole genome shotgun sequence  
VYLFVKIEGVSIDDYVTSEAQIGNMRWDDFRINFFLSNIARHAILVRTSFHRGIMSARAI  
LSSKGQIVTQEPIGRNLSDFFGK GKALIQETEPQKENVDDLIAQAVMKNDR

>gene\_469|GeneMark.hmm|322\_aa|-|29095|30063 >NVVL01000009.1 Rickettsiales  
bacterium isolate NORP64 Contig\_source1382A\_3623, whole genome shotgun sequence  
MFEKPLISFDYAIKFLKNKEGYEIEGFISALFAAENYKPKITALLESSESNKERADFK  
RSIADLVVEDTDGNKYIVEIERSFTTNFMHKACFNSSRLIADNLSVSQDYTNIKKIFHIS  
LLYFETEEMQKPIYHGKTVIHEVDTAHPIDLVRVMNQGMVTFENHNVPPEYFFISIPRFNx  
xINQEIDEWLYVMKNAEVKKDFKSPYMAKxxERLSVLKMDDEERNQYYKYLKESVNKEDT  
LTAALEKGIKGMKQGREGREEGMEKGLEKGMKGLEKGMKLEKVAIAMLSRNKPLD  
EISEFTGLSSQQLLTLQRSLNI

>gene\_470|GeneMark.hmm|190\_aa|-|2|571 >NVVL01000010.1 Rickettsiales  
bacterium isolate NORP64 Contig\_source1382A\_7217, whole genome shotgun sequence  
MLGSTIYDSYTQSTHSCIDLHKNFDQGNPLYEYEEGKGPYMRYTSTPNQRNIIKDLDNID  
IPDDIKELANNMYKEINPPTKRNISRSYMLVYFIICAYDKLNRVYDPKFLCKKMGINVKS  
LNKALKLDTKYKMGNFCDRSCIDYIPMYELMGLSGKLLVAKDIATQIHKDDKIRRF  
PQNVAKGIY

>gene\_471|GeneMark.hmm|444\_aa|+|663|1997 >NVVL01000010.1 Rickettsiales  
bacterium isolate NORP64 Contig\_source1382A\_7217, whole genome shotgun sequence  
MSKKYLFSTLEVRKGLCASQENRKINKNKSLVIRLLNKDLSFILIKKIFIGGRVKIKRC  
GAIHSYIIKGEYIYLPYNYAKRIVGLEVYNKKYINIELSMNVKLRPKQIEARDTAMVYLK  
KTGSVTLALYTGFGKSIVSLNLAIALGVPIIICIGNILSNGWLNLLNKYTDARSWLVGS  
ELTESVNIIVCPMSKMHMLSEEYLSNFGTVIIDEVHEMCTKIRIHKLLNLTPRYIIACSA  
TPDKDDGSDIMYKICGDHRVTVKDNRPITIKFNTGMHPDNLKWEDLLTYLYHSNKRN  
NLVLDIVNNNPKKKILITWRVSHVNILYDLSINGKSVDFLHSSKTEYNDSDVLVGTVS  
KIGTGFDEENICNFKGKRLNMVIFLSTSKSKNLITQAIGRVRADNPSVVFCDNSKII  
RRHWTLRKRKVPNASYEHVKIFDQ

>gene\_472|GeneMark.hmm|437\_aa|-|2071|3384 >NVVL01000010.1 Rickettsiales  
bacterium isolate NORP64 Contig\_source1382A\_7217, whole genome shotgun sequence  
MTPGNVSNLESDGWSSFQRLHTIESKGETIPSKFSHQATKISWSTPVVREVASRNTRSG  
STYEADMNCDFLSNYSMTLDPQITVGDYLESVQVCWTPNIFHNIIESGGLYMNGYKYQ  
NVDKYWLDIHSQLITSSSESKRNAYMKNIGNKAALCDWSCNIEGDELFLFIPWFFTENS  
LSPLLLIIKDSVKFEFKFNLNFFSLIRMRIKGENGNWECIKYDSKYLKGINDKQRIPSPQ

MFAKYLMILESERKWRLSESSHKIYARDMVRVSSMVVREGGDRVDININCSNPITHIYWT  
AENMEQNKLNLSNYTTSGDESGKNPIHKRSMYSGLERDEELSGGHFEYADPYMSLAQL  
PKSSGYNSSSYSDTTKINADTGISTSGKNSTMALWIKSETDQQKYRVNCYLEHMIEITY  
SKKDKCSISSSQVRAYK

>gene\_473|GeneMark.hmm|483\_aa|+|3606|5057 >NVVL01000010.1 Rickettsiales  
bacterium isolate NORP64 Contig\_source1382A\_7217, whole genome shotgun sequence  
VKYSKTPPEFAKRVNKEKRDVTLLSIQKILINKGSVEITIDLRDGSEYKGFNDKTFM  
MLRKNHRESLDGFKDMFKRNRVKKKYSLNNGFKAPMYLNSDITEFLVQGNKGLFGYAY  
LDTSVGLLSETIVVQDDGDDEGNSSPSDRNSILSSAIFTSIMAAAYLTNLSRSTTNK  
GLTRGDKGYKGNHYGADVHMNNHFRKIFKATNEKVNATYNEILSEYKSLAVGEGVDKRVK  
YLRSIGGDFAVGELKRHGYTGKFEFVTSKRKFDENDFQFSRIQTFTSVGKLSRDDVKGK  
LGDVRFMYPKDLRSILDSISPEINNYIKQVKDSNKRNDDSYMTQVNHGYVPASEK  
YDAEKMMDILDAAVKRLTYIKKPSDGSNPKNWDKEEMLYQSVSMRLLTEIAQLVISRTLE  
VMRIMKVLGLSMEQIKDIVSGGRVIQSVGLSGTRGTVSTRKVRKGGKVRQPKKPRPRK  
RNK

>gene\_474|GeneMark.hmm|139\_aa|+|5116|5535 >NVVL01000010.1 Rickettsiales  
bacterium isolate NORP64 Contig\_source1382A\_7217, whole genome shotgun sequence  
MNVSKLGIVNLVLIIVFVVTSSSMFLSHKNSVQNYGIAFKIQEGVTTGTTDSMVTGG  
NNMYIANSTDPLTLTGNNDHLEGRVGIKNNTDNNVTLKGQINGITLDDGGLTLIVEK  
YKTAMFISKDRKGTYLRTQ

>gene\_475|GeneMark.hmm|316\_aa|+|5611|6561 >NVVL01000010.1 Rickettsiales  
bacterium isolate NORP64 Contig\_source1382A\_7217, whole genome shotgun sequence  
MSSIINNKFGKDVNVKFTSVSNGLLVSIIKIDNVRGEIVLSDEDEYFLGEILKNVLSK  
NKHSHLLISPNTHIKYGNSYIPSEYIHSALSKITLSKVYDSYTEEGMYISLKHINNMIDV  
SSIIKLFNDVVSKIKTLYKNNILFDIQNKIAEMWGFVKLPNNLTQVNLDERIYNRVELA  
KNIKSGEDVILDVEVGSNAVRHEISRNIKFNFVFFGDILRIYIHM RKDISNVLNEISKI  
NNDTHGRIMIIKETLFDNAKDKYDIAKSLVDNVEYKLSNEYIISISLPKCLGNVDGRDI  
LREINKKYAMKRISHL

>gene\_476|GeneMark.hmm|491\_aa|+|6563|8038 >NVVL01000010.1 Rickettsiales  
bacterium isolate NORP64 Contig\_source1382A\_7217, whole genome shotgun sequence  
MKGIFIEGEIGEEYTKSKYLYKGIVELTLNDKYKGALMSERIIQISTSYIGHIEDIESI  
KEIIINMCSKLLHSDVEEVTTTKTYSKNGIMTTFYPICKGRPLYSLDYSRFRVNCNIKEF  
MGYTYIGNANEMRYIMDNLQDKYRELITESYLLGYCKPYIKEICGLGLGRSDPPYQINT  
IKNKIQLLRENRIVVMPRMTTDNNIKLYPEIAKAFGIEIVSDALTVPIAFKFERFKEIT  
LQSWLQESAIQIVNNNIPIYTIDFMTLPKFSHLSKSHTSKVRSSIESTSNIPSIVVGEVT  
NIYKEILPIEFIKDFSIKTDAITGRFSSIKQINRFVDALHSFVDGTEIAIGKNTKRFDYR  
NVKPVNSNVYIEERDL DVEIKSIYDLTGTVLVSVHVKIHVDDYFGNEYVEFHLDIPMIR  
SDQSFSDLFTLVTELWETGMFLSTWCKFNII RTGEMSRYPVYIFFDSVTLDSLVEHETA  
RTECDGNTKLI

>gene\_477|GeneMark.hmm|231\_aa|-|8360|9055 >NVVL01000010.1 Rickettsiales  
bacterium isolate NORP64 Contig\_source1382A\_7217, whole genome shotgun sequence  
MDGGIYLSIFVTFILFALILLYFHTTNI STSRTLCPVKGCKTNILSGVKQCPDSKARILV

TPSTEV CNSPSTCESNKTPFALKKDGSTNADGVCDEGDVCRCLQKPRCANHITSYFTA EK  
GTPSLGILPQRIVFNQVYSYTDISGKYNIKRPLEYINTLTDFCTIPNSWVSDDRIWPNNC  
VLGTLVSIPDEPDTFNKSKISITPMGCVIGNGDECPDKFPYWDKDKISCAS

>gene\_478|GeneMark.hmm|182\_aa|-|9080|9628 >NVVL01000010.1 Rickettsiales  
bacterium isolate NORP64 Contig\_source1382A\_7217, whole genome shotgun sequence  
MADIENQINVHIRNCGTDSGTHSFTSSDSFEDITENITEDIVEGLEDIIVDDVKEMIKAL  
RKKIFLCDIAKAKTYRISSNFLAILIILMASTLGAYESFQTEKNIPVITISFAIATLKVLH  
QYINTGNRGTFFYKVMHIKFRKMFTNATYALETLDNNDELLEFAKILRNDIDNLDLSLYGA  
PK

>gene\_479|GeneMark.hmm|245\_aa|+|9693|10430 >NVVL01000010.1 Rickettsiales  
bacterium isolate NORP64 Contig\_source1382A\_7217, whole genome shotgun sequence  
MESVIPLTAFSDKLSLCFDAGVYLNLDNMTLSKISLKYTNEVYKVTSNRSSTFLKYIALI  
KDNRCVFDLIKSNPNISNIFGFLWNDEKKNVNVMDRKSIVTKYCGRSMGDKCFCKMG  
ISYWDWNECLIPVSCGGSTTEENIRITCFRCHKASSTYVHLAEYMLHMKYDIPKSVPS  
VINLYKSIVSICESGEHKIDHLVKDKRISLIESAEFKTLLWDLNLDTRFITYNTLCEIFN  
RFRSD

>gene\_480|GeneMark.hmm|131\_aa|+|10993|11388 >NVVL01000010.1 Rickettsiales  
bacterium isolate NORP64 Contig\_source1382A\_7217, whole genome shotgun sequence  
MNHKNKLDPFSAKLLLDLELKAFFPGKTEELAADLLPGDSGGMRALMTMNPKLLAATL  
SLIISGYRVDEVSVGDGQMEIINYLYGKGSGEIANEKKGKTKTSLMRYARAIKHYSLSL  
LYEESDDSSS

>gene\_481|GeneMark.hmm|636\_aa|+|11473|13383 >NVVL01000010.1 Rickettsiales  
bacterium isolate NORP64 Contig\_source1382A\_7217, whole genome shotgun sequence  
MQDVFAFEYSGVNISLDPSEYSNSERPEVSSDNVIISPIGSEDDKKIVLELLPMVSVER  
ACNLQDCMRIGRSLHVCYDGSVEGLSKWVDFVSNDDILDEEDCNMEWRHMFDSKSMGLRN  
IGYYAELDSPLEYDEWNNIRFCKQLELALGLAHTDVARLVWLTCWTSYLCTRIDGNGWYY  
YDGNKWTMDKGVKLRKYVSNEFRSLLERKRTNLSRQLEGPGTSPKLGERALDNISALI  
CKLGITAYKTCVVKELAEFFYDEFMERLDTNMHYTGLSNGVIEICKGEAFIRIGMPGDY  
ISKSTNIRMPSDITYESGPVVECMTWFKKCFCDNELVRYFLRMSASLLMGGNQDKLIMFF  
LGAKGDNSKTTIKLFEKSGDYCATFNPNLFTKEMSNSGPSPELEKKGKTKVAFINEPS  
PDSPWGSSLIKTISGGDRYFARKNRDDGGYIESSFMLIILANMIPPMSPEDAVKNRLKSL  
PFDSTFVNDPPESEERWERRIFKGEKNFSRNFVLPAYFLWIIASMYTSYHKHGLKEPT  
QVIESTKQYWSNDIYEIYIRQCLHRVTIDDTDEIDTNIKLLVVDAYTKFTQWMTSYSSH  
IRVPSRSVFINEMKKKYRLGNPIRDEWVGFTIKCEI

>gene\_482|GeneMark.hmm|191\_aa|-|13425|14000 >NVVL01000010.1 Rickettsiales  
bacterium isolate NORP64 Contig\_source1382A\_7217, whole genome shotgun sequence  
LEFHLPFSFSAIYVLLPSNIFYMLNVYVDIINMEIARHKTSKVDEIYLISEKIEKPSGL  
GYLMGSGNLNSKGFILNAISSTSSTKRLTMVGDKYQIEPNIHISPTLVYQGDNDYSKMLS  
NSGDYLVVIRNNDKSGISNKIKNMSFGVWVLSYKDALRVASEVIRLGFILTEKKMATLDE  
MRSLDVDFITK

>gene\_483|GeneMark.hmm|290\_aa|+|13982|14854 >NVVL01000010.1 Rickettsiales  
bacterium isolate NORP64 Contig\_source1382A\_7217, whole genome shotgun sequence  
MGDEIPTNPKSPRDETIITIDGKDVDNRDGVDKIELIDPLFPNFEEVVDKIEFTEEVPELA  
VDKEVLDLAVKKIEFVDDTHELPKSLEDMSYEEKLDTKNELLVKIRILRKTYPEYDIPMC  
STKCVSEIKKIYDKWLRQAVVEKNAGDYKIYLVLFVWLVIELIGTKVLGLNFSGFTLNQFN  
LVNKYETLLELGEKSYSDISAEWSPEVRLIFLSMTNAIIFTIFKYISSSLGVETANAQ  
SAFNGLFTKTKSGKGETDVAGMIANFGSMFTGVSNTKTNTKPSRVPKYSG

>gene\_484|GeneMark.hmm|206\_aa|-|15339|15959 >NVVL01000010.1 Rickettsiales  
bacterium isolate NORP64 Contig\_source1382A\_7217, whole genome shotgun sequence  
MCELYWPHTERKKEDFMKSISHHIVIRIVSIDPGVVNFCFRIEDRYNNGNVVTLAYTNI  
DNNNDKFVYLSKFLDKYTNEYAKTNIFVIEKQLYFSVGAFSVMHHVLSYFIKETKNKSNY  
PLIYLANASIKWNGITDKPKNVKKWSIGKAIELLELRDWTSLRILDSAKKKDDLSDVV  
TQAEIVRKLGLNYHITRAKIHLCI

>gene\_485|GeneMark.hmm|135\_aa|-|15992|16399 >NVVL01000010.1 Rickettsiales  
bacterium isolate NORP64 Contig\_source1382A\_7217, whole genome shotgun sequence  
MYIVILLVYILYLFYLTNNGNVKLAKLSHLLNIIINKSKIYKYSYTLSESNVSSFVLNK  
KDIYVVLQRNGIMYDDNTIIGVLLHEYSHIVCSLENNGHTDLFNKIESVLITSANDLGV  
YDSTLGVD DDTYPCVK

>gene\_486|GeneMark.hmm|147\_aa|+|3|446 >NVVL01000011.1 Rickettsiales  
bacterium isolate NORP64 Contig\_source1382A\_8423, whole genome shotgun sequence  
NRSRVKENKAVLPTLSRVVINKVDAVSVPTIPSTERIESRSSHSQPQLTKETPKHRFPKW  
ISPTNQMNTRTRRRRENDLLKRKNVKVSFKPDVPIMRDMIRNAPTDQRKKNIVKRAPSPT  
VRVLSKRKNKLD SGLKVKPKPKYII

>gene\_487|GeneMark.hmm|82\_aa|+|454|702 >NVVL01000011.1 Rickettsiales  
bacterium isolate NORP64 Contig\_source1382A\_8423, whole genome shotgun sequence  
MERVQMHPE DRASFRNEKSRVAVRMCILQYKCSIACIIVFFLVIELLSFGGELLFVLKDE  
ETSNKIFKMFLFRNCSRKIEKD

>gene\_488|GeneMark.hmm|434\_aa|-|1514|2818 >NVVL01000011.1 Rickettsiales  
bacterium isolate NORP64 Contig\_source1382A\_8423, whole genome shotgun sequence  
MAQTKPLPIGEFEWLTDEEDREEEKWLEYEQEYGFIVEVDLDYDPDYLHGHHSFPLAVE  
RVKIDESMLSEYAADCHKLLRGGREKYSAEKLTATFNPRKKYVTHIFNLQTYLKLGMELT  
KVHRVLRFRQAPFLKPYIEFCTAKRAASTSKFQENLQKFFANAVFGKTIENVRSHSVCKF  
VRNKKSCGRYIASPRFKHFKIISENCAIVFLSQSQVKNKPIAVGFTILELAKEFMYSQY  
YNTIKPIFNNQCEVIMHDTDSLLMRVSTPQAE DNIEKIKHILDFSKYPKTHPKYNIINKN  
RLGFFKDEVAGNHTEVCALRSKVYSLQIDEGDTKVKTENRCKGIRKGYSKKIPFAAFKK  
CVLSITNHRTTQYNIMSRNHNVTTNKVNKLSFSSFCDKRSLAICGIHSYPYGSILIKKNY  
CYLCVRDNVIVKRL

>gene\_489|GeneMark.hmm|822\_aa|-|2882|5350 >NVVL01000011.1 Rickettsiales  
bacterium isolate NORP64 Contig\_source1382A\_8423, whole genome shotgun sequence  
MPLCDLCGIVFSRAYHLKRHTERVHKFGQRFVQCAICNAIFTKRETLQKHREQHIPTTLF

IRYQSAFKRKLASYRKIYPRMVKTYEKAWQLDHVSLNKLISFHLETDKFFKVYISTTIEF  
VKYELDDETPEDNIELHLTSNTYAVNNARSARTFLRNARRNIAERVDDMLTHGSNWRVDE  
VLYTDIHFAAFNPIAGSCGMLSINNLKQIKKFKPKDSKKGANQNDCFYEAIAYHFTKSKNY  
KVLQAFIRKHINRNVKTPIAVKDIDRFLRGNKQLNIAINVVYEEEDDEEIPIYTNSEVKD  
EDHTITLFLYNTEVDGVLVRHYTHVEDINRLLRRKYNNGRKSIGNALHCFNCLQPFFTRN  
ALSNHRELCLTNKTQRIELPQEDSVMQFEHHRKFKVPIIGFFDFESSLVAPEHSCDKCK  
VGISACKHKTVEHLQIPNTYSIVVDWTDTVIHTNTYSGEDCMEKFFDELLEPRLTA  
VVDEAKALHGELNMSKEDEVMFQSATACNICDKVFMHDEMRRHDHCHLTGVFLGAAHVAC  
NVNRVVPSTFVLMShnftGFDSHFVMSMTEDKRLNSLKALPYNTEKFRTLFNNYTFVD  
SIAFLPSSLEQLVRDLTTTECFNILDQVQLYPNDRSDLKKLFLRKNVFPYEFNTSLAKL  
RATKNIPAKEDFSSKLSNSVISDEDEYAHATKWEEFECENMDEYCKMYCLSDTALLAxVM  
LRFrNEVMQDHGLDCCHYISLPQLAFDCMLKMTGVKIGLISDPDMYLFIEANIRGGSSYV  
NQRYSKSGLQDGGEQEIGLPHAREEYIEHVYVDAINLYGEL

>gene\_490|GeneMark.hmm|441\_aa|+|5603|6928 >NVVL0100011.1 Rickettsiales  
bacterium isolate NORP64 Contig\_source1382A\_8423, whole genome shotgun sequence  
MEKGFGLLENETDETTGSLDFYAGVKYENSVVSGTIETFKPLSGTVAPFQFQMTDRGRG  
SYIDLARSRLYMELQVVTDKGKPVTTDLDSIVNDIGNALWSTVQFELADRACSELTQEE  
YNYHSLIQKLLSYSSTSVAGHLKASRFHVDTANNYDKVEQRQNEGYDQRKKFCEESNVFQ  
VIGPLCAGFCQMSRYLPASLRPQITLVRASSDDFVILHKGDAKLKIVVKAELLVPYITI  
SDTMQNRIESSLMKQPMIFPFTKTIKTKQIPTGNLSAEIENLFTGLLPTSIIVGMVRAD  
SRSGRSELNPFrfQPfnVGEVSLYANGVQYPRGAFTPSFDEKMYMKEYLALFDNTGIGSE  
DDTNLITTTQQFEDGMLTFAFDLSPDGCNLYHNHSPPLEGNIELKIKFKSALAQPITVFVF  
GNIQSALSVDKNNKTVVLTGI

>gene\_491|GeneMark.hmm|166\_aa|+|6933|7433 >NVVL0100011.1 Rickettsiales  
bacterium isolate NORP64 Contig\_source1382A\_8423, whole genome shotgun sequence  
MAWQEKIVRKAYPVISSEGLTNIFVENYLAHCHTFRGVFSADRIPNILALEKRFSIVVN  
LSNYGEIGSHFIAIIVFEDHVYIDVLGEECTNKHIKKYLDYLRKPIQSNIRKIQSNTSR  
CCGFFAIVYVMYFERPTVIEIVFHRGEQNLyrNDDLCIQYIIALRQ

>gene\_492|GeneMark.hmm|86\_aa|-|7527|7787 >NVVL0100011.1 Rickettsiales  
bacterium isolate NORP64 Contig\_source1382A\_8423, whole genome shotgun sequence  
VRDFSRAGPTLPRDKFFLGEKHSLOIGSVKFPKGRGYSFDAVVFTRDGGVDSEGRQKKPF  
SFNLPAKLILPLHRAVTEIVTQAGLI

>gene\_493|GeneMark.hmm|250\_aa|-|7883|8635 >NVVL0100011.1 Rickettsiales  
bacterium isolate NORP64 Contig\_source1382A\_8423, whole genome shotgun sequence  
LHCYIVENKPTAPTLPDASDIESCREGEDEYDSDPDFWQSGQNLDNVLAASEGEEEEV  
EEEEEEEEEEEEHDAVENVVTPrTSGGVGRRVALKPAIKRVRDQADREGDAAVKSP  
GANLLRRSVSVFQKGGDDHDKEREVACGAASEVGSPPKSSQIIASSAPPPPKPKRRVAG  
REGAGGSTDNGERHTGAGRSKLLKFGGLSIDSPNlGGVGGGDVEPSCSDNALDTPGG  
LKKQKIKGEY

>gene\_494|GeneMark.hmm|191\_aa|+|9258|9833 >NVVL0100011.1 Rickettsiales  
bacterium isolate NORP64 Contig\_source1382A\_8423, whole genome shotgun sequence  
MSGEPTLKNIKLHFYIDIISLEKKLSKVECSVVCNNFAVLRskfTYIVFYGVNFVNTTG



VKSFGEIEASISHFCNLIQADRVTIEKYTIDNITWSGVYRSQIDLINLKREVINSKEDIR  
VIYNPFKFGASFRYNKTLTREKSPTLILFTRGTYTIVGSKCIEDAMMIYANIKTFLRMI  
DREKSFAQTAG

>gene\_495|GeneMark.hmm|211\_aa|+|9836|10471 >NVVL0100011.1 Rickettsiales  
bacterium isolate NORP64 Contig\_source1382A\_8423, whole genome shotgun sequence  
LGPLLQADLYCTHQSMNRCQAQCDVMEFIKNVCDRSHICTRISEYAYEYLRLLKLLAAS  
FTMEETAFAIFESCNRHDSPRSSEEICQHSGVATSRLFLENLINTSNTSAKHFLER  
FCGNLDLDFTEVQIGRVLGNNLYALRRMQPNCLVAAVIYFHCIVNNVKNLKEICEACN  
VSTGNTRRIAGLIREPYYGEGFKSKMENDFV

>gene\_496|GeneMark.hmm|123\_aa|+|10528|10899 >NVVL0100011.1 Rickettsiales  
bacterium isolate NORP64 Contig\_source1382A\_8423, whole genome shotgun sequence  
MYIARGRYIQRGRGWGGVFKSIFRTIMPLVSKIGKSIAASPTAMRVANTAKQSIANSALS  
VAADAISGENVGESLERNWKRTRQDLGNSLAPPRAKKAKKKKKKTKFTARASKYRRDRD  
IFD

>gene\_497|GeneMark.hmm|363\_aa|+|10902|11993 >NVVL0100011.1 Rickettsiales  
bacterium isolate NORP64 Contig\_source1382A\_8423, whole genome shotgun sequence  
MSRKRVESNYVKLRHPTAFSGKSKLSQYYKNTAKESEIDNALSSNYSYSLHRQYKRPRQY  
NPFFIYKKRQQLQIDLLETSKLSASNDGVRYLLTAIDCFSRKAWIEPIINKEKNTVLAAL  
RRILEESGPFETAYVDHGSEFISNVMKRFFIAENIKVYTRSEIKAAIVERFNRTIQTLI  
YQYLTEYETLRYVDVLQDLLSYNDRAHRSIANLSPNQAELEENKNKVVNALNKHYTKAT  
RLRNAKKKRQFKVGMVRLKLGAKFVRGYHLQFTLELFKIEKIEHRMPIKTYVVRSMdT  
NEVIEGSSYPEELQLVTNGGIFKVEKVMKKRTRRGVREELVRWEGFGPDHDSWNKVSDVA  
RRF

>gene\_498|GeneMark.hmm|583\_aa|+|12000|13751 >NVVL0100011.1 Rickettsiales  
bacterium isolate NORP64 Contig\_source1382A\_8423, whole genome shotgun sequence  
MSSFYVILSSAYSTKEHPSNALSKFVNIFCHPLDLKENDWKVAVQSVSFDSVYFYSNHGVM  
KICADVALVPYLTNETIITVTVPFQNESLDIKTPTDLYNYLFPFVKQFNRESVKKLDLYI  
QQNNDVNSSSYQTFSTEDLAKAPYVLMTLEKNQIKIEGVYCYIKMWTVLARWMKLNVIHG  
YNGEYVVLILNRDSAYITKPASEYDKPKKPELISVKMSEVKHLSKKNQIISTHPFMDE  
HNPYGNYYFEVTRKEYHSLTHINIPQLSVELDENNKQLHLLPGQATHIKLKFMRMNSST  
FVLRGSSDNSTSIYPDNNAAAFKIQLPTYIDLKHQYEVALLSITHPQKLNYSVADEHNF  
WIELEYLYEGETIIRKFDASPCLDVDNKKDNKSFRRSLYKMLNDRITIEHRQKVRFTHV  
EEDSNTVLASSLDTTTRVSILLAHVLGKHNIHTLYDEIKTSKNRNNMGEGANIILGDSI  
VYSTGFDLFRLLPHCMMLLYASCINPVHYGGHQAQILKFIPLHLVNKTLELQHSYESTHLD  
YQTVNQNTLNQLQFELRTIDGKLVGFEGSQNTFINLIFRRIE

>gene\_499|GeneMark.hmm|107\_aa|+|3|326 >NVVL0100012.1 Rickettsiales  
bacterium isolate NORP64 Contig\_source1382A\_8430, whole genome shotgun sequence  
GVGNIYAAESLFMSKINPLTKANTLGAGAVSALVKSIRVLQKAIYAGGTTLKDFLGGDS  
KPGYFKQELQVYGRKGLPCYICKTPIESLKQAGRATFFCPCSQQNKD

>gene\_500|GeneMark.hmm|428\_aa|+|633|1919 >NVVL01000012.1 Rickettsiales  
bacterium isolate NORP64 Contig\_source1382A\_8430, whole genome shotgun sequence  
LKKALLIEEKARVNIIMSARSKVLLMLFLIIVLFLIINTKTICNEKYWEIARTKKQI  
ANIEICTKEGNVDAAILASQMYGKGDTIKRDHDKAIDIIQKFADSGNSAALIQIADLYSC  
YNKYRNFNKAEKWYKEAINNGDNYSEKAKIALAKFYLRKYFNTKDSKYIGLYIDHLKEIA  
NNGNIDAILLLAAEYKEGSYIGKDYYTSLNWLEKAAERNSIRAYRSIGNYYANGFFGEAN  
YKEAKHWFQKAAKSGDNVAASFLKSNPTPFGLEITKATITDFKRKFRKHKNKIDAPNFING  
GYTYLVSPKYIPLDDVKKEVVFVFDKNSILDSVLIVFDKRKYGEIQTHLKSXYAPIVKGA  
QNIFMHSLTEVRLNGYVFYSQLNTDGYNSKVCTLIYESRAFSIKLYERDRFLRKRQQDI  
KKQKMNLL

>gene\_501|GeneMark.hmm|90\_aa|-|2220|2492 >NVVL01000012.1 Rickettsiales  
bacterium isolate NORP64 Contig\_source1382A\_8430, whole genome shotgun sequence  
MDSFNVSALNSLQDILFALTQHNEELRNAAWQHLISWHNQYAVKLWFSFGDDTYERTVKM  
LDKLRKTNIPEPPYHAWNDLPNIMKTIQKKK

>gene\_502|GeneMark.hmm|126\_aa|+|2555|2935 >NVVL01000012.1 Rickettsiales  
bacterium isolate NORP64 Contig\_source1382A\_8430, whole genome shotgun sequence  
MGFAVCPLYIYQRFYPIFIMLSIISLSCGGQNYNKYYISTILAAIVLAAHYHTSIEWGIF  
EPSSLCKPLVYIDADFSVDFKMLYSQKIGTCSKPALVIFGLSMTEWNLLLNLVLLPIF  
IKYRRL

>gene\_503|GeneMark.hmm|83\_aa|+|3163|3414 >NVVL01000012.1 Rickettsiales  
bacterium isolate NORP64 Contig\_source1382A\_8430, whole genome shotgun sequence  
MHSITYTALRKSLSSVLDLENNHVAYQVTRKNHKNMIILTEEDYNSKQETLYLLSNPAN  
AARIRESIKQANNSEFVEVDLDD

>gene\_504|GeneMark.hmm|88\_aa|+|3407|3673 >NVVL01000012.1 Rickettsiales  
bacterium isolate NORP64 Contig\_source1382A\_8430, whole genome shotgun sequence  
MTRKIKWTVNAAEDLAYWKKYDLNKYNRIKLLVKNIQETPITGIGKPEALKHALAGLWSR  
RINQEHRLIYCITAKEIIINYCRFHYYK

>gene\_505|GeneMark.hmm|74\_aa|+|3859|4083 >NVVL01000012.1 Rickettsiales  
bacterium isolate NORP64 Contig\_source1382A\_8430, whole genome shotgun sequence  
MSLDKRGDYWMDKAVQIWLKKNYALTAEIARLEQQKGLTPDPTIDSWVEQVVDIQLENTVL  
AAEIARLEDCMPSN

>gene\_506|GeneMark.hmm|84\_aa|-|4236|4490 >NVVL01000012.1 Rickettsiales  
bacterium isolate NORP64 Contig\_source1382A\_8430, whole genome shotgun sequence  
MKKFTIYTTNVCPYCVRAKALFDRKGFAYDELNAEDAKIREEMLAKSGGMRTVPQIFLGH  
IHIGGCDELYALEKDGKLDGMVEG

>gene\_507|GeneMark.hmm|661\_aa|+|4728|6713 >NVVL01000012.1 Rickettsiales  
bacterium isolate NORP64 Contig\_source1382A\_8430, whole genome shotgun sequence  
MSSFKIKSKYKPNGDQPKAIASLIKGLEAKEKSQMLLGITGSGKFTMANVIEQTGRPAL  
IMVHNKTLAAQIYAEMKDLFPDNAVYFVSYDYQPEAYIARTDTFIEKDSSINEQIDM  
LRHSATRSLMERRDVIVVSSVSCIYGLGSPELYSQMTLLEAGKEYKRKDFLNQLIDLQY

DRNDIAFERGSFRVVGGNIDIFPSHYSTRAWNLSFFGDELEYIREFDPLTGEKFRKFDAA  
VLYASSHFVTPEAVIKKSIVEIEDELQERLAVMKDMGNSLEAHLNQRQTQYDMEMMLQATG  
SCKGIENYSRFFTGRKAGMPPPTLFEYLPPDALLFVDESHVMVPQIRAMYNGDRARKSSL  
VEHGFRLPSALDNRPLKFEWLDYRPQTIFVSATPAAFELEETQGEVVELIIRPTGLLDP  
ECIVRPASTQVEDLIGEIKSTIKRGFRILVTTTLTKMAEDLSAYLQELGHKVSYLHSEIH  
TLERVEIIRSLRLEIDILIGVNLLREGLDIPECALVAILDADKEGFLRSETSLVQTIGR  
AARNSEGRVLLYADKMTNSLNKALAETDRRRKIQREYNKANGIIPQTISSKIHSMELKK  
VEDIAGGTEEAKIILSDPAKLQKHIAKLRREMCQAADLEFEKAAKLRDQMEVLKQAAL  
M

>gene\_508|GeneMark.hmm|426\_aa|-|6845|8125 >NVVL0100012.1 Rickettsiales  
bacterium isolate NORP64 Contig\_source1382A\_8430, whole genome shotgun sequence  
MSVPSVNASSMDVSSAQASPAQASPAQVSSAQVSSAQVLPNSMPPISYIHWPFCLSLCP  
YCDFNSHISGSIDHEQWLTAYKAEIDYFAHKISGRKVRISFFGGGTPSLMKASVVEAIQ  
KIGDLAKITDDTEITLEANPTSJETQKFEFESAGVNRVSIQVQSLRQEGQLLGRKHS  
KEAMHAIESASKLFARYSFDLIYAIPDQTLLEWQDDLKAAMSLAGGHISLYQLTIEKGP  
FYKLFHDGKHLPSNDISSNMYEWTNEYLLENGYRRYEISNYAKQTHESIHNLCYWNYNE  
YIGIGAGAHSRHLHNDNMEIQAIMMTHAPAKWLSSVMKNGHGIQTSCNLSRSEVIDEMLLM  
GTRLETGILEDNFQVRTGMNFESVLNLKTVKHIEQDLVSLDNGRLKLTDRGLMLHNYLV  
PRMIKT

>gene\_509|GeneMark.hmm|260\_aa|-|8122|8904 >NVVL0100012.1 Rickettsiales  
bacterium isolate NORP64 Contig\_source1382A\_8430, whole genome shotgun sequence  
MKIITWNINSVRLRIKLEKLCIEQNPDIICLQETKTEDKTFPLEAIKALGYEHVVYSGE  
KSYNGVAIISKQPISKSFSLSLYNDHKRHICAQIGDIEVHNFYVPAGGDEPDIELNPKYK  
HKLEYIDLMMHWLASNKSXSKDIILVGDNLNAPHEHDVWSSRQLRNVISHTEPERTALLA  
LQDSLEFIDTGRYFVNMSEKLYSWWSYRNRDWTNSNRGRRLDHIWVTQPLKDNLKSINSF  
QEARSWEKPSDHAPFILDML

>gene\_510|GeneMark.hmm|94\_aa|-|8947|9231 >NVVL0100012.1 Rickettsiales  
bacterium isolate NORP64 Contig\_source1382A\_8430, whole genome shotgun sequence  
MRQIEYSSAFKKDYRRESKGGKHQKTIDAKFKYVISSLIEDKILAKEYRDHDLGDLWGYR  
ECHISPDLIIYRKTGKDFIRLARIGSHSKLFFK

>gene\_511|GeneMark.hmm|88\_aa|-|9218|9484 >NVVL0100012.1 Rickettsiales  
bacterium isolate NORP64 Contig\_source1382A\_8430, whole genome shotgun sequence  
MSVANTYVRARIDSVTKERATEALHAMGLSVSDAIRLLMLRIAQEHRLPFKVPNQATK  
EAIGELESNKGTKVSNIQTLMASLHETD

>gene\_512|GeneMark.hmm|464\_aa|-|9591|10985 >NVVL0100012.1 Rickettsiales  
bacterium isolate NORP64 Contig\_source1382A\_8430, whole genome shotgun sequence  
MMRFFKHMRAGLKLLCTLCKNQILTYPPDKLKLPRHLKVFGTICGIIFYPKGLFIRPKT  
YGERFSNCLYALGSIYIKFGQTLSTRPDLIGAEMAESLRYLQDRLPFFDSIVIERIETQ  
FGKKISELDFEFEEKPVAASIAQVHKARLKSSELVAVKILRPDIKKYNDIDFLEYCA  
ALITKMKVSSKRLKLTVEVIGIFRRSMFELDLRSEAAAASRIADNFTGDDSLCVPKIHWN  
LTTNDIITLEWIDGVSIDYKEAIIALGHDPKEIAAKIAVIFFNQAYRDGFFHADLHPGNI  
FVCKDGRVALVDFGIVGILPENDRLAIAEILFAFLNRDYALIAKVHHRIGYIPSDTNLEY

FAQSCRAIAEPIIGLAIKEVSIARLLSHLFKVTEDFGMETQPQLLLLQKTMVVVEGIGQS  
LDEDINMWQLAEPWIKKWAANKNITPEAKILRAVKKIINDLLDRA

>gene\_513|GeneMark.hmm|269\_aa|-|10995|11804 >NVVL01000012.1 Rickettsiales  
bacterium isolate NORP64 Contig\_source1382A\_8430, whole genome shotgun sequence  
VDEKDKKDEKTFDEKSLDGKNLDDKKSFGFEKVTSKQKRSLVDNIFSDVSAKYDLMNDLMS  
LGVHRLWKNEFCKMIPNLDSKIIDVAGGTGDISLRIKENAKNQNKDPHIVVCDINPDMLE  
VCRARAIDNNILTNFDILTCDAEKLPFPDNSFDYYTIAFGIRNMISIEKTLAEAYRVLKP  
TGKFLCLEFSKVQNDVVRPLYDFYSFKLIPSIGQSIANNKDAYKYLAESIRMFDPQEDFK  
TMIQSGFSDVNYKNLSFGIAAIHYGFKN

>gene\_514|GeneMark.hmm|265\_aa|+|11905|12702 >NVVL01000012.1 Rickettsiales  
bacterium isolate NORP64 Contig\_source1382A\_8430, whole genome shotgun sequence  
MSFKIVTWNVNSIKVRLPHLLEFIKEHDPDIICLQELKCQTENFPSEELSHLPYNLYVEG  
QKTYNGVAILSQIQADEVKTSFPNNPASEQARFIEIALNTPMGYGRVICLYAPNGGEVDS  
DKFSMKLKFYDAFTDYIEQIKSFEEKLYICADYNIAPFDIDVYSPQKLQDSTCCTTYVEKQ  
KLRTILNSDFVDSFRAKYPDKQEFWSWWDYRGGSEFNKGMRIDTISSSNAISDLVDCTI  
DYKTRGKHKPSDHAPVIAEYLSEAK

>gene\_515|GeneMark.hmm|224\_aa|+|12834|13508 >NVVL01000012.1 Rickettsiales  
bacterium isolate NORP64 Contig\_source1382A\_8430, whole genome shotgun sequence  
MNNKLLQFLCIIASFAQLFLCANTIADEGSTQKEPELGKVEEALGVKRGECKNPPCSTD  
IDSLIDRLMVEDVKKQESLEMLRRLKEKNKKNKFNLSLVEMNTAKIMVLNKITSKSRQETL  
KLREVAFFGNLSIELHRCVKNTDPLNGNSLMLLTILDNHLEDDNLSVFHGWVLSNPSIS  
TLEHAIYEIIPDCFMVEEKRPVDPEDDEEPLDLDRGKPLDNNNN

>gene\_516|GeneMark.hmm|207\_aa|+|13624|14247 >NVVL01000012.1 Rickettsiales  
bacterium isolate NORP64 Contig\_source1382A\_8430, whole genome shotgun sequence  
MHRLEEKRFHIDSIEENIKNQAVPIQSFESAAPLYSKVTLTSGTFLTDKSVYLYGRRSAS  
PEKDGYYLLTPFAADNGEVYFVSRGWAPQSVKDKMEAESYTRKTIEAMVMSGEKKNFFVP  
ENDQKNNIWFTLDLDMAKKLLRVSVADFVLMQINSQNLPGKAKPLATTYLNKVHNNHLEY  
AITWYSLAACLFVFMFIYGRKPEESST

>gene\_517|GeneMark.hmm|510\_aa|+|2|1534 >NVVL01000013.1 Rickettsiales  
bacterium isolate NORP64 Contig\_source1382A\_8708, whole genome shotgun sequence  
LLEKCVNIVESQYGKNSSERARILHLFGLIYYNLFDYHKAITVFKKVVIHKKTIFGTGSL  
KFNESLLHLAMISSDIGQHFKATELLEPAITVIQNHYGENHVKTADALMHLAKALYAVGN  
YARSEKLLRKALSLYTDSFSSEHLITAEVYHIMSSYRQKGYKESIDMLNKALKIRRE  
YGDNDNLVAELKVLAHAYRHIGEYNTALPLLKSAISVYKNKYGINNMNTAWAMTYLGH  
FWDSGKINDSIQLLTQASEIMTKNYGEENLYTAWSFRLRGYILTATGSYDKAREFIQKGY  
KIYGKYYKYPHIEKAWSDAYIGSFYNKTNKLTALSHLKKALEIYQKQFGKNHKRTNWK  
IMLADNYSRRGDFAKALKLSEEAYESYRLHYGEQHSKTALSQAVGRIYFAHGLSKGEKL  
VRESLKILESQNSSKLYSTFSIMADIAFKKAQTHKRNGKMIKAQHYYRKSQEYLDQSLKI  
AKRNLLSDSEHIKFLEQSAKLASMNFLDN

>gene\_518|GeneMark.hmm|324\_aa|+|1554|2528 >NVVL01000013.1 Rickettsiales  
bacterium isolate NORP64 Contig\_source1382A\_8708, whole genome shotgun sequence  
MWSKIVKNLIRAAICTLFGISANATTLNPNIIITHNVGLSSVDM EHEIERVQHQDNLLFSV  
EKTLSLLAQLNEFDLGCFLLRNKGLNGYWTSYLILQDKGQFDSPLEDWLIKKAPTVLATR  
ERFYIFQDKAKSIIESKSSNEQINIASIPCGVLSDLLTMKFQTKAKVKFTGIDLDETSIK  
MAKINAENFPKMHQTQILKRDAWNLGLKDEFDIIMSNGLNINIEKDEDRLVALYKEYKSL  
KTGGKLITSFLTYPPAFSKDSPWKNVILEDAQKQIALFRDILGAKWMVYRTEKEVRQQLS  
EAGFVVEEVIYDSKHIFPTIIAKK

>gene\_519|GeneMark.hmm|124\_aa|-|2730|3104 >NVVL01000013.1 Rickettsiales  
bacterium isolate NORP64 Contig\_source1382A\_8708, whole genome shotgun sequence  
LENIKMKKLHKALENARHFGKKQFIGLKHKVGVSNDFQHG METVAEQVKHVNKLLSITED  
NLSYLNRLVDYINDCIDRIVETLSNIIDILNEFFDDVLDN NCINNLDFFLEEAADILGEY  
EISD

>gene\_520|GeneMark.hmm|75\_aa|+|3620|3847 >NVVL01000013.1 Rickettsiales  
bacterium isolate NORP64 Contig\_source1382A\_8708, whole genome shotgun sequence  
MGVDGSAECKAYSPAFCFGLRVGAHLERGEDVVELAKRDANPLVLDGECDEIRSSLLGV  
LQETPICKFCADVGF

>gene\_521|GeneMark.hmm|549\_aa|-|3844|5493 >NVVL01000013.1 Rickettsiales  
bacterium isolate NORP64 Contig\_source1382A\_8708, whole genome shotgun sequence  
MSTDSESRYSQSLMAFNFPVSRDDAPQRARYNEYKEAISQEKLATLLCQGKTIKSLTP  
IELAALISFAVSNNYIDEIARLVSEVGIDVNTLYRDVDYDNLMKSTDFVLSPRVSRVSC  
LLYNAYRLENSEDAGRHFHGMGYVSKVIMGFNIDVSALSEYDKMLILEESMRYEDLADISD  
ILRVELPELSVDNKKLLLILAITNIAPIRGILTLLGIEDINELSPNLISAF LHCASMHSI  
LKYVIDTWEVKLQVFIDDVEALYLPDTHISFGFAPEMILSHLSYAEFLQIELKLQDYLL  
HSSEHSVGRPEWLPNIIIEQRHLEQCLVKS NKVTP EINVYCSWRVVSFITQCIETKNLQAF C  
QILTPRIDASSWNEEGDCTDHSLCVLLVEIAQCAMREEQAPQLLMLGGAVFDNMMRACKN  
ACYYEDPYNERWDITLEMVINQVIVGEGGLS QLLLFLRENDVFAELNLLDSQDNLESISS  
VEMRK FVELWEYSMQHLFFNQLLDQYLSCETNDKSELKNALLATSFGKIFQDDDDLSGSS  
SGLCQSDHP

>gene\_522|GeneMark.hmm|39\_aa|+|6149|6268 >NVVL01000013.1 Rickettsiales  
bacterium isolate NORP64 Contig\_source1382A\_8708, whole genome shotgun sequence  
MAAGSRWTIEECFEMAKGEVGLDEYEVRSFRGIAVSHRQ

>gene\_523|GeneMark.hmm|108\_aa|-|6341|6667 >NVVL01000013.1 Rickettsiales  
bacterium isolate NORP64 Contig\_source1382A\_8708, whole genome shotgun sequence  
MTTEQTLAEEISEGLAEAIKFAKGEHVEGCVTYMFNDQEICPRDIRQSLHLTRERFHEWF  
VCKVSNQRNWETGLRKPSEVTLAFYSMIKENPSQVYKMLHHS TIPKNG

>gene\_524|GeneMark.hmm|72\_aa|-|6673|6891 >NVVL01000013.1 Rickettsiales  
bacterium isolate NORP64 Contig\_source1382A\_8708, whole genome shotgun sequence  
VELAESGKSDGKLNIEEKAVVLGLSTNYYDKKNVLFLLATYSKNKKEDLSAKEQKQISNL  
TKELIMSFNQNK

>gene\_525|GeneMark.hmm|355\_aa|-|7489|8556 >NVVL01000013.1 Rickettsiales  
bacterium isolate NORP64 Contig\_source1382A\_8708, whole genome shotgun sequence  
MVSTIDENNTVHVQIGRLKGRDLAIALKSKEVVVALGDSLTHLDRLEGIYLAITLKSKE  
VVAALGDSLTHLDRLEGRDLVNALKNKALVAALGDSLTHLDRLEGDDLVALESDAIV  
VALGDSLTHLDRLEGYDLVNALESDAIVAALGDSFTIQIGRLEGGYLIYALKSKKVVVA  
LGDSLTIQIGRLEGRDLVNALESKEVVAALGDSLTMHLGRLEGDDLVAALKALMAALGDS  
FAEYAATLSQHKWYECAKDLNLPKEVMLAVHDFGEVNNWNPNILKTDVLRNFSSAPATA  
IAIATATDKDLKLCVPSDLTQIIMS FVHLNCPQNDQVDILALEESDSGTGGSNS

>gene\_526|GeneMark.hmm|164\_aa|+|8704|9198 >NVVL01000013.1 Rickettsiales  
bacterium isolate NORP64 Contig\_source1382A\_8708, whole genome shotgun sequence  
MAIEIQSIKDLLTIVDNLTKTLEQLRKGDTLVVWKLDRGRSLRHLELINELEAKEIKF  
RSIQDGDITSNSIQFFFHITGAFaelERNLIKERTKAGLAAARARGRKGGKPSLNKQQ  
TQMMELEYQARSASIMEICDQFKISRKTFYRYVEKAKIMADANP

>gene\_527|GeneMark.hmm|1212\_aa|+|9754|13392 >NVVL01000013.1 Rickettsiales  
bacterium isolate NORP64 Contig\_source1382A\_8708, whole genome shotgun sequence  
MSKSSNVGAEQNMPAVVFNKAFWYQGHVIVKLWEKYLTskNDSISFLSARDGEVAGEDNV  
SSLFNGMSLNYNFAIVLQGNLYRNSSDQTITLCGEVADRDVASITRRMEAIIEQIRSYN  
QSHPEAAITNHIIIFPYHRNPGHWNLTGVELTFTSNDDNDEQINARISYEPFGGVSTGY  
DHLASSLSDLNIVFEQNKLSATKQYNGTSCGAI TAENAKLFLAQSLDDQSGDLLERTYK  
AGAEELRRQHIAEIDDKAFNQTQRDNQAYAVGGDRSIEEAHTATQSLADLIAHADRDWVK  
QAIRHLLNSEDDNIRRDNIDLFKQFLLQQYNEDDQYSKIAGMLLEADGRFKEGAMDVIA  
AVVFREDNSQFPTFSATNSSARHETTvtLESSDYDNLDEAKVILDSVKKVSLDDLIIQ  
GTYSFVPSKPTARALFKNTDTEETIIFGASDNLLFYIASLENGFEVIPRIAFGIRKVLDS  
HGNNILHHAVFRQDLNLVTAILHRAMLDGIISDLVNRNHDGTNPLGMAFLSTDSNNLGG  
IKIATIFAGIFAYDITGYLNNKVHMDYTTSTTIGGTTLLHNVM LAASKCKGQEFKALSE  
FFKVLSKRMHDDKDCFNPNYPTMNPGLGELENGKKLDSKKLDGHMISSSKLLELKFQSQ  
GIKLLCKKYFD FILASYEVDQFDDDSGDSADEDSPAYTYKQMLLDFNRFIGNSIKGHTR  
KSHANFQRTFDAYDSDFAFFSDAMEGLSITEDDPWNNFWLKLNSISADSTESA EYKEVID  
SMYVPLFHGVPFMHSQYSNFQRREVAKKIFAINRKLGRFDDSMTEVEYTLTPEEEILIG  
IHSRTATASAGMQSLYEIMVASPEDLQRLNTIDENLWGYFNHDLPKKFKIAMKD YVFN  
ASSPIRGFWENNNNDGAPHSDELPPSDDEIVKYRFPVIATSKAPDHAIRFAIGNVEAA  
RGEIRMQPEYIDGFPTHRLAGLLYVTMHKLSDLLEARGNHTMIDVNRRVKSGDIDIPTEN  
IEKDPDFLRFKNQLECDFLGKISSDTVVAVIPVIYPNIHDGDFESGYHEAVFGLNSSAT  
RIYVTSPVKIRGDLNQP NPKIMSGSSNIVGFGKVIPTMVALANGILTAIAEKYGYFLC  
AIRDDNELVPYKVKFDERKKKGAGQLSEAQLDIKNSGDIPQAIRLWQSIADQTEEDSDVA  
EIGSMLSNAHID

>gene\_528|GeneMark.hmm|106\_aa|-|13615|13935 >NVVL01000013.1 Rickettsiales  
bacterium isolate NORP64 Contig\_source1382A\_8708, whole genome shotgun sequence  
VINAINFSEKGI AISVDREKYFASF AIRDEGKGIPKTEIYDIFTPFKMGSNTESKAAGR  
GVGLALCKAVIEAHDGEIKAESRPV GALFRVCLPYAGALQNGTKSF

>gene\_529|GeneMark.hmm|158\_aa|+|494|970 >NVVL01000014.1 Rickettsiales  
bacterium isolate NORP64 Contig\_source1382A\_8750, whole genome shotgun sequence

VTPSSLIAAKASPRCLKNNYKIHMFNISPLQFYTVLGLLLFSFLSTPAYANGGVQTTLET  
DEAPGSLGDIPESDFFEFQDEPLEGPLTLPDWFKLSFLELSNDIIDLKENNKNGLIVYFG  
QKHCAyCxAHLEHNWQAPFIVLFLSKIDKKRQYHIILL

>gene\_530|GeneMark.hmm|380\_aa|+|985|2127 >NVVL01000014.1 Rickettsiales  
bacterium isolate NORP64 Contig\_source1382A\_8750, whole genome shotgun sequence  
MNKQSGKYLTQKIGGEEYKAYIPFKLPPGGGIDLQKLHPYLEKATCAIAELNGAAKFLPN  
HSLFIYMYVRREALSSQIEGTQSSFSDLMLFENDQKPNISLDDVEEVSNYVKAINYGLE  
RIKNGFPLSLRLLREIHEILLSGIRGSLKSPGEFRRSQNWIGGTRPGNAFFVPAPPEQMM  
DCLYDLEKFLHDDSVPTLIKAGLAHVQFETIHPFLDGNRGLGRLLIILLHAEGMIESPI  
LYLSMYLKQNRETYYSLLQEVTRGAWAEWLEFFLQGVIAASKDGIQTAQEINALFKADF  
AKIESLGQIKFSCRVLEHLKHLPOISVRHLSQTLAITPPTARNCLNKMVSLGILEETT  
KKRDKIYVYCKYLTLLEGEV

>gene\_531|GeneMark.hmm|271\_aa|+|2400|3215 >NVVL01000014.1 Rickettsiales  
bacterium isolate NORP64 Contig\_source1382A\_8750, whole genome shotgun sequence  
MFLIIGKVIVMGDIVDRKALKYSTASGEKNISSPKEPVEGYDIWESGKVVGSIDVWWDSD  
QDIQRSLADESNSDQVLLILLDRHNIISGNIEYVEYFLGCIAPHSISPYANLVMYSAK  
SEEMQKYLLEYCEMHKLDGRKKLFAYFLCKSLLKNDIESAKSLLKHCGDNEIDYVPVLD  
IWNILRYTPANGASSLDYSLAVDAILYILETHADFLDYTQTIIDVKRYDGVLYQKGL  
LEGQVLENSSEWNNESSEMVGGSTESMESLD

>gene\_532|GeneMark.hmm|107\_aa|+|3592|3915 >NVVL01000014.1 Rickettsiales  
bacterium isolate NORP64 Contig\_source1382A\_8750, whole genome shotgun sequence  
MAKEDKADGFEPWIMGGFLNILDRDISTKGYPSGMSNEDALLFLLKGDNLSPETVQFFN  
GLVDQSPESNDERAHFILFGENSTEVRDVELEPEPECNFDWSFTDF

>gene\_533|GeneMark.hmm|792\_aa|-|4068|6446 >NVVL01000014.1 Rickettsiales  
bacterium isolate NORP64 Contig\_source1382A\_8750, whole genome shotgun sequence  
MIFTLWLKQFLDQATLEQITNTLTMTGLELEDLVDSKELEAFKVAKIIETEPHPDAD  
KLKLCVKVETDSKTLQIVCGAPNARAGIKVVLASIGTVIPSGNFKIKKSQIRGISSGMMC  
SADELNIPGDSSGIIELPDDAVIGDAAAKYLGLDDPIIHINITPNRADALGVYGIARDLA  
ASGLGLTKKLGNEPFEFQEFETKTTLNVRGSEACPLFAIREIKDLENKESPTWLKLLDNI  
GVGSISPVVDVTNYISYSFGQPMHAYDADKISDNIIIVETLSSDEKFKALNEKEYELKTGD  
IVIRDEKNIHCLGGIIGGENSACDKNTKRIILEAASFDAEHIAKTGRRLIIDTDSRYRFE  
RNVDFREFTHMALDFATDLILSICNGVASKMVSSGDPALPVRTIDFPAGFLESRTNISLAP  
QEIEDILCKLGFICTNIGESIKITIPSWRYDVSIEDIVEEIVRIYGYDKIPETPLPEAP  
IARIIPRDQRRVSDIKRLLASSGYDEIVTWSFMDSEKAKSFTTIKEELTLLNPISDLDY  
MRPSILPNLLRVANNINRSFHDLSLFEVGPFIEDTGHKVITHASGIRTGNIAPKNSHEA  
CRVFDLFDVKADIAAILESAGLDINKCQIRQNAPDYHPTRSASICLGKNVLYGQVFGVHP  
LILKEFEIDADVIAFEMNISALPFGKEKYGKKPELVRSYQAITRDYAFVVDKQDPVGM  
LSFIKNADKKRVKSVNLFDIYSGTHIDADKKSVALSVDIQDDAKTLTESDIETINKAIID  
GIEKKFSATLRG

>gene\_534|GeneMark.hmm|346\_aa|-|6443|7483 >NVVL01000014.1 Rickettsiales  
bacterium isolate NORP64 Contig\_source1382A\_8750, whole genome shotgun sequence  
MLEEILQSADEKINSKSKELQDIKVEFLGKSSLINQEMKKLGKAAPEERKELGQKINS

VKQKIQELIDAQSILLQKKEFTERFASEKLDLTPARPRATGSIHPITQAMEELIQVFSK  
YGFDIKDGPSIEDDWYNFTALNIDENHPARQMHDTFYLKTSSESKLLRHTHTSPIQIRTM  
QNEKPPYRFIAPGRTYRSDSDMTHTPMFHQIEGLVIDKNIHMGHLKHVIIDFIRSFEEQS  
NIEVQFRPSFFPFTEPSAEVDIRMNKDDKWLEVLGCGMVHPNVLKNVGDPEEYQGFAGF  
LGVERFAMLYGIKDLRQFFEGDMRWLNHYNFKTLDIPTLAGGLTR

>gene\_535|GeneMark.hmm|87\_aa|+|7742|8005 >NVVL01000014.1 Rickettsiales  
bacterium isolate NORP64 Contig\_source1382A\_8750, whole genome shotgun sequence  
MVFSKVVFNENLVTQLRLLIIMATGTVKWFNNTKGYGFIAPDDGTDKDFVHISALEKAGM  
SGLEDGQKIKFEVVNEKGRDSAGNLEV

>gene\_536|GeneMark.hmm|38\_aa|+|8601|8717 >NVVL01000014.1 Rickettsiales  
bacterium isolate NORP64 Contig\_source1382A\_8750, whole genome shotgun sequence  
MVFLLRAIRDQKSYPTVAAALEFLRLPALSDTDYD

>gene\_537|GeneMark.hmm|413\_aa|+|8790|10031 >NVVL01000014.1 Rickettsiales  
bacterium isolate NORP64 Contig\_source1382A\_8750, whole genome shotgun sequence  
MEKFSEAGIPEPLLHRLTEMGFTTPTPIQAEAIPIHALEGRDILGSAQTGTGKTGAFGIPL  
VTHLMNNAKGSALVLLPTRELAVQVMKALEQFTGRGKISTALLIGGEDMQRQYRQLNAKP  
RLVVGTPGRINDHLTRKSLKLNDFLALDEVDRMLDMGFGIQLDAIAKHLTAKRQTLMF  
SATLPKNIQKLSAKYLNDPVRISVGATHAPAANVKQEHVKLTDSEKYPRLLEISEREYS  
IIVFVKTKYSADGMAKRLKNGHKVDALHGDLRQNKRSSVILAFRQQKYRILIATDVAAR  
GLDIPHIQHVVNYDLPQNPEDIYHRIGRTARAGAEGNALSFLSPADGIKWRAIQRLNPD  
LKDNSGGEGRKKSGRKPFGKPGAGRSRGTGKPGQRRPGQNKPGQNWKGRKAA

>gene\_538|GeneMark.hmm|402\_aa|+|10600|11808 >NVVL01000014.1 Rickettsiales  
bacterium isolate NORP64 Contig\_source1382A\_8750, whole genome shotgun sequence  
MIDRKVRYLIEKALSRQPAVAIIGARQVGKTTALDIAKGRSLYLDLESYIDREKLQDP  
IFFFDQYPDDLIIILDEIHRMPELFQTLRGVIDSDRRKGKKTGRFLILGSAGLDLLKQSGE  
SLAGRIGYVDMTPLTALEIDPNDVVKLWVRGGFPESFLGSSSEDSFLIRKDFIRTYLERE  
IPQFAPRFPVETLERLWMMMLAHCSGGMNLSSKLANLSISTKTVSFYIDLLVLDLFRRL  
KPFHANIGKRLVKAPKIYIRDSGILHATLGITEYNALAGNPVIGASWEGFVIENILSVVQ  
AGTRASFYRTSAGAEIDLVEMPNNDIWAIEIKSGLTAKPSKGFYNAIEDIKATHRFVVY  
SGKTQYPISENIQAISLIGIMKLEATSAGLKDPASSAFGGG

>gene\_539|GeneMark.hmm|613\_aa|-|11961|13802 >NVVL01000014.1 Rickettsiales  
bacterium isolate NORP64 Contig\_source1382A\_8750, whole genome shotgun sequence  
MKNKDQPFREQISFEISDLETYVEGVAHDAEITPLANWMTLKSQIYTEGLKEFHVSLNKT  
PPMTIEQIREQHSKALLHDLEMITKRQALVEYNIPPFQEAIFYKEINKPNDRSEEYNNFVI  
ACSEIQIDAHFIERVSAQALLKLNENNVTVKILQEHDRELSNYLEEHKRETARDLSRTA  
ILLKTENGMVRGSFVEEIMTSKEINLTGEQREFIISWQQGLFDLGWAASCVSVLHKAHP  
DMENIWGMDTPRDRTSIFIDTSDGEVKILNRSKIILRSQDDPEGELKPYLEM LASVNITG  
LTSNEFIPGCATAPPEIRFDINRINENLEFTIPENLTLKTSNPLDAYTRLRKDTIEEYF  
DSIKNDRPISSFAWEGLKNIMGDAESIKYAATHIHPKSEKLLKATLLKINILADEASNHP  
VNFSDLSTASIAFCSTESDKEKQEEFTSKLLASCSTHQITITLGDREIDSMEEAVVSIMT  
PLLDYSNEDSLRKNNAKIIRESSSKLGIKFSWSQRWEQLKDNTSNLFTTLTGGTNSAHEF  
MHNPENARIIQNINASLSKRSKGFPHAPVTTPPRKRFEPPHPPETKPPVEVSPNPPTS



VVHKKKTNSGRKH

>gene\_540|GeneMark.hmm|307\_aa|-|3|923 >NVVL01000015.1 Rickettsiales  
bacterium isolate NORP64 Contig\_source1382A\_8784, whole genome shotgun sequence  
MKHIHIQDCVPSLFQEAPPADKQLTDAELAGAVVAARGRGLVFSMACQQNETPEHDFLK  
EVNVLIRAEYKAAVKWCMSHGTCGVSGETLDWVAELATIFITGNNTRHVAKSFHPYREIY  
NPGEEAQIFALFSEMENSPPGELISKFLKIFDVANAAQIVEAVIDSIAADEDLASIIRAG  
LSNAGDDEITHGLVEEIIIKILIYSQSDSTIRGANAYLLQQVIEKHPTCADGIREVYMAQ  
EAMHSAAANMVPYLQEPLLDNKQLADAVVAARGKGVFFTRAYQDIPPIELGSWTEVNALI  
RAEYEAS

>gene\_541|GeneMark.hmm|91\_aa|-|1113|1388 >NVVL01000015.1 Rickettsiales  
bacterium isolate NORP64 Contig\_source1382A\_8784, whole genome shotgun sequence  
MAATGRDALRMLAKTEYNLIFIQKTPDIALQIRSETELNREPAIISVLIPRTPVKQDPK  
YLDAGIDYVLENPLIGDKIEEVLEKFGGG

>gene\_542|GeneMark.hmm|115\_aa|-|2207|2554 >NVVL01000015.1 Rickettsiales  
bacterium isolate NORP64 Contig\_source1382A\_8784, whole genome shotgun sequence  
MAVKIRLARGGAKKRPYYRVIVADERAPRDGAFIEKLGTYNPLLKRDEDRVSLKADRIE  
HWLARGAQPTERVARFIKEAGIKLPDSILKKMEIKQKAQTTKPSKELKEQAKAK

>gene\_543|GeneMark.hmm|57\_aa|-|2566|2739 >NVVL01000015.1 Rickettsiales  
bacterium isolate NORP64 Contig\_source1382A\_8784, whole genome shotgun sequence  
VSKKKSKNLLVKLSTADTGYLVKKNPKTLTEKLSFRKYDPKVRKHVEFKEEKIK

>gene\_544|GeneMark.hmm|505\_aa|-|2855|4372 >NVVL01000015.1 Rickettsiales  
bacterium isolate NORP64 Contig\_source1382A\_8784, whole genome shotgun sequence  
MLLRSGIVIAFFTMLSRFLGLARELFIAATFGTSGIADSVNVAFKLPNLFRRIFGEGALS  
AVFIPMFNEKLITSKDEALKFSGEV FALLLLILTVLTIILQISMPYMMLIAPGFFNDPE  
KYELTTTLCQITIPYLIFVSITALFGGMLNSVKFAAFVPIIMSICVIGITYVFQEKH  
SPHFSVAYALVIAGIFQVAFMYVCLKRAGLTFPFLFHPKDREVKKLLKNMGPATLGSGAQ  
QLNLFLSQSIASFLPGAVSILSYAERLYQLPLSLIGITFGTLLPELSRIYKQKDFAKAN  
TLQNSIKIALAISIPAMFGLFVLSAPIIHIIYEHGAFTPADTALTANALAAFSLGLPAF  
VVAKIITPIFYANLDTKTPLRITVYSLNLTILNVILMIPFGHIGIAIGSSIASWFNVWM  
LARHSGKYGGFKIHPDIKLSAKIVLSSCMLASIVTFNYYYGYLFYSKSLIKASALTG  
VVVLGVFVFLSSYFLKIHTKLLER

>gene\_545|GeneMark.hmm|55\_aa|+|4371|4538 >NVVL01000015.1 Rickettsiales  
bacterium isolate NORP64 Contig\_source1382A\_8784, whole genome shotgun sequence  
MSFKFMFLESVSNLVFCTIFSRNQGISRLFLEGFLGKMDGWMVIAIKIRSLSL

>gene\_546|GeneMark.hmm|68\_aa|-|4670|4876 >NVVL01000015.1 Rickettsiales  
bacterium isolate NORP64 Contig\_source1382A\_8784, whole genome shotgun sequence  
MTTGIVKWFNPTKGYGFIAPEDGSPDVFVHISAVESAGFNNLNEGEKLEFEVSDNKGKQS  
ATNLKSLG

>gene\_547|GeneMark.hmm|303\_aa|-|5049|5960 >NVVL01000015.1 Rickettsiales  
bacterium isolate NORP64 Contig\_source1382A\_8784, whole genome shotgun sequence  
MQIRIGTRKSKLALIQTNMVIRVIERHFPGAECIIVPMVTTGDKITDRNLYDIGGKALFL  
KELEEALLANEIDLAVHSLKDVPGILPEGLLVAAVLEREDARDCFISADYKSIQELPHGS  
VIGTSSVRRKIIIQQERPDCLKLVQFRGNINTRLDKLKNSDIDATILAAAGLIRSSLFDPA  
YCHMIETSQMLPAAGQGIIGIEIRDDDALTREICAKINHLPWSVAQAERSFLAYLDASC  
RTPLSAYAVLSGGVILARYMLSDDDGRFVFHHEEEAEEEHASDMGESAGEKLLARLKA  
AV  
MQQ

>gene\_548|GeneMark.hmm|318\_aa|-|5997|6953 >NVVL01000015.1 Rickettsiales  
bacterium isolate NORP64 Contig\_source1382A\_8784, whole genome shotgun sequence  
MIKFDREKDKVAIIAPASGANDDDGVLDVEKSMEKLGVAMNLFQNAAGFRCEYDDKIFAGD  
SLGYFAAPRAERLRQLKNALEDPEVKIISAFRGGYGCSEIVFDCLDVNPSGAKILIGFSD  
ITVLHFLFNQHYNFPSIHTLVNDSYKHMFGDVLSVLSGGDITLDTPLNDAATSATDALV  
PSTTTAISAPAI  
SAEMLGGNMTLICSLLGTLKHPNISGKILFIEDVNEKGYRIHRSLMHM  
HNAGLFKEAAAVIFGDFTKADKHAEATLRVFSAEYLGIIAAYKTTGIGHGRVSH  
PITIGG  
SGKIEGNQLVVSSSFELI

>gene\_549|GeneMark.hmm|604\_aa|-|7026|8840 >NVVL01000015.1 Rickettsiales  
bacterium isolate NORP64 Contig\_source1382A\_8784, whole genome shotgun sequence  
MTDHKFIRNFSIIAHIDHGKSTLADRLIEFCGGVQKREMSQQILDSMDIERERGITIKAQ  
TVRLEYKAKDGNIIYHLNLMMDTPGHVDFSYEVSRLAACEGSLLVVDASQGV  
EAQTLANVY  
QAMDNNHDIVPVLNKVDLPAAEPDQVKEQIEDVIGIDASNALLISAKTGLGIEDVLEAIV  
HRLPPPKNFVEKESPDALKALLVDSWYDQYLGVVILIRVFGSLKKGMMKVKMLSTNKTY  
NIDNVGYFTPKKVMCDSLEQGVGFFTASIKKVTDCKVGDTITENGEEVQMLTGFKPNLP  
VVF  
CGLYPTDASEFETLRDSLEKLHLNDASLEFETETSTALGFGFRGFLGLLHLEIVQE  
RLDREFDL  
DLITTAPSVIYKVNLTNGKQMEVHN  
PADFPDVQTIDS  
IHEPWIKATIMVPEE  
YLG  
SVLALCTDKRGVQVDMKYIAGRIMLIYRLPLNEIVDFDYDRLK  
SCTKGYASFDWEMD  
GYEVS  
NLVKSILVNSEPV  
DALSTIVHKSRAESRGRDLCNRLKDLIPRQLFQIAVQAAIG  
GKIIARE  
NVKAMRKDV  
LAKCYGGDVS  
RKRKLEKQKAGKKRMRNVGNVEI  
PQSAFIAALR  
VGDS

>gene\_550|GeneMark.hmm|351\_aa|+|8976|10031 >NVVL01000015.1 Rickettsiales  
bacterium isolate NORP64 Contig\_source1382A\_8784, whole genome shotgun sequence  
LGGLFDPVSLKQRLDELEEISLDKDLWNP  
KKASTLLKEKS  
LLEKTLGLYNHINDGLAEN  
IELASIA  
EEENDTKMADQIQKDLEAIAKSAEKFETECLFSGEADNNNCFLEINAGAGGTE  
SHDWAL  
MMMMRMYMRFGERMGFKTEIINIINGEDAGIKSCCIKFKGDMAYGWLKTESGVHR  
LVRIS  
PFNSAGKRMTS  
FASCWVYPEVDDNIDIVIEDKDLRIDTYRASGAGGQHVNTTDSA  
VRITHI  
PTNIVVQSQND  
RSQHRNKA  
EAMQMLKARLFDLELKKKTEESDKQNAAKTDNGWG  
HQIRS  
YVLQPYQMVKDLRTNYETSNSAKVLDGDLEKFVSASLAANANKING

>gene\_551|GeneMark.hmm|443\_aa|+|10090|11421 >NVVL01000015.1 Rickettsiales  
bacterium isolate NORP64 Contig\_source1382A\_8784, whole genome shotgun sequence  
MKEKRIGIFGLGVTGESVFTTLDGADKVDGTDKEIICWDDSEDNRRNFQTKFEHSTLAPL  
SSPEW  
SKLDTHIISP  
GISKLHEVFS  
LAASHNILISSDVQLFIDNNP  
DSELIITGTNGKS  
TTTAL  
IGHILTC  
SGIDHDIGGNIGPAVLSL  
PKNKYYVLELSSFQIDLLK  
KFEP  
AISVLL  
NLTPD  
HIDRHGSF  
DKYCAAKARIFDNDGLKII  
GTNSDKSKELYEKLKKTGDKK  
VIPISSD

EGINCTSDTITDNFFDRKSYHMETLVNLTGVHNCENIAAAFAVCRAMGLKAGEIIQHIKS  
FGGLKHRMQLFNGNIENISFYNSKATNTNSAASSISSLDNVLWLAGGVFKEDNLKPLGNS  
IKNIKKAYLFGESKLLFAEYLEGIAEYKIYDNMEKAFYSAVRDAKIEGESANILLAPACT  
SLDQFKNFEDRGERFIQLFEAIK

>gene\_552|GeneMark.hmm|371\_aa|+|11422|12537 >NVVL01000015.1 Rickettsiales  
bacterium isolate NORP64 Contig\_source1382A\_8784, whole genome shotgun sequence  
MYGFGKNNFVQRWWRGVDQQLIIALTILIAFSLMLVTTTTSMIAIEKIGLRDNYFSLRQVI  
YLFISAGLLILFSSFDKKWIKRIGILGFLVSIVMMILIKFYGYEVKGARRWISIAGFSYQ  
ASEFLKPPFWIVTGWILSLKYHEDFPSFTVCAALYIIVASLLITQPDFGMLVLVTAVFGT  
QLFVAGLPLIWILFASITGFLGVISAYLLLPHVASRINSFLDPSESNYQVSKSILAFEQG  
GLYGKPGEGAIKQYLPDSHTDFIFAVAGEEFGGIICMIIVLVFAFIVLRTLINLRTEFN  
KRVQLAAIGIITQFGLQATINMGVTLNLLPTKGMTLPFVSYGGSSTLSIAIAIGMLLGLT  
KKQALFSRNRM

>gene\_553|GeneMark.hmm|376\_aa|+|12628|13758 >NVVL01000015.1 Rickettsiales  
bacterium isolate NORP64 Contig\_source1382A\_8784, whole genome shotgun sequence  
MKKEKTILLAAGGTGGHLFPAIALSEELSKHNSNILECNILECNHILITDLRCKKYLTPK  
LPFAHIVDLHLNNGIFAKLKSARKIVAACYRSFFLIRKIKPDVIIGFGGYPTFPMSLI  
CKLMHIPIIVQEENSILGKSNHFFAKSALKIALSYSNTSNIDESFKSRICISGDLIRSSI  
LKLAACKGSNAKKFRSKRFHIFIVGGSQGARIFFSELIPPALALLKKQHPGADLFITQQAP  
KTEQPRIEALYDELNIKYELAEFFHNISEIYDKAQLVIARSGAGTIAELAATGLPAIFIP  
FPSAAQNHQYFNAKSIEDMGAGWCFVQEEVSAPILAALKSELLEDRLLEDASRKLARK  
TDGSKYLADTILKIIQ

>gene\_554|GeneMark.hmm|726\_aa|-|1|2178 >NVVL01000016.1 Rickettsiales  
bacterium isolate NORP64 Contig\_source1382A\_9413, whole genome shotgun sequence  
VFGILLTGKCRYMLFDIDVIIVAAFLIATLVIGLGHGGDVKTIKDYALGGRNFSTGALVA  
TVVATWISGSGFAITISRTYYDGLYYLVATFGMMISFLITAFYFVPRMGEFLGKTSIADA  
MGDLYGKKVREISAISGIIASAGHIAVQFKVLGDIVSYFTDSNSTLTIIVAGIAVTAYSA  
YGGIKSVTFTDVLQFFTCFAIPLIGMMIWNKLYLVDSFNMSHALQIDKFNYEKVLDLKN  
HRFWEMIPILIYFSLPGMKPSLFQRISMGNLAQIKKVFIISAFIIFVKIAIAWIPFLV  
FNANPNIEQQQLFGYIVDNYTYTGLKGVFVICVIAMSMSTADTEINISSVLFANDACSGF  
QISPKRLLLSKIFALGLGIISTFVALSTADLLDIILSTASFYMPIVSTPFMLTVFGFRS  
TGKSVLIGMGGGFITVVAWKAMGIQANPIAIAMLVNLIIFLMGSHYLLGQTGGWVGIKDRS  
FLEKQKDENIRKRREIFEKLTFFNFDFCKKYAVASNITYVGLGIYFVFTITTMYSIEA  
TLLQGRGQIIFAIYQIMMVTGTAMAMYPIWPVSIKSSKELIIQTWWPIAIFYMLILFST  
FFVLVNKENHLQFVIFAINMIIAIVLGWRTASIFIATGVYLSVQFYKYMGIDYIDISI  
GSPQFVLMYILMLIGTVTIIFLKPQQEHQKQTEHRVGELSDEVTLVTVVSSRDSQIITL  
DTKVSG

>gene\_555|GeneMark.hmm|81\_aa|+|2218|2463 >NVVL01000016.1 Rickettsiales  
bacterium isolate NORP64 Contig\_source1382A\_9413, whole genome shotgun sequence  
LHKCEHASTNNDPRYSRKLGLDGGFSMPQTLDDYNSKSFRRGRELSSFLQLFEAAHAVRR  
GIYPRFQGGKSKIRGILGLRT

>gene\_556|GeneMark.hmm|222\_aa|-|2567|3235 >NVVL01000016.1 Rickettsiales  
bacterium isolate NORP64 Contig\_source1382A\_9413, whole genome shotgun sequence  
MEEEQRYSKLNRTFARRIGKSLSNLKDLLSGELPKYSYSSEKLEANRAGKKTFFLEIGF  
GMGEHFLSQLANHPDAVHIGVEVYLVNGVANVLKQLEHNCAELMLWPDDIDLVLVLEDMPEAS  
IDGIYVLPDPWHKRRYLKRRMFNKERVASFGSKLKAGGFIFASDIEDYFDSACDILRE  
DAGFVIEGDDFSSEHAGYVQTKYHQKAIREGRRPQFVKAIKR

>gene\_557|GeneMark.hmm|277\_aa|-|3328|4161 >NVVL01000016.1 Rickettsiales  
bacterium isolate NORP64 Contig\_source1382A\_9413, whole genome shotgun sequence  
MTDKRDRAAKWFETLRNNLCSAFEIEQDFARDKDISPEKFKQTPWNREGGGGGVMSVMH  
GNVFEKVGVNISTVQGEFSEDFRKKIPGGEDDPRFFATGVSLVAHMCSPVLPAMHFNTY  
IETKKGWFGGGDLTPMYEDAETAQFHESFKTACDKHDEGYPRFKKECDEYFYLKHRK  
EPRGVGGIFDYLSNNFEDDFAFTKDVGLAILDVYPKIVKNKMHKPSKEEREHQLIKRG  
RYVEFNLLYDRGTTFGLSTGGNVEAILMSMPPEVKWP

>gene\_558|GeneMark.hmm|111\_aa|-|4204|4539 >NVVL01000016.1 Rickettsiales  
bacterium isolate NORP64 Contig\_source1382A\_9413, whole genome shotgun sequence  
MKSFRLGIFAELYAMLLYAVRFYGILHHRMKTIVGEVDLVIARGRQLVFVEVKARKNGIC  
EGIVSSSQNRITKAAELFISRNSRFAGYDVRFDLVVIEPYKWPVVIQNAW

>gene\_559|GeneMark.hmm|423\_aa|-|4555|5826 >NVVL01000016.1 Rickettsiales  
bacterium isolate NORP64 Contig\_source1382A\_9413, whole genome shotgun sequence  
MNKRRSIFLSAISGNVLEYYDFTVYAVFSLAIGRAFFPGDSEIVQVFSSLAVFAVGFVTR  
PIGGIIFGYIADKHGRRVSLITSM LGMTIPTFAIGLIPDYSEIGHYAPMILVMMRLLQGL  
CISGEGAGAAIFILEHYQNLRPGF TAGV VHASNIAGTLMATLVGIALATFMPDSEFAWRF  
AFILGGVMGIIGFYFRLRVSETPIFIMLAEKKTLKAPFIHVIKTAWRSMLITFCLGGFA  
SSVVYLIKTYINIFHCNVLHFDDVTARAF LAYSSVIMLLTMPLSGHISDSIGRFRTITIS  
SIAVLV LALPCFMLSCTDMLRQMLALTMLAVLGGMVAGTAYIFIISLFTPEQRFSGVAF  
SYNLGIAMFGGTSAAISRWLLEVTGLHYAPAFYIMLTATMFLTATYFLRHTIRELLDANL  
KNK

>gene\_560|GeneMark.hmm|219\_aa|-|5947|6606 >NVVL01000016.1 Rickettsiales  
bacterium isolate NORP64 Contig\_source1382A\_9413, whole genome shotgun sequence  
MSVSKIGAGHTHAAEDIQVEHDHIPANGQAEHRLVHPRVAVLHNPLHTFGLDLGTVTLLS  
MYTAFSSGTLQQQIDRLVESEEDVVIISLFENAVDNIDSPALKYLLPCIEANPQALGYII  
AWIDDYGHGDFSVLSRIRDNSSDPSGVGAHASGKLAVMHMEALQEEKFDMLVDLLRLVVG  
ATDGVDSPTLVKLESELPEDPPIAIAAGEALIESTDTPIN

>gene\_561|GeneMark.hmm|401\_aa|-|6806|8011 >NVVL01000016.1 Rickettsiales  
bacterium isolate NORP64 Contig\_source1382A\_9413, whole genome shotgun sequence  
MVMFKDLNPISVFLVIVYPLTIITLAVLYALNNSLGFELGLFFAGYYISTISVGVGLHR  
LWAHDTFKTNKFVFLVLM LLSAGTLQGPVLSWASNHFHHTYTDTEKDPHTPLKYKSRVK  
GFWWSHMGWMLYGTGSYQSVNRVTMLKLGKNKLLRWQFKNYWQLGLLMNLVLPFMLGYAI  
GGNLTSACAGILFIGVGRALQQQTFFVNSLCHFAGTHKYVSGTAGDVWWLAICLLGENW  
HNFHHAFPSDYRNGSRWYQFDVHKWIIYLLSKCGMAWDLKVTTEVRINAKMTQAAKALS  
LQTEKLESLNKTINDLSVIHQETLEKLELSSVKAKIKLKSFAKMQENIKTLKLQLDQQF  
KELKAPISDKVVS LITKKARKLESAMQKLCREFEQSNMQAA

>gene\_562|GeneMark.hmm|250\_aa|+|8364|9116 >NVVL01000016.1 Rickettsiales  
bacterium isolate NORP64 Contig\_source1382A\_9413, whole genome shotgun sequence  
MAGHSKFKNIQHRKGAQDKKRAKVFTKLVREIITAAKIGGVDINNNPRLRTAIVGAKSQN  
LPKDRIEKALAKASDPSDNDNYTEMRYEGFVPGGIAIIVETLTDNKNRTVSDVRSFTKH  
GGNLGESGSVSFMDRVGKIEYQASIASADEVMESEAIEAGADDAESTDSEHIIYTNVESF  
ASCLEYLSDKYGAPLASEIEWRPQNTIMLEDLERAEEKLLKLIDALEESDDVQSVFGNYEL  
SEEIFNKLSS

>gene\_563|GeneMark.hmm|246\_aa|+|9127|9867 >NVVL01000016.1 Rickettsiales  
bacterium isolate NORP64 Contig\_source1382A\_9413, whole genome shotgun sequence  
MNKQIIILAAGHGTRMKSNIPLKVMHDVDGKPMIEHVITNCYKASDDLVLVHSHHLQPYLD  
QFTDRCKLANQKEQLGTAHAAAKDLFANEKYIGVIYGDNPLITDEIINDLFTHLEQGT  
SKAVTLAFEYAKPNQYGRIVTDAEGNFERIVETKFANEEERKITLCNSGIMAFAPGILEE  
YIDKCLAPNPEHPEREFYLTEIIEICSLAGEKVSYFKSGNPNLVVGVTQDELVNANSII  
QNHKEG

>gene\_564|GeneMark.hmm|923\_aa|+|10011|12782 >NVVL01000016.1 Rickettsiales  
bacterium isolate NORP64 Contig\_source1382A\_9413, whole genome shotgun sequence  
MEKTAEEKPVLIIDGYGFIFRAYHVQPPLTSPAGAPVGALYGFVSMMLLKLINDFKPEHAV  
IVLDHGGKNFRHDLYKEYKANRPPVPDDLIAQLKLVRTAAEALNFTCLSKQGFADDIIA  
TLATKATSIRNALIISDDKMLQVNEHVRMYDPAKAKHLTDEDIFNKFGVPPSKVREA  
QSLIGDASDNIPGVAGIGVKTAALLINEFGDLGDGLASIDKIKSKRQQNLLTEYRDNALL  
SWKLVGLDCAVEIDQDIENFWAPPKAEIITAFLENYGFKSLNKRIENLFNIKSLPSAQ  
ESKANKQRPERANITQGSIVRIENPAQLEPLFKEIEICGMLAVNIHQNGTEHELVLGAGA  
DLYIVPYIAESPVALDLFSYTNSSVFNPNFKQIHELLENKAIKKITYNLKELLKCDCK  
IQSAEDLQMDYVLSAGGKSKNLAEIIEFYTHNKP GDNGTNQPSAETSEPGDLATSNLG  
KKTGKAAGGGGASITSYFIACYKALDCALIQDKTLYLYKSIDLPLCHILRNMEKEGVKI  
NTQHLVRLSGEFAQKISKLEKEIFAITGKEFNIA SPKQLGQILFDEMKL PFAKMTGKTKS  
YSTNAEILEKLQDDGHKIGGLLE YRHFTKLKNTYTDALPKQTDPRSGRIHTTFLQALTS  
TGRSSANPNVQNIPTRTPEGSSIREAFVASEGNKLISADYSQVELRILSHIANIEPLKQ  
AFREN RDIHAQTASQVFELPLDKITPEIRRS AKAINFGIYGMSAFLARGLAISKQEAA  
DYIEKYFKEYPGIQKYMSETIIAAKENSFVANMLGRKCF LPSINNK NHTLRSFGERAAIN  
APMQSLASDIVKIAMIKLDQEFTKRSMKTKMILQIHDELIFESPSDEVESATKLIKSI ME  
GAFSLDVNLDAGISSGSNWREIH

>gene\_565|GeneMark.hmm|75\_aa|-|115|342 >NVVL01000017.1 Rickettsiales  
bacterium isolate NORP64 Contig\_source1382A\_10295, whole genome shotgun sequence  
MSSRKEEISVVTTSNKTLIVSEEIKKTVCS DIGLET LILNDGIGYVDRSYNKLTELIMPG  
SATHLDCSSNQSHLL

>gene\_566|GeneMark.hmm|263\_aa|+|920|1711 >NVVL01000017.1 Rickettsiales  
bacterium isolate NORP64 Contig\_source1382A\_10295, whole genome shotgun sequence  
MHSSYYLTGEIEGKIYLVYNKNNIPYVLS DTS DGLVFDPRMTNPLELTISLSNNGMFIEL  
ESGHLGSINNIATNVTNRELLLENSPNVNSDNSILSGVCYTISNSNGLLLSFQIYEPDLN  
TLVDGIATEILKIGNDPIINLITNCIRFLPTYYIQG SCLSIDNTDMKSEKSWVTEIGTP

ILGFTNIDECKVGIKYKYCGRNIGCNLLCKGPCKNNTLCFYNNKVDGYSCSKDKGNDGK  
TIIIIILILLVVSFVFLVIRRV

>gene\_567|GeneMark.hmm|276\_aa|-|1891|2721 >NVVL01000017.1 Rickettsiales  
bacterium isolate NORP64 Contig\_source1382A\_10295, whole genome shotgun sequence  
LDFGELTEKITMDGYSTVTHNAMFWLDSKTEKKITKNIKYKFFYDASKTTIDTYWKRIIL  
RMSKGSFPKWFSFYDGNLVYRHRKIHEQISITKLCPIICSVCEIDFIRSKTSMMSKMDKM  
ELDSARKKHTNIKTWKCVKSAKFRSTLINDFIKRTVRENNCNCFREMKGGLYSLLNISVELK  
HIGEEEDIVVDNRIDNIKGLFLSDDGFKITGTHEKQKQKPFIKSDIYMSPKHKRKNVKNV  
KNIVDLWKDNMIKMCDDIQDGTIICENGNIPLILL

>gene\_568|GeneMark.hmm|69\_aa|-|2787|2996 >NVVL01000017.1 Rickettsiales  
bacterium isolate NORP64 Contig\_source1382A\_10295, whole genome shotgun sequence  
MEGGSVVILVGSVILLIYIIFVICYQQKKFIFSPYKQPKLENGFQPNGKVTKLTPIEKM  
NRANRILGN

>gene\_569|GeneMark.hmm|778\_aa|-|3063|5399 >NVVL01000017.1 Rickettsiales  
bacterium isolate NORP64 Contig\_source1382A\_10295, whole genome shotgun sequence  
MLSEDKILNNAIAIAKGTETKALRILADSMGHSTTSYNDHKMAGIFLMECVLREGPKNIG  
EYLEVMSHRLNKRTLSFMVSHSTIIDKELKKNYLVDLNFWDWISASILVRSYLSRPQYGSA  
VFETPSIMRMRIAIQMCSHEGIAKVLDAYGEMNDKLYMPASPTMFNAGMMMSGQMSSCFIM  
SSQDTSSEILDNVKYTSLVSKHNGGYGLDVSRLRHSAGSVGRSSGIIPMIKMYDSSTST  
FGQTGKRAGAGTISCRLHHIDIVQFINVRSNEGSHTNRVFTVGTAIYTPWVFWERVRSNG  
IWSMFCPNLTKSLNDIYGIDFMKEYERIENSNDVDRKTIKARVLLSMISESKRKCYPYIL  
NGDSCNYKSNQKHLGYIRSCNLCTEIIQYAPEDEITSCNLHSITLPSHMKDGTDFDYSALC  
LTAAMCVNNLNNIIDNNFYVLGDKTKTNLDNRPLGIGIQGFFDVVYLLDLLPNSNEVIE  
LNKKIFACIYFSVLAASVDLAIKYGKCKGHDGSPMSEGKQLQFDLWAEYKLLKDNKLIED  
SVRKEEDDIPLSPSEWGQLEIVLSNGEVIENTWESLRIFIKYGLRNTLLTTIAPTATSA  
QLMGSCSEQVECHQANIYSRILHTGNVTVINKYMYRDLSDIGVWSNEISDLIKADGGSISK  
LEAYVKSSIEDYENVIDMHLRYVVKKYKTMYESLQKFMINLMADRSRYIDQSSSLNIYM  
GDPTTSDVTTAILYANAKGLKTIMYYLRRKAANKQPMITINSKIKTFVDGYKECLSCQ

>gene\_570|GeneMark.hmm|356\_aa|-|5462|6532 >NVVL01000017.1 Rickettsiales  
bacterium isolate NORP64 Contig\_source1382A\_10295, whole genome shotgun sequence  
MKPNTPDVFSRGYSVFLDSTKISSDDYITLMLIISKPDIPTYLSSLCTIKGDIPNDIYDK  
KVIEYAKNKISEFVGYDVGEINTTVNSKRLYNLLKDIEHKKEWKSYSMLLKFFGIHSPCV  
NVDMIKTLDRFGYDRKYRDYINVDKFTALYYMDRTHKNFANSLVMSYRGCEILPHQSEFL  
VAVIKHGIVLQALELGLDWSFIEQMSGILKKSDTKKCNEQVSPGKGDGFSKIFNLPYGFA  
MTVSFAYSINSWYALENKIRELEWKVLRIPRLGNHTSIIENSGISLYEDLCESKTLYSLV  
NLLMSSKNKVHKILLYDIENELHKSFCIDIQNKTMSELSVLDMASELTNGGELG

>gene\_571|GeneMark.hmm|109\_aa|+|6519|6848 >NVVL01000017.1 Rickettsiales  
bacterium isolate NORP64 Contig\_source1382A\_10295, whole genome shotgun sequence  
VLGFMSFYKFIFKLMSSKQSLILWAVIFAISYYVFRYKRIRNLSAVAISFFIALLVSFM  
FYVPTTPTDIFESDGMNALYAFVASITYIFLIFYLLLKATSDVESPMESH

>gene\_572|GeneMark.hmm|117\_aa|+|7042|7395 >NVVL01000017.1 Rickettsiales  
bacterium isolate NORP64 Contig\_source1382A\_10295, whole genome shotgun sequence  
MGDVEILELTVGTPQFKDVKKHGDLVDFISWYPTFILFTMDSWNGNKLNGVVYCGKLVG  
DNISFDNTLKFDPKYTNMVDWVIKSKSVLESKSQLPFEDDEVVYEPGYSSVVIDNDY

>gene\_573|GeneMark.hmm|113\_aa|+|7446|7787 >NVVL01000017.1 Rickettsiales  
bacterium isolate NORP64 Contig\_source1382A\_10295, whole genome shotgun sequence  
MTQLKDECKTFGIYSSIEALLLKDSFDPVDKVNKYMELDEMAMLSGLPLEHGNIYAL  
MIHYNNTHEKSISVPLYNGNRLSPKRGMFSFLDDIPKGLILISLYLKCIDL

>gene\_574|GeneMark.hmm|114\_aa|-|7782|8126 >NVVL01000017.1 Rickettsiales  
bacterium isolate NORP64 Contig\_source1382A\_10295, whole genome shotgun sequence  
MSNTTETRWFKIFVSVITAFVVGISIANVVYYNRIRTGTCNAITRGEADAMFWINIIVSI  
SSGLLFVWSLWRLVFSKDLRSQITHGISGHAKSERSGLERKHFGLTNFSSDEL

>gene\_575|GeneMark.hmm|398\_aa|+|8341|9537 >NVVL01000017.1 Rickettsiales  
bacterium isolate NORP64 Contig\_source1382A\_10295, whole genome shotgun sequence  
LNQKVSNNKKELYIMEETQGSEFLYPSLEPTSKVGPKNLWHYTVLEARSKKHMVYNQIL  
LLGDETSRGYYYVSNVVLGGSANNWKAKSGKFNSTGDELLGRLERHSYVYSPSLRIAGPR  
TVITDIFREPGKFLPSGFDAFVYDSEIQETGGRYLKSUYKEIENKRDASKGEKIPESAL  
TNASYLNEIHKALKAAKMGKSKSHKNSNKMSLGAKYMEIITINKTDEKKRTLDTVTKADW  
EKSTGFLKRVKPVTDNSKAGAGSTYKQTIHISETQDNYERALETLIDDVNLDATVKAYI  
KEHLDAAIRDWDWAKSRKGGKSKKVPKSSLSAPRAYSRVKTGRGPVKVDFPEVVVDFSE  
SEEEDESEEDGVTLDGDGDSEEEEEVEVDEGNIFN

>gene\_576|GeneMark.hmm|249\_aa|+|9706|10455 >NVVL01000017.1 Rickettsiales  
bacterium isolate NORP64 Contig\_source1382A\_10295, whole genome shotgun sequence  
MNFVKGESDDMLMEATSTLSKYRNCDFRSTDSDEIYHVSPFVKLLEKYKRKIITLHLSSD  
SYSNDMWLSNTSEILQYGCNTGISSDIRIYISYLYNLSSHENKKIIMLKLYRTLMAACKS  
SFNENNIDDNDIQDLQKSIEYLQATKSPSNAIETLHIPS NKFDPKEMIENLLGSIGDLDL  
SDPGQCMKTLMSMMGNMGIDVETTMKIISGMSGIDKGTESDIKEILDNGGEIKAILGAND  
TDDVTDENI

>gene\_577|GeneMark.hmm|145\_aa|-|10436|10873 >NVVL01000017.1 Rickettsiales  
bacterium isolate NORP64 Contig\_source1382A\_10295, whole genome shotgun sequence  
MSTKMVSLVSSIHRSADPRIFGPGWLWFAIHTLSFDLNEKSDELKFSAMLSKLINNLKCPKC  
KKHAIAYLKRKPITKRQNAKHLGEDVSVFRWTWIFHNYVNSILGKPLVSFIDAFDMFRNN  
TNVCSKGC GSGKSNFRGITPIYSHQ

>gene\_578|GeneMark.hmm|262\_aa|-|10882|11670 >NVVL01000017.1 Rickettsiales  
bacterium isolate NORP64 Contig\_source1382A\_10295, whole genome shotgun sequence  
VHILKEPNYQFRFFITINIDYKMSCTHCKKYEYDCDSQGYKKQCCEGITKVIAYAGEKYLK  
GYKQEWSCDRPKCKLAVVTCMDSRLDVPRLGLCPGDCCIIRNAGGVVTDVVRSLVVS  
RELNGTVEILLIGVLDTVQTVYDGNTLASELEDDLCQSPEFLFETFSSAEKKLKEGVMRL  
LRNPFIKGKECIKAYFYVTCDCCTLGDNDYVAGELVPVCLDDLKEKACLHPKEKCKPQPC  
YKDTKQCHSSHYYQHDTSCHDF

>gene\_579|GeneMark.hmm|276\_aa|+|540|1370 >NVVL01000018.1 Rickettsiales  
bacterium isolate NORP64 Contig\_source1382A\_10570, whole genome shotgun sequence  
MPELPEVETLKCYLEGHIIGETIASLEARRDNLRYELSPYLEQHAVLGVVSGVKRRAKFL  
IMELSNGYMLIFHLGMSGRLTMSVDYQPQKHDHIIISFQSGDQLVFNDARRFGMVYSCR  
ADMLSEQSFLNRFQGEPLIEGFDACYLLKQLAAKKSPIKTAIMDNKIVVGVGNIAAESL  
FMSKINPLTKANTLGAGAVSALVKSIRVQLKAIHAGGTTLKDFLGGDSKPGYFKQELQV  
YGRKGLPCYICKTPIESVKQAGRATFFCPNCQQNKD

>gene\_580|GeneMark.hmm|205\_aa|+|1448|2065 >NVVL01000018.1 Rickettsiales  
bacterium isolate NORP64 Contig\_source1382A\_10570, whole genome shotgun sequence  
MRKKKLIKQSTINHMLKFFSFSKAPVRSILAVLTLGIGIGVAYEEMFGIGTWHFHPKT  
DKLNVCFPPSGCGDLIAGQIVSAKSSIYMQAYGLTSKPIIQQKLARGRGVTVRILLDG  
GNLSDNESIYKELKAAHITVGFDKMSGIAHNKVIIDKKKVITGSFNFTGAADYRNAENV  
LLIDDKKIAKQYLQNWESRNKASKK

>gene\_581|GeneMark.hmm|129\_aa|-|2092|2481 >NVVL01000018.1 Rickettsiales  
bacterium isolate NORP64 Contig\_source1382A\_10570, whole genome shotgun sequence  
LIYSLIIFMQFPAVSKKIHFSFSTAITALGISLILLAMPYLFYIEYLYGAAIWCSLLA  
FEEMFAPYIDYAAKHNAILTKEVSISIGGGLSVFWMRYFHDPTILIMFSLLLLLLAHYI  
LALRIRNSS

>gene\_582|GeneMark.hmm|888\_aa|+|3046|5712 >NVVL01000018.1 Rickettsiales  
bacterium isolate NORP64 Contig\_source1382A\_10570, whole genome shotgun sequence  
MNKLIYHFGGGDAEGDMTMRDILGGKGANLAQMCKLGLPIPPGFTISAELCQIYAKRESP  
LTPNTEKELRKSIAKLEEETDKKFGSNDNPLLVSVRSGAKFSMPGMMDTILNLGMNDVA  
KALAARTDNPRFAYDSYRRFLEMYSVLEISSHLFEELDDHKKANHDVMRDSDLTVEML  
QEIEKYKAILKYTRPFESDPFKQMKHAVSAVMKSWMSPRAVVYRKINNLTAIGTAV  
NIQSMVFGNKGENSATGVIFTRCPSTGDNSLFGFLVNAQGEDVVAGIRTPSPILAVAGG  
KGDSMEEKMPKMOVRELSDICQKLESYFRDMQDIEFTIEEGKLYILQTRNGKRAAASAVKI  
AVDMVGEVVISKQEAIMRIDPELNLQLLHTAIDYSNSPEVIATGLPASPGACTGIAVFSS  
GEAEELSHHHKVLVRNDTSPEDIKGMHVSVMGLTARGGMTSHAAVVARGMGTPCVCGMR  
GVVVNEAAQTLTTPGRTIKQGDITIDGSSGKVMVGDVCLVYPEFSDEFKILEWADSE  
RTLQVRANAETPLDAKVAIKFGASGIGLCRTEHMFDSNKILIVREMIAMDYEGRMRAI  
RRLQPLQIADFKALFEVMEGKPVNIRLLDPPLHEFLPTTENDKSELAKLLNVSSSVIEHR  
LQTLHELNPMLGHRGCRGLGISYPEIYMQVRSILQAMHELDVEKGIKSNELEMIPLISEV  
KELERIKYVVKTIGEMEAESTKFDIKLGTMIELPRAALTADKIAKHVEFFSFGSNDLT  
QTTFGMSRDDIGSFLPDYIEQKILTHDPFVRIDEEGVGLIDIAIKRGKKAKPGLKMGIC  
GEHAADPESIDFFYKIGMDYISCSPYRVPIARFAAARSKIKLSKGWNR

>gene\_583|GeneMark.hmm|358\_aa|+|5709|6785 >NVVL01000018.1 Rickettsiales  
bacterium isolate NORP64 Contig\_source1382A\_10570, whole genome shotgun sequence  
MSLRDNLNKILAKHQELSDKLASGIVGEEFVKAKEYSGLETVVEKITKYNKALSLEDLA  
KEMLLEEGDAETKDMVEAELRELGAAPKLEREVKIALLPKDAADGKGAIIEVRGGTGG  
EEAALFASDLFDYQRYAAIKGWKFEILSISEIGVGGYKASALIKGDGVFSRLKFESGV  
HRVQRVPKTESSGRIHTSAATVAVLPEAEVVDVKIEDKDLRIDTYRASGAGGQHVNTTDS  
AVRITHIPTGVVVAIQDEKSQHKNKAKALKILRSRIYEEERRALDAERATSRKGQIGSGD



RSERIRTYNFPQGRISDHRINLTLYKIDEVLREGRLDEFIDALISDDEAKRLAEVSDY

>gene\_584|GeneMark.hmm|45\_aa|-|6779|6916 >NVVL01000018.1 Rickettsiales  
bacterium isolate NORP64 Contig\_source1382A\_10570, whole genome shotgun sequence  
VQPARGSSSELIVAAAALVQCVATPTARLGSPRAQLPQAQASPSHQ

>gene\_585|GeneMark.hmm|165\_aa|-|7040|7537 >NVVL01000018.1 Rickettsiales  
bacterium isolate NORP64 Contig\_source1382A\_10570, whole genome shotgun sequence  
MQEHSTVVVEEQKSMLIENLTVLGSCITIGSFEIRDIFQSFSTLTVVSETETCLLQNK  
STSVSPNISFNSETLVLLSNIPTNAQTITAEHHEALLAYLQHPPEMLKLFNPTADMISGIN  
DYTDEHLMELSNLTLAESTPVALCRIIGEYLLTEEVIAIPEFE

>gene\_586|GeneMark.hmm|172\_aa|+|7536|8054 >NVVL01000018.1 Rickettsiales  
bacterium isolate NORP64 Contig\_source1382A\_10570, whole genome shotgun sequence  
MYKDVSSLGSIKVTSLLEMLSLPDISGFFLKKLKSLSRVTELMVVKSSFVVSALQASP  
AAKGLNTTEDVSSPTISTIPTMLDLVLDIIHFPSITYLQQCAVTLDKISIFLNFVNL  
FLIKIKKTFKNLKSQKFVSVRSYVCRPKIGGYFRPADVASNLQGNIIILNKH

>gene\_587|GeneMark.hmm|433\_aa|+|8114|9415 >NVVL01000018.1 Rickettsiales  
bacterium isolate NORP64 Contig\_source1382A\_10570, whole genome shotgun sequence  
MSNIVNDSKNFFKVALLASLGSGLEYDFVIYGMMVKYIGDIFFPNHLEFISIMQAFSVF  
AVGYLIRPVGIVFGMIADSYGRKKSFILVMLTALSTLAIGLLPTYEQAGIIPILLVI  
CRLFQGVSFGAELPGAATIVSEFAPKGRGLRSLVLSSTSLGSLAVFTLSMLASNFTY  
VEITNNIWRIPFIIGGVLAVISFYIRNNITETPEFMAARRRQTGTQAGQPGVLTPLKIL  
SENMANIAIGFGLSFFLATLVIMNLYFPVYISKYFNYNLPDIYHAMTISMMAFILILFF  
GVISDYVSKFNMLLTLCAASLPFSYELLSRGGEGDLQIFFIIHQIWIASFFTSYIPI  
LPRLFTTNVRYTGVALSYNIAFSMASLIPVICAYFFQEESPFFLVGFIIAIAMAMAAI  
IALIFRGKGEYSY

>gene\_588|GeneMark.hmm|727\_aa|-|9458|11641 >NVVL01000018.1 Rickettsiales  
bacterium isolate NORP64 Contig\_source1382A\_10570, whole genome shotgun sequence  
ISCNDATANPSCANIKELEKLSNQGDALAQTYLALCYDGEQIAQDFAKAAKWHKKAADQ  
GNALAQYNLGIQYFNGKGIKDVTKAVNWFKKAADQGYTDAQYDLGVLYAKGKGVTKDFT  
QAVKWKYKAAEQGDDFAQYNLGIYFKGEGVTKDFTQAAKWKYKKAADQGCIAQYNLGV  
YVIGKGVTKDFTQAVKWKYKKAADQGYALAQYNLGVQYANGEGVAKDFTKAAKWYRKAADQ  
GNADAQCSLGIQYVNGEATKDFTKAAKWYRKAADQGHVLAQNNLGTLYFNGEGVNDFT  
KAAKCFRKAADQGNALAQYNLGVRYFNGEGVTKDFAKAAKCFRKAADQGNALAQYNLGT  
YFNGEGVTKDFTQAAKWFRKAADQGNIFAQNSLGIRYVNGEGVAKDFTQAIKWFRKAADQ  
GYALAQHILGDLYLKGEGVTQDFTQAAKWYRKAEEQGHAAAQYNLGARYDKGEGVTQDFT  
KSAKWYRKAEEQGHAFQYNLGDQYAKGEGITKDFTKAAKWFRKAADQGNIFAQSSLGAR  
YKKGEGVAKDVTKAAKWYRKAADQGCALAQNNLGAIIYKGDGVAKDFTKAVKWFRKAEEQ  
GYALAQCNLQARYAKGEGVAQNFTQAAKWYRKAEEQGYADAQNNLATQYAKGDGVAKDFT  
KAAKWYKKAQGDADAQYNLGVLYFRGEGVTQDFTKTIKWFRKAEEQGHAAAQKNLKLK  
RPSARAV

>gene\_589|GeneMark.hmm|262\_aa|+|40|828 >NVVL01000019.1 Rickettsiales  
bacterium isolate NORP64 Contig\_source1382A\_11027, whole genome shotgun sequence  
MNFSKEETLIVTKTTKTLIVPKGIKKLICIKISLETILNEGIVYVDCGFNQLTVLTPN  
SVIHLNCSYNHLTALIVPNSVIRFNCSGNQLPKLIVPNGVIRFNCSGNQLTILIVPNGVT  
YLDCSNNELTELTVPNSVTRLICSDNKLTLFVSNVSTLLYCSNNQLTQLIVPNSVTDLS  
CHGNLLEDLSKYSELIKPKVVSLYAMCHGIVNENNIPKCFSKVDKVTCDGCKNKVVKDLV  
YTSYKGYRDGYIRKTIICKKCL

>gene\_590|GeneMark.hmm|340\_aa|+|856|1878 >NVVL01000019.1 Rickettsiales  
bacterium isolate NORP64 Contig\_source1382A\_11027, whole genome shotgun sequence  
LYSKCVSYNIVFLFCVHYDQMDNAFSRTKPHRFLMCTDGLIDLNAIGLQNYILVNPKNKI  
DMISKYKIAQSCINKMDKNRPFPEVVVYSSCNDNDIDLDFKYSITQWVIIEGAFYKGC  
CCGDKMALSYNMLNFYNGNVLVVCPICKKCTNFHKTSIDLLKSVVRNCISCNKMSPFC  
DIKGGMCRNCRGRKQKGLGICATCLSEGVPYQHKRCSSCYNSNNKSFIELQTLEKSIADV  
LIDTKSLCTSVCSRSSVYKEYTFKPLCKDCYDPYKETKPCSICFKEMNFIPRWKLC  
NSCLDVRCFICESPYDRGNSNLHMCSKCKLVSDEFEKSYL

>gene\_591|GeneMark.hmm|1002\_aa|-|1950|4958 >NVVL01000019.1 Rickettsiales  
bacterium isolate NORP64 Contig\_source1382A\_11027, whole genome shotgun sequence  
MINDYQTYCYFEMPLKTVSGVPIKWSYEMANIFYKKSILKNSKHSPVKFEFKFMKTFY  
YYQPKATKPIITMWFNSTEAMKHCVNLRMCKSDGNVYVKGIGMLKCSVWENNVNIVKMM  
LIDKCKHSQWVKVLAAKVVNVDDKISKIEREFVASFSDLKVLPECDTKGLMTHPSILVF  
DVECYSDRYNSMPKSRNPLHACFMISVIFQKMGLCDTRERYMLTLGSGVEIKGTNVITFR  
FDQEKELLLKFIELISTLKPNIISGHNIFGFDWKYIYGRCKVTGVNAKEWDVISLLKNKK  
SKYVKNEWDSSTGTVMMEYIRSPGFINDTLYISRREFKLRKYTLESVSQHLLGRGKHD  
VSPKQMFIAYEENMLSEKLMKIKCGSGYHKNIARCVIDEVLRSFKKNSEELTKVAKYCI  
EDSELVIDILEKMNCWISMIETSNAVGVSIFSIYTRGQQHRVLSKVLDTSHSMGIVVDSK  
ESTIGKWNGGHVAKPITGLHDYVCCDFKSLYPMIIYKNICHSTLVLDKSIPDSDCNIC  
EWDVDSNGKKWKFRYIKQEYKGVLPPTLERSLLSARQNVKDMKVEKDSIYRIVLDRQAG  
IKVTCNSVFGSLGVRVGGKLSLPEGAMSITAMGRNDIITCNYLENKGFVVIYNDTDSTF  
SKYKNTNDKLTQVEIYRLAVQWGKDMAKELTKLFPAPMSMELEKVGRMFSIGKKMYTFRE  
VCMYGTNFGFEKHNDDIMFKGDVIARREASPWKRETYKKVLIMILDRVPFKTIMKSYITN  
MYNVFKGDVEWECLLMSRRSRSIYKSKSAFMKVFSRDLSTIGINVEKGDRLEYLILEGK  
GNLGSRAITSDLYKEMTKTGNMIESFSVTCDIDKSYIEDSENSVMGIIGIAFSDDELHKI  
TESNNLEDCMLVINEIKKRYNQLSNKIDAMLSTNDPEYVLTVLNKSNAKIVTECRRAKVS  
GRYIFNRLTSPATKLSKAYKLSEDNLEKTYFNMMCVLDKL

>gene\_592|GeneMark.hmm|257\_aa|+|5229|6002 >NVVL01000019.1 Rickettsiales  
bacterium isolate NORP64 Contig\_source1382A\_11027, whole genome shotgun sequence  
MYSVVAKGNCLSKINDIVWAKGAVILNEFTRKSLICKCKNTHEFTISIKDVLLGKWCTS  
CITCRIQGNQNLNMNRQLVCYKYSNILISRNGEMISTYNNGKTKVRVRCSSNHVTDLYV  
SQIKNKSWCIICKNKRYTGKYKIRASTTKPKTNILLSKFVNTDVPLVIKCKHGHEFTNT  
ANDMISKACPCSDEFGTMDNEISIVENINRRGILLSPYVSENVILCLQCEKTHTFKLS  
PINIRKGHWC GDCEK GK

>gene\_593|GeneMark.hmm|185\_aa|+|6361|6918 >NVVL01000019.1 Rickettsiales  
bacterium isolate NORP64 Contig\_source1382A\_11027, whole genome shotgun sequence

MTNFQLKYFREFAIMAFERKCELISTYINTNSTIRIKCKCGYTMNIRPKTIRTGKWCRVC  
ERRSANRMMNAHPLNNIYFSRDKKDRGDQVEEMFTLVMGDQVEEIDTNSSEGINDAKGS  
IITREYTNKEMFIVENINRRGGILLSPYSNEKSLVSIQCTNRHEFEMYPMNIRRGYWCKV  
CEK GK

>gene\_594|GeneMark.hmm|175\_aa|+|7049|7576 >NVVL01000019.1 Rickettsiales  
bacterium isolate NORP64 Contig\_source1382A\_11027, whole genome shotgun sequence  
MEFKTEEILIVNKRMETLVVFPFGIKKVICVSLGLKVLVLSDACVHVDCSNNNLGFLHIPP  
NIVYLDCNNNKIRFLNLRDRKHIEYIDCYDNELEDDIKVYSDHLEHLCCCTNNIKKITLSY  
SKVLTVNYDGTLLTTNTYNDNTLTKVKCSIENPHSEKLSNIFISSKNKTKVILS

>gene\_595|GeneMark.hmm|116\_aa|+|7661|8011 >NVVL01000019.1 Rickettsiales  
bacterium isolate NORP64 Contig\_source1382A\_11027, whole genome shotgun sequence  
LTASSYDVKIETFTFVNEDKALVRSIRKLGAFCKDVEFHKTYVPLVHGIDSLITLKYD  
YVTENNGTHVNASFVLNIGCIYISCGGVKVDLESIKQDITAMFEFRYDVVAKQVY

>gene\_596|GeneMark.hmm|257\_aa|-|8041|8814 >NVVL01000019.1 Rickettsiales  
bacterium isolate NORP64 Contig\_source1382A\_11027, whole genome shotgun sequence  
MGANQVNVSKSTQELQNDILQVTEENCHAKCTNYDGGGTVIIDGTNIKGDLDIVQQCTAS  
ASCTMNQTLQSQVEDIMSSISKQSQKSEQSFINFISNQADVSEIKQNITNSITQIMQSS  
CQATSDNIQKDNIVILRNDTVGGDFTLGQKGSASSNCILNNVAKQVLFNKQQAQDQSQT  
AENVLAIIVVAIVIGIHALGLFALFFFGKKILGSSSEILESPNSGEKGVGNTKKKSSGL  
FSKIGGLLEADPELLL

>gene\_597|GeneMark.hmm|690\_aa|+|8866|10938 >NVVL01000019.1 Rickettsiales  
bacterium isolate NORP64 Contig\_source1382A\_11027, whole genome shotgun sequence  
MSRKVRIVGKVKVVISRKSFDIISQKSSFYCYTHDFDYLPMLVGDVAVIVKGDYVDSVL  
TLDQYPMVVPGENKEAVVGYMRKGFYKVGVSKIENIVSEVSSKYGSCIDYISNESQSYK  
IETTKTIFSYEKTSYSYVNSVRVSDILSSGNEGHDKNMIKWWYNNITLRRYLLGLNKRT  
INEVEDYSLNQMYKILLDNPLRIVELDVPLCIKILKRTENSVTKKQIHQGKIARLIHKYR  
KDGWSGVPMSKVKLSCSDIDEHTKALVTDYKIVIDESSDEIIYFCHQLKLENKVASEFN  
KRIKEKTLNIDVKYRMDTLDVDQKKAIRMAINNQISIITGPAGSGKTIVIGEIIINLRLR  
DISYEVVSFTGKAVARLQEVTDGKEALTMHRLMARGGPFKHLIIDEASMVSTKLMGTFLS  
GCGGNYKITLVGDVNQLLPIGWGSMFSESISMCIETTRLVNNYRSDDDGININSTNIIK  
DKGIDIKSYENFKLINGDMSDIDKVLKQMEDVEDFDKNNVTVLTYPYKNLENINKKLRTK  
FTNNTSDMFEEGDRVMMTQNNYEINVMNGEEGTVTGKYADYITVKFGGTTTHKFVLESRKE  
SYKDLVTTGSLVMSYGMTIHKSQGSEWKYVICYIGESYANSSFLSKNLLYTCITRAMKAI  
WVIGSIGDFRLGCSRDPYSYRHDLHQRLLS

>gene\_598|GeneMark.hmm|122\_aa|+|183|551 >NVVL01000020.1 Rickettsiales  
bacterium isolate NORP64 Contig\_source1382A\_11070, whole genome shotgun sequence  
MIFVLLYIEYSSHDCARGKQCSHNIIDNDNVGSDSIDKIVEMVKKNTVYTIWRQSVIVGL  
ISSLLVPYYTHQSLPSFHEWTGILLVSLSTYLSSSWIWSHFSPNSKEIIRLESLSQI  
VG

>gene\_599|GeneMark.hmm|500\_aa|-|594|2096 >NVVL01000020.1 Rickettsiales  
bacterium isolate NORP64 Contig\_source1382A\_11070, whole genome shotgun sequence  
MSKYLDPEINDAGIIFIQRNDPISTLAMISISKEYSSMGFYKTNASGRSETKVLYVEV  
LKMHRPKLGESGATIEDLVSDDLVTLSSIKLRPSIVDGVIDEIETRKIQEYFRIAIKV  
TSNESKNTSELVYQLLGYRDKSDVKCLSIMEMVNEVVKLMGRSSDVPLQSSKQKLGIKT  
FHNSKIDGGIEGKFGGLISMFGSSFSQSESDTNKPIHSYSKDNELFGELLNILKLPDRIP  
DVKLAKIREIKIYQPILIKMSTIFIDMLLNNQRFFDTLSKGIVQDNVSIIVRGFSDDFT  
KLFTLISQSVKSGSLEYSKLLCSSIHNDRKNILGKGCESLIQTTELPVSNILINNVN  
KCGNNSRRKLVSSLSNLYDHVSYIKNSVDCDSECLVDINLLSSIVNNLMEVSSLRPRIC  
NISGDFERECKINVDNRCGTIYPMTMSSGKKIVLNTRYPNLLCYSKKELSEILRSLDNVS  
VEDEDMDSIRAMLTDILASS

>gene\_600|GeneMark.hmm|171\_aa|+|2259|2774 >NVVL01000020.1 Rickettsiales  
bacterium isolate NORP64 Contig\_source1382A\_11070, whole genome shotgun sequence  
MQVPHVDRFKKNVHDMVDLIGDIIELSEQGNKRNNKITLNVAGLFIKSYDKEKLIDHFIL  
ESYKHWETIHKRDETFFLKNAISVFGKLPEDNVNTFKKLFADGDISDEDKGAIWDFDIS  
LVKICIKYIHSVRLPKTVLVGGEERNVYSNKKYSSVNLFSFSTLYDIKLVW

>gene\_601|GeneMark.hmm|792\_aa|+|2768|5146 >NVVL01000020.1 Rickettsiales  
bacterium isolate NORP64 Contig\_source1382A\_11070, whole genome shotgun sequence  
VVGNYEWYIFIWDYQMTTIVTKNDRKLRTVISAVENGISINGTTIDIGTPGITKIHKALIS  
QQNGVHSDTLVQYYSRDDFSPDLIASCYSVENSVAIHLVSDNVNEILSRTNIYPSLNE  
LEDIMSGNTYITMDVTSFMKDNKYVGINLKVVTSGDPQRNWDTIFGTAYGSNIFVLHHTH  
IYDNVLIGMIAKSMNKFVSIVVVVPAKHLEKYKKGATGSLPSTTSRPRVVKTKPKPKRVV  
KTKPKPKRVVVKPKRVVVKTKPKPKRVVVKPKRVVVKTKPKPKRVVVKPKPKRVVVK  
EPKHTRAVEVSANIETHAINVRKMYEESLGAGGDGKFTELYKYYTLNIEDIFKPENGAIR  
AFGVDSKPLVNSSDILDTLHGNLNVIVLIFLTTIGMVLKDKDCTTIENGKDKHKKMRLDLY  
FGDDKKQTTKRMINLLHIGMKTQNSMVEAHKPGAWEDFVKINESFRVLLRNLMGKLTLY  
ESDDDEYESNDEYESDGKALKLKEYASVIIGLFKGNKASKYSQIYEYFEANIDLMFLGDN  
FGEGDLSGVLDALGSNINNITIIIFLATIGMVFTKNKATIEDGRDRNKIKRMEKYISSSSA  
KKTPEIISYIEGISMNKNLAEEFGKYNPNKSWTVLPSVVVLLKQLHGKVTVKYLIGDF  
EEKLFLHVEKLNDAQIVEDNCAEDAGDMFEYIDANIKSIANGSRVISVANRYSDKEIQNK  
IFKVLKSVETISEYFFKSIRGGLDDEADLRVSEFMRLHKELIGSFNLSRNTNKFQLFV  
EFAENFTKKFQT

>gene\_602|GeneMark.hmm|123\_aa|+|5165|5536 >NVVL01000020.1 Rickettsiales  
bacterium isolate NORP64 Contig\_source1382A\_11070, whole genome shotgun sequence  
MSKSPNPLKIISKDLTDVMGLGNYITFDGMAILTFDMLVQWWTIYVSSNELMDDKGNIFP  
NSIVSYVMDFRHRNSFNIIKLYDRLNNTESFDGTLTDSQIKDIKDYEKYLEELYESYT  
PKL

>gene\_603|GeneMark.hmm|452\_aa|-|5518|6876 >NVVL01000020.1 Rickettsiales  
bacterium isolate NORP64 Contig\_source1382A\_11070, whole genome shotgun sequence  
MIRDKISEILGVGNDVWMIYDYIQEDGLYMLGMNKTSVDNMYGFVEGLVVDINYMKIICS  
SDGYKEIFMLNEITPDAIGNIDLVSFVGTKKTVNVKGLQVEMYPDGFDIRVFKYRGIVYH  
ISNTKLSLNYSECYNKNSYDDLYNYFEIPDSDILEDRCYKFRIVSKDTLHVSKERINEPY  
MVYCGVLGEQFPLNLSKYDRVFDTESLSVEDTNDYLFSGYYEIDDSLDVRLLPGERVQI

KYTNKYYILESESYAWRKYVRGYEKDLYERMLQLLDVTHADTTINNPITNYPKMSTWDVK  
GIMDEVSNKNIITWPGDSYIPKSSEYKFYNVWAAFLMSVPLHSQANVSKFYNKIINDMS  
NVIKWIKELSVGKIPDMSSENSRYQDCRNLDNFVNKILSSSKDKALDIKDMYVVESFQD  
RINKFIELEVLLSGSALSLLIKDMNCNYSLGV

>gene\_604|GeneMark.hmm|366\_aa|+|6989|8089 >NVVL0100020.1 Rickettsiales  
bacterium isolate NORP64 Contig\_source1382A\_11070, whole genome shotgun sequence  
MDQNNISIRLWNIEFDSKCLVTKYGMLNGKIQSASVEIYSKCNRTLDEQALLEASNKYNKK  
IRNGYGVVDVNACINSCNTLQLANKYIIPGSLTAKGNAIASNVKCFPVLLQPKIDGIRCKA  
FMKGGNMLMSRNNKKHSFLDHIEDVRRRISLVGNRTLDGELYNGDMSFVNIQSSIMCS  
KTKSPSNEKIQYWIFDVEDYTLVDKSRLLDKAKVVKSHIVFVPSIEAVSHEDISKKH  
RGYVIDGYEGTMIRHIAKEGSKYHKMSLYRGKRNNNLLKHKDFLDEEGEVISISEGRGKF  
KGAAIIRLIDPRGNELEVTPKGTFEHKTELYTNRNKYIGKLYKYKYQGLSEYGIPRFIG  
LYFIEK

>gene\_605|GeneMark.hmm|92\_aa|+|8108|8386 >NVVL0100020.1 Rickettsiales  
bacterium isolate NORP64 Contig\_source1382A\_11070, whole genome shotgun sequence  
MERQNLSSLSRGQATGMYGGNTNMFVLWFVLLTAVVWFLLYTIKPSFIQKKDSSGETTG  
ESNNGKAFLWSLGISAVLLFILWAIKQSSMSY

>gene\_606|GeneMark.hmm|179\_aa|+|8425|8964 >NVVL0100020.1 Rickettsiales  
bacterium isolate NORP64 Contig\_source1382A\_11070, whole genome shotgun sequence  
MSYTLPIITSIDDRPLHHTVRKSDTLYDNNTTKLIQCXYLFSTVLWILLVKSLGIYNGEY  
MGLLFLSIPVIVYMINYVVGCKEITKDVEQHMFKGNFLSFGYLIVVIFMNWNSSIERTKFF  
KTLVISIILLMLSLVDLWVCESSLILSSSLKSIFQTASLGLLSYSLYMYLDNRNKTMA

>gene\_607|GeneMark.hmm|356\_aa|+|9178|10248 >NVVL0100020.1 Rickettsiales  
bacterium isolate NORP64 Contig\_source1382A\_11070, whole genome shotgun sequence  
MNFSEETLVVTEATKTLIVPKGIKLVCSGIGLETLILNEGIVVDCQNNKLTCLVTPN  
SVTRLYCFNNKLTTELTPDSDVTDLYCSDNKLTELTPGVTRLDVSYNHLTKLIVHNGVTD  
LDCSGNRLTILV PNSVTYLNCS DNKLTELIVPNSVTRLYCSYNELSKLTPNGVILLHC  
SCNHLTKLIVHNGVTDLYCYGNKLAKLTPNGVIYLNCHSNVLTVLIVPNSVTHLYCFNN  
KLTELTPDSDVIRLHCSSNLLTELIVPNSVTCLNCYGNLLEDLREYSELIKPRVVSlyTM  
CYGIVNENNVPKFFSKVDKVTCECGDKVIKDLAYILCKGNVEGYIRKTIICKKCF

>gene\_608|GeneMark.hmm|205\_aa|+|10371|10988 >NVVL0100020.1 Rickettsiales  
bacterium isolate NORP64 Contig\_source1382A\_11070, whole genome shotgun sequence  
MNFSEETLIVTKATKTLIVPKGIKLVCFVGLLETLILNEGIVFVECCHNKLTLLIIPN  
SVTRLDCYDNKLTVLIIPNSVTHLRCSNKLTELIVPNDVTYLNCCYNELIELIVPNSVT  
DLDCSGNLLDLREYSELIKPRVVSlyAMCYGIVNEKDIPKFFSKVDKVTCDGCKNKVIK  
DLAYILCKGNVEGYIRKTIICKKCF

>gene\_609|GeneMark.hmm|978\_aa|+|1|2937 >NVVL0100021.1 Rickettsiales  
bacterium isolate NORP64 Contig\_source1382A\_13643, whole genome shotgun sequence  
NFSFEVLRKPACSHKSASVEDLVTSMMIPGSGEYVYDTKIQQKTILTPHGAEIETTDVN  
SHNYHKIANSVHSLNQLQQICKNTEWVSPVVCWFGDNINARDCLIKPAVEFKDTKVAYSE

EWRVGGYNRETAYEITKDAFDRPLYGGSVNDASVVRYLKELKSRNLKTMFYPMFFLDVPPQ  
KPWRGHMTTEPEYVRDFFQKEHGYNDFILHYAELARDHVDAFVIGSELIGLTSIRSGDNF  
PAVDELVALAQVKQIMGDKVLVYAADWSEYHHTTGGWFNLDPLWASSGIDFVGIDAYF  
PVAPAAGSVITKEELEAGWNSGEGYDYYIDQSDSKHPLAPEYAWKNLRYWWENPHKNPD  
GALTEWVPRSKPIWFTEFGFPSINQATNQPNVFFDPRCIDGGVPKGSNGNIDFTIQRAI  
KAFIEYWKTQEYIGQMFLWTWDARPYPAWPHMRVWRDGNLWEKGHWVNNKFGTSNLGAIL  
LEISLRSQINLDHVDVSTLDDTIEGFVLSNQMTAINAIDMLRASYFFDICGANQEMISFI  
KRGSAEELSVSSSECLKLSDNSFIEEIEIPKEVTLDKVDLYFIDGSKEYSTNYIYVNNET  
NSYTDKATLRTLPLVITEAEAKIMGELLLENASIEDKIISFILNKQDFKLPKPTDFVSFKHA  
GREYSIRVINTEIHGNQMIVTGIVDYRDFYLSVASAKNQLTLEYEHSEDSNLVILDLPFI  
FNNARAPYLAAYLCNNASAPLYSKLPHDLHGNWSRIASLEPTNALGTLVEFIQPRHVNMF  
MIDETSKLIVKGRRLKYALGAQQLAMIGGEVITFRHIEKLQDGLYKISYLTRGGMGTEN  
LMTNHAPGEDFVIINAGMGMNMISVSKKLIGKPVIFRACSIEKSMIYENKAQSPLPPFVT  
YEQISGHELHIKWVTRSRHYNQWDEPAGAEDSSFTVKLHLNANGDAAEYQSLTWEIIAI  
SALDLSAGYSVDIIKGGN

>gene\_610|GeneMark.hmm|245\_aa|+|2960|3697 >NVVL01000021.1 Rickettsiales  
bacterium isolate NORP64 Contig\_source1382A\_13643, whole genome shotgun sequence  
MQTNNFDMELMVPQGQENKDVTFNESLLKIDSFLNLSVNGFRDEVPDEVPLGEKYIITNGE  
YQHHCYSSHESKGVQYFRPKQGMVVSFVQAHSFMLYHEHNWVEIMQAAHEPPREDGAMV  
GGAVDAAVVADDADAVNVGGAYVDDNFTGIDDEFIAPPNKKHFSLYLNSNTTLNFDNVLF  
SEVTILIKQCYNAARSLTWPHNILWPDGSAHIMSEAPNAIDIVKLYRMPESTHFLGKIIG  
QNYQF

>gene\_611|GeneMark.hmm|148\_aa|+|3792|4238 >NVVL01000021.1 Rickettsiales  
bacterium isolate NORP64 Contig\_source1382A\_13643, whole genome shotgun sequence  
MVTLLASIAGFLTSIPEIKYFKDMNDKEHELSILEIQMQYNRDNDARSLEEIYVARDI  
LEQASLYATFESKIWWVDMLNGSVRPVLAYSFFIMYVAVKYLQYNAISASAHIVEHIEII  
WNIDDQAIFASVVSFYQGQRTFRRSYRT

>gene\_612|GeneMark.hmm|154\_aa|+|4201|4665 >NVVL01000021.1 Rickettsiales  
bacterium isolate NORP64 Contig\_source1382A\_13643, whole genome shotgun sequence  
MGNEHSGGLIVHRCITKEGIELIKIFEGFSAKPYICSGGHLTIGYGHKLLPDEPTEEISQ  
AEGILLEQDLFRFERAVVRYIDNPLNNNQFAALVSFSFNLGAAALQRSTLRQKINYGLY  
NEAANEFKWKVYADGRKIAGLVHRRIVEQELFLL

>gene\_613|GeneMark.hmm|194\_aa|-|4690|5274 >NVVL01000021.1 Rickettsiales  
bacterium isolate NORP64 Contig\_source1382A\_13643, whole genome shotgun sequence  
MPIGRTNSRIASDFILSGIVVKKELSDNITQTLQGGLALKSYAAIWENFNHEQVGNIVEA  
FVNHGGKEVWNLMPALLTPNSTQEIQIGVIFSPKYQSLEFIRICAVVATILPPSPLKSYAL  
QQAQIILARDHSAFEFEALSNOVALLGASKEMAHVIFQFVVGDVVGIRDEVHELIDLELE  
QLQPAGVVIEEVAE

>gene\_614|GeneMark.hmm|59\_aa|-|5772|5951 >NVVL01000021.1 Rickettsiales  
bacterium isolate NORP64 Contig\_source1382A\_13643, whole genome shotgun sequence  
LLEDYSSFFELHNHLPVNOGALASKTVSLKKAQEVAIILSSSNPEETIQNRVAYKAS

>gene\_615|GeneMark.hmm|94\_aa|-|6080|6364 >NVVL0100021.1 Rickettsiales  
bacterium isolate NORP64 Contig\_source1382A\_13643, whole genome shotgun sequence  
MGNNSQLRDTASSNAESVVKPGTVTTELDRASLRKSVGDDLPGDSKNEDNEPPLLKNLSP  
FEQAIYNLNQRENTLGLDLELVSGQMTIEGTSGE

>gene\_616|GeneMark.hmm|689\_aa|-|6846|8915 >NVVL0100021.1 Rickettsiales  
bacterium isolate NORP64 Contig\_source1382A\_13643, whole genome shotgun sequence  
LRKFKQASIVGTSGIGKTQLIRTFAYENRSNYKVIWFVDCNLNLNQEFIKLAKELNKNNG  
ANIKEGGNLVKEKVLEYLQKKDNWLLIFDNLKGIGENKKVQDFINWEHNGHVIFASQDKEN  
LPYSIELTKFNRNDSIILANNILESSSSEQEEFLAKSFGNGYPILIVQAAQLLNQVPGLNF  
KTYKKQVLRSSNKLKLNIALAISEFTPTAVNLLYKMALINNQAFSKDFLSYITDNKTSLE  
DDIFQISKFALISNISSSEQNSIFEMHDIIAQTIIDMNGRKKSQDVLEKLISNLLKSVPR  
SVTDFHVFRRSGKTIFENFKVISRYTEEYPISLFGTMGLSLYLMTQYNNYSYDYEAAEELVK  
WFNEREDINKFNPSLMNNDERARYADFLQSLARHYRNRHFDFDKSMKYAMKAKEVYKNVE  
GYESIKADLFYQLASNEIKVGNMKSAEQYIVKLNTPFINNVESMLFFLKGDYESALNRM  
SLLIKIRLGKIKADDLVLTSNYLLRAKILNFLGRYQEAYDQAKQIYNMHKFKKEDHLIF  
GRIFAELARSELGLGKIADALEHIKKSISILKNMQQEKAQKARFLESAYLARSYVVQGEI  
FMKQNCFKDAIEFYRAAQKIYFYLYKNNMAHIEHVSYLHLQGAKAACRAGDLYHYKTFG  
PQVRGFGQEHPTIAMFKYCGNYNMNLWQ

>gene\_617|GeneMark.hmm|243\_aa|-|747|1478 >NVVL0100022.1 Rickettsiales  
bacterium isolate NORP64 Contig\_source1382A\_13955, whole genome shotgun sequence  
MNFSKEETLxVTEETKTLIVPKGIKKLVCSDIGLETILNNEEVVYVDCPYNKLTELIVPN  
GVTFLNCSHNQLSLLIVPNSVTHLDCSNNKLTILIVPNNTTHLRCYDNKLTTLIIHKHMT  
RLNCSHNKLTTELIVPNSVTYLGCSGNRLTELIVPTS SVVRLFCFYNLLEDLSKYNELIKPK  
VVSLYDMCHAMVNENNIPKCFKSKVDKVTCDGCKSKVIKDSAYILYEGYHEGYIRKTIKCK  
KCF

>gene\_618|GeneMark.hmm|391\_aa|-|1605|2780 >NVVL0100022.1 Rickettsiales  
bacterium isolate NORP64 Contig\_source1382A\_13955, whole genome shotgun sequence  
MRRGMQDTGIYIVRCYTCMKVLSPPYDYSDLIGDGVSPRTAIRLIKLGNIINVGVESEI  
TGEYITKLFANDLDITRYNRLIKGTTPEEALELMKLSHILDIDHGSSSNEYIAGLFRFN  
NVFGRYKEYIRISNGLNEFDVLDLMDGLSDKFESRFTVNNMVNFFSSIDSMKRYEDYLKI  
LAGLNASEIMKLMGLGYVLDNSYKHKNTNSYVKRLLVSSGMPGKYKQYIEIVNGTKVHKL  
LKLLGLEIYILDTPGCIITSYVTKLFKENKVEYAFDSYIECISGEMNTRKALDILGVKR  
ICCRMRVMSQAKIPLGRALNRDDGRVYETKPLEISRAFSNSSRMTNKSLLLEKFSKINVP  
LFSDDPPVRNANMAGKIRTPREGTLREFKTN

>gene\_619|GeneMark.hmm|227\_aa|+|2852|3535 >NVVL0100022.1 Rickettsiales  
bacterium isolate NORP64 Contig\_source1382A\_13955, whole genome shotgun sequence  
MVSVEYVMIVIVALIVLVGLLIYHFAFRKHGNIIEGEPCKDPCAACHYCGGDTKCHSG  
ISGGGSGMECSISAHCSGLTCVDDKCGTGSSQDNHSGSFTNSSITAIIDGKRYLTLS  
ATNDDDEAVSIWEKDEPNHKYSYSSSTNELSSSDSKLMVNSFGFIKEGPAAKFYFISSGG  
EMRMEDAFANILSLDTRDNTAVFKDPPRYTSQSTGPTVKGIVIKVVK

>gene\_620|GeneMark.hmm|367\_aa|+|3573|4676 >NVVL01000022.1 Rickettsiales  
bacterium isolate NORP64 Contig\_source1382A\_13955, whole genome shotgun sequence  
MENDDDVIDYIDLPLEMSCKIVEKITEIADVILKEDERMGPLMMEYGRTLRQLGGFKMY  
NINLIQGMRMSLYVDENILISVKTVLEANMLSTLAPGVSVTIVILSDNFTESELEIAKAVV  
DNYLTKSITKGSVHRNMRIAIFRNIDFDISDDSGGDFILINKNKMLIGTSLYRDVALVALS  
IINKLDIQMVSVDHENIKGLSLIVGNEIYLNTDMIYDFSRSDLGCLDQSNPCLKDITILG  
FNGTYSEFPDRLLTIYMYNNGFLFHREETDEFLLTSDTLIHRMIERDEYINGNKNKNGKID  
TTLNIWSSSKNYESLMDIFAKTIFVNSKDIMIKELTIKIPLEFLNAHEMTDDSIHIEQS  
YLEIFEG

>gene\_621|GeneMark.hmm|632\_aa|+|4711|6609 >NVVL01000022.1 Rickettsiales  
bacterium isolate NORP64 Contig\_source1382A\_13955, whole genome shotgun sequence  
VIFKENSVSKMEDINIFDGRCKTKHLLRILELVKTKDLVSIMNPIGSGKDIYIPLILTK  
IGKVLVSFNTRSRELSLNCYLSKYTDVGRSLDESTYNEKTSVICGTSSEVRDLVSSNSSI  
YFSREIIIIGGLDTSLVNNIITVAIWRKKIKLSSTSPRMVLSNTSPSNMLYKSAADYNR  
HTLVDVSSYTVSVIENFDITYDDSYGPGSYMMLTKIAYILSNVYENVTKSTLVFLTDLP  
RINRLVDLISEVVNASIVTNPVDEPGDESEHNGNVVYVDDMSSSSPYIGNVDFVIDSMS  
RTRGREVVYIDKRTAKMRASRLNTTKSPVCHRMCTKRVDLLNGWDDSKMSSDDMYDLIV  
GYKENGIDLSKINNQNGKSITEANNSFILGSLTSRDEITEKGFIRESHMSRRCSSMLW  
ECMKKEYSKYPIYACVCLISLIDSYEHGYFKYPKRLDGERTVDYFNAVTTFKRRHHAKFF  
GYSDVGTLLIMWLDLLNNSIDRESVKIWALENKLNMEMIINVYDSTNKIMESIGGEHIKY  
FEIKDVIDRMRPIIINAYTDRCLFLENGNNTKYSDNYGNFYFDKLFNYNTMIVNPPKQL  
VCLYFDDTKIGPGRIMKLSLNADDYVIKYFEH

>gene\_622|GeneMark.hmm|300\_aa|-|6639|7541 >NVVL01000022.1 Rickettsiales  
bacterium isolate NORP64 Contig\_source1382A\_13955, whole genome shotgun sequence  
MNFSKEETLIVTEATKTLIVPKGIKKLVCTFVGLLETILNEGIEYVDCSSNQLTELTPD  
SVIRLYCSSNELTKLIVPSSVTRLKCFNKLTELIVPNNVIHLYCSRNLTKLIVPNGVT  
CLYCSHNKLTTELIVPNNVTCLYCPYNRLTKLIVSDNVTCLYCPYNRTELTAPEVIRLN  
CSYNQLTELTPNSAIRLYCSYNLLTKLTPNGVTCLTCHDNLLEDLSKYNELIKPKVVS  
LYDMCYGMVNENNIPKCFSKVDKVTCDKVIKDLAYTRYKGNVEGYIRKTIKCKKCF

>gene\_623|GeneMark.hmm|319\_aa|-|7643|8602 >NVVL01000022.1 Rickettsiales  
bacterium isolate NORP64 Contig\_source1382A\_13955, whole genome shotgun sequence  
MNFSKEEILIVVGTTKTLIVPKGIKKLICSKIGLETILNEGIVYVDCSRNLTKLIVPD  
SVIDLNCSDNKLTVLIVPDGVTYLYCLSNKLTTELIVPDGVTCLYCSNNKLAKLIVPDGVT  
RLYCSSNELTILIVPNGVTHLDCSNNKLTCLIVPKSVTFLYCYGNQLTELTPDGVTFLN  
CCRNHLTILIVPDNVTNLDCSFNKITELIVTDGVNYLVCSFNKLTTELIVTNGVDYLVCYD  
NLLEDLSKYSELTKPKVVSLEYAMCYEIVNENNIPKCFSKVDKVTCDKVIKDLAYTRYKGNVEGYIRKTIKCKKCF

>gene\_624|GeneMark.hmm|28\_aa|+|1|87 >NVVL01000023.1 Rickettsiales  
bacterium isolate NORP64 Contig\_source1382A\_14627, whole genome shotgun sequence  
LSQFGTMLLKGFLLPEIQDYRLFYLLR



>gene\_625|GeneMark.hmm|65\_aa|-|84|281 >NVVL0100023.1 Rickettsiales  
bacterium isolate NORP64 Contig\_source1382A\_14627, whole genome shotgun sequence  
MRIVDDAAEPTQAQMEDELKSAPVASLSIHQPTTAVTFSPEQVLQGMAARLANANITLG  
TASSS

>gene\_626|GeneMark.hmm|395\_aa|+|791|1978 >NVVL0100023.1 Rickettsiales  
bacterium isolate NORP64 Contig\_source1382A\_14627, whole genome shotgun sequence  
MAIFSPHTSIVQMSRREIARDYLKKGRVVYSKIHVPAGILEDSGKGLDAGIGRKPQGVYDG  
SARYMKSAELRALNEELAKENARAIWKNPELVFEYLPLDNPVFTKEEIGAALLEALHKDL  
VIGEVADEKLIVGLEKNLARRCMVLEARIFSSDTLSLVTKCDLRGRALYTQTKRVELEER  
YTKTIKELHGRSNHSLYLQDVLDDHLSIREWLAKHARSGILRFTQKLEQKIGLKLNVASS  
KQRVLSPEQRKAVVGILNGKDLSSLQGLPGSGKTMLAGVIARQYKKAGKKVIGITPSDAA  
ALALAKETGIECRNAILWRKIWLDEKWRGRYGEFQPLRMDYKEDKFQSKISNLTKNHV  
VIMDESSRMDLINMDFILSEVRKAGAKIIMLGDN

>gene\_627|GeneMark.hmm|311\_aa|+|1994|2929 >NVVL0100023.1 Rickettsiales  
bacterium isolate NORP64 Contig\_source1382A\_14627, whole genome shotgun sequence  
MAGGFKKSIDICGSETLVEVRRQNNPADREAVKLLSQYRTHDALTMFEETGSIIIETEL  
AADSRLVDDYVEAYTKKAEELDRSNHRVADSLVCSHTNASVVKFNSEIRERLQKNGILK  
YSKVGIVGLFRRKGGVNVGNKRMELLPEQIVFTGNLNYEESDVFNSEVGTVLSVNWV  
DKQGFYIAVLVKNKADGSLEQVLDTKKLESEYPGSILDYGYAVTAYKLQGATIDQTFIRH  
GSNIGYETFNVMSRHRENVWLYADRKTLHDALYATLDKNIVKARYRYNLEAKPGQNLDM  
LGLKSHIINSL

>gene\_628|GeneMark.hmm|1779\_aa|-|2986|8325 >NVVL0100023.1 Rickettsiales  
bacterium isolate NORP64 Contig\_source1382A\_14627, whole genome shotgun sequence  
FNEQDES VKTLLNGGDTDISGLEGYSGYKICELRDGLLNSSDQLNQESVEPYEITAAQ  
TGEDKLLSAFVSKELQINYDSDSDTPEDEDERYDALMCDALWRAAFNEQDES VKTLLNG  
GDTDISGLEGYSGYKILQLKEAMSSQRQVLEQLRIDLFTAARSGRNLELLSELVQGKL  
GFSESELQKVIEDTIEIAAFNSQQGALIRLLEGGNIDVSSFREHMIWDIAIQALDKVDEE  
QSVAGNEIHTTLRQDAVTQPTPTGLDISTMNLNLVIPTLDEFKQHPHPEGVDPALLQQY  
GHEAKIPEELLAASSPASSAVPSSAVDFATTPAQISSDPAAEEKQKTLALIRDYYQRGLEL  
YHSGDSANLALAAQELAQALRPTLSKPSMRSLHVNIADVKEELDSMYHLGKIYLADSSY  
PDHHSKAAAIFQYACAGFARKHFTEEYFAQQGGVLTIAATSADDRKEFPSAEAAAAYFTNQ  
AYLVENQFLVTLHSNMPAVTLINAEDTKAADLYCSSYHQQISGYKDSLQIRFSTQDKLE  
EISDLTVVDIAQRAAEVAKIYSDVTRFFVRHERDVLHQDAQHQAPQQAAPPQVQQLLI  
ECYEQLGAPPEGCEYAIVSLGSLASGTMTWPWSGLEFAILINEDNESYREYFRNLTKLLHI  
KVINLGETPLRNVEIESLNNFKTANEADEWFQDEVMSGFNFDGSDWHARKLPFSQQGQQ  
AENELDIEITIISDKPDYELILTPGQLAMLQREVGHSLSLTEPEHDLADSTPPDSSTEST  
PGSESTESWVSSDERLVQALRSISLIDGSTRVDYETGQEFRTGQGLLDSYRAHLRDPEIL  
APQILQERAMHILQEDVSKFSLKLSDEKKNLVDVKKDFHRLGEVIQALSNNYNNILAKDD  
SPAITIWEMIDVMEIRDNPILSPVGAQHLREALGIATELELSSYPNNEAQGEWMSTYVPT  
VENLSKEQRQQLVQQTFFHIKDTSLHFFYYVMSKVRTIMDGFSKEESREVAERTLVNDL  
FDASNYNKG MVHARFIEYDQALGYLKIakteapesfELLKNLFLVHQKMKATEDALAVAE  
KMLRLSQAQHPDNPNDLAASYNLSGNAYDLKGN YDKAIEYHDLALTIRLQAYANSLSH  
PEIAASYNLGNAYNAKGEYQQAIIYHKQALAIRQEAYVSNPNHPDLATSFNNLGNAYER  
KGEYDQAILYHEQALGVMQKAYTSTPHHPDLATSFNNLGNAYEKKGEYDQAICYHDLALT

IRLQAYANSPSHPDIA MSYNNLGNVYDSKGEYGQAIYHKLALAIKLEAYASTPNHPDIA  
ISHNNLGNAYYSKGEYDQAYEHAGKAVEIYFRNHHQQHLAIKSVYDQIVLQLGNLALLD  
DSAAAAIEYYQQIDPNYEHIVFESEEFVRLQFEHAAMAYSSNALQSALNCQLVLVKIDPG  
LRHGNHYHNLASYAYLGHIEKANITFTDALAQPPAKVTGRLHVEYAQFLIVNRDNEALA  
TSVQEISPHLHAAISSDNMSDLPYGRAEKDSVCEILQNLLSQRNAAIQVNPVKLAYYLLI  
KYPECMQETNTPDLLKALRSHCDNLQDEISFTLLADAYRSVGNEELAGQYTEQAALIVI  
VDDLITGKIKLTTDGGDIEPAMVQEFARGLGVTGSSAVSEGRLDDAAKSYAKLFKIYHEI  
LTGDLKGFQAGANSLATIALLCNHKDLFLHLKQKFGAEINRELVESGLDLLPLEQQIPT  
QLGIPHQAMQSDETLIQSPAEEEEASSALGGANSSADDEG

>gene\_629|GeneMark.hmm|29\_aa|+|2|91 >NVVL0100024.1 Rickettsiales  
bacterium isolate NORP64 Contig\_source1382A\_15885, whole genome shotgun sequence  
IVLRTISILNLFKNSILVDFKSILNSFK

>gene\_630|GeneMark.hmm|59\_aa|+|437|616 >NVVL0100024.1 Rickettsiales  
bacterium isolate NORP64 Contig\_source1382A\_15885, whole genome shotgun sequence  
MNQDFSVSIFYGDDQGRVAFLTGPTPTTKPNVARKIVRRIDTDAGGSRVAQFYAKMNL

>gene\_631|GeneMark.hmm|170\_aa|-|835|1347 >NVVL0100024.1 Rickettsiales  
bacterium isolate NORP64 Contig\_source1382A\_15885, whole genome shotgun sequence  
VHWDERGLQRMHCVRILPRQVHWEERGLQRMHWVRLIPRQVHWDERGLIVRRVHWVRLIP  
RQVHWFANNSTAGTDTHTGAMLAATTRARRSILVTQTTRQGIDQARSLSTASGKNTENIA  
STTKFQIQGVVDVGLSSFLGLDMDESIPGTRKVVGGHVDSVETKPTMSKI

>gene\_632|GeneMark.hmm|503\_aa|-|2103|3614 >NVVL0100024.1 Rickettsiales  
bacterium isolate NORP64 Contig\_source1382A\_15885, whole genome shotgun sequence  
MKKCYQLEKKVLKPFWNTQCLEISKLLWYPENTDLQDLQDLQDLEHISSSKLSVSSNQM  
MENSSFWITKMKNQKMKNWQTTYLSSTSLTVDKWEKEDIKSKMIRIYPTKKQTKILD  
DWRHTNRYVYNKTIAYTRNNPSEKINFQSFNSLVNTIKDVDDKRSQNPVNLWEMKTP  
KEIRAYAVKDVVTAYKTAWSNLKNRNISHFKIGFRKKKSPTSSMTIQKQSIDFKNNYFYI  
YNTFFSGSGISIGKRTLKIKKNDFKDGFKVEHDSKIVYKHGKYLLIPIDISKDNTNKKI  
KKNGVIALDPGTRTFMTGYSTSEVIECSRKADIFKLLKNKISILQENRKYKTIQKYIRI  
GNLVDDLHWRTIKYLTNDYDEILLPSFESQELVKKKNKKNKVVREQLLNKHYQFKRRICK  
SNMLGNVKVYIVGEEYTSKTCGRCGALNNNLGSKEIFKCVKDDCNFKTGRDVNGARNILL  
KHLDVCPRSTQVGSTQDKFASKS

>gene\_633|GeneMark.hmm|143\_aa|+|3779|4210 >NVVL0100024.1 Rickettsiales  
bacterium isolate NORP64 Contig\_source1382A\_15885, whole genome shotgun sequence  
MSNTVEMSSKNDEMSNEIVALSNNGNCDLWNRINDLSSKNDEMSNEIVALSNNGNCDSWNRI  
NDLSSKNDELSSKVNDLSSKVNDLSSKVNDLSSKVNDLSDNSVLCDKNAALMRKISSLD  
ESVNSLKRSSNSDGERVSKKIRI

>gene\_634|GeneMark.hmm|117\_aa|+|4362|4715 >NVVL0100024.1 Rickettsiales  
bacterium isolate NORP64 Contig\_source1382A\_15885, whole genome shotgun sequence  
MVKTIVSLAVKCATSKICELDAKCRITRINKNIETSLIKYVEKNSETFAGPIDDFAWS  
RDEIAYEIAKNNFPFHALFSDECGEFGPFEDTDEVEDFIGEIIKQFFKGQCYIDSD

>gene\_635|GeneMark.hmm|135\_aa|+|4758|5165 >NVVL0100024.1 Rickettsiales  
bacterium isolate NORP64 Contig\_source1382A\_15885, whole genome shotgun sequence  
MNFTFFKKKEPLFIKLTMDKFESNFSSTKEEKIDGIVTNTIYEFFISTCEIPKWKQCQQQ  
KLYVKNTDLYPQILVFYDDKIKQCSVPYWESSTILTYQKNVKTIKVVLVLFQSHYTKDVVA  
CETDYRPEESSDFV

>gene\_636|GeneMark.hmm|435\_aa|+|5393|6700 >NVVL0100024.1 Rickettsiales  
bacterium isolate NORP64 Contig\_source1382A\_15885, whole genome shotgun sequence  
MAVSQMTIYNIANAANAFAEFQTMVGNIIPEGLKHKCMKFPDCNIDVYAPTLFCNDHAATMY  
LGQTTCNIPGCKNKPLVGFVCEESRHMFLTVRLMAKQVKIIREYLKTAENEDTCAMT  
QEQAAVIESLKNELTKKDEHIDALTLEKSGAEANLLFQNAETIKQVKSLEDDLSNAERRV  
FLRHLKYTDDIGSIVDEHKKDIAKKNVEIENFKNMAKNNNTEEIDDLKESLEYFKMRESE  
LSIKCTHLATEKKKMTGAYNDATGVNQAIYGRIRDFQTEDNLKTATINAQNEKISTLKRK  
FAQDFSNLERKFAQDFSNLEKVQEMALNKMASNDVELHRENDKIKTVNDAMETDLNCFKA  
ECETLRSTTDAISEERDALFEECENYRIIMASMKTVFQGFARPATIERPKKRTRVIVEDD  
SDDEIVSELVIDETV

>gene\_637|GeneMark.hmm|55\_aa|-|7420|7587 >NVVL0100024.1 Rickettsiales  
bacterium isolate NORP64 Contig\_source1382A\_15885, whole genome shotgun sequence  
LQIARFQDIWELPIYNGFYFPKQLIFAACCTYSTADNENRSDPTYSDFDQNHNS

>gene\_638|GeneMark.hmm|621\_aa|+|2|1867 >NVVL0100025.1 Rickettsiales  
bacterium isolate NORP64 Contig\_source1382A\_16436, whole genome shotgun sequence  
LLISRLFAFLGGGAIMFSLVETDLLSIIVLANSFYYPVTPPFLLTVFGFRSSSKSVLI  
GMIAGLATSLIWKMLPIEFGSFSQKMIGVLFAMLMNTVFLASHYVLKQKGGWVGIKDS  
YLDEQKIRREKWAALVSKARNFNIPINYIKALPVADDSRYVTLGAYFLVFTFTSIYSTHA  
EMLKANKAIITTIYKTMIISSMMGMYLWPLSIKTEIKQMVMRVWYPLAIFYMLIFFSI  
FFVLLNKDNNLHFVLFVAVNMIVSIVLLGWQMASVMIVVGMVMAVQFYKYYAGIEYLDISL  
GSPQFILLSLVFIGAALVIFFRPQQERQKQTEHKVGELLDVGTLVTVVSSRDSQISTL  
DTKVSGLLEERVDHYTERTTNQAQEIERLGSTAQRILNNVNHELRLPVGNVNMNFAEILHDG  
LGKLSDEQLKMLSKEVYKNSNRLSTMILNMLDLATLQAKKIELQIKLANFSELVEERLAA  
CRKIYVEEKPLKFIKIEKNVMVxMDENYIRQTIDNLVINAINFSEKGIKLVxVAKQTNF  
VTFTIKDQIGIPLSELYDVFTPFKMGSNTEKAEGRVGLALCKAAVNAHGGGEVKVSS  
GAGVLFVRVVLPLASDRGRPRS

>gene\_639|GeneMark.hmm|514\_aa|+|2625|4169 >NVVL0100025.1 Rickettsiales  
bacterium isolate NORP64 Contig\_source1382A\_16436, whole genome shotgun sequence  
MQEKQMTVMTKSLTGAPTAKDIDWNSIPWNKANSEVKRLQMRIAKAERDGMGKVKVLQR  
LLTCSFYAKCLAVKRVVINKGAKTPGVDGIIWSSSNQKIQAVLSLKRGRYKQPALRRIYV  
PKKQRGKLRPISIPTMKDKAMQALWLMALIPAEERADPNISYGFPRKRSTQDARGQCFNA  
LSKGKSAKWVFEVDIHSDFDKISHQWLIENIPMDKVLKFLKAGYMEKQRLYPTNAGTG  
QGSIIPTLAVMAxSGIEQKVRNSxKRVRxKEKINFISYADxFVITxDTPExLxxKVIPI  
VTExLQEVxLELSxEKSKITHIDDGFNFLGFxVRKYQGVLLIKPAKENVKAVLAEIRSTI  
KANYPAKTENLIYLLNPKIRGWANYFRGSVSSKTYSYVDEMIYRMLKAWMLRRHSNKS  
WINRKYFKRRGFSNWNFYATVKDKQGDQTPLYLYKASETPIRRHIKIRAAAHPYNPEFNE

YFKFRETSKTRITNKNPDFLLDYKLLGDNVAHT

>gene\_640|GeneMark.hmm|640\_aa|-|4241|6163 >NVVL01000025.1 Rickettsiales  
bacterium isolate NORP64 Contig\_source1382A\_16436, whole genome shotgun sequence  
MASDPPASDPTRVDPLDQDGLKVDLDCGLEFRLEFESADDIPKVVATPPEKPVFQTRHE  
ATGGLDLLEIPFDSPEIYLDLSADASAGDAMEEEFRASLGRADSLFGSLRDAIGDYDIEE  
DEPPLVMNGEKPTCEVLELPHPSPELNDETIALDMLKMAQSMQERFERIRLTLEDIFNS  
REGEREDACRLSRLEAEIKFSAAEETMRHDSEMRFRNMWDIIDGIIDDSLEEEEREYSARL  
SRLEKDIKSSTAQEIMRDNAQVASEYAEPFVQRHETWEDWSSEEDTPALSTIEERDELPK  
FQPLSDEPTFSDDELETIEFSSAPSSINVAYEEERSNYERELNASDFVLPDDEEIQTPE  
KVIQHTIGSDSKYTNPFTQGIHSDYDGDSEYFKEEYTPDLEQPDPLDLEDELVEPNPN  
SPAVEELIIIEEPEILAYSPPSALVDLTHHAPHNEPVDYKMDLNVPDFILQPDEKTKIA  
ASNNDLPANTEQLFQEAEDDISIFSLIDEVILPESDIIGEISQDKPTEVKPSITPSQTAS  
INDAPLAKKAATDEVVVNNIQKVEDAKTKPKIPMEQEINLGTKQEEAEERNAYNTWLIQ  
KETEHMVSAIGLMRRFIMPRFNTKCRVKSTLLKIPPLSAE

>gene\_641|GeneMark.hmm|67\_aa|-|6370|6573 >NVVL01000025.1 Rickettsiales  
bacterium isolate NORP64 Contig\_source1382A\_16436, whole genome shotgun sequence  
LQEIMPFPKLNLELVELHNFADQQQAAAAIFEYIEVFYKIRLHSTIRYLAPAQFEDNER  
ILRKSVL

>gene\_642|GeneMark.hmm|114\_aa|-|6715|7059 >NVVL01000025.1 Rickettsiales  
bacterium isolate NORP64 Contig\_source1382A\_16436, whole genome shotgun sequence  
MTKLIDMINSFKDNGIEFISLENNIDTTTPMGMLLFTMCTAFSEMERVLISERVKAGLDA  
ARYKDRKGGRPKALTPDKLRLKLLKKSQAFSVTDMCNTVKIIRSVYYRPSIIT

>gene\_643|GeneMark.hmm|822\_aa|-|1|2466 >NVVL01000026.1 Rickettsiales  
bacterium isolate NORP64 Contig\_source1382A\_17624, whole genome shotgun sequence  
MFGIEIGLDLAVVIGFLLINLGVGLYYGQGVKNIKDYALGGRDFSTPALVATIVATWVSG  
SYFVITVSEAYREGMWFVAGMGEVFSLLTAFVLGPKIGKFLGNLSVAETMGVLFGRYA  
RIITAIASIAKTIGYTQAQIKIFSIVLSHILGTDSMLTMLFSSTIIITYSAFGGVKSVAF  
TDVIQFITFGAFIPVCALFIWKIFGDTELLRNTLEHSSNFDYTQLTNIENPKFWTYLFLF  
IYFTVPQLNPTMFQRMLMGKDANQVKRSFAIAAIIILVINLVASLIGIIYANNPDLEPN  
NIFIQIVDDYFSREVKAVALSIIAMIMSTTDSWINSGAVIFVHDLCKPLNIKIRNELLL  
SRIFTVCFGVISVFLALYVTRLFDLVLLTSNFYMPVIPVLVLSLLGFRSTERAYLISVV  
CAIIVISWKYFVTFKVDSIVPAMIVNLVSFLLAHYLLGEPGGWVGNANEPKAKEIKVTQ  
RISEWFARLPARIHQFNLECYCKSRLPKSSAVFNYPFIVAMTMATTMSIESDLYNSHLL  
LINSLQILVLTIAFFCRSLWPQILKEKYLGLIWCVSIFTGLAVISSFLVLLSKFSHMS  
LAILTIHLTTISLFXWRSIAVMISXGLWISFFFYERYXXEMVXGEIYDLKLMIVVXXM  
VAGFAXTIXRSKQEXLEQXEHXXXTLETEVTTQDXKITXXNKEXXHYXXRVSXQAREIEX  
XXXTAQKILXNVNHELXXPVGXVMXFAEMMRDGLGTFSDQXXMISEEVYTNNSRNLXMI  
LNMXDLAXXNAKKIELKKEEVNFSKLVHERFENCXRDVYAQDK

>gene\_644|GeneMark.hmm|161\_aa|-|2577|3062 >NVVL01000026.1 Rickettsiales  
bacterium isolate NORP64 Contig\_source1382A\_17624, whole genome shotgun sequence  
MAKESEITNESNIVNITDNSNLAGRRAAIMFHRPYMETVFYEKLHLEVECKQLGITIVDT

IYNDDKDAFIAYNKLRPHRKKESDESKPLILLASARNLLSSRSLLPKIILSALIELKEID  
LYLYNHGFNIKNGKSELTLKPCNVKGLNMKKSASNLGLFV

>gene\_645|GeneMark.hmm|854\_aa|+|3675|6239 >NVVL0100026.1 Rickettsiales  
bacterium isolate NORP64 Contig\_source1382A\_17624, whole genome shotgun sequence  
MNINQNLINLRLTSIYKADSLWPYVNLTKRGAKFMSIFKRFEQAARRAVEAERRKIAGI  
ATIEAEKVGSAALRSEQSSAISLAQRASDAYTDREVTAKAKQSISSLSQGLSSAVSRLSREE  
ASTRQSNQSIQSQKAAWAVERAEQEVAAELRAAAEEAAGRMELAAIEQQEQNAAQLVLQQE  
LELQAARQIAPYEPNIQPAVIFPAEDIEGKFAEHSEIIQTSSRICEGNDRIAKEKHPQ  
AILLIGNTGAGKSTLAHALSGRGLQGIVEDETGELLIDALHPTEDIVIGHQMTSETTIPN  
KCRNGETVVWDCPGSNDTQVDQEFNIFYIKRLEMSQAVRLVLLVPEPNIVGDKGSKFV  
ETIKYFMNSFDAAMLGNSVSLVSVKVPVPHKRIDHIKNSIDKVLTKNQVTDKEMKAFVGT  
LESSSVHLFYRPRDEGVMPSQANLLAAIEADGDYVVSNDKLNALKLTVSQPAQEYSHDLLQT  
VSGNFNINVLMINAVADSTNMRADDGNLFTKNHAMIARWVPDQMSYDDLREELYFL  
NLDMLTALKGLFESPVITFEQVAVLRGAMQIFERFVDNDEAKQMQEYAYVLNQQFEYI  
KFFSEFIEEPEAQIYDLNALQAVIAQCWENIATNFEYQVKTIELEPGQGAAYYKKAIFYL  
DQCDHPVCATTIAQAHMRIAELVVGDDVPAIEHYVAAIGYDKTLAEVYEQGLGQFQREG  
EYSKAIKWKVVGKAYAIKNSFDWLENAPENVYAIMMVRGGYCEYKGRVDDAVSWYNNA  
ASVAVNLEAAKQASSEERTLSNAKNIRDEGAARVREMMDSNFCNYSMTPEFVESIADG  
VIAGGAFAEADV

>gene\_646|GeneMark.hmm|129\_aa|-|6387|6776 >NVVL0100026.1 Rickettsiales  
bacterium isolate NORP64 Contig\_source1382A\_17624, whole genome shotgun sequence  
MTKEIKILSVNRYPLNTTLRLWKKNFCTIDEAPTGRDALKMFTKTEYNLMFIRELPDM  
LSTDIALQIRSETELNREPAIISVLIPRTPANQDPKYLDAGIDYVLEDPLIGDKIEEVV  
KKFGLGGDW

>gene\_647|GeneMark.hmm|57\_aa|+|3|176 >NVVL0100027.1 Rickettsiales  
bacterium isolate NORP64 Contig\_source1382A\_18017, whole genome shotgun sequence  
EQFCGQAKILLDLSGRNIHKIALKNGQRIYVPEAWYMAAEDLMREKKTQEEGGSDE

>gene\_648|GeneMark.hmm|325\_aa|+|169|1146 >NVVL0100027.1 Rickettsiales  
bacterium isolate NORP64 Contig\_source1382A\_18017, whole genome shotgun sequence  
MSDIKVFDENEEPENIGICTRWVEIGALFILCEVVFVLLMTKEGALIVDIASMWVVF  
LLFLAWVVVLGFVFGVWGLEKAEALSFGWGFVWLSVLLMVLLAFATQEGAGLRRQEDKE  
KQHLQQVTTQLEEATAKYVPWLFNVEEKDIQHKKSYVVDVLENLSSQDLLDDWYNSNSAK  
QFVLQKTKVDAKAQRVELTGLEFGAGHASDTPWQQRIYVIHFIQQDGRWLIRNILDKRLE  
EHFKRVDELKEQGTQESETQESEIKQPAQTGFLTPGELYQSIKDLLGFVSRQRYLFAQNN  
NTNLGYSISLDILYLEKSRDLDLKI

>gene\_649|GeneMark.hmm|134\_aa|+|1339|1743 >NVVL0100027.1 Rickettsiales  
bacterium isolate NORP64 Contig\_source1382A\_18017, whole genome shotgun sequence  
MIKKMAISSQAASSNAASSQATSGCTTGGEAAVNKKGEKELRYKQLLALGAGLGVLLALIP  
EMALANFNLNAGVTAATPLITALTEHWGKGVLSGAGNAIIGEGDGWQRATRAVKGCI  
AGGA AVLALIAMLG

>gene\_650|GeneMark.hmm|98\_aa|+|1736|2032 >NVVL01000027.1 Rickettsiales  
bacterium isolate NORP64 Contig\_source1382A\_18017, whole genome shotgun sequence  
LVKAMNERVFTKCLNHERKYWNRSLGSIVLGVLMFALVGLWQGLMWGLGSGAIGFVVGGM  
ISKHWYLGLIQRKLYWNLPAKVTVDNRNTPDSSDRELL

>gene\_651|GeneMark.hmm|190\_aa|+|2074|2646 >NVVL01000027.1 Rickettsiales  
bacterium isolate NORP64 Contig\_source1382A\_18017, whole genome shotgun sequence  
MNQEIVRLNIETIARQRNVFLLLAMLAISSCLALS SVKLVSTHDRVILVPGLNQEVWTSGK  
GVSSSYLEEVSAMYLPLLLDLDAASIEWKKEHLMPYVSQSDPSYMKNLGEYFARVKARYK  
KFTLSTHFALKSLESDQVNLTVKASGQLISRFGERGFKTNPAEYMLSFVWVNGRLLREF  
AAVSKEKEEK

>gene\_652|GeneMark.hmm|252\_aa|+|2648|3406 >NVVL01000027.1 Rickettsiales  
bacterium isolate NORP64 Contig\_source1382A\_18017, whole genome shotgun sequence  
MIRIKGCMGLLIMLLYLVCAGGAMAGDAHIPSEYKFITVSYGKPTKITLSSNGINRINFA  
EQRVVQIVGESQKFTKLLTSHGADLFLTSKLSGEAGCENISVVLSDGRVIDFVIKIEKSD  
VPTIIKFNFSSLVFQRHEMVLAAASKMIRAMREERVGKYYYVDVKHFKPELLAGVGVQV  
VANYRYLKLAVVVKVTPSNGGIEISENDFHQMFVKVISTRIGKTQGVGTRGVPVRISKP  
EFVYVVYERSEE

>gene\_653|GeneMark.hmm|447\_aa|+|3403|4746 >NVVL01000027.1 Rickettsiales  
bacterium isolate NORP64 Contig\_source1382A\_18017, whole genome shotgun sequence  
MSNLLTSLKEKAIKAGVRIKQLAGRGTGLPVPGLPGLNGESARGNNKILRKKQRGVVVVS  
VCIVLVLIGGVKSYWESSQESKRLAKTKTSETGRRASGSEVLKIELADKALDPELHWRNF  
YEELRRSDRLEFEKRLKEIEKSQEAVLSKAKKAIDTELAGTKRKLMLAHQELEDAGMELT  
RVARMEQERINGAPPHMETLLEAEYFEDEIEFFRPKSAKNYVPEGTYFTGYLLGGIMVST  
ALNTAADNATPVSFRLKHRGNLSKLNKTDISKCRIMGSAYGDLSSERAIIRLEKMICEKD  
GFYTASRVAGQIFGADGFNGIKGTVISTASKHIKNAMIGGIISGLSSSAKGQDGM SILSG  
GLTSTQKKGFKDLAGGGLLKG VGNAGDKLAEYLLKQAEAMSPVLTIPSGARVNLQITKGF  
FMGEKTTHRRIKNGRKGAKQIKKEQKR

>gene\_654|GeneMark.hmm|120\_aa|+|4743|5105 >NVVL01000027.1 Rickettsiales  
bacterium isolate NORP64 Contig\_source1382A\_18017, whole genome shotgun sequence  
MSILKTSIRVVCVGISMMLLSSCSSYKSSFSCGDAAGVHCTSMDCVDRLISSGEIEQYHN  
KARLKGAAHKKWKKSKGNAAKRSIAHENMDLPRVKTPRVKSQGLKTPRVKASLVKPLHGGV

>gene\_655|GeneMark.hmm|514\_aa|+|5105|6646 >NVVL01000027.1 Rickettsiales  
bacterium isolate NORP64 Contig\_source1382A\_18017, whole genome shotgun sequence  
MLAIEKHLKSFADYCGGLKTGGERGCDPMEEFSAKIDAATGGATPLADVLLYDSFDDDSGL  
AFHKDGS CGFFFEISPLVGS SAGLEKNLTLFFNDELPEGGYLQFLIAGHDTSSILDMWE  
SGRTCGGPFLERITAYRRDFIEKGRDFENAGDGR LARNFRFTVYSTNDSGTEKGLKKI  
IKFKRLENKLAERKFPVLCKADDLLQINREIMQMDINLDGATKPARHNMARHDILNSL  
SNQMLSPLSPVRIEEEQINHLATGLVTKVFHPSSELPESFSLSRMISLLGEGDKTVPARFI  
ISYTIANNLGASGTSAMKDQGNRSIHASEMSYTRNDLVAREEARDWREVLAIHKKGEQFL  
TESMQVSITAPKEEIEIAEEVLKSLWNAQDWKLAISGNIQLLGM LSMLPMMQASYYQSLK  
FFKLTRVAMSGEVVAKLPLQGEWKG VVWKS GVLLMGRRGQLFCWNPFERVGGGGNYNCTIV  
APSGAGKSFNLAETATSMIAQDVAMFIMDIGGSY

>gene\_656|GeneMark.hmm|629\_aa|+|2|1891 >NVVL01000028.1 Rickettsiales  
bacterium isolate NORP64 Contig\_source1382A\_18079, whole genome shotgun sequence  
HDICSIIDIKEENKLIKSRIFAIFISVAAVLMALLLNLDLILLAANFYLPVITAPLLL  
AIAGFRTSERSVLIAMFSAGVTVIFWQWLQAITGVDSVLPGMVMHIIALFAAHYLLGED  
GGWTGGGTSSGAGNSFGTGRDGTGTGIGEDNKRILSRERVQMAWQELKDFNILSYCNK  
RLPKSWIYISFSFIVFMTIVPIVSIEKDLNMMHTGLISSLQAIVFAIGTAFRCRGFWPK  
SIKEYLGLIWYVSIFTGLALISSFLVLLSKFSHMSLTILTIHLIMISLLVGWRMSLVM  
PAGLWISFSFYEGYIGEMVTGEIYDLKLTIVLVVVTGFAATIIRNRQEHLEQTEHKVG  
ALETEAITKDTKITLNKKVCHYSERVSQAREIERLGATAQKILNNVNHELRLPVGNVN  
NFAEILRDGLEKYDKEHLKMLSDEVYQNSNRLSSMILNMLDLATLNAKKIELKKEKINFS  
KLVHERFENCRNIYAQDKKALKFHLNIEDNVIVFADINYIRQMIDNLVINAINFSEQGTI  
AISVNSEEFVSFTIKDKGKIPKTEIYDIFTPFKMGSNTESKAEGRGVGLALCKAVIEA  
HDGEIKAESRPVGLFRVCLPYGELKEGK

>gene\_657|GeneMark.hmm|77\_aa|-|1975|2208 >NVVL01000028.1 Rickettsiales  
bacterium isolate NORP64 Contig\_source1382A\_18079, whole genome shotgun sequence  
VRQNESEELTNLIQKHFGFLTDEIVDVLFEPEARDDAGGVLTCSQSEEFALKFDDILS  
QSFHLFSSDLKGRAYSQ

>gene\_658|GeneMark.hmm|107\_aa|+|2260|2583 >NVVL01000028.1 Rickettsiales  
bacterium isolate NORP64 Contig\_source1382A\_18079, whole genome shotgun sequence  
MLYNNTPFKTLTENTPDELYEWIDEVKNTFLNKFKNIELIAQKDFETLTKVVDANNRKEQ  
AKHIAKTKYPKLVFAMLDKDFRSMIWKMLEPSKESPFRLRKNPVTV

>gene\_659|GeneMark.hmm|341\_aa|+|2637|3662 >NVVL01000028.1 Rickettsiales  
bacterium isolate NORP64 Contig\_source1382A\_18079, whole genome shotgun sequence  
MTAKNSNKINKKKQSKSTNLAKAEIEKPKLKHDEFMKETLGRRLTAIDFVKDHLPAKM  
QEQLDLSTLEVEKETHVEKSLKRMSDLVYSVKTKKGD DAYIYMVLEHQSSVDRDMALRL  
QRYQLLLCQRHRDNKEPGKLPPIIFPLVIYHGKRYTAPLSFWELFDDPEYAKEIMAGNYT  
LIDLRAMSDDDINYDRHHSFAAMKHIYDRDTLKMQLLANCKIAVSLDKREKYLFLS  
LIEYTPKVPKREELAQVIQGHMSKEDGVKFMKTVRDSYIDEGYVIGEKKGAEQKSI  
QIATNLLNQLDQKFVASVTGLSAHEILKLSAHNSNDKS

>gene\_660|GeneMark.hmm|91\_aa|+|3686|3961 >NVVL01000028.1 Rickettsiales  
bacterium isolate NORP64 Contig\_source1382A\_18079, whole genome shotgun sequence  
MNKAEFVSHIAKQYNCSKVRADIIINMFTSSVIDALGSGKEVSLAGFGHFTVSPVAARTG  
RNPRTGEPLQIKAYNQPKFKSGQRMKDACNR

>gene\_661|GeneMark.hmm|152\_aa|+|4242|4700 >NVVL01000028.1 Rickettsiales  
bacterium isolate NORP64 Contig\_source1382A\_18079, whole genome shotgun sequence  
MSTSKLQNVGVFILLIFISWAVYADESAATIQQATKHAASSDKEIHLAYLQCYALQEND  
KKQCHQLITQQFNLDREPSSQKYWLYYSYEAERLGFQWFLNSHNKSCAKIDHGVLFNQAT  
NSYDVICADGNKFKMSFSYKDNSWTLLEWLIV

>gene\_662|GeneMark.hmm|201\_aa|-|4697|5302 >NVVL01000028.1 Rickettsiales  
bacterium isolate NORP64 Contig\_source1382A\_18079, whole genome shotgun sequence  
MPLSKLGANLKLLRESAGLSRNHIERNYKIPTGTVLAWESNKCLDIKLTCLMNYLDVYKK  
LGFSVTIDSLSEKQFSPVSCKLSILNNFLVSSFGIDLLQKIPNLFYSDRDENILYLNP  
LYHNTDSLVDKERMNANTLTAGQMLLKANNEYRAQIDEVLKGKTVNAEYHHAGDHMLKIQ  
LQPNIYTHNKTIGFVATIVN

>gene\_663|GeneMark.hmm|100\_aa|+|5539|5841 >NVVL01000028.1 Rickettsiales  
bacterium isolate NORP64 Contig\_source1382A\_18079, whole genome shotgun sequence  
MDNNQTYHLDPALSTHMNSLVVQAFRELGDSLADNLAFLIEVLEGEQNCNVRTAYMRI  
KDKIAENLDNILLRHS LAIIDEIRKEAVFIDTICSTEREF

>gene\_664|GeneMark.hmm|131\_aa|-|5933|6328 >NVVL01000028.1 Rickettsiales  
bacterium isolate NORP64 Contig\_source1382A\_18079, whole genome shotgun sequence  
MHKQELATTRESLQLLLAKEDIDMCVNRVHSSSSTA EYKYCSADLITSKLLETEAPALEE  
WESLSVLP AFNSKDSFVRSMIHTHIAKYCTFLVGILYELQSSKNLAILSVKFKQELAEAN  
FHKANPGSQSE

>gene\_665|GeneMark.hmm|482\_aa|+|3|1451 >NVVL01000029.1 Rickettsiales  
bacterium isolate NORP64 Contig\_source1382A\_18225, whole genome shotgun sequence  
EMEIIKAENSLYESGLGAVRGKRALVVIMFAQKFAKTRNRIGQTEWEGSAKLLADDAKVS  
VSTVRNTIDYLADHGF MNWELG LLQFQNGDIKQGHHSYYPTE RMTRLIDQVDPIKSAER  
AADDGMLQAHVTVLNYGEEIDQNDLFSYWEQTAETIGGQNI DHTCLESRSKDIYPTPTVI  
KPQRKHIGNKQMRRNEAIPVQATLAPAPLRDTKTSKLPNDISDMPNTKTVAFFPFGKKV  
LEMHSTQKRRDSADLLELEDHEINLGNMPIAADGMEARELILIGLEALIISLALRQKDPE  
IISGYDFECL ENAPISTLAKAVFNSAYLALGANIITSGAFKAVKSSGTITILALLD TTL  
KKISRTAIPK NPFQYWRSTVKNSIESADPITGLGSAIKTHSAVVAADLRDFLT KTSALL  
ATEWVNGQAERSAE EILEAHKDIRQKRGDWSDTMPYIDHVKMAFENRTVQNRTLFFPVGL  
MF

>gene\_666|GeneMark.hmm|68\_aa|-|1523|1729 >NVVL01000029.1 Rickettsiales  
bacterium isolate NORP64 Contig\_source1382A\_18225, whole genome shotgun sequence  
MKKTRTTPDRKKQILFKPMKYWRKKRGFSQKEFAESINKPAAHVSEFETGKRSVTEVWIT  
SICKSAEH

>gene\_667|GeneMark.hmm|135\_aa|-|1803|2210 >NVVL01000029.1 Rickettsiales  
bacterium isolate NORP64 Contig\_source1382A\_18225, whole genome shotgun sequence  
MLKYYSLENHTDLKKQIMAIKRASKINSKFKTFERMKFWRKQRGFSQTEFARKISKQPQH  
VSQLESGNRGVTDDWMHLYADALNVSPIVFF EAGIDPISEKISADVAQHVKKLTHPQKIK  
FYMTVLELVNQPIEK

>gene\_668|GeneMark.hmm|112\_aa|+|2615|2953 >NVVL01000029.1 Rickettsiales  
bacterium isolate NORP64 Contig\_source1382A\_18225, whole genome shotgun sequence  
MYPSTFRFRHGSNLAEKLN AEDNKSKVIKQALQQY NAGPTTDPEIPAVWQSVNRKLSG  
VSTNINQIAYAFNRSSKKNVEHLPPVESLLELNKQVSNIISELERLTIESAV



>gene\_669|GeneMark.hmm|587\_aa|+|2950|4713 >NVVL01000029.1 Rickettsiales  
bacterium isolate NORP64 Contig\_source1382A\_18225, whole genome shotgun sequence  
MSKRPRNPWEQRLRAPTYRQQKVTIPQKFEKSKEVFKVLSHKTIRGVVNSIAYNADHG  
GQDEENSMFDKNGVQLTPEEITKRIDNWNLIRDGYENFSKKAREATPVELREMPDDEKYY  
LRQSTHFMI SF PHEHNELTDDKIHKIVQDAIRPMTDAGHHALYAIHRHQNKPHAHVVMKY  
RGYNNKRLELNPHQIQKIREHIVEVAKEQVELTATRRRDRVQSLEKRLPSIENYKAAYL  
YREMLKQKKDFDKAGLSAEDINLALSINERRDQIKKYKSDKIYNALGKKIQKLEAKHE  
KKPSDKLRQNIAGLAVQRDGHKVAIDAEMNIRAQRVNKPEDLVYSAIDKSQLKEVKKTLL  
GDYEAVTQ NINDLKLTRRHLENVAP EMLKQSKGDFVESKSHFDIVLENRNITRASLIK RQ  
APN WYASHGLE YELRRSGATNTDVPNPYPNVRLPKLAMKTNQELKKFTEANYMDPEAARK  
SFLIMAADNSRTAFWYANKCGEIFGELKPKDAKRIEISSRDIRLSKDWKDQAKVSIKSAYS  
NVSDNIESYHQEIADKLSRNNENVNQVGYLMNSVEKEGLTKAVYRSG

>gene\_670|GeneMark.hmm|217\_aa|+|4942|5595 >NVVL01000029.1 Rickettsiales  
bacterium isolate NORP64 Contig\_source1382A\_18225, whole genome shotgun sequence  
MILTMLNNIKILVVVTISILGISLASAKAETVIIDGTL SYWYEGSSRH SKYKLIQEDYPR  
INNEG YLLPPKRTLIDEDGNEVPYSLEKHLERIEIIMEERSYNFEIVCDLDVARHKMFV  
EDPQAYAGMLRNKQHPCEMSPGHISAHRIKSAKHIFVLD FIDEKEIHVGG LNRSH TTF  
DDLAI VSLGDLRAGVNF SIKNEEGFLKDRQVNLKIRE

>gene\_671|GeneMark.hmm|227\_aa|-|5789|6472 >NVVL01000029.1 Rickettsiales  
bacterium isolate NORP64 Contig\_source1382A\_18225, whole genome shotgun sequence  
LAIDDYLAIPFAVLMFIIVMTVEINTDGDITGVLTAFR DIGLRLGLATI ANGEVDFES  
GASSAGIGALLCKISDVYDNF WELTTTLWESISFY EIGKMFNIMFL TTPYFILDKLLLI  
TL LIEFIVFYGAALLMPAGVYFLMFPKTRTF FMSLIKIMLGVM MKLYLVVINGVILTTF  
EVANSHAGGEDKTLDFYSADFLYMGLSGWILIHLLRRISRCKSDV

>gene\_672|GeneMark.hmm|116\_aa|+|2|352 >NVVL01000030.1 Rickettsiales  
bacterium isolate NORP64 Contig\_source1382A\_18417, whole genome shotgun sequence  
KQIDKIGNNGEKVMKTIADGRREEGWKDG LAEGREEG REEGREEG REEGISIGEERGEKI  
GEERGEKIGVEVERKKT VARM LKENFAPKI ISSITGMSQRAISK LRSQLELQ GKLV

>gene\_673|GeneMark.hmm|98\_aa|+|440|736 >NVVL01000030.1 Rickettsiales  
bacterium isolate NORP64 Contig\_source1382A\_18417, whole genome shotgun sequence  
MLKQIDKIGNNGEKVMKTIADGRREEGWKDG LAEGREEG REEGREEG REEGISIGEEVERKKT V  
ISMLRENFAPKI ISSITGMSQRAISK LRSQLELQ EKLA

>gene\_674|GeneMark.hmm|61\_aa|+|760|945 >NVVL01000030.1 Rickettsiales  
bacterium isolate NORP64 Contig\_source1382A\_18417, whole genome shotgun sequence  
LCFVICPPCGGSGAEKHGNSMPSG EFLDSAFR KLLLAGLEYCFEIRPSFWGDNSRPADVA  
S

>gene\_675|GeneMark.hmm|835\_aa|-|942|3449 >NVVL01000030.1 Rickettsiales  
bacterium isolate NORP64 Contig\_source1382A\_18417, whole genome shotgun sequence  
MYALQVLLLKTQVLLYN NCVIFIMLGIPMSNTENKPNADLYEADSIKVLKGLEAVRKRPG  
MYIGDTDDGSGLHMMVYEVVDNAIDEALAGHCDLVRVIINKNGSVTVSDN GRGIPVDIHK

EEGISAAEVIMTQLHAGGKFDQNSYKISGGLHGVGVSVVNALSDWLELRIWRNGKEHLIR  
FRNGDAEFPLRVEGDGNGKKGTEVTFMPSANIFKIMEFCYNTIEHRLRELAFLNSGVRIL  
LVDNREEETKEIELLYEGGVQAYVEYINRSKTALHPCIALCSDNKQGITVEFAMQWNS  
YHENILCFTNNIRQRDGGTHLSALKSALTRVINSYADKSGLMKKAKVSITGDDAREGLAC  
ILSIKVPDPKFSSQTKDKLVSSVSRPVVVESSVYAKLLEWFEEHPSEAKAIIGKVIEAASA  
REAAKRARELTRRKSALVSNLPGKLADCQEKDPALSELFIVEGDSAGGTAKQGRSRKTQ  
AILPLRGKILNIERARFDKMLASEQVGTLITALGTSIGQDFNIEKLRVYHKIVIMTDADVD  
GSHIRTLTLLFFYRHMMPPIIEKGYLYIAQPPLYKVKRGSSEVYLKNEQALQDHLVSGALQ  
DASVKLNTGEEVSGAPLEEMTSQIVKFNSRLSNIAKRFDSNIAECLAINDLLKTESFTSS  
KKDELVAALSPLNLGDAAPDKTDWEVSVSEGSIEFSRLVRGVKNTKTLTYREQAESSEFIL  
LNKIGQKLERFFLGKCELNVKSQSYQISLPSHMLQLITESGKKGLTVQRFKGLGEMNAEQ  
LWETTLDESEKRTLLQVGVNNIDEAEEIISTLMGSSVVEPRREFINKNALNVTNLDV

>gene\_676|GeneMark.hmm|292\_aa|+|3448|4326 >NVVL01000030.1 Rickettsiales  
bacterium isolate NORP64 Contig\_source1382A\_18417, whole genome shotgun sequence  
MAGKFMTQLEFKQLSAAIDDDYDLILFDIWGVIVEGGEVYDGVVDANKVILQKEVIFLSN  
APRPAFKVINTLRGWGISDLTEEMITTSGLARKIILQKKESLGGRNPIYHHLGADRND  
ILSDFDHLTDLDDKAEVFLLSIYRDDNEDIHEFDELLKQAAKPNLLNICSNPDTTIPK  
RGSRLRYCAGYFAEIIHQHGGEVVYTGPKTTIYDEIFRKKPNIKKNRILMVGDTFETDIL  
GANDSGIHSALVLSGNSEPFHNMHSAMEDKLVALQKRGMKVGSMPNFVTKLV

>gene\_677|GeneMark.hmm|143\_aa|+|4330|4761 >NVVL01000030.1 Rickettsiales  
bacterium isolate NORP64 Contig\_source1382A\_18417, whole genome shotgun sequence  
MFSAPCEFILENEQDSKALAQKIATNLKLHDVLAFTGDLGAGKSFFCREIISLGGQIN  
VISPTFNLLQIYESKNFSIYHFDLYRLKHQSEVYELGIEEAFDSALSIEWPEIIGEILP  
KGSIFVDIKIISDSSRRVSIRKD

>gene\_678|GeneMark.hmm|551\_aa|+|4844|6496 >NVVL01000030.1 Rickettsiales  
bacterium isolate NORP64 Contig\_source1382A\_18417, whole genome shotgun sequence  
MAVEDKGASLESRESGFGEARSREARSKENSTQRRRDPDDFDVLLGGRKADSPEKETP  
SANEPDIYQTTATAPGGSRPKSEEKHAEPHIEVAVPPNATSETLAAAQVQEVEPEPEPD  
AVQEQQEQEPEPAQNEEKEQDEKATLNAAPTAVGLEDAAPSPTDDEAKTEAIRAREDALFEAR  
AKEQEQAIEISASGGKQGGDDDPGEERATDRFYSGGSGGDKAPPANELDQSVINASYINDAV  
DDITQAIIRDQIIAKQQEILQAAIAKTLESEARDKFLNLTRLEFRDYLNKQGRGQAEAL  
QNSGVQAEIQRIDLEGYRSVHYDFKDRFRNVWEKKDTTSTIVKDGDRICKLTETIVN  
IPGQFVTANGEQVEVTSYRKINFPISLENGGPMHLSMAVKDQHGKNISKQDAVYFTAHYN  
EEGKLMELSSPVPVKFAGEGGDAIGYIERGGKIYTLVTRANYQAMMHEVGINNGLSTNL  
SQTLPSPAIATPAQAAGQEATGQAAGQAMGQDQGRERGQSQPKQRDPSNDRDAPPPPPA  
PPPPPPPTPG

>gene\_679|GeneMark.hmm|518\_aa|+|285|1841 >NVVL01000031.1 Rickettsiales  
bacterium isolate NORP64 Contig\_source1382A\_18590, whole genome shotgun sequence  
VSLQQNTRGGKQNPTRVSLGIGNIVPHYWYKSIKAPSGKPDVAITVLSLWFLHRKSG  
GAEFNAGYANFERKDFRSQKLDAMVRLHDDGLLRFRALVINGRTFPNELHLALNIA  
SLLAMLPNGASGGGKSGGSSFSQDMESSNSDDGEIFHGEVFGNSVQHSLETPEEHIRNRK  
ISLRKNRSLRSEESSFKINDLKEELDSGSTLSATSNSVPSPSDYQKLPANAGLGEFYPL

EREDIAALASSSGREFGMNAVNEILLKLSKCPDHSFPNKA AFMSYMSKVLRYEKRDAVR  
INNAHFRI RSNMSETELATVEQERFLAGIENIREVSPMLHLKKK LASVLAPDIAAPLLRA  
FRSIRRDGDVCKIYLSRQVELTDLNKELILNQVKATHEGLTSGGAGMFETISRVEIISPQ  
PSAVAPEALKPEMLASTTQEPGIWGQVRARLIEYFGADGVAIDQNWFSRLRAEIDDNSQS  
LTLKTSSEFFRDWITSHYRDLIERFCKMFGFEFAGVVV

>gene\_680|GeneMark.hmm|88\_aa|+|1933|2199 >NVVL01000031.1 Rickettsiales  
bacterium isolate NORP64 Contig\_source1382A\_18590, whole genome shotgun sequence  
MEKEFKAARKDNSAQDSLIVLEWVEEQFCGQKILLDLSGQNIHKIALKNGKRIYVVP  
EAWYMAAADLIREKKTQKAGGSEDLLKG

>gene\_681|GeneMark.hmm|70\_aa|+|2228|2440 >NVVL01000031.1 Rickettsiales  
bacterium isolate NORP64 Contig\_source1382A\_18590, whole genome shotgun sequence  
LLKVSQTNLARSWDNATSEFFSTLKRLEVELHNFADQQQAAAAAIFEYIEVFYKIRLHS  
TTLISCSHTV

>gene\_682|GeneMark.hmm|254\_aa|+|2672|3436 >NVVL01000031.1 Rickettsiales  
bacterium isolate NORP64 Contig\_source1382A\_18590, whole genome shotgun sequence  
MRQSLNLELR TETLELVKDYFTQLKMFKVDHIGYREFRKGDTSM AFCSHLDWYDVDTD VV  
YKEEMANHYAKELIFLVKNQFDCITRSASSINNKFLQELSSKDMCNSFLIYKNTEDVIYM  
YAFISSLNPDALSYFVNQSGFLEELINKYKATFASVFQKSKYQELREQMFSEKVAQHIF  
SDLTSSMQNSSFQQLTPKEIECTALVARGWNNKAI AKKLNISTR TVEFHLSNIRNKL NIN  
SRNDIVDI AKHINY

>gene\_683|GeneMark.hmm|451\_aa|+|3399|4754 >NVVL01000031.1 Rickettsiales  
bacterium isolate NORP64 Contig\_source1382A\_18590, whole genome shotgun sequence  
MILLILLNTLIIKRTMKDLSKKVMGSCFLAACLEMYDFAIFGFFSSVLHSNYLSFLDKKN  
AMIIAYALFAVG FIFRPLGSLIFGYIGDVYGRRIALILSVSFMGSASLAMFLMPSYAMIG  
ILSCYLIARIVQGISVGG EYS GALIYAVEHFNKKKSGLVGGVVICGCITGVLLASIVS  
KILQNP ELPEYSWRFAFL LGFGLSAIGYFIRKNLLETPEFKRLGSSRVKVPLIAGLKNYT  
TECIGTIFA AASLGINFYFILIFLPGYINKLTGLDVKFYPTLTTVILILSPMFGWLS DK  
LNRAQMLKWSMLAISCYSFVGLQLVALYPTYSSALLFFCGHAIIFSIQASTANIFIIEVF  
PPQCRFSCASVCYSLGMGVVGGTSPLLASLILDKFDNPTFYLSYITMISFLGYVGV RVI  
TSKKERVKEVEPLIAESDLVWSYSYEFENQQ

>gene\_684|GeneMark.hmm|276\_aa|+|4898|5728 >NVVL01000031.1 Rickettsiales  
bacterium isolate NORP64 Contig\_source1382A\_18590, whole genome shotgun sequence  
MKNTIELRSGISLRESLA AVEGEFGIHASSVDISKLA EVVIPDQIKDEIPTLNRMGYMKT  
AVDSYSQEFIDYASKSDLPVLEIGCAYGFVAGRVLENGGNIIATDLSAEHLAILL KKTNQ  
EHLERLHLYEGSFPDNVDFPKKSVGAILISRVLHFLRGEVVEEGLDKMHGWLS DGGKLYF  
TAVSPYHVAFKEKFLPSFQERSRAGDKWPGVIENLWEIAPQHKEYVHEFLNIFDIPQLEG  
LLPKHGFTLDRISLDFPNDTDSAGKGHVGF AATKV

>gene\_685|GeneMark.hmm|181\_aa|+|5886|6428 >NVVL01000031.1 Rickettsiales  
bacterium isolate NORP64 Contig\_source1382A\_18590, whole genome shotgun sequence  
VTILQKARGGKKNPAREVSLGIGNIVPHCWYKS IKAPSGKPDLVAITILSELWFLHRKSG  
GVEFNDGYSHFERKFD FSRSQLQDATLRLHETGLLRRSFRALVINGRTFPNELHLALNIV

ALMAMLPNGGGFVGGSSSGLDMESSNSDDGEIFHGEVFGNSVQHSLETPEEHIRNRKISL  
R

>gene\_686|GeneMark.hmm|244\_aa|-|1|732 >NVVL01000032.1 Rickettsiales  
bacterium isolate NORP64 Contig\_source1382A\_19237, whole genome shotgun sequence  
MGRHKLRIKDALKKIHCALESRGNLAAPIIESYCEMIESRMRGQIRSTIISPAISGMVSS  
GFNMLGEQIISQMESGTLIEEARLLPDRDLGISAGDAADDEIKHHANSDDPDSSDDEAWS  
QNNLASRDELGHFFPIEDREEPHEPATILNTEFGPVIIPSSAPMSFDPEQSPGLEFRFSS  
VIEAEFLKMSDEDLQQEYSTLAGGMGALRPEFLYNAREIALSLAYKARFAEQIGQYNVAA  
IADA

>gene\_687|GeneMark.hmm|92\_aa|-|835|1113 >NVVL01000032.1 Rickettsiales  
bacterium isolate NORP64 Contig\_source1382A\_19237, whole genome shotgun sequence  
MNKDPVKEYRLLMTEFVNGNIADSQFEISYLDLFMDDKKQGMSEKELYKIISDVFFDVEDY  
CSDVTLRDERDIDETELLKRTKAALKKLNDFK

>gene\_688|GeneMark.hmm|263\_aa|-|1115|1906 >NVVL01000032.1 Rickettsiales  
bacterium isolate NORP64 Contig\_source1382A\_19237, whole genome shotgun sequence  
VEYIVTREYLISLLKAWKNDKITDQNVYDTANFLYPNDEIYYIDWELEGGWDNDNTSIA  
QEVVSILEPMDVDGILKEDADAYIEFLHTPIGKYKEGAVKLGIIYESKIDYTKRSEEFAL  
YPLSFPTVRNSSTETFVITREYLISLLEAWKKDQITAEDIYNTTNGLFNSKFDSFDWQ  
KGMLGSKVSLTQEVACALKAMDKNLITKDDIDVYLEFLHTPIGSYSEGAAKFEKYKSKIN  
YAEREAKLSDISPYSKSKNGIVV

>gene\_689|GeneMark.hmm|246\_aa|-|1912|2652 >NVVL01000032.1 Rickettsiales  
bacterium isolate NORP64 Contig\_source1382A\_19237, whole genome shotgun sequence  
MLDQAAHTMHLIDPGSMALNGATNAAGHIVSKTLQKLPESFTNAVAVSYASLMSDCRTK  
NQRFAVETMLGVVLVEVGGAGIKAVMMNRGVGVQGVTSKIVDIQPQFKGGGRNPTISEMH  
LHNAAVHDISSPARYSGKMFKNTRDQARQFGDNAGVRKAARKFFGSATRGTVGRNTIPT  
FAHFKARKVPNGDTVMEFFAKSKEPLYIKRYIQVDRNGAVKLRRQETIIKETGRLVNLK  
FNNFKE

>gene\_690|GeneMark.hmm|96\_aa|-|2799|3089 >NVVL01000032.1 Rickettsiales  
bacterium isolate NORP64 Contig\_source1382A\_19237, whole genome shotgun sequence  
MYKIKDFGIFLEKVLKRTNKPSVIGNLAFKEYHNNLPDVEKEVQDIAITLSSMEDGIEFE  
YSIDELHEIAKRLTEGDITVTRIGFDQKVNLIKTSK

>gene\_691|GeneMark.hmm|607\_aa|-|3092|4915 >NVVL01000032.1 Rickettsiales  
bacterium isolate NORP64 Contig\_source1382A\_19237, whole genome shotgun sequence  
MSLVSSTLSKMASNSGSAARAITSVSVVAQIASAIDKIEAIAAGEFCDHMEHTIHDISS  
TLPTTEGILQHMLPSIRANDISNITRHLQNADIIQDNWNINASLLGFEGGIQQLTSAPAT  
GTISPTRVSPSTLTASIPRPFEEELHSFAPPASTAATR PATQRRNFDQISGMGRHKL  
RIKDALKKIHHALESRGNLATPIIESYCEMIESRMRGQIRSTIISPAISGMVSGFNMLG  
EQIISQMESGALIEEARLLPDRNISGISAGDAVDEEIKHHANSDDPNSSDDEAWSQSNLAG  
RDELERFLPIEDRPEPHEPATILNTEFGPVIIPSTAPMSFDPEQSPGLEFRFSSVIEEEF  
LKMSDQDLQQEYSTLAGGMGALRPEFLYNAREIALSLAYKARFAEQIGQYNVAAIADAIR

ATIGRMPVIGDIAAEGAISTIEHITGQPLHKPGELPAINMIGNRVAAGFGGNISLDSTAP  
KPVNVNRVPRINQQPARDNVQNVNAQSAKAKMSSLQNAQTNAVKTRTLDDGRIRYYEKE  
RLARKEGITRGSSYVTEYNPQTGRVSSWNECYDHSGKVIRVHPKTKNGMVLNSVHFPLTK  
KELEESR

>gene\_692|GeneMark.hmm|161\_aa|-|5029|5514 >NVVL0100032.1 Rickettsiales  
bacterium isolate NORP64 Contig\_source1382A\_19237, whole genome shotgun sequence  
MVVSAIVNSIKWTRKNKPITEEQKLLQKIPFIFPTMFIQLLKHSSNGGVLDDYDFNYCDIE  
DKRVMENIPCIYGVVELKYDNLKEYHAPPEFFSKNIVAFSDTGGGNYVCFDYRSNPKTD  
NPPIVYWNHESCEGEDVSFIAKDFESFLRMLKEPEYDDDEL

>gene\_693|GeneMark.hmm|223\_aa|-|5496|6167 >NVVL0100032.1 Rickettsiales  
bacterium isolate NORP64 Contig\_source1382A\_19237, whole genome shotgun sequence  
MPVIGDIAAEGAISTIEHITGQALRQPGLPAPNTIGSRMLGFGGNISLDSTAPKPVNVD  
RVPRINQQPYDPRAAEALVQERFGDGVKIVPRTVPRSNAPNVRLAGTRHPETGVVFDNR  
GFPIFDDHVIFDTRIPSKVSRVENSKNHMRAATSDLRQKIDEGVVNPNMFNAEQLEAINN  
CEPKIPNYTWHHHQDQSRMQLISTELHKTTSHIGGMKLWWFQR

>gene\_694|GeneMark.hmm|82\_aa|+|3|251 >NVVL0100033.1 Rickettsiales  
bacterium isolate NORP64 Contig\_source1382A\_19549, whole genome shotgun sequence  
RKFRKSNALKKEQGNSRIFKSKSGKSILRRVGGKNGIQKLYTLTDLKAHIRPRFGFQKMAHK  
VFIRHFDKIFQRQLDHTLKTAL

>gene\_695|GeneMark.hmm|67\_aa|+|412|615 >NVVL0100033.1 Rickettsiales  
bacterium isolate NORP64 Contig\_source1382A\_19549, whole genome shotgun sequence  
LERGIKNNFIGSPVFFKRRKPLRILTVAQGSRRRKAKTQVPQQIALNLEPTQKNEMPHL  
PISVWGV

>gene\_696|GeneMark.hmm|91\_aa|+|694|969 >NVVL0100033.1 Rickettsiales  
bacterium isolate NORP64 Contig\_source1382A\_19549, whole genome shotgun sequence  
MVLTIEMIMEHIYANLTASISELKKSPALLNSSNGEPIALLNxNKPTAYLVPAxLYEQI  
LDLLDDRELLQIAKSRLNEESKAIRVELDEL

>gene\_697|GeneMark.hmm|82\_aa|+|959|1207 >NVVL0100033.1 Rickettsiales  
bacterium isolate NORP64 Contig\_source1382A\_19549, whole genome shotgun sequence  
MSYKLDVFAAKKEWDKLDFTIKEQFMLALTIFFMRSLQKQKRRLESKVEREQKAIADLP  
ELAITVLDYVKNHGRVTNRDMA

>gene\_698|GeneMark.hmm|276\_aa|+|1392|2222 >NVVL0100033.1 Rickettsiales  
bacterium isolate NORP64 Contig\_source1382A\_19549, whole genome shotgun sequence  
MSFFLHPNPKILRKDKLELMFHSNEEIIYQNRDDQLGDMIPFRHIFVIYFCDLQDTP  
PNTTQNSYSLIVEQYKKNDEITYKAYFGYGDLSLRVKSEIDFIDSPKGFSGSIIINHLIH  
WGKQNYPEAKIKQLYLSAHEEDKNNHIRRDRLYNKIGLIKYGFKHLSDLKPSCDERDF  
EVIDAYKYINQILIEQDTLRSTKSDLKGDLSYLEECSKQEKQEIKKYKILDNPFRTAY  
YLCNTIDNIIIGYVHWLWLNKIASILKGVANTKKQDD

>gene\_699|GeneMark.hmm|93\_aa|-|2330|2611 >NVVL01000033.1 Rickettsiales  
bacterium isolate NORP64 Contig\_source1382A\_19549, whole genome shotgun sequence  
MSKLIQLIKFLKSCYRKVYVYVYIFSTRKNWHISKKNKYYNPTYKATVYWYSGFGRNSEIK  
EGWSIARFGVYNGYKSREIAQEQAFKMWMRQR

>gene\_700|GeneMark.hmm|86\_aa|+|2666|2926 >NVVL01000033.1 Rickettsiales  
bacterium isolate NORP64 Contig\_source1382A\_19549, whole genome shotgun sequence  
MLFSLCYKKLYIFSCIFTIKGGKGVINLSLKHATKPQIKKERALMKKSYPRLFSGGITTN  
QRKTYTLPSNVLLFIGYKETIFDTLK

>gene\_701|GeneMark.hmm|1056\_aa|+|2923|6090 >NVVL01000033.1 Rickettsiales  
bacterium isolate NORP64 Contig\_source1382A\_19549, whole genome shotgun sequence  
MSADKVTDLIDYWIIVERFTPYEVEMNNKFGYVESIQKVCAEDIAWKNKFKFKHKNTKS  
HNWVYTVFLGIIKIDDINARIKDLLGSDVNDPSWLKSNSSSCIGCFQVNINGKPIKGTFE  
VPDYFPNICSQAQRKSLPKTWLDNSCVFRRKITDRFENYCDALEQENNHNSLGYNDLQIL  
LDQIIDDLSLWPELTKNLIKNIHAVIAHAKLPKPKNPQEDLVTLPDSAIHNSFYTKDLEN  
IRMDGRFGKGFQYEMNMIDCGEKIDLFGKQGALKEYSHPNYLSGARWPVAGNYPLSTAQQ  
IAVNLALKSNEGLFSINGPPGTGKSTLLKDIISGVLLERSRILLTDNANDAFESSVSVS  
VQGYNYKTWRLIPSLGHEIVIASSNNAAVENISKEIPRLREIDINLEQDVDYFSEIASY  
ILKEDSWGLAASALGNRKNCLDFEFKFWYKPKKNPVVKEDYYYGLEILLQNTTDIPDWD  
KAKQSFKKVLNQYDEIISELNKLYAMSQSLSGNIFDYHVERLDLEEEKEQLTDKLED  
ARNQLLYLHKSLCDQNEYHVRHVQERSSGIGYLIDLIFNRERIRYWLQEYRRSSCKLLSI  
CKSINTAEDTVNQLEKELRNKASRIRILNEKTHIAETEYDQWLNIELEYRSKMGDNFPDD  
DFWQKDDKEILLSSPWLFEELHEIRKQLFIESLKLHKAFIFNSSKRLNLRNLCMHRIISS  
NDWPVSRDILLPHIWGSFFMVVPAMSTTFASFSTLFRGMGRESIGWLLIDEAGQAPPQVA  
SGAIYRAKRSIVVGDVFPQIQPVVTIHEVINNALLNYYNISDQWNCLESVQTIADRANIY  
GTFVGNSENKKWIGCPLRVHRRCADPMFKVANEIAYNNLMIQATESVEPLPGAMASSQWI  
HVPESVSNNNWIKEEGEVVQNLLSKITGELGLPPIIYIISFRNVVFNMKQLSHNLDKW  
CHTQNTQEIKLWINKSVGTIHTFQGRESSAVILLGGDARKPGVFSWASKTPNLLNVAI  
TRAKNTLIVVGNHDKWSKMPFFQVLARSIPKQNIKP

>gene\_702|GeneMark.hmm|146\_aa|-|1420|1860 >NVVL01000034.1 Rickettsiales  
bacterium isolate NORP64 Contig\_source1382A\_19779, whole genome shotgun sequence  
MDQTLRLVQNVETVVIKEMQRAIQLAPHSLSDRPVPRDGGKCAVLIIEGVRATHQLCERLR  
DALRHLLQLSRQILGSGEGDVEGSGVGVVVCVDEGHPEGDSMGRRRSVGDECVWQIGISP  
DLGTDEVVIVSLVALRLGLDRGIIM

>gene\_703|GeneMark.hmm|89\_aa|+|2420|2689 >NVVL01000034.1 Rickettsiales  
bacterium isolate NORP64 Contig\_source1382A\_19779, whole genome shotgun sequence  
MLECCINGDVMRPKLIGGKVFVRGYHLQFMLELFKIEKIEHRMSIKVVVQSVSFASFVHNN  
HDVMKICVDVSPSLYLTSENDNNSIFQK

>gene\_704|GeneMark.hmm|50\_aa|+|4495|4647 >NVVL01000034.1 Rickettsiales  
bacterium isolate NORP64 Contig\_source1382A\_19779, whole genome shotgun sequence  
MKARILDYQTVNQNTLNQLQFELRTIDGKLVGFEGSQNTFINLIFRLIIE

>gene\_705|GeneMark.hmm|86\_aa|+|5313|5573 >NVVL0100034.1 Rickettsiales  
bacterium isolate NORP64 Contig\_source1382A\_19779, whole genome shotgun sequence  
MIYYYYLFP L SCLKEFDNKKEIKVFS DLYIQCVLNSADIHIGGIRHIKLLLYFFIVIDAKK  
KCIILLFYPKK TMLTYKCF SQT SLLV

>gene\_706|GeneMark.hmm|104\_aa|-|5700|6014 >NVVL0100034.1 Rickettsiales  
bacterium isolate NORP64 Contig\_source1382A\_19779, whole genome shotgun sequence  
RETAGVSEVSLRPLERSARSREKPREMQLKHLHAQHFNETVLCSSRRRRELQLARNNQRD  
IKMVVLV P A R P H G E V R E K P K R H K N N T A F Y E K Y K N I L T V M N V I K P

>gene\_707|GeneMark.hmm|110\_aa|-|3|332 >NVVL0100035.1 Rickettsiales  
bacterium isolate NORP64 Contig\_source1382A\_20288, whole genome shotgun sequence  
MQSISSNIKQIAKQLDHMQKRQLPFATSTALNKIAIAAQNSITKAIPFIFNNRKKWVGK  
NQPTGIKVKFANKYELVSAVYTRAYFANIQEEGGIKTPRS GHKLAVPASG

>gene\_708|GeneMark.hmm|148\_aa|-|347|793 >NVVL0100035.1 Rickettsiales  
bacterium isolate NORP64 Contig\_source1382A\_20288, whole genome shotgun sequence  
MAITREEKSNSRLMQLFAPALVGADQANIAAIDVSGFESVLV VANIGAAGDDL NQDN YIE  
IELEESDDNAGFTHCSDESMQDAVAGTNTGTIAHLEAIDGAGISVLAAYKGRGRYIRPVI  
RMTGNHGTGTIIGVSAILRGTKYRPVAA

>gene\_709|GeneMark.hmm|172\_aa|-|1032|1550 >NVVL0100035.1 Rickettsiales  
bacterium isolate NORP64 Contig\_source1382A\_20288, whole genome shotgun sequence  
MKMKTVKLNTAKLNTLKLQTTK P Q T S K L P S P N K N D K R P I A K F H R S W L Q D T L S G T P L E K H R  
GINQAQYAAADRLSSNYQRIFSNGGWSP E E V Q V K Q D Y F R S N G V E R K V Q A I I N H N R I F K Q L  
SKNSQAIIEHFCLNEQPIRAYELKQIPNWPKGAGTARLREGLDELVEIYRNS

>gene\_710|GeneMark.hmm|769\_aa|-|1835|4144 >NVVL0100035.1 Rickettsiales  
bacterium isolate NORP64 Contig\_source1382A\_20288, whole genome shotgun sequence  
MSNIIQMVPNALPQRDQLQTFYVLF G Y S E G L I P C R S F P E S G T D N S Q R P H N I W I D A D E L V  
MDKVVTFAKWTAREKVAFYVIPGIVSKQGQAGSDDIEQM QVLLIDIDSGDTEEK L K I L T H  
AMGQPTMIVESGGITPEGS AKLHIYWQLERPAAGDDLQRLVTLRHIALAAGGDTHFKSA  
HQPIRVAGSIYHKKGAHKLVKIRSYEPLEYNLEELIKSAEKLPLPAQTSTSEKITSPLDY  
NNAARSF D H I I T S K V Y E G A E G E Q S R F S H L Q R V V G F W L R R L H E G A I T Q Q Q A W E E I T G Y N A A  
NVVPAWDEKKLRQLADGLWRKHVKKHGEAAEAREAREIAEPVTNVNTNSNKINAIDPSTW  
HGEPK R Q W L I E D W L P R G Y V T A L Y G D G G V G K S L L A Q Q L M S A L A T G Q S F L G K V Q P K M R V Y A  
LMCEDDASELWRRQVAINKHYGIDMHDLSNIRLVS R V G N D N L L M T F A N D D V G K L T K F F E E  
LQTDILNYKPD LVILDTAADLFGGNENNR P Q V R Q F I Q T A C G Q L A R K I G G A V L L C A H P S E S  
GMQKGTGSGGSTAWNNTVRSRWYLKHPEAGELSSDHRILSKVKS N Y S A K G Q E E Y F K W Q D G  
ALVGLDSAYISKPVIGQKQHKNNAERDRKTQLMLRLIDLEAQQGN I Y T M N Q F A E A F E D Q  
EDNNYGF G S K R S I N E R L S I A S T Q G L M K F F N D P K L Y G I D I K S N Y G Y L C C E N T M L K I G E I I  
DSETGEITDKMIHIKPTHYKCR L N G E L L V I K N S E I K E G E N G E N T T A K K Q

>gene\_711|GeneMark.hmm|264\_aa|-|4207|5001 >NVVL0100035.1 Rickettsiales  
bacterium isolate NORP64 Contig\_source1382A\_20288, whole genome shotgun sequence  
MFGGRIMLDYNKIAKTSSTPINDQLNILIDDALVKIRDTQPKRRYLGASRVGVSCSRL

QYEQSGDSKDRGKGFSGQTLRIFAAGHVFEELATQWLRDAGFELLTNQEDGSQFGFSCAG  
GNLAGHVVDGIIIAAPKALGLAVPALWEMKSMNNKSWKETIRKGLVSKPVYAAQIALYQA  
YMEGAVVGISKNPALFTAINKDTAELYHELIPFDGELAQRMSDKAANIIRATKAGEMLPR  
IASSDYECKMCAYQQRCWGNRQ

>gene\_712|GeneMark.hmm|170\_aa|-|4988|5500 >NVVL0100035.1 Rickettsiales  
bacterium isolate NORP64 Contig\_source1382A\_20288, whole genome shotgun sequence  
MQFNDFNNAETSNFLIRKGTAKVEMKIKPGGYNDEERGWTGAYVTKNEVSDACYLNCE  
FTVLNGEHQGRKVWSLIGLYSPKNDNRWGDIGRGFIRSILNSAKGYSDSDKSDKATGARI  
IKGLGDLDYIRFMAKIDVEIDQDGNKDNVIKTAIDPSHRSYLASDQDVWG

>gene\_713|GeneMark.hmm|111\_aa|-|5490|5825 >NVVL0100035.1 Rickettsiales  
bacterium isolate NORP64 Contig\_source1382A\_20288, whole genome shotgun sequence  
MQIDGSKTELELPQVITMAEITGDDERPYRAFNHTINPYGYPAKDRSGCLEMLEE  
AHLGRLMEKIKRARQDGNLTYDMAKESANNLSEQSNKQSNKQNKENNYAI

>gene\_714|GeneMark.hmm|171\_aa|-|1|513 >NVVL0100036.1 Rickettsiales  
bacterium isolate NORP64 Contig\_source1382A\_20327, whole genome shotgun sequence  
MRQDNKRFRGRLGIFCR LAVLQIAIICSPISAFAGVDKLIKNVFPGTMSNVTRGGVVE  
HQSAGHLMGGSVMIRTPANPDLQMLHVQAPSCSMGGLPCGAQFEFFGGAASLMKLPAMLQ  
HFQGLAKHLGIYAGITYIKTQCSFCEDVLEWMDNKADFLNQLANTNCQDMM

>gene\_715|GeneMark.hmm|347\_aa|-|510|1553 >NVVL0100036.1 Rickettsiales  
bacterium isolate NORP64 Contig\_source1382A\_20327, whole genome shotgun sequence  
MIRNKRTLIRGMILLQLGLAATAPVYAVSSSYESSPSRANIPSSRVVGTSMVMDTSVTGVG  
AYSSTIDGISPSGASSNSTTKGASAFFGERYRGWLWFEEKEALVPEGLAPEAAEADIDE  
EAEFIPPTKEEMQRAKTENDVFKEELELMRHMIRYPENLDYVVMYKKKEQEMHEGARKL  
SRSWVMANFLNPDMTDELENPQNIYGRKLQKSLQKKQDKAALRALSSQIEIFVFRKEDCP  
YCKTLEKHLSSFARMYGFKVEAVSADGSSSQHFHTHTQKELIEALSLDVMPMVI AVTNDS  
SMRFELARGAVSILDLENKSLMLVRYLESKESGSAAGQELNNGRR

>gene\_716|GeneMark.hmm|374\_aa|-|1546|2670 >NVVL0100036.1 Rickettsiales  
bacterium isolate NORP64 Contig\_source1382A\_20327, whole genome shotgun sequence  
MQVKMIARYMIKTVMVLMALCSIWAGSLASSFADTSFRSNYPCHDTGKRCVSSGTRMIDG  
FEVHRDCWEYSYTKKCDYPSKDDCGRYAHCYVLGDRNCLLQDSAGKCVNMRKEFSCKEWD  
AVNDEKHTVRMGLEEKEGARGVVCKGVPCMDGNCVDKSYETNGEMMDSLSKLYSTTQMNP  
DKDGNFNLFPGSHDHCSKKAAGYSNCCRMGKQGWGSNLGAKCSEDEKSLMEQRSKNLCIY  
IGKKTNKVAGVTTLVKHHFCCFGTMLDKVVQQGARVQLGMSFGNASSANCRGLTLEEITR  
IDFSKIDFTEFIDDFRAKFAAKYSPPDAAGIGAHVESVMGDI AVFDENDPNPENNPENNM  
TGWRQNIIDEEDDD

>gene\_717|GeneMark.hmm|405\_aa|-|2655|3872 >NVVL0100036.1 Rickettsiales  
bacterium isolate NORP64 Contig\_source1382A\_20327, whole genome shotgun sequence  
MGVVNLGNIGSLVNSILLMSCISGAILFWCSPSYADHLDPTFRTNENEQTDLFEKNIPDL  
RSFEEQIKSDRENAIHGIGNSESDVKMQGIEALSGKSISEVEAETERLSKIPAMELESTG  
RAKLEDEILDDLWLDGSKPGNIRHKEDAKRLAKAQEGLLANMLGDLKDMGIECGQVRGN



TIREPAYYLQLETISRRPDTRYEQMFCESPREYNCRQFFNVRCTNKVSKPLQAESFATN  
MPVRYAPRTGILTFGWIDNLSHIGECGEVYDYNIEFDLNDLRNVTEFKLLNVSFDDHVRI  
TVNDHQIFMAPEQGDRELTGERSWRSRYFLVKVDESRRYSAEYGTRHNHAPDIDIRRH  
LKEGSNSIKVRLIVGGGGGIWLKFRAKVAECENWGISREEQCRLK

>gene\_718|GeneMark.hmm|271\_aa|-|3872|4687 >NVVL0100036.1 Rickettsiales  
bacterium isolate NORP64 Contig\_source1382A\_20327, whole genome shotgun sequence  
MEEEKLLFYVENRIVKKSLLVLLLLTLVSVMSSSTSSFAKEEEAEVSMETKEWAKGLTEETR  
RMSGETKKWVSELTTLTRDISMDAIKAKWQELQVMRMAKGEIDDTEIDIDNIDSSLTENI  
GLRVFISSMSPSLLRQYGQAKKYGAVLVLRLPTGASGRGSRWKLSELVMTISGTSPG  
GTSAGDASIPDASAEGIGIQLDPASFEKYNITSVPSMVLAREEWSLDDGQEKETGEFDKV  
IGNIGLRAALELFAEDGDLADEARSFLEEAG

>gene\_719|GeneMark.hmm|342\_aa|-|4657|5685 >NVVL0100036.1 Rickettsiales  
bacterium isolate NORP64 Contig\_source1382A\_20327, whole genome shotgun sequence  
MKNNPGNILILVILLVPFTSSASFTCHGHFVNPLSDVCWGCVPPLNIGGFSIGKGSPPK  
KRDTKNPSSPICTRAGVPMVPGISIGFWEVRLVDVTRTPYCMVNLGGIELGSDKSKI  
SAHSRGRGGNGGTHSSFYHVHYVYPLIYWLELITDFMCLEAGTFDLAYMSEFDVTWNDP  
KLQGLLNPELILFANPLAHASCALDCASATISMPIDSMFVCAGCLGSMYPFSGANGAHVG  
GVKTSSLLVTRILAKMHRVGLAQETSTSSAxIDGxICRKSRAFKIKKSQYxxQMVNPKTT  
SGGIGCWPLGxTDMMYSAFKEYPYDGEDWGYLIWRKKNCCFM

>gene\_720|GeneMark.hmm|42\_aa|-|5694|5822 >NVVL0100036.1 Rickettsiales  
bacterium isolate NORP64 Contig\_source1382A\_20327, whole genome shotgun sequence  
MHPHDAPILYGMILLDCKAALQERPDLRKRWSHLGRELLVKVD

>gene\_721|GeneMark.hmm|188\_aa|-|1|564 >NVVL0100037.1 Rickettsiales  
bacterium isolate NORP64 Contig\_source1382A\_20496, whole genome shotgun sequence  
MNFSKEEILIVTKATKTLIVPKGIKKLICTEIGLETILNNEEVVVDxHNNKLAKLTPVN  
SxTHLDCSHxxLTKixVPDSVTHLYCSHNKLAkxxxxxSVTHLYCSHNKLAKLIVPDSVT  
HLYCSHNQLTILIVPDSVSVIHLDCSYNQLTILIVPDSVTHLNCYNNKLAKLTPNSVTR  
LSCSYNKL

>gene\_722|GeneMark.hmm|290\_aa|+|817|1689 >NVVL0100037.1 Rickettsiales  
bacterium isolate NORP64 Contig\_source1382A\_20496, whole genome shotgun sequence  
MKLRIVILFISIIAIITMTSWAVRHSFAPDKHMIWAPDEYVDMMIEDVNGFDTINSW  
YVKNNEKSTCMLFFHGNGNMSWREYMVNMTKEIGVNLFMIDYRGFGKSRGNPTQRSLE  
DGESAYRYITKKYKNCIIVWGESLGGAIASHVASKHKRCLVLLSTFSSLDDVVLEYHG  
NYAIRYLMSLLIKYIVEEMPIKSWIKCVKSPVVIHKSDETIPFEVSNTLFENISHEQK  
THIKIKGKHSSPEMTRDNLMEILDICGISFNGKTITKALKCIDNIKFPV

>gene\_723|GeneMark.hmm|600\_aa|-|1679|3481 >NVVL0100037.1 Rickettsiales  
bacterium isolate NORP64 Contig\_source1382A\_20496, whole genome shotgun sequence  
MDPISHEKQRPSSNKGMEKKRISEDEILNDDRKALEREILNNTSTCSSGTIDLVSWRIS  
PLNILMTKNGLRNYYDPKVMESAACLVNSELDTNKNDVIGLRIKNWLTNLRRISEGVG  
YALSIVGLGNTKDVFMKTPKSGNLLHEFFVGIVGLNKLKRIIPNFVYTLGGFGCPAIV

QGEELVSWCGGSDSDSDVDYILYENVVDQSITLKEFILGGCSTDEYLNIIYQVLYALNIAGK  
EIDFMHYDLHTGNVLVRTISEDEVYVPYKIGESVHYLTKYLAVIDYGFSSIVHKGMDY  
GIYGFEDQGVGRHEPQLVDVTKLLSSSITDYLDKEQPNLGLGVAMGSISKLLDNNQDIHV  
EFTYKMLREFDPKFVTFYKPYNVRVIGCGDVGTTDDCIEYKNVPIMKDEEVKIPSSILD  
LYDICFGLGKEEKYEQFDKMIESFDYKKHLMASMKEINSAHSKIEKSKRKYLKLKSIKRI  
MEFSWEYIPIYFNTKTKDFVNIRVFRDTKVLILLIKSVHYASTIYNDVDTTNRAARYIK  
RTKTNNLRNASTISEMISGINIMSELSYKYKPGYKDKYHKYFYFPLGELKLLMDSIKL

>gene\_724|GeneMark.hmm|685\_aa|+|3579|5636 >NVVL01000037.1 Rickettsiales  
bacterium isolate NORP64 Contig\_source1382A\_20496, whole genome shotgun sequence  
MQVDPTSSLCRVVSSFAPKSEPTNIIPFRLGDVEVKVIQSNKNQIIEYANLKSHSLLES  
IKNRFDNPKFSKSRNLNPFEEIGNSIFMNRAVGKIANVDAVLRLTNIQSGYLNRYSDHP  
LYAAIAEAPGAFVQYLQYRFNNSKGFGLADSEITWNYDLIKCDNFTVYNGEDGTGDI  
LNNYDSFSREVLAEHADGVLDLVVADGAIDSVGRENKQEQDNMKLIYAELLIILTICKTGG  
NCMFKVFDYTKASVHLLTAALSFEIYIFKPISSRPANSEKYVVCINRKENIEKYISA  
LVSCVKNGDNIYSIYTTIPKDFDEWVTKSNNFHLQRQITYGKKIIAHMRNTKIRVDLYDL  
HKCNILWNIPTTPLSDVMYKRRDISSRLSKKYTDDIEPIFVKGTHKHKGFLIQEIID  
GGTIMRGLMPYISSINNTILAWFMSDDTDIVSLSLCAKLNKKKVIFVGYNSNTSGELVK  
ISRSYGAEVKVIHGVSSENTAPSLDTVKKGALSYYKGNNSVHMINKSLGDIRFISKSYSSES  
LNDVIRFVPGRIWISSGNSMYHNIQKFRNVKIIRVTTRHNPRASKEKNVETRGSKTQKN  
YETRVIPIYSSNLMSDGKIWELFLKYGKGDYIWNSSYSPKPLNVGVNDAPTLSFEPIELK  
ISDFGSTKSIGAMKYKVPILSFPGV

>gene\_725|GeneMark.hmm|60\_aa|+|3|185 >NVVL01000038.1 Rickettsiales  
bacterium isolate NORP64 Contig\_source1382A\_21498, whole genome shotgun sequence  
AQEGPTPAQTRKRRLSQVNEEKEDHNRSTISPKHRKGLPALQEKSRREIQEGVRTNRRYL

>gene\_726|GeneMark.hmm|678\_aa|+|679|2715 >NVVL01000038.1 Rickettsiales  
bacterium isolate NORP64 Contig\_source1382A\_21498, whole genome shotgun sequence  
MLAESTSLTVYDCNHDKVTYQAIDLLEPQPCCDDPDTDFMDPTERRVQILNTEKDRRIIAY  
ACQVFVTKIEHFCGFDSISYSGSKITENETPVDITPSVCREAVKGGKMHLTEWGTKYELGP  
TQTYFDHFYSHGSLDNKGHCERETFTSGGIAYTGASESIFINIRLKKIRGILDVSTGLVQ  
FSTGISVPYKDGVLRDQTEGTMVWDLEPPKCDSTLGELYQGKGLLHQKKTGLLSILLIK  
DNQTGQYTGLTLQMPTSICGMECRGTQIXGVVACLLREYDSPLPLVEPXFPPNSLXMDVL  
SQVSYLHLSTNLKMHQNFRELYQQTCLLDREQLVLKQLADEGSPYMLTDLFPPGHRTY  
RAGTVVYIAKCVPLQAKRISYPNCTQEIPVEVDGVRRFADPYNWVLQDHPNEAPCSDLTP  
IRWKLEGQWYCSTPTIRPCDAPDKLQLPPQYPALVPTEFTRGLGTGLFTKIQLQQAHEFV  
LAYMARAPTLAKLVSSATRQMLGGSTLGSPIGIDLEELTDRLSYHLLPLFYLLGNLYHY  
VVAIMIFWVVIKIVTGSSVRAYILWIEKGGGWWILAACWRTAYEVVRSPTLLETTTTTV  
TEPVNQYPCVEQYPLEEGTPDQAYRVSVIHTTIRRNQRQLAVLENLFRHTPIMKRQLY  
EDKGAGEDRDRDSKEESP

>gene\_727|GeneMark.hmm|69\_aa|+|3519|3728 >NVVL01000038.1 Rickettsiales  
bacterium isolate NORP64 Contig\_source1382A\_21498, whole genome shotgun sequence  
MRKEGMPLLFRKKRWRKMGKRQNILLPETSLSLPSRNLLQQSGFDQQACIHVYIQPGED  
PPDEGTGIH

>gene\_728|GeneMark.hmm|76\_aa|+|4053|4283 >NVVL01000038.1 Rickettsiales  
bacterium isolate NORP64 Contig\_source1382A\_21498, whole genome shotgun sequence  
MWANIFVDTMGGKPHYRERNRERSITIGKRNTQKVVKESGCKHWMGTGHKEGSENMKFKSL  
CKCQTTLKTRVGANIG

>gene\_729|GeneMark.hmm|176\_aa|+|4955|5482 >NVVL01000038.1 Rickettsiales  
bacterium isolate NORP64 Contig\_source1382A\_21498, whole genome shotgun sequence  
MSEQQEKMTTGNKAASLEVQDSRKPGAQEESEGPEPEVKKITPGQGPPASGRQQEKKETST  
KPQEEGKKLAEVKAVEATRGTGKPRGKRTVQASDAHRKNPAGIILFAESRQDMSLTDWY  
ERVKNLYRLAYPSRGAYVDGSALLIRRFVGLRNARLSHELMQTPETSLMGTMMSRA

>gene\_730|GeneMark.hmm|27\_aa|-|421|504 >NVVL01000039.1 Rickettsiales  
bacterium isolate NORP64 Contig\_source1382A\_21554, whole genome shotgun sequence  
MLKTALSDFQTKAAAVKAYNALVITT

>gene\_731|GeneMark.hmm|46\_aa|-|679|819 >NVVL01000039.1 Rickettsiales  
bacterium isolate NORP64 Contig\_source1382A\_21554, whole genome shotgun sequence  
VYDQRAREHPVAIAAVIDAQTKVAGLYIGFEAVNDQAMFLQTESRS

>gene\_732|GeneMark.hmm|38\_aa|-|1640|1756 >NVVL01000039.1 Rickettsiales  
bacterium isolate NORP64 Contig\_source1382A\_21554, whole genome shotgun sequence  
MGLNVIVFISNNLSKFKDVVTADISVVKLVFSSG

>gene\_733|GeneMark.hmm|94\_aa|+|2300|2584 >NVVL01000039.1 Rickettsiales  
bacterium isolate NORP64 Contig\_source1382A\_21554, whole genome shotgun sequence  
LIDNSTQAAVDFAKYIRNLNAELEDLEIELDRKREYETKLNGDVAEGAAALKNAQDELAE  
AEKTLAAEIKRCDDLEAFNLKRIKEIEEELVIIG

>gene\_734|GeneMark.hmm|63\_aa|-|3263|3454 >NVVL01000039.1 Rickettsiales  
bacterium isolate NORP64 Contig\_source1382A\_21554, whole genome shotgun sequence  
MSLVTLSTNADPASIDKILNLMEKIQSALTQSKTEDNTDENTAIADWNDEEISLNRISGT  
LTT

>gene\_735|GeneMark.hmm|49\_aa|+|3477|3626 >NVVL01000039.1 Rickettsiales  
bacterium isolate NORP64 Contig\_source1382A\_21554, whole genome shotgun sequence  
LTDDFESKTLFTLDFSSATLLVSMKAFPPTLLILVNELIASLIAAMAAM

>gene\_736|GeneMark.hmm|197\_aa|+|4251|4844 >NVVL01000039.1 Rickettsiales  
bacterium isolate NORP64 Contig\_source1382A\_21554, whole genome shotgun sequence  
MNKLFVAVCLAMLASVTMGTRLRAKSTYEIPEISAIEKSKWGAQLLDTVALQIQSKAPLD  
KINALLQEIVDDLRQQTDDDQYAIMLWCKDEKKRLNADITNAKAAIDVAENKIAKRT  
KAIKEGVALESKLVKQIDTLESHIQHTHDERKKDSEDFAKRDTETNIAIDAIADAITEVQ  
QLVGRVPAPIESAIQKL

>gene\_737|GeneMark.hmm|64\_aa|+|4941|5135 >NVVL01000039.1 Rickettsiales  
bacterium isolate NORP64 Contig\_source1382A\_21554, whole genome shotgun sequence  
LKSSLEFSLSQDQADEKASVDAFDILLNLRNLTANTNLVACKKQLKDDRKNLAIQEG  
VKLE

>gene\_738|GeneMark.hmm|219\_aa|+|1|660 >NVVL01000040.1 Rickettsiales  
bacterium isolate NORP64 Contig\_source1382A\_21885, whole genome shotgun sequence  
FPEIKAQKAERYKQEAQAEMRKDLPQVIKHRKSKIAAIDAELSEGKIPPEKVAEIMEIR  
AGYVDQVSFDQKILDQEVGSVAEESVYLDNVINGAKRGNLSKDKAIVILSKQYPAMLECK  
AVDQNHKGVEQCQQLAGLYGIELNQLGSSKQANQPVRPEKRLTQKKKLPVAALLDDQGE  
LKLEKIAAKVQVRLAKRTKLQHRLTPNVKGEGRGEGQVR

>gene\_739|GeneMark.hmm|239\_aa|+|696|1415 >NVVL01000040.1 Rickettsiales  
bacterium isolate NORP64 Contig\_source1382A\_21885, whole genome shotgun sequence  
VAKSEYDLLEEAERYAVVELVASGNVYKLNHARVHEIHWNSIKFATRSDCSGGFLGVY  
KTLRADGRNDDLGTTLGFLLVGLIVFCNEKVIQAVSDSYKYGYGVPVNDYLAKLTIAIGQ  
YLSDDFDDEANQIIIEEMRMNQGGSLDQLSLKCVAWMQKHREFLDKSAYDVTGGEV GALL  
KMFEAETHSGYLANHGALSRAWHLEAIEPLHLNMNPDDDEQVAVAGAGNQNSDCCCIV

>gene\_740|GeneMark.hmm|1006\_aa|+|1687|4707 >NVVL01000040.1 Rickettsiales  
bacterium isolate NORP64 Contig\_source1382A\_21885, whole genome shotgun sequence  
VQNKPCNPRAMGVLVFGILLTVKCRYMLFGVEIGLDMGIVIGFLVLTAVGMGHGKSVK  
TIKDYGGRNFSTGALVATIVATWASGSGFFVTMSKTYSDGLYMFASFGLGVSFFITA  
FLLVPRMGEFLGKVSIAEAMGDLYGQNVRIITAIAGTIGAAGSIAGQFKVFGNIFSYFLH  
IPNYIAVITAGFIATLYSAFGGIRAVAFTDILQAVAFGIIIPMVGFIIWGEFYNEGFSFS  
QAASDPKFNLDILFDSGNPEFLGMLALFFHFCKPTLSAPAFQRIAIGRNVAQVKKAFLIA  
GACLIFIKIIVWPFLIYSMNPSLESSQLVSYIVDTYSYPGLRGLMIVAIIFAMSTAD  
SRINSASVLFTHDICKVLLPTIKRELLISRLFAFLLGGGAIMFSLVETDLLSIILANSF  
YYPVLPPLFTVFGFRSSSKSVLIGMMAGLVTNIIWKMSPIESVSLAQKIAGPQFALLM  
NAVFLGSHYLLKQGGWVGKDNSYLDKQKIIRERWAAFMSKVRSENPINIKTHPMS  
CDSTYVILGAYFLVFTFTSIYSTHAEMLENKIIITTIYKTMIISSSTMGMYPWIWPLSIK  
TEIKQMVMRVWYPLSIFYMLIVSTFFVLLNEVNNLHFVMFAVNMIVSVILLGWQMALGM  
IVAGVYIGTQFYKYIGVEYLDTSIGSPQFILLYSMLIVVMILIFLKPQEHKKTEHK  
VGELSDEVGTLVTVSSRDSQIITLDNKVSGLEERIDHYTERTTNQAQEIERLGATAQRI  
LNNVNHELRLPVGVMNFAEILHDGLGxLxDEQLKMLSKEYKNSNRLSTMIXNMLDLAT  
xQAKKIELQIKLANFSELVEERLTACRKIYVEEKPLKFIKIEKNVMVPMDENYIRQTID  
NLVINAINFSEKGIKLVIVARQTNFVFTIKDQGIGIPLRELYDVFTPFKMGSNTEKAE  
GRGVGLALCKAAVNAHGGEVKVESSGAGVLFVRVPLASDRGRPRS

>gene\_741|GeneMark.hmm|67\_aa|+|4711|4914 >NVVL01000040.1 Rickettsiales  
bacterium isolate NORP64 Contig\_source1382A\_21885, whole genome shotgun sequence  
MRARGSRCKKRQVAALSNLAPMRINSEYHRPFEGEASAEFLKPVIGASPHMPVLF  
GAIQL

>gene\_742|GeneMark.hmm|70\_aa|+|5132|5344 >NVVL01000040.1 Rickettsiales  
bacterium isolate NORP64 Contig\_source1382A\_21885, whole genome shotgun sequence

VDRAGYEAPILPPNSPDMIHSTGFEEAVNAMTWLIEHYKADEGNESFAIYDIYGCTPLIE  
GSFNSRLYRD

>gene\_743|GeneMark.hmm|481\_aa|-|2|1444 >NVVL0100041.1 Rickettsiales  
bacterium isolate NORP64 Contig\_source1382A\_22223, whole genome shotgun sequence  
MQNKPCNPRMRGLLLVFRILLTVKCKYMLFDIDVIIVAVFLIATLVIGLGHGGDVKTIKD  
YALGGRKFSTGALVATVVASWVSGSGFAITISRTYYDGLYYLVATFGMIISFLIIAFYLV  
PRMGEFLGKTSIAEAMGDLYGTVKRVIIIVASGIMASVGYIAVQFRVFGDIVSYFVDLNT  
LTIITAGLVVTIYSAYGGIKSVTFTDILQFFTFCAVPLVGIMIWSKLGSIDSFSLSNAL  
QVDKFNKKVNLGNPQFWEMIPFLYFVLPKMAPSICQRIFMGNNLEQVKKVFIISAFI  
IIFVKITIAWIPFLIFNVNPDEHTQLISYIMDNYTYTGLKGLIIVCVIAMAMSSADTDI  
NISSVLFSNDICLSFVTSSEKLLLSKIFACVLGLVAIFFALSTTDLLDIILTSSFYMP  
IVSSPLILTIFGFRSTEKSVLIGMGAGFTVVAWKAMGIQANPIAIAMLVNLIIFLMGSHY  
L

>gene\_744|GeneMark.hmm|246\_aa|-|1712|2452 >NVVL0100041.1 Rickettsiales  
bacterium isolate NORP64 Contig\_source1382A\_22223, whole genome shotgun sequence  
LKRGVVAKSEYDLLVEEAAERLEAVELVSKNVVYKLNHYGRVDGRHWNQIKFATRSDCSG  
AALGAYKTLREDGCNDDEGTMLSWLLVGMIIIFGNEKVIQAVSDSYKHGYGVPVNDYLAKL  
TIAIGRYLSDDFDDKANQIIAEESRMNGGVSSLDQLSSRCITWILDNLKFLKKSAYELTH  
GEIGALLKMFEAETHSGYLANHDALSTEWHLTYIEPVHLNMNPDDDEQVAVAGAGNQDSG  
CCCVIV

>gene\_745|GeneMark.hmm|394\_aa|-|2473|3657 >NVVL0100041.1 Rickettsiales  
bacterium isolate NORP64 Contig\_source1382A\_22223, whole genome shotgun sequence  
MANNSEKTLKNIHQQLDTRLNDVQTDAMIAMIKSFQKDLANMNVDLASKSSVSSLNTP  
NLPPEVAGALELLLASIAKHSAAEAEKMIIEERIIQEELKHARNSGVSAEEVRKEYERNE  
KLAASIDixVxEYSEYKALFxYRExDLAISERIRDGVELTPxDRAWVFDENxEQFPEIK  
AQKAEYRKQEAQAEMRKDLPLVIKHRKSKIAAIDAELSEGKLPENVAALLEIRAGYAD  
QVSFNQRILDQEVGSVAKKSVCLDHVISGAKRGNLSKDKAIAVLSAQYPAMLESKSLDQN  
HKGVEQCQQLAKLCGIELDQIGSSKQANQPIPRPEKRLTQKKKLPVAALLDDQDELKLR  
IAAKVQALAAKRTKLQHHSTPNVKGHGQDEGQVR

>gene\_746|GeneMark.hmm|87\_aa|-|3797|4060 >NVVL0100041.1 Rickettsiales  
bacterium isolate NORP64 Contig\_source1382A\_22223, whole genome shotgun sequence  
LEKLGARGRMLFSQKHILPEIIRSKKLARSINITSSITKELIQAYTREAGVRDLAKLP  
KSLIQKPLLEKARTNKPTLNKALLS

>gene\_747|GeneMark.hmm|92\_aa|+|4149|4427 >NVVL0100041.1 Rickettsiales  
bacterium isolate NORP64 Contig\_source1382A\_22223, whole genome shotgun sequence  
MANADVRLSRNSTTTYFTTSLTIKLSMFAHIARGNFSIPTPPPIQKGGGLCSGGNAAGAC  
CEKRLKRAQEIMVDIHILIFTLQTYAIYITLV

>gene\_748|GeneMark.hmm|91\_aa|+|4466|4741 >NVVL0100041.1 Rickettsiales  
bacterium isolate NORP64 Contig\_source1382A\_22223, whole genome shotgun sequence  
MEVRLRVGSKLKNADSIFQEMGMTMSEAIRIFLTQAVNSGGLPFRPHLTNPSTTIQAF

EDVDSGDFEEMSIEKFSNYLDGIEGEKSKNS

>gene\_749|GeneMark.hmm|57\_aa|+|5017|5190 >NVVL01000041.1 Rickettsiales  
bacterium isolate NORP64 Contig\_source1382A\_22223, whole genome shotgun sequence  
MSNAQKKYTSEFKSQAISLVRDANLPASKVAKDLNINVNTLYNWLRVGSYRAFALRL

>gene\_750|GeneMark.hmm|31\_aa|-|2|94 >NVVL01000042.1 Rickettsiales  
bacterium isolate NORP64 Contig\_source1382A\_22761, whole genome shotgun sequence  
MAKKSEITNESNIVNIAGKSNLAGRNAAIMF

>gene\_751|GeneMark.hmm|282\_aa|-|879|1727 >NVVL01000042.1 Rickettsiales  
bacterium isolate NORP64 Contig\_source1382A\_22761, whole genome shotgun sequence  
MKDRVMINKLILLLLVLVASFAGARPPIAVSITPVASILKMLTGDAAEITINKSAGCP  
HHYQMKPSDKSRFSDAEMLI FIDEKFDGFGKLSAQFQGEIVQISEIDDIDFSDDQGKIN  
WHFWLDLDNVIILSEYLAKIIIEKFPKLGIVDINGKDALVELRTLAQVKKITLSSLSL  
VVLSDSLEHFFKNSDAKILKLYQRTHSSLRDVKLSHALGKNKNQCIVIDAGQNPLTYVK  
FDKKIQLDSENWVVEKNDPVKESLFCVRYLRMLNQLQECSH

>gene\_752|GeneMark.hmm|402\_aa|-|1724|2932 >NVVL01000042.1 Rickettsiales  
bacterium isolate NORP64 Contig\_source1382A\_22761, whole genome shotgun sequence  
MKILDQHLAINSKNFRTIIDHLVSFGGKARIVGGAVRDGLLDVPSSDIDIATDLPAEQVT  
EALKAHNIRVIPTGIKFGTVTALIRGETFEITLRRDISCDGRRRAKVKYTKDFAEDAARR  
DFTINALSYCPSEEKIYDYFDGIKDLKAGRVVFIGEPEQRIGEDYLRLRFFRFSCRYAK  
EIDQEGLSACVRHKDMISILSGERIKSEIDSLLQLDGAPEIVHAMYESGILQQAFPVKTY  
NHQMHVKALEVAKSGVSLDVLVIYAILFMDCAFSLNQIVKLFKSKAEAKLVVSMIDLQN  
DSTMMEDSLRKIWLEDRGFIQHSIFASVIKHENESDLESINKLYERLQLLERPLFPLRGR  
DITPLGYSGKELGNAINLLKTKWIQSEFTASRDELINLVREK

>gene\_753|GeneMark.hmm|391\_aa|-|3084|4259 >NVVL01000042.1 Rickettsiales  
bacterium isolate NORP64 Contig\_source1382A\_22761, whole genome shotgun sequence  
MTEVIEEIKETEEAVIWEFVVGQALVAEENTATKTPTPPADRPKSTSKNNKKRSPHDK  
LFKAIFGNEASARGILKKHLPEDIKLLDLHLEIERDTFVSEDLKESMSDIVYKIKTKN  
QKKDGDVILFLCEHQSSNDKMMFRLWKYSAISAWEPYLAKNEPLPIIAPLVLYNGKRKYS  
SYRRFWDLFVNSELAEKIMAGKCQLIDLQSMSDEEILADKEFGLFKFFMKNIKRDNGIXL  
WxECFKKFxEHIKLDKEQELFYTKLLWSYTxXKxPIERKDELVSFMLKQINKIGNNGEKV  
MKTIAADGYRDEGWKDGLAEGREEGREGISIGEERGEKKGKIGVEVERKKTVMARMLKEN  
FAPKIISSITGMSQRAISKLRSQLKLGELA

>gene\_754|GeneMark.hmm|202\_aa|-|4535|5143 >NVVL01000042.1 Rickettsiales  
bacterium isolate NORP64 Contig\_source1382A\_22761, whole genome shotgun sequence  
LKQYTKKHGDSLPGNLVDFFWNARLHEHVGSAKAELIKSYNSHIIMNKTCLYAFNSIVS  
LLKRSFCEREPHNNLFPHELLQFMDKMKYEFSEFADYIKLELILSEAGYELQLNRCVAVTGE  
SKDLYYVSPKSGKAVSKQVGPYAEKLLKLPNFKQDARGEAEELTSIEKKTAAELTSYFF  
NRYVMHKGPEPHARTCFEMML

>gene\_755|GeneMark.hmm|123\_aa|+|2|373 >NVVL0100043.1 Rickettsiales  
bacterium isolate NORP64 Contig\_source1382A\_22818, whole genome shotgun sequence  
LGLLLASVGITLVGGSIMNSSHKASKKTEIHLRVIREVERANANGHVVKGYEDFLAKVE  
RRVLREEVIGFKPYVSQPNDSWGRMIMFEYDKNKNQLIILSYGKDGVEGGDGEDADLSEV  
VQF

>gene\_756|GeneMark.hmm|325\_aa|-|803|1780 >NVVL0100043.1 Rickettsiales  
bacterium isolate NORP64 Contig\_source1382A\_22818, whole genome shotgun sequence  
MRHLQIKIYRRNTGHHILSFIHPKTKKRKRKFKPTKKEAKDYREEIEREFQTRGVHAFND  
QTVAQLMQLHIEKCPATRVKERMNSFNSFLDNFGAYPVNEVGKNELSLWFEGLRKHDYS  
TRTLKHIKSELGHFFNFLVDEDISSSPLLLVGFGTSPPPKRKRVLVSVDEVHGLLELVK  
IWDSACLYPFMVALAHTGARRSEIARLKREVDVDFSMGLIHLHETKNGEDRSVRMSDELTT  
MFSIHLVSHTSAFAIPDPTGAKLGDSLIYKCMKKFKLHPNGKEWTFHSFRHSFAFNLYK  
SGGQMYQLQAILGHKTINMTIDLYG

>gene\_757|GeneMark.hmm|128\_aa|-|2302|2688 >NVVL0100043.1 Rickettsiales  
bacterium isolate NORP64 Contig\_source1382A\_22818, whole genome shotgun sequence  
VSRTKHEKTSHTLPTCEDRSSEQHKQAAPDPPAPELQKNLSNLLKLLCQHGLTERELA  
ERIGASQGHINKLKNHARLSNIDYLVRIAEVFGVSLEQLLTSPGHAPPITHEGKQKLLK  
ITVYVVEE

>gene\_758|GeneMark.hmm|103\_aa|-|3197|3508 >NVVL0100043.1 Rickettsiales  
bacterium isolate NORP64 Contig\_source1382A\_22818, whole genome shotgun sequence  
MRLNKALERKNWGHQQLCDVVSKASNQKLRRTLEHWLNHKKCSKKFHFFLPFIADALG  
TTVDQLLYGHELTVKNNLLEIQRDLTLKIINADSLPKSLKR

>gene\_759|GeneMark.hmm|102\_aa|+|3863|4171 >NVVL0100043.1 Rickettsiales  
bacterium isolate NORP64 Contig\_source1382A\_22818, whole genome shotgun sequence  
MWTvxYSRQAAKAIAKxxGxNKLSDARGALDHLDEEDGPTQNTWPHYSKLNQKKG  
LDKRHCHLVIRGNPTYVACWEVINTKKKVMVYAGTHEKAPY

>gene\_760|GeneMark.hmm|128\_aa|+|4152|4538 >NVVL0100043.1 Rickettsiales  
bacterium isolate NORP64 Contig\_source1382A\_22818, whole genome shotgun sequence  
MKKHLTKNDITILVRGEAIELKDSVSSLANIIGELVGDSDSASEVHGDWLN SPRMRVA  
KYLKGVNRKEGLTQGDVCKKLGIQSNLSKMEGERSIPPTLVGKFSKLYKVSVKRLQET  
EQKKKKAS

>gene\_761|GeneMark.hmm|118\_aa|+|450|806 >NVVL0100044.1 Rickettsiales  
bacterium isolate NORP64 Contig\_source1382A\_23026, whole genome shotgun sequence  
LIFVFEKTDDRMSQFVSNILPALFGAFTATDANDKIREKVLMMNVYLCLRTFAWADGVNDE  
LVHTCFDDTFNTWMALFIQIQSNPKSLFDLKRVSCLKLTVIFRDFVNYSKDSINLIL

>gene\_762|GeneMark.hmm|29\_aa|+|920|1009 >NVVL0100044.1 Rickettsiales  
bacterium isolate NORP64 Contig\_source1382A\_23026, whole genome shotgun sequence  
MKNQTSKSQLQKKEALNQMTKKTNMEQKA

>gene\_763|GeneMark.hmm|29\_aa|+|1147|1236 >NVVL0100044.1 Rickettsiales  
bacterium isolate NORP64 Contig\_source1382A\_23026, whole genome shotgun sequence  
MEEPNTYVADQDDEMSLRISIRNASLDLIS

>gene\_764|GeneMark.hmm|53\_aa|+|1960|2121 >NVVL0100044.1 Rickettsiales  
bacterium isolate NORP64 Contig\_source1382A\_23026, whole genome shotgun sequence  
LIDLFRLWSGFTKCLDIMIAMFTPFIVEIHKNYHFSTKGGVVVDKAVVDSSIL

>gene\_765|GeneMark.hmm|105\_aa|+|2482|2799 >NVVL0100044.1 Rickettsiales  
bacterium isolate NORP64 Contig\_source1382A\_23026, whole genome shotgun sequence  
MSVITKILKSRMPSIVQSLALVFARLIHTNPTEIFSLSSTSIENRISLKIVLDKWLLHQ  
PLFRGSYAKAVTLSALLNMFLSRDHRIENLMVIGYNPSHTNINSG

>gene\_766|GeneMark.hmm|66\_aa|+|2824|3024 >NVVL0100044.1 Rickettsiales  
bacterium isolate NORP64 Contig\_source1382A\_23026, whole genome shotgun sequence  
VSAPFKILSVLLRFLDLNDAPKPSGDMREFRMKRDFEDERLDTMGEDDNEEDYGDEDAGG  
QDEMQM

>gene\_767|GeneMark.hmm|52\_aa|+|3255|3413 >NVVL0100044.1 Rickettsiales  
bacterium isolate NORP64 Contig\_source1382A\_23026, whole genome shotgun sequence  
LNSYADINIKEHLGEKLFIFYQGNKDYVRYCVKQLPKEDQDIAKRLIFAKE

>gene\_768|GeneMark.hmm|397\_aa|-|3455|4648 >NVVL0100044.1 Rickettsiales  
bacterium isolate NORP64 Contig\_source1382A\_23026, whole genome shotgun sequence  
MVPVGPECLGRILNVIGEPIDEKGPVNAKMKLPIHREAPPFDEQSGDEILITGIKVVDL  
LAPYQRGGKIGLFGGAGVGTVLIMELINNVAKKHGGYSVFAGVGERETREGNDLYEMID  
SGVIDPVGNKSKAALVYGQMNPPGARARVGLTGLAIAEYFRDEEGQDVLLFVDNIFRFT  
QACSEVSALLGRIPSAVGYQPTLATDLGALQERITTTKKSITSVQAVYVPADDLTDPAP  
ATTFAHLDAQTVLSRALTELGIYPAVDPLDSNSRMLDPSKVGQEHYDIARGVQKLLQDYK  
SLQDIIAILGIDELSEDDKLTVARARKVQRFLSQPFMSEIFSGKPGVFVELTDTKEGFI  
SLLEGGDDYPEAAFYMVGDLDKQAQDQGRKMAEAAEK

>gene\_769|GeneMark.hmm|57\_aa|-|4676|4849 >NVVL0100044.1 Rickettsiales  
bacterium isolate NORP64 Contig\_source1382A\_23026, whole genome shotgun sequence  
VIGAVVDVQFDGNLPPILNALEVEDCDYRLVLEVAQHLGGNTVRTIALDSTEGLVRG

>gene\_770|GeneMark.hmm|85\_aa|+|2|259 >NVVL0100045.1 Rickettsiales  
bacterium isolate NORP64 Contig\_source1382A\_23472, whole genome shotgun sequence  
GFIASGIVGLFRFPDFYTKIHAAGVIEVCGLPFCFIGLALMQSDYTSTFKLVAIAALIFL  
LNPVSTYALARAAMPVKLDEKGRVK

>gene\_771|GeneMark.hmm|193\_aa|+|261|842 >NVVL0100045.1 Rickettsiales  
bacterium isolate NORP64 Contig\_source1382A\_23472, whole genome shotgun sequence  
MAEFFELPFKLDMMSEILLVISSIVVLATCIKLISRNMLESIHMSVFSLFISICYLL  
MDAPDVAMTETALGACLSSCVLINVTNIVGENAGNPPQKMRIILSALLCAAFIACLTAA  
IDLPEFGIADSPLQTHLTAHYMENTKKDIAIPSVVAAVLASYRGFDTLGETVVILIAGLA



VLVITTRRRKNA

>gene\_772|GeneMark.hmm|160\_aa|+|835|1317 >NVVL01000045.1 Rickettsiales  
bacterium isolate NORP64 Contig\_source1382A\_23472, whole genome shotgun sequence  
MLKEFKNLRVIIAFIIPYILLYSVYIQLNGEISPGGGFQAGVIFGSGIIAFDMVFGKKAL  
AMHFSTTGLTLCAILGVFIYAGTGVVSLIFNDNYLNYNAINVINGVTVGNGIGDTVGN  
TLAQGNIVGQHIGIFSIELGVGLTVAAVMSLIYSLLREDA

>gene\_773|GeneMark.hmm|119\_aa|+|1336|1695 >NVVL01000045.1 Rickettsiales  
bacterium isolate NORP64 Contig\_source1382A\_23472, whole genome shotgun sequence  
MHNLIYFFAVIILTSGLFIMLTSDNYIRKIIGLAIFQSSVLIFYIALGKSAQGIVPIDIC  
EKTSSCLHVFSSPLPHVLMMLTAIVVGFATMAVGLALIMQIHTEYGTILESKVTQHEEDI

>gene\_774|GeneMark.hmm|488\_aa|+|1699|3165 >NVVL01000045.1 Rickettsiales  
bacterium isolate NORP64 Contig\_source1382A\_23472, whole genome shotgun sequence  
MIIATHIPALQIPLFAALFAALTYNRFAAWMIATISAALGFALSIYAMPFAHEGMSYA  
FGGWNAPIGIEYRLDLSLSQPIIVFINAILLLFLAFGRELIDSSITEYIEKKHQHLFYAIL  
LFAHFGYLGVISTNDLFINIYVFIEISSLATYVLMASKGRTPRALVGAFDYILIGTIGATLI  
LISIGFFLAMTGLNITDVANILSKKAASPLITIAILFFLTGAILKMAFFPMHFWMRRAY  
SSAAPFMLTYLATISSIFGVYLILRFVHFTVEQQNIQEMLSQILRPIAIGTIIICTLLAL  
KARNFKDIVVYSTAAQIGYIFMLITIEPAKHLLFQFLILDALSKVALFTIIAHIQNKSDS  
LNLESFASIEGAGFFKFLVALALMFSAGLPMMASTFIVKIQIFDLLARNHMMILEFVTVILG  
SVFALHYHFKLAKAVFFGSKSKHTIQIKTKSYGLAFIVLIQILTIIYIHDLASFALNTES  
FIQKIATI

>gene\_775|GeneMark.hmm|512\_aa|+|3162|4700 >NVVL01000045.1 Rickettsiales  
bacterium isolate NORP64 Contig\_source1382A\_23472, whole genome shotgun sequence  
MTQFITPEFLVIGALLVGMMNLFTPFISKEDSPVRSFLISVSVIFLINILLDDYLFSLG  
IEVNFTLFEFGKYTIALHLEPLGMIFLTLSSVLWICALLYTIKFLAINEIENSDFLFFV  
NCCVLTGSIVALSANLFTMFAGYEILTCTIPLIAHKRSQAVSDGLFKYKILMTTGLLL  
FLPAIIVYSSIGHGNFTYGGFIAGHFSDANAIILLLFIFGSKAAIYPFHSLPAAMV  
ASYPVSALLHAVVVVKTGLFCYKILAYVFGLAYLQTLFADYNWLVLLPIFTIIYSSLQA  
IRYTELKMILAYSTINQLSIALLSAFLTPKGLMAAVIHMVSHSFTKICMFYAAGNMYSV  
KNSYNIQELVGIKNTMPKTSFVMLIAGLSLIGMPPFAGFISKFYIMMAAAEQENLLVMLI  
LLVSTAFSALYVIKIIIFIYRPTNDEFILHLKLPYFNEPISHRSSKRIISSKHKAEKHL  
PTFMILSIALCLSGVVGFFLIQQAIKFLMFL

>gene\_776|GeneMark.hmm|546\_aa|+|4740|6380 >NVVL01000045.1 Rickettsiales  
bacterium isolate NORP64 Contig\_source1382A\_23472, whole genome shotgun sequence  
MIYHPTIIILTSILVLILSYRKEKLFASASLIMPIIAAITLYTMPTQSGFEFFNLNLVCE  
GTPYKNLIGFAFLVLFSANLYALGQKKKLELMLGSAYAASTLCALFAGDFISMVFGIEL  
MMIFSAAIIFIGRRKSLRSACKYFLTHLMSSNMIVIGIVHIITKEESIALIPVVDLLTS  
PKHSHAMIIIMLTGMLINIAAFPFGSWMVNYYPKASPAGFLYLISFTTKLSIMLLIKLFT  
GYESLKYIAAIMIYASIKAVFEDRLQSLCYLSIMAMGLMMLLGISHGSPLAILATVSYL  
FIHIIYKALLSISISSIIDHTGIKKCHDLQRINCKLTFFAITGIAIMINIPILSSFYVK  
STISHLYEGTIFYNLTIFLTAMTIITIPWKKYLHAKESMDINLNKHASLSILFMLIVALI  
VGISASTMPIIGQLDNFRELLLSQDTLNQGIHIIAALFVTLIYALPRKKTYPINLTEYL

GDVFFYCYWRLLNRSKEDSSKEPWMIHSLERQITSKINAIHNQQTAIFIVFAGFVILLG  
ASLALS

>gene\_777|GeneMark.hmm|69\_aa|+|6450|6659 >NVVL01000045.1 Rickettsiales  
bacterium isolate NORP64 Contig\_source1382A\_23472, whole genome shotgun sequence  
MLAKAKVSKVRKTLHLHNGDKVSIKYSDELVSTFHSNVEKARNILKNYKEIDFQQELK  
IMRKKEAGY

>gene\_778|GeneMark.hmm|262\_aa|-|6751|7539 >NVVL01000045.1 Rickettsiales  
bacterium isolate NORP64 Contig\_source1382A\_23472, whole genome shotgun sequence  
MIIVDSHCHLDMLSEHDDIDAIVARAGEAGVKYLQCTICRLDNFENILKIAKKYDNVFNAS  
VGIHPSEVEGAADAKELVNLARDEKVIKGLGETGLDYFYNKEPGHHALQQASFEQHIIASQ  
ENKLPVIIHTRDAEQDTIDIVTAGKKHQEFPLIHCFTASKEFAKAMLDLGVYISISGIV  
TFKNAEAIREAIEYIPLDRILVETDSPYLAPVPRGKTNEPSYTRYVAEFIADLKGVSLE  
EVSLQTTQNFFDLFTKAKAQAS

>gene\_779|GeneMark.hmm|510\_aa|-|7536|9068 >NVVL01000045.1 Rickettsiales  
bacterium isolate NORP64 Contig\_source1382A\_23472, whole genome shotgun sequence  
MSSKNFYITTPIFYVNDVPHIGHAYTSLACDVVARFMRLEGLHVKFLTGTDEHGQKVEAS  
ALKAGVAPQEFQDKNSARFRDMMGVLGVSNDDEFIRTEEKHKKSVLAFWKKLEENGAIYL  
GKYEGWYSVRDEAYYAESELTEDGLAPTGATVEWVEEPSYFFALSKWQDKLLAYEENPE  
FIWPNSRRNEVISFVSGGLHDLVSRSFKWGIPVPGDPAHVIVVWVDALVNYISALGYP  
SADGDFADYWPAAAHVVGKDILRFHAVYWPFLMAAGLELPKSIISHGWWTNDGQKISKS  
LGNVIDPFGLVDEFGLDQVRYFLMREVNFGNDGNFSKENLVLRNSNELSNKIGNLLQRTS  
AFVYKNCDAKIPDVDEAYVTEVYETDLFKEILSIVSANAGYMEKFDINKVLSNIIHITEA  
ANIYIDKEAPWALRKTDPKMKKVLVLLLEVLRYIAIMMQPFTPDSAKKMLDQLNIPEDA  
RMNANLTMEFALSAGASIKEPTPIFPRLER

>gene\_780|GeneMark.hmm|39\_aa|+|9123|9242 >NVVL01000045.1 Rickettsiales  
bacterium isolate NORP64 Contig\_source1382A\_23472, whole genome shotgun sequence  
MVLVQVVVLEIWTGQPCLAAKTLDTLEAMLAGLKYRVL

>gene\_781|GeneMark.hmm|256\_aa|-|9263|10033 >NVVL01000045.1 Rickettsiales  
bacterium isolate NORP64 Contig\_source1382A\_23472, whole genome shotgun sequence  
MEKINWYGAYSLTLREVKRRCRVYNQITLTPVVSSLIFLSVFLAIGQNRPDISGIKFIN  
FMGYGLIAMSIIQNAFANSSSSFVMSKVLGYISDILLPPLGSVEILIAFTMGAVLRGVAV  
GIAVTLALAPFIEYSLHHPVLLVFYVLASCTLLGMLGILTGMISNSFDQFSAVTSYIITP  
LSFLSGTFYSVKALPFIFQIINLLNPFYIIDGFRYCITNHADGNITAGISFLIASNIIM  
YVVLIRLIDKGWRIKA

>gene\_782|GeneMark.hmm|446\_aa|+|10148|11488 >NVVL01000045.1 Rickettsiales  
bacterium isolate NORP64 Contig\_source1382A\_23472, whole genome shotgun sequence  
MLKKLFIKTYGCQMNVDYSIKMQEILAPFGFESTEDMNEADMVILNTCHIREKAAEKVYS  
ELGRVKKIKDARKTQGLSDMIIVVAGCVGQAEGDEIFRRAHYVDIVVGPQSYHTLPDLLA  
KLARSEKRLIDLDFVEAKFDNLQPQNYQGGASAFVSIQEGCDKFCYCVVYPYTRGAEFS  
RNVEEYRESMVASKEGAKVHLLGQNVNAYHGKTHEGKRHSIADLRHIATLSDIERIR  
YTTSHPSDMTDDLIALHGLEPKLMPFLHLPVQSGSNKVLKGMNRKHSIEEYLSIIDKLRV

ARPDIVMSSDFIVGFPGESDEDFADTLDLVKKVQYGCYSFKYSPRPGTTPAATMEQIPEE  
IKTERLAILQKELSRQQFEFNESCIGRILPVLFEKNGKFDNHIVGKTPYMQSAYIENADK  
SLIGRVVDVKITKGLAISVTGELVKN

>gene\_783|GeneMark.hmm|788\_aa|+|11603|13969 >NVVL0100045.1 Rickettsiales  
bacterium isolate NORP64 Contig\_source1382A\_23472, whole genome shotgun sequence  
MLLRLLIFCSKLALFFGAIGVVVAGYVIYYYSRDLDPDYSQLKLYHPPSITRMYSSDGKLI  
EEYAREHRVFPITSIPKPLIEAFIAAEDKNFYHHSGVDFVSILRAAITNVSHILNKRRV  
EGGSTITQQVVKTFLLSSERSLERKIKEAILSMMSQLFTKDEVMELYLNQIYLGKGAYG  
VALGALNYFNKSIEELTLNEAAVLASLPKAPSKFNPAVNYKRAFVRKNYVLGRMFDDGYI  
TEEQAREAIAQPITLAKFNKVTIDADYYAARVREEVINMFGKEYFYTAGLTIMTCVDSN  
IQKHAARALRAGIKRYDTRKGYRGAIKNIDLINWQDDLAMPPIPIGLRHYKLAVVLGVTD  
VAAKVGLRDGSLKTLRIRDMKWAKTGLASVRELLKSGDIIAVERKGGKYLQQIPEVNGG  
IMVVDHRTGRVLAEEGGYDFGFSKFDRTTQANRQPGSLIKPFVYLAIEGAHPNDIFDD  
APIELEQGPGLPLWMPKNHDDKFLGKMTLRKGLEKSRNLVTVRVGQFAGINKVAETIKRF  
GINDDPLVVQSIVLGSIEETLSKMTMAFGALANNRKRKIEPHYIEFIKDRKGNVIYKRKYA  
ECSECKSYKLEDDNAIVPKIEITKGAALTDEASSYQMTSLMMGGVQRGTSRKAKNLKHV  
IAGKTGTTNDARDVWFMGYTPKIIVGTYVGYDQPRTLKRAYGANIALPIFVDFMKGKGYK  
NAPLVDFIVPDSVALLSVDYETGKPKSTGENSIIESFKADDYNPFLEKIKRKYKPLIKIQE  
RDSSEELY

>gene\_784|GeneMark.hmm|306\_aa|-|14166|15086 >NVVL0100045.1 Rickettsiales  
bacterium isolate NORP64 Contig\_source1382A\_23472, whole genome shotgun sequence  
MAGLLSRLKTALGKTSSKIGSSLDHLFIKKLDDAALEEELEDMLIFADVGVQVSAEIIISL  
LRARKFDKEVEQDEIKQDLSVIIQILERQDHFELKQGLNVILVCGVNGNGKTTTIGKM  
AASYASAGKKVAIAACDTFRAAAVGQIETWAERSGARLFSGADKADPASVAHRAISESIS  
SGVDILFIDTAGRLHNHKNLMDELAKIIRVIKKVDDSAPHHLLVIDGTTGQNASVQVKE  
FKALADISGLVITKLDGTAKAGALVGIVQKFELPVHFIGEAAADDLKKFVAKDFARALV  
GLSEEK

>gene\_785|GeneMark.hmm|922\_aa|-|15090|17858 >NVVL0100045.1 Rickettsiales  
bacterium isolate NORP64 Contig\_source1382A\_23472, whole genome shotgun sequence  
MNNARKILLFLSCLLWVQSVCAVLP IQMEVKVFGKDVIFVYRDKDQVTFHIKDRSVSS  
KFSIPSEFSLNLSEFNKYASNLRVFPKQKISFRANKNLQYQSIINGEKLDAIKFRLKD  
KVKTQEDDLKIGSANNDPGTISYAKNKQNHVLLFNLGNKKS KIASFFRGKYLWVFFDQK  
KIFSFKKNKFFSKFMIPSEHGSAMRIKIDPKFAHARLVRSKLGWNISLSESAHKKTGAG  
AGSGSIITPKSLQGEDGIIKGFENDELISCEDPELGDMIVALPLKQPGRKVAVQKDAV  
EFSLLKSLQGIADVLYSDDVLVEKYEDGLRISSDATALPDDMMIEADAQPLRADEYINLPT  
ILPYLDKGLDILDFNKQKSRLIMEASLAKNKIEAFQHNLALARFLVQELYHESLDAVRV  
AQKYSEDEYKSNLQARFLKAVNYTMVGEYLA AKELYEELLSYDVRKIAEISIWNNYNNF  
SLAISFDKIGLLENLPKTIHLYSDDKYWGLVFAEVEIALLENDLKTVERVFKEIRKTRG  
KYANSLKFYKANYRKKGQINLAIQYYTDLTFQEKDIFNKVRAEFDLAKLVREEKITHA  
DAIKILNRLRYEWRGDRLEYDILTQLAAYYREAQDIMNSLRTHYIQTAFNNKVSNFYIT  
SEMARIFNEVFLPGGLSKEMDDFTVVALFYEFKELNPIGEQGDVILSIKRLVHLDLLE  
NAAELLRHQVSFRLKGEKRVKNADNLA IILMMDKKPEAMLVLDNTDKDNFSFKEHEYRV  
RLRAKGFHMEKYEALDCLNDDVSEDAEIRREALFQGNWSRYAERISSDFDGLISR  
V  
GNDDFAAQDILRLAISCYMLNIHDQLVVISNAVGDNNKRLKNVVDLLISGSGSVDYKNLD

ESLDIDQMKMLLDKYKNQFLGK

>gene\_786|GeneMark.hmm|56\_aa|+|17939|18109 >NVVL01000045.1 Rickettsiales  
bacterium isolate NORP64 Contig\_source1382A\_23472, whole genome shotgun sequence  
LIYRAAFASNYKIMVIKHLLEAAPVGKYTGFLKALCATWGTPTSGCAQSFQACFDK

>gene\_787|GeneMark.hmm|528\_aa|-|18305|19891 >NVVL01000045.1 Rickettsiales  
bacterium isolate NORP64 Contig\_source1382A\_23472, whole genome shotgun sequence  
MLDKIRKGSDDLVRVLLAIIAFSVGGGAAVFMGGNSQGDVISFSDTKSISMEDFQAAR  
TREIDALQRQNGINLTDENIEELGINSSILRKLINDSMIKYLARYYDFDISDEKIIDFVK  
MTPFFKDKNGEFDRAAFKAAFNPRKEEYLASHKHLVTSTLVEVFMSSFNPPKIMTEN  
MVDYMAETRIVDLLSINLGSKPAGYKAPNLSDEQLEDYKKNQDQFVVPPELRSFDYIKVD  
RKFLSKKLKISAKELRKYFNENKEEFSSKHAKVKEVKELVSKAKLDELSELVKNLEE  
DASGGFTLKEIAKKYALKVKNVRGKSFDELSGKVKDHAELVDNIFEMSEGEVSSPIERS  
DNNEILMVALNSIAAQRQQEFVEVRKEIKKFLKRELAANVKKLEAIQKTYSPKKINRK  
KLKSNSITLVNKSSTRADLPLEKKLPANLLKGIFGAQKNTVTALVGDGKKVYFAYVKKV  
TRSNAAKKIRKTSSSHFADTIKEGLFNELIVFMTKKNKMKITGASEE

>gene\_788|GeneMark.hmm|237\_aa|+|19970|20683 >NVVL01000045.1 Rickettsiales  
bacterium isolate NORP64 Contig\_source1382A\_23472, whole genome shotgun sequence  
MKPIFIANWKMNLSLQEATTKAKHIEAQNYPTQFLAIPATYLAYFTKTFKKITFCAQDV  
SVVSGFGAYTGECSADMIKSAGVNYSVIGHSEKRELVESNRRIIRKKAENCTRAGIVPII  
CIGESLESRQSGHFQEFLLQLNESIPGNAQEIIIAYEPLWAIGSGIPTIEEISAIHFH  
IKSSKDVSMVAKKARLVYGGSVNSGNREILNIPDASGVMLGASLKETELDLILNL

>gene\_789|GeneMark.hmm|106\_aa|+|20704|21024 >NVVL01000045.1 Rickettsiales  
bacterium isolate NORP64 Contig\_source1382A\_23472, whole genome shotgun sequence  
MINTLLFVHMIISALLIVVILLQKTSKDGLSGIGGGNNMGVVSGRSAATFLTRTTIILA  
VAFFANALVLANLSAKRQESISAKIQKTERNATKADSKSSLPMAK

>gene\_790|GeneMark.hmm|273\_aa|+|21046|21867 >NVVL01000045.1 Rickettsiales  
bacterium isolate NORP64 Contig\_source1382A\_23472, whole genome shotgun sequence  
MNIVKVEDISIANLPLFALVAGPCQIETLDHALFMAESIKKITDKLGIPFIYKSSFDKAN  
RTSAAAHARGAGIDDGLEILAKVKSQIGCAILTDVHTETQCAPVAEVVDVLQIPAFLCRQT  
DLLKAAAETGKVVVKKKGQFLAPWDMKNVYEKLVSFNAKGIILDRGTSFGYNTLVSDMR  
GLPVMAETGAPVFFDATHSVQQPGGIGASSGGQRQYVELLARCAISAGVAGLFIETHQDP  
DNAPSDGPCMLRLDSLEGTLSRLQRFDELKSM

>gene\_791|GeneMark.hmm|947\_aa|+|22189|25032 >NVVL01000045.1 Rickettsiales  
bacterium isolate NORP64 Contig\_source1382A\_23472, whole genome shotgun sequence  
MFLGFGIDAIIVVGFLIATLVVGLGHGRSITTIKGYALGGRNFSTGALVATLVATWIGGS  
GFTINLSKTYSSGFLYIVPSFGMTLSFLIMAYLFVPRMGEFLGVTSIAEAMGDLYGKHIR  
IITAVTGVMSEAGFVAVQFKVFGNLSYFLDLSPMTGIVAAAIIITTSYAFGGIRAVTFT  
DILQLFTFGFAIPIIGVMVWNHAYYDGVSLANSIQDNRFSEFILSKQNPDLGSMIALMC  
YFALPGLKPAIFQRISMGSVQVQKAFIISAVIVMFITFASQWIPFLLFNIDSTLEPSE  
LLSYMIENYTYIGFKGLVIAGIIAMTMSTADSNINSSAVLFANDICKPLNVGQNRCELLS  
KLFSIALGIGGIVLAVSTKDLLDVVLTANSFYMPVVTVPVMLTILGFRSSTKSVLIGMGA

GFGTVVIWRLLSIQADCFMSMLVNLIFLIGSHYVLKQKGGWVGIGQAALDALREEKME  
EQQKRAQKLADDKGFVDACQKHCPKDEMSFVGLGIYLIYTMTTIYSTTEALKHSNQMIL  
IYQIMMVSGVVLAMYPIWPRGVARKTRETIAQVLWPMIIAYMLVMFNLFVVMVSNFSPL  
QFAVFTLNLVIVVVLLGWRIGGIAIVFGSLFAMPLYKEYGAETNFDVAIGSPAFVLIYIL  
LLVGATIVLFLPKQEKLEQTEEKVGVLSGEVTSLDNKVVGLNEKVVHYSERTSDQAKEI  
ERLGATAQKILNNVNHLELRLPVGNVMMNFAEMMRDGLGKFSQKQKLMISEEVYENSRLST  
MILNMLDLATLNAKKIELKVKTNFSELVQERVESCRKIYVGDKPLEFKLNIEPNVMAVI  
DANYIRQTIDNLVINAISFSDKGVIIIDVVKQDGFASFITQDQGLGIPKNEIYDIFTPFK  
MGSNTESKAEGRGVGLALCKAAVSAHGGEVTAESNGKGAMFEVMLPL

>gene\_792|GeneMark.hmm|129\_aa|-|25021|25410 >NVVL01000045.1 Rickettsiales  
bacterium isolate NORP64 Contig\_source1382A\_23472, whole genome shotgun sequence  
MGFLHLHTLPIKPTLLENTDTSGVHTLLKNAHMLGNLSYLTVRGILKKNLNPSPNWS  
YSSGIISPPILSFSNEKTSKMATSLEIREMAIYQKNSRRQPSQQTVKEQYRSPILKPHPP  
LPRAGKLR

>gene\_793|GeneMark.hmm|581\_aa|-|25604|27349 >NVVL01000045.1 Rickettsiales  
bacterium isolate NORP64 Contig\_source1382A\_23472, whole genome shotgun sequence  
MSKIFKLFSTIVGYRLSLKELYFSLTTWLAGLVAFLGMATKFDSSLLANIVIAFCVLGM  
IVLITNRVLLSCLTLLAVLFDYVKLIKWQFFMQELLAADVFMKLLINHGLLRVIYEV  
STKEYLIFLLLINFMLMWNRSDDLKKEKELGNKHYYIFRLISFALAALISLKMFDLAI  
DKKSYVHSAIESMKSTQKDYQRRTYGPFAVDLFTLQDVYITPNHGEVDEALILDEVKKN  
FARSDKLEMPDIVVILNESVFDPTKLDYDFAEKFDFFKDKTKNTKYSGILNVNTFFGS  
SWISEYEINTGVPHKSFSGPSYMPFITLVPATNNSIMSHLRSIGYRVEVVYPVDKNFSLA  
FDAYTKLGAHEISDIYEFGFKPKSWGNIPTMIGDMIIDALDRNPGKPKYIYASTMLNHG  
PHSGFFPDITGCSRVMHDGLCSKLN DYVSRNRTSVDQSALIEKLMKRKKKTIIVNFGDH  
MPSFEGHSTHLRFKREIKDYKTFYNINANFKIASREKYPDLISFIPSLVLDMAKVNSN  
DFYKASSLVRKKCKGQMSSCASEKDMLESYKSLTVKQLDF

>gene\_794|GeneMark.hmm|161\_aa|-|27681|28166 >NVVL01000045.1 Rickettsiales  
bacterium isolate NORP64 Contig\_source1382A\_23472, whole genome shotgun sequence  
LFYPNLKIDIIKNNIDSLVMFKSIVIPVDLSDKQSIKAVFPALNFVNAFGAKIHLVHIM  
PDFGMKVIEDYLPRHWVRDQKEKYNKLFDDMVKKFVPEEVEVKIYIGRGAIYDEVINYSE  
KVNADLIILSAVRPQLKNYMLGPNASKIVRHSSISVLVVRD

>gene\_795|GeneMark.hmm|304\_aa|-|28141|29055 >NVVL01000045.1 Rickettsiales  
bacterium isolate NORP64 Contig\_source1382A\_23472, whole genome shotgun sequence  
MLRTIIILLISITIAPLHSAVAGQKIVRIGVGSVLEGYHSMGSQICRYISESNEGKCEL  
VPTSDSREALWLLHREKIDFAFTLSNLALQSYSGKGYFVTSKPFKDMRQLLRLHDEYFTV  
IVRDGADV KRFADLAGMRLSNGPPKSDSSVIYKALDSYDFKNPPIDIELAYEDYAKKFC  
GGAIDAIMIMTGHPSSLVNYIAHTCRSNFITIESDKIDLLLRNNPGFRKVVLESVYYPNI  
NESHESVAVSTIFVVGKSVDEKIVANFLERFKKEVSKFKATNPVLYDLKDSHFMSFVLP  
KFKN

>gene\_796|GeneMark.hmm|404\_aa|-|29065|30279 >NVVL01000045.1 Rickettsiales  
bacterium isolate NORP64 Contig\_source1382A\_23472, whole genome shotgun sequence  
MALWHKVFIGLILGLVFGVYLPHEVDIVKPIGDIFMRMITMVIVPLLFFSLVSGITGMRD

PNSVGRVAKKSVLAYFGTTCFAVIFGLGVAHIMKPGEGVVLDLGTAAPSNFKENGFILN  
FLIEIIPSNVFAFADSNILQVFFSIFTGMIINSMGTPLDPVRDFIHSAAKLVLMISI  
VVELSPYAAFALTAWVVGVTQGLDIMFSLGKLVGAIVVAYILQYLIFGLFIVVFCRLSPIP  
FYKKSIEYQMIAISTGSSKASLATTMQVCRHKLGVSESSTSFVLP LGAAINMDGLAIKLG  
LSAMFFAQILGVELALSDYMVIIILVGTVGSIGGAGIPGSFIIMLPIMLT SVGLPIEGVAL  
LVGVDRVLDLLSTTINITGDATITLVIDSTEGTLDRDMYNSDQV

>gene\_797|GeneMark.hmm|106\_aa|-|30327|30647 >NVVL01000045.1 Rickettsiales  
bacterium isolate NORP64 Contig\_source1382A\_23472, whole genome shotgun sequence  
LILGSAKYCVILTTTDCETAILIAKTLTENKLAACVQMDRVESFFVYEAKNERQKEFRL  
LIKARSDSYQAI EESILSKHNYQLPQIIMLDVAAGLPEYLNWIDGK

>gene\_798|GeneMark.hmm|138\_aa|-|30644|31060 >NVVL01000045.1 Rickettsiales  
bacterium isolate NORP64 Contig\_source1382A\_23472, whole genome shotgun sequence  
VIECTRIEFDAGHRVIGHKHKCKYLHGHRYVLEVTARSEELDELGMVVDFGVLDVVKG  
WIDENFDHNVILHKEDKELGAFITNHTGQKIYYLNANPTAENIALHLKSDIIPMLFVENS  
FSIVKIRLFETPNSFVEV

>gene\_799|GeneMark.hmm|132\_aa|-|31070|31468 >NVVL01000045.1 Rickettsiales  
bacterium isolate NORP64 Contig\_source1382A\_23472, whole genome shotgun sequence  
MSNTILVKIILPAQMILETEADMVNIPGSDGMFGVLP GHAKLTSGIDIGVITLVSDFEQ  
RYFVYGGVAQVTGEELNIITEFAVDLTKNKVNVLDNITNLKSDLSDEEVGSVEANIIAG  
QIERYETLLKFI

>gene\_800|GeneMark.hmm|478\_aa|-|31472|32908 >NVVL01000045.1 Rickettsiales  
bacterium isolate NORP64 Contig\_source1382A\_23472, whole genome shotgun sequence  
MTKNEGRITQIISAVVDVKFDGGVQLPNISHALECLNNKQRLVLEVAQHIGDSTVRCIAM  
DSTDGLTRGIVVTDGKPIQVPVVGKGT LGRIMNVIGESIDELGPIKTKEFSSIYRDAPAF  
DEQSTERSILVTGIKVVDLLAPYAKGGKIGLFGGAGVGKTVIIMELINNVAKAHGGYTAF  
AGVGERTREGNDLYHEMIDSGVINPKNLEESKVALIYGQMNEPPGARAKVALTGLTVAEH  
FRDLDDGGQDVLFFVDNIFRFTQAGSEISATLGRIPSAVGYQPTLATDMGILQERITSTKT  
GSITSVQAIYVPADDLTD PAPATSFTHL DATTVLSRQIAELGIYPAVDPLDSSSQMLDPD  
VVGERHYKIAREVQKVLQTYKSLQDIIAILGLDELSEEDKLIVSRARKIQKFLSQPFHVA  
EVFTGLPGKFVDLEDTISGFEGLEVKYDHLPEAAFYMGVTIEEAVEKA AKLAEKESI

>gene\_801|GeneMark.hmm|290\_aa|-|33041|33913 >NVVL01000045.1 Rickettsiales  
bacterium isolate NORP64 Contig\_source1382A\_23472, whole genome shotgun sequence  
MSNLKQLRNRVRSIKSTQKITKAMHVVSASKLKLKEKA EGLNHYSVLGDIMHDISTSG  
NLMDLPICDRKFFSEDLKKMSHLLVIMT SERGLCGGFNSSVIRSAKRDIARFQKEGKQVK  
LLVIGKKGCDAFSRKYADMIEGTYHNNKASSACVSLEVKNKIMEMVENE EIGACYMYYNL  
FKNAMTQILTTEQVLP AHTADEAESGGVSEY EYEGENVVHNVIDLYIGGQIN YGLLSRA  
SEEC SRMTAMD NATRNAGDLIDSLTLKLNRSRQA IITTELTEIISGAEAV

>gene\_802|GeneMark.hmm|513\_aa|-|33920|35461 >NVVL01000045.1 Rickettsiales  
bacterium isolate NORP64 Contig\_source1382A\_23472, whole genome shotgun sequence  
MALNPSEISEILEREIGDIDQLGELKEVGYVITVGDGIAKVY GIDNVKAGEMVEFSSGVK  
GMVLNLETD MVGVVIMGNDSSVRQGD KVERTGEILQTPVGPAMLGRVVDALGRPIDGKGE

IVTKHRSQVEVKAPGIISRKSVHEPVQTGIKAI DALIPIGRGQRELIIGDRQTGKTAIAI  
DTIINQKSAHLAGEDADKIFCVYVAIGQKRSTVAQIVKKLEEAGAMEYTVVVSATASDPA  
PLQFLAPYTGCSIAEYFRDKGQHALLIYDDLSKHAVAYRQISLLRRPPGREAYPGDVFY  
LHSRLLERAAKLSDKEGGSLTALPIIETQAGDVSAYIPTNVISITDGQIFLESELFYKG  
IRPAVNVGISVSRVGSAAQIKAMKQVAGSMKLELAQFREMEAFSQFGSDLDASTQRLISH  
GRKLELLKQAQYSPFLVEDQVVSLEYAGVNGYLDKIDTSQIRDFEKKLLADIKLKGEDIL  
ASIRKEKKVNEETEELKAYLEKFVKVFLGNNS

>gene\_803|GeneMark.hmm|183\_aa|-|35515|36066 >NVVL01000045.1 Rickettsiales  
bacterium isolate NORP64 Contig\_source1382A\_23472, whole genome shotgun sequence  
MLLDLKVVKNYAQLFLKAKDLSKEDKILEQISIISDITEASPLAKEVLCSPIIDHSLKI  
KLIDLLAKKYKFDKISQRFLYVLVKNTRCNFISKIVDEFKMLAESKGIKAVNVSSAFKL  
GKKELSFYKGFLETELNKKIELTTKEDASLIGGVVIEYDSNLIDCSVHGALEKIQQVALK  
SKV

>gene\_804|GeneMark.hmm|420\_aa|-|36172|37434 >NVVL01000045.1 Rickettsiales  
bacterium isolate NORP64 Contig\_source1382A\_23472, whole genome shotgun sequence  
VKLKERSYIIAFCATIVRYDYALFGLSASLISKHFMPGKDNSEQMLVFFAIFSVAVLA  
RPVGSIIIFGKIADRVSRIVSVKIATVMAIISTSLIAVIPSFELISWFSVAALIFCRMVFM  
MSLAGEVDIAKVYVAEKIGNEKRHFGAGIVSFSSQIGVLLASVMYHIAISYEEIKWLWKM  
NFVIGGILGLAVFMMRGYFSESKVFLKEATTGSRLDADEGIISIIWNNKLFVLSSIVNG  
MIGGSYHFLVVFLGAFANVINIIPPEQAASNSKLIALLYGVACILSGYIADKVKVIAQV  
SIALTASIICVLVMEFMVEMNVFVIELHYTLAFIVPFYTPCAIKVQSLFPIGIRMRMFS  
LSHSIGSMIFSSTTPFICMLLWKSTELPSIVLSYFLAQLGILFFVMIYIANKNYVSMFKT

>gene\_805|GeneMark.hmm|210\_aa|+|37529|38161 >NVVL01000045.1 Rickettsiales  
bacterium isolate NORP64 Contig\_source1382A\_23472, whole genome shotgun sequence  
MIGKLGKIDSIDDGYFIIDVGGVGYMVYCSGKTMSKLVPEYAEILVETHVREDHIHLY  
GFYDMDEKSMFNILQSVKGVGTRMALGILSHLAPVEIQLALSAQDKTMFLSVSGVGKCLA  
DRIITELKDKFPSTGVISPAAMAASAARGGASQAHSVGMANDASALANLGIKIDAQN  
RVQTIIASNPDISINELIRLALKTGASSTI

>gene\_806|GeneMark.hmm|343\_aa|+|38158|39189 >NVVL01000045.1 Rickettsiales  
bacterium isolate NORP64 Contig\_source1382A\_23472, whole genome shotgun sequence  
MTAEILSGNELENDADSSIRPGYLQEFVQGEHIKSNLIGIFIQAANKNREEALDHTLFYGP  
GLGKTSLAHIVAREMEVNFKATSGPTLSKAADLAAILTNLQENDVLFIDEIHRHLIAIEE  
ILYSAMEDFSLDIIIGEGPAARSVRIDLPKFTLIGATTRMGLLSNPLRDRFGIPLRLNFY  
TTDELVSVINRAAKLFKTNITDKGAQEIAKRSRGTPRIALRLLKRVRFATVDNKSEIDE  
QIADSALNRLEVDKAGLDSNDYRYLKFYDNYNGGPVGVETIAAALSEQRDTIEESIEPY  
LIQIGLLQRTSRGRMITNNAYQHGLNSPQASGTGTQETLFDE

>gene\_807|GeneMark.hmm|412\_aa|+|39640|40878 >NVVL01000045.1 Rickettsiales  
bacterium isolate NORP64 Contig\_source1382A\_23472, whole genome shotgun sequence  
MKGNSSNFIAFDIGSSKIAAIASNITKQGRIKVNSQLHHAEGFKSGMITHMELAENTIV  
TAIYALEKECKDSIKEVAISLSGTGVKSYIINHKKLGNQTISKQDIKLINKALSDFKV  
KDQEIHYFPMFVIDEGQIVDNPVGMYSVRSCHLHIIADSLMLMNLKCLDKCHVRI  
NDVTVAIYASALACLSADEKELGSIIVDIGSHTTSFGVFLNGQIVYVGHVPIGSMHITTD

IAKQFSISLHEADKLIKILYGNANPDLISKDTTIRLDDISSSENYHADLSITTIELSKMIH  
SRIEEIFLNKIQYNHISMDNLISRRMIVITGGASSMPGIKNLAAEIFQKQIRIAKPENLP  
GFAEDNNPYAYSTVVGMLKAESSKYQKDSIRSQQDDSGGIFKRMFSLKENV

>gene\_808|GeneMark.hmm|330\_aa|+|40857|41849 >NVVL01000045.1 Rickettsiales  
bacterium isolate NORP64 Contig\_source1382A\_23472, whole genome shotgun sequence  
VAQRKRLVVLISLVALILYVALIYPINAHASVWIPKTNEYKYYSFSIIDKRSENKKIKW  
ADLFVKDQEMIHKLTKRQNAIKAKADDENRSLFNHEIAELNDNAAFLKEFKEYKMILGSL  
GEDKTSNFELEYGINDHQSLGMKIGYKTDNFLRSITPHYTEQKTGKDFELFYKYQLLKQE  
GWIVAISPSLQYSTYTGCKPYRHFDLALMAGKSRLHKNNYTLFYEFGASVHAHSKENSLS  
KTGFTLFMTDGIRFANNVIITNYMKYEQNRFKNYAHNKILYEQISIAKEIYFGNLSKQSF  
TIQVGYFAKGSVLVARGYNVSGFIFSLWFSL

>gene\_809|GeneMark.hmm|585\_aa|+|41834|43591 >NVVL01000045.1 Rickettsiales  
bacterium isolate NORP64 Contig\_source1382A\_23472, whole genome shotgun sequence  
MVQPIINAACKFSSIANRSKPGDDCIINSLTANDWPGGDHVDNESIIESLIKNRQMP  
FIDHTKIDINILHFSKINEYCRQGYLEFQDANGNRHYAINNLSVIKQKGLHLSEGHKFHL  
IRKRDLTQILEKHFSHKQSIWASNHLNSLNKDACAAGVNYIKMVTGFSVIFFAIFFLFSN  
LFNIVNNLLYLSQNILKAALFKNGFRKTDKSLAKRTGPLPIYSVLIPLYKEDIKAKFILK  
SIELLDYPKDKLDVKLIEADDILTIRALAVLDIPSIVQLIKVPYSLPRTKPKALNYAMG  
FARGEFTIYDAEDRPDSDQLLKALYAFETLTDDYACVQAKLNFYNAKENILTRFFSLEY  
RIWFEYFLKGLSFLNIPIPLGGTSNHFKIDKLKEVGYWDAYNVTEDADLGIRLYLRGYKV  
HIIDSVTTEEAPVNIYDWIAQRSRWIKGYLQTCVFMKAKKDRKVFSLQDSLSVYVFGVL  
STYSFLCLPWLFTSLLLDVDPYIHYLLILNGVLSLSYLYATAFLALMRERSNKAPSLGA  
ASLLWPLYFILHTIASYRAIYEIVSPFKWNKTPHGVSIDEIEE

>gene\_810|GeneMark.hmm|82\_aa|+|43621|43869 >NVVL01000045.1 Rickettsiales  
bacterium isolate NORP64 Contig\_source1382A\_23472, whole genome shotgun sequence  
MRKWQLHNAKDKLDDLIEEALSGSPQCITKHGEEAVIVISMVEYEKLNKNEESDLREFLVN  
KGPKFNNLEIERPHGVVRSYEV

>gene\_811|GeneMark.hmm|59\_aa|+|44054|44233 >NVVL01000045.1 Rickettsiales  
bacterium isolate NORP64 Contig\_source1382A\_23472, whole genome shotgun sequence  
MKKLLALLQTVILLFLIPGVPIARWCKVEEDKMLFRMTINIIYYLTIAVFALIENISDL

>gene\_812|GeneMark.hmm|719\_aa|+|44394|46553 >NVVL01000045.1 Rickettsiales  
bacterium isolate NORP64 Contig\_source1382A\_23472, whole genome shotgun sequence  
MHHDSNITDLNPPQIEAVNHTEGALLVLAGAGTGKTKVLTCRANIIEKNLAYPSGILAV  
TFTNKAAREMQERVSSMINADGLNIGTFHSIASRIVRSHVELLDINLNKTFTIIDQDDQV  
KLVKNIAIQKNVDVKQYAPKMIHAIISRWKQDQALLPAKLSSADTPSPAHSIAKMIYREYQ  
IQMQASNVMDFGDLLLYCNQLLIQNPDILEHYQNKFKYVVLVDEYQDTNAVQYIWLRLMLAN  
KHKNICCVGDDQSIYSWRGAEVKNILRFEHDFPNAKVIKLEQNYRSTSYLNAASSIIQ  
NNKSRHGKKLWTEQKSGEKINIISCWWDKEEARFISTKVEEIIHSSKYNPSQIAILVRAG  
FQTRAFEETFISNALPYQIIGGLRFYERMEIRDLLSYIRLCINHNDNLALERIINTPKRS  
IGNVTLKKIKDYASEGEISVFDALQRMLAENIFKGAASLEQFVTIILSAAAKYESGTA  
IEATKFILEESKYIPLLKEEKTDESRGRIENINEMLRAIDFEDNIYEFVEHSSLVMDNAS  
LEEGFGGTVKIMTLHAAKGLEFDLVFLPGWEENIFPHQKALSEEGGKGLEEERRIAYVGI



TRAKKELYITHAESRRVFAEFVNSLPSRFLKEIPEEYCNDRSSTNRLNYVASKHNFSMQT  
NPKPKHIPIDNSDKKAGSRVLHQKFGSGIVVRKDGDTLEIAFEKIGLKTIKESFVEAAK

>gene\_813|GeneMark.hmm|441\_aa|+|46728|48053 >NVVL01000045.1 Rickettsiales  
bacterium isolate NORP64 Contig\_source1382A\_23472, whole genome shotgun sequence  
MGKNRLAAEATVTRPTKEQLSHLSFAQEVKQGVSAVGDLIERAKKSAGVSSEQSPDTLLE  
LSTGIFKRAMILGGSAGVQIYSTNDEGERIDKPAENGLPITYALSHGSRTLIKIPARSG  
DQVINWLTSGNPAISGMSNTQTTQK GALADGKAVYNRPAATHAIGFTNDEPRELKSMLIG  
VRDFLSSKILGRRTTKHYGVDLGLCMESGAAPDGKNGHLYIHYPTEARPGAILFGCESH  
APSSSQHSKVGNSNPVSPTGCSKFKVLKHKKIAGETEYNTIIPDKYHGMIGALDDQGV  
KALITIEADKFGKSLALTMPQNSPFDIAQYVNSPETEKNLRTLPELPTSAQKTPAPLAK  
PNLFIRIANKVSFGLLFHDTMKEYKSEKKRYKIQSAIGAENTNSPPKSLRKRPHPLTP  
PPPLTPSRTPPTPTQEASRIR

>gene\_814|GeneMark.hmm|140\_aa|+|48299|48721 >NVVL01000045.1 Rickettsiales  
bacterium isolate NORP64 Contig\_source1382A\_23472, whole genome shotgun sequence  
MIIKYP CNITKDQDRFLVTFPDFPEALTEGLNLEEALFNAIEALTLTLEARLDEKIDIPT  
PSLKKHQYWITPSVQVQSALLIRFARAETISDLARILETSWPAASKLENPHHWPTLRQL  
DKTAAALGKKLVISMEEIVR

>gene\_815|GeneMark.hmm|333\_aa|-|48787|49788 >NVVL01000045.1 Rickettsiales  
bacterium isolate NORP64 Contig\_source1382A\_23472, whole genome shotgun sequence  
MHAFCVRIFSEDNQFMSKIMSKIYQDAILKMMHSCATRQDIYNVVLKSAQGGFLHNIMD  
SYKKMNGNDAIFSTSRLFRKIFLENNLEVLKAAAEKDILSEVLAAHHLNDEVIHAVFYNSK  
MFAQVFISVSDEQLSRVLNGYDAWGLGLLLSEATKANVLKEVIEKIGGKFTPDVASSLLS  
ATCLAEVSSVLEAFASCSINFSDAWNKLKLDQAQKNVLTDLVESGALPTMIELSSELSIDW  
NTFFGKMNSNEIEEFLKVVENGLYSQLIGAMGDNYVMIVANLSASFWDSPKATHHLQ  
VVIGACEAIAECCDFPVDVQNELAGFCENLPE

>gene\_816|GeneMark.hmm|420\_aa|+|50112|51374 >NVVL01000045.1 Rickettsiales  
bacterium isolate NORP64 Contig\_source1382A\_23472, whole genome shotgun sequence  
MESEKKNKVVSMVLWLCITLFYCYQLVLRMLPNAIMTDIMTKYSIGASEFGSFAGIYYIG  
YIIVHIPVGMLLSRFGGKIVLP IACTALGLIPLVYFDSWTSVIIGRVLTGVGSSAAIV  
GALQIFRILYPAKFSRMLGFMVFFGLITAVYAGVPISQIIQSIGMDYTVSILLYSGIVLA  
FVTYVLM PKSTNTASESSMLGDIAIIFNYRLFSTSIFAGLMVGPVEGFADAWGSAFLIN  
VYGIKTIANSITLSVLLGMCAGCIILPYIAEKTLYFGVTIFSGLVMI LGFVYILNGKA  
SADSLYYACIIIGVFCAYQVVI IAKIASFVSSDRSGMAAAIANMIIMFFGWVVFHNSIGMR  
LDSLWDGEMLGDMKIYSADAFISSISIIPAAISIAIVGLVIIAMSNIVRVRLAQKVNSLK

>gene\_817|GeneMark.hmm|455\_aa|+|51383|52750 >NVVL01000045.1 Rickettsiales  
bacterium isolate NORP64 Contig\_source1382A\_23472, whole genome shotgun sequence  
MMRLIACFIICILPLTIQARDGVGDAIEQIITKTDP SLNIGIKITNL DKNKVVFAKNAAR  
YFIPASTLKF IASVAFLEHFGKDYQFTSRVLKKGSSYYLDIHDPDFKTEDLAHLVKELAE  
YSGKKIKGNIYILNREFSVPPAMGDKTCSDITYCMGAPVTLVHINKNCSRLPVSAKRVGK  
KISVKPDEDFPYHIKNNTKTIPKGERDRLRVDVKNQYIISGTLCMGRGKVEIGGVVSDN  
NLSNVKYHLKKQLAKAGIQLK GKILYKKTLPKGRVSSVSKSLQDIVAIALKQSDNFIMD  
YLLAELATQNNQHEWRLAVSS LKLVHEKLG VNLQNSVIKDVSGLSRSNLIINQFDSLL

KQIAKQPNFAEIKGFMAIPGEDGTLQERFNGMKKLYAKTGT LGNVSNIIGYFYDKNNELH  
SFAIFSNNFYGRRAKYRMLQEDIIRLVAGDNSFLE

>gene\_818|GeneMark.hmm|184\_aa|+|52773|53327 >NVVL01000045.1 Rickettsiales  
bacterium isolate NORP64 Contig\_source1382A\_23472, whole genome shotgun sequence  
MNISFKPLCESDFPLMLKWLEAPHVKQWWDLDIVWTLELVQRKYSSYANGYKNLKLNDQI  
IKKPIYAFIIFAGDVPIGYMQYYNSHDFPPEQSYNCSEFLEHCAGLDWYIGEVEFIGKGI  
ASQIFLLFLEQFVFCFKFDHVLVDPDSQNTKAIHIYEKIGFTVIKKTINKNLLMIKTKNNC  
SRIS

>gene\_819|GeneMark.hmm|98\_aa|-|53459|53755 >NVVL01000045.1 Rickettsiales  
bacterium isolate NORP64 Contig\_source1382A\_23472, whole genome shotgun sequence  
MLKQIDKIGNNGEKVMKTIADGRREEGWKDGLAEGREEGISIGEERGEKIGVEVERKKT  
ARMLKENFAPKIISSITGMSQRAISKLRSQLKLQGELA

>gene\_820|GeneMark.hmm|266\_aa|+|65|865 >NVVL01000046.1 Rickettsiales  
bacterium isolate NORP64 Contig\_source1382A\_23537, whole genome shotgun sequence  
MLKARTFLRTKAEKATLEAETATKAKTNFLAFTAHEIRSPLGFIITGSEMMAKGF TGKLS  
KQHQEYAEGIHENAQQILEFLSDILDESQIIEGKFKIRNTQTQLEDVINEAIKVN LARYH  
KKKINVVSKMEENLPLLICDRRRILQVLSNLISNSLKYSDHHTTITLTGKVVNNKMEVQI  
IDEGIGMDEKGINIALSSYGTLEHGRHYSYGLGLPIVKMLLNAHDATLSIKSEKSKG  
TVVKIVFPKYKLVYNAPNLDKTKGQS

>gene\_821|GeneMark.hmm|367\_aa|+|869|1972 >NVVL01000046.1 Rickettsiales  
bacterium isolate NORP64 Contig\_source1382A\_23537, whole genome shotgun sequence  
MDYNRERFLKLRNIPLIILLIILLCVYGFVLLYSAAGGSFHPWAYKQITVFCIFMPIS  
ILIAMMDLRLIYRFSYLFYIVTLLLLIIVELTGKSAKGATRWLDFGLFTVQPSELVKISV  
VLMLAKYFHESDKYNTSEYAIIPIIAAAIPVLVIKEPDLGTGIITIIVAAAIFFAAGV  
RMLYFIVGGFLTLSAMPPIIWFMMHNYQRTRVLTFLDPARDPLGAGYNIQSKIAIGSGGL  
FGKGLLSGTQSHLNFLPEHQTD FIFSF LAEELGFVGGMVLLILYSLLISSLAVSINCRS  
KFAKLIAVGITLFFAHVFINIAMVMGLLPAVGVPLPLISYGRTMLASILIGFGFVMNAA  
VNQRSNV

>gene\_822|GeneMark.hmm|166\_aa|+|1980|2480 >NVVL01000046.1 Rickettsiales  
bacterium isolate NORP64 Contig\_source1382A\_23537, whole genome shotgun sequence  
MLKSIYNFLLRALSALYLALLCLLPFQWHKIGSYSEIFPAFDLIIVFYLN TYKNLQHWHL  
FIIGLIVDRFYFLPVGSSSLLFILANMGLKVIARWLLLQNYLTNFAIFCVYSIFIMLSRE  
LIVTIKSTYYIEGFALYFYILTTFAYPIICMLINKPIKILTTHAE

>gene\_823|GeneMark.hmm|599\_aa|+|2470|4269 >NVVL01000046.1 Rickettsiales  
bacterium isolate NORP64 Contig\_source1382A\_23537, whole genome shotgun sequence  
MLNKDTINKQIMTRRTFVIGAGKLG LLLLAGRMFSMQFIKKDEYKTLSDKNRIKVIIP  
PDRGQIFDVNENIIAKNNTCFHLFLDKNVNPRFSKEISLVTEILELDDVHIKEVQKRVRN  
AGRRIAAVVIDCLNWKQVAIIEERRSEFKSLFVDTGFNRFYRSGTATAHIVGHLGKVRKN  
TKNQSLKLVGENFRVGVNGIESYEE SLRGKFGNKRIEVNARGKYVRELGNMAPTPGKDL  
HLNIDIALQKKALSYLSSQGCSAIVMDCTNGDVLISASAPSYNPNEFYKLSNKYWN SLIN

NPYKPLIDKTIRSLYPPGSIFKIITVLAALLESVDPADKIICTGGPVIKGSKYFRCARSR  
GHGALNMIDAVKHSCNTYIYAIARQIGADKIMETAKKLGLGAPTGVLDLPGELSGFIPSKS  
WKKERYGTKWRTGDTLNLISGQGDLLSTPMQLVRLIAAIASNGKLFTRIVKGEPEYPT  
QIDISPEHLGILKTALYHTMNSKGGTGYANRINYKSMRMAGKTGTAQVQSKKHTHDNLSR  
EDIAWKS RNHAIFSGYAPFDNPKY AISIYYDHGGGSKSATPIAKKIMLDVLSKYANKL

>gene\_824|GeneMark.hmm|280\_aa|-|4329|5171 >NVVL01000046.1 Rickettsiales  
bacterium isolate NORP64 Contig\_source1382A\_23537, whole genome shotgun sequence  
MQIRQILKVAIKELSNQRAPSLDARLLLCATMEYTHEELLNYNQELTPAEEKEFMALVS  
RRKSSEPLAYILGQQEFYGLERIDRNVLI PRPETELLIDLVLNDPLPHNKTIKILDGTT  
GSGAISIALAKHIQAASITATDISKQALEIAKINAEIHDVSGQINFRISDWYDQLGEAKY  
DYIISNPPYIAKSEQDQMAKETLLFEPELALYAPEEGLAAYKSIINAASQHLKPGGRLLL  
EIGYSQKNAIISILSANGFKNTRTHQDLAGLDRVIMAKMR

>gene\_825|GeneMark.hmm|249\_aa|-|5174|5923 >NVVL01000046.1 Rickettsiales  
bacterium isolate NORP64 Contig\_source1382A\_23537, whole genome shotgun sequence  
MGSACSRYKITLEYLGANYCGWQRQKESLSLQQVEDAIFAFSKEHVTLHVSGRTDAGVN  
AYGQVAHFDEKSHDLARLMHSINHFRCRPHITIAIVDIELVDSEFHARFSAKTRHYVYKIL  
NRNAVNVIDSGKKCWIRHDL DVEEMQKAAKYLLGHDFSSFRASACQSKSPFKTLDKIQI  
IKNGDDIEIYFALSFLHMMVRNIVGSLLMVGKGHWRRAEKIKDVLEAKDRKAAGFTAPSE  
GLYFLKVDY

>gene\_826|GeneMark.hmm|684\_aa|-|5924|7978 >NVVL01000046.1 Rickettsiales  
bacterium isolate NORP64 Contig\_source1382A\_23537, whole genome shotgun sequence  
MNITTRQAVQAASNAKKLDNLVSKAKKKGFVYDEINKSISANKDLSVTDLEGAISKFS  
AGIDIIEDDDNEDIKLDINVNQELTVSSRSSASSDEETPSDNISVDNGSTDDPVRLYLRD  
MGGVELLSRENEIVIAKRIDEGKELMLNSLCSPLAMKRFIKWFEDLVNENILLRDLIDL  
DANLVTDTGMIEENDLIEKEEQEELAEQQVVERQVAEEDLEPKDGLKAGAGKKSNDPSDA  
DSDADSM EKEDTPSLSVTAMEAELLPSITDKMEEIAGICEELLQKSREYFASSASTEKKS  
SLKNDKAYTKTIATLVEAVTSVHFSSKRVEEILTDVYTANKALVSKEMELLKLAEKHKVK  
RPSFLKEYVGAHLNEEWLEKLHKKKEAAWRNFLREEKEAIDKFLANIREAEEAAGLNVPE  
FKRVVNAIQGERQASRAKKEMIEANRLRVISIAKKYSNRGLQFLDLIQEGNIGLMKA  
VDKFEYSRGGFKFSTYATWWIRQAITRSIADQARTIRIPVHMIETINKIIRTSRQMMTELGYE  
PTPAEIAARLAMPIDRVRKVMKIAKEPVLENPVGDEDEDGSLGDFIEDKNAVLPNEAAFQ  
TNLRETTTRILSTLTPREERVL RMRFGIGVHTDHTLEEVGQQFNVTREIRIRQIEAKALRK  
LKHPTRSKKMISFLGENTTKNTTW

>gene\_827|GeneMark.hmm|620\_aa|-|8016|9878 >NVVL01000046.1 Rickettsiales  
bacterium isolate NORP64 Contig\_source1382A\_23537, whole genome shotgun sequence  
MQISLEFYNHLRELVPVSEIVRKRLLLTRKGKEYLGICPFHNEKTPSFTVNDIKRFYHCF  
GCSAHGDVIRFVSEINGISYKDAAIKIAGENGIELPKVSKAQEKRYEESQIYNILELAS  
QFFASNLNNDITKYLDKRGVSAESIKDFSIGYAPGGKQLEEFFARKSIDLKDLLKAGLVG  
KKDDGRIYQIFNKRIMFPIRNIYKVVGFGRVIGDSL PKYINSPETLVFKKSDTLYGEN  
IATGHSYKDNYSIIVEGYMDVIALHQAGFKQAVASLGTSVTENHLQKLWRS GDEIISCLD  
GDTAGMRAAARLNNALVHIAHNKSVSFIELPKGSDPDDLKASGSKGFS DLLQRRTQLS  
EMIWKNEYAGKSFNSAESRSALQKLEDYSAKIEDRTLKANFRRYFKDMIWNNLVRKKKS  
NYNNNHGNNGNYSNNNSYGNNGYNNNNNKTISKELLASKEYSEMEFLEYSICAYMLKF

PEIIKKVHEDETLPNLMLLENRELDEFKNWIFDIITREEGSADQLIRENVENTGFYDITYLV  
LSASDTLFLDSLNSLNKSNIDQEKVFEWLYKKHYLLLLKKEYMNTLNSKASEEQSKSSSYM  
EEIQAIKHLAQLSDDFINN

>gene\_828|GeneMark.hmm|204\_aa|-|9882|10496 >NVVL01000046.1 Rickettsiales  
bacterium isolate NORP64 Contig\_source1382A\_23537, whole genome shotgun sequence  
MNNTAFNFEIRRAKAFHICAIAMPILYLLTSKIIMGIIITIIAGTTLYIDISRHYDKKIKG  
VIDKFLGQFLRFSEKTSFALSGASYMAFGFLITCLFFSQGLAITSWLILIIISDSFAALI  
GMKFGSPVINGKSYIGSAAFFLSAIFISILSYFTIGYTTFSFMIIIISSFFATLVELFSKQ  
IGIDDNFSIPVTYALSTFILGLML

>gene\_829|GeneMark.hmm|162\_aa|+|10578|11066 >NVVL01000046.1 Rickettsiales  
bacterium isolate NORP64 Contig\_source1382A\_23537, whole genome shotgun sequence  
MEKFPITQKGYKLEAEIKQLKYEERPSIIIEAIATAREFGDLENAEYHAAREKQSFVEG  
RILDGKGFSAEIIDTSKLSSTDSVKFGATVKLIDDKTEEECTYHVVGEEYADITKKMIS  
VRSPLARAIIAKSVGDVVEVSTPKGKTYEILEITFQELDL

>gene\_830|GeneMark.hmm|298\_aa|+|11150|12046 >NVVL01000046.1 Rickettsiales  
bacterium isolate NORP64 Contig\_source1382A\_23537, whole genome shotgun sequence  
MTTTTNPVVTSASGFSGYLQEINKIPSLSKEEFMLAKAYLEKHDLEAAHKLVTSHLKL  
VAKIAIKYKNYGLPVELVSEGNLGLMQAVKKYNPDLGHRSTYAMWWIKASIQEYVLKS  
WSLVKIGTTAAQKLFSLGKVKHKITNMYARSVNEGDPYELANLGVTVKDVTEMSQRL  
SGADLSLNRPVNRGDDSSSEMIPELLPEARPSHEDTLSQSQSLTNQKDVLSRAMCVLNDRE  
VKILTARKLLDSPSTLDTLSNEYNISKERVRIENRAFQKQNYVVLGHMTEDGQVINC

>gene\_831|GeneMark.hmm|271\_aa|+|12106|12921 >NVVL01000046.1 Rickettsiales  
bacterium isolate NORP64 Contig\_source1382A\_23537, whole genome shotgun sequence  
MTDRIPFVKMHGLGNDVIILEDALPSNWEDSAFIPSISSRIIGIGCDQFITYKQTD SAR  
FAMSIYNQDGGVALACGNASRCLSRILFDETLGRNITLTVAGGRVVLCEYISKDAIKVNM  
GVASFSESWMPESDLWNLVEHYPIEPKEMICVDVANPHLVIFSQSDQDKKLIGKNFQK  
TDLFKGGVNVSFARVEDDKIHLKVVWERTGFTYACGSGAIATFAAAVKLGFADAEIIF  
KLGSLKMKITIDGMITICGSASYVFQGNFYFYE

>gene\_832|GeneMark.hmm|422\_aa|+|12890|14158 >NVVL01000046.1 Rickettsiales  
bacterium isolate NORP64 Contig\_source1382A\_23537, whole genome shotgun sequence  
MFFKGIISMNNSQEVVTFGCRLNIYESEIIKDNLAKSGTENVVVFNTCAVTKQAEKQARQ  
AIRKLRKQDPDKKIIVTGCAAQNNPAMFASMPEVDKVIKNEEKLSDKYYDLNTERVIVND  
IMSVKETANHVMKSFDFGRARAFIQVQNGCDHRCTFCMIPFGRGNSRSVPIGVITQQVRL  
VDDGYKEIVLTGVDVTAYGADLPGTPTFAQMIKRLSLVPLARLRLSSIDVAEIDDDLF  
DLMAHNTRLMPHFHISLQSGDNMILKRMKRRHNRDQVIEFCHKLRKIRPEVSFGADIAG  
FPTETDEM FENTRRLISEAAIQYLHVFPYSEREGTPAARMPQVPMEIRKKRAAILRAEGE  
VELKFFFNQINIGRNVALLVEKNIAHSESFIPVKLEGNFDSGQLVSGKLVFEFDNEYMRAI  
VA

>gene\_833|GeneMark.hmm|316\_aa|+|14164|15114 >NVVL01000046.1 Rickettsiales  
bacterium isolate NORP64 Contig\_source1382A\_23537, whole genome shotgun sequence  
MDKLDKISIIAGSWGTAALGCLAARSAREVMIIYNDPAITYEINSSCRNTKYFNDELHE

NLIATSQIKDTLKADIIILAIPSYAFSEILELLKSHGLKPSTILLIATKGLSENVPVQFLS  
DKIESEFENPYAFISGPNMALEVVRNKFTAMTISSKDLSLAAKLADVFKSDMLDVTISDD  
IITIQUIASIVKNIIAIRSGIMKSAGDGENAKAWLISTALAEISIISKALGGKPEANIALP  
AVIGDLVLTCSYDISRNRFRGYEFHTHNYSKEFLTTYPLLVEGISSARLLGSLIKTYDLE  
LPLISSIIDLLHVNY

>gene\_834|GeneMark.hmm|305\_aa|-|15203|16120 >NVVL01000046.1 Rickettsiales  
bacterium isolate NORP64 Contig\_source1382A\_23537, whole genome shotgun sequence  
MDSQFLSWGIFAVIIIIILALDLGVLNKNHDHVELRESLALTAIFYIFVACLFGVYVFFKL  
GAASAGDYFTGYLLEKAMSLDNIFVISMIFSFCKIPLKYQHRVLFWGILGVIMLRAIMIG  
LGASLLARFEWILFVFAVFLIITGVKFTTASAENAIDVKNMYIYKLLASKLNVHPELAGN  
KFIKKQKGLFVTPLFMALITVEIMDVIFAIDSIPAIFAVTQDSYIVYTSNIFAILGLRA  
LFFLLSDIINRFKYMKYSLAVILILIGVKIFVAHFIEIPNYIPLLVTITLLALGMIASNS  
KKLDT

>gene\_835|GeneMark.hmm|183\_aa|-|16216|16767 >NVVL01000046.1 Rickettsiales  
bacterium isolate NORP64 Contig\_source1382A\_23537, whole genome shotgun sequence  
LENMSNQKHIDVTTLHKWLDSEKAILVDVREIVEFSDEKIPGSINVPLGTVSAKNTLLSK  
YKDKKIVISCRSGARSLSACTKILQDVPSAGLYHLDGGILAWKERGFKTIRKTEILPLER  
QTQIALGGMIVLGNLLGYFVSFEWNLLSIFVGLGLINSATGWCGLMKLIACLPWNRQSD  
QQK

>gene\_836|GeneMark.hmm|394\_aa|-|16978|18162 >NVVL01000046.1 Rickettsiales  
bacterium isolate NORP64 Contig\_source1382A\_23537, whole genome shotgun sequence  
MYKYKRYLELLIQGQSIFLWGARKTGKSTYLKNLYSSSLYIDLLKTDLLVRYMKQPSLL  
REEILALPDDKLELPIIIDDEVQKVPALLDEVHWLIENTNATFVLCGSSARKLKQQTGNTLL  
GGRAIKYHFYPLVPEYKDFDLKIFNHGLIPSHFMSPNPRKLLQAYVEDYLTNEIRSE  
GYVRNIPAFSRFLDSTIFSDGEMLNYNNIARDVGDIAKTVKEYYQILVDTLVGYLIYPYK  
KKMNRDIISHTPKFYFDVGVATRIGKKHFENLAGAEAGRALEHFILMELMAFLNLTDS  
HKLYYWRTRTKLEVDFILSDNVSKPIPIEIKISKLVHKTEFKPMKAFMKEHEVNRGYVVC  
LEETSRKIKLDEDKEIIILPVEQFLANLWEKKLI

>gene\_837|GeneMark.hmm|46\_aa|+|18433|18573 >NVVL01000046.1 Rickettsiales  
bacterium isolate NORP64 Contig\_source1382A\_23537, whole genome shotgun sequence  
VPLEIISKRLGHSSIQTMMRYAHLADEQICNATNNLSEAFGKAMEI

>gene\_838|GeneMark.hmm|344\_aa|-|18608|19642 >NVVL01000046.1 Rickettsiales  
bacterium isolate NORP64 Contig\_source1382A\_23537, whole genome shotgun sequence  
MKFHLHNSLNFIQLFVLLNIIFCCTNCLARNHTLEEYNTIKQAKHNSNNASKENFVPASC  
SIVKATNGYPLLKNFNKVPNNSLYKYFNDISKKIPLGDFMLGYLHESGAGKKADGARAMK  
YYNKALKRGSVDAMYLIALKKHSSITDHMVFGKTTFAFAKKEYKESLKLFLKAAKLNHDF  
AQIMVATMYINGEIEYNNYKVAEKYIKKAIKTNEIDGYTALGAMYRDMGNFNKGTKYLEL  
ASNKGSVVASIILFQDHLCTGDKDIDAILANKYKLAIDNAKAQSVSIQDIDFIFVDKCK  
KTFDLDKKQVFLYTSKDVLDNDFLSKNRYDVGIIIPSVFDSIIKNH

>gene\_839|GeneMark.hmm|407\_aa|-|20228|21451 >NVVL01000046.1 Rickettsiales  
bacterium isolate NORP64 Contig\_source1382A\_23537, whole genome shotgun sequence

MKQIGQIPQSLLYCLISLSVLTEAIYSVALPNIAEQLN TDGGIAQLSTTAYHLGFTVGIF  
TLGRCSDIYGRRPVILFGISFYIIATYLITLSSNIETFIAFRFLQAYGASVGSVVAQAMA  
RDSYKGWELTYIYASVALVMSIVPSFGSAVGGYIVEYSEEWEDVFRFLIVVSSILLIYA  
KFLPETNAYIGSGRSNRFSVALRVALRDKLLSSAFIVGAYNGIMFSFYIQMPFIFIERM  
KMPPSEYGQLFLALTVANMAGGLFSRYLVKRFVSNRMRKIMGLTFSCIACLGLLGSTLWI  
SETSSITFTAMMIFMPMSIHLMGHALIVPMMLKNALKDYYKVVG TAGAIFGALYYLV TAL  
VSLMISLLHSNTINNYAYIYATLMVMCIGLLFMTFKWQNNATEPTFN

>gene\_840|GeneMark.hmm|363\_aa|-|21474|22565 >NVVL01000046.1 Rickettsiales  
bacterium isolate NORP64 Contig\_source1382A\_23537, whole genome shotgun sequence  
MTLKCIGVGLPNVGKSTLFNALTASANAEEANYPFCTIEPNTGIVSVPDSRLANLAENAG  
SAKIIPAFIEFVDIAGLVKGASKGEG LGNKFLSHIREVD AIIHVLRFCEDVDVTHVHDKI  
DPIEDA EVIETELIADLESVEKRVSGLT KAKSDKALLEELLELLKECQKILEQKPIRS  
MQNV DQKKLAGLQLITSKPVLYVCNVLESEATSGNAH SKNVEAMAKKEGANHVVISKIE  
AEISNLESEEEKQEF LGSIGLSETGLSKIIKSAYSLLDLMSFFTIGPKEAHAWTFEAGAL  
APQAAGIIHTDFEKG FIRAEIISCM EYLEIGSEAKAKELGKMRVEGKDYVMQDGDVVHFR  
FNV

>gene\_841|GeneMark.hmm|33\_aa|+|22647|22748 >NVVL01000046.1 Rickettsiales  
bacterium isolate NORP64 Contig\_source1382A\_23537, whole genome shotgun sequence  
MVFLTKGRGVLISVQAILTLILENERVLIGLSI

>gene\_842|GeneMark.hmm|504\_aa|-|22812|24326 >NVVL01000046.1 Rickettsiales  
bacterium isolate NORP64 Contig\_source1382A\_23537, whole genome shotgun sequence  
MGRFNKTKGKTRAEARAAAKKQKAEQ LRAALKTMNEQFSLNDDASREEHFNAAKDLMQ  
RCMTNLDLLVPRALANFVAVRAGLFEYC NNNPSNNMMDYSPLSLATNEDLSPELR TLLH  
KTGRYYFKRMKCE DP IEQETNLQHSV TAFHQVIKLE GELGLNEDFSLAQIKIPNINKIL  
AESFFILGCNYIEEARQNDHASKTETLETARDHLKRSLDIYKLTHSISTQIFDIHYNLGK  
ALYHLAVAKQD TDDGLL TQAENHLREALEFYVRS SHTKNITRTL IYLLKISIALNDGENE  
SPEKTIYGELLDEI EATQEVSSDFRGRFNEWKATQNAANKSQCIEGYATTAPALPLSDAE  
EVK GALPEVPGLLSSEISFPTEYASSDDELDWDS DLSLWNEARKISDDL TPTISPEL SGP  
ETEADGAW EELQRPDLDPEDDTDSEPDSSGWSPNKAS AIGSPSVDTGWGAWFFGSSNAPS  
IAPAPELKNAGETTPLACDSSDLP

>gene\_843|GeneMark.hmm|327\_aa|-|24521|25504 >NVVL01000046.1 Rickettsiales  
bacterium isolate NORP64 Contig\_source1382A\_23537, whole genome shotgun sequence  
MKFYSSGLADLIRKIEKGDVKSLLIHGVNHGFATTAIEQITKKLGLSVTNLTYKEVSAGK  
LSLIANNQNFFGQKELIKISDTTTAINKEMKTLITDSQFYHFICFVSNDSLPASGIRKFF  
EDKPNLASLGCYYDNEQTI AKMIVQQCKKRDKSIDEALFY LKSHLKG DQQI KSELQKL  
FYTHDKPNITKDDILKTLSPDLLASGDEMCIFFAQKEPMRFLNEIEKLSQGKNEV LMI  
RALIRYYLNIYNVAARIEDG SNIDIATRS LTPPIFFKYVDSFKRAARKTSSSDAIKILAA  
LQDAEVSFKTNPSSFDLFETYIRVHGR

>gene\_844|GeneMark.hmm|176\_aa|-|25505|26035 >NVVL01000046.1 Rickettsiales  
bacterium isolate NORP64 Contig\_source1382A\_23537, whole genome shotgun sequence  
MNMLVLGEILTKYRSIFLVFTLLATLTSCGFHPVLSSGGDACTRELLGQIELSSMQSIEG  
ADFYNRLKNILPYGREKKYLLKTTLSFSKDFSIIQKNSDILREMVAARVSYSLRDKETGK

IRISGSFSRLSSFNTTFSPYSNQVQQYNVQKNLAIMSAEEVRNRIMLFLERENKEK

>gene\_845|GeneMark.hmm|716\_aa|-|26151|28301 >NVVL01000046.1 Rickettsiales bacterium isolate NORP64 Contig\_source1382A\_23537, whole genome shotgun sequence  
MKEKIIIDANFPTEIRVARLDKHNIEDIEFSSSNKTQVKGNIIYLAKITRVEPSLQAAFV  
DYGGGKSGFLPFSEIHSFYHSFSTEKKSSNLVGEELKSPEITSEDLAEKPGGTFKFNELA  
DSDAIDIKAIKMOVDEKLQSDINIEASEDDVDAFSNDSAEQNKQYKIQEVIRKQVLLVQ  
VTKEERGNKGASMTTYISLAGKYCVLMPNKP SHNGISRKVSNRDERRRIKNVISSITELE  
DSKTSSVIARTAAAGHTTLDIKRDYDYLVLKLNKIREITLKSQAPCFVHQEDGIILKTIR  
DMFNRNVKEILVQGSEAYNSCIKFMGDIMPTHVRSVKEYKNKTPIFTKFGIEDQLIKLYQ  
PVVHLPSSGGYIVINPTEALVSDVNSGRATSERNIEEMALKTNLEAAKEIAKQARIRDLS  
GLLVLDLFDLNEARNRILERSLWEYFGKDKARIQTSHLSAFGLLEMSRQRLRPSFLERN  
SDMCSHCSGKGLVRSDDSNAMLILRTVENEIHNGKFDIVNVYGAASAVIFLLNSRREEIS  
FIEKKYSIKLDFIDRATSDSYSIEKIKLSDKNKADTPEELQPILQDTSEIYNQNSSQQ  
KTKRKIEKAKRPQEKKKPKAPEETASSNSTSSNNNSNTSNTNNSNKEAENQTQDKTQNQQT  
QDKNETPQAKEEQTAKPARSKKRIPRKRPRRGREQNKPAPT VKAEADKTPQGQDETT

>gene\_846|GeneMark.hmm|392\_aa|+|28553|29731 >NVVL01000046.1 Rickettsiales bacterium isolate NORP64 Contig\_source1382A\_23537, whole genome shotgun sequence  
MMRKRTILAFFAYSFCVVAYFVPIFANSIFIEGYLSRQSINFIEHDQIDAMHIYGYVVAT  
ILLLVFFRYVAFKKLITFSVFLYILSTFAIVLAPLNEGVSWSWFFLHSASLIITPILMLW  
YILCDDKINNNYSIAIYFSSILTAYLVVELVGYFIIYNQADFPLEGMVVSNLIPFGVFGS  
ILGLSAVYEARIDGDDEQFYSIMRNMEIESLVGFTVFYVLILMLRGYDLYALINHLVILE  
VRDIQFIMFIAMVIAIGVTIFLPFQVGEQKFNRHKLSISCIALMMILFTTLPYWGLYYIT  
DIVCWFILGVLFYLLFSFHLLILSEKFDGINLFTALAIYALICCFGCYSGYLVGASSENT  
IGENGLISISFVLLGLLLYMYFSKHKHLYK

>gene\_847|GeneMark.hmm|444\_aa|+|29731|31065 >NVVL01000046.1 Rickettsiales bacterium isolate NORP64 Contig\_source1382A\_23537, whole genome shotgun sequence  
MTKLNIIIGGLAGAEAAWQAANRGVEVNLYEMRTASRKTPAHQTDKIAELVCSNSFRNDD  
PASAIGLLHAEMRLMNSLIMKAADMTKVPAGSALAMDRDLFADTVSKELHDHPKINIIRE  
EVQDISSEGHWIIATGPLTSDALSEQIQKLTGEDQLAFFDAIPIVYKESIDFDIAWFQS  
RYDKGDEVEGGKDYINCPLNKAQYHNFIALLASETTEFKWEKDTPYFNGCLPIEVMA  
ERGVETLRFPGMPKPVGLTNQHDPQNKPYAVLQLRQDNKLGTLNMMVGFQTKLKYGSQKEI  
FSCIPGLEKAEFARLGLHRNTFINSPKLLGSKLELKCLPNVRFAGQITGVEGYVESAAM  
GLLAGMFASCEINGKSVQIPPADTAIGSLLAHLTNGADSSTFQPMNINFGLVPLEERIR  
SKKERYTALS DRALASLQEWKGG

>gene\_848|GeneMark.hmm|610\_aa|+|31090|32922 >NVVL01000046.1 Rickettsiales bacterium isolate NORP64 Contig\_source1382A\_23537, whole genome shotgun sequence  
MDKISNDELLENL GKASAYYQEILQYILNNSKAEASFYIDNKRNQEMVAKMAEQFLEHP  
DKFINLNMEYVSNFQNLISDSLKFTGSDKQEQQS QSATDEKGAQEKASQTKDKYDKRF  
QDPAWTENVYFDIFIKQYYLITSDWMRKNVKQYDLVNSKRYIEFATQHFDALSPSNFAF  
TNPEVLKESLDSRLENIVNGMSNFLDKIKKQGNLFDISTTDRSFFRVGKNLAATSGKVIY  
QNDLIQLICYEPKEKTR SIPVFIVPPWINKYYILDSEKNSMVKWLVDNMFQVFLVSWVN  
PKKKLSGKDFEDYLKEGILDPEYEQIKKLGFEKINAVGYCIGGTLAAALS YLKENNKQYI  
NSATFLTLLDFANPGEIGALINQDSLAEIEKTVNAKG YLDGKYLSNSFSLIRANDLVWS

FFVNNYLLGKAPTAFDILYWNADSSNLPKMYIYYLRNMYIENNLVKPNALEMLGTKIDL  
SKIDTPSFWLAAQADHIALWKSVDYSHQHIGGEKIFCLTEAGHVAGVVNPEGNKKYSYML  
GKDVGKDGVDQNNWKDAEEWQKNATNHKGSWWKSWKKWLTQNSGKLVSSIDYEKLDISIQA  
PGNYVKKYNH

>gene\_849|GeneMark.hmm|415\_aa|+|33004|34251 >NVVL0100046.1 Rickettsiales  
bacterium isolate NORP64 Contig\_source1382A\_23537, whole genome shotgun sequence  
MHHTPDTSYLYAAVESNRSQMSPARFGLMMAHQWLEHSNNPLSNTHFGSTLKASIDILE  
RVTRKYSKPEFGIKECVVNGNEEKIRQTTISKDTFCNLLHFSKPNFQKKQPKLLIVAPMS  
GHHATLLRGTVRDTLPFFDVYITDWIDASQIPITDGSFDLDDFDYIINYTKLLGPDLHI  
LAVCQPTVPVLAATAIMSADKDLHVPKSMILIGGPIDGRKNPTKPNHLAMEKDLAWFDQA  
LVTNVPPNYPGYRRRVYPGFLQLSSFMMNMKKHVDSHVDLFKNLIIEDDEKTAKQKEYF  
DEYLSVMDLPAEFYLTQIKVEFHDFSLAKGKVFVSRGRKVDLTAITKCALMGIEGEHDDIA  
AVGQTKAALKLCKNIPDKKKKYHLQKGVGHYGVFNGSKFRKMIVPEIKDFVYAND

>gene\_850|GeneMark.hmm|245\_aa|+|34335|35072 >NVVL0100046.1 Rickettsiales  
bacterium isolate NORP64 Contig\_source1382A\_23537, whole genome shotgun sequence  
MSATEKAQQVSTASSGADLSIISLVSSSDFVGLVILTLVLSVWSWAIASKLTHYSA  
LKKRIRAFETLFWSGQILDELYERVKQSVDNPLSAVFGAIKECKKSDASSSATRSSAAL  
IGHKERVLGAMYLARNRELETLDEKLGFLATIGSSAPFIFLFGTVWGMHSFQSIASSKN  
TSLEVVAPGIAEALLATAIGLFVAIPAVMFYNYLSSEVDSINNKIDDFIGELNALISRAI  
DEEKM

>gene\_851|GeneMark.hmm|147\_aa|+|35075|35518 >NVVL0100046.1 Rickettsiales  
bacterium isolate NORP64 Contig\_source1382A\_23537, whole genome shotgun sequence  
MAAHLNQRGGGNIPGNSRRRRKPMSEINVTMVDVMLVLLIIFMITSPLVAGIDVDLPK  
TDSAAISGQYKPLVISVNRKGELFLFETKLPKEKLEQLKDVTKERDVKIFVKGDKNVS  
YGTIIDVMSRIYNAGFTKVALISDIKH

>gene\_852|GeneMark.hmm|287\_aa|+|35518|36381 >NVVL0100046.1 Rickettsiales  
bacterium isolate NORP64 Contig\_source1382A\_23537, whole genome shotgun sequence  
MRNPENNFEEKAVIFSVLVHIIVIGLFFFLPSAFERLDNEKDIMTFFVLPMSAITNVKN  
ERTIQKKAKIAKSKQIKNSKTAAPPKPKSAQKPKIKNKPNIPAKKKKIKVVEKQKEM  
KQAPPKQKAAPERYKLKEDVIDSILKNLESESEGDSSKTPVKSFSARDKGSKYARGMEYD  
EDSPLSITENLLVKSQFEKHWRLPVGAINLQDVRVMMRIKVEKDGSIKIEIKDVVCPNN  
SEATCKLVTESAVRAVKQASPLENLLPERYNTWKEFDLNFDPQLMAQ

>gene\_853|GeneMark.hmm|439\_aa|+|36403|37722 >NVVL0100046.1 Rickettsiales  
bacterium isolate NORP64 Contig\_source1382A\_23537, whole genome shotgun sequence  
MKNFALFLICFFSLNAAVSSVNVTKGHS DPIPLAINNFAGVDPYDVKLAKDIVKVISND  
LKGSGMFRPISPAAFIEKKIGTRHKPLFAAWQQINASLLLNGDVSKLRSGLQVNFILWD  
SILEASMMSEFELPEHLWRQVAHKISDRVYKKITGYAGYFNSKIAYVSETGPYLKRIKR  
LAIMDQDGENHRYLTDGKDLVLTPrFSPDAKKILYLSYKNELPQVHMLDLRTGRSSLIGN  
FPGMSFAPKFS PDGKKALLSIAKDGSTHIYEINLRNKR MKQLTKGISINTSPSYSPDGKK  
IAFNDR LGMRQIFTMNRDGSNKQRISFGGGNYAEPNWSSRNYIAFTKITRDFGFTIGVM  
SPNPHE SQNRERLITRGYLVESPAWADNGRVLVFTKGMPPRGKRTKGLNRIYIDFTGYN  
ERIIPTPHDASGPDWSKNL



>gene\_854|GeneMark.hmm|362\_aa|+|38041|39129 >NVVL01000046.1 Rickettsiales bacterium isolate NORP64 Contig\_source1382A\_23537, whole genome shotgun sequence  
MINNQTTITLYLAKTFFRQFLVTSVVVLCVLFITNAFDTLQKFKASNLSSIEFWQFTSYKI  
PYFFNKISSLVCFISTLMFLRTIVQCNELIIILNSGIPLWRVFIPIIIMAFILIGIVVLFV  
SSPIGTHGLQEYKLEAKLDGRENMNFTLTSGIFFFENFDGVKRVIQTRSITPNKKILS  
DVTIFLIDSENNLTQRIDAKKAILENGVFKLKSLLTISRKRSETLEEELEPSSLSIENIM  
QRFSGSPDMIHLWNMNNVIDKFSSSGLVVTTYQIHLYKQIFNPLFMATMTFVACWVGLNT  
RSRSNAKMHVGLTLGVVYFFLEIVLRVLAYSAPPIFATLLPMLFIILVSNFVILHFQ  
EG

>gene\_855|GeneMark.hmm|347\_aa|+|39184|40227 >NVVL01000046.1 Rickettsiales bacterium isolate NORP64 Contig\_source1382A\_23537, whole genome shotgun sequence  
MKLLSFLDRFSSDIAIDLGTANTLVYEKNGKIVLDEPSVVALINENGIFKPYAFGQEAKN  
MRGRTPTDIEAIRPLRDGVIADFKGAEEMIKHFIRSVKDKRSFTGPLIIICVPSGSTPVE  
RRAIQEAAESAGARDVYLIEEPMAAAIGAGLPVTEPTGSMIVDVGGGTTEVAVLSLGGIV  
YARSVRVGGDKMDEAIIISYIRRNFNLLIGESTAEEKKQIGAAVLEGEPLKEMEIKGRD  
LINGIPKEMTLNEKQIAESLAEPVSKIVEEVKNALECTPPELSSDIVDKGIVMTGGGALL  
KNFDHVLREATEL PVFAAENPLACVVLGIGQVLEDFPKLKHVLFKQD

>gene\_856|GeneMark.hmm|279\_aa|+|40233|41072 >NVVL01000046.1 Rickettsiales bacterium isolate NORP64 Contig\_source1382A\_23537, whole genome shotgun sequence  
VAILINRVKIRNLLLELKGFTLFSIRRFVLTIVVSCYLLYFSPVNIIVTTSLEEVGKT  
LSAGVLIYNGSIDSVKLAYGRLSYFKDLESENRLKLELTELKIKQLALDARVENQALR  
QMLRVPPKLRNMFVTAKIVGVSSTPFASSAVIQAGEADGVRVNDVVKGKSLIGRITIS  
KNYSTVVLIDDHNSRIPLITSNSKARGLLAKQGDRKMIHLKEDHTATIGEMIYTSGDGK  
IYPKGI AVAKIERVTHEGVFVKLVEHFDDMEFVIEESTL

>gene\_857|GeneMark.hmm|677\_aa|+|41107|43140 >NVVL01000046.1 Rickettsiales bacterium isolate NORP64 Contig\_source1382A\_23537, whole genome shotgun sequence  
MEEIEQTENDFIEIPRSGTENTVDGVYKIHLTKELSDLSNEFCKYYHTTNNATKENFFSI  
VFENNFLAPLEYIDSLMRNPINGLNNIVTYSIAKLSSTKREHLVVIVDSYDEGSTLAAHL  
ESAGTLSLEQIEAMVRKVTHLITRLQDNNIYGCSINPSNILMRDGKFFCIREFINSYPLF  
HQEIPYIAPEIAECHEAARFNPTVKGDVYALGVYALYAYIKPGFLDDYEDAWDYNFARFE  
HTTYKYLNNNEKIPERLRTFLKWLHDDATIRWDIDNIDLWLGHENSKIHYDSLNEKKSS  
IEFNRSYSTMKSLAYGMFNHWSDAISVTKDSKLFKWASYIQTNTDILDVIKEILNTKSD  
TSFIVTNAINSNAKIAKLLSVLDPNGPLRRDGLAVSAEAIPGFLYLLVTNKKAMINSVI  
TLMKDETWFYADNKDIAGHLSLGSDFSFAAADSTKSSSIARGVERLVYSLNPNASCHS  
ALLKGMYITNIAELLVALDDFAKNTKRFNIDRHITAFIAAKLDLKDVKPITFQNFPKL  
SENSVIKGLSIINLLHQHEPEIEIPNICKVIGNDLNLLKEHLHNVEFKKELTSQIEEVA  
QEGNIKGIKLLSNQQQFINDYNGYREACQEAKNLKKKIKSLTNNRGIFDKSLLLGQKLT  
VLLSYVLCFLVTVAIV

>gene\_858|GeneMark.hmm|151\_aa|+|43165|43620 >NVVL01000046.1 Rickettsiales bacterium isolate NORP64 Contig\_source1382A\_23537, whole genome shotgun sequence  
MSKAVSENNFQFATSLIKIIAIVISLMVIVVSWYAFIFFIGTMLPTIFAIFYDRNRHRCL  
SATVCSFNLIGVLPYMIIRIWESSVVDYLAKQLLTNIDTWMMIYGTAFIGQLLYVSMPLVLI

VKLYEAKTKVHISNYQNQHKEKCAKWDLGDC

>gene\_859|GeneMark.hmm|394\_aa|+|44031|45212 >NVVL01000046.1 Rickettsiales  
bacterium isolate NORP64 Contig\_source1382A\_23537, whole genome shotgun sequence  
VRHGLTLGSGIAKMILETYPSKKEELYNEHLQEISGANFTFRELDIIACIIHNRGEKKIA  
SLLSISYRTVGSVHRNIMSKLGYNSREYIIDAVEKSGKLQYVRQYYFHLVMEAAFEKYLK  
KIRGLANRSGIVCATDFNNVTEEEKSLELFTESLALANITLTDINLLKAEGSYEKARHN  
LHIISMKSVNKLGLYQNIKDAENNSEETTGENIEKNVKKTTQENENRKNIHAVYFDKIDL  
LTVQDMEHVDFRSKSNYYFVLELIGKLTGKPLVAEIIQEFKDAHQDLQKSWAGTGIAGG  
EFSNGSSYFTSKNAAIFAACVGSIIFFMYLLVWNNTPENNNNSNGLQVASHNKTEIWN  
LPKQLPTNKKVSNIIITPVSYFVDHVRQLHQLKEN

>gene\_860|GeneMark.hmm|323\_aa|+|146|1117 >NVVL01000047.1 Rickettsiales  
bacterium isolate NORP64 Contig\_source1382A\_23569, whole genome shotgun sequence  
MRQAGRYMPEYMAVRAGMDNFLDLCYDSKASKVTLQPVERFGFDAIIFSDILVLPHAL  
GWDVAFKQGEGPVLRFKFESEKDLISDNFSAKINNIYDTSKVKGALPKNVSLIGFAGS  
PWTVASYMLEGKQDFSVSKNFLYTKRSLAEKLIITEKTIEYLSGQIDAGAEVIQLF  
DSWSGMLSGSEYHDFVIKPTKRIISALKQKYPHIPVIGFPRGAGYNYDQYIKHAGVDAVG  
VDQFTPLSQMKKWQEEIVVQGNLDPVILLGSKENIARVDEIFASMGGKGSKNFIFNLGH  
GILQTPVENVEYLVDYVKNCQK

>gene\_861|GeneMark.hmm|378\_aa|+|1074|2210 >NVVL01000047.1 Rickettsiales  
bacterium isolate NORP64 Contig\_source1382A\_23569, whole genome shotgun sequence  
MLNILWIMSKTVKNKRTKIAEKSVADKLVNNKTAIILFNLGGPDKPSSVKKFLFNLFND  
KHIIPLAIFRYVLAWFISFRREDAAKKNYAHMGGKSPIYEETKKQADALREELSGKIDS  
EFEFISMRHWHPMSEVAARLRDYMPEVILLPLYPQFSMTTSYSAIEDFKNSMHRNFS  
KSAMSKIVLKTVCYPDEEYFIKSHAELITESIGKIKNDNYRILFSAHGLPVKNIKSGD  
PYQWQJENTVKSITNLLSIKNLDYKITYQSKVGRLEWLTPSTEDEIKLAAEQGKEMIIVP  
VAFVSEHIETLVELDIEYKEIANQYGVNYIRVPALGINKSFVKLSLRTILKFSKKEGEFL  
SSASMSRICPKNCNKPC

>gene\_862|GeneMark.hmm|145\_aa|+|2236|2673 >NVVL01000047.1 Rickettsiales  
bacterium isolate NORP64 Contig\_source1382A\_23569, whole genome shotgun sequence  
MEDYFLWYKAIHISVISWMAGMLYMPRLFAYHTKAETGSEMDKVFQLMELRLRIIINP  
AMILTYFFGLLTAYIYGCVLGMWFHMKMLMVLGLTIFHHFLARWRKDFAKGENKHSEKF  
YRIINEVPTIMMVIAVVMVVVKPFE

>gene\_863|GeneMark.hmm|111\_aa|+|2708|3043 >NVVL01000047.1 Rickettsiales  
bacterium isolate NORP64 Contig\_source1382A\_23569, whole genome shotgun sequence  
MYIFGVALHLISIVALTNESLTFSELLILCVIISLFSKAKELSEIDKTSIYNPFLKAVLV  
RCLILSFPRELVVTYGDTALLYLLYMVIVVGMMDLYQTIKIIQPFMKRAN

>gene\_864|GeneMark.hmm|314\_aa|+|3079|4023 >NVVL01000047.1 Rickettsiales  
bacterium isolate NORP64 Contig\_source1382A\_23569, whole genome shotgun sequence  
MNMKTIIIQSSPIRLDRYLRRREFSNLTQGVIEKALRSGAVKLNDSKPKSSTRIQKDDIL  
TIAEGAFPDKLAGNAGDTKHFSQNVIALAEKLLSKYLLFSSDEFIAIDKPCNLATQGGSK

ISLSVDDALAYLNSQENSNDGYKLAHRLDKETSGILLIAKGAENAARLGTAQDKLIKKT  
YIGLLSSCPAELEGKIVNIGKDRSGIFEVKELASGGKLAETHYKVLKKGSSVLVQFN  
PLTGRMHQLRFHSHKIGCPIIGDKKYGGKESARMFLHAQKIVISPAVFGAEIIIESPPAE  
EFGFDADVAAQISG

>gene\_865|GeneMark.hmm|219\_aa|-|4024|4683 >NVVL0100047.1 Rickettsiales  
bacterium isolate NORP64 Contig\_source1382A\_23569, whole genome shotgun sequence  
MAKLFYVGVPKLVRTHCTCKALPSNEASSNEPSSSELYETFTMMHNSLNVNAIREKSL  
GSFLQRNPYIRIDNDTIKTISSILSCSSTEVTINIFTELRYLLEKIPKEHLNAYIAHLKT  
LEVSDTVDILAESIYALQTLQWLQTPPEIKGVVQESQKSPAPPEIDALIISYILPVETV  
LDGSQKISFSFFKQPHIDAPSPPEIVDITGQEAGELAAS

>gene\_866|GeneMark.hmm|547\_aa|-|4859|6502 >NVVL0100047.1 Rickettsiales  
bacterium isolate NORP64 Contig\_source1382A\_23569, whole genome shotgun sequence  
MFSVLSSGKVSCLKYIVTMENSKKTGFLAELRKIFWPIEWHENKKFIPMALMMACILFNY  
ATLRSVKDGLVTHIGPEAISFLKTYVVLPSAIMMMIAYAKLCNMMSQKQVFYTVTSFFL  
GYIAFFAVFLYPNEAFHPSASTISALIEEYPNFQWFIKIAGNWSYASFYTISELWGSMM  
LSLLFWQFANQITKTDEAKRFYSMFGLLGNVALPLVALTLWFFMSEDTHIVPDDVKLIPV  
LCITIVSGLTILFLYSWINRNVLTDPALCDQEKPNSTKAKKLSLGESEFKMIFTSKYL  
LIAMLVLSYGVSNLVEGVWKAKIHELHPTVEAYTSYMGTFQAYQGFVAIFFMLVGSNIL  
RRVSWQTAAIFTPIMILCTGLAFFSFIFFGDTMGLQVAAFLGTGPLAMVVMIGMAQNVLS  
KGVKYSLFDSTKEMAYIPLDDEMKTGKAAVDVIGGRFGKSGGGIIQSTFFILMPAASF  
EATPIFASIFFGIVVLWVVFVRALGKEYNKLLRQEMLEALNADYEDLDDLDLNLKADKN  
SKSDSKA

>gene\_867|GeneMark.hmm|306\_aa|-|6524|7444 >NVVL0100047.1 Rickettsiales  
bacterium isolate NORP64 Contig\_source1382A\_23569, whole genome shotgun sequence  
MNNPFSHPRVTHNLHFITKYKFLEQFESFFPEDTLGSSSEVKSFTVDSQPNDLWSMEVY  
LPAEPDLKLLASELSAFAEQHDLEIESELTKQJEDKDWVAEYQSQLKPIIAGQFFITSS  
SAKAACPKEKTPIFIEASRAFGTGDHATTSLCIEAMEALS DIKFKNIFDIGTGSGILSFA  
ADKIWPGTQLLACDIEEISVKLAKENQIHNSHIDFYQNTETDLAIPDSRVGKFDLIVSN  
ILAKPLISMANSIRQITSQECRVILSGFLDYQENEVTNAYITEGFEVEEVLRRNSWVCLT  
LKVKRY

>gene\_868|GeneMark.hmm|124\_aa|+|7519|7893 >NVVL0100047.1 Rickettsiales  
bacterium isolate NORP64 Contig\_source1382A\_23569, whole genome shotgun sequence  
MNKIRNIAICLCLTFANITIAADKSGVSKSKTKLRDPAEFLRVIDDYKAYVATVSPETR  
DEIIVYRKEIAKLNKEKKLFYRKLKSKNAQGYLKQEQQYKKKLLPLNRKSLINIQTGQKKS  
RKKG

>gene\_869|GeneMark.hmm|61\_aa|+|8014|8199 >NVVL0100047.1 Rickettsiales  
bacterium isolate NORP64 Contig\_source1382A\_23569, whole genome shotgun sequence  
MTGAGVIAQSVERLDGIQKVGGSIPPNSTSAPLELRLAGQPIHCYETSFGNIVIQNVQPI  
F

>gene\_870|GeneMark.hmm|193\_aa|-|8263|8844 >NVVL0100047.1 Rickettsiales  
bacterium isolate NORP64 Contig\_source1382A\_23569, whole genome shotgun sequence

MKKILLTAMATTMLASPSAYAMEDVFYIKANAGLSQLSKIQTLKSKNKLFFGAGIGYNVI  
DSVRIELMLEHFSDPLHKKGDVKLQGGKANTLMFNGLVNIFDAHLVNIFVGAGAGFSEVSA  
VKSGETDAANNGEIKKKHNLAFAGYLGASWELGGTASLEITYSYRDLGKTRQLNEKSFHY  
KGGHLSAGLRFDI

>gene\_871|GeneMark.hmm|82\_aa|+|8961|9209 >NVVL01000047.1 Rickettsiales  
bacterium isolate NORP64 Contig\_source1382A\_23569, whole genome shotgun sequence  
MLLPVDMDCHESEHKPGGGDRHECGARFESGHEREAGHEPHNNHEIFVADDLFSQPYYLH  
LQGGRRALLHAENAALECYRFS

>gene\_872|GeneMark.hmm|103\_aa|-|9332|9643 >NVVL01000047.1 Rickettsiales  
bacterium isolate NORP64 Contig\_source1382A\_23569, whole genome shotgun sequence  
MQQPKPVITKDKIAERLKGRLGLSSVICEITSHIFSEILNITEQEGKMLMLKNFGVWRI  
NHKAARVGFNIKSGNSVRITPRSVLRFIPSKSFKEQINKSDAE

>gene\_873|GeneMark.hmm|332\_aa|-|9698|10696 >NVVL01000047.1 Rickettsiales  
bacterium isolate NORP64 Contig\_source1382A\_23569, whole genome shotgun sequence  
MASKIIGSGGYLPTKVLNSDLAKSIDTSDEWIRSRTGITQRHIAAEGEYSSHMAHKAAL  
AAIENACINDACINDARINDAGIDASVIDLIIVCTNTPDNSFPSTANKLQGYLGLGNIPS  
FDMQAICSGFIYGMQVADSMIKSGKYKTVLLVCAEKMSLLNWQDRGTCILFGDGAGAVI  
LQQTDSDSGIISNIYSDGSMYDMLYTDGGVSMNGKSGQVQMKGQEVFKKAIEKMAESTG  
LLESNNLKISDIDYFIPHQANLRIINSLAKKLNIDDKKIITTIQKHANCSAASIPLAFH  
ELKSKGLFKPGDILAFTAFGAGATWGSLLVRW

>gene\_874|GeneMark.hmm|65\_aa|-|10704|10901 >NVVL01000047.1 Rickettsiales  
bacterium isolate NORP64 Contig\_source1382A\_23569, whole genome shotgun sequence  
MAVPKKTSTSKRNMRRSHDALSRINIIVDKDTGEYRLPHHVDQSSGSYNKRQIVIAKAD  
STDSE

>gene\_875|GeneMark.hmm|174\_aa|+|10969|11493 >NVVL01000047.1 Rickettsiales  
bacterium isolate NORP64 Contig\_source1382A\_23569, whole genome shotgun sequence  
LYYISLTKSRIFYIKNFMTQLNTYFLRLFSAILLLVLTGCQTIDVRGQFVSDTAIEKLSA  
QKPTKQEVTDMIGSPTYIPDYSKNTWYYIQRSLARKAWFTPKVTEQRIIKITFNSKDKLK  
KVQLLENLQENISAKSQFTKTHGTEKSGIQTFVKNIGRFNKTSTGNSRSKSKK

>gene\_876|GeneMark.hmm|100\_aa|+|11651|11953 >NVVL01000047.1 Rickettsiales  
bacterium isolate NORP64 Contig\_source1382A\_23569, whole genome shotgun sequence  
MINDDELKQLKLSKLSFQPEELKTFSAKLAGVLDMIDEMQELDISGVKPLRSVLDGSQR  
FREDKIENSISEDLFKNTPEEIAEFAKEIKCFVVPKVIE

>gene\_877|GeneMark.hmm|493\_aa|+|11955|13436 >NVVL01000047.1 Rickettsiales  
bacterium isolate NORP64 Contig\_source1382A\_23569, whole genome shotgun sequence  
MNDLIKLSITEALSAMKEKFTPSELVEAHIKSAERTKNLSYITETFD SARLLAEKADQ  
HYNNGTARKLEGIPVAVKDLFCTNGVKTTAGSKMLSNFSPTYDSTVSKNIADSGSIMLGK  
TNMDEFAMGSSNTTSYFGNVISPWKEIGSDKDLVPGSSGSSAVSVSAFSSMAALGSDTG  
GSIRQPAAFTGIFGMKPTYGRCSRWGMVAFASSLDQAGIFTRSTDAALMLEAMMGFDEK  
DSTSIDQSVPELVSACKKSVKGMRVGVPTDLMELDGINSEIVKMWQDSIAMMRAEGAEIV

DIKLPHAKYALSYYYVIAPAEASSNLSRYDGVRYGHRDTKTLNLDMMYIQRTEGFGE  
VKRRIMIGTYVLSSSHMDAYYTKAQRVRRLLISNDFKDAYQKADVILLPSTPTAAF  
GIHDN QDDPRAMYLNLDLFTIPASLAGLPCASVPAALSVSGLPLGMQLVAPALDE  
YNVLRASAVIE RATSDIDFTPCKGF

>gene\_878|GeneMark.hmm|481\_aa|+|13437|14882 >NVVL01000047.1 Rickettsiales  
bacterium isolate NORP64 Contig\_source1382A\_23569, whole genome shotgun sequence  
MAYITGNTGEWEYVIGLEVHAQISSNAKLFSATATKFGANPNTQVSLVDAAMPGLPVLN  
KYCVEQAIKTGLAINAEINKLSVFDRKNYFYPDLPQGYQISQFYLPVQNGHLILTLEDG  
SEKKIRINRIHLEQDAGKSIHQHPDYSLIDLNRSGIALIEVVTEPDMSSPYEAAEYVKK  
LRNIMRYVGSCDGNMDQGSLRCDANISVRRPGGELGTRCEIKNLNSIRNIVKAIEYEAMR  
QVELLES GGVAQETRLFNTEGETKTMRSKEDANDYRYFPDPLLPVRVNDDMIERLRS  
ELPELPDAKVGRYISELGLSKYDAEVIVADGAITDYFEEASKGASAKLIANWLTS  
ELFR LNKNSMSLAECKITPSMLRDMVVLIEKGTISGKIAKTVFDDMFESGQAAEKIVKEKGLTQ  
MSDRGSIEPIIDEIIKANPDSVEAYRGGKDKLFGFFVGQVMKKTGGKASPQM  
VNDILKEK L

>gene\_879|GeneMark.hmm|263\_aa|+|14952|15743 >NVVL01000047.1 Rickettsiales  
bacterium isolate NORP64 Contig\_source1382A\_23569, whole genome shotgun sequence  
MTIKIHTQNDFAKMRIAGKVA AETLDHITEHVQVGVTDDHIDKLCHDFMVSKGAIPATLG  
YKGYTKSCCTSINHVVCHGIPSDKCLKNGDIVNIDVTAIVDGHGDTSRMFYVGDVGVKQ  
ARLTQVTEAMMLAIDKVKPGAHLGDIGHAIQTHAEKHNYSVVRDYTGHHGIGRVFHDEPS  
VLHYGKAGKGVVLEEGMFFTIEP  
MINAGKYITILSKFDGWTVTTRDKSLSAQFEHTIGVT KDGAEIFTSSSKNWLYPPY  
GQKK

>gene\_880|GeneMark.hmm|232\_aa|+|15727|16425 >NVVL01000047.1 Rickettsiales  
bacterium isolate NORP64 Contig\_source1382A\_23569, whole genome shotgun sequence  
MDKKSDDKQPHYLGHKRLKDKFLSNARSTLGDYELLELLLFQSIPRRDVKPLAKSLLQ  
KFGGLRQLVHADKEMIMSVDDMTEGSFLQLKIIQEMLSRILYEEVQKNKNISSWGALLDY  
LKFNMGCLKIEQFRVLFNKRNALIADEV  
MATGTIDQTPVYPREIVKKALFYEAGAILV HNHPSGNPDPSKADIELTRQISTACKTINVT  
LHDHVIIASNNYYSFKTNRL

>gene\_881|GeneMark.hmm|101\_aa|+|16422|16727 >NVVL01000047.1 Rickettsiales  
bacterium isolate NORP64 Contig\_source1382A\_23569, whole genome shotgun sequence  
MKLVKDEVNKLIYKIFKRKHPILAEMIINWGRIVGIFSDKSMPPFKIVTSKEAGKKINIL  
YITTESSTISMQMAYQQDLMIERIAVYLYGKGIHKIKILT

>gene\_882|GeneMark.hmm|102\_aa|+|16741|17049 >NVVL01000047.1 Rickettsiales  
bacterium isolate NORP64 Contig\_source1382A\_23569, whole genome shotgun sequence  
MKDHDIEFVQESERIITEIADAIEDQDEECLIDVDLNSSILTAEQGT  
FVINKQTAAQE IWLSSPISGPYHFKDKGYWRSRDGTELFEILAKELPINIKW

>gene\_883|GeneMark.hmm|601\_aa|+|17055|18860 >NVVL01000047.1 Rickettsiales  
bacterium isolate NORP64 Contig\_source1382A\_23569, whole genome shotgun sequence  
MISNNVKQLAEYLALHIKSLIVLVLSLSIVAASLLSIGYVFRQLIDHGISNNQLDEIHGA  
IYWIILLIAVFSIGSFFRSYFINLITVKVISKLKTDTHSNLLKIDLVAFEDLKVGDII  
SR LGSDIELIGGLIINFLSFFIRNSIMLCGAILMFIQSPKLSLLVLVSIPLLLFPLRLSK

YVRRLSRSVLDEQGILASNIEENFTAIRTLAYNQQEFIANKFNNHIAHYIKHAGLRFRA  
RSLFFALAIAGSITSVIWIGSVDILSGSMSSGQMISFIYYAVIVGTSAAAGIAELFSE  
IQAPLAALDRVLELKHKLVAQKSGVMQELSANGGGSKEIPTKVVPAKVVSSGDCSIRFEK  
VRFAYPARADLVVLDGISLEIEHKKFTGIVGKSGSGKSTLMQLLLKFYNHQSGDIFIGSD  
NINTLQDSLIRSKIAYVEQHPTIFSGTIKSNIAFSNPNATEAELREVAEICGILDFAKDM  
KDGLDTPIGEKGVRISGGQKQRIAIARALIYRPEILLDEATSALDNASEKKILQNIIRSL  
MKSKTIISIAHRISSIEDADIILVIDKGVLESGKHAELLRNSQIYNVLYKEQSDLKLAD  
K

>gene\_884|GeneMark.hmm|154\_aa|+|19022|19486 >NVVL01000047.1 Rickettsiales  
bacterium isolate NORP64 Contig\_source1382A\_23569, whole genome shotgun sequence  
MNKVICLIMNLISLFIAQTSLASKPGAADANHSSVLEISDAWARKSMSPNNNSAAYMKI  
HNPTDEQITIISASAMVVANNVELHKSFVDEGGISRMTAIDKIVVPAKSTIELKPGGIHI  
MLIDLKYSLEGNKFIKVKIQNSDPIGVETMVK

>gene\_885|GeneMark.hmm|328\_aa|-|19811|20797 >NVVL01000047.1 Rickettsiales  
bacterium isolate NORP64 Contig\_source1382A\_23569, whole genome shotgun sequence  
MQKLLTLITAVILYMIFEQRLDNASTSHIIPAQENINTSQGQGIGQTHGEGQSKGRSPN  
QASGTFLNLSNVVSNVLKTDEGRIFMKSMFQPMNNGSFGDGFEMNNNVFLNSMFKIMS  
FDEGVGMPVSCGHIVTVHYKILNMKNITLERTATFPLGSEEIAPGLDAVIVGMRTGQTR  
HATISNKYIPGTEQDKESSFKINVLLQEIMPKHVFGEDVKIFDSKLAYKRPLVCGNKTIY  
DARVTKLSNGEVLYDSKKRGEKINMRIGNIVYPVIFSHALHNKIPVGTRS VIAKGHLFKS  
YASNFSTIFDPKELPKDEYFMVEFFNFE

>gene\_886|GeneMark.hmm|615\_aa|+|20872|22719 >NVVL01000047.1 Rickettsiales  
bacterium isolate NORP64 Contig\_source1382A\_23569, whole genome shotgun sequence  
MPSIFKTEKHYHDVLIIGSGGSLAAGVFAANKNLDVAISKVHPLNSHTVAAQGGINAS  
LGNVTPDDWRWHMYDTLKASHWLADQDSVEEMCKGAGEVINMLDQLGVEFDRNKNKIDQ  
KIYGGHTTEFGQGGLAFRACYSKDKTGHSIMHKLQFHATEKQIAFYNYNFSLELIMQNER  
CCGVLCCLDMEKGILNVITAGNVIIASGGYSQIYATATSSAAGTGDGCGLVAGAGGALQDM  
EFVQFHPTALRAGVLITEAARSAGGKLLNGDGERFMKKYAPKFMELAPRDIVARAISTEI  
SQGRGCGAEKNHVFLDLTHLSREEIKENLPTIFENCSSFGGIDPSEEYIPIAPAAHYTMG  
GIATNSKCQVISCTETEKPIGLYAIGEAACISVHGAGRLGCNSLLDLLVFAKKAVESLE  
ELDNSGIGVDAGVSASNILTNFEQIFKGEIIDIDKMTRDLRNIMSMHVGFREKKGLQSA  
LVELMQLKEQYEQSALEYQPLQDKSSQDKSSQDESLODESLODKSSWDEFLQWNIELQHY  
LELGNMLISAIATTESALWRCESRGAWRQDFPETSDEFLGHTIFKPGQKENPSLRPIRK  
SVNNVGFDEPNERNY

>gene\_887|GeneMark.hmm|217\_aa|+|22787|23440 >NVVL01000047.1 Rickettsiales  
bacterium isolate NORP64 Contig\_source1382A\_23569, whole genome shotgun sequence  
MSKFKLLISLLSSPTIFAHIGTPLHLAHLNLLNYCTLTPETVNEYAPERFESTNNLLR  
KSGQRALYCGEKIIHGIVLDQNCAPVSDAKIHAWQVDCMGKYSYQPLKTRIDQKLININ  
PDSTFTGNGTAMTNNKGKHFVTTYPRAVHGRASHINIKIQHRMLGALETRTLTKGKRVR  
HPSKIPELDSISEIAEENNIPVVSFKIVLPGIGMNSY

>gene\_888|GeneMark.hmm|124\_aa|-|23494|23868 >NVVL01000047.1 Rickettsiales  
bacterium isolate NORP64 Contig\_source1382A\_23569, whole genome shotgun sequence

MSDSVNIKEVDEFIQRKRIYESRLAQQMHRQHAKMIDVTQQQLIKYEKGINRISLGRMLL  
IAKALRKDMSYFHEWFEPGEEVIVTKQQTTCEMSRNFMKIQSSEHQSAINSLIKSLLKA  
EQAA

>gene\_889|GeneMark.hmm|298\_aa|+|24156|25052 >NVVL0100047.1 Rickettsiales  
bacterium isolate NORP64 Contig\_source1382A\_23569, whole genome shotgun sequence  
MKPEDITIESYIDHYTTENGFTESAIGVRLFRDTPAARRPFTGSTCICFGIKGSVTCYY  
SGNQFHYSKGNMVMVSMPIEWEMFTDEGEVSYAIVIDIDFIILQQILGRMDKCKSTPP  
KEVIESNLRPAALNKDMKATLLRLLRCLDSPAKVKILAPGILKEIFYNVLCGSKSSNLNCN  
LANHNTPIRVAKALNYVNEHTNKPITVKMLAQEAGMSVSAFHTEFKKITAESPIQYVKK  
MRLNKAELLKQGGKISANTVAQYVGYKSASQFSREFKQLFGVSPMGRLNKS WLMEKNL

>gene\_890|GeneMark.hmm|296\_aa|+|25049|25939 >NVVL0100047.1 Rickettsiales  
bacterium isolate NORP64 Contig\_source1382A\_23569, whole genome shotgun sequence  
MKEGTLAYYVDRHIKENGIIIDSPKGVSMRSDKHIPRAFFSYNPCIRILAQGRKRGYFA  
GQEIQYNEGEYLTISLPVSIHETFGTKEKPVLGIIIDIDLMLNELIGKAKKDMIESDM  
AIKNPSNTSCAPARNLQPIALDKCMHCAVLRLLHSFESKEKTRVMGNHFIKEILYNALCG  
KDGAKLHDLVKYSQQAASIAKALNYVHEHINHRFSIEGLAHKANMSVSVFHRSFKEIMGD  
SPLNHIKKIRLTKARAMVKQEDLAINVVAKSIGYENPSQFSREYKQLFGISP KGER

>gene\_891|GeneMark.hmm|91\_aa|-|26274|26549 >NVVL0100047.1 Rickettsiales  
bacterium isolate NORP64 Contig\_source1382A\_23569, whole genome shotgun sequence  
VEVRLSKASGKYLKLGSSKFAKQIAIKIKVLSTGHQNDTKKLGKNSDYRVDIGEYRI  
IYQIEGPELYISLIGKRNDGEVYKLMERKQQ

>gene\_892|GeneMark.hmm|95\_aa|-|26554|26841 >NVVL0100047.1 Rickettsiales  
bacterium isolate NORP64 Contig\_source1382A\_23569, whole genome shotgun sequence  
MLLSLDNINGVRVMISMMSAKAAQSHFGEMLSLTIREPVAINRYGKRAAVVISNEEYEFKQ  
KLEDLYWTAKAEAAQDGFSSKESD DLLNSILTS

>gene\_893|GeneMark.hmm|960\_aa|+|27516|30398 >NVVL0100047.1 Rickettsiales  
bacterium isolate NORP64 Contig\_source1382A\_23569, whole genome shotgun sequence  
MGAIMHFNLDIAVISAFSLIIIVGVVAGFGVKTIKDYALGGRNFSTATLTATIAATWIS  
GNFFAIHTSGIYKDGIFYLVAGMGDVLIFITGLVISSKMNEFLGSCSVAEIMGKLF GSK  
VRLISAIASVLLSIGQLAIQVQILSMTLSHFLGLDAFLTITSSVIIIIGYSSFGGIRAVT  
FTDVIQCITFGVFVPVFAFIWQSLGDTTLIAATFNSNTLFDYTELVNTDNP KFWPFLFL  
FLFYSIPGLNPTMVQRMLMAKDSKQIKSSFLIAGVVSLVLYISVALISIVMFSHNPSLPL  
EGDNIIMHIIDNELPTWLKSVAIISIMAMVMSTADSWINASSVLF AHDICPALKIDKFDE  
LKVSRIFAISISAASVVIALSFNLLMLMLSATFYMPIVTAPLLVALFGFR TSGKVMMI  
AMGVAAGTVIFWKWQLQAITGVDSVMIGVIAHIALFAAHYLLGEDGGGTSPGTSPGAGS  
SFGKRKNTRRERA EKILQEMKDLNILSYCNKRLPESRMTYIYFSIAAFLTIISIFSIEKD  
LYNMHTALITSLQAI VFSIATAFLCKALWSDLIKEYLGIIWVYSIFTGLALISSFLVLL  
SKFSYVSLTILIMHLITISLLVGWRMSIIMIAACLWMSFSFYEGYIGEMVAGEIFDLK LK  
MIYLLLMTSGLAFTFLRSKQEQMEKSECKVETLETEVTTQGTKITTLNKKVGHYSERVSD  
QAREIERLGATAQKILNNVNHRLPVGVMNFAEMLRDGLEKYDKEHLKMLSEEYV NNS  
TRLSSMILNMLDLATLNAKKIELKKEKINFSKLVHERFENC RNIIYAQDKKALNFHLNIED  
NVLVFADINIRQMIDNLVINAINFSEQGTIAIIVNSEEYFVSFTIKDKGKGIPKTEIYD

IFTPFKMGSNTESKAEGRGVGLALCKAVMEAHGGKISAESRPIGALFRVCLPYGKLGKGGK

>gene\_894|GeneMark.hmm|1169\_aa|-|30494|34003 >NVVL01000047.1 Rickettsiales  
bacterium isolate NORP64 Contig\_source1382A\_23569, whole genome shotgun sequence  
MNRCLVLIITLFLVLTGCSGDSCIEADDFGHAVYKVSARYAKSEIGGQPKNQVAPWRDSGY  
KVNGRPLSITVKGWRYRYDRNNSDLSAWCAWYGSSGDSRKLAKICARLRDCHFIDEIMC  
TETVDAQIDNAPCLFRNGVGAYALIAKKDPNLTPQSQRSPKGLSFHLAKPVDRSYEVYDF  
IRENGKLLKRILGGRIYNYKQDANNYVNSTLYFKILDKFYDDNSGQYQIVVKSGIHRSN  
ADPISHGIGLVKEYLFGDKKGLIKGIYLGIVNNPEYRTAVSALLTLYVMFTGLSYLAGNI  
QITQMELVIRISKIAIVSALLSTEHSWNFFNDYLFVYFIGGVTQIIDMIMSAGATGPGSS  
SIMALMLAPQTISKLLSLLFVDWAGFIYIILFFIALAFIMMVFFQA AVIYVTAIVAIGMI  
ITMAPIFICFMLFGATRNLFDNWLKQLTSYAIQPIILFTGLALISMILRQEIYGLGFRV  
CKKDFPKMTNADDTPVFGHESEEILGFTMKHSIFYWWFPDPMKGGFEKETS LIPIPLDN  
FSKSRDGMRRDRERNPESGFCEAYGCDERYPDLPLFDVVKDRDRINAFQKGSFVQLDNLF  
IIFIAIYLLHKFNRLSISVARFISDTSGNYAELESVEAGVRQDIKQHGPGLVTRAADITI  
GKANRQKITALRDMQAQAKIRSAGKKIYTKASAFVDKRRIRGLEQEAISSSPNKAVLSEIR  
KKSGLDSLKIKIGSLKQYARLANELRNMDSNLTAKQVSKLASQMSGKKYSALKNEFAQA  
KYGMQYSALPENAKQQINTLHKDRALRDLAREAENVRMFQTEYIEAYARLSDKGIGLVGK  
KSRLIRSEIEIRHDAKERKKHKQNKQQQIGREIIEIEGKHSAYSKLSGGREDALSLGV  
AGGAWHEINTDPKADNHRLQTQAEIADQRLSTEREATARIIEDLSARHGTNVISPEFLA  
EAERNGAADLEKYQNLEREDLNNRHLALTAKTDDGPVLMGEKYMQEYASDEQMKEIIDR  
IHETEEVFAQYDQFLSRATYEDNLQFAEENLQENYAMKLDHYDRDNITAEEMPALLRSY  
YDEADDISPEDAYSKIVQLEESISEFSSSQETLQQIDHRREELAEETDQHIENVNKHRTD  
AGMEEYTPEARVELPVRRLRKIDDHLRNL

>gene\_895|GeneMark.hmm|1136\_aa|-|33996|37406 >NVVL01000047.1 Rickettsiales  
bacterium isolate NORP64 Contig\_source1382A\_23569, whole genome shotgun sequence  
MRTIQLLLITICLAVHVDAYSGDGSRYDWMNRDLSDRGWGCIEPPHFTSTKGGKTTTLNL  
DNKGVVWSSGISVEKDKLLKVNWSAGEVQRPEKYTVLYRIDPRFAKPQIFIQRYDYKQQ  
KYISNFHKAGLLKYQDSRTLNNNYTKRFADFNKFFNSQSITIKKNDVINVTLIGSGEYFS  
NDSQMRTLGYENEPLVIRTNSALTDNRMIYSNASPWCMAIGEDSSQYTDLCLKYPGYT  
DSAENIETLVGGIQNPSFARNLISIGKCPGSANGRNNTLCYYDNGRGMQFKLAGKTIKNT  
PEKFAVSSSSSKDFFYYKSDVNGKLEFVTQWDIAGMYNEMYTQNGKPVAKNWSWQFMTQW  
PSFGNRSNFNSKLVDIRQNLNMFHFGRYFMRVEVGNSTASVSEADLNSINIEYTIMKN  
GAPGSSAKGTSIGRFGSGNASKTGLSVWRVAGKNDNVTGVLHARTTSYTGSTWFSEKIYG  
KLIKPLREKFARLTKTMYSKLVTDKNLQNIAMLMVIYISYIYIMFLGGSVKITIKDIVT  
RIVKISLVVTLFSSSSWEFFNSYLFDALVSGSDYLMSSVIESTSQSGNVFGFIDPIFDK  
YTDGSLWALLFIQLLQIHNGMTFFAIMTIYSILTYFRALIEVIVTYCLAFLGLAVLSIA  
PLFIILIFERTKSMFDNYISTMFSYMIQPTILLIFFLMIDQIMSTHIAN TVVRSCWSTL  
IEIKLGLDLRHMGIPLSFSIGLPLPNISFYVPQVTPIKTVSDFIIGTISKVATSSLIF  
FALAKLSSGLVNYVLLIVQFLTNVLAARREGILQETKNPVTDIMKDMERIIIPARFVARN  
VRGFAKEKLIDQKIDS NIRHRRGGDIDIDYSGMQKSNPDDPQNDSPDNNGGGGGGGDGDN  
AGGSGGSRGSGGGRRSGGGSGGSSGSDGGSSSGNDGDGGGSGGNSSARSASTSRPSSGG  
YDEHREYDESEFHASVEMTEFKSSTPAEPDDSKAASVSDDAPENARSRPGSDGALDNAPN  
DTPDDAPENSRAASAPEDAPENSTDSAPGDASENSPENPSGQVERRDSEALHSPEESKAP  
PSARDDAERRDVNESIEMTELAKKRAPNDGSRGDGSRGDGSRGDGSGQQGGDNSNE



>gene\_896|GeneMark.hmm|153\_aa|-|37637|38098 >NVVL01000047.1 Rickettsiales bacterium isolate NORP64 Contig\_source1382A\_23569, whole genome shotgun sequence  
MITIDHKTQAMASASKLKKGAKSDKNRKTAFAPSKQTHEASSNESFAGVADVGGMLFLQE  
FDQYAQDKQNLEEFGNKALKTLKELQLEILSGRINGAQLHSLKKEMDSNKFIISTPELAI  
LADEIKIRIEVEIAKIEVNRSADIASKNLRPQI

>gene\_897|GeneMark.hmm|449\_aa|+|38226|39575 >NVVL01000047.1 Rickettsiales bacterium isolate NORP64 Contig\_source1382A\_23569, whole genome shotgun sequence  
MFQTLTQNLTKIFDKMKGTGALSEAQIDSAMRDIRVALLEADVALPVVREFIDAVKKQAK  
GQKVVKSVSPGQMVVKIINDEMVRLLSPNESESELNLSDAPPVNILIVGLQSGSKTTASA  
KLALKLKNQNKVLLVSLDTPAAQDQLEVLSRDIGADCLEIVKGQMPLEITKRAVKES  
RLGGYDVVIYDSAGRLHIDEEMIEEVASVKKIINPTETLLVIDSMIGQDAVRVASAFEK  
LKITGVILSRIDGDSRGAALSVRHVTGKPIKFLSTGEKPTDFEEDAKRITSRILGMGD  
VVSLVEKAAGLVDQEDAEMAAKIKKGRFDLNDYISQIKMIKKMGGFGSMLSMIPGMSKF  
SNKLGADGDGDKLLSYQEAIVSSMTKKEKRNPDLMNASRKKRVASGSGISVQQINTMLKQ  
FKQISTMMKKASKMDPKSLMRGDMGKLF5

>gene\_898|GeneMark.hmm|69\_aa|+|39642|39851 >NVVL01000047.1 Rickettsiales bacterium isolate NORP64 Contig\_source1382A\_23569, whole genome shotgun sequence  
MGKAKIASKNNPEGRGRAKEYFHNGKKIKPVKMISLSQSFFAAEYDDSGEMVLDAAGKVL  
PWGKAKYLG

>gene\_899|GeneMark.hmm|418\_aa|+|40219|41475 >NVVL01000047.1 Rickettsiales bacterium isolate NORP64 Contig\_source1382A\_23569, whole genome shotgun sequence  
MIHHSEAFTIDYSNFSLNTALYPRLVAAVASIVPKILESIEDGTPAYKIFSIEHARQAE  
SCAHYAETIKANFSDLIVIGMGGAVLNPRTAISLTFVPSSVKIHFLDNTDPFFLQKLLA  
QIDLKNCVLAISNSGQTLETALTGVMINKFEQAGVRLSDRFFFITNKQSGRLRDVANK  
IDATIIHTSNISGRYSTLTNVTSLIAQIAGVNMKEYLAGAEMVMKDFDKKENTPAALS  
VSIMLNEPKSTLVNIGYLQQFDVLEWYSQIIAESLGKEGKGVTPIRGLGPNDQHSMLQL  
YLDGWKDKIYSLFYVENWKNVQTHKACDLAALGGIAGRELQEINTANFSATRAALLTRKL  
PVRTITLKDLSARSIGALVTHSMLEIVIWSRVMHINPFNQPGIELIKTESTKIIDSKK

>gene\_900|GeneMark.hmm|40\_aa|+|41866|41985 >NVVL01000047.1 Rickettsiales bacterium isolate NORP64 Contig\_source1382A\_23569, whole genome shotgun sequence  
LRDITKKIKFIQMF EKPLISFDYAIKFLKNKEGYEIKEG

>gene\_901|GeneMark.hmm|46\_aa|+|1|141 >NVVL01000048.1 Rickettsiales bacterium isolate NORP64 Contig\_source1382A\_23573, whole genome shotgun sequence  
YLAMINIITIALPETGSFFKYIVHSFFMGFMNLDNFNYSYYASHIAS

>gene\_902|GeneMark.hmm|251\_aa|-|146|901 >NVVL01000048.1 Rickettsiales bacterium isolate NORP64 Contig\_source1382A\_23573, whole genome shotgun sequence  
MLEHFTLEFVHFMLVFARLGTAFRMFPGIGSPYLFERGLAVALSISFVMMPVLTYPYLP  
PYTDNSALNLGYLVMELIGLVISIAANLYFQSLHFVGGQILSMQSGLSAAFFDPLQKTQ  
VAIFSNFMLLIAIVFIFTTNTHYLFIEAVADSYIKFPVGELLDSDGVDVSKFVWLVVND5FI  
LSFKLVSPFLVIGLAILTGSGLLARLMPNLQVFFVITPAQIIIMMGTMVLIHSIIKLV

GKIGASLSMSF

>gene\_903|GeneMark.hmm|216\_aa|+|1143|1793 >NVVL01000048.1 Rickettsiales  
bacterium isolate NORP64 Contig\_source1382A\_23573, whole genome shotgun sequence  
MDDLAAMMPQLYFIVQGIGVTLKYSMSAVCIGLIIGTLLAICKMSDSKSLRLFAHAYTSI  
FRGTPLLIQLTIYFGLPGLLGKMSVFTAGTLAFSMNSGAYVSEIIRAGINSVDKQGTE  
AAKALGIPPVLRMKDILPQAIRNILPALVNELINLVKESALISVIGGEDIMRRAQLISA  
ETYSFFTPMLTAAATYYVLVLVISSFAMMLEKRLAL

>gene\_904|GeneMark.hmm|240\_aa|+|1790|2512 >NVVL01000048.1 Rickettsiales  
bacterium isolate NORP64 Contig\_source1382A\_23573, whole genome shotgun sequence  
MIVLENVTKKFNDQTALKDINLTFDKKEAVVVLGSSGSGKSTLIRCINNLETPTSGSVFI  
NGTQLTSKTRGKLCFKIGMVFQQFNLFPHMSVLQNLTYGAINVLGNTQHIIEEKAYKLLK  
KFGITEKANSSPLDLSGGQQRVAICRALMMDPETILFDEPTSALDPEIIKDIIGIINEL  
KGQITMIIISHHIKFARVIADRIIFMDQGGKILADQPAKEFFTKPSSHRARLFLENVGDLM

>gene\_905|GeneMark.hmm|128\_aa|-|2592|2978 >NVVL01000048.1 Rickettsiales  
bacterium isolate NORP64 Contig\_source1382A\_23573, whole genome shotgun sequence  
MNRVILDASALLALINNEKGAEKVEPLIGRAVMSSVNVTEVAGKVVEILGNEEQCKLAIE  
PFISSIIAFDKVQCYAASLKSQTKHKGLSLGDCACLAALHMGLPVYTADKVWAELNIP  
NIEIHLIR

>gene\_906|GeneMark.hmm|81\_aa|-|2971|3216 >NVVL01000048.1 Rickettsiales  
bacterium isolate NORP64 Contig\_source1382A\_23573, whole genome shotgun sequence  
MFAKAKISKGGKISIPSICRKALNVSDGDELLFDISDNQVVISPVKFTLQKIRKLLKDRN  
PSKTSLVDELLQERKQELKNE

>gene\_907|GeneMark.hmm|135\_aa|-|3343|3750 >NVVL01000048.1 Rickettsiales  
bacterium isolate NORP64 Contig\_source1382A\_23573, whole genome shotgun sequence  
MKAFEKYKNAQAYTSNSSHQLIFIFDELLKLLFTAQKALKEEDYETKFKALAKAIEVFYI  
LKSGVEIDNPDESTKAIDMFYGATIVRLENINMTISSPPEDLVLMMIDSIGEVQRQALAQSI  
APEKEEKESYITSN

>gene\_908|GeneMark.hmm|606\_aa|-|3819|5639 >NVVL01000048.1 Rickettsiales  
bacterium isolate NORP64 Contig\_source1382A\_23573, whole genome shotgun sequence  
MDISKGVSITGMLGPVDEFVAKATSQQELVLEDFNDQVSVRHDKLGAISELQMLLTDLKA  
KATRLSDPMETGFNHHKHCSTTINGESADKFLKNVRVDGTVSNGHVHVAVEQVASGASLTI  
AFNAQHTGFTNDANPIGLDGDLTLTIGGNARIINVAADNLGIIVSNINLNFENNGDAFE  
AFLINGNPGGVPSSFIEIRAKNTGFEQIGIAWADIGNPAMTMLEHAHLDGQDAIVYVEGV  
RYDNASNKYDNAIAGLSFELAGAVNVAAAVPNLAYNGFDYSAICTEEDHDPVKKMIIIEFA  
NSLDMLTYFVAKHGADSDVSTIDKYADPYADKSKDDQGGVLRGSMMLLVEATQIVERFTGL  
QHNGNGITSIAQMGMGLKTTVQDGISFETLYFSDEDLFVKKFEDDFESVRRFFINHVQVT  
PTPGNLSSLQYIPTDMPGEVITPSIIGRDLPVSIYDPAGAVTAFSVTADGQVVNGAITY  
NASLNRYISIFAGTALKGMAFSVDPKAANNVVENFTINYTRGISNLVRDEARTMLSDDGS  
GGSTIAEAGRIQDRIKSLETSRDKIQAKLEKLKGMQADYKRMILLETKSAIALSQADAL  
LGLNDG

>gene\_909|GeneMark.hmm|154\_aa|-|5876|6340 >NVVL01000048.1 Rickettsiales  
bacterium isolate NORP64 Contig\_source1382A\_23573, whole genome shotgun sequence  
MSLTHRKVCIDDLKIIVDLLSTDKLGKTREQISEELDGRYIDAFHKIDNDPNQYLMALCE  
GKKIVGTSHCTLMPSLTFTGSTRMQIEAVRVCQSARGKNIGQQMIEFAIGWGKNHGATIF  
QLSTNKERVDAIRFYEKLGFNATHEGMKLYLEQE

>gene\_910|GeneMark.hmm|165\_aa|-|6337|6834 >NVVL01000048.1 Rickettsiales  
bacterium isolate NORP64 Contig\_source1382A\_23573, whole genome shotgun sequence  
MYAGLKYQEFVRKMSNEIHTLARAVILDDEHILLCKTLDPVNFYFLPGGHVEHGESASQ  
ALMRELKEETGKDCTVKRFLGCLSEYFEPGHNSICHNHEYNFIFEAESDQLKVREKISSP  
EKHIELIWWAVSDLSEIDFRADPLKLLPEWLSRDAHNVFRSEMI

>gene\_911|GeneMark.hmm|356\_aa|-|6897|7967 >NVVL01000048.1 Rickettsiales  
bacterium isolate NORP64 Contig\_source1382A\_23573, whole genome shotgun sequence  
MQAVIIAGGKGSRLWPASYKNHPKPFVRMNDGLSLIQKTLRAGCVSLVRSIIIVTRHDY  
VPRIKAEYEEIAHLMPKGVDLSFIEEPFGKNTAASIAAAALSLSAKNSEDEAMLVLPIDH  
IADQEGFNAAVSKAAEIAKNGQENSAGKGLVTFGIKPTHAESGYGYIEFSGNEVLGFT  
EKPSKETAEKYIKHGNFYWNSGMFCFTARTILQEMHDHCPVSLSTVRRALSTSKRNVNGD  
ISLDVSSFSLVSEVSIDYALMEKSSNISVIPCDIGWRDVGWTFEWFHSHQTQADAKGNRLRG  
DVITHNASNCYVDSNGITIGVVGLNDVAIIHTERGLLVINKNSSEDASAIYDKTET

>gene\_912|GeneMark.hmm|358\_aa|-|8370|9446 >NVVL01000048.1 Rickettsiales  
bacterium isolate NORP64 Contig\_source1382A\_23573, whole genome shotgun sequence  
MKQRITKLGTLGTQYFRSFTGSNLRFKAAAGFSVTPYSGVNSRDSSNSINNWGHTTQWKEF  
HTDSQILSGKTDPFNSQKTNSSSLATQQPAIDQTPKKPAADLSTVPDAQEQGRSNGGGGE  
PYNWEPWLGLTALALGIFNVWQALKNRAESREYEEKLSKEKAREQLKSDLKELSKKCSNN  
TIEDWPLSIENLLDFIKKNYSLDPSTLAKLLSDYDVDRLAYIIASYCNSGHPDRVEAREK  
LEFARKLIASKCNCTLDEVKVPDLFRHHCFSELYIELTGMLSKTYIYPDNTESDIKHSIF  
YVKKAYSQAQQHYKMTNEPKFWDKLLSEQNFQLLTIHGDQFVDNPTFLAGDDAVPNDS

>gene\_913|GeneMark.hmm|159\_aa|+|10089|10568 >NVVL01000048.1 Rickettsiales  
bacterium isolate NORP64 Contig\_source1382A\_23573, whole genome shotgun sequence  
MTKD TAKASENINVKLVEGLLSKTDPELFGKGGMFAQLKKQIVEKIPPSEMEHELGYSK  
HSKISKLNRRNGSYEKTILDDEGYKLAAEIPRDLGAYEPKLPKGVRRFSGFDDKVI  
SLYSRGMTMSEIQGHLEEIYSTEVSKELISTVTDSAIEE

>gene\_914|GeneMark.hmm|109\_aa|+|10599|10928 >NVVL01000048.1 Rickettsiales  
bacterium isolate NORP64 Contig\_source1382A\_23573, whole genome shotgun sequence  
VYPILYLDCIHVKARDNHTIINKAVYLAIGVNMEGRKELGIWVGKNEGSKFWMQVVTTEL  
KNRGVQKIYVASVDGLKGFPEAINSIFPDTIVQLCIVHMVRNCCEICVL

>gene\_915|GeneMark.hmm|104\_aa|-|11009|11323 >NVVL01000048.1 Rickettsiales  
bacterium isolate NORP64 Contig\_source1382A\_23573, whole genome shotgun sequence  
LFKIAANKFELVQCHGPISDRHCPFFCSVSKCKKYYLFDRVIVWKYPLVFDDFSDLTIDR  
FNCIRRINLPDFSRKCKKWDYTSPIPFYPARDYVWFVFAIPLIK

>gene\_916|GeneMark.hmm|154\_aa|-|11403|11867 >NVVL01000048.1 Rickettsiales bacterium isolate NORP64 Contig\_source1382A\_23573, whole genome shotgun sequence  
MANHSATKKAIRKTVSKTEINKTRKSRIKTYIKRVITAVEAGSSEESNKALVEAQSEIMR  
GVANNLMKKNTAARKVSRLSKKVKAISTGAAVGTAKTTEQKATKPKTVSPEKATAEAGAT  
GTKAKPAAVKKPATTKAKPAVKKEAEKKSDTASK

>gene\_917|GeneMark.hmm|137\_aa|-|11880|12293 >NVVL01000048.1 Rickettsiales bacterium isolate NORP64 Contig\_source1382A\_23573, whole genome shotgun sequence  
MRHKIKGKKNLRTSSHKAMFANMATSVMNEQIKTTVPKAKALRPYIEALVTKARAATL  
SARRDIISRIKDKKAAEKLMVLAERYKERPGGYTRIIKAGFRYGDKAPIAYIEFVDRDL  
SAKGCMTPKVEETENQE

>gene\_918|GeneMark.hmm|339\_aa|-|12449|13468 >NVVL01000048.1 Rickettsiales bacterium isolate NORP64 Contig\_source1382A\_23573, whole genome shotgun sequence  
MLSLNKNWSSLIKPSKISYDGKEEKS NVANIIIEPLERGFGLTIGNALRRILLSSLQGAA  
ITAVKINGAVHEFSAKSGVKEDIVDVVNLNKKISIKQHSTDRKTLRINVKGPCVVTAGMI  
ETGTDVEVLNPNQKICTLSKDAELEMELYTEIGRGIYIPAGSAKDHFPLGVITIDALFSP  
VKRVAYKVEDTRVGQVTDYDKLLMSIETDGTISPMAVALAARIMQDQLQLFITFEETEE  
EKLESKEELEYNPILLKKVDELELSVRSRNCLQNDNIVYIGDLVNKTEAEMLRQTQNFGRK  
SLNEIKDVLQKFNLKFGMEVSDWPPENIEEIAKKYEEPY

>gene\_919|GeneMark.hmm|127\_aa|-|13487|13870 >NVVL01000048.1 Rickettsiales bacterium isolate NORP64 Contig\_source1382A\_23573, whole genome shotgun sequence  
MTPINKVRKKKNITLGIVHIKATFNNTIVTVTDVQGNVIAISTAGAHGFKGAKKATPYA  
AQITVDKVVSEMAKEHGLKTVSIKVKGAGSQREAAMRAVFSQNFVVISITDVSGVAHNGVR  
APKRRRV

>gene\_920|GeneMark.hmm|122\_aa|-|13887|14255 >NVVL01000048.1 Rickettsiales bacterium isolate NORP64 Contig\_source1382A\_23573, whole genome shotgun sequence  
VARIAGVNIPPNKRLVISLTYIHGIGLTSSQKICRSTKISESRRVKDLDDKELVALRAEI  
DQNFQVEGDRRREVSLNIKKKDIRTYEGLRHRRPLPVRGQNTHSNARTRKKGKAVAIAIGK  
KK

>gene\_921|GeneMark.hmm|215\_aa|-|14316|14963 >NVVL01000048.1 Rickettsiales bacterium isolate NORP64 Contig\_source1382A\_23573, whole genome shotgun sequence  
MTKKIIVLLGLPGSGKGTQGALLSEELVIPHISTGDVFRKMVLEDSKTLAACMKEGR  
LVPTGLVNKTIRKYILSDECRDGCILDGYPRTLDQAEYFIENIDATVNVIFFDLESDVVV  
KRILGRISCSSCGRIYNEHFDKPKKKGVCDNCGSEEFARSDDTESAILSRIAIEYEKETL  
PMVEYYQKKGRFFTVNAGKSKQKVVEEIASIVKKI

>gene\_922|GeneMark.hmm|428\_aa|-|14964|16250 >NVVL01000048.1 Rickettsiales bacterium isolate NORP64 Contig\_source1382A\_23573, whole genome shotgun sequence  
MQKSKGELSSRIFLTVSLLVCRIGSFIPIPGIDSIALASLAERSQGGILGMFNMLSGGS  
LERSIFALAIMPYITASIVIQLMTIAYKPLENLKKGDEVGRRKINQLSRYLTVVFAFQ  
AYGIAIGLGATVTPYGPVVIDPFFFKVSAVTTLVVGTMFLMWLGEQISARGIGNGTSLI  
IFIGIVSGLPSAVIGMFELSRKGAMSPVAVMAICAGVLAMITVIIYFERAQRKVLIQPK  
RQVGNKIYGGDATHMPLKLNKTSVGPVPIFASSVLLFPATISEFSSKDSEIMGMVSRYLGH

GKPLFIFLYIALIMFFSFFYTAVVFNSEETAENLRKNGAYVPGRRPGKNTAEYFDYLLTR  
LTVLGSLSLVVVCIVPELLMNKYSVAFALGGTSFLIVVNVVLDTFQAQIQTHLFSARYEGL  
VKKMKLRN

>gene\_923|GeneMark.hmm|149\_aa|-|16264|16713 >NVVL01000048.1 Rickettsiales  
bacterium isolate NORP64 Contig\_source1382A\_23573, whole genome shotgun sequence  
MRLNTLFNVESKKPRKRVRGIGSGTGKTCGRGVKQKSRSGVAIKTEGGQMPLIKRMP  
KRGFSCSKAVNYTAISIADIEVMIEEKRIDAKGSVNKELLVSIGYIKSDKVPVKLLGGLE  
KASHKLTIELDACSASAKAVVEAAGGKVL

>gene\_924|GeneMark.hmm|69\_aa|-|16730|16939 >NVVL01000048.1 Rickettsiales  
bacterium isolate NORP64 Contig\_source1382A\_23573, whole genome shotgun sequence  
MTEKKIKSKSLIKVTQIGSPIGRSSDQRKTLIGLGLNKLKRSRLLEDTPSVRGMMAEKV  
GHLLSVETV

>gene\_925|GeneMark.hmm|172\_aa|-|16974|17492 >NVVL01000048.1 Rickettsiales  
bacterium isolate NORP64 Contig\_source1382A\_23573, whole genome shotgun sequence  
MSKYTRSNDIIEDLVHVNRTKVVKGGRNFSFAAIVIVGDEKKGKVGNGKAKEVTEAR  
AKANKDARKNMISVPLYKGRTHHDVIGVSGAAKVVLRRAPGTGVIAGGPLRSIFGRLG  
LEDIVAKSLGSSNPQAMISATFNALKSLNSPKSIKRRGKNIAELSVNAASA

>gene\_926|GeneMark.hmm|118\_aa|-|17505|17861 >NVVL01000048.1 Rickettsiales  
bacterium isolate NORP64 Contig\_source1382A\_23573, whole genome shotgun sequence  
MSAKNHSFKRRKERVRVKLKVSDRNRLSVFKSGRHIYAQIIDDSTSRTLVSASTLDKEI  
RVTAKSNCNVEFAVKVGKLLADRAAEKSINLVAFDKGGHKYHGVVKALADEARKKLQF

>gene\_927|GeneMark.hmm|177\_aa|-|17868|18401 >NVVL01000048.1 Rickettsiales  
bacterium isolate NORP64 Contig\_source1382A\_23573, whole genome shotgun sequence  
MSRVGKLPVSIPEGVKVDIKGLNIQIQQAGALERTFAGQISIEQKDGVVIVKPLDDTTP  
ARAMWGTARSIINGMMKGVTVGFQEELEVIGVGYRAAVKGYLNLTGKSHNTKIEIPDF  
IKVSTPKQTIIMLESCDKEKLGQYVAVVRSQRPPPEPYKGGKIRRKGEYVQRKEGKKG

>gene\_928|GeneMark.hmm|130\_aa|-|18414|18806 >NVVL01000048.1 Rickettsiales  
bacterium isolate NORP64 Contig\_source1382A\_23573, whole genome shotgun sequence  
MSMSDNIADMLTRIRNGQKSKLLNVGLPLSNLKCAVLDVLEKEGYISGYTKDAESKTIDI  
SLKYSRVGEGAICEIHRVSKPGKRMYSIGDLPGYFNNMGIHILSTSHGVMSDREAKKLN  
VGGEVICKVF

>gene\_929|GeneMark.hmm|101\_aa|-|18834|19139 >NVVL01000048.1 Rickettsiales  
bacterium isolate NORP64 Contig\_source1382A\_23573, whole genome shotgun sequence  
MARTGSIETNNKRRLAGSFKAKRDALSAAKIKQKDLPLEERFELVMKLAKLPRNSAQIRV  
RNRCALDGRPRGFCRKMGISRNKRELAAGLLPGIVKASW

>gene\_930|GeneMark.hmm|180\_aa|-|19166|19708 >NVVL01000048.1 Rickettsiales  
bacterium isolate NORP64 Contig\_source1382A\_23573, whole genome shotgun sequence  
MLLRFKELYSKNIVKDLQEKFKYPNIHQMPKLTIVVNMGVSDAVSDSKVINHAISDMTA  
ITGQKPETYAKQSIATFKLREGMKIGCKVTLRRARMFEFLERLVLIAPRVKEFKGLSV

KSFDGRGNITFGIKEQIVFPEINYDKIDKIRGMDITIVTTAKTDEEAKALLSGFQIPFYN

>gene\_931|GeneMark.hmm|109\_aa|-|19708|20037 >NVVL01000048.1 Rickettsiales bacterium isolate NORP64 Contig\_source1382A\_23573, whole genome shotgun sequence  
MHKLIKKGDTVQVTTGKNKGKVGDVTKIFPSDNKAIVAGVNLVKKHTKPSQTSEGGIIQ  
KELPIHISNLSHIDPKTKEITKIGYKTLSDGKKVRFKKSSEIISKEGK

>gene\_932|GeneMark.hmm|122\_aa|-|20039|20407 >NVVL01000048.1 Rickettsiales bacterium isolate NORP64 Contig\_source1382A\_23573, whole genome shotgun sequence  
MIQMQSILTVADNSGAKKVMCIKVLGGSGHMVAGCSDVIVVSIKTAIPGGKVKKGEVHRA  
LIVRTKKGVRRPDGSLIQFDSNSVVLVKNQNEPIGSRVFGAVPRELRGKGFMKIISLAE  
VI

>gene\_933|GeneMark.hmm|76\_aa|-|20480|20710 >NVVL01000048.1 Rickettsiales bacterium isolate NORP64 Contig\_source1382A\_23573, whole genome shotgun sequence  
MPKRILQGTVVSAKSEKTVSVEVERRFRHPLYKKTVRKSTKYAVHDENSRCSEGDKVKIQ  
ECRPLSKTKSWVIVEE

>gene\_934|GeneMark.hmm|74\_aa|-|20703|20927 >NVVL01000048.1 Rickettsiales bacterium isolate NORP64 Contig\_source1382A\_23573, whole genome shotgun sequence  
MSKSEFTSKVLSQVTLEKLVEKLVFLKKELFNLRFQKTLGELTNTSRFLKVKKDIARVGT  
ELTRRRKTGAKADA

>gene\_935|GeneMark.hmm|136\_aa|-|20920|21330 >NVVL01000048.1 Rickettsiales bacterium isolate NORP64 Contig\_source1382A\_23573, whole genome shotgun sequence  
MLAPKKQKFRKAHKGRVASKSKAGTMLNFGSFLKSLDGLRVATARQIEARRAAVRHMKR  
QGRFFIRIFPDLVSKKPNEVRMGKKGGAPEYFAVRVSPGRIMFEIEGVDEVVARQALDL  
ASAKLPVRTKMVQRYE

>gene\_936|GeneMark.hmm|217\_aa|-|21345|21998 >NVVL01000048.1 Rickettsiales bacterium isolate NORP64 Contig\_source1382A\_23573, whole genome shotgun sequence  
MGQKVNPHGFRVGPFLFKDWDSVIFYAERKDYSEKLIQDLKIRALIMKRYKIANVSSVVIK  
RHSNNVVINISAKKPGIIIGKSGSDIEQLKKDIQKISSTEVFINIHEIKKSGIDAMVIAQ  
TIAQQLEKRSSFRCMKTAIQNCFKQGGKGIKVAACSGRLGGAEIARTEWYREGRVPLHTL  
RANIDYGTTEEANTTYGVIGIKVWVYKGDFAQKKDKVN

>gene\_937|GeneMark.hmm|116\_aa|-|22000|22350 >NVVL01000048.1 Rickettsiales bacterium isolate NORP64 Contig\_source1382A\_23573, whole genome shotgun sequence  
MSDLLAKASIRRLRTSPQKLNLAAMIRNMKASEALAQAFSPKRIAVDVRKCLQSAVAN  
AENNIGLDIDNLVVTSATVGRSLVMKRIRARARGRSARIMKPFNSLYITVSEREES

>gene\_938|GeneMark.hmm|92\_aa|-|22367|22645 >NVVL01000048.1 Rickettsiales bacterium isolate NORP64 Contig\_source1382A\_23573, whole genome shotgun sequence  
MTRSVWKGPFVDGYLLKKVQKAMDSEGRKEIITWSRRSTILPMFVGYTFVHNGNKFIPV  
AVSEEMVGHKLGAFAPTRTFYGHGADKKAKRK

>gene\_939|GeneMark.hmm|274\_aa|-|22660|23484 >NVVL01000048.1 Rickettsiales bacterium isolate NORP64 Contig\_source1382A\_23573, whole genome shotgun sequence  
MALKKYNPTTSPQRGLVRVDRSELWKGAPHKPLTKGLSKSGGRNNLGRITSRHRGGGHKR  
LYRMVDFKRCKLDSVATVERIEYDPNRTAYIAFIKYEEDTVSYILAPAKLVAGDKIISSA  
DADIKIGNCLPLANIPVGTIVHNVEMKPGKGGQIARSAGTSVSIVGKDSGYAQIKLASSE  
VRLVPLECRATIGTLSNAEKKNTIVGKAGRSRWMGKRPHVRGVAMNPVDHPHGGGEGKTS  
GGRHPVTPWGKPTKGKKTRKNKLTSKFILKRRTK

>gene\_940|GeneMark.hmm|98\_aa|-|23486|23782 >NVVL01000048.1 Rickettsiales bacterium isolate NORP64 Contig\_source1382A\_23573, whole genome shotgun sequence  
MKADKKYDLIRRIITEKSTIAGEQKGYVFEIAANADKPSVKRSIEAIFEVKKVSVNILN  
QNGKVKRFKGTMGRRSDVKKAVTLEKDHTIDLAGGMK

>gene\_941|GeneMark.hmm|206\_aa|-|23782|24402 >NVVL01000048.1 Rickettsiales bacterium isolate NORP64 Contig\_source1382A\_23573, whole genome shotgun sequence  
MKAELVSFEKKVVGEVSLDSSIFGLEARVDIVKRVIDWQRAKARAGTHSVKTVGEVSGTT  
RKPFKQKGTGNARQGNARGVQRRGGGIAHGPOVRSHTKLQKKVRRLGMRHALSIKFSEG  
AVHFVDSVDMTKPKTSELVKTLSNFGKGRFFVIDGADLNANLKSVASVENASAVPAIGA  
NVYDIIRSDHILISKNALSLLEERLK

>gene\_942|GeneMark.hmm|214\_aa|-|24436|25080 >NVVL01000048.1 Rickettsiales bacterium isolate NORP64 Contig\_source1382A\_23573, whole genome shotgun sequence  
MRTGLITKKLGMSSMFTDQGERITLTLFKLEDCLVVGQKTMDRDGYNALVLGAILRKVSR  
VSKPMKAIFANAKIEPRAKLKEFRVSDSNMLAIGSELKPSHYEIGQYVDVSSRSIGKGF  
GVMKRHNFAGLEATHGVSISHRSHGSTGCCQDPGKVFKGKMMAGHMGDKNITIQNLQVVE  
IDDVNGVIVVSGNVPGSKGGYVFIKDAVKKSVAA

>gene\_943|GeneMark.hmm|105\_aa|-|25082|25399 >NVVL01000048.1 Rickettsiales bacterium isolate NORP64 Contig\_source1382A\_23573, whole genome shotgun sequence  
MNNQKIKIKLKSFDHRSLEHATSEIVSAVKRTGADISGPIPLPRRIERTVIRGPHVDKK  
SREQFEIRTQKRLVIINYPTPQTVEALRKIDLPAGVDVEIKLVGA

>gene\_944|GeneMark.hmm|394\_aa|-|25511|26695 >NVVL01000048.1 Rickettsiales bacterium isolate NORP64 Contig\_source1382A\_23573, whole genome shotgun sequence  
MAKEKFDRSKPHVNIPTIGHVDHGKTSLTAAITKVLASKGKINKQVKYDEIDGAPEERE  
RGITISTAHVEYETEGRHVYAHVDCPGHADYVKNMITGAAQMDGAILVVSAAADGPMPTRE  
HILLAKQVGHMVFVFLNKVDQVDDEELLELVEMEVRELLSAYKFPGDDIPIIRGSALRV  
LEDKETECIDKLMEAVDSYIPTPKRETDKPFLMPIEDVFSISGRGTVVGTGRIEQGIVNIN  
DELEIVGIKDTEKTTCTGVEMFRKLLDSGEAGDNVGVLLRGTREDVVRGQVLAKPGSIT  
PHTEFEAEIYVLTKDEGGRHTPFFKNYRPQFYFRRTDVTGEVELPAGKEMIMPGDNTKIV  
VKMISPVAMEAGLRFAIREGGRTVGAGVVSKVIK

>gene\_945|GeneMark.hmm|252\_aa|+|27190|27948 >NVVL01000048.1 Rickettsiales bacterium isolate NORP64 Contig\_source1382A\_23573, whole genome shotgun sequence  
MKNNKKGIGNSANNRKASSLNKGQYYMYGKHGVLAALKNENRTVRSVYCLEKQARELKNEL  
HGTHVEIVQNNFITEKIGKDQAHQGIALLVSSIFKNNIEELTFPGKDRIVILDQLSDPQ  
NIGAIIRSAAAFGINKLILPSDNAPEESASIAKAACGCLELMQIAKVTNIKNSIDKLLKMM

GFWIAGLDGQGKENMNDVMEIEKLAIIIGSEGKGMRRRLTSETCDFLVKIPSEQVESLNA  
SNAASIIFYLLR

>gene\_946|GeneMark.hmm|237\_aa|+|28108|28821 >NVVL01000048.1 Rickettsiales  
bacterium isolate NORP64 Contig\_source1382A\_23573, whole genome shotgun sequence  
MIGNLLNKFKKQPELGALDAQNNQAPAGNAKNWYDERYDTIIVQRNIFLLLLVILLVLSI  
ISIGVVAYVINTKRFDPFVIQIDDSTGIARIVNPLSSSVLSGNEALAQYFIKKYIARET  
YNPVDFTLAKKTVRLLSENSVYWGYYGILRNNDINPSIQYGQKNTTYLLVKSWSKLSGE  
KYIVRFSINETSARKSFSKIAVDFVYTPMELSDDDRDRVNPVGFQVTGYRVDSS

>gene\_947|GeneMark.hmm|137\_aa|+|28808|29221 >NVVL01000048.1 Rickettsiales  
bacterium isolate NORP64 Contig\_source1382A\_23573, whole genome shotgun sequence  
MIVVRIILASMLILAASGLAYSNDVPLTTDSRIKTYLSPNEVYLLVHYGFQSHIEFG  
KNEEITITVGDYAWKITPLNNRFLIKPMERNIRTNMTIITNRKIYQFDIVAKELESGS  
EKDLVYVVRFQYPPKSR

>gene\_948|GeneMark.hmm|473\_aa|+|29225|30646 >NVVL01000048.1 Rickettsiales  
bacterium isolate NORP64 Contig\_source1382A\_23573, whole genome shotgun sequence  
MSKETNPASSAPPVKTSKVEQDLSQVAINPKQNILILVGIVAVFIYLSFNLFAGDDGNE  
QKPEPTPIKAITRPVQLLANDDAPPIITLPEPPKLEEPTPPPPPPPEPEALLPLPEL  
PSVTTPQNAPPLPFLQPKTDESARRADEKRKSGIILMGGAPPAKTEDQLEESNFKYRGN  
MNLVLGRGKILSAIETAVNTDFGGEIRALISRVDYSEWGNLILPKGSRIFGSYATGIN  
GAYGRISITWTRVDLATGYTLNLAGTGIDALGRTGNQGRVDNFKERLSNAVLKSILDIS  
LAKALDSIVKPKINSQTAARSVGATNLTSIANAIFTQPGLTAKEKRAKICQDVLTAIAN  
KTSNSFLKLSMTCNTLNTDPVASEPNKLLSLMGIINQLSDELIKDVTADSEKTQVQEASE  
KSFEAISDSIKSMAEEQDFHPTITIPQGTAVKIYVKNKDYKFPKKAVIKSRFLK

>gene\_949|GeneMark.hmm|332\_aa|+|30643|31641 >NVVL01000048.1 Rickettsiales  
bacterium isolate NORP64 Contig\_source1382A\_23573, whole genome shotgun sequence  
MNYAALETYLLPFKNIFAEEGVNELMINKPGEVWVEKAGDQRLEIPEIDIDHMLGLGRL  
VAQSTAQTISEETPLLSATLPNGYRIQIVFPPAVEPSLVAFAIRKGSTVHFSLDKYAEMG  
AFDNTSTKEMTDENNAILS NHLKTGHFKEFIRHAVLCKKNLIISGGTSTGKTTFTNAALG  
EIPSHERLITVEDAREVMLPNHPNKVHLLGSKGGQGRAKVTTQDLIEACLRLRPDRIIVG  
ELRGAEAFSFLRAINTGHPGSISTLHADTPAMALEQLKLMVMQAGLGLPPEEVKKYIMAV  
VDIVVQLKRGAGGKRYVSEIFFKGMEGGSDGI

>gene\_950|GeneMark.hmm|586\_aa|+|31631|33391 >NVVL01000048.1 Rickettsiales  
bacterium isolate NORP64 Contig\_source1382A\_23573, whole genome shotgun sequence  
MEFSKLLRMARTLVGHVLIHPFVLFCTFWVSGAIIAMFTNEYELLSSEIFGGIIVLYKWG  
IWLENSWGLSFTSYDYIKIKLAAAITVPSFLVLVYIKNFTRIRNLEFFLPKEAVYGS  
AWASPTIEERASLRAKHGMMLGKDAEGYFVADGFQHALLFAPTGSKGKGVGFVIPNLLFWD  
HSVIVHDIKLENHQITSGWRKKKGQEVFVWEPSPDNGITHCYNPIDWVSSKPGQMVDDVQ  
KISNLIMPEKDFWNNEARSLFLGVVLYLLADDTKVKSFGEVVRTMRSDDVVYNLAVLDT  
LGDAIHPVAYMNI AAF LQKADKERSGVVSTMNSSELWANPLIDTATASDFSIMDIKKK  
RTTIYVGLTPDNIHRLQKLMQVFYQQATEFLSRKMPDVKEEPYGV MFLMDEFPTLGKMEQ  
FKAGIAFFRGYRVRLFI IQDTQQLKGIYEDAGMNSFLSNSTYRITFAANNYETANLISQ  
LCGNKTVEQTSHNKPLFFDLNISTRQNVSKVQRALLLPQEVILPRDDQIVLIESFPPI



RSKKIKYYEDKFFTKRVLPTFVPTQEAFVINNGTNEEEKNKKETE

>gene\_951|GeneMark.hmm|467\_aa|+|33460|34863 >NVVL01000048.1 Rickettsiales bacterium isolate NORP64 Contig\_source1382A\_23573, whole genome shotgun sequence  
MKKKKMRSATIDIGYNAIRATVYEDNTLGAPEIFSSKFKSDLIGLLANQSIDMKHQTYLS  
IQYLLHVFKRLNVTDIKCVATAVLRDHEKAEQFIQHIRDKYNFDIEVISGEKEANLTAFG  
LVKGIRNCKGIAADLGGGSLELAEVGDGKISKLCSLALGTKILSMRNLADENEIIDIKE  
QYSSSEQESLYLIGGSLRFIGKSYMNSAFHYVKNLHNFEIEAGSFFEYLNNAVQTS DGEIS  
KLSSRRINNAVLILKALIHLPKPKIIVSTYGLKEGVRIDSMDEEEKQKDLILEKV KYL  
CTYD TDATDFDSYKII SPLFSAGVDLNEILKLAIMLLSMESQFDSTLPPTALSDSILSS  
EIPFAYKMRVMLAMIIAYSTNHKPSVNLIKFSKKTLTQEEHNNAQIIGYFLYITKEIDGP  
IFMTPSFDIKSCNYFLEIDTHEILPRAIFEKVCMLKLSIAFARRTGY

>gene\_952|GeneMark.hmm|176\_aa|+|34963|35493 >NVVL01000048.1 Rickettsiales bacterium isolate NORP64 Contig\_source1382A\_23573, whole genome shotgun sequence  
MLKNTENSYGSITKIFHWVVALAIISLIAVGFTMHYMEPSPEKFEYGMHKASGVLV FML  
VALRISWRFINQTVLPKDLPNMLKLGAKAGHFMLYIFMLVMPISGITMSIFAGYDIPVF  
GLFTIPAMEKNLQIAGIAHTLHEIAAWGFAIMIVLHILAALYHHFIRRDDTLK KMV

>gene\_953|GeneMark.hmm|204\_aa|+|35540|36154 >NVVL01000048.1 Rickettsiales bacterium isolate NORP64 Contig\_source1382A\_23573, whole genome shotgun sequence  
MNFTINDIPESIAASMRSKAVWTPECPVPIEHLKLEISHYDFAGDIKEGQMIVLDKISE  
SVIKIFTELFARSLQVHSIKLMDEFNGDDNLSMAANNSSSFNFRKIEGSTLLSMHSYGLA  
IDINPVQNP FIMIDEDTHNVRVLPKSSMFLNRSNQRAGMAEPIIEIFKKHGLSVWGGNW  
NNPIDYHHFQVPREDVAELMIGIS

>gene\_954|GeneMark.hmm|375\_aa|-|36200|37327 >NVVL01000048.1 Rickettsiales bacterium isolate NORP64 Contig\_source1382A\_23573, whole genome shotgun sequence  
MKRHVFLYGF SIFSMFFGSGNLVFPMLVGVNLDNWLAGFLGFLLTG IILPFLGLFVIKL  
RKGSYVDFFAEAGVVAKYAIPFTLSLLGGFGVIPRCITVAHGGLFLEFLADLSLVLFSAI  
FCIACFFICLNDKWMFTVLGKFLTPILLFFLILITVGIYESQGLEGVGASFGDNFIDGF  
FRGYATMDLFAAFFSSLIFKQIEALVDETEGQSLIKAALAPSIFGGCLLSLVYLG FVYL  
GSHYAFLATDLP GELILPAIAKHLLGTNGALVIAV III FSCLT TAV ALNSIYARYLCSFE  
IIGEKRFPI LLFITTMIAFFISLDFDGAAMLAPLLTISYPGLIALTILSICTKDFKRL  
KMVSFYGITILMLLL

>gene\_955|GeneMark.hmm|340\_aa|-|37679|38701 >NVVL01000048.1 Rickettsiales bacterium isolate NORP64 Contig\_source1382A\_23573, whole genome shotgun sequence  
MCLAVIVMIFIGGLTRLTESGLSITEWNPVSGALPPQNGAEWGQEF EKYSPEYLQHN M  
GMSISEFKSIYMLEFVHRLAGRFTGLLYLLPLMIFWLMGSINKRDSGT YLFILFLLALQG  
AMGWYMVKSGLVADPCVCHYRLAAHMLAVFMYILLFWQLMRNSFDILLIPGLAPGGVPG  
EALGVVSLCRQKFWCTLSIFLLLIQIMLGAFVAGLDAGLVYNSFPLMGEGVIPHEVSLSS  
VNLASFSEPVFIQFIHRMMAYMLFFVVCIFCFVGARLRHPKFTRSIVCVFAALS LQMIAG  
VVTLLYSVIPVALLHQLGAIILLSFLLWAYFLLKSTESE

>gene\_956|GeneMark.hmm|344\_aa|-|38800|39834 >NVVL01000048.1 Rickettsiales bacterium isolate NORP64 Contig\_source1382A\_23573, whole genome shotgun sequence

LNLIEEIHSYLSREISAMNAVIVENLAVEEELITLISNHLSKAGGKMRPILTILSAKML  
GDAGEPGSSGEPDDAGEVLGSESSAIKLAAVEFIHMATLLHDDVVDGSKMRRFLPSANV  
VWGSRASILVGDFLFSQSFKLIVSTGSPALRALSSASAVIAEGEVSQLAHLEQKSMVSE  
AEYLKIIGAKTAELFGASCEVGAIAGKESSAKTMRDFGICLGKIFQITDDMLDYFSDSA  
KVGKNVGDFFEGKVTLPLILLSKKISADDNLSLQKMLQAESRTSEDFLRVKTLMQENDI  
NTEITNYLAELEQTALVLLRSLSIQNQYCKFLENLVEFAINRTY

>gene\_957|GeneMark.hmm|585\_aa|-|39870|41627 >NVVL01000048.1 Rickettsiales  
bacterium isolate NORP64 Contig\_source1382A\_23573, whole genome shotgun sequence  
MKLIRFIVLVLIIAAAIGAGGYVTHKVADELNEQYAGQKIAVTENGKASHFITFKEVV  
PSGFPLKISWDVRGVIEETESSKTSFTSPVQFGYDLLLQKVFVSYAGDIMSSYKPAKFKF  
GAKLKIEDYMLSVDLPVSMGLINTLRDLEDPVQIINHVGDIINLSSDRVEIFDLIDNQKFY  
DKKYENMKLSFVPQKTYVSLKDLMTNIPQRYVVRYAVETNEIKVPTRKLPDSLFFVFSAV  
PSGMDMRANAVIKTAGNNSREITKNLEVKGDITCSGMFASVKNFKLDYKAGSDKLNRDYD  
LAIDSKLHLKKGAFDHLFEQYKLISSKVALSPSAKMIDREINYIIANKQAFKFQDLENSD  
YDFNLKMSNYHDQDKTYMKINNLDISSEGAGINLKHEIETNSKGFKTYLAKGDLLIRNYS  
AVVEFTSGYIYRFGKFRFLNDAARSLYVDVNKTFKLSISDHPKSVSNDLDFNYEVNSRNL  
KKTGLSVTVDKISELYTLMYKLLFDNVGSGGDVLERMQKILPGIDGKEPLLQKILPHI  
SGGKSIKSIKKEIDKVLPKNAQDLLKKIIPKDKLKKGFLKDLFK

>gene\_958|GeneMark.hmm|87\_aa|+|257|520 >NVVL01000049.1 Rickettsiales  
bacterium isolate NORP64 Contig\_source1382A\_23578, whole genome shotgun sequence  
MFIHAGENWNTWQEEEDKLHACGLATKGMGEAIALFHTYEKEVRQLCVGCGYSGRRVDILV  
DALPTVVWICQPCLTLHERRVHTVDIR

>gene\_959|GeneMark.hmm|49\_aa|-|618|767 >NVVL01000049.1 Rickettsiales  
bacterium isolate NORP64 Contig\_source1382A\_23578, whole genome shotgun sequence  
MSKGKKDIVICGKKNYGDVIIGCNGTIMGRRRRKSKPFTKAGKCKIVVG

>gene\_960|GeneMark.hmm|155\_aa|-|811|1278 >NVVL01000049.1 Rickettsiales  
bacterium isolate NORP64 Contig\_source1382A\_23578, whole genome shotgun sequence  
MPVYIRVLYDAIPHQTRHNLKVVIMSKHGTILKKGEKESRTCMVVDNVVTLHHVTRHGQD  
VDVVMDWGFDFTDVPTSCLMELASRSLVIDCRNAWKKQSEPIATGEEQTSQVFLVSDLLT  
KQKRGKTVSEKVGALVEGMSPEDIAALLKQVTAAE

>gene\_961|GeneMark.hmm|66\_aa|-|1288|1488 >NVVL01000049.1 Rickettsiales  
bacterium isolate NORP64 Contig\_source1382A\_23578, whole genome shotgun sequence  
MSKSELLKALATYPDDAQIVVSFDTRTIAKITHGMDYVTFGIDCVEDGWKPSNVADISIG  
NDLIMG

>gene\_962|GeneMark.hmm|52\_aa|+|1978|2136 >NVVL01000049.1 Rickettsiales  
bacterium isolate NORP64 Contig\_source1382A\_23578, whole genome shotgun sequence  
MASTEKHPRTPGDARKMLAQRKKARGMISKDQKLRSDMLRELLMLEKKGEAK

>gene\_963|GeneMark.hmm|38\_aa|+|2138|2254 >NVVL01000049.1 Rickettsiales  
bacterium isolate NORP64 Contig\_source1382A\_23578, whole genome shotgun sequence

MKRMRAFTMTVMKRLKEYKDKVIVRKAKEDKKNATGE

>gene\_964|GeneMark.hmm|57\_aa|+|2238|2411 >NVVL01000049.1 Rickettsiales  
bacterium isolate NORP64 Contig\_source1382A\_23578, whole genome shotgun sequence  
MPQVNEQLDKLWSNDIPEDTNINAEGLKLGVLKAEVADGVNAGVHQVDNKGASCLK

>gene\_965|GeneMark.hmm|89\_aa|+|2399|2668 >NVVL01000049.1 Rickettsiales  
bacterium isolate NORP64 Contig\_source1382A\_23578, whole genome shotgun sequence  
MPEVTLRGREKSGGGQAGEVFVQGGKILSAIWTGGGTGSAPDPEDYELADIGADLLGIAT  
GVTYHIVGAVGSKSWVATGGTVQNLYGGA

>gene\_966|GeneMark.hmm|92\_aa|+|2668|2946 >NVVL01000049.1 Rickettsiales  
bacterium isolate NORP64 Contig\_source1382A\_23578, whole genome shotgun sequence  
MHPIRAVRNYLDGRKSGKPCRINAKDYPRSDYSSYWVYFINSETFQWRVDFIDYSTGDTV  
RLFGKAAKNANKARILAQKCVLKNIEQYRRVS

>gene\_967|GeneMark.hmm|132\_aa|+|2946|3344 >NVVL01000049.1 Rickettsiales  
bacterium isolate NORP64 Contig\_source1382A\_23578, whole genome shotgun sequence  
MSLGFITALRNNMLDEITALIDAGADGLVRIYDGTQPATGGAVTLLAEGAFSTNSAPAA  
SGGVLTHSAIGDEASAPNGGTPTWYRIVDSTAAFVMDGTAGTSGTDMILDAATITAGQTV  
SFNSSTITAGNV

>gene\_968|GeneMark.hmm|142\_aa|+|3344|3772 >NVVL01000049.1 Rickettsiales  
bacterium isolate NORP64 Contig\_source1382A\_23578, whole genome shotgun sequence  
VSKLSDEITNDPLGRGYAGMDAEQVAFSLTEVKDRPVDNDESIDNIKMYLLRKRKYIVIK  
DSPELAAREFMVLLTEFEQLLFDNPGKRKMFKDILSELVDAGLLTSPMRTALLGFVSFTG  
TRSQELGLGRVRAGDVKESRNT

>gene\_969|GeneMark.hmm|156\_aa|+|3772|4242 >NVVL01000049.1 Rickettsiales  
bacterium isolate NORP64 Contig\_source1382A\_23578, whole genome shotgun sequence  
MAIGTDATIIVLGTDDVADDTSTSAIVDGVMVAADITAWTNDDDAPFANFILNWQSAAT  
TLTGNIFLHVRPINIDGANDSPIPTTADPIGRAGVFEIDGAKAINTDHPYLASIDLRPFT  
MKTSQEFEFYLFNNTGETIAANWDLDDVPLSFNGAA

>gene\_970|GeneMark.hmm|266\_aa|+|4242|5042 >NVVL01000049.1 Rickettsiales  
bacterium isolate NORP64 Contig\_source1382A\_23578, whole genome shotgun sequence  
MPYALPDSRIENASLKSVDTPVGRYEVDKRHWIAHKMTGFFLPGSLIQGVNGFGCENLM  
KGYRDLTFTTASSADPVRVMSDKGRVVDLNDQFLASPEVDTPFISADGVITIAALYRLDT  
HQSSGGSPICRAVTSSSSSTYYATKDYSNRSQFAARIGGSNRTIVYNTGITLGQWVFRIG  
LYDKASGRMELWDRELGLIANNYSYAGDLSTATGSERNFRIACGKQDDANRGFDGVVAMAA  
VWNGIGIDATTIEAFFNDYKQVLIPA

>gene\_971|GeneMark.hmm|228\_aa|+|5039|5725 >NVVL01000049.1 Rickettsiales  
bacterium isolate NORP64 Contig\_source1382A\_23578, whole genome shotgun sequence  
MSLSLIRRKIGAGGGADVTDIVVTVDFFTGSISVAVKVGATVSPFTLEDFTAGISVGVVPV  
QITIASTLDDATGSISAGVLAVATLNATVDDFIGAISASARFNANIASLDDFIGAISAA  
AKVQVTLSPFLDDITGSISASVPVESDFASTLDDFTAVIDVTAATNRTADIVATMDEMGTG

SISASVLAQASMSTTLDDMGAVMNVVTGNTATSKMSPVMRMFIASGRM

>gene\_972|GeneMark.hmm|132\_aa|+|5747|6145 >NVVL01000049.1 Rickettsiales  
bacterium isolate NORP64 Contig\_source1382A\_23578, whole genome shotgun sequence  
MKRLWLASLLLMTFNVYAQNFTLTWVNATEREDGSELLQSDIAHHKLRDSETGTIIIDNI  
EGTLTSYIYNFPTGVYIASMTTVDSGREGSAYSPFLNFESVTDSETLPVIVEPPTSPQQV  
IITITVDVETTP

>gene\_973|GeneMark.hmm|165\_aa|+|6155|6652 >NVVL01000049.1 Rickettsiales  
bacterium isolate NORP64 Contig\_source1382A\_23578, whole genome shotgun sequence  
MNILQEHMLMKEDSPVYTSAQYEEEEKASGDRKDDGSRKLLKLTTPRHEEMIAMHLDGMRN  
KDIASAYQITDSTISIFLKDPLVLAVISEARVQNEARFASLYGKVVVDIEDSVNGAESID  
IRLKGASLYLKEVGKPKVGERKTAEDVVQQIINMQINGDIVVKGGA

>gene\_974|GeneMark.hmm|141\_aa|+|6652|7077 >NVVL01000049.1 Rickettsiales  
bacterium isolate NORP64 Contig\_source1382A\_23578, whole genome shotgun sequence  
MIRLEKNFILSELVHPALYKQFKGASYNMLNIRLSPTLQSIIRDVFGQMAINGFFKGRFLK  
DSGLRRLPHGKVGAKRSGHKFGYTADAKFYDTTPIEVQRHILEHQEDFPYITRMEDANITK  
TWLHIEVGTNNRVGAIYVFKP

>gene\_975|GeneMark.hmm|104\_aa|+|7061|7375 >NVVL01000049.1 Rickettsiales  
bacterium isolate NORP64 Contig\_source1382A\_23578, whole genome shotgun sequence  
MCSSHNWRRLLLESYLPEIIIAALFIIGQLFILANRVKDLWDWHNINDEEGVKIWIYVRKS  
LEDAVKDMAASTNKIATVLDLDRMAERDILILRVLEKLENNANRSR

>gene\_976|GeneMark.hmm|56\_aa|+|7392|7562 >NVVL01000049.1 Rickettsiales  
bacterium isolate NORP64 Contig\_source1382A\_23578, whole genome shotgun sequence  
MFKSMLIKWVLPVVDLLIEALVSLSKSSNTVDDAMAAMFVANKETIIIEIKRNL

>gene\_977|GeneMark.hmm|522\_aa|+|7562|9130 >NVVL01000049.1 Rickettsiales  
bacterium isolate NORP64 Contig\_source1382A\_23578, whole genome shotgun sequence  
MATRERLVIENMLMIADKDGNDVPFTLNSAQVKVDSRLTGRDIIPKARQEGVTSYFLARN  
FIRCLSKRNTAVIIAHEEDATKRMLRKVHYMIENIRGPKPKVIKNASANEIVFSKTNVSF  
YIGTAGSRQFGRGDTITDLHCSEVAFWKDPKSLGGLFQAVPRSGNISIESTGNGTGNWF  
HRSTMRAAAGSSRYRMHFLPWQDFKEYTVPLNDLEKSRILNNLSEEFEEVCMARGFTAG  
QIAFRREKLEELDYLQLFKQYEPETLDECFQATGFSIFSIVNYEATDKWCNAGNGTHVL  
EGHPKAGHQYSIGADVGAGVGKDYSVAEVDLTDKEQVGEYRNNRIDPENFGFKIVSLGS  
EFNDAFITCENNNHGILTVKVLKEKYPNHLQYSQVRLRRAANEIDRITDYGFRTTVKSKP  
FAIGELRSSLAKEWLIHSPILKDELDTFIENDCGQLGAETGCHDDTVMASAMVAIGEPKA  
IIMTMPRAILVHDTPEPFLIENIINECVSKGSCNHAITVQV

>gene\_978|GeneMark.hmm|416\_aa|+|9137|10387 >NVVL01000049.1 Rickettsiales  
bacterium isolate NORP64 Contig\_source1382A\_23578, whole genome shotgun sequence  
MRILIMSKSGDALGIAHRMVLEGNQVKMFIEDTRYADAGKGLVERVAAWRPHVLKSDLVM  
CDMVGFGRYEETLEKFGKPVLMCNKFADMAELDRGKGMELFDKFGIETPETFIFNTPKEA  
LDLLAVWEDPGFVIKPFGNIDTGKTYVIENQRDYEWALSTYKDNQKLLVQRTVEGIEIST  
EGWYNGREWIKPFNHTFEEKRFMSGGVGRNTGCMGNVVIPASSDSKLVQETIMLIEPWLK

KINYRGCVDINTIVNATNAYALEFTIRIGYDAIEALAEGLMEPLGDFLFEVALGIKKSME  
LKPGVFMAVRVSVPPWPMNEPGKDDAGRPIHGINEQALKHLFLTDVKMENGEYVYAAGDG  
VVKVTAQGSNVKEASNRINRSLEKVTVHDMQYRDDIGSRVKGDISQLKAWGWLNE

>gene\_979|GeneMark.hmm|567\_aa|+|10380|12083 >NVVL01000049.1 Rickettsiales  
bacterium isolate NORP64 Contig\_source1382A\_23578, whole genome shotgun sequence  
MSNGYNSNGSVDITWWLDQIQEGEKFRKKMAHEDMWETWRKYRGEWNNVQPSNIYFKM  
LRTTVPRIYFRDPVVSITPAKPGIENMLFAKILERIDNKLLRKMKIKRQMKRIVHDTFMF  
GTGFGKLGYGAEFSPDFNDAGEAPTGSVKRPNKVEYNSNIQPNQPWYLRTGPGSILPS  
GLEEFDEARVWVHKIMRPRSDVLDDARLKIKDKSSRNRSFLMTSITVMGVQQSIDMVT  
LFEVRDKKTGSVFIISPDFSEEVLLKADEFQVHGSVPIYSVNFNPDDMSTWGV PDSQIL  
DPIQRELNENTQIMWHRMSLRKIFTRKNLMSESEKSRMVSEEIQAVIEVDGDPRTDIL  
FKDGNIPDDLFAQAQDATRTDGRESLGF SRNQFGEYNPGSSDTTAREATIVNNSSEIRID  
ERRDTMADMLTDVVNDVHHIIFNKWGTDEVIDIIGPAGVTMWVSFKGEMLRGQYNNVND  
PDTAINQSRQQRQNTAIQVYNLLKQDPMVDQFQLRSYLMTEMAGTQFDNMLKLPQEQLNG  
TQNNPLSLEEAGQQFRGPVQVQATGGNQ

>gene\_980|GeneMark.hmm|85\_aa|+|12083|12340 >NVVL01000049.1 Rickettsiales  
bacterium isolate NORP64 Contig\_source1382A\_23578, whole genome shotgun sequence  
MPLYDYK CERCHTTIEVFHKIKENPPLCDGSKLVKLIQPARVRMFRAGIYEHIAHNP IQ  
IDSMKQLKKECKKHGVT SAYAEDIC

>gene\_981|GeneMark.hmm|136\_aa|+|12375|12785 >NVVL01000049.1 Rickettsiales  
bacterium isolate NORP64 Contig\_source1382A\_23578, whole genome shotgun sequence  
MKDDIRKITITITDLDFTNPKVEVEGEFNGAQSRRALAAGGKYIRVRATRAHYERQY AEE  
AAAQAKEDAKTVAKQKAKEAADILTEERLANEIEEQKADTIIDSSDGVGWEDTDEEDDDH  
LLNTHD TDNGVLNEDK

>gene\_982|GeneMark.hmm|221\_aa|+|12786|13451 >NVVL01000049.1 Rickettsiales  
bacterium isolate NORP64 Contig\_source1382A\_23578, whole genome shotgun sequence  
MAEEIKNEDVFKEFTNKMVGAIDALGERIGTIETTVGAQSTSLQAIQDNAVAPAPIIKDE  
ETVSLAEMDLESMSRGRDFARAITAAVSSMREEFKPINEQVGT LQNSNETQQLRTEFNDV  
ANKHTDFGSYKDIMLGMVETHSHLSVQEMYTI AKANNPDIATQAASAEAEANPPANKGDA  
FGGLTPTSGSTIQNKGEANTTDAAEEAWGETMTDTPESAVG

>gene\_983|GeneMark.hmm|324\_aa|+|13481|14455 >NVVL01000049.1 Rickettsiales  
bacterium isolate NORP64 Contig\_source1382A\_23578, whole genome shotgun sequence  
MPASLTEQLDNLYTTT WQNMKSTVADSIFDSTPFWFWLKS KNKLRQERGGRFISEPLQYD  
RNDNVQWIGKGGTVPLNDFEFLTIAKYDWRYLTASIVRFGVDDQ QNRGKNEIINLMKAKM  
ENSKNALVSELETRLFGASGAGDSAVDGLQLLVADDPTASATIGGIDQSLASSAWWRNKS  
TNGSFATNGTNNMRTMLNNSVSNLQSDTTDII VAGQTPYELYENEIFDTHYRVTNNKLA  
DAGFENQVYKGRPMVWSPSCSNRMYFLNTNFLSFV FPMMNFDMEWKAIPDQVNDRAA  
QVILAGSMTVSRRCQGV LHSITA

>gene\_984|GeneMark.hmm|154\_aa|+|14468|14932 >NVVL01000049.1 Rickettsiales  
bacterium isolate NORP64 Contig\_source1382A\_23578, whole genome shotgun sequence  
MPSGLKRVFLTPFDTV DTSKKEGVGTIRFEGSKIYKIYQYSEEAAVASVVG EYVAYVAA

SGYANNDVTSLSASDAVGAGVLQAILADNEYGWIQIKGYAVLTIALTAGADGDPLTPTG  
SADGALDVSIAVSDNVCATAGDISAQEIMCNFVF

>gene\_985|GeneMark.hmm|231\_aa|+|14972|15667 >NVVL01000049.1 Rickettsiales  
bacterium isolate NORP64 Contig\_source1382A\_23578, whole genome shotgun sequence  
MGTLYTLQIKEEVLGFLGNRDDFTSRIDTIVNIAQMRIARLSKFEELKTSLTDDLTLTGG  
ITADKVYTLPTNLRNIFSIKVYEDTGDRYVKLVLGSLSTQFDKKFTKPSKESRNMPVIFYHR  
WGSTIEMYPIDKNYKIDIRYNKWPTVLAADGDLSDLQEKDDAIITLAASWMFMSLKKKE  
DANFQWGVYKNMMKIDILGEDRESSDITYGVDPRRPVAVGLGYDNPFVVRGMN

>gene\_986|GeneMark.hmm|127\_aa|+|15667|16050 >NVVL01000049.1 Rickettsiales  
bacterium isolate NORP64 Contig\_source1382A\_23578, whole genome shotgun sequence  
VANLISLNQPVQLRQSNVKDADLYSELRTLLRDIEKQFLAIAIANDNTAGGAVIILNG  
ATSVVVTHGVFSFIPLAQDINIISTENPTNDPGNFWLSSITNTQFTINCRQDPGASGLGIS  
WNIHRTT

>gene\_987|GeneMark.hmm|252\_aa|+|16062|16820 >NVVL01000049.1 Rickettsiales  
bacterium isolate NORP64 Contig\_source1382A\_23578, whole genome shotgun sequence  
MTVFTRTWNPAYEALPPDTENAKNGAERINETKVDTRERFEVDHSQAGDVEDDGMHKKVTF  
VDPLGAKPLQLNDETYLYSKDVDGSAELFFEDEAGNETQLTAVGKMVIDLVYPVGAIAS  
ASSTSPDTLFGGTWTALADKQTLVQQGTAAAGTSGGSSVAVNVDHSDTFSLSSDGAHA  
HNRYSSASLGGSSALTGLQSSSATGNTASSAAISNGSHSHTMSGGVSSAGVSGTDANMP  
PYLSVHMWQRTA

>gene\_988|GeneMark.hmm|592\_aa|+|16828|18606 >NVVL01000049.1 Rickettsiales  
bacterium isolate NORP64 Contig\_source1382A\_23578, whole genome shotgun sequence  
MAEIINNLPEEGWQYQIINELGGGLVQNVPKQQLLEDGQFPFLENLIFKDGLVHVDTGVAL  
FGNIVLGAPRIAFQFFLTNSTDFLVLNTNAVFTWSSGTSSWLPYNDGTVTTVTNTTVPL  
GAAQVSLVSTTGVLVGDIMCITLDNGHIQAVTVTIVASPLVDFTEPLQDAATSGNAVYET  
TKLSGTDDIQPSVTVYPYNDWMVWTNGVDNPMYFDGAVLAVIPNLPSSGATLCKLVSTFN  
NRLMLANTDEAGVPHQIRIRWSDAGDPTEWLLGDSGFQDLFDESDFLIAVAPLGPFLMY  
RDRSIVRAEFVGSASKLNFETVISGEGAISQDVLVDVGFHMFSGSANIYEEKGGFDLE  
PVGDVYKVFSSSTGELVPNTKHRGFGLYIEELDESFWFVPHISSDAYPSRVIRFNAQGE  
GWWQRTFPFQISGFGYFESTGNVTWNDWDGLTWNDLNFVWNAKNLQDNAPIILLCGATGQ  
IYTYDYNVAVTDAGTDISYVLETKAFGHPRVSYRFDEYEFYLSGADIKVEYSLDRGRTWFD  
LIVTTSPGAQVISVRSYKQLVGNYSFRFSGSDAFTLESFSFQHSVESEHGG

>gene\_989|GeneMark.hmm|302\_aa|+|18608|19516 >NVVL01000049.1 Rickettsiales  
bacterium isolate NORP64 Contig\_source1382A\_23578, whole genome shotgun sequence  
MANIKDVILGVAPKAVIEQRDTINKEQKSGLAALLQELQGDAPQVSPVTEGQQTLIDQS  
VGGNAVAQGEIDSSTEALKRFLDPAGDFDDQVQNPLIRDFNENILPQISRFGFNDFSSSE  
RQRGDERATEDLLQTLVSEKSRFLRDDRATQLGAGNSLTANASNRGTILQQFLQSAGIGR  
DIEEGGNLKDGEVRQELLKLLGASTNPTKETIGIAQGGQKGVLDIISVGSFAFSKKS  
RRLKKNITRIGTFNCGAPKYMFAQYVWGDWSIGCMAQEIGDYVSGAVLMDDDGYFSVDYSK  
FS

>gene\_990|GeneMark.hmm|407\_aa|+|19552|20775 >NVVL01000049.1 Rickettsiales bacterium isolate NORP64 Contig\_source1382A\_23578, whole genome shotgun sequence  
MAIVINVPRDDRFSDIGEGIGELVSALVDRRRDDKDSKTIEGIGNGSVTVSEGLATVSAR  
NRAAAQQAGANYNRDNPKRSLQLDDAGGAISERVGRFKQPGEVSAKVATFNKERKATDK  
SAALSEIRSTQINDSPTFSDVSEAGRNRRAARNINDQSVDLSRFNKNLYDKLGDLTGDNRI  
RVDRRNIHYTDYIRGDNGKPITLTKNAFTLAKQDAEKELQGFLSAQNSNDLITPEEYFG  
RPQVLPKDKDDTTPIPTANQEVSPVDAFKSFASSASDIIGGMFNAQEPVVTDSDVSIVDP  
EIRVSEATDSAINANYPLQDKEEWVDVGEVYPMVPQSMMDVVKAGNAGAVAPTYAAMANV  
PVHVALQLLLQNSKAPTITMLETKVIPDSVTDPEQDGNINTGTIQR

>gene\_991|GeneMark.hmm|1278\_aa|+|20780|24616 >NVVL01000049.1 Rickettsiales bacterium isolate NORP64 Contig\_source1382A\_23578, whole genome shotgun sequence  
MAMSPEDMQVLIDESRIKLQEDKQRQNGYIKDVQANPPVTQEELREMITQPGREQRDDEG  
VLDYVADEVMDIGSSAVGAVELGAEFTTGMFAAFAGTVVGTAKEVADDPLGFLPGPINIA  
LSSLVEKDTMKKHGKFFMETFQDYTEAMTYQPRTVQGGQALSHYAQQFLGKFQDWGEQAGD  
AVLEETGSPLIATAVETAITGAPVYVPIGGKILQRRADKAKLERRRELIDEGFDTPLDP  
TAINQSMPLDPKRKIATSPVDRLAPDVQSIQNKTAQAKQDKQLKDLEKQVRDPNQKTLGLE  
EFPRINEDAATPHPDRGRKISTSEAVSRAKKVDQIQDASIIASGRRDIPSVRQVKDLIME  
TTFDASAGLRRRILSGNDKTQNRLLLEHNKQSGATPKAQIDYIKSENKIYTNLAREDCI  
LLDKFINSRLTIQVDLNAALKKQLPPKHSGNRTGVDHKIALAVTRKRIGEDKYNMLMKRA  
DDYFRVHNRLGLDFVEGLITKKQHNSMKGDIYSPRKFLNVDPPLNESLTAGTVSFDIFG  
KRVKLNDSGLRELKGSGLDMEMNSKLLQEVTVRITARIWRNQSNVMLLDWVKKNPDNG  
WVRVAKEGEGKAGKKSIDAYIDGRKATMLVDKGMALQWVGNTYVMGHGFSSFLRTLSTGQT  
IMKPLTTGMNPEFALKFLGLDIVHAHFATDVFSPAPIYSLQLGKNLAVTMKDAFFKGDR  
FEAYINEGGGMNFLTHQGTDALGGKGVIRSNNTTWRKTKTALSFLNEGFEIWRVLAIQERS  
IAIGKSPSEAAIAREYIDFSQGGTFKSIDTVFPYFNPVLQSVRSISAAATRGDKSQKV  
LGLRKRFLYQVAELSAYMGAWAMYQELHFPEVMRQLPTEEKAKFFIFVGRGIRNKQGEV  
QYAYVKIRKDNVVAALINPAEMAVRNIITGEVDDQTLAYFKSASPVLPAELSTPTGGML  
HTFTYNHDFWGNPVWNNPDLDAVSPDEFTGHSVGKEQSSVFFRDVKGALGMAPERLEA  
AMGNIAPSNGLDFGGFAYKKIVDQMLMGNPEDPFLAEQVFEQQLTRAPFLRKMISLTHP  
AYRVMEDSKEPRTKSQVLRKNQGDNLDSLIIANNTSFSTVKQWVRQQKPEDQKRLTSYIT  
RTELHKIFNGKTEMSLNVPGFFWNHVASEIKDNEEKAEVLYWEWKKMPTPQDRNKFDR  
MKRLSVDKQILPGTTLKHFRIMQQRWGTEGIMTSEDGGTFHMYGKRHYMKEMRVRMKQQE  
DRKQQAGSIDQSLLPDIP

>gene\_992|GeneMark.hmm|399\_aa|-|24758|25957 >NVVL01000049.1 Rickettsiales bacterium isolate NORP64 Contig\_source1382A\_23578, whole genome shotgun sequence  
MSNREISDWLDGYLKYTYETEPVYHTWVGLSLIAGALQRKVYFKWGHDTLYPNLYVVL  
VGPSGRARKGTAMNIGKDISSIDTIRVASESITREALIRDMKDAVNQYQDSTSGRMIFH  
CSMTVMSEELSVFLRKNNDNGFLSDLTDWFDSDRTWYRRTKGAGTDKIQGVCVNLLGATAP  
DWLPSILPQEAAGGGFTSRIIFVVEEDKGTVPPEPKFTEEMHELRLSKKDLKISLING  
EVTFTPEAKQLYIDWYVDFERKISEGKTIIDDPFRSGYLDLRRATHMRKVAMVCSMSRNSD  
LFITTDDFNRADSLHTVEAKMPKAFGGGLGRASYSEMADKVITYIRDNKVVKRSDLLRKF  
YRDVDPATMEMIEMVMNQMLVSMQDPLKGEVYKYLG

>gene\_993|GeneMark.hmm|510\_aa|-|25978|27510 >NVVL01000049.1 Rickettsiales bacterium isolate NORP64 Contig\_source1382A\_23578, whole genome shotgun sequence

MLDESVLIYNGYDVANTLQCKEEIWKVTKDSAYTYDFTMRLLNPLMYMMTRGVKVDKFKL  
DILRKSLEHQIDRKQLRLNELCGRELVNNSPKDCQTYFYVEKNIPPYYNSKRVGQYKKS  
VTTDDKAMQRIARGTAARKGLYEATLVQDIRGMRKMVGTYLDMEDKDGRLRCSYNPRGT  
KFGRLSSSKTIFGTGMNMQNLPLEFKGFIVPDPGNLMWEIDKKGAEWVAVAYLSGDANMI  
KVVEEGLDPHAYTAHLMTGVPIELIQEEDAIIGHTNDPNLVSQGRAKLIKGLANQHAYE  
QAVFLPRTMTIRQCGKSNHGLNYDEGYKMFALINEMLEGDAKRICHMYKHIVYPGVNLW  
HKSIQDKLQQDRTLNCFGSRMFLGRWEEKLFKEAYAFLPQSTVVDIVNTGMEKFYYDR  
RPDMCAPELLAQVHDSLLGQSPLDGDYAKMARVFKTIGDYMEPTIEYGGREFTIQNELKV  
STDNWRDGVVEVDIYAGDEELGRQIQNIVEK

>gene\_994|GeneMark.hmm|60\_aa|-|27500|27682 >NVVL0100049.1 Rickettsiales  
bacterium isolate NORP64 Contig\_source1382A\_23578, whole genome shotgun sequence  
MLNNNEVPYEECNKIFISSNSGDTIPSWYTTDCQYRVYSRITKSKFMGGKIKWGMVYHVR

>gene\_995|GeneMark.hmm|335\_aa|-|27675|28682 >NVVL0100049.1 Rickettsiales  
bacterium isolate NORP64 Contig\_source1382A\_23578, whole genome shotgun sequence  
MPFIPVQQERSYFGDGEKSSKICIVGESMSKWEIRSGRVFSGPVGTIYEQCLHGANLTRA  
DVYATNIVKIEAKFTLYREKKGFTDLGKEAVNALKKEISELDCNIVIAMGEAATFALTG  
RMDVTKCRGYIFPCVFNPLLKVIPTIHPAKVQFGDYIARHYISHDMNKAKEHSSYKGLKY  
DLTKVEIARTYLDVAWTWLEEIATWKHVSIDIEVINYECSCIGFGKSIDTSIVIPFYGKDL  
YTLEQEINLWRLVAIIMYDENIAKTGQNFIFDMQFLLARNRIVTRGTIYDTMIRHSIAYP  
EFLKSLAFLTSIYCNRPYWKDMVSWKKKDKQKND

>gene\_996|GeneMark.hmm|113\_aa|-|28684|29025 >NVVL0100049.1 Rickettsiales  
bacterium isolate NORP64 Contig\_source1382A\_23578, whole genome shotgun sequence  
MKPFYVVASPYSNQQASVRQQRFDMVCKYTANLICGNIASFPIAHSHNMAEALGIKAHG  
FSFWEDLDVFLIERCDILHVLCPLDWEVSGGVAKEIEKANELGKPIVYIPWGV

>gene\_997|GeneMark.hmm|69\_aa|-|29022|29231 >NVVL0100049.1 Rickettsiales  
bacterium isolate NORP64 Contig\_source1382A\_23578, whole genome shotgun sequence  
MRLVRKGTDKVTQNTKLVHEKMYQVFAIIPNEEYPKGMIVNLNTGGEIHSWQQFYF  
NFLGLEFIE

>gene\_998|GeneMark.hmm|442\_aa|-|29215|30543 >NVVL0100049.1 Rickettsiales  
bacterium isolate NORP64 Contig\_source1382A\_23578, whole genome shotgun sequence  
MSNRKLISIPVDIIIGKFRKRYEGIEELSTSIVKGLIQPVTINSKELMAGGRRYMA  
HVMGQLSHIDCIMLEDSSSEVDLREVELVENLYRQDMTWHERAELTDYIDQLKKANDPNW  
SGRKTAELLGKGSAAVAKDLKLAELKNVPELKNCKTEADANKVLVNISKKIDAQQAVDK  
HKENPAILAAVTHYTIGDAFLGMEEMYDANPNSMVSLIEIDPPYAIDLQNIKKADLTKDG  
SITNYNEVKTNDYEDFITRTCTDVFNCAGEDCWVIFWHAFQWQQLIRDSLEDVGFIVDPV  
PGIWLKGEDGKEGSGQTNQPKTYLARCYEPFLIARKGKPEVQKQGRSNVFSFKPTAAQK  
YHPTQRPLALMNEIITFVHPNSIIMVPFLGSGITLRAAYQNHCTGFGWELNENNKPLFL  
ASLLEDGFGADILEENTDEVST

>gene\_999|GeneMark.hmm|96\_aa|-|30536|30826 >NVVL0100049.1 Rickettsiales  
bacterium isolate NORP64 Contig\_source1382A\_23578, whole genome shotgun sequence  
MALQIYVLQKPPPFMLFFNKYTKINTKLIKPKETSIIHMDLEDLRFVEFSEGSIVILFNDKN



KDTSSITHIHNIADQEKLTLFALDVQYKDEERDHE

>gene\_1000|GeneMark.hmm|100\_aa|-|30826|31128 >NVVL01000049.1 Rickettsiales bacterium isolate NORP64 Contig\_source1382A\_23578, whole genome shotgun sequence  
MLVDVYEAGNWEKTKWRIYTMARQIEDILPNFLDISANEQEQIVRACRYNKYVLKPSHQA  
HKKKAGKKKTKVVSNIKIKNLVKNMSEEEIEKLMANLAENT

>gene\_1001|GeneMark.hmm|82\_aa|-|31177|31425 >NVVL01000049.1 Rickettsiales bacterium isolate NORP64 Contig\_source1382A\_23578, whole genome shotgun sequence  
LSTKWTQEVIKMSSDNDSTTRINIVIDSEQNTLLNKMLPWGAKSDIIRNIVEILIKDLEQ  
DSSGDFYSALVKHNVKLVKIEE

>gene\_1002|GeneMark.hmm|103\_aa|-|31429|31740 >NVVL01000049.1 Rickettsiales bacterium isolate NORP64 Contig\_source1382A\_23578, whole genome shotgun sequence  
LGLAPRVLFKEQDMSDQLNSEIVGVPMPTELNNAVNRMGQIQVQLSIVLSKISGNDNSIE  
SQLIPQQDMCLREVLESAPTKLFEDQDIILKQIEDLDRILFCK

>gene\_1003|GeneMark.hmm|141\_aa|-|31843|32268 >NVVL01000049.1 Rickettsiales bacterium isolate NORP64 Contig\_source1382A\_23578, whole genome shotgun sequence  
MSFIQVNLDETIKERSAVPAGAFDLVISDVSDKPANSGSAMLTITHAIDGDDDAMPVKHW  
ITLPTKGDDADTVRQKSLGLKRYLEVAGIDYGEEGFDTDVLYGHAFSCSVTNELVDTDKD  
GNPIDSPYEVNRLSIPFLASE

>gene\_1004|GeneMark.hmm|287\_aa|-|32291|33154 >NVVL01000049.1 Rickettsiales bacterium isolate NORP64 Contig\_source1382A\_23578, whole genome shotgun sequence  
MASLLHAPLVVVTGKMIMMNRAMMPNTKDITNTPRMMVYSDPGGGKTTQFLTIPGRKF  
AYLFDPNATQSLRGADITYEEFYPCDVSLRLTSLSKKNKAPSPKARTGAEAYNAWEKDFE  
KKLESGFFNDFDVLFDLSTTFSDMVMMDGVLAINGRGGQWPQQDDYGPQMLAIKNVFRAL  
TGLGIPLYVTAHYKTLQDELTKKVYNQILVTGQLRQKLPPLFSEILYLEASSDGKGNVNY  
LAQTKPDRMFPTVRCSTKGLDYKTDITIDYDKPLEGQGLGGLFFNTL

>gene\_1005|GeneMark.hmm|86\_aa|-|33220|33480 >NVVL01000049.1 Rickettsiales bacterium isolate NORP64 Contig\_source1382A\_23578, whole genome shotgun sequence  
MSDSYNAHADDGRRKIKKENNVQSIQILTDRGIELKRHTRYHYCITGNLKGIDFWPSTG  
KYLTSYNTTIGRGVFNLIKEVDKARG

>gene\_1006|GeneMark.hmm|325\_aa|-|33640|34617 >NVVL01000049.1 Rickettsiales bacterium isolate NORP64 Contig\_source1382A\_23578, whole genome shotgun sequence  
MALRYDNTRISEARNCMRKFRLRHLRDWVREGLARPLLFGQCWHNAMDVVWLHADSDKT  
DREIFELAGMAFNQQWLAEGGPDPLTMSPDMQAYWSPRTPGVGAEMLNHYIKTRREQIRQ  
FEVIGIEVPPFAVPLDPPDPELFFIGRLDKLFKNKQGDIIIIEHKTTTSYSKKDIFRADYI  
SSWSPNSQIDGYLYATHMLYGSSVKSVMVDAALVHKTVHNGFKFIPVNRSAHLKSWLYD  
TLFWVNMIENEDFRYEQLKPDDEYLAAYPKNTGACSQWAGCTYKDICTMLPNPATQELPL  
GFKKEHWEPFDVLKIEELGMVKGNG

>gene\_1007|GeneMark.hmm|120\_aa|-|34724|35086 >NVVL01000049.1 Rickettsiales bacterium isolate NORP64 Contig\_source1382A\_23578, whole genome shotgun sequence

MTTKVTAIGKTKDDKGAVTGENEGVIEFNFGENLEEAVKLYGKDAVFNNYRQASTIALQG  
NMRRHLSQGKKGKELLAALKDWKPGQVSRQKKSAGEKLQAMLKGMTPEQVAATLKEAGIG

>gene\_1008|GeneMark.hmm|62\_aa|-|35204|35392 >NVVL01000049.1 Rickettsiales  
bacterium isolate NORP64 Contig\_source1382A\_23578, whole genome shotgun sequence  
MARATASIDTIYIMQLSEKEAQYLLCITQNPPISEPKTEEESEDTRDREAIFLALTAGV  
TF

>gene\_1009|GeneMark.hmm|202\_aa|-|35398|36006 >NVVL01000049.1 Rickettsiales  
bacterium isolate NORP64 Contig\_source1382A\_23578, whole genome shotgun sequence  
MSKVVHLRISDEAVYTCLQVLKVNVTNLPLATIVRRFIEGATDNYRIQKKLPLPEDL  
SFIVSALSNDIETPIVMEDVGFVEPLPDGLDQDKMDNIRKAMAASSLGNNSPEVVVRDVV  
EDEPVELPPPWEAFHILRWATILDRAPKDVLEEVVTNKSIPLQRAVQCIYSDLPIREW  
GTEYTANLVQKILPTINKYFEE

>gene\_1010|GeneMark.hmm|48\_aa|-|36020|36166 >NVVL01000049.1 Rickettsiales  
bacterium isolate NORP64 Contig\_source1382A\_23578, whole genome shotgun sequence  
MINKNIGDSSTPDTWKPTSDSIRDERIDAELQEAFDIVRQEELARERQ

>gene\_1011|GeneMark.hmm|58\_aa|-|36156|36332 >NVVL01000049.1 Rickettsiales  
bacterium isolate NORP64 Contig\_source1382A\_23578, whole genome shotgun sequence  
MILEITNRTKSLALIALALLVLLNGLRSTDPFTQGLLFMYTLVSFVVAIAATGESHDK

>gene\_1012|GeneMark.hmm|97\_aa|-|36322|36615 >NVVL01000049.1 Rickettsiales  
bacterium isolate NORP64 Contig\_source1382A\_23578, whole genome shotgun sequence  
LEKIMKKKLCVVKQVSLEYLQFISDVDYQLCYKDDENYIRITEVVEVDFPDIDKIELLNA  
ELAALDTQATKIKAVAEAAITGIERKRQELLAITHDT

>gene\_1013|GeneMark.hmm|89\_aa|-|36741|37010 >NVVL01000049.1 Rickettsiales  
bacterium isolate NORP64 Contig\_source1382A\_23578, whole genome shotgun sequence  
MNTTKIFKTTWLAVCLSVLLVALTGCRNDNLPFELQDAKQPITIVLSNEAGVIVSDGDG  
RIYAYKESYFANMIMKSDLKKGDVITGN

>gene\_1014|GeneMark.hmm|108\_aa|-|37328|37654 >NVVL01000049.1 Rickettsiales  
bacterium isolate NORP64 Contig\_source1382A\_23578, whole genome shotgun sequence  
MDKLLKESEAATGCEASAVERLVIPFGAKVHVVTQKYRRKITGRKKEYVTQEFTANGIFLG  
WRTISNGVTYCDHEEGCHWEADKYLQAALVAISPTTNPLYIPVDGIEV

>gene\_1015|GeneMark.hmm|73\_aa|-|37700|37921 >NVVL01000049.1 Rickettsiales  
bacterium isolate NORP64 Contig\_source1382A\_23578, whole genome shotgun sequence  
MSKKNWNDLVSKYDKLIGGEYTDDEGMLFTFVGLIHSDDDFYYGLIPKGGSEKGMILRLS  
CVCALESFGYDRI

>gene\_1016|GeneMark.hmm|84\_aa|-|38310|38564 >NVVL01000049.1 Rickettsiales  
bacterium isolate NORP64 Contig\_source1382A\_23578, whole genome shotgun sequence  
LLCAGLEYEMATVIINNVEYIEKPKDIKPPENIHNATHWAVLPDDSILFYRVDDEVVLWQ  
PLSQLWIPPSTVPYTLHSYDDYST

>gene\_1017|GeneMark.hmm|74\_aa|-|38637|38861 >NVVL01000049.1 Rickettsiales  
bacterium isolate NORP64 Contig\_source1382A\_23578, whole genome shotgun sequence  
MKRIDFLYALLACSIMICAYANGGEIYAFSASLTMIIIFYALLAWAQFEENRLLRISGNFA  
GDEFNEKYKDLSGT

>gene\_1018|GeneMark.hmm|105\_aa|-|38965|39282 >NVVL01000049.1 Rickettsiales  
bacterium isolate NORP64 Contig\_source1382A\_23578, whole genome shotgun sequence  
MKTITFDMNKYTDSELLNFVSGTSLDRAIDPPASSFRTEEQEQRIIDETKRLLANPIEIN  
DACIEEVLELYRIHHNHDLLEFGESVHRYFTVLAKAQATELVLDYK

>gene\_1019|GeneMark.hmm|70\_aa|-|39279|39491 >NVVL01000049.1 Rickettsiales  
bacterium isolate NORP64 Contig\_source1382A\_23578, whole genome shotgun sequence  
MGDTMRKDVDDKLTNIVIEGADRNDYPDFSDAYIASADDADGRPLTEDELDKLNEEYPEI  
AQQHAMESLL

>gene\_1020|GeneMark.hmm|58\_aa|-|39550|39726 >NVVL01000049.1 Rickettsiales  
bacterium isolate NORP64 Contig\_source1382A\_23578, whole genome shotgun sequence  
MNKIEEYVILYHTNVLDLSFEVDRFMKMGWIPHGSLATLSDSGGYEYFQAVIKVAQD

>gene\_1021|GeneMark.hmm|82\_aa|-|39723|39971 >NVVL01000049.1 Rickettsiales  
bacterium isolate NORP64 Contig\_source1382A\_23578, whole genome shotgun sequence  
MRQTIVVLEIPTGRHYTRFNALDAIVLIKKRISRLLFVIPTIDVPDGLTGGMFVALIDE  
SIERGEKINSFLKMLGGGIT

>gene\_1022|GeneMark.hmm|35\_aa|-|39968|40075 >NVVL01000049.1 Rickettsiales  
bacterium isolate NORP64 Contig\_source1382A\_23578, whole genome shotgun sequence  
MKTLKRIVEMIIYPLPIVVILMIGWGFLNMYVEAQL

>gene\_1023|GeneMark.hmm|64\_aa|-|40072|40266 >NVVL01000049.1 Rickettsiales  
bacterium isolate NORP64 Contig\_source1382A\_23578, whole genome shotgun sequence  
MAQFEIKTRRIRNLTEELNEFFSDNGLPPGSADEVLIDKEIELTTWQQAYLLNFIERWNK  
ELLI

>gene\_1024|GeneMark.hmm|66\_aa|-|40271|40471 >NVVL01000049.1 Rickettsiales  
bacterium isolate NORP64 Contig\_source1382A\_23578, whole genome shotgun sequence  
MSVLVQCIQDYDDAEHMSRLIKKGDICAVVDVREYILRVITSHYHGTDQWEVVSFRFYVT  
NNKNRS

>gene\_1025|GeneMark.hmm|71\_aa|-|40471|40686 >NVVL01000049.1 Rickettsiales  
bacterium isolate NORP64 Contig\_source1382A\_23578, whole genome shotgun sequence  
MIRFRYLPNISLTQIILTGKATSRFFVTGKVSDINKVLLADIQVPEDLSDVCLNEALSS  
RVGYTKAHEVR

>gene\_1026|GeneMark.hmm|57\_aa|-|40748|40921 >NVVL01000049.1 Rickettsiales  
bacterium isolate NORP64 Contig\_source1382A\_23578, whole genome shotgun sequence  
MELSEMVTTLQKLLKDHGDLIVLDANDYPIEEISLCVSTYSAHGDHAIKLFSEGDEH

>gene\_1027|GeneMark.hmm|251\_aa|+|1|756 >NVVL01000050.1 Rickettsiales  
bacterium isolate NORP64 Contig\_source1382A\_23633, whole genome shotgun sequence  
AMAMAMALALAMAMALAIAMAMAMALALAMAMAMAMALAMDKKTFIQNFVIQRTKTLPAE  
AISDAVTAYDSIEALFPKFAKDSKEGFQTAKGRYITDHR LAWFD AIWTVWNVGISTGTKG  
GKKQAGDAFLDQIKNKNDAMAYASAREHAEKERPALEAKGSTPPYFNKWFNDGRWDTKL  
IVSDEFEMDRPPPVSKEVIDLR CGIHECDNIIKQFGGYGATEGNTNIIKQAKERKEDLTA  
KLMQASRNETV

>gene\_1028|GeneMark.hmm|116\_aa|+|743|1093 >NVVL01000050.1 Rickettsiales  
bacterium isolate NORP64 Contig\_source1382A\_23633, whole genome shotgun sequence  
MKQFNSKEWSQGVEVVTGGMDSVRIICTDGP GHYPVVGFIGSDSEASQWNDIGCYCRDLG  
TDCRDIFFKPKTITKYANILTRGNGDKYLSNMFHNKLVLNNAASIAIATIEWEE

>gene\_1029|GeneMark.hmm|56\_aa|+|1379|1549 >NVVL01000050.1 Rickettsiales  
bacterium isolate NORP64 Contig\_source1382A\_23633, whole genome shotgun sequence  
MRCKERKDPKDFGRLNGKRKENC FVCEEERENNVVTSLPTRTLKTSQEWLLKRW

>gene\_1030|GeneMark.hmm|83\_aa|+|1551|1802 >NVVL01000050.1 Rickettsiales  
bacterium isolate NORP64 Contig\_source1382A\_23633, whole genome shotgun sequence  
MDNLHNDILESFEKNTTSRNVSYTRVIRC NKGLWKVSSH DYGFAEKAIREFLKYFTGV  
YDVIDIDTDLIKFSNGWVMQVSYGG

>gene\_1031|GeneMark.hmm|137\_aa|+|1792|2205 >NVVL01000050.1 Rickettsiales  
bacterium isolate NORP64 Contig\_source1382A\_23633, whole genome shotgun sequence  
MGDEWLNSDHSKAKFLEHVEKIYDEHKHVAFTIKTGKQRTNTQNASMHKYCELLASELN  
EKGLDMDLVLSKGVSPWNKILIKELMWRPVQLAMTDEQSTTKPKRQDYGEIYDVINKYI  
AERFGIYVPWPSREEMK

>gene\_1032|GeneMark.hmm|62\_aa|+|2202|2390 >NVVL01000050.1 Rickettsiales  
bacterium isolate NORP64 Contig\_source1382A\_23633, whole genome shotgun sequence  
MSVKIRNHKDDPDMLEVYSIDWRGEFTLWGSVHFDILTEFEVEITKDDLDMERDLCIKE  
GK

>gene\_1033|GeneMark.hmm|37\_aa|+|2387|2500 >NVVL01000050.1 Rickettsiales  
bacterium isolate NORP64 Contig\_source1382A\_23633, whole genome shotgun sequence  
MKALELIESLGRIVSGLARADIRKDVDMQKIWIKVER

>gene\_1034|GeneMark.hmm|58\_aa|+|2573|2749 >NVVL01000050.1 Rickettsiales  
bacterium isolate NORP64 Contig\_source1382A\_23633, whole genome shotgun sequence  
MSGYWDMGGSYGMSEFSQDLNKE LHRLARFKNETEIIKITEPRQDRVYEKLVWLNE

>gene\_1035|GeneMark.hmm|173\_aa|+|2768|3289 >NVVL01000050.1 Rickettsiales  
bacterium isolate NORP64 Contig\_source1382A\_23633, whole genome shotgun sequence  
MAKKCKECKSKIENPYSSTQIACSPLCAILLAQKARAKEDKKKHKEMKEKIKTKGKWLQE  
AQQEFNKYIRKRDEGNSCISGRSTGCKINAGHYRSVGACPELRFCEDNVHLQCEQCNCF

KSGNAIDYRIGLIKKIGLDQVEWLEGPHDLNNYTIDDIKEIKARYKIKVKGML

>gene\_1036|GeneMark.hmm|67\_aa|+|3302|3505 >NVVL01000050.1 Rickettsiales  
bacterium isolate NORP64 Contig\_source1382A\_23633, whole genome shotgun sequence  
MIDLRDVRIDICATSPAISVGEVEIILTYEPTGQSVSGKSTYLLKEKLLYRLDQKVLW  
GTGGDSI

>gene\_1037|GeneMark.hmm|138\_aa|+|3492|3908 >NVVL01000050.1 Rickettsiales  
bacterium isolate NORP64 Contig\_source1382A\_23633, whole genome shotgun sequence  
VILFKKLNDAIIPKVQTDGAAGFDLHCVEETS VWGGEVTKVMTGLACAIPDGYLGLIKP  
RSGLAAKWGINVLGGVIDSDYRGELIVLLTKHTAMPFDIHPGERIAQLIVVPCMNQCMEV  
GDLSTTRGVNGFGSTGE

>gene\_1038|GeneMark.hmm|62\_aa|+|3901|4089 >NVVL01000050.1 Rickettsiales  
bacterium isolate NORP64 Contig\_source1382A\_23633, whole genome shotgun sequence  
VNSYTHGIYKGA AIFYNGLPISQEEAIDLLNQT VKLKQEF SILTSKLTALIKRRLKQE  
EI

>gene\_1039|GeneMark.hmm|85\_aa|+|4086|4343 >NVVL01000050.1 Rickettsiales  
bacterium isolate NORP64 Contig\_source1382A\_23633, whole genome shotgun sequence  
LNIDELRNRFINSHKATINKKEFEILDKQFKQIMIESEASAISCDLVNSLLTKKINENKH  
LTRLINTLKIQSNCFEQSIRELMVK

>gene\_1040|GeneMark.hmm|126\_aa|+|4450|4830 >NVVL01000050.1 Rickettsiales  
bacterium isolate NORP64 Contig\_source1382A\_23633, whole genome shotgun sequence  
MPDSISNSSVVQALS AVLALVIGLLGSFAAWVGVNIGRIDYLEKSSQYNKINLAKSNEK  
FSMALTALGETVERNERQHKERIDSDRRETSRRLAYLEKMHEQSRMDLKELFDKHAQNLE  
RIISNR

>gene\_1041|GeneMark.hmm|136\_aa|+|4827|5237 >NVVL01000050.1 Rickettsiales  
bacterium isolate NORP64 Contig\_source1382A\_23633, whole genome shotgun sequence  
MKAHELKLEHGLELKP YRCTAGELTIGYGINLDAGITEEEADYMLDNRVRS LTTQLHNI  
DFWIELSGVRR AVLIDMAYNLGLSGLLKFRRMLAAMEVRDFDKAAIEMENSRWFNQVGNR  
SKRLQKMMITGDWWTD

>gene\_1042|GeneMark.hmm|205\_aa|+|5728|6345 >NVVL01000050.1 Rickettsiales  
bacterium isolate NORP64 Contig\_source1382A\_23633, whole genome shotgun sequence  
MRSAINQVPHQEIRVAEALLPKRVMFVRHPLTRLASAFNHFWWLTLNTRYHEFVPAGV  
ILADGGRLEGRVGGNEHHFSGDRKKFYDDKLAEEIAKGGTTEEIAVRLKQEDWNR FIDHV  
LSGNDDHWAPQLDI AKHDGQIVANIAHRFEDVRTHWTKYVGGTLP ELNSWQDV PKIDYR  
LAELRSYYDETLTFWGAIDGTW NAG

>gene\_1043|GeneMark.hmm|206\_aa|+|6392|7012 >NVVL01000050.1 Rickettsiales  
bacterium isolate NORP64 Contig\_source1382A\_23633, whole genome shotgun sequence  
VASFTP DADD FLLAYVAIEDGNSTEPMSGQDDGISWARIGDIETATLQHGVFFGA AVGS  
SPSSGVVTA AHGTTVGMTLQVTSISSVDVSGTVANALLQNDQGGGYASSLTLTLDATAL  
TVGGWSVFGNTVIPEGTEINGTSVDQLDTSMDYDASGDASPSASVSSGNTYFVGF AVELK

EAGGATYPLEIQEFTKFKNRQPILGM

>gene\_1044|GeneMark.hmm|147\_aa|+|7015|7458 >NVVL01000050.1 Rickettsiales  
bacterium isolate NORP64 Contig\_source1382A\_23633, whole genome shotgun sequence  
MGRIVYGALSGVSISSDATQDIWNLLAGTNKRISLHGWELTSAAVAAALCSVSLQRVTTA  
GTGGS AVTEQASDEDSGTIDSSMVTDVETPGTPDGVLMGYQWEQLGPVGHIIWTPEMRPKS  
VDSQGFALVCNTAIAMTVSGWVCWEEH

>gene\_1045|GeneMark.hmm|147\_aa|+|7537|7980 >NVVL01000050.1 Rickettsiales  
bacterium isolate NORP64 Contig\_source1382A\_23633, whole genome shotgun sequence  
MFAVLTGTALDTIDEDDITGSKTIIVTLHNDTFKAAGTGPIGSTADTQALIDGFDAAS  
SPTNGWNNNEVRDKALTSEVVRTSSTIATWTVAAQSGYDVSAQEITGTIPTDVLVIGFGA  
ITATPNFTVDAVSSGLGSGHLLLLGTG

>gene\_1046|GeneMark.hmm|606\_aa|+|7992|9812 >NVVL01000050.1 Rickettsiales  
bacterium isolate NORP64 Contig\_source1382A\_23633, whole genome shotgun sequence  
VADNIELSTGSGGATVKTDGSAHWQYVKVSFGADNTQTRVTSSVGLPVDILAGTATIG  
EVTIGAATGAAGDLAKAEDAVHSGSDIGVMSLAVRNDTLAALAGTDGDYAPFQV NATGAL  
YIQEGAALDVSAATLTVNAHAVTNAGTFVVQEDGAALTALQLLDDAVATLGTTTYTETTT  
KGNVIGAVRNDTLAALAGTDNEIAPFQVNASGALYIQEGAAMDVSAATLTVNAHAVTNAG  
TFVVQEDGAALTALQLIDNIVHVDDAAFTLGTHSGVMMMGFAGTQSVNANDAGAIAMETD  
GAVHIHDGGSITVDGTVTANPASGTIDT VTTVAVTDITNTIDSTISGAALTALQLIDD  
PVFADSAFTLGSSKVNQGGVFQSGTPTALTDNDAGAVLLNSTAGQMVELMASTAVIGS  
VINAGTFATQNTAQASTNTQEMVGDVAHDAAGNPVLIGSRATAAIEALTEVAEADASY  
IATDLQGAIITRSYCTAQEQVEFYIGNTDGAEDAVTGLDAGGAGVHNYVTSIIVHNAHAS  
TNGFVTL LDGSGGSISAVFPAPATGGVVHRFDPPWKQPTANTALFVDVSAAITM HITIS  
GFQQQG

>gene\_1047|GeneMark.hmm|46\_aa|+|9812|9952 >NVVL01000050.1 Rickettsiales  
bacterium isolate NORP64 Contig\_source1382A\_23633, whole genome shotgun sequence  
MSIDYIYKLLGMKEVELNATRAERDLIKAEVKLLKEELET LTKVAD

>gene\_1048|GeneMark.hmm|59\_aa|+|9952|10131 >NVVL01000050.1 Rickettsiales  
bacterium isolate NORP64 Contig\_source1382A\_23633, whole genome shotgun sequence  
MPLLTIIITNLGMGGTASTVRETRMRGENIITMPSQNRSLYMPNENRSIIMPPNRRKVDP

>gene\_1049|GeneMark.hmm|100\_aa|+|10128|10430 >NVVL01000050.1 Rickettsiales  
bacterium isolate NORP64 Contig\_source1382A\_23633, whole genome shotgun sequence  
MTVKWHRDLIFKGDDAKDPSDVVDYIDFGPMLQVDAISTITATGTNITIDSSNSGNVV  
TVWTSAGTDGTIATVKLLIVTTNATPRTFERSFKIEVRNQ

>gene\_1050|GeneMark.hmm|125\_aa|+|10427|10804 >NVVL01000050.1 Rickettsiales  
bacterium isolate NORP64 Contig\_source1382A\_23633, whole genome shotgun sequence  
MTIRRPQQLFTSAARTATIVSSVLSAEEVISSIFTIDCTAVTSTPSVVF SIEGKDPLSG  
TFYNIIDSAAITATGTTTIQIGMNIIAAANIAANEMLPSEYRITATHGDGDSITYTVGAV  
H MVQN

>gene\_1051|GeneMark.hmm|99\_aa|+|10830|11129 >NVVL01000050.1 Rickettsiales bacterium isolate NORP64 Contig\_source1382A\_23633, whole genome shotgun sequence  
MPKTGVSVAAHNRQMRRDALREQLSNQKHVEHVIVLLDKLRDLDEELDNLEITRLSKVID  
TKLKLINKYLPDDKEPSDLNLIAQVTTQTHEQWLESLNE

>gene\_1052|GeneMark.hmm|512\_aa|+|11122|12660 >NVVL01000050.1 Rickettsiales bacterium isolate NORP64 Contig\_source1382A\_23633, whole genome shotgun sequence  
MNELELQKRKRLKSDFAFYARNCLFIRTKDKGLKPLQLNKAQLFIHQKLEEQKDTTGKVR  
AIIKGRQQGASTYIEGRFMWRRTHEKGVRAYILTHEDDASQNLNMAKRYFEHLPKFKV  
PSTSAANAKELLFNLLDSGYQIGTAGNKSVMGRSQTNQYFHGSEVAFWPNASEHAKGILQT  
VPDADGTEVIYESTANGVGNFFHQQWKAERGENDFIPVFPWFVWQEEYSKTPPKEFRAT  
VEESELAEQYDITTDQIYWRRTKIADLSADGTDGERSFKQEYPMNAAEAFQLSGESGLIG  
ADNVVKARKSEVNGNGSYIVGVDPSPRGDRFSIIKRQGRKAYDAKSWTGEAVNSLGKAVQ  
KCKKVLDTACPTANKKPDMMFIDAGGSDLVDRHLHELGYDNVKAFAFGSSPLDADKYKNK  
RGEMWGMENLWLADENLDVEIPDDDEIQADLCASPYDRDSMDRIVLWKKEKIKKEYGFSP  
DIGDALALTFAPVVSQGSKLSIPVSSGGWMNA

>gene\_1053|GeneMark.hmm|685\_aa|+|12653|14710 >NVVL01000050.1 Rickettsiales bacterium isolate NORP64 Contig\_source1382A\_23633, whole genome shotgun sequence  
MPEKKLSTFSQAEDKIIKQFMADFDLAFTAESNRADMVDDLKFAALDQWDEDVKNDRE  
GRPMLTLDHIGQSIRKVTGGIRQNMPSIKVDPIDGADKETASVLEDLTRQIEQTSKAQA  
GAYMTAANFQVKMGYGVWRVNTVENTDDIFTQDIVIQRERNPFTWYFDPDATEPQKQDGR  
FCIKSETMSADKFKMLYGKDVSPSTSPSVGESMERWYSADSVRIGEYFVKKKKKRELTQ  
LSNGVVIPTDEITQQDVQGYREQGIEPVKTREVEIDEIHWHYKLSAFDILEHTIWPVKYFP  
GIPVYGVVEENIEGKTEYRGIVRPAKDPQRMNYWNSAAAETIALQPKAPYLVTKDQIKGY  
EEFWNQANQKNLPLYPNPDAKAPPPQRIAPPSMQSGLLQQAQISAQDIQQATGVFEAST  
GQLPEQRSGKAVIALQQEADLGTSLFMANLASAVEHTGRVILDLPKYYDTQRMIRLRGE  
DDSIKFVEINRPMMLTPDGMRIQNDLTRGKYDVRVGVGPSYRTRRIEAASSMVELARVFPQ  
ILEVSGDLVAKNLDWPGADEIAERLRKLLPPGIAEPTEEESEMQMQQQQQQAQQQQQIQQA  
AIQLEMAEKQAKIGNIEADTANKKASAVKGLTEAEQNDVENAVALAELARDQGNQQLMNQ  
ALAEIVGLIQSAPAPQQAPTGLVG

>gene\_1054|GeneMark.hmm|65\_aa|+|14740|14937 >NVVL01000050.1 Rickettsiales bacterium isolate NORP64 Contig\_source1382A\_23633, whole genome shotgun sequence  
MHILIDGNEYRVDEQTKLGDYIKGKGEDVYFICTQAKMDEVKLRQFAVARQYAHDLQK  
VAKLF

>gene\_1055|GeneMark.hmm|267\_aa|+|14986|15789 >NVVL01000050.1 Rickettsiales bacterium isolate NORP64 Contig\_source1382A\_23633, whole genome shotgun sequence  
MSEEAESEVTQDAPIAESSPAPDATTEIENVDAIEPKKVNKVQERINQLTREKYEARET  
AALEERIKQLETNPKVTKPEIVAPNEDDFDNHSHYQQANAKFVAETASNAAYDRISAEN  
QVRDQANTETARQAEKTKKAGFDANLAEKRGNFEDFEDVAYGHQFMSIDMAERLFDMDK  
GPEVAYHLGSNLDVAEKIFALPPIQQAIELTKIEFQVDALKPKLVSGAPDPITPLGSAEK  
VSKDEDDMTDAEWLEARYAQINARNSQ

>gene\_1056|GeneMark.hmm|397\_aa|+|15799|16992 >NVVL01000050.1 Rickettsiales bacterium isolate NORP64 Contig\_source1382A\_23633, whole genome shotgun sequence

MANTLLTTDKILRESLRVLHAKLNFIGRVNRSYDSSFANKGAQIGDTLRIRLPAQYEVTD  
GAVLTAQDTEKNTSLAITSRKHVGAFTDEELQMDIDSFSELHLEPAMSVLAAKAESDM  
INSVYKQVYNQVNNVASDMTYKLIGNGRKLLVDNLVPQDNTVTACLNTSDNLDLNDALKG  
LFNPQSTIGANFREGGIGRTSGYSFFENTHMPRHHTGTDDGTGDYLTDSATAQTGASLTI  
DTGAGTMTAGDVFTVAGVNRVHPETKVDTGNLQQFVVTTAIGASATTITFTPEIATGPY  
QNVSNGAANNQALTKVGGNAAAHDVSLGFHRDAFAFATADLPVPGGMDMAGRKVMMDGISM  
RFVVRGFDIVNSRFVSRFDITYGFNAIRPELAHRWANN

>gene\_1057|GeneMark.hmm|160\_aa|+|17005|17487 >NVVL01000050.1 Rickettsiales  
bacterium isolate NORP64 Contig\_source1382A\_23633, whole genome shotgun sequence  
MALEQIGTNTDEGAVMPGRHLEVISGLAGGTTARQLLASESGSLCLFDDAAGQIYILPAP  
VVGMMVFDLTTVAGTSNSHSIDTDASTTFMGGGVAAVSTAVAEGGDSFVATISSTVSLDM  
DSDVTGRLVGSAIRAVALSSTTWGISGTTTHGVGTLATPFA

>gene\_1058|GeneMark.hmm|66\_aa|+|17528|17728 >NVVL01000050.1 Rickettsiales  
bacterium isolate NORP64 Contig\_source1382A\_23633, whole genome shotgun sequence  
MVCTECGHDNSAVAAKDPWCMYKFENGQVVNKLFDPKIPKGFDFSPKAAKAGKTSKAT  
SEGLTV

>gene\_1059|GeneMark.hmm|129\_aa|+|17725|18114 >NVVL01000050.1 Rickettsiales  
bacterium isolate NORP64 Contig\_source1382A\_23633, whole genome shotgun sequence  
MTTAQNMIDSSAKMAGILAEQSQSLESGVNTDALNRLNRMFARWANIGIDLGLATLAASDT  
VYVDVADEEAIELSLALRLMVKHRRQIAPGLSEAGDQMVTELOSKYSNLPVMALDAALSG  
SQRYNINNG

>gene\_1060|GeneMark.hmm|465\_aa|+|18107|19504 >NVVL01000050.1 Rickettsiales  
bacterium isolate NORP64 Contig\_source1382A\_23633, whole genome shotgun sequence  
MAKIPVPLVGPTYTNRSLPVGAQVTRNFYVEVNQGGDEAVSMQPFPLKEWGSAGDGFDR  
GLGVNLGILYKVSDELVSVDRRGDAVLIGTILGSTRCTLVEDTAGNLVITGHGKPYAY  
NGATLTLGKDGDLPKASTAAYINDRVIYESTTGLAFADLDTPLTVNSANILKANTKADGM  
MAVVAHRQQIFAFGAKSIEPNSFIGTGTPPYARVNNAVQQVGTSAKYSVSTNNNIYIFLD  
NNKQPSRMSGITIQAIGNPAIGQAIKYSVSDCFTVCFDFNQQDFCLFSFPTGDETWLF  
NEQSQLWTNLAFGVEDQHLISDYQFVYGKHLVSDRRNGNIYEIDMNTYTDNGLVIHRQRD  
TISISSKDLGPPGHKLFMNSLQLVIEPGASLTVQATVMMQYSDDNGRTWSSERWADIGE  
QGDYTYHVEWLGLGSFYNRMFRRFMSDAINWVLISAHADVEMGLG

>gene\_1061|GeneMark.hmm|178\_aa|+|19497|20033 >NVVL01000050.1 Rickettsiales  
bacterium isolate NORP64 Contig\_source1382A\_23633, whole genome shotgun sequence  
LAEKIAPYVQPIPKFVLETNNQEFINWFSYDNLWKQDINVLGFGDAITNVTNSESFETS  
SASSEYQAHKRELEQIEDLIPTTQVRELYSKIVTANYTAVNNDFCDIRNGSTVTLDNAG  
WNDQIITNGDGSSVKVTSTIELRYKQQRGNTITIRQEGTSIHWYLFSDGTEKFWRAS

>gene\_1062|GeneMark.hmm|50\_aa|+|20030|20182 >NVVL01000050.1 Rickettsiales  
bacterium isolate NORP64 Contig\_source1382A\_23633, whole genome shotgun sequence  
VSIEAESIDHERDIETSAEEQVRLKAVIAGLALILDVEPELLIKIAEDL



>gene\_1063|GeneMark.hmm|201\_aa|+|20184|20789 >NVVL01000050.1 Rickettsiales bacterium isolate NORP64 Contig\_source1382A\_23633, whole genome shotgun sequence  
MAGIEFLYQDDQTGFDARVKGSDNRFNASSRSDSRGYYNARDAGQAYSVAFEMTTPVAGE  
YFAYWQNNHPNSLQLVISAIGVNAVQASRIKLHVVTGTAATGSGVTAITPLNMNRSSPNT  
AASSGVTTAVQGDGTGATGIGTLTSIGLVDFLYVAATGHEEFRLDDRLRLGVGDAIALEYD  
EGTTGDVAGVMFGYYEKKGRA

>gene\_1064|GeneMark.hmm|419\_aa|+|20789|22048 >NVVL01000050.1 Rickettsiales bacterium isolate NORP64 Contig\_source1382A\_23633, whole genome shotgun sequence  
MGIKVTPSGADQSGQDARASLHNRGGVGVSVNYVREYDNLRADIKFFFNETYGGEMNQAI  
VSSEVATVIHDGGDTTNADSGTATGGTSGTNLEDTGQNFLTTVGVGMTVRNTTDTTYAVV  
TAVVDNDNLTLDGSMVDTETFTVGAVWVGTGDASFNFASGAKIVCTAANNNDAAALFTNA  
GTSDMQHFVLTGKIDLDAYNSANHSVEFSFLSSSVLVGNAVNDYINVIDVSEQSFSI  
PLADMGITSQTVNELQAVVLRSGGSKPTFKLDDLQLGDASGSATWMALPDHGTTFLAKRL  
RFVLADNITEIEYDKFMGLAALTNGVNLIVSNGESLFQGIIRDMGGFYLAGIDEKTSSL  
GATNSWTALEIDITSPVVDGTSGNKAGLDDGFYLTISDDLGLLRFGIILGDTVLE

>gene\_1065|GeneMark.hmm|110\_aa|+|22050|22382 >NVVL01000050.1 Rickettsiales bacterium isolate NORP64 Contig\_source1382A\_23633, whole genome shotgun sequence  
MARNPFRDIQIATTTLTTVYTAATGINSTISVSLVNTTATALNIDVYHNDGATDFLKN  
TIHIPGGAGRERLYYGFERGVLAAGDSIKVQADGATAFNLAIFYGSEIESS

>gene\_1066|GeneMark.hmm|156\_aa|+|22357|22827 >NVVL01000050.1 Rickettsiales bacterium isolate NORP64 Contig\_source1382A\_23633, whole genome shotgun sequence  
MGQKLRVARTFDIDVINAFLKHPKVKDCIGDDFSGDVEYPIVDNIYYLAVYDRELAMFV  
VYPLNAVTFDAHSAMLPKYGKAKEAGRLAIDWVFNHTGCLKINGSTPIYNKLALKYSE  
QIGFIREGVNKRSMKDGQLHDQVYFGLEREWVLS

>gene\_1067|GeneMark.hmm|239\_aa|+|22812|23531 >NVVL01000050.1 Rickettsiales bacterium isolate NORP64 Contig\_source1382A\_23633, whole genome shotgun sequence  
MGIELAIGGALLGSSLLGAREQRKGAQSAADAGERAGLAGIAEQRAAREAFEARTQPFLD  
LGLSAGEQLQGFLQDPSAGLDQINPVASFLQEQQFRQIREGGSGGGRNVDQDLRFQTGL  
TSTLVPQFQQQRFNQLFNVLGLGQNAAVGQGQAALTTGGNISNLLGNIGQAQGGQAQQA  
AANQGVISNIAGLAGFGFGGGFGGAPAGGGAPSGGFNALNPNLNFNSQQPNLLQSTGTF

>gene\_1068|GeneMark.hmm|368\_aa|+|23531|24637 >NVVL01000050.1 Rickettsiales bacterium isolate NORP64 Contig\_source1382A\_23633, whole genome shotgun sequence  
MARFNPLADFAGGKSSALGIKSQEQGIAREAAAAPVRNQLAQIQLQQAQTGQRREGQQFD  
QEQALRRIKLLNQGAKAIGATDPSQWQQAIPRVVQFLGAQGVDAQELAQQVTPESLTSFI  
AQTDEFRLDPSKLTSAQKEFASLTEGFSPEDIKTRRVKAGIDPRAVGSIAQTISAKNMA  
ADIAKTEGTIAEGKEFGKLTGSSRAKAIDSGFDKIQSISKNIDNINKAIEEIDAGASTGA  
IESRFFPSIRASTVALEQIQSELALDVVGATTFGALSKGELDLAKEVALPTKLEPAELKK  
FLVDKKSAAQEKLMAYYQEIQIDFIDQGGTKAGFLRSKERVSTGQEGQIMVDAQGNRARVF  
KDGTFEEL

>gene\_1069|GeneMark.hmm|641\_aa|+|24640|26565 >NVVL01000050.1 Rickettsiales bacterium isolate NORP64 Contig\_source1382A\_23633, whole genome shotgun sequence

MAFDLSTAKPVKRRFDLSTASPVVGAIDLEAFDPAGESVPSGEARPEFIGSGVLEPIAAI  
GSGALASVAGGLAGLGAELTPGAEPGVGGDVVRQFQEAAFQPKTRAGQEGLENVGNVIQS  
MVDRFNVPASGIGALLELVSGQLDQAVQTEGIIQAQGVGPTVAERTFQQTGSPLAAATA  
GTIPDLVGAILGTKGAGQALKTPQAQAIGREIQAVPETAKQVVEGVAGLQRPATRELARE  
IQAGTADPAAARVELKPLRTFEGEPTGIERFFDTRGPKIQKDSLAAQAVKQGFDEGVIQP  
LKQASRTDKKVMRMAEVAERISKDKLFGMKNRPGDLAGDVLMNKVRAVRDANKRAGKAI  
GIEARKLRGEKVVANAGDKFLEDLDGIGIKLGGDGLDFTGSIIEFQGGPKSTIRNIFK  
RIGDIENPTAHDVHELKLLIDSEVYTGKGLKGLAGKAERILKDYRNNLDVILDESFTDYN  
NANVAYSETIKALDALQDVAGKKMNLGKNADKSTGTLMRRLMSNAQSRRILLDAIEDIE  
EAVKKHGGSDLLRIEGKAGKADNLQMLVLFADLNDVFGPAARTSLQGQFDQALQQGVRA  
GTTKAGALDLGVSIVGKIEKLRRINKPRAFKAIKELLKEP

>gene\_1070|GeneMark.hmm|725\_aa|+|26565|28742 >NVVL01000050.1 Rickettsiales  
bacterium isolate NORP64 Contig\_source1382A\_23633, whole genome shotgun sequence  
MANQKMSEVPNPIIVDAAGTAGSGYVLKAYDVGTDSKSIDADATSPQTSVTANSNGV  
WEVSGNEIVPHINGVYKWGIFANATDATANTPFYMGPFDSIQGSASTNNWFFAENYSTFA  
LAVAAAAGKTLFISSVIAPGATETVAGLTIVILEAGAINPTTGITITLNCTVHNWSQSQT  
VFGGAGTIAGWHNLVLGPEAGAALTPVFAGHNTMIGAYAGQNTTTSRDNTFIGYECGKA  
HIADASSFGGNTAVGANCFDVNTTGYQNTAIGNTALDDNVTGNFNTAVGYGALQKNLLSN  
NTAVGIQALYLGNNDATGIGMFALANCTATTKNTAIGFSAALNFGKASDGYLGSDTN  
LFCGAQAGLASREGNRNTFVGGASATHGATDMTGDNTFVGAVSGDLNIVDGDKSTILG  
AYSVDPIITGQTTSTTTDKLVDSTEHTTNAAYVGLTVKNLSDTEVTGNHDSGSGASVLT  
DSGESWGVNDFLGRIIYNTTDGSSGVTANTGTTITATLTGGTENDWDASDSYTLRVGRT  
TVSAVDSATTLNHNIMITGENYEMFDESSTVSLCAGGSSNAPKPRFYSPDGSATIGK  
LGSSGRLYKNLSESVTTPGAASSFIIQVNIPSGAKIIGCQLKVDALGSGETWSAAYSGG  
STQSIVTTGQVITAGHIVDTFFDVNAATDIASAEVDVTITRDSGNFTSTGAIRAIVHYEA  
FQSMS

>gene\_1071|GeneMark.hmm|86\_aa|-|28705|28965 >NVVL01000050.1 Rickettsiales  
bacterium isolate NORP64 Contig\_source1382A\_23633, whole genome shotgun sequence  
MNIGAGNFIELGEHDNCVIIGDNLKATQDYHLIEGVCDQVMTPEEHKLINA AVAVTKQK  
CEAYYGNLLYQAKTLSSYSGTPRNER

>gene\_1072|GeneMark.hmm|79\_aa|-|29169|29408 >NVVL01000050.1 Rickettsiales  
bacterium isolate NORP64 Contig\_source1382A\_23633, whole genome shotgun sequence  
MAQYLKKGSKVYIEGKLQTTKWQDQKGDDRYTTEIVVRDMQMLDSRNSGESTQTRSAQPP  
QTQVDDGKQIDDFEDELPPF

>gene\_1073|GeneMark.hmm|68\_aa|-|29393|29599 >NVVL01000050.1 Rickettsiales  
bacterium isolate NORP64 Contig\_source1382A\_23633, whole genome shotgun sequence  
MKGVNKAIIVGSLGADPESKTM PNGYMVCNISIATSEQWLDKNGQKNEKPSGTERSALDV  
PPRSWPSI

>gene\_1074|GeneMark.hmm|211\_aa|-|29624|30259 >NVVL01000050.1 Rickettsiales  
bacterium isolate NORP64 Contig\_source1382A\_23633, whole genome shotgun sequence  
VFEFHDI EQNTDEWLQRCGRLTSSNLGKVMANFGKSFGEPAKRLAAQIAVQQITGKCES  
NGFSNEHTERGHEQEPVARMLEYEERFFCDVGNNGFFSTKDLGCS PDGLVLDSGAVEIKSV

IAATHFATVKRQNVDPAYRWQYIGNLKFTGRDWLDFISYCSEFPADKQLYIHLNKSDMT  
KEFDMIDSRVEQFMALVATTKETILESNSYN

>gene\_1075|GeneMark.hmm|188\_aa|-|30252|30818 >NVVL01000050.1 Rickettsiales  
bacterium isolate NORP64 Contig\_source1382A\_23633, whole genome shotgun sequence  
LLWLGQLNIGESKKGKVMGEEKTHYRKAFNSPYLSSADIVGPTVLTISRVLQSDATNK  
TKDSFNTAYFEEQELRKGERLKPMLNAHNSKVMKDLTGSHFLEDWSNVRVTIYVDPNVR  
FGRETVEGLRISPPAESKATITPEKGQMWNTAKNAYLRDGDFAVLKRAHISEENQAL  
IVKECGSV

>gene\_1076|GeneMark.hmm|61\_aa|-|30873|31058 >NVVL01000050.1 Rickettsiales  
bacterium isolate NORP64 Contig\_source1382A\_23633, whole genome shotgun sequence  
MRVSPTQTTVNAIHKNKHVGHQINLDCKLMGMYLEGLSLIKVEQQRKEKQEKWAEFIKVLK  
Q

>gene\_1077|GeneMark.hmm|82\_aa|-|31055|31303 >NVVL01000050.1 Rickettsiales  
bacterium isolate NORP64 Contig\_source1382A\_23633, whole genome shotgun sequence  
MINKQLNPLIDFMINRTDGIPGSDNCDDIAVLIGESITLIEIYFQDYINQPSTDNANAL  
AKKLTQTFSDYVEKEDTFRIMQ

>gene\_1078|GeneMark.hmm|57\_aa|-|31300|31473 >NVVL01000050.1 Rickettsiales  
bacterium isolate NORP64 Contig\_source1382A\_23633, whole genome shotgun sequence  
MLPEYIKRKYGTQRGALQAFADDIGRPYQSVQRWIRNKYRVEDGRVVKKQTVVVCVL

>gene\_1079|GeneMark.hmm|76\_aa|-|31626|31856 >NVVL01000050.1 Rickettsiales  
bacterium isolate NORP64 Contig\_source1382A\_23633, whole genome shotgun sequence  
MDLTRFDAAKKALEFAGFNVCDDGGVLEISKDRICETFYQTGEHFNSLSFHKS SVESVAVY  
AEKSVILGKKYPLSEL

>gene\_1080|GeneMark.hmm|95\_aa|-|31877|32164 >NVVL01000050.1 Rickettsiales  
bacterium isolate NORP64 Contig\_source1382A\_23633, whole genome shotgun sequence  
MAITINQILELDINSRNLVDIGYNDSLRNFYRFYELDRLEKDITKALKISSLDQLQAVA  
IKYKNSGLNAFNCDDLIEDLMGDDYYDWADANILD

>gene\_1081|GeneMark.hmm|55\_aa|-|32910|33077 >NVVL01000050.1 Rickettsiales  
bacterium isolate NORP64 Contig\_source1382A\_23633, whole genome shotgun sequence  
MRPFDVSHLASKRICKQAEQLCNELKEAIHKYDNEMPIALVLGVLDIVKKEIVED

>gene\_1082|GeneMark.hmm|62\_aa|-|33064|33252 >NVVL01000050.1 Rickettsiales  
bacterium isolate NORP64 Contig\_source1382A\_23633, whole genome shotgun sequence  
MEVIMCEMPKAFSTKTRKARKPHICCECNHAINPGEEYQYSSGIWDEPERHLLNKGEGNE  
AI

>gene\_1083|GeneMark.hmm|64\_aa|-|33270|33464 >NVVL01000050.1 Rickettsiales  
bacterium isolate NORP64 Contig\_source1382A\_23633, whole genome shotgun sequence  
MECNRGSVCKESDHQVKTLEKAVEWFYGVLEHLPIRVNQVTAHNGRVQITIFDCDGPVI  
HKRW

>gene\_1084|GeneMark.hmm|103\_aa|-|33454|33765 >NVVL01000050.1 Rickettsiales bacterium isolate NORP64 Contig\_source1382A\_23633, whole genome shotgun sequence  
MVITKVVIMANRTKKGAWTKSQIQVLGIDWPARRGWIQDIAGAEISEKNRVLFELKLPVK  
KVPVDLAKSSYSSVMARIRDLTDQQISNLIRSLETEKWYRNGM

>gene\_1085|GeneMark.hmm|27\_aa|-|34272|34355 >NVVL01000050.1 Rickettsiales bacterium isolate NORP64 Contig\_source1382A\_23633, whole genome shotgun sequence  
MVVIIICAYCGLEAEKTEGEKKEGEKRRK

>gene\_1086|GeneMark.hmm|66\_aa|-|34365|34565 >NVVL01000050.1 Rickettsiales bacterium isolate NORP64 Contig\_source1382A\_23633, whole genome shotgun sequence  
MNKRQVGFVNIGLIFIVAVGGNVIAN TKLESQRKLLNCIYAKPTYLDNQVNYCENLLK  
TKWVVE

>gene\_1087|GeneMark.hmm|188\_aa|-|34562|35128 >NVVL01000050.1 Rickettsiales bacterium isolate NORP64 Contig\_source1382A\_23633, whole genome shotgun sequence  
MAYSDYGGYAYRNNARVIERSDAIFTEEGLKSTPGQWPGFSFPEGRRGRSHHVILGDGPV  
HIGMNKQSSQSVYLHGETFDIDPLIARHPNTNTKWIGDNGEEHSYVDHESLLNTTVVEV  
ILEGHKIEIFWADTDNYYMHIRLTQPDDNIWIGWSGYGVGAGLEDCGYGYSTEDIIGASE  
DVWKVKLR

>gene\_1088|GeneMark.hmm|59\_aa|-|35239|35418 >NVVL01000050.1 Rickettsiales bacterium isolate NORP64 Contig\_source1382A\_23633, whole genome shotgun sequence  
MTEQEYILAAANLAKISTAVTIMRGVSPGNNYGISDDDYKLILLILRNSQTRLHELAKTD

>gene\_1089|GeneMark.hmm|88\_aa|-|35415|35681 >NVVL01000050.1 Rickettsiales bacterium isolate NORP64 Contig\_source1382A\_23633, whole genome shotgun sequence  
MEIILIKALKYGYTRIIELDDFQYSRESHIVISKPLKIEFEMLPESDQVNAEVNVLRLDIK  
EKGLADAQVVANKIDEKIQSLLAIEDKR

>gene\_1090|GeneMark.hmm|224\_aa|-|35681|36355 >NVVL01000050.1 Rickettsiales bacterium isolate NORP64 Contig\_source1382A\_23633, whole genome shotgun sequence  
MIINTTGELDLRDKKGVITLED DTVIKCDVPYSVGAINGLHAKGNLDCKGYLYCEGNL  
DCEGNLDCKGNLDCEGYLDCKGYLYCEGNLDCEVNL DCKGNLDCKGYLYCEGYLYCEGYL  
DCEGDYLIITGTLYWSHASMPVLP AKHYINRVLPQKWQREYYQERLGIDISEGCYEEICI  
TVLKQIINLLKQDKWTPTELW MLETLRDSFKKPPVWVSEIRGDK

>gene\_1091|GeneMark.hmm|78\_aa|+|36492|36728 >NVVL01000050.1 Rickettsiales bacterium isolate NORP64 Contig\_source1382A\_23633, whole genome shotgun sequence  
MRKLDKSKGERQTTLIGFRANYTLKDIANQCDVSTVAIHKAVKDINDGVRPSISLYVDKK  
DKIYAFETDIRPVFGFK

>gene\_1092|GeneMark.hmm|128\_aa|+|36753|37139 >NVVL01000050.1 Rickettsiales bacterium isolate NORP64 Contig\_source1382A\_23633, whole genome shotgun sequence  
MNIEDLTIKQVREIQGLTSGGTVSVAANNIGDMVGSKIVIRTY SAGVWFGTLYAKDGEEV  
ILQSARRMWRWWAAESISLSAVAIHGIRCDKSEICEEVGKVW MKAIEIIPCAPASVNSIE

GAENAKAK

>gene\_1093|GeneMark.hmm|65\_aa|+|37123|37317 >NVVL01000050.1 Rickettsiales  
bacterium isolate NORP64 Contig\_source1382A\_23633, whole genome shotgun sequence  
MQKPNKFDGSDGSDGYGYDGS GSDGS GSDGS GSDGYGYDGS GSDGS GSDGYGYDGS GSDGS  
GDGDG

>gene\_1094|GeneMark.hmm|243\_aa|+|409|1140 >NVVL01000051.1 Rickettsiales  
bacterium isolate NORP64 Contig\_source1382A\_23642, whole genome shotgun sequence  
MYS DVAVIIPSR LGSTR LARKSLAQIGDKSLISHVVS KLVKLVKNGLYVATDSEEIAQEA  
EKAGATAIMTDED CPSG SERVFQAF EKIPNHHKINYIINVQGM PPFVDPNAVNDIIKKLK  
TTDYDIVTPVVKVTADVAKNPSNVKVVVDLAGRAMYFSRSLVPYDATEFLYHVGIYGFKR  
DALEKFNLEQSEYEKIEKLEQLRALEHGMKIGICFSSEIPISVDTQEDLNKAREYYSWI  
SET

>gene\_1095|GeneMark.hmm|367\_aa|+|1122|2225 >NVVL01000051.1 Rickettsiales  
bacterium isolate NORP64 Contig\_source1382A\_23642, whole genome shotgun sequence  
MDIRNLIIIATFIICLPFSLAAKTRIKDITGIEGVRDNLVGGQLVGLNGTGDKLKNSP  
FTEKGLTDFLERLGVNVQGAQIKTKNIAAVTVTANLPPFARMGTRINVKVSTIADAKSLN  
GGTLLATPLIGADGTVYAVAQGSIVPEFAPASGGVKT KSKAVETNAYIQNGAIVENEID  
FTFTNMRRIKFLYLPDFGTSVAIAAAINNHLSGNTARALDSATVEIVVPTYRTDDLVEF  
IAEIESLEIKPDYKAKIVINESTGTVVIGDKVHIRPVAIAQGNLVVNVGHLEFDKKGPE  
TDEETRDLVNGFVEERRGRGIRQLEEGANLSDLVAGLNRLGVYPRDIINILHNMKSVGAL  
DAVIEVR

>gene\_1096|GeneMark.hmm|217\_aa|+|2231|2884 >NVVL01000051.1 Rickettsiales  
bacterium isolate NORP64 Contig\_source1382A\_23642, whole genome shotgun sequence  
MAGYFGGGIQNVEKPV EHYKIIDQRKNLSPERARGAGRFDEVMKKAASKLEAPLKAGLEP  
GLEAGPSDKKVLPTLRPQITRSNSAHRSPGHLQTPGSEHLQTSNSKHLQTPEMHRKSS  
LSTGMNPRETDDGTKIALKRLSKEMENQLMGMFVVMIDNARENDPEGGFAEKMFRTPYLH  
EVLKSGADPELGEIGKAIYNNLVRNDRENVESVRAKK

>gene\_1097|GeneMark.hmm|161\_aa|+|2865|3350 >NVVL01000051.1 Rickettsiales  
bacterium isolate NORP64 Contig\_source1382A\_23642, whole genome shotgun sequence  
VLGLKNNINYNKLNQKQLIGDLSRVLKDLIDIARENILLEGGRISQLDAVVAEKFAAL  
EKFNQAEINIEIYKKQGG SFDQRKPDIVQAMELFQKFDKHTRRNEVLIQSNIEVSAKIVE  
MYKESKKAQALRKFYGNKKGKIAVSKNVESIMPSIGLNDTI

>gene\_1098|GeneMark.hmm|916\_aa|+|3362|6112 >NVVL01000051.1 Rickettsiales  
bacterium isolate NORP64 Contig\_source1382A\_23642, whole genome shotgun sequence  
MGNWTTIADTLKNTGRVLEEGPAYNLQRLQDPNARVVRASLGTDNIGSKLLRRTTFRMDR  
PTNPLRERVYMSQVTELENRNTYTEFMDVMQTVIGGGSSQSRLVSVIDDFKQAKILE  
SNSGAAMRAAFVGAENVATVLTQATDSITELRLEADTRLRDSVTSLNSTINALYALNQN  
ILSAQTPLKLYDKRDEL TRELA KAFDIKVS YGGVAKVQSKSSGEMLVSGDSFAQFSYE  
GILT KTDILDHADY PPLKMHHYNQDQKQTNTSIFTDFKSSFLFKGGKWEALIKLRDEIL  
PEAWCCVDTLAQNFSGKINILHNDGSSCPAQGYFKSSGEHRGADGLDGLGAFSIYAVDQN

GNQLRGGAGLLNQVNIDPATILSSVEGKAPTMADLIRELNEKLDLAPSRDRAAMGAILDD  
AGVQIDGQYLLNNVQLLARSQVSGVAPADSVTFELDLQGSSHFGSNIEILGVKTNDVGGG  
NDLALAQNQLPSSFRLEKDTNAASGQFFTLQNSGAGREVTLEIRVIGDNGVVSERGEVSFV  
VNPATPGARVATNNVVAGDFAHPIGTNLSSHSGVARAKLVDSNGAEIDPLSGGSGKLV  
DTNNSYRLVIQGGGFGGKFGFNDLFHYDAHTGFMEVNSDISANVGNLAVGRIQKDNQSD  
SGRMVGDVAASAPMLFGGGAIAAGDVSVNGIDFTFRNAPLPVPADPRDVEDVAGTPLLNL  
VNRINAHPALQNLVQATLNVNTITVTAKAAGTGGNAIAVGTNLVGGATASINGFAPAPGL  
VISTLIGGTDKITINQEFRYDMDDNNLQILEAISNLQGGQAIHVDCQGIVPESFVSLNLA  
TMVTGFFSNYVNDAEKKS DIAVTVLKQTD SAIKGSFGISREEEYIRSVDLAQYMNMLSHI  
LGQMQQIEKTILDNIK

>gene\_1099|GeneMark.hmm|316\_aa|+|6144|7094 >NVVL01000051.1 Rickettsiales  
bacterium isolate NORP64 Contig\_source1382A\_23642, whole genome shotgun sequence  
MALSITTTSSILESKPIRKGEVARLTSQLDDAMASITNPDFSSRAKLDASGLNRLYDDA  
QRILAANGNKISAQVISVKLENENRGLAEFNAALVAFERDMGEMSDHAGTDAEKADRAL  
EKMSLVLRKDPGGRYIFGGSTPYIDPLSKLDNNGVRVAIDLKASTSLIGGQMSRNYSDT  
SPNETVVTVSAFHEVKEGFLHPEMDAIYKTIGYINMVKDQGFTANQRDAAQLDARQARGA  
AAMAIGLEEKKVEASLYVNDSEINSADSKNNYLFSSDLVESTGRMQSLMHSVQANISLDG  
AKTKIFDNLMDRMRLH

>gene\_1100|GeneMark.hmm|564\_aa|-|7116|8810 >NVVL01000051.1 Rickettsiales  
bacterium isolate NORP64 Contig\_source1382A\_23642, whole genome shotgun sequence  
MSSLKREGSEIDDAPGAKRVKLG PAMEPKTTIGVKRERSEEDTRPDSNGSAPPAEVKRAK  
LESTACVTQPALLTGNPLTQVETKVFDAQHLSP EEIFTSRFHIPSEAAA PYTHDDL SAL  
KERKTSKTRQESYLENLPT EYNLKDVLKALGENNFAKGLVQLPVSSQKWL VKKYLSGENE  
LNAAIMELDNNNFSTGFGKLRASIQT VILSQYTDTESLRDFILKLGNNDF AAGFEALRRP  
AKAPIIKLYATKTKLNELVDLVSEESLHTAFTQLSDTNKKNLVGSDFA SELCDHLPTKCM  
ARMLCYMLPNAQKALLTNVLALD TDLRLELMSCSNYFMLQTDHTETALIDEI IQRYL DY  
NNLDVFLKIPLSLFRGLQPKVQILVIKIYFEEDKLH SLLFHL CVPGFSNKKQKEKAKMLE  
EYLDCSAPDKLSYPLTPAFINMSEETKTAVIKACLEYGEFN LLLLQPEYSLATLATLGN  
HFVSTKDAILGLTPEDP TSRNQIPEDLCRLIVDFTYSEVAIPQSDDSAKYLPPSAIIAYL  
QSLETPDTLPPVYLAGDATLMEID

>gene\_1101|GeneMark.hmm|164\_aa|-|8953|9447 >NVVL01000051.1 Rickettsiales  
bacterium isolate NORP64 Contig\_source1382A\_23642, whole genome shotgun sequence  
MTYYSYIQISVGRVLLVSDGNTLGVVYTGQRYFPEIKPEWEEKSDLQLFIKTEQQLIAY  
LAGEIGFDLPCKLEGSELQEHAWRAIGQVRRGETISYKDLASRTPYMPAIRAIASAVGQ  
NPISIIVCHRIVRHDDSLGGYAAGLEAKQRLLDLERKPV RGK

>gene\_1102|GeneMark.hmm|247\_aa|+|9850|10593 >NVVL01000051.1 Rickettsiales  
bacterium isolate NORP64 Contig\_source1382A\_23642, whole genome shotgun sequence  
MLKTFACKYMAFTLLFITALPLSSNAASASITRHDSYLD EDSYFFDSEGAKVFLERYEG  
STVLLVFWATWCGACVNEIPVLDNLQKDFRKL PFKVIAVSEDYHGVQAVQKFFEEKEIRH  
LEIFHDYQNQFFKALSISLPTALLIDANGKMKTRFKGRIKWHDEKIRAMILSEIAGNPE  
TPHNTYKPRELNMQVRPTPPANQKVPKQVAPAGQEKQSAPMRQAAPAKQIDNKEVKKNE  
QKSTKSK

>gene\_1103|GeneMark.hmm|311\_aa|+|10565|11500 >NVVL01000051.1 Rickettsiales bacterium isolate NORP64 Contig\_source1382A\_23642, whole genome shotgun sequence  
MSKKALNQSNTITDTRPILSRTAPTRLEQVLMALPFGFGKSQPVVAVLRLEGVIGKGGGA  
CRSGLNFGALNKLEKTFKTDLSLDAVCLVINSPPGGSPVQSELIASRITSLAKEKDIPVYS  
FVEDVAASGGYWLACAGDKIYASKSSIIGSIGVISSSFQDAIAKLGIERRVYTEGKTK  
SVLDPFQPAKTGDVKIHKLQKEIHNHFIDTVRTRRGKLTQSDDLLFNGEFWCGQTALD  
YGLIDGIDDLYSFIQTKYGDNVKIEYIENKTSWFKKKLGMHKIAKEFAQDLTETVLDSAE  
NRLIQSKFDLK

>gene\_1104|GeneMark.hmm|232\_aa|+|11511|12209 >NVVL01000051.1 Rickettsiales bacterium isolate NORP64 Contig\_source1382A\_23642, whole genome shotgun sequence  
MSNFRASILTIFPEMFPGTLGHSLAGAAALRGDWLLDVINIRDFGLTKHKNVDDTMCGGG  
HGMVMRPDVLGAALDKALEESPGAKIYPSPRGIPLTQDVSKQISLEKNIILCGRFEGI  
DERVIDEYANANQISVGDYVLSGGELAAMTILDSVVRLLPGVLANQETLKEESFEVEEEGL  
KLIEHPLYTKPSVWRGRGVPEILLSGNHAAIEWRKAKSIQITKRRQRNLLK

>gene\_1105|GeneMark.hmm|131\_aa|+|12234|12629 >NVVL01000051.1 Rickettsiales bacterium isolate NORP64 Contig\_source1382A\_23642, whole genome shotgun sequence  
MTNLIDQFEKNQIEKLTANKEIPTFRAGDTRVSVRVIDGTTERLQSYEGVVIKRNNGI  
TSSFLVRKVSHGEGVERRFMTYSPIVAKIDVIKRGIVRAKLFYLRLESGKAARIKERKT  
YAPAAQKKKTA

>gene\_1106|GeneMark.hmm|190\_aa|+|13125|13697 >NVVL01000051.1 Rickettsiales bacterium isolate NORP64 Contig\_source1382A\_23642, whole genome shotgun sequence  
MRVDSSDDKLFWSYFESIKEVLENKRGNDDFVYNDFMMNLDLADKADVNIPLATKLLC  
QPFFVSTIIKQVLKTTCSQHVVHPSVEETSSSSDANLKPDDATITLEMRTNALAADAPVE  
LDDLHPVKRTHGANDTPRSIADDSETLDEVSKADQASSQLRFVLRQLQGGDVEVSGEGSS  
TGFTVEGDAS

>gene\_1107|GeneMark.hmm|101\_aa|-|13858|14163 >NVVL01000051.1 Rickettsiales bacterium isolate NORP64 Contig\_source1382A\_23642, whole genome shotgun sequence  
MSKQGSNGT SEREETLSSRFRAWMKAERANSAQSIFELHKLEAETQIILKEIHSTQDKIE  
RLQDEIEWLHGGIEGNLPRQSIHWMELSGESTRSMDSG

>gene\_1108|GeneMark.hmm|372\_aa|+|14649|15767 >NVVL01000051.1 Rickettsiales bacterium isolate NORP64 Contig\_source1382A\_23642, whole genome shotgun sequence  
MEPITATTITIKTRSAVKTVPVKTVPVKTVFAAEIDIKNDLAARLTPVLSQIFLSFILF  
LFALVASNTAFAPRKKLIAITQIVEHPSLEQAKRGILDELKNNGYEIGVNLKVIKSA  
QGSIAN SAMIAKKFVSLSPDAIVAISTPSAQSVLKIARKAGLPVVFSSVTDPAAGLVKD  
LSSPVNGVTGAMDYPLIDEGVALIQTLTPKAKTIGFLYNVGEANSVKT VNLMMKKAMDGKF  
KYIDAQLANSNQIVQAVSALVGRVDVAVYIPSDNMVFSAMPKLIQLSRKHKLPIFSSDPDS  
VRSGVVACIGYSQYAVGKVAGKLLVRVLAGEREIAIEKPSKAEIFVNKKSAYIMNIEIPS  
EILGIKTNIVGK

>gene\_1109|GeneMark.hmm|304\_aa|+|15853|16767 >NVVL01000051.1 Rickettsiales bacterium isolate NORP64 Contig\_source1382A\_23642, whole genome shotgun sequence  
MMFVCVNVFCYANIASAEKILIAVNQFVSHVALDKANSGLKKALDRGILPDRARMIFG

NSQGNITNSVQISKHHASLEPAFMVSIQTSAQTGLKAKSGKTILGFLAVTDPAAANLEQ  
KQVIGVTDNPPIRELIDITLQVPELKTGVVISNAGEVNSQKVIENLEKILAGHNIALKK  
AVITNPSDIKAAMNKLKAGSVDLIYIPQDNSVVSALSCHARLSNSLNIPLIANDPTLSASG  
VMIALGANYFSSGMQLGNMIADLIEGKGVQRQNIQGSDDKELKINHKIAKMLGVSVPKNIK  
EGDK

>gene\_1110|GeneMark.hmm|286\_aa|+|16768|17628 >NVVL01000051.1 Rickettsiales  
bacterium isolate NORP64 Contig\_source1382A\_23642, whole genome shotgun sequence  
MNQLQLLGAMEIGLIYALVAIGVYITFKIIDFPDLTVDGSFTLGA AVSSAMIFAGYDPYF  
STLMAIIAGGLAGMLTGYNVRWDILGLLAGILTMTALYSINLRIMGRPNIAMIDSETVF  
GSWSIIVISLIIVIVAILALTRFFASEFGLAIRAVGINPKVSTSYGIRVGAMKVIALLGLS  
NAIVALAGSLFAQSQGFADISMG TGTIIVGLASVIIGEALVHPERVVWVSLVTCTIGSILY  
RIAIAFALNAHDIGLEASDLNLITALLVAVTMIATR WKKKNTVRVI

>gene\_1111|GeneMark.hmm|260\_aa|+|17595|18377 >NVVL01000051.1 Rickettsiales  
bacterium isolate NORP64 Contig\_source1382A\_23642, whole genome shotgun sequence  
MEEKKYGQGNMIELKGDVIFNKGT KLENHVLKSIDLK VETGEFITVIGGNGAGKSTLMN  
VLSGNVAPASGQIFIDNLDVTRMPTEKRSSMVS RVFQDPMIGTFSDLTIEENMSIAIKRG  
KCRGLAMSSNEPLREQFKAALADV GIGLEERLSDKVASLSGGQRQALSLIMATMIGSKIL  
LLEHTAALDPKIAKKIMQLTDKIVKRDNL TALMITHSMSQALEYGNRTIMMYHGS IARD  
MHGADRSEL SAADLVKYFDL

>gene\_1112|GeneMark.hmm|500\_aa|+|18389|19891 >NVVL01000051.1 Rickettsiales  
bacterium isolate NORP64 Contig\_source1382A\_23642, whole genome shotgun sequence  
MTASTKDYDNLETELEQITHLQNLFKIAHWDSSTMLASGSAPS RQKEIATLLSVIHEKST  
SDKISDLINGSLGEFEHLNDWQRSNL ANAKKTYDMQVCVTSELQHEYN IASAESEFVWRE  
ARLQNDFKKLEPYLDRVFSVRNIASIQA KKLRRTPLDVLIDSYPDRTSADVRSVFDVL  
KAELPPLIERVMAKQESEKVIPLSETI SEETQKAIGLRVMGAMGFD MNLGRLDKSVHPFC  
IGSNDDL RITTRYDEKNFLSSLFGVIHETGHALYLQNLPAEYRSQPVG DYKGM AFHESQS  
LIMENQVGT SRAFMEFLAKMLKDEF SFGPEYSAENLYKLVTRVKPSFIRVEADEATYPL  
HVIMRFEIEEAIINGNLKAMDLPDIWNS KMEEYLGIVPSSDREGCLQDVHWPSGMVGYFP  
SYTNGALIASMLMKS AKEKYPEIDSELSTGNFTSLNRYLTDNLRKYGCSKNSADLLEAST  
GHRSIAPGIFIDYLGKYLQ

>gene\_1113|GeneMark.hmm|110\_aa|+|20337|20669 >NVVL01000051.1 Rickettsiales  
bacterium isolate NORP64 Contig\_source1382A\_23642, whole genome shotgun sequence  
MYGVIKFQSPFEK LKKYPCSNEVKLYKATILQAVIDASNIS SSVISRKNEIEAKHWIFGN  
GAHFQEICYLADMEPSFIKITRYVIKHQAIRKSQLFLSVLEGKVPKEDC

>gene\_1114|GeneMark.hmm|154\_aa|+|21064|21528 >NVVL01000051.1 Rickettsiales  
bacterium isolate NORP64 Contig\_source1382A\_23642, whole genome shotgun sequence  
MNIFLSKYLNKIDKKG RVSVPAGYRSTLLKEDFN GVIYPSFKNNCIEACSMSRLEELSK  
IIQNLDPYSEERDAFETIVLGEAVQLPFDNEGRVILPAYLMEQVGISGQACFVGKGVVFE  
IWHPPSFDKHLKSAREIAKGNK LILKNNQNNNVS

>gene\_1115|GeneMark.hmm|331\_aa|+|21532|22527 >NVVL01000051.1 Rickettsiales  
bacterium isolate NORP64 Contig\_source1382A\_23642, whole genome shotgun sequence



MNKKTDLQQQATSDSSSKNENISPHCSVLLAEVLEYMQIKDGGHYLDCTFGAGGYTKAML  
AQAECVTVGLDQDGNVEKFADQVNEKFGNRKFVQTNFAEAKAKLGGQKFDGIVLDLGV  
SMQIDSAERGFDFMRDGHLDMRMGSAIDAAEFIESASEEEIANVIYKYGEEVQSRQIAK  
KIVECRATEPIDTTLKLAQIIRDAMHYRKGKIDPATKSFQAIRIYINKELESLEKFLDQL  
EDMLVPGGRILVVSFHSLEDSIVKAFFKEYSAPKVARSKYAKTPEIIEDGKWLKVVITRS  
VTPGREEVLRNPRSRSSRLRVAEKIGGADVT

>gene\_1116|GeneMark.hmm|125\_aa|+|22517|22894 >NVVL01000051.1 Rickettsiales  
bacterium isolate NORP64 Contig\_source1382A\_23642, whole genome shotgun sequence  
MLLNRVPVYIILCLITVCTLFSIKSNVIRAEELSEVKNQLQSERDTIHVLKAEAYL  
SSPERLQKLNNVYLKLDTKVSQMISDPLKQAEPVYASNAPKARVRWNYKRGASKYLIR  
VSSKK

>gene\_1117|GeneMark.hmm|616\_aa|+|22938|24788 >NVVL01000051.1 Rickettsiales  
bacterium isolate NORP64 Contig\_source1382A\_23642, whole genome shotgun sequence  
MIFSLIKLRKLRRIIVASWAMFCVLYPRIILLKLRRAALFRIKKLSNSLHEFKWRKLYRS  
LYIWDLSYSQSRMRMHIVIGVFAFVFFVISARLIMVATSEYTSYRRANEVASGSRLDIVD  
RNNLLAVNLP GASLYANPRKIIDQLDAANKLSRLIPELKKKELLRLFKKNKSFVWIKRD  
ISPGEHEKIYNLGIAGLGFEREQKRIYPYGNLLSHVVGYYVGRDLNGLAGLEKYFEKFLTG  
QKEKEDRRKLGSSLSIDVRVQNILSAEIDKGIKFSKAGASGIIVDPNNGEVIAMVSK  
PDFNPHHPGDARPKQLFNTVTQGVYEMGSGMKALTVAIGLDSGTSMHDVYDLSYMKVGG  
KVIKDT HQMKGWHSVPHIFMKSSNIGVTQIMLEIGREKLSDYFRKIGFLDRLQIELPERA  
RPLFQPF SRWSDLSTTMSYGYGFSEPAHF MQAMIPVMNGGIIYPLTLRRDEGEVLTG  
ERVFKESTSNSMRQLMRLTVARGTGKKAEVKGYVVGKGTAYIAHAGKYDKTRRISSFF  
GVMPASSPKYMIYVVYNEPKGIKETFGWAGGGWTGAPTVGAVLSRMAALYGLSKLKDKNK  
EVQELNNVEYKIENET

>gene\_1118|GeneMark.hmm|508\_aa|+|24778|26304 >NVVL01000051.1 Rickettsiales  
bacterium isolate NORP64 Contig\_source1382A\_23642, whole genome shotgun sequence  
MKLKVQLQKYFSDKKIKRISFDSRLVKPGDAFFAIKGEFCFNGNDYIDNALALGASVVFTD  
DESQKDNKIVHIEDARRGLAMAAGMLYSQMPENIIAVTGTNGKSSVVSYPVHQIFTMLGKS  
SASMGT LGVESTEELSKNAKEISSGMTSSDPLSFRKTL SLLARAGVSYLALEASSHGLHQ  
FRLGEVKANGAAFTSFSQDHLEYHHTMEEYLLAKMMLFTEHLADGCEAVINSEMESAEFI  
GKFLDERDIPYSSVGANGDLQIKNCQQSIGGQRVNF SFLGEDYSFSTEIIGSFQATNILI  
AAKL VYNMGIEFGLIAPLLSKIKPVCGR LQRITEKNAEYQVFVDYAHTPDALEKSLIELE  
KLKQGQGGQLYVFGCGGDRDSVKR PIMGKIATDIADYVVITDDNPRDENA EKIRGEILKG  
LNYREAGNKEPGNKEETS KKFNGKEADKLKEIADRKLAINETVAKLKQNDILLIAGKGHE  
DYQIIGDIVDFSDIDVAFAAIRNRNMV

>gene\_1119|GeneMark.hmm|461\_aa|+|26310|27695 >NVVL01000051.1 Rickettsiales  
bacterium isolate NORP64 Contig\_source1382A\_23642, whole genome shotgun sequence  
MTCWNSKQLEEALGIELSFKAKYNGIKFNSQDVKKGDLFIALKGTRDGHQFVDDAFSRGA  
VAAIVSKISPGVDLDKIIQVEDTLAALHMLASYKRAHSKAKFIAITGSEGKTSTKEAIRM  
MLTPY GKYANYGTFNHLGVSLTLASMPDDAEYVIVEMGMNARSEILELSKLAKPDI AV  
ITSISEGHIGFFESLQDIVDAKCEIFESLDKEHGVGILNHDIPTYENCINNKKIGLKNI  
QTFGKSEEAVTRFVSYEELSDSVRLKYMIADDEFEVAMHMLPMHLAENFAAAFAVVRAL  
GLDPEAASDAISSFQPIIGRGLVAVKDKKSYRIICDYNNANPNLSLKASLKYLEQIASD

SKIAVLSDMLELGAKELHESIVPYIIESGAGKVFLVGPAMARIKDKIPSSIEVRCYKD  
TQHIAEIDQHLHSELILIKGSRFALEEVAKHLGVKDAL

>gene\_1120|GeneMark.hmm|362\_aa|+|27685|28773 >NVVL01000051.1 Rickettsiales  
bacterium isolate NORP64 Contig\_source1382A\_23642, whole genome shotgun sequence  
MLYNILASYAGTCDIANLFAYISSRSILATLLSASICFMIAPSLISYLRKVQKHGQPIRK  
DGPETHFSKAGTPTMGGVMVLFSAITSTLLLADLYNPYIWWVCLFVMLSFGALGFMDDYTK  
LSRNNHHGVSGRVKLAIQMIVSMIAFIVVQRYTEPEYATQLTFPFKSLFLDLGYFYLPF  
AMFVIVGSSNAMNLTGDLGDLAIGTGAIAISSFALISYLVGSSVYAESLQIIHIPEAGEL  
AVLCGAIIGSSIGFLWYNSYPAQIFMGDTGSLALGGFLIISVITKHELALSIIIGGVLVI  
ETLSVIIQVYFKMSGGKRVFLMAPLHHHFEEKGWPEKVVIRFWILALICALVGLSSLK  
LG

>gene\_1121|GeneMark.hmm|225\_aa|+|28777|29454 >NVVL01000051.1 Rickettsiales  
bacterium isolate NORP64 Contig\_source1382A\_23642, whole genome shotgun sequence  
MLGDNPKRPPVSGDGNLFLVKKIFKTLQEGEVHAGVPAIFIRLGGCNLACSFCDTEFEDY  
HSLDLSKILAEISSRLNDEGRSVIDLVVITGGEPFRQQISPLCQGLLALGVKVIETNG  
TIYREIPEDAIEICSPKVAGGKYLQVRREMLPRVTAFAKFLISCAAGGYALVPELGQREYD  
IPVFVQPMDEYNDEVNLRNKQLAIDIAINNGYRLSYQLHKVLGIE

>gene\_1122|GeneMark.hmm|228\_aa|+|29564|30250 >NVVL01000051.1 Rickettsiales  
bacterium isolate NORP64 Contig\_source1382A\_23642, whole genome shotgun sequence  
MKKAVILVSGGLDSSVLAIVKNAGFEIYAI SFNYGQNHLIEIEKIKQFIKNYDVAEHKI  
VNLDLSAFSTALINKSVDVPHKEKVGDIGSDVPVTVYVPARNTIFMSYALGYAEVIGAQD  
IFIGAHLDRENYPDCRVEYLQSFEMANLATKAGTEGAKISIHAPLIDMEKTEVVATGL  
KLGVDYSGTISCYDPSAAESCGACNAACLIRLEAFRGNNKQDPPIYVR

>gene\_1123|GeneMark.hmm|184\_aa|+|30254|30808 >NVVL01000051.1 Rickettsiales  
bacterium isolate NORP64 Contig\_source1382A\_23642, whole genome shotgun sequence  
VNIKYFFGQFPVLDLGSIVLRRMTEDDASHYMA YMNCPEMHDVLT KDNMPASLAKAKEEM  
KYWSGLFDSKRSLYWAIAWKETDQIIGSIGFNHISFPHSRAEISYDLDPEYWGKGLMLKA  
INGVLKFA DGGLELVRIQGTVLISNERSIKVLDRCGFKREGVLKKEYEIVAGEYRDYYMYA  
RVVE

>gene\_1124|GeneMark.hmm|163\_aa|-|30940|31431 >NVVL01000051.1 Rickettsiales  
bacterium isolate NORP64 Contig\_source1382A\_23642, whole genome shotgun sequence  
LSIQKKQLKQKALKGDLEMNNNTNPFQDKMSFMNNDNLNQT MQNMPNIDFSAMTDMMKNN  
NDTATSSAQVATDGIQSILKKNSESLQKDTNDMCSSMKDAISAGDVSQITLCQQKFMKSA  
IDNHVKNTKDILDISAKSILDSMNLFHNVVNDNVNKVSAKAKK

>gene\_1125|GeneMark.hmm|44\_aa|-|31535|31669 >NVVL01000051.1 Rickettsiales  
bacterium isolate NORP64 Contig\_source1382A\_23642, whole genome shotgun sequence  
LDQKPQIIELFYKYMKNLSINQTTTIVLESNANTELKSNTNAD

>gene\_1126|GeneMark.hmm|132\_aa|+|31782|32180 >NVVL01000051.1 Rickettsiales  
bacterium isolate NORP64 Contig\_source1382A\_23642, whole genome shotgun sequence  
MDKIISVCIEIACSHCGNMLCYEYVDKTLIDTRIMRIIAIKRLKEFWESGYADSEQPLKV

WYQIFRQGSFDNPNKIKSLFSSCSFVGNNRVVFNISGNKYRLVIHIRYDLQIVYIRFIGT  
HAQYDKINVGEV

>gene\_1127|GeneMark.hmm|123\_aa|+|32183|32554 >NVVL01000051.1 Rickettsiales  
bacterium isolate NORP64 Contig\_source1382A\_23642, whole genome shotgun sequence  
MELHTIKTEKDYEKALNSIDLLDSPAQAEQLELLSLLVEDYENKHYKIDVDPDISA  
IKFRAEQLGLTRKDLEKSIGSRGRVSEILNRKRSLLVMIRKHLHKNLNIPAEILSIDIKR  
KSA

>gene\_1128|GeneMark.hmm|70\_aa|-|32887|33099 >NVVL01000051.1 Rickettsiales  
bacterium isolate NORP64 Contig\_source1382A\_23642, whole genome shotgun sequence  
MTQENIILAGMNSAARKAGEAVKESSSQYIEDNVIKGNYSREEYNQLHKLVIKLSKE  
VAELKSYKAT

>gene\_1129|GeneMark.hmm|104\_aa|-|33109|33423 >NVVL01000051.1 Rickettsiales  
bacterium isolate NORP64 Contig\_source1382A\_23642, whole genome shotgun sequence  
MESEYSMIYLNFKILNELMSRETTIKNKLAILRPHILEVIDESTQHGHSGNPDGAGESH  
FSVKIASIELDDLTRIEKHRVINELLSREFASGLHALSIEIIPS

>gene\_1130|GeneMark.hmm|408\_aa|+|33493|34719 >NVVL01000051.1 Rickettsiales  
bacterium isolate NORP64 Contig\_source1382A\_23642, whole genome shotgun sequence  
MAYAEKVAKILQREIKEAQSGILLQVLLLNMDENILIEDTTPLIKAFYDRISQACKQVP  
DHKIVKTTDPAKVYIVLGKNTKDIKIAHSIYAHMQEYTDSDFPETYLRCSVGSIKFRQT  
SEDSNGKVIIEFSASKLLSLEYSMQRSGHPYHCYEDHPVDIEKIRNGNINLNQLKKSIS  
EGRVKFMYQPVIDRISGDIEYECLLRAPDIHNKFSAGEVIADAESKGLINIIFAVIE  
MVIGELSRDKDVTLSVNISNMGVLDKNLLKRIEELLQKHDVANRLIIEITETSLNRDFAN  
TQKFINVLHGYGCLFAIDDFGSGFTSFQMLGLSIDIIKIDGSYIRDMLVNNHSAFVKA  
LVGLAGELGIKTVAEFVENNKVAQLLVELKIDAMQGNFFAEAMKNRIS

>gene\_1131|GeneMark.hmm|445\_aa|+|34720|36057 >NVVL01000051.1 Rickettsiales  
bacterium isolate NORP64 Contig\_source1382A\_23642, whole genome shotgun sequence  
MSFTTYLDALNSKIEDIKPVKLSGRVSVKGLVIEARGISGFVSGSRCRIKNNLQDSYI  
LCEVVGFDVDSVLLMPFEDTEGVASGAEIEIDQHENAIPDDKWLGRVINAFAPIDELG  
PLKSGQKAYPLKTSPPPHKRQRIGKKIDLGVKAIDSFVSCCYGQRMGIFAGSGVGKSVL  
ISMLTKYADTDVKVIGLIGERGREAKEFIEEYLGEEGLKAVVILATGNESALLRKRAAY  
VTMAIAEYFRDQGKEVLCIMDSVTRFAMAQREIGLAVGEPPTTKGYTPSVFSELPKLLER  
AGPGLESANITGLFTVLVEGDDHNEPISDAVRGILDGHIVLDRAIAERGRFPAVDVLRV  
SRTLPRCNDLENKQITYARRMLATYHDMAEMIRLGAYKQGTREVDLSIGYFEQJEEFL  
NQKPDESCSMEESYKRLGAILNITE

>gene\_1132|GeneMark.hmm|147\_aa|+|36095|36538 >NVVL01000051.1 Rickettsiales  
bacterium isolate NORP64 Contig\_source1382A\_23642, whole genome shotgun sequence  
MGLEKSNKSLKPLKTLVKNLKNKMDTLLKEIKYRDSEKDRLEKKKQIEDESQAEIARYS  
GTKYAYMLDNYMQNARKSIKIVDAHIEQVVQILEKLREVLETQYSELKKFEIILEMKIKQ  
QQEQEKIAETKAMDEFNSNKFIYEKEG

>gene\_1133|GeneMark.hmm|131\_aa|+|1|396 >NVVL0100052.1 Rickettsiales  
bacterium isolate NORP64 Contig\_source1382A\_23653, whole genome shotgun sequence  
DRVEKAFLERKKMQLYAAEEHHLVFM DPESFEQLLLDKGLMGDKLPLLADGMNV DVEFYQ  
EEPLSIKLPATIIVDVEMTDPVIKGSTVTSSYPAILTNGLRVMVPPYLVSGEKIVIKTE  
DLTFVERAKKC

>gene\_1134|GeneMark.hmm|247\_aa|+|390|1133 >NVVL0100052.1 Rickettsiales  
bacterium isolate NORP64 Contig\_source1382A\_23653, whole genome shotgun sequence  
MLGDTGLVVDAMRKASRFLQRDYFELEHLQASGSKTSSFCQKACTKVMHTLHDELKRYQ  
TIIFSSDEVKSTNFSGKAALVETLDGLGNLERALPFFAIMVTIISNKDGEIVADKAIINL  
PALNEIYYAEKGRGAWVERHSSNISGASRVVSGAQSEQDAVVSGGREQM GKAFKSFKNV  
RFFDSYTYALTLLVSGKIDALMLETRMISLAGIQLLLLEAGGSTHEKDGLLIASNFKLHD  
KIKQLLL

>gene\_1135|GeneMark.hmm|187\_aa|+|1191|1754 >NVVL0100052.1 Rickettsiales  
bacterium isolate NORP64 Contig\_source1382A\_23653, whole genome shotgun sequence  
MISAKDNSAEHMKKFTINCFNGQMAPFAIYIGTPEKVHHPLHFQADWLMKVRGGTIPAD  
VMDAVTQLNELAKKNSVPLEELCVYALGSESGNVLKSELEPAEASLPKKPSPELKPDAEA  
LNKPKSQEPQAKEQSESKEPPDKAPTPEKHETNTHNQRNAEDAEDMSSEGGHVEDDS  
SDSGKLK

>gene\_1136|GeneMark.hmm|391\_aa|+|1946|3121 >NVVL0100052.1 Rickettsiales  
bacterium isolate NORP64 Contig\_source1382A\_23653, whole genome shotgun sequence  
MSRNLAVSRGVLREQRIAKVQLLIDAIRGVDIDKVT EILRQDARIINGVGSEGHTPLVLA  
IMVGSSELINTLINHGANPTLIVGGMIPLVCAIEKGNIELINTLIYHGADPTLVVGSFT  
PLLYAIEVDSSIELIKTLM DNGAKPNQVVDIFTPLRCAIGKGSIELITMLIDHEANINLV  
TGSFTPLSYAIEVDSSIELIKTLM DNGANPNQVVDIFTPLGCAIRKGSIELIIMLIDHGA  
NPNLVAGSFTPLLHAIGVDSCIELITLLDRGANPNQVVG SFTPLLQVAVGEGDNIELVK  
GLLAYDANVFLTISFLGLLDPSKPVVKSLLCHASYLQLEAVTALYPAVLEDLLKSVLL  
STLPEGASSNDIALIEPPLAGDAGAEEGTDF

>gene\_1137|GeneMark.hmm|609\_aa|+|3209|5038 >NVVL0100052.1 Rickettsiales  
bacterium isolate NORP64 Contig\_source1382A\_23653, whole genome shotgun sequence  
MKPVHANS�TLVREIYGYTEFRGDQGEIINHIDGNNTFVLMPTGGGKSLCYQIPSMCRP  
GVGIVISPLIALMRDQVSALSQ LGVSA AAINSTQSYAEISATIEKIENNQLD LLYIAPER  
LLSEEFMGIKDAKIALFAIDEAHCVSQWGHDFRPHYTQLEILA EKFPSPRIALTATAD  
APTRHDIIERLRLTNCRSFVAGFDRPNISYSITPKNNPKQLLDFINGRRRENSGIYCL  
SRKMCEEVAKFLVDNGYDALVYHAGMQSNQRAQNQDRFLKGEGVIMVATIAFGMGIDKPD  
VRFVVMNMPKNI ECYYQETGRAGR DGLASDALMFYGMQDSAMQRSFIENG DAPDNQKRI  
EHQKLNALLGLCEASRCRRQILLEYFGDSADACGNDCI LNPPKTFDGTIAAQKAISCVY  
RTDQRFVGYLIDILLGKINDRMVNF RHDKISVFGIGTEH SKQEWQSIFRQLVASNLLKV  
DIVGHGSILITEHGRKFLKNKETIALCEYKTQPKAKKASTRAASKAVDVIFTNDDQRELY  
QSLKVKRELAQQHNVPYVIFQDKALKEMTMTKPSSHDEFKQINGVGASKLEKYADIFI  
EVINIHDSE

>gene\_1138|GeneMark.hmm|88\_aa|-|5406|5672 >NVVL0100052.1 Rickettsiales  
bacterium isolate NORP64 Contig\_source1382A\_23653, whole genome shotgun sequence

MANTSLTGIIHWEKFIKNEIVGGRYASASEVVRICALRTLLEEKAVNTHLELLRHALIQGEL  
SGDAGELNMQTIIRREAKSELSPNLSNDA

>gene\_1139|GeneMark.hmm|955\_aa|+|6027|8894 >NVVL01000052.1 Rickettsiales  
bacterium isolate NORP64 Contig\_source1382A\_23653, whole genome shotgun sequence  
MFFGIDIDMAIVVTFVLVATLIVGLKYSNINTIKDYALGGRNFSTAALVATITATWASGS  
GFFTTLSRTYTDGFFYLFATLFMGVQLLLVAFVFPVPRMGEFLGSISVADAMGKLYGKEAR  
VITAIISGAVGVSQVFIQKAFGNIVSYFMGIPSEVSIITSGIIVTIYSSLGGIKAVTIT  
DMLQIFAFCTLPLVIGIMIWNQLYFTDFSLTNAFQASKFDVGYVLDVVGKPKFWEMILLML  
YFMMPNMIPINFQRISIAKNLEQVKKAWAISAGLLIFLKLKSIWIPFLIFNIDENIPANQ  
LLGYIIDNYTYTGLKGLIIVGVAMAMSTADSLMNTGAVLFAHDICGVLKIWQRKELILA  
KIFSFSIGGGAIMLALTEDLGIIILVAQSFYMPPLVTVPLLSILGFRSSSKSVLIGMGA  
GFCTVVLWKISGIKADPIIFGMIANVVFLFGSHYLLGEKGGWVGKDKKEYLDKQKRIRQK  
NKGAFLRWVQEFNFFNLCKRKYSPKDDLYTGFVYVSICTITMYSTQVELLAPNGQIVL  
AIYQIMMVTGTMMAMYPVWPLSIKKIKERVAQTWWNPAIFYMLAFFSTFFVLISEFGQL  
QFVIFTVNTILLILLAGWRLASLMIITGFYGGIEFFKYKIGIDDIDMAIGSPLFVFMYSL  
ILIGALLVIFLQPKQEHLEQTEDKVEDLESEVTTQGTKITTLNKEVGHYSQRVSNQAREI  
ERLGATAQKILNNVNHRLPVGNVMMNFAEMLRDGLDKFSDQLKMISEEVYNNNSNRLSS  
MILNMLDLAVLEAKKIELKKEEVNFSKLVRRARAQNCRDIAQDKKALEFRLNIEDDVMVF  
ADANYICQMIDNLVINAINFSEKGIAINVDREKYFVSFAIRDEGKGPKEIFDIFTPF  
KMGSNMESSAEGRGVGLALCKSVIEAHGGEISAESRNVGALFRVCLPYGEVKKEK

>gene\_1140|GeneMark.hmm|153\_aa|+|9085|9546 >NVVL01000052.1 Rickettsiales  
bacterium isolate NORP64 Contig\_source1382A\_23653, whole genome shotgun sequence  
MHKQELATIIDYLQPLTKEDIDLYVENKRDSSSIEEYKYHATDFIATKLIIEIMPAFEG  
WNSLYPILPAFNSKDLFVKSVMQRHIMKYFTPLAEILYDLQSSNLSIVNLKFKQELLNA  
EENFHKANPEAQNEQIYYDKLCHMLEDAPKLDK

>gene\_1141|GeneMark.hmm|49\_aa|-|9668|9817 >NVVL01000052.1 Rickettsiales  
bacterium isolate NORP64 Contig\_source1382A\_23653, whole genome shotgun sequence  
MAVLIISLAVLFVFFDKIIEHYAPNSDFTTFSNEIDTVILALDEQDDAR

>gene\_1142|GeneMark.hmm|331\_aa|-|10074|11069 >NVVL01000052.1 Rickettsiales  
bacterium isolate NORP64 Contig\_source1382A\_23653, whole genome shotgun sequence  
MAKEPTKLDVDPYLDLESEISRLKEMNAVILAHFYQDPDIQELADFGDSLDSKKAEE  
TDADVIVFCGVKFMMAEALILNPSKKVLIPLDKAGCSLEDSKPAPEFKFRDKHPNHISV  
VYINCSEAELKALSDIIVTSSAEKIINSIPEDKEILFAPDKHLGNYLIKKTGRDMTLWDG  
TCVVHENFSERELVRLKTTHEPARIIAHPECPAALLSYADHIGSTSSLLRDVGAHREMDF  
IVLTEPGIIHQMHKIAPSSKFYDVPSLDQAGCTSCSQCPYMRLNSLEKIYACMVNGAPQI  
RLDPEVSKKAKIALDRMIAGKYTPLEALQEG

>gene\_1143|GeneMark.hmm|957\_aa|-|11189|14062 >NVVL01000052.1 Rickettsiales  
bacterium isolate NORP64 Contig\_source1382A\_23653, whole genome shotgun sequence  
MSDLEPEDTLPLSKNILPISIEEEMKNSYMDYAMSVIVSRAIPDVRDGLKPVHRRILYSM  
HEGGYVSSRPHRSARIVGDVIGKYHPHGDSAVYDSLVRMAQDFSLRVPLVDGQGNFGSM  
DGDSAAAMRYTESRLTKISHTLLEDIDKETVDFSPNYDGESEPGVLPAMYPNLLVNGTG  
GIAVGMATNIPPHNLGEVIDAACAYVDNNDIELTELISYIKGPDFPTGGTILGTSGIQSA

YLTGRGSIAFRGKCSIEDHNGREVIVVNEMPYMVNKAKLVEKIAELVREKRIEGISDLRD  
ESNKDGVVVVEVKRDAVADVVLNQIYSYTLQTSFGVIMLALDDGMPKVMNLKEVIGAF  
VRFREVVITKRTIFLLNKARDKAHILLGVRIAVSNIDEVIRIIRAAPNPVAREQLMEKA  
WDCSTITSLIKLVDDRTDISDDGTVHLSETQAKAILEMRLQRLTAMEKDKLEKDLGELTK  
EITDFIDILSSRERLLSILKSELIRVRDEFATPRKTEIIEGNFDKDIEDLIQKEDMVVTV  
THSGYIKRVPLVYRAQRRGGKGRSGLSMRDEDITTQLFIGNTHHTPLFFSNLGQVYSLK  
LYKLPLGNPQSKGRPIVNILPLOSGETIANVMPMPESQEEWDNMHIMFATAKGNIRRNDL  
SDFKKIQANGKIAIRMEDEDDSLVNVMACNEDEHVLIASKLGKAIRFPVNIRVFKSRTSD  
GVRAMRLADKDRVISMTILHGKSSMEEREAYLSIPYEKRLAIAAGDHEFSAQELDVALT  
KEQIIDMADAEEFILTSENGFGKRSSAYLYRITNRGGSGIANMVLSEKTGEVVASMPAN  
MNDLMLITNNGKLIRCKLDSVRITGRSTSGVILFKTDKGEQVVSASLIADSSDEEEDES  
TADESTADESAADESAGAGESGAGESADKSGTGDTNESDGPESDGSEANGSEE

>gene\_1144|GeneMark.hmm|72\_aa|-|14242|14460 >NVVL01000052.1 Rickettsiales  
bacterium isolate NORP64 Contig\_source1382A\_23653, whole genome shotgun sequence  
MLSVRLGQSLNRLNVLSKKTTHRPKSFYVKEALEKYISELEDTFIALNRSLSPNRKFYSS  
KEVLNILQNETP

>gene\_1145|GeneMark.hmm|676\_aa|-|14460|16490 >NVVL01000052.1 Rickettsiales  
bacterium isolate NORP64 Contig\_source1382A\_23653, whole genome shotgun sequence  
MRKLAAIWKTQKLSIIILLFSLSSCGDSTEIPSIEAIFAGGKSDEISSASSAEMAPIGGG  
AIEGGATGETSIGSTSTETTSTAEQSAKIESRTTSTIVPPALLPLTGRGTTGLTENQSKK  
IRDYIVKQTSSNRPIKLLKFKGTNLRGLKLTGVNLSGTDLSGTDLSGIDFRDVEFARVNL  
SGAKLDNVILTGASMQECDFSGVNFTGLSAKGVDFHYSIFRGAVFNKVNLSKALLNEADL  
TNAKFLNCQLDGDVLSKAVMKNVVIDNTNLQKANLSNANLSNAKITNSAFFGVDFRYVDL  
FLATIESCSFESSDLFSIKARKTSFTNTDFTQILEDISFTDSTKFDSSIFDYSSIKNSV  
FDNVTINNCRFNDVSMAYTSFQDVDIQHTEINNPKFSSAKMSRVHMNNVKGRDNYFNKIT  
MDGVKITDSDIRNSVFSNDNGKKISFLNVNLTNTLFDNYNLTDISFKKTSLSGTVFRNSK  
ISKVSFLHSKLEKIAMVNCTLEEVTLNNSRVQRSLFNGVTAIAMLVVNSPSTRNIMINNN  
GLEKIAGSQEITSTAQIAKIKNLSNMNMAYIDLSSMSIRQVDFSNSILLGANLAKASLQN  
SLFVNVDFRYSNLSGTDFSNSTIANSSFLGAKLDNTILKNTKLNLDFTRTFTRDVNFDN  
AEMDNVFGMDAIEAIE

>gene\_1146|GeneMark.hmm|475\_aa|-|16504|17931 >NVVL01000052.1 Rickettsiales  
bacterium isolate NORP64 Contig\_source1382A\_23653, whole genome shotgun sequence  
MALDILIIDDEADIRDLISDILKDEGFTSRVAANSTQAFNAISDKKPRAIILDIWLQGS  
LDGLGILEIVKKQYPLMPIIVISGHGTIETAVNAIKMGAYDYLEKPFTHDKLMIVLKRAC  
ESAKLKRENIDLKSKVIDKTEFIGNTAITSKLMKMEIEKVSPTSGRVMIHGAVGSGKELTA  
RLMHKRSKRASGPFIFNPTSMNPTKIHQELFGSDEKRNNQPLFDKRLSVLEAANNGLTY  
IDEVGDPLPGSQNKLLFLKDQTLMKPDGQSVSLDVRIITSTTKDMKKEIANGRFQDLY  
YRLNVIPLTIPQLAERKEDIPMLVEYFVKQLSKFSGLNEREFSEGAIAALQAYDWPGNVR  
QLRNIVEWTLIMNPLTQNSTGMIKSEMLPQDIISGSVNISKPNNSVDMMMSMPLREAREVF  
ERQYLTAQMNRFNNNISKTSTFVGMERSALHRKLTNLNIHASSKPEIDEFAELEA

>gene\_1147|GeneMark.hmm|645\_aa|-|18174|20111 >NVVL01000052.1 Rickettsiales  
bacterium isolate NORP64 Contig\_source1382A\_23653, whole genome shotgun sequence  
LLESYANTNIYMLTQIWKNLSSYKLSNNAIYALISVISTSLVITLFTYADFFFNPDPL

YILGFLLATLVLILCFSIIVVNNRVSSSTFSFRKGGKRVSKLRKRIII AFSIGATLPTII  
IAVFSTYFFNFGIEAWFSQKVS NVLDQSIIVGESYIEEHVMQLRETAISVSN DLSEMCYD  
LIRDPEFSKVINAQAEMRSLDEAMVFQKDTQTILAQTKLSFALSFTTIPVHLITRADKG  
GIVPIPAGSTKIRALIKLRGFNDAYLLIGRFVDSKIIDHIDKTNGAAEEYFRVKRQISEL  
QIKFSMVFIIVSLILLVAATI WGRAFAERIVKPIRELVIAAERVKNGDLSTQVPM EGLKK  
DEIKVLSAAFNQMVNQINRQQKDLVIAQRALAWSDVARRVAHEIKNPLTPIQLSADRLLK  
KFAGEVSDPESFTKYVKNII RHSNDIKSIVSEFVDFARLPTPSFAKCKIVSMISNLVESR  
KLINDLISYSFVSDTEEFELVCDISQINRVMV NLLQNAEEAFGEQE KALGERTSGPKEQT  
FQLEGQTSKSEEQKTD MQISVTL SASEDQFLIIDDNGAGFSDKLLTSAKEAYVTTKSN G  
TGLGLAIVDRIVIDHFGEVALSNNT HGGARITLTF SVKELTLK LK

>gene\_1148|GeneMark.hmm|90\_aa|-|20135|20407 >NVVL01000052.1 Rickettsiales  
bacterium isolate NORP64 Contig\_source1382A\_23653, whole genome shotgun sequence  
MQNNIKNNDKTLTSAIEARMDEFFAMHEGDCPESGLYERVITQVEKILIKKTIDHVS GVQ  
TKASKILGINRNTLRKKVKDLGISCPTPRK

>gene\_1149|GeneMark.hmm|317\_aa|-|20407|21360 >NVVL01000052.1 Rickettsiales  
bacterium isolate NORP64 Contig\_source1382A\_23653, whole genome shotgun sequence  
LANPVILAPMSGVTDLPYRKL VKKFGAGLVVSEMVASRAMIARSDKSLKKCAIDNDDNDA  
TKACVQLAGCDPDIIAESAKMNEDMGAKIIDLNFGCPAKKIVGGFAGSALMRDEELATKI  
LYATVKAVNIPVTLKMRMGWDDNSKNAPVLAKIAEDAGVKMITIHGRTRCQFYKGSADWE  
FISKVKEAVKIPVIANGDIVCIDS AVEALKQSNADGIMIGRGCYGKPWLISQIAHFLATG  
EKLQDPSLEAQLGVVLDHYDAMVEHYGADTG VKMARKHLGWYSSGLKNSSEFRASINQLV  
KIADV KDRINEFYGSLI

>gene\_1150|GeneMark.hmm|57\_aa|-|21363|21536 >NVVL01000052.1 Rickettsiales  
bacterium isolate NORP64 Contig\_source1382A\_23653, whole genome shotgun sequence  
VQAAKVRKSPCAVKKSPGTGRAYLNLLNFDKISSKKYATMRVLKI QKHKKCKFESII

>gene\_1151|GeneMark.hmm|158\_aa|+|21740|22216 >NVVL01000052.1 Rickettsiales  
bacterium isolate NORP64 Contig\_source1382A\_23653, whole genome shotgun sequence  
MQKTD TQKANTQKVVLPEGYKPS ENEEYMNPMQIEYFKQKLLAWRDDLDD SRETLDHLK  
TENWNEPDLNDRASVETETTIELKTRSR YCKLISKIESTIERIEKGN YGYCEETGEEIGV  
KRLEARPVATLCIEAQM RHENYEKTHIDEDNVDVHTAI

>gene\_1152|GeneMark.hmm|1117\_aa|+|22624|25977 >NVVL01000052.1 Rickettsiales  
bacterium isolate NORP64 Contig\_source1382A\_23653, whole genome shotgun sequence  
MKLKNCISILGVSALSSSVALGGVSIVGGTAYVTGSYS GTIVDPTIYNSLNV DIDNTSSP  
ILNNDVTGGD VDV RGSSSPIFQETVNGDYVNIRDDSTPTFEKSVTTSSPYFVAVRDNSSP  
IFKGDVYSNHDL SINGTSTPNFMAKTESGRYVYVFGNATAAFTGDVTANYGLSLRENATG  
TFDGKVSSNYLFI FDN SKSTFN GEVTTGDYISISGAAEPEFKNTLTSTG SYIKIADSAK  
PIFHDDVSVKGDVTISGTSESEFKSITSTNGVILVQDDAKVIFYDVTSDGDITASGNSI  
TEFNKATTGANSSLIVKDAKATFHDDVSDSNITISGTSESEFEKLTSTSGTMDIQND  
TKVTFHGDV LASGNVTISGTSESEFKQNLSTAGSIFVQDDAKPIFN GSPSTTI AKGNSK  
PIFNAPASNVEIRENSEAIFNDPTGDIYISDPTPTVTFKGTSSSKITLLHASPNTPI LK  
EPGFTSSGDLIIDS IININLSEPTISGTVKLNKISMEADTKIKLDNDVTMDTPISTSVDK  
TGSLEFLGDAKILQDIGSKTNWLKNVTFDTNPADISLEGNIYANSVSFSGSNISFVNDRS

ITTGQSSSLTYHDSSLDLDTKKLTVSGKTLFTGKTTFKTTFNVDGGGKETGGHIVVDGANS  
SFNFSGATPVEIILTADSPLSPTDTSYKLLIEENGGTIIPANNITFTPENENSLITWTY  
DEATHLNAKNNPAQLPVIVAKTGGSEDDVKVAATLASANSSNICDATNVVMSNIGRLKE  
AQMLEAVQRVQTTPLGARATEISSAILNELEARITSLVTGNQFADAGVAAGDSNNKYGV  
WANGFYGRGYQGRPLHSPKYNSRLYGLTIGADAPINDDVIYGLSMTSVRSTTKFSDKKAN  
DVVKVKS LVFSFYAHRDLGRNWFSDVIFSSGVNRVKGMEKRVSFNNPNQLAVSKYKASTY  
SGQLMLGYNHHTKDNVIITPFGSLGYSWVDKIKYTETGAGAQNLSVQSGSSYVLEASFGG  
DVAFQTLIKGVPVTPEIHAYISYNFKVKRPTVIKLMGACTPIPARVAKGNKLFYNIGGE  
INAISESGSIEYGLNVEIKLSKKYINQVGGGLKLRVNF

>gene\_1153|GeneMark.hmm|665\_aa|-|25989|27986 >NVVL01000052.1 Rickettsiales  
bacterium isolate NORP64 Contig\_source1382A\_23653, whole genome shotgun sequence  
MTKPLFEKVLVAGRGEIALRIMKTLRKMGIKSVAVYSEADTNSMHVQYADEAYYIGNSPA  
TESYLSISNIIGAIRVSGAQAVHPGYGFLSEN PQFANILKRNGIILIGPSAQVIKKMGDK  
IEAKKVAIDSGVSTVPGYMGIIINSLDQAIEIATEIGFP IIIKAAAGGGGRGMRVVESTDG  
IQKAYESAKFEAENCFSDSRVFIEKLIKEPRHIEIQLLADQFGNAICLGEREC SIQRYHQ  
KVIEEAPSSFVDEETRQKMYNEVLALAKKVG YFSAGTVEFMMDKEKNFYFLEMNTRLQVE  
HPVTEITGIDIVEQMIRIAAGEK LAYSQEDIKLTGWAIESRICAEDPSRGFLPSSGRIL  
EYQEPAKTSHVRVDSGIGAGGEVSMFYDAMIACLTHADSRKQAIEVMKNLS SSSIIGI  
SHNISFLEAISHQRFDGNIHTGFISEEYPDGFSGANLTSEMSEVFLASTIFAYLTEQK  
RAATLSNQMTDQSNKLATRWIVNINDEQFSV IIKQVEDGYNIRHGSNRLTIRSNWNIGSP  
LITATINGRKANIKVERIITGYRLTHAGVTFD TYVRSPRMSELESLMPVRDSTDDQKELL  
APLSGQIIALSVAVGDEVVPGQEILT LTAMKMENIITAERAGKIAKISVSELEQVNSGQI  
LVEFE

>gene\_1154|GeneMark.hmm|514\_aa|-|28005|29549 >NVVL01000052.1 Rickettsiales  
bacterium isolate NORP64 Contig\_source1382A\_23653, whole genome shotgun sequence  
MGKQSFWREKELEKNQSAARLGGGAKRMLTQH SKGKLTARERLEILLDPDSFEETGMFVE  
HRCDFNGMKDKKSFSGDGVVTGHGTINGRLV FVYSQDFTVLGGSLGEHHAKKICSLNSAI  
EVGAPVIGINDSGGARIQEGVDSL AGYGELFHLNVKASGVIPQITLVMGPCAGGAVYSPA  
LTD FIFMVKGSSYMFVTGPDVVKTVTGEEVSKEELGGAKVHTSKSGVADLAFKNDIELL  
ETRRFFNFLPLSNRTEL PTRSTRDPADRVDMSLNTLVPSTPNKPYDMKELIERIVDEGEF  
FEIQPDYAKNIIIGFAYMEGSPVGFVANQPLN LAGCLDINASCKAARFIRFCDAFSIPIV  
TLVDVPGFLPGISQEYNGI IKHGAKLLYAYAEATVPKITVITRKAYGGAYIVMNSKHLRG  
DVNYAWVNSEIAVMGAEGAAE IIFREESKDPEKKQAKIDEYKEKITS PFVAASRGYLDDI  
IKPQNTRWRICKSLKYLRTKKT DTPWKKHDNLPL

>gene\_1155|GeneMark.hmm|342\_aa|-|29726|30754 >NVVL01000052.1 Rickettsiales  
bacterium isolate NORP64 Contig\_source1382A\_23653, whole genome shotgun sequence  
MIENDNQ NADLMVAEAEEDTAFVEILEPEPSEEEQYLSHDPLICGT LAIKSYAIEFLEDY  
LPAEIQKSVLDSTINVEPESYVEDTLRKKMSD LVYSVKTKEGD DAFIYLLLEHQSSVDYW  
ISFRLQKYM LLLCERHKKNKEPGKLP IYPLVLYNGKAKYTASLNFWGLFDDPKRAKEVM  
GGDYTLVDLHAMSDDDINERYSSLVLSAMKHIHDRDTL KMLDLLFGRCKIALSLDKKED  
YVLLRMIIIEYTNPKVPAEK RKELEQVIKGHLSKKEGENFMKTVKDSYKEEGREEGAEQKS  
LQIATNLLNQSLDQSFVASVTGLSISEVERLQSSAHNASSSL



>gene\_1156|GeneMark.hmm|224\_aa|+|31073|31747 >NVVL01000052.1 Rickettsiales bacterium isolate NORP64 Contig\_source1382A\_23653, whole genome shotgun sequence  
VRRVKSLLLIIFKSFAIFAHIDRELLESQKCSNIFGHFEKEYDLPKDTLYAISLQETQ  
KTHSKHNIWFAWPWTINVGKGYFFKNKEEAIKFARAKIKSGKKSIDVGCMQINLKYHAK  
AFDSLEEAFPAKNIAYAAKMLKDNHRRFGSWREAIGRYHSGIKKRAVRYHASVNRRISS  
IDVYKKHLRDYIISQKRNEEFEPFSIQISVASYLSGSWFRASA

>gene\_1157|GeneMark.hmm|294\_aa|+|31796|32680 >NVVL01000052.1 Rickettsiales bacterium isolate NORP64 Contig\_source1382A\_23653, whole genome shotgun sequence  
MFDLQKLERNRAKSYAFIKGSNFHQFVCDDILNRLEPVDRDFKDILVIGSALGEMVCADV  
KKHYPNSNISLTSEVDNLEQQSKDHQSKDHQSKDHQSKDHQSKFDLIIFPGLHWNVDVQ  
IFLAKIKRMLTDDGVFICSFPAAGTLPKLRHLVQLEEKHSTSHVPHISPFIQFEQVTQL  
LQQAGFVENIIDTENLELEYDSPLALMRALKNHGESNALTCAVYSITKAMHKELGKKKE  
SDSEGISSGTGEEKDSAEEDMKEDSFIDFVNLTSSISSATKKTIKLKPYPYFQG

>gene\_1158|GeneMark.hmm|465\_aa|+|32790|34187 >NVVL01000052.1 Rickettsiales bacterium isolate NORP64 Contig\_source1382A\_23653, whole genome shotgun sequence  
MQEFDLVVIGGGPGGYTGAIASQLGMRVACVELRKNLGGTCLNVGCIPSKALLNFSEKY  
EEAREHFADIGIITNAKLDLAKMLAKKDGVVSDLCKGIGSLFAKNKITRFSGVGKILDDK  
TVEISSGSKKEKIKAKNILIATGSEVIDIPGVEVDEESIVSSTGALTLSKVPKELVVIGG  
GYIGLELGSVWRRLGSKVTIVEFADRIVPALDKEIGKSFTKILEKQGFNFMMSTKLVKAT  
KKSQKVELVSVGVGDSKESKLSKCDVVLVSVGRKPNTGLGLVELGVILDDRGRISVNENF  
QTNMNPNIYAIGDVIKGAHLAKAEAAVEIMNGQAGHVNYNLIPGVVYTWPEVASVG  
ATEEELKQTSVNYKVGKFPFMANSRARSVGATDGMVKILACAETDRVLGAHIIGADAGTL  
IGEIVAYMEFGGASEDIARTCHAHPTLNEAIKEAALAIEKRTINM

>gene\_1159|GeneMark.hmm|296\_aa|+|34312|35202 >NVVL01000052.1 Rickettsiales bacterium isolate NORP64 Contig\_source1382A\_23653, whole genome shotgun sequence  
MSRVSVGGENYGSADNPIEASVSAREVMEVVDAAWASHKRSNSLYGLMADLASSFGKDQSK  
LTNIMNLRGGEVVHILGNEGILFKCSCLNSIEKRESLERSEGMDGIKKGDPINSSKSIE  
EFKSFLEPGARHSFEDIDAIRSVFADYFDEEGVERLIPIIEQGNKYAYIRGTSARVLLK  
VSKDGNDSPIYLETIKKSQSNAISVGKTWQDFSDKISEFCRLKESARSFADFKNLLD  
SFLTGLTLENIVSILATGGPVYLKGYDEVNILLKTSHDNDVEITGSIMPWCQNDA

>gene\_1160|GeneMark.hmm|144\_aa|+|35273|35707 >NVVL01000052.1 Rickettsiales bacterium isolate NORP64 Contig\_source1382A\_23653, whole genome shotgun sequence  
MSRDNIPYIGLVGAGQVFSFSVERGGAKFLGLEFSGEHMNWFALFDRIFQVLRISWWVE  
ALLDEWRGDIAEEPVDVRPEARSIFRFSIDVYHIKYLHIDFSGECADWLCDVQDELA  
FVQDAQEMLGVLGGDAVAEAYQFG

>gene\_1161|GeneMark.hmm|69\_aa|-|35838|36047 >NVVL01000052.1 Rickettsiales bacterium isolate NORP64 Contig\_source1382A\_23653, whole genome shotgun sequence  
KDEGKIPKTEIYDIFTPFKMGSNTESKAEGRGVGLALCKSVIEAHDGEIEAESHAVGAL  
FRVCLPYGK

>gene\_1162|GeneMark.hmm|104\_aa|-|90|404 >NVVL01000053.1 Rickettsiales  
bacterium isolate NORP64 Contig\_source1382A\_23664, whole genome shotgun sequence  
MNNIENYYHLRKEGLIHHVSGLVTESAEDLGTNIAETLLYNELEAVKTQTPEEIEEMRAI  
HDQISNNIDTAICKYRDSLIEEIKNEAMKIKVSNASITKEQKEC

>gene\_1163|GeneMark.hmm|84\_aa|+|856|1110>NVVL01000053.1 Rickettsiales  
bacterium isolate NORP64 Contig\_source1382A\_23664, whole genome shotgun sequence  
MVASKISRHSDKLESYDGGDIFSDIRYICSSLSLIVGSLQKGFDAQLPSGDVIVTEVKT  
INTQYSWDKKRKKMIKVGIVKLVE

>gene\_1164|GeneMark.hmm|180\_aa|-|1150|1692 >NVVL01000053.1 Rickettsiales  
bacterium isolate NORP64 Contig\_source1382A\_23664, whole genome shotgun sequence  
MARERRSSAEIVETWNGQEEGVAYYDLVQEMSELLKEALGEEDFERAKTIIVNAKKNPA  
EVAWEGLGSLMLNMFDSISSQLPICEALQFTPTGIHTMTDIDFKAHPATPEQVRNFAALL  
PNEEKLKLIVVHSVPLGMQNAQAQIWDVAVPQTTTVQVDYIGGYSERGLPGAMETQEPTEG

>gene\_1165|GeneMark.hmm|165\_aa|-|1787|2284 >NVVL01000053.1 Rickettsiales  
bacterium isolate NORP64 Contig\_source1382A\_23664, whole genome shotgun sequence  
LNHMLDSQLIAIVEKIKTAAQKGVITISAAESCTGGMLAAYLTAISGSSKYFHGGIVSYSN  
SAKINLLSVNVTLEKFGAVSEETAREMATGARKVLASDLAISITGIAGDTGGTRDKPIG  
MVCFAIANNEGVQSYTHHFTGDRTEVRQQACKIALELLAKMTRI

>gene\_1166|GeneMark.hmm|201\_aa|-|2281|2886 >NVVL01000053.1 Rickettsiales  
bacterium isolate NORP64 Contig\_source1382A\_23664, whole genome shotgun sequence  
MDIRKKIAELFATIFYIGKIKYAPGTLGSLVAFPLCYMIVYLTNSQFVQISSLNFEES  
QIFTLFTVAISTLLIFIAGTYATKIYIEGAEQDPSEVVIDELAGQMLTIILSSFSVFL  
LHGTQIASMYDAQTIDFLLFLLPFILFRFFDIKKPWPINWMDKNIKGALGVMLDDIAAA  
LFATITHYAIIFIILDFYKMOV

>gene\_1167|GeneMark.hmm|108\_aa|+|3006|3332 >NVVL01000053.1 Rickettsiales  
bacterium isolate NORP64 Contig\_source1382A\_23664, whole genome shotgun sequence  
MKELIAKFDDFEERFAKDTSDPELIKFFDEFVGYVEKIDLDSEKHLQIKQRMHKLQQLFA  
SRKEELTEESNNLMVKQKQFNRYITNFGYKNFSYKDGLTNKKSGAKWN

>gene\_1168|GeneMark.hmm|92\_aa|+|3340|3618 >NVVL01000053.1 Rickettsiales  
bacterium isolate NORP64 Contig\_source1382A\_23664, whole genome shotgun sequence  
MELEIILKALLSLGFVFAVMYVLLKIMQKYSNVGSGSKLGGAESGLKIENILYIDGGTKI  
INIANKSGSNYVIAVAKNNSFLIDKYKTKKEE

>gene\_1169|GeneMark.hmm|249\_aa|+|3615|4364 >NVVL01000053.1 Rickettsiales  
bacterium isolate NORP64 Contig\_source1382A\_23664, whole genome shotgun sequence  
MNRKFALLNIYILLGTLIPELALASDSFATELEHLLSSSSMTSRLMQIFILLTVLGLAPS  
ILIMVTSFVRIAIVLSIVRTALGLQQSPPNQVLVSLALFLTFIMSPTEESYEAGLKPM  
LEESMTEEEAFPLIVQPFKNFMTANTRPKDLDFCSIAKIEIPKEAASLPLRVIIPSFMI  
SELKRGFEIGFLIFLPLIIDIVVASILMAMGMMMMPPVMVALPFKIIFVLDGWYLLA  
GSLVQSFAT

>gene\_1170|GeneMark.hmm|105\_aa|+|4385|4702 >NVVL01000053.1 Rickettsiales bacterium isolate NORP64 Contig\_source1382A\_23664, whole genome shotgun sequence  
MTKEITDSEFEAEVVNSKEPVLVDFWAPWCGPCKMLTPILDQLSEEMAGSVKVVKMNIIDD  
NPEIPSKFNIRSIPTLMIFKDGKSVASKL GALPKNSIKAWIDSSI

>gene\_1171|GeneMark.hmm|1046\_aa|+|4706|7846 >NVVL01000053.1 Rickettsiales bacterium isolate NORP64 Contig\_source1382A\_23664, whole genome shotgun sequence  
MTSLNWGIVFEDLSSLSGLKKLDERFLQYVQSHDSGLRLELLSNRTKALAGYWDKCTYQE  
KSVRELEYSEFLNLAPLLDDFIADLFNITEENLALKHQSSSEFDIVYECRRKFIQRHALK  
KYPKEKLDDSDFAVISLKMKELLGQISEQSIKSVMKWQAEPEKFAPNLDIAAKYCAFV  
HKNSSLVLFDPVRRIDDNNHIRSHKIDQLSKDVCLGFDYRDKEQSMPRAMAHAKYCIYCH  
KQNKDSCSKGIDSSINGCPLGQKISEMNQLKSRGFNIAALSVIVIDNPMIAATGHRICND  
CMKACIQKQDPVNIPLVESNILDQVLCPLWGAEIYALLTQWNPLNLAAPLPKPD SGHNV  
LVTGLGPAGFALAHYLLKEGHSVAAIDGLKISPLHFDALRPIKYWSDVKLPLSQKSPTGF  
GGVMEYGITNRWDKNNLSLVRLLARRKAFRMYGGARLGSNITTKQAFDMGFDHIALCLG  
AGKPRFMKSADYFAKGVRTASDFLMNLQGGAYIHGSTSNLLVRMPGVVIGLGLTAIDAA  
TEMLHYYPVQVENFLQKWESKENPEDGLGPEDKAI AHELVT HAKLLRAAKNDAERLKILA  
GFGGVTICYRKTIKESPAYLLNHEEIEHAKAIGVKFEELMVPGEVKADEYGSASSLSFAN  
GREIKAKSILIAIGTGSSEFQDIDGLDLEGAEIFRRKDNKISYFGDCNQKYAGSVV RALA  
SAKNGYKSISETLNLETKQSLGSRRELCVDALGTQLKSYVKKVNILSDNIVELVVHAPLA  
AENFKPGQFFKLQNHKPNHLKNQQGNPASEMEPLAITGAHV D KDKGLIWLIILEMGESSR  
LCRTLQEGEEIVLMASGTATSIAQNKRVLLIGGGLGNAVLAPIAQALLANSCHVTYIAGY  
KKLKDRFYPERIEQNASKVIWACEEGEASARADDLSIKGNIIAGIEYARKKNLLGGIDQV  
ICIGSDRMMRAVSSQRKRLFSAEMICSINSPMQCMMKGICGKCIQKTS DARGYIFTCEC  
QDQNSDIIDF DALEKRLA QNSLLEKI

>gene\_1172|GeneMark.hmm|253\_aa|+|7980|8741 >NVVL01000053.1 Rickettsiales bacterium isolate NORP64 Contig\_source1382A\_23664, whole genome shotgun sequence  
MTKSSEWQMILGSSSEDWRLNFVSVMNLSLLVMCEEFGSNAEKGVASSGLNARSNEILAK  
SLDALPADMKPYCEQGFSSNILGFLAFNEKVKGFLLSQVFLLSSPEAQQVDQFYDLRGQ  
AIKLLKSLSLKQVQYLVEKPVMMVVLGDDDYAEAVDALGEEYLLTILKAPGAIEQLGDLG  
AVIQDVQDITTLNKILWANLAVDLGIVQARKDELAREAAEELAAAEFVSDQELTELPLG  
EDYGYVAGTYNTD

>gene\_1173|GeneMark.hmm|463\_aa|-|8932|10323 >NVVL01000053.1 Rickettsiales bacterium isolate NORP64 Contig\_source1382A\_23664, whole genome shotgun sequence  
MSKKPDGMDVSNNGSTTKRTAEALGGGTESAKRVKLT TTDVAVDPADKHGHTALMRAVM  
EGHVGVAMELIENGATVNLTDEQKT NIFMRATHNGHANVVAVLIENGTNVNLT DNDGRTA  
LMFAIHNGQADVAVLIEKGATVNLPDKQTTNIFMWAIHNGHANVVEVLIEKGATVNLT D  
EQTTNIFMRAIHNGHANVVEVLIEENGATVNLTDEQTTNIFMWAAQKGHADVVALLIKQGA  
NIDQLDPNQDTALMFASQYGHANVVAVLLQRSANIHLVNDRDDTALGYAYRYGHDNIVKL  
LREGANIDLTTSAHDLEWVFND FQMPVFILA AKYGKLEIARTLLQQGTNVDLADEGGT  
ALTWAAVNNHADVVAMLISGGSNIWVLSVEEFVNNPTSALLLRHIGSSMLKITAELYNET  
LVDLLKLVVSTIMPQDYGVSNLDSSFTFDAHMIGNGAIDDDML

>gene\_1174|GeneMark.hmm|1065\_aa|-|10758|13955 >NVVL01000053.1 Rickettsiales bacterium isolate NORP64 Contig\_source1382A\_23664, whole genome shotgun sequence

MNILQIEASNPEISTWVSASAGTGKTKILTDRVLRFLQGCPPNKILCLTFTNAAASEMR  
ERVTSLSLAKWSGLSEAGLKEELSKTLGRPPARGELTRARNLYSAYLSLEEKINIQTIHFS  
CQKLLKKFPLEAGISPSFRIIDETKSYFILQQIKKTLLYKEDLAPIHEYLTFANFHEMIID  
EILSEIVGQRDKFLNLDIDNIHEKSLQIISELQKDFDQHYSAILRHQIVQDIVGFDVSV  
ELKSFFLTASGQKKKRIVPQKIAKPGSNLYSDLEHIQHETHQIDQANRSHQLEHHSKLLS  
LLGASILRTYAEFKSNKGLLDYDDLIIYASKLLKSSDAKEWVLYKLDGGINHLLVDEAQD  
TSSTQWQIIDAMIGEFYAGESGREENRTVFVVGDEKQSIFSFQGADVASFAHMNKLLKHK  
MTSGGKEFKDINLSISYRSAAEIIESVHHVFSYIKNHMPDNFHPHLPKIEAFRTKHSGSV  
ELWPICKTNEVPESFWPIELSEESKATSSHALAGKIADYIEKQIQSGRILPSTGAPVAYG  
DFMILFRKRDEFTQEVIRALKNKKLEVSGLDRISLRENLAVRDLLAVAKFVINTHDDLNL  
ASLLKSPLIGISEELYDIATKRGENSIWEYIQNKLADNNSSSDNSSNIFTKLSVFIDLF  
DQSNLNNFFQHIVDILDYRETLNAHCGADSNDAIDELLYASRNFAREHGTSLQSFIFWLE  
NIDTSIKRDSASLNKIRIMTLHASKGLQAPFVILCDTTGTPVNSDRFLLGVDGKTLSSAK  
SSSEPDYYKELKALKQSKAYGEYLRLLYVGMTRAEDHLVICGYQGSKKLPENCWYELARQ  
AMQDFAQLSEGDRLIYGTEEAARLDDSAKQASGVEFFYNRKQVLAQKENVIPKESDYH  
KPDYSPLSKKDPMGYGLAFHKILEDSIKIADPGSMRSHPLIKTLDAKPQKRIKSSIEKIL  
ANQEFMQLIQQDAKTEIGIGTRADGALKIGRIDLIVTRAQEVIIVDYKSDLLPPAADKPV  
PENYYNQLLFYRETMQKIYPNKQIRTMILWLENGKLELEDAQAT

>gene\_1175|GeneMark.hmm|254\_aa|-|14113|14877 >NVVL01000053.1 Rickettsiales  
bacterium isolate NORP64 Contig\_source1382A\_23664, whole genome shotgun sequence  
MNIIHAQNKENFISYNRLVAAKKKAPFVIFHHGFMSDMQSKKQQLVESFCKKQGYNFIK  
DNYGHGESSGEFLNHTISSWTGGLELIVDNLAGDRPALLVGSSLGAWITALFAIKYPPKKV  
MGMVLVSSAFDFTEELIWNLPQEQRDILERDGFYEVIGTDPSCDHTYPVSLDLILDGRK  
NLLLTRDKINITCPHLIHSMRDIDVPCSISKRAAEKIVSDDVVLKLIKADHNMSGEKE  
MHIVCNSIEELMEG

>gene\_1176|GeneMark.hmm|386\_aa|+|14906|16066 >NVVL01000053.1 Rickettsiales  
bacterium isolate NORP64 Contig\_source1382A\_23664, whole genome shotgun sequence  
VTTTRKYHHRHYKKTILQVVPALISGGVERGTLEIAKKIVDSKNISFVISSGGPLVDALK  
KAGSEHITMNVASKNPLTILRNVSIIKIVIRDNDVDIIHVRSRAPAWSCCMAAKATGATL  
ITTFHGIYNFKSWIKKYNSVMTEGKRIVAVSNFVKKHIMDNRYRVDESKITVIHRGVNHK  
AFEQKLSAEKLSRFREKYNVPAGSKVILLPSRVTAWKGHMVLIDAINKIKDLDFYCIIA  
GDLAKHPGYVARIKDKIKKYKVQHRVQLFGNEPDIMALYGISDIVLSTSVPEAFGRITII  
EAQSMKEMVIATNIGGACETIINDKTGFHVAVGDCEDLANKIRHCLSIIIGTDEAKTITTN  
ARKIAQEKFSLDCMLNSTLAVYDEMS

>gene\_1177|GeneMark.hmm|280\_aa|-|16199|17041 >NVVL01000053.1 Rickettsiales  
bacterium isolate NORP64 Contig\_source1382A\_23664, whole genome shotgun sequence  
MRINNNFPAPSYSSRVNTIKYVIIHFTEMEFDGALSRLTDPAAEVSAHYLIKEGGEVFL  
VADENIAWHAGKSFWNGEESLNKTSIGIELDNLGNRAFDAAEQIKACLELGGILQKKYDIP  
SFNFLGHSDIAPDRKIDPGIFFDWELFYKNGFGMGARSRRNLAEREQDLGTRRQDIKSR  
QNLAKDEQGLEMGVFLSFGDVSEDVRSMQRLQILGYKIDVTGIFDEQTNFVVRAFGAHY  
FPEILQEKGAAAYQKLDISKYDWHYGADAFLNELIRIYKTA

>gene\_1178|GeneMark.hmm|272\_aa|+|17120|17938 >NVVL01000053.1 Rickettsiales  
bacterium isolate NORP64 Contig\_source1382A\_23664, whole genome shotgun sequence

LDNILTIEKTDKPHGAVKSEVLSLVLVILALAVRTFIFELFYVPTGSMRATILEGDYIF  
STKYNYGYSIYSIPFNPDLFEGRAMASQPEYGDIVIMRPPHNMEERYIKRLIGLPGDKIE  
IVNDLTYINDKPVTRLEVGGQFVSEDEIKYIKFRETLPNGLSFFSYKLYSTKELGADQRN  
YGPHIVEAGHYFFMGDNRDMSGDSRYQLGMVFPFRNLIAGRFFSTKESLWDSKAGFVE  
QITRVWWTWLSIRFNRIFYKLYEPKSDSGNGK

>gene\_1179|GeneMark.hmm|229\_aa|+|17928|18617 >NVVL01000053.1 Rickettsiales  
bacterium isolate NORP64 Contig\_source1382A\_23664, whole genome shotgun sequence  
MESNFSKESISPLEEAIGYQFKDIILAEAFSHPSLKQVKESTLNYERLELLGDSILGLF  
VTELIKFRFTSEEGILAKIKAHVVGAEILVKISESLGLADYIIMTNGEEKSGGRLNPNNL  
ENTLEALIGAIYLDNIDSVRAIVANLWAPYIENVDFSASDPKTFQLQELVQRNGEDLPKY  
TVIGREGSDHSPFLTVEVKTEEHTETGDGKSIKEAQKNAARMLLGKINN

>gene\_1180|GeneMark.hmm|299\_aa|+|18647|19546 >NVVL01000053.1 Rickettsiales  
bacterium isolate NORP64 Contig\_source1382A\_23664, whole genome shotgun sequence  
MQKQKALSICIVGKPNAGKSTLLNRIIGTKLSIVTPKVQTTRSITGVVTLGDTQLVLF  
TPGIFEPKKKLEKAMVRCAWSSFSADIVVLIIDSSSKLDEMSETIVKRISLNQKIVFL  
MKNIDLRSKYFLDNIFLEESVPKARIFNISATKNGVDGFLNYLKEQATESGWSYKDD  
ITNLPFRFLGCEITREQLFLQLQELPYNLTVECESWTEQKDGSVKVRQVIIVARDSHKN  
MVIGKHGSRIKEVGSARVNIEKLLGQKIHFLFVKVRKDWENNPEFYQAMGLKYLKDE

>gene\_1181|GeneMark.hmm|259\_aa|-|19602|20381 >NVVL01000053.1 Rickettsiales  
bacterium isolate NORP64 Contig\_source1382A\_23664, whole genome shotgun sequence  
MKESKLVENIAILHNSDQLVKIARSLEKMFNRTSPQEADLIIVIGDGSMLHALHKYM  
HLDIPFYGVNAGSIGFLMNDLHTENFLGNIHNSKITKLYPLEMHTIGEDGSESALAIN  
VSIFRKSQVAKFKIEVDGVRMELSADGALVSTPAGSSAYNLSAGGRIVPLAAKILCLT  
PICPFRPRRWSGALLPIDSVVRFEILEPKKRPVNAVADFHEFQNIQSVTIKSTEEKAIRI  
LCDGHHTFEDRVIKEQFTY

>gene\_1182|GeneMark.hmm|558\_aa|+|20496|22172 >NVVL01000053.1 Rickettsiales  
bacterium isolate NORP64 Contig\_source1382A\_23664, whole genome shotgun sequence  
MSFNLKTNKDKLLFVPLGGSNEIGINVNLHYHKGKWMVDCGSGFADEHLPGVDMVVADL  
SFIEAHKKDLLGLIVTHAHEDHLGAIQYLWNELECPYTTKFTKTKLAKLSEYSFPDSM  
KIHEVDPKKKFNLGDFSIEMIGLTHSAPEMQALMIRTDAGNILHTGDWKFDPKPIIGEPS  
DEKALKACGDEGLVALVCDSTNVFNKGTSGSEGDVRESLVKIISECPKMVVVTTFASNLA  
RLDTIIHAGQKAGRKVLTGRSLHRMLTAAQESGYLNNIAPLVDERSIGSHKREELLIVA  
TGCQGEEMAATSKIATGIHNSITLAPKDTVIFSSKIIPGNEKKIFKLFNIFVKKGIEVIT  
EKDHFVHVSHPAIDELKKMYKLVRPEICIPVHGEPVHIHEHARLARSEGIKHAIEVENG  
SVVLLDKKSPKIVDKVENGYLAVDGNYPDNLHIFKMRMRMRDSGIVVSVVLDENQRV  
ALPPMLSLPGLLDHIEDAELISILKDEIHKGLKQKKNRQVLLVDQIESCIKTSRRAI  
KHEVKKSPIIIVNLEEID

>gene\_1183|GeneMark.hmm|55\_aa|+|22391|22558 >NVVL01000053.1 Rickettsiales  
bacterium isolate NORP64 Contig\_source1382A\_23664, whole genome shotgun sequence  
MTCQDVYKEEGKEEGRVEGRVEGAEHKSLQIVTNILQQQFDLQKQIVSITGFLAR

>gene\_1184|GeneMark.hmm|1360\_aa|-|22861|26943 >NVVL01000053.1 Rickettsiales bacterium isolate NORP64 Contig\_source1382A\_23664, whole genome shotgun sequence  
MSKIYPANKKRIAKKKATGKKLLSSSVLAGLFISSACYTPLANSQDYAFYNQTRTFSGNI  
VASNNNPPAIELYNSTVIFKGTVEANSNRSFALYLRNNSTANFKKTMTANENSIGIFIND  
NSTVKFKKAAEFNKNSTGVFLNDSTGNFNHTLTANENSLGMILNNSTGKFKKAVEFNKNS  
TGMVLDNSTGKFKHTVTANENSLGMRLKNSTGNFDKNVTLTNNETGITTNTSTIIFKNKL  
IVSESTITGISILNSDVTFTVELNNNKLGLSVTDSTVIFNGPLTVTNDSPVSSTGITAS  
NGELVFNDITSHDLILSDNSKIILSDGITASVPITTNSNNKNSVICKGSVTINHNIGEY  
GKLEEVSFNSAGSRNSITLNAPIFASNALLDGTGLGNFTNGIIISNNLKIKGASAANFIK  
GVSTGKDLSDNATPDFQDDVTVSETLNITADAKPVFHKAVSSKDLSIADNAVPDFQDS  
VTTTGILNITVDAKPVFHKAVSSKDLSIADNAVPDFQDSVTATGILNITADAQPVFHKAV  
SSKDLSIADNAVPDFQDSVTATRILNITADAKPVFHKAVSSKDLSIADNAVPDFQDSVTA  
TGILNITADAKPVFHKASADADITITDENSEPEFKETVSSGGNITVDLSSKPVFNLLAS  
SVIVQGNSEPIFNNTNGDVTILGTPTVAFNGASGGGVILPSSASATAPTLNFAADFSSN  
KELVIGSGAEVNLPEPTLNGTVRFAGLIEADAKIKLGDNVILDTKISPLVDKEGRLEFL  
GNATISQDIGSGGKWLKEINFNSADSNIELMGNIFSETMSFNASNIKLLNDTKITGQNS  
LNMHNNSLDLGSKSLVSGKSVLTGKTTISTTFIADPPGGNQGGHIIVDGAGSSFDGSGAN  
PVEIILNADSPPLSASEYEYKLFITTQNGGTVIPANNITFTSAENNSLITWRYEPSTYILT  
SANEPEQLPVIVAKAGGDIEDVKVATFISNADLSDSEDATASILSNIGRLSEAEILEAVK  
RIQATANFGELADNIATQISNKLGERLTALTMENKFARAGVSSGDSGDDSGISMVNSADK  
YGVWMNGFYGKGRQGREHSPKYHSRMHGITLGADTALRQDIIIGLAVSGVQTNKFSNN  
KIDDKIKVNSLIFSLYAHKDLSEWFIDGMISGGTNNITGKEQRILLGGKKAIAATSKYKV  
RTHNGQFTVGYNKNISKNIILTPLAGLGYSWAGATKYTETGAGKQNSVTTDSTYVLEAI  
FGGQIAFQKRIKNIAVTPELHAHVSYNFKTKRSLINAKLAGAKAPIACLPRTNKLFYHI  
GGEINAQSESGKFEYGINYEAKLSKKYINHVGGGLKLRVNF

>gene\_1185|GeneMark.hmm|179\_aa|-|27137|27676 >NVVL01000053.1 Rickettsiales bacterium isolate NORP64 Contig\_source1382A\_23664, whole genome shotgun sequence  
MVKFLSEFAPLIAFFYGYKTGGILEATLYMVVVSVIGIVVTYIVERRINKVNLVTTALL  
VSASLTLFSGNSIFIKMKPTVLYCLFALALFVTHFKWRPAIQYALGAAIKFKDQRAWYHL  
NKRFFMFFLLMAAANETIWRNFSEDIWVNFVKVFGALPITIIIFIMMQVPFIMKHKIDEEH

>gene\_1186|GeneMark.hmm|273\_aa|-|27669|28490 >NVVL01000053.1 Rickettsiales bacterium isolate NORP64 Contig\_source1382A\_23664, whole genome shotgun sequence  
MFKIAVIFRECLEMAVLLGIIMAITKPIKNSKAYIALGSGVGVVFAAIFAMLASLIADS  
FGGLGDEIFDAFVLLITTAICWTVVWMQGYTTKLRDLGDLQINAGTTSKIMLVMMV  
AMAVLREGAEIILFVYSSSENIAVSEYVIAILLGGFVGFSLGAMIYLGLIKCTGKYIF  
SISTLLILIAAGLSAQAAGMLTSSGIIIEIYSDQVWDTSWFVENASVTGKVLNITVGYDS  
KPNLSLQIIFLTTIIITLAMMKLRSILSNKNSG

>gene\_1187|GeneMark.hmm|118\_aa|-|28483|28839 >NVVL01000053.1 Rickettsiales bacterium isolate NORP64 Contig\_source1382A\_23664, whole genome shotgun sequence  
MKKTAILYFMICALAAALPAYAGGFVEVDLIIDKHKHPETLKLPAKPKIRITVHNQDST  
IEEFESIDLKREKIVLGNASKARVILAPLPGTYKFFGFEHEETAQGKIVVEQETGKDV

>gene\_1188|GeneMark.hmm|522\_aa|+|29319|30887 >NVVL01000053.1 Rickettsiales bacterium isolate NORP64 Contig\_source1382A\_23664, whole genome shotgun sequence

MLINIPLVLAIIVLLSLVGNLYVYRKLKFAANKTTKGILSGAEDLTYRIDALTRQNQALF  
TMITEDLSSDPSKSDKLRKLCNMIDDSHNPLEEAKGYQCLAKLHLADKNKGQLDRLKAI  
KNTSYALNLSHDPEYVRLSYVAILGESVDELISLFVAQSDDALQKLLSSLNVADSTEEIK  
LLEKIIQLADKDVKIRAKYRLSHIYQNGHSAAESTEIPIDYIKLENRKYVFENVKTTSK  
NIVNIALTFDDGYAAHASTNIASLLVNADPETHYKFYIVDGVVDVQISQENREKLSSLYI  
KEYDINFITFPDEILGKIDEKYPKIVLYRIFLSKILDISKIYLDSDLVVLRDLW  
DVFNTETSFISATLDPLSFRHAKLPRNNKAMCKSSVFYINSGMMLLNLDAMRGRDLAAEI  
QDVIKNAKYPFNLDPQDMINFTYKDKINFISPKWNLNLLKDTGFAKHVFGTKPWVWPTSQ  
DATETWKNAPQTVPEGHRRYWHYLDITPWTTKKDKLQAVISD

>gene\_1189|GeneMark.hmm|72\_aa|-|30923|31141 >NVVL01000053.1 Rickettsiales  
bacterium isolate NORP64 Contig\_source1382A\_23664, whole genome shotgun sequence  
MAISKFKSHCLEILDKLEKSSIIITKRNKPIATISPFVRKKESLFGLLANKAEIKGDI  
IAPIDDSWEANK

>gene\_1190|GeneMark.hmm|363\_aa|+|31364|32455 >NVVL01000053.1 Rickettsiales  
bacterium isolate NORP64 Contig\_source1382A\_23664, whole genome shotgun sequence  
MWNWQRNDWPNFSYDSAVLEEFKAEKAGENLGAFKHVSEEEKTQLRIDWISEEALKT  
SEIEGEFLNRQSIQSSICNQFGLKTDNHRIPPAEQGIAEMMVDLYENFNEALDHDTLWSW  
HKMLINTRRDIQAIGSYRTHKEPMQVVS GALHAPKVHFEAPPSKIVGRQMDAFIEWFTTS  
SLPALTRAGIAHLYFVCIHPFEDGNGRIGRAISEKSLAQLGRPTLIMLSYTIQQGRKNY  
YQNLQSNKHNEITQWL VYFAEMVLEAQDNTRKRIEFVIGKKKLYDRLQTLNPRQEKLL  
ARMFRENIEGFKGGLSVKNYINITKAPRTTATRDLDLVEKGALVKTGQLRYTRYLNP  
SFD

>gene\_1191|GeneMark.hmm|643\_aa|-|32571|34502 >NVVL01000053.1 Rickettsiales  
bacterium isolate NORP64 Contig\_source1382A\_23664, whole genome shotgun sequence  
MSRTSLQSTQITPFFENELIQDQFHQYLLIMMGNDNTVAASALAEKSSLG YEFQAKLRF  
FKREIQLMLQQAITMDNEVVVNMDRITDLDERFKGLMDEGFLSCIKKANDQHSAFKGVID  
GAENSLEIRIILVDKIYQLISQMQUIPDLYAASYIVQQGLTTYQGDCFNFMHFIATNE  
TDPRVLELLTNSWLAAGRSLSENNGTLSTTTPLNIALLDNVPFITALVERGVDITAPNE  
DGTTALHLLIYQIHLGISDISFLQKWL DAGLEVDLRAKLLAQKLELTVTNLIGEGSEIV  
QQTLDELVASITQNYLDKMILNGVSDIILTNFGDPNAMLLHYLIENHNTVPLSVFKHFLD  
SELLVRGIIDSRKTALQHAVEMGAVNFSVAMA EHGIGTTELDNGRHII EYVHYIGGEHKA  
AFVEAIKASQAIDMSGEQAAQLIADALIAKNGEFVATLVKAGADINHNDHELLKMFIKAG  
ADYSDQIELAVLHGAEITGDMLELAAAHGLGELLTGLKQVQDQEAPVEMLQDGAITTIKA  
LLVVMSEGPSDEIMPLLVTLRMQGLYNVLQKQPALFEQFCKQEGIWQEMVSRADARNPR  
EEKSKDKENVILPSHRAEDDDGNDEALLAGVSATAETSDYPLD

>gene\_1192|GeneMark.hmm|253\_aa|-|34752|35513 >NVVL01000053.1 Rickettsiales  
bacterium isolate NORP64 Contig\_source1382A\_23664, whole genome shotgun sequence  
MADNLKFKVRSYKSFGAHDV LKGVNLDVKKDSSLVILGGSGTGKSVLIKTMIGLLSPDS  
GSILYEGTESVNMPQKERLQALQNFYLFQAGALFDSLTVQENIVFFAEKLYSLNKNDKR  
DLASKKLRVGLSEKILDFYPSELGGMQKRVSLARAICTDPKVIFFDEPTTGLDPIMSN  
VINDLIKVRDELGATTITITHDMQSARAIGKEAFLYEGSIIWSGSIDEIDDSGNPHFH  
QFINGNIEGPVIV

>gene\_1193|GeneMark.hmm|64\_aa|+|2|196 >NVVL01000054.1 Rickettsiales  
bacterium isolate NORP64 Contig\_source1382A\_23672, whole genome shotgun sequence  
LFLIENMMPKAILMALIDLKEIELRLYNHGFNIKNGKSELTLKPCTAKGILRIKQSASNL  
GLSI

>gene\_1194|GeneMark.hmm|51\_aa|+|307|462 >NVVL01000054.1 Rickettsiales  
bacterium isolate NORP64 Contig\_source1382A\_23672, whole genome shotgun sequence  
MSADIIIFIGFIIFNLIFGLSSKNVTTIKGYAVGDQNFSTATLVATIVAT

>gene\_1195|GeneMark.hmm|81\_aa|-|660|905 >NVVL01000054.1 Rickettsiales  
bacterium isolate NORP64 Contig\_source1382A\_23672, whole genome shotgun sequence  
MATKKAGGSSKNGRDSAGRRLGAKKSDGQGVIPGNIIRQRGTKIRPGRNVGMGKDHTLF  
AMTAGKVEFVSKRTHKLVNVV

>gene\_1196|GeneMark.hmm|105\_aa|-|916|1233 >NVVL01000054.1 Rickettsiales  
bacterium isolate NORP64 Contig\_source1382A\_23672, whole genome shotgun sequence  
MFAVVKTGGKQYKVAKDSVIKVEKIEGPLGGKVELDQVLMMSDSLKASFIGTPMVKGASV  
TAEITSQFRDDKIIIFKKRRQNYRRKNGHRQDLTELKILNIVKN

>gene\_1197|GeneMark.hmm|405\_aa|-|1451|2668 >NVVL01000054.1 Rickettsiales  
bacterium isolate NORP64 Contig\_source1382A\_23672, whole genome shotgun sequence  
MYKRTSTKLINDISQTFPVLLITGPRQVGKTTLLKMCADETRNYVTLDNMEARQLAQTDP  
ALFLQTYKAPLIIDEVQYAPQLFSYIKILVDREEKNGMFWLTGSQKFHLMKNVSETLAGR  
IAILDLLGLSQSELNGYGDDAKPFMPTSEWLEQAKKVDTSNQLSDIYKNIWIGSFPRVVQ  
NNDIRDVFYSSYVQTYIQRDIKNILNVTDETTFYRFLCSVAARTGQSVNYANLAKDVAID  
VKTAKSWLSLLETSGLVYLLQPYHNNLTKRLVKAPKLYFLDTGLCCYLTKWPAKLSLEVG  
AMSGAILETYIIAELLKSYWHNGKTPHFYRRDLQKEIDLIIETGDSLHPVEFKKTATP  
SQTASKHFHVMVGKFGKKIGHGGVVCVEKPVPLSRAVTAIPVAYL

>gene\_1198|GeneMark.hmm|151\_aa|+|2828|3283 >NVVL01000054.1 Rickettsiales  
bacterium isolate NORP64 Contig\_source1382A\_23672, whole genome shotgun sequence  
MDWSTRQLKAKQLEKHLKSLNIRLPATGWVKTIRETLGMNVRQLGQRCEVSGERISRIE  
ADELNSKLTMATLEKVAKAMNCKFVYGFVPNGGIKDTIEKQAEFKAKSQLRRVSHSMAL  
DQKVSDSAMRNQIKILKEDMLQGNIKRIWEK

>gene\_1199|GeneMark.hmm|193\_aa|+|3283|3864 >NVVL01000054.1 Rickettsiales  
bacterium isolate NORP64 Contig\_source1382A\_23672, whole genome shotgun sequence  
MLFTYAKGATPLSPDEVYNLIPSHLMTQKELDEWEQYNIKAETWASQRKRADFLSTKFV  
VDLHKKMFNETWKWAGKFRTRQTNIGIEAIHIPVELKLLFDDIEFWIENATYHPREIAVR  
LHHRVFIHPFNGNRLSRLVADLYMDYQGQARFSWGSCNLTSDSAQRQAYLSALREAD  
LGDYMHLEFSDS

>gene\_1200|GeneMark.hmm|197\_aa|+|4305|4898 >NVVL01000054.1 Rickettsiales  
bacterium isolate NORP64 Contig\_source1382A\_23672, whole genome shotgun sequence  
MFIQTEETPNPNALKFLPGVDISPETPVFLNSPKEAKTKSLLAVKIFQIDGVGAVFYGAD  
FVTVTKSDAADWGVKPEILLTIMDHLVAGFPFIDEKQKQKTPKVNLDMSDIEKQIVEII



ETVRPSVAMDGGDIVYQGFENGVVYLQLRGACSGCPSASVTLKDGIESMLQHVFVPEVKS  
VEAVESADEEITPSIRD

>gene\_1201|GeneMark.hmm|207\_aa|-|4961|5584 >NVVL01000054.1 Rickettsiales  
bacterium isolate NORP64 Contig\_source1382A\_23672, whole genome shotgun sequence  
LKEFDKEFSMRKEDYWKGRKEFLELNPNASLNPVVLVGEPEGESGGVVLVGTYSIIIEYMTESF  
EDFYLMPKAPLERAEVRKYISWFNDKFKHREVSILIDEKMIRLLMRAGEPRSVFIRAAS  
NLHQHFVFLTNLLKNSYIVSDRISYADIAAASHLSVVDYFGEINWDSWGVIKEWYSIIK  
SRPAFQPILQDRVAGFAPPKDYSLDF

>gene\_1202|GeneMark.hmm|259\_aa|+|6456|7235 >NVVL01000054.1 Rickettsiales  
bacterium isolate NORP64 Contig\_source1382A\_23672, whole genome shotgun sequence  
MSSNMWGACPGITISENPQSKSMVTLNRVTQMSSDRCPPELSRIPQIEFVIQIYKSLW  
QEALSYAAYNDFSRWDEYMNQVQGDLPFILTSGLQYIALRTGQVKIIAQCMWNVKYG  
DDETIMSLDTFLARILMVSSTKYHVNLIVDGLKIADQAMPNHDLDMLRAFCDLAPQHD  
SPEILPKLYTYALKKAVKLYESSHPPEEQAILDSDALSDETGSLLGGLLDNPECVSVEQTL  
LGDASVILSNMPGSSCAIQ

>gene\_1203|GeneMark.hmm|268\_aa|+|7246|8052 >NVVL01000054.1 Rickettsiales  
bacterium isolate NORP64 Contig\_source1382A\_23672, whole genome shotgun sequence  
LLAYIILPFNLKQINTMSSAGEYRLLNAQLPEHTNPNEADVLIQPGDFVADHNTNTVDE  
ALWGQALAEAARGYPKAWKNLTRESGGIPLHMLNGRNLPGIALETNDSSMLAQFMQSLW  
LHEDTPGIMSFSSFLEKLLGVLSKSHINLSIEAVKMADEYRYPYCNLPENVLSELSNLEL  
NLTDLNISKKNYEYTLQEAIGVYKLSYATDEFLATLTESLRNFPALVQLTVTFTTHIAH  
ADQALLGAAESSLDALASDFICPCAIL

>gene\_1204|GeneMark.hmm|113\_aa|-|8127|8468 >NVVL01000054.1 Rickettsiales  
bacterium isolate NORP64 Contig\_source1382A\_23672, whole genome shotgun sequence  
MVKVKYVPDRGDIVWLNFEFQKGREITKTRPALVISSRKYNSKTNLALFMPITSQVKGYP  
FEVELNFAAISGAILCDQIRSLDWKERRATKITKLNKDFLDQAISKLRLLIED

>gene\_1205|GeneMark.hmm|78\_aa|-|8462|8698 >NVVL01000054.1 Rickettsiales  
bacterium isolate NORP64 Contig\_source1382A\_23672, whole genome shotgun sequence  
MQAQIQKWGNSLGIRIPKLLSQKLNLSHSGSQVEIDVARDHLIIVKSSSELDMLLDKINDD  
NRHHEIFDDDKRVGNESW

>gene\_1206|GeneMark.hmm|919\_aa|-|8802|11561 >NVVL01000054.1 Rickettsiales  
bacterium isolate NORP64 Contig\_source1382A\_23672, whole genome shotgun sequence  
MKLYQSSSKENFLEEVARFVIANFAGNFSLNIILPSGLLCNHLQKLLITKLGSTMLPTI  
TPLAGLVAESEEIIFKIPSEKIGAIKLEEKITLSEVIHSYKKGYPDPAQSLLLAPSLANL  
FFEFVNNITLAEKLNIPILDQPEHWHSIYDFLSYASDNWYVHMKSLHKVTRASYQKLT  
RAKLEQLEKAPLDNMLIAGIAGVNMQMTDEFIQDASKLPNCYVILPPSGESSDSAPNRKFS  
PEDALYKIDKLLHLINKEKAPIPALGTGEPTILNKLLTDSACGLLKQRIDYLEFDNIFHE  
ANYIATQCMDALEQNPDSRIAIIVSNLQSKEQYCTFLAKYQLRYHDLLGTDIGKHNAMSL  
ILLIAEHLCCFSLKTFFAILSHPLVNNNTNAQEVKNLIRKYDRLCSSLESISTTIKQHGE  
EHLQYIVKLHESLSAEVKSNNKFASILRLVIKSVELLLPDLWKQNPDIASLSEIVHINW  
SLALKKIDDFPELLKQIISGGRLAETTSDQNITICKSHDAALANYDLIIMADLNEGTHPA

PIHSSPWLSAHMQKELKLDSPAEFGNALYDFYLNLNQKCVLLTRACKHGSMQMLPSPFI  
LQLKHILGDKLNCKTMMQAPQAQMQLTLESAALESTALESTAAQQENSLYATSKIF  
PKQISATDIETLLRSPYNFYAKKILNLRMEEEEIEEKPNLAQFGNFFHEVAEEYTKNYNAS  
EMDKPFAFKEIGQITLSSAPIPEHSKRSWGVKLSAIACEFVEWDEKRRQNITTIYTELKG  
QITLDIKGTPVRLIAIADRIEIDKEGNAVILDYKTGAVPTKKDVLVSLSPQLLTEAIIIS  
GGGFNIGHKEISKLIYVKINSSLPYIKTTEIELSKADIHNHKQGLISLLEHYVTSKSFPL  
EQNLMKYDNYTHLARRGAG

>gene\_1207|GeneMark.hmm|140\_aa|-|11558|11980 >NVVL01000054.1 Rickettsiales  
bacterium isolate NORP64 Contig\_source1382A\_23672, whole genome shotgun sequence  
MDLPEIYALLFTDTLVSNFAFNASSEMVTASMKIFGTYNPYHVILIASAAFFIVSCVNYL  
LGIICYKIVIPFNSKEADLSRITNLRKSRYLIIIMMLSAVPPFGKFVMLFAGFCGVRPGF  
AFTGSLAKLVYYSFFMLAQ

>gene\_1208|GeneMark.hmm|420\_aa|-|12037|13299 >NVVL01000054.1 Rickettsiales  
bacterium isolate NORP64 Contig\_source1382A\_23672, whole genome shotgun sequence  
MNKRETKIFQYKRLKILAHAYKNIPLYQEKWDKAGFHPDQFRSLDDLSKIPITTKEDLR  
HLHVKSIIAKNNKNEHENLRLIGSSGSTGQKLVVASSESKWDYDVLLSSAHYINKRYNTN  
IHKALIMLDFGNRSIESSVERMLGLIPFISKRIKTISYKTKPAKIIILKEYQPDTIYSY  
PSTMSLLCHYIEQNNIEVDELRYVVLTVSEVIFKNLRRDIKSIFNATIIGGYGATEVGVIG  
YQYGDNDYFDLVSWKNIVEIENDKFLKGKHLHTLGTVLVTDLIGFTSPVIRYSGLDLGG  
LIEPKRSGFPALSELHGRKSILLTSCGGAHLSPYSLTSLYQEIKSISRFQIVQSAQTID  
LNLEIHEGLKGDLPKSDKTKINAFKKILGDKIVVKYHIVDKIKKDGSSHKTSVVISHLD

>gene\_1209|GeneMark.hmm|290\_aa|-|13507|14379 >NVVL01000054.1 Rickettsiales  
bacterium isolate NORP64 Contig\_source1382A\_23672, whole genome shotgun sequence  
MFNKPLISFDYAIKFLKNKEGYEIIIEGFISALFAAENYKPKITALLESESNKEKADFK  
RSIADLVVEDTDGNKYIVEIERAFTPNFMHKACFNSSRLIADNLSVSQDYTKIKKIFHIS  
LLYFENEEMQKPIYHGKTVIHEVDTAHPIDLRI MNQGMVTFENHNVFPEYFFISIPRFD  
QINQEIDEWLYVMKNAEVKKDFKSPYMAKVAERLSVLKMDDEERNQYYKYLKESVNKEDT  
LTAALEKGRDEGRKLEKIEIAKTMLAQGLDISLISKISKLSIEEIKELKN

>gene\_1210|GeneMark.hmm|571\_aa|-|14485|16200 >NVVL01000054.1 Rickettsiales  
bacterium isolate NORP64 Contig\_source1382A\_23672, whole genome shotgun sequence  
MIEKKLGLLREQLNKHGFGGYIVPSVDEYLSEFTPSFAKRLEYITGFTGSNGLAMILADT  
VLFFTDGRYIEQAFTQLDDKLFVFDQKLLANFPWEDYLESDCIVAYDPKLLTMRALQSF  
NSISTKPYEENLIDQQWADQPAKPSSKIYDPTKYAGADYEDKISQCREFLQENDAASLV  
ITDPDVCWLLNIRAHDIEFSPLLLANAITMENLYLFTDAGRLDSELLRPDVTILDESE  
FGDTLKQTSGLILFDVNTCSSYIAELIMAQKYKQVKNPCLLWKACKNDTEIMHMQQGHVQ  
DAVAVCEILSFLASGDVSDLTEYDISEKLTRELRAAREGYVFDSEFTICGYRENGAIIHYR  
AQAGSAKKLEESGLLLIDSGGQYMGATTDITRTVAIGEKPSAEHIKYYTKVLKGHIALGQ  
ATFPEKVITGANLDILARQYLWNGRDYPHGTGHGVGSFSLVHEPPQSISLSTKTALEA  
GMVLSNEPGYYVPGAFGIRIENMMYVTKSEHAHFLKFKMLTLVPYAKELIDENMLTDAEK  
LYLKSYYQEINHHVSPLLSSAAQQWLKQID

>gene\_1211|GeneMark.hmm|699\_aa|-|16328|18427 >NVVL01000054.1 Rickettsiales  
bacterium isolate NORP64 Contig\_source1382A\_23672, whole genome shotgun sequence

MMNSMNNTAKIEPEELSKGDARTEIKELSSKLREYNKEYYMEDAPTISDAEYDQLFHRLK  
TLEEKFSKLLKPDSTQTVGSTLQEKFEKHTHIQPMLSLGNFSEEDISDFIGKIKRFLG  
QEDFLPIFCEPKIDGVFSFATYKGLSIGATRGGYVGEDITQNIKSIAGLPNIIPDAP  
DLLEVRGEIYIDKSDMEELNLEREANNKTKFANPRNAAAGSLRLLDYGVTASRPLKYFAY  
AIGGASEKFAGTQEELLDALTKFGFRNTNPRGALAENMEEIFKFYNELLKEREKLPYEIDG  
IVYKVNDFALQERLGFVARSPRFAISHKFAIIAETKLLDITIQVGRTGALTPVAELETI  
NVGGVNVSRATLHNFQEIERLDIRIGDTVLLHRAGDVIPKISGINKDKRPSEALKFTLPE  
ACPSCGSKPHIDPIDVIIRCDNGLNCPKQLSESIKHFVSKDAMNIDGLGKKQVEFFLERS  
LIKNPADIFRLEPVNTASLSKIENMDGWGAKSVDKLNFANITKSKQVPLARFIYALGIRHV  
GVSNAKILAKEFISLEKFVESMVKLASADKATFELLDNLDGLGHKILIEIGNFFECEQNI  
STLKESEILKVSNYQERAAGGVLSGQNVIFTGSLSTLSRREAKSQAEKLGAKVASAVSG  
STNLLIAGEKAGSKLKAQELGVKVISEEEWVQMVNESK

>gene\_1212|GeneMark.hmm|278\_aa|-|18424|19260 >NVVL01000054.1 Rickettsiales  
bacterium isolate NORP64 Contig\_source1382A\_23672, whole genome shotgun sequence  
MQLQKLLKDSLDKALQEDYGIKGDITSNSVIDKDARIKFEIKARQELVVCGAAIVQYFF  
DEYSSIEYKIHINDSQCAHPGDVIISGTGLAREVLMLERVCLNYLQHLSGISTLTEAFVK  
KTHNTKAKIFDTRKTTPLHRQLQKYAVTCGGGHNHRLCLDSSILIKDNHIAICGGIQIAL  
QKAKQNPQPHYTKIEICDTLEQVRIAASEGADIIMLDNMSLEQIREAIEIIQDRTIEAS  
GNVSLETVEALAQTGVDMISVGKITHSAPAVDIGLDII

>gene\_1213|GeneMark.hmm|67\_aa|+|19384|19587 >NVVL01000054.1 Rickettsiales  
bacterium isolate NORP64 Contig\_source1382A\_23672, whole genome shotgun sequence  
MHWSDIEDIASKLEESYAEIIIPEYNLPYLQEMVLSLAGFDDHEVEVSDITLKQTLECW  
DIRNGIN

>gene\_1214|GeneMark.hmm|379\_aa|+|19651|20790 >NVVL01000054.1 Rickettsiales  
bacterium isolate NORP64 Contig\_source1382A\_23672, whole genome shotgun sequence  
LKYHIRYFCTIFKILLDFIFQREYNSESWLGARISHGELGMDKERALQAALSQIEKNFG  
KGSVMKLGQRQDMNIESIPTGSVGLDIALGIGGLPKGRVVEIFGPESGKTTTLHAIAE  
AQKQGGVCAFIDAHALDPVYAKKLGVNIDNLIISQPDNGEQALEIADTLVRSALSLV  
IDSVAALVPKAEIDGEMGDSHMGLQARLMSQALRKLTAISKTNCTIIFINQIRMKIGVM  
FGNPETTTGGNALKFYASVRLDIRRIGAIKDKDEIVGNQTRVKVVKNKVSPPFKIVEFDI  
IYGRGISKEGELIDLGVKHDFVEKAGAWFSYGEIRIGQGRENAKKYMIDHPDVASELEEK  
IKTKLLKPEGDGETKEVEA

>gene\_1215|GeneMark.hmm|241\_aa|+|20835|21560 >NVVL01000054.1 Rickettsiales  
bacterium isolate NORP64 Contig\_source1382A\_23672, whole genome shotgun sequence  
MTNLEGQNVFITGASGGIGSAITKQMHALGAHVYISGSNIEKLEALGTELGDNYTIKQCN  
LADAALCGSLFDDIEKLDVLCNAGITRDTLAIMSDEKFSEVIDINLKANFILNRAAIK  
KMMRARYGRIINISSVATSGNPGQANYCASKAGLIGMSKSLAIEVASRGITINVVSPGF  
IESSMTDILPDAVKDAIMQKIPLKTLGKPEDIANAVTFLASPLSSYVTGQTIHVNGGMLM  
V

>gene\_1216|GeneMark.hmm|79\_aa|+|21670|21909 >NVVL01000054.1 Rickettsiales  
bacterium isolate NORP64 Contig\_source1382A\_23672, whole genome shotgun sequence  
MNDIEQKVINTIAETLKMGEIIIISLESKLADDLGDALDAVEIMMAIEAKFDTEISDEDA

SKMATTKDIVEHIKKNLNQ

>gene\_1217|GeneMark.hmm|415\_aa|+|21956|23203 >NVVL01000054.1 Rickettsiales bacterium isolate NORP64 Contig\_source1382A\_23672, whole genome shotgun sequence  
MTRRRVITGIGIVSSVGLNANSSWSNLAGKSGVKLLTGFDSDFDINKLSCKIASTVPD  
FNPEDYIPPRDVRKMDRFIHFHFGIAAANEAIKDSGWAPKDQEGKDRTGVMVGSIGGGFTV  
ENTAASLHTAERVRVSPYFIPSALINLLSGHISINHGFTGPN SAVVTACSTGAHAIGDAA  
RMIKYGDADVMIAGGAEATVPLGIAGFAARTLATGFNDNPTEASRPWDKDHAGFVMGE  
GAGIVVLEEYQHAVDRGAKIYAEIAGYGLTGDAHHITAPSGRGAYRAMENALKDAKINSS  
QVDYINAHGTSTPVGDGIEVKTQQLFEKNKSVKMSSTKSAIGHLLGAAGSVEAIFTALA  
IRDQIAPPTLNLHNPIPEATMNLVPLVAQETKIDYALSNSFGFGGTNASLVLRKI

>gene\_1218|GeneMark.hmm|128\_aa|-|23353|23739 >NVVL01000054.1 Rickettsiales bacterium isolate NORP64 Contig\_source1382A\_23672, whole genome shotgun sequence  
MLKNPLQLYSLAVCLIACIVIMITSGLMLNLDLTLTKYTYKSHLNNFVTNEKYISYKK  
SSNGKDNDFPANLTTEEIQTERLLARDNYIENRQNSAISLISFTWFLTGFFFFIIHWR  
IYKRSSII

>gene\_1219|GeneMark.hmm|195\_aa|-|24065|24652 >NVVL01000054.1 Rickettsiales bacterium isolate NORP64 Contig\_source1382A\_23672, whole genome shotgun sequence  
MNNIASLPLLASGLLCSPLAGKLLHLRLQFCAILLRPAALMLFCCLAFIIASNANAAKQ  
LPVPRFAAIKFNEVNARTGPASDCPIEWVVFVKKGEPVEIVA EYGHWRKIRDIASEGGVWH  
SSVLSGKRSSVVTAKGTSPLEGIAEYKIVVYLEQNIRCVLQKCKKDWCKIDCKSHKGW  
ISRKALWGVYPDEHP

>gene\_1220|GeneMark.hmm|577\_aa|-|24645|26378 >NVVL01000054.1 Rickettsiales bacterium isolate NORP64 Contig\_source1382A\_23672, whole genome shotgun sequence  
MDIHPLVTVIVLLASAVFIVAIFRKLNLSPVLGYLVAGAIIGDNGMRVVTYAQTSLLAEL  
GVVFLFAIGLELSIERLKAMRRYVFGLSLQVLITSAIIAGIVILLTNDYNAIIISGG  
LALSSTAIVMQVVAETKNKSTQIGRVALAILLLQDFVVVPLLIVIPILGGSSEVTGSLPY  
IVGNSMLKAFVALVIIFIAGRVLLRPLFSFLVPENSEGGELPIAITLLVLTASWGTEHF  
GLSLALGAFVSGILVAETDFRGKAEESIHFKSLLLGLFFMSVGMNIDVMEIYNNITTIV  
SLALALIVLKAIIVTALCILFGFNIGVSVHAGLLMSQGGEFALFGLGKDYGVLDPSVA  
TLLLVVTFSMALTPALASIGQKFAENFERKRGRTPDQILEFGAQLTNHVIIAGFGQVG  
KMVASVLDAEGINYIALDTSDDLVEETANGLPVFKGDATKIRTLKAIGADRALTFVITI  
NNESMVKKISTIIHKKFTDLEMIVRLKLNKNSAELYAIGVNTIIPQDYETGLQLGGAVLK  
SIGVSEYEINRVKGQFRAGNYVAAKREDTLETEEDE

>gene\_1221|GeneMark.hmm|119\_aa|-|26416|26775 >NVVL01000054.1 Rickettsiales bacterium isolate NORP64 Contig\_source1382A\_23672, whole genome shotgun sequence  
MKEDTENLKDFILECLKGKATQIECMELNVAVPFADYMIFASGRSVKNIRAI AEHVTLQ  
LKHEMNLNANFEGAEGSDWVLIDAGDVVVHLFHPETREQLKLEALWKRRNSDASSGSDG

>gene\_1222|GeneMark.hmm|214\_aa|-|26783|27427 >NVVL01000054.1 Rickettsiales bacterium isolate NORP64 Contig\_source1382A\_23672, whole genome shotgun sequence  
LVSEIAILNFEYIFILMKTQNITNLQGLSFMHRASLKVIGLGGTFDPAHKGHLMISNLA  
LKYYNFDYVIWLVANQNPFKQTNKRDIFARGCDAQKIVTNPRIIVSSAEHDLKTRYSYDS

LNKLTQYFPTVRFSWLMGIDNAMNFRKWYRAQDILELCNVMVFDRLVQKRLVNLQSIGLM  
GKAMVAKNERKAIIRDALCDISSTQIRTKLRA

>gene\_1223|GeneMark.hmm|78\_aa|+|27408|27644 >NVVL01000054.1 Rickettsiales  
bacterium isolate NORP64 Contig\_source1382A\_23672, whole genome shotgun sequence  
MAISETKLTILQQNFPNAKVKITDLAGDQDHYALDISCQSFEGTLTMQQHKLKALAE  
VLLSGELHAISIKTRSDV

>gene\_1224|GeneMark.hmm|306\_aa|-|27708|28628 >NVVL01000054.1 Rickettsiales  
bacterium isolate NORP64 Contig\_source1382A\_23672, whole genome shotgun sequence  
MLKRVSLATMFLLLSVILSATEADARKRREKIIPAPTKTSLVVDGKSGRILHSRNARKK  
IYPASLVKVM TVYLIFESLESGRLKLNQKLYVSKYATKARPLKLYLKPGRKISVRDAVLG  
LIVKSANDAARVVAENIAGSERKFARLMTIRARQLGMKDTTFTNASGWHDPKQVTTAVDL  
AKLSIAIKRDFPKYRAFFSKTSFRFEGKRIKGHNKLTATYPGAEGLKTFHTPAGCNLI  
TTATRGNKSLVGIVTGRKNGTIRNRKMMVQLLDKHFVGVKHNTIKRKGKIKTRKMKLADRKK  
RKSRRK

>gene\_1225|GeneMark.hmm|808\_aa|+|29063|31489 >NVVL01000054.1 Rickettsiales  
bacterium isolate NORP64 Contig\_source1382A\_23672, whole genome shotgun sequence  
MTHSKVAQIALLTILFVYSCVASAEIPGLLDTEVSNGLSVEGDIFDFERRGSDDDDSDDY  
DFSDDDFDDGFYHTNSNPPALPLHQGNWNTWRGILNFEGDIFRFEESFRDNDNSDYDNI  
QVAAGQTLQVVYDENLIGYGAIEDVNLKPNNIKGRHLRLVLDLRTGTRGVPRIGTRGIQG  
AGNIIFEGKNRANCWLGSQEQLGFIETRGDTSFVDEIYAQHMSFIGRTTMYSRDINTSS  
IVLKNAAEAFLRGAYNPIETGIGNVIYLRGSRGKIIQSTRGDFVENTISKDNNLSSS  
GTLYLIAETGKETEMTDNIIVSDYQTLGEGTVILNNGYSLTIRGNDLAPLLVDHKSVS  
ISAHGNTSQNIFQTTSQLAKEPSKEPTYKEPTYKERLAEAIRSLTTEITDQEKRMASN  
KIASEFMQLNLDTEEKVAEYSLTAEQVAELSPGAQEAAYMGEATKSQQTLDDDESATKSA  
VLDANNKVAESSKVTLGAVSSRIGELFRSQHLANNTSGTSAGDDGFDIKKGVWVSGIFA  
KNFQKSDENSSGYNSKITGVNIGADAQTENILIGAFYSHVDALVKFNNGSAKGSRLDAKS  
NNWGFYTNISLTDNLSIQAIISAGFTKNSQKKIGALIAFSKPRNKTYSTKLLTYHKAL  
NSSFAIIPKIGLKYSYADAAAREIRSGVQDLMHAKKSSSNLSAILGTELLMQKRISDSI  
TLLPSINASIHQTLSENRSKSKTIFAWGKDNFQFDHATRSKHSRRTTVNIGAGLLAKINN  
IELSADYAVSLRRKYIGHQGFKTRINF

>gene\_1226|GeneMark.hmm|770\_aa|-|31714|34026 >NVVL01000054.1 Rickettsiales  
bacterium isolate NORP64 Contig\_source1382A\_23672, whole genome shotgun sequence  
MTVEKNTLPLLALRDVIIIFPGIIPVFIGREKSLKSLCAKNTGDGQCILLVTQKDQASD  
NPKIEDLYEVGVLAIIQTIKLPNRNAKILVEAVSRVKLSNISGKDMFMADYVVLSDKGS  
KDPKALEATLRTAMDSFRDYAKDSQKISTELLQILSEQKDPTYITNISSHGCKLPVKQ  
GLLEETDILKRAEMLVEAITAENTYIHTENSVQKRLKQIEKNQKDFYLTEQMKAIQNEM  
TGDEGKSEFSLENKIKLNLPEAKEKAMSELKLLMNGASAESSVVRNYIDTLCMDP  
WGKSPVKIDIKNTEDVLDKDHYLEKVKERVVEYLAVLKRSDKIKGPILCLIGPPGVGK  
TSLVKSIAKAMNRKYAKFALGGVRDEAEIRGHRRTYLGSM PGKIINLLKSKVDNPVMLL  
DEIDKMSSDFRGDPTSALLEVLDPEQNSHFTDHYLEIEYDLSDVVFIATANSYDLPRALL  
DRMEVIDISGYIEEEKMQIAKNYLVAKQLENHAIKASELKITDETLELIRYYTKESGVR  
ALERSIGALARKVLTKILKNPDIKSVTIKPEDLEEYLGVKKYRFLAEKSNQIGVTTGLA  
YSEVGGDLLSIEAVSFAGKGDIKSTGTLGDVMKESAEAAHSCFLSRTESLGLKAKDYKDI

DIHLHVPAGATPKDGPAGIAIYTTIVSLMTKKPVSKDVAMTGEITLRGKVLPIGGLKEK  
LLAASRGGIKTVLIPEDNVKDLKDIPDNIKNQLKIIPVSTIEQVLENALV

>gene\_1227|GeneMark.hmm|351\_aa|+|34048|35103 >NVVL01000054.1 Rickettsiales  
bacterium isolate NORP64 Contig\_source1382A\_23672, whole genome shotgun sequence  
LYIKSLINYIIAWHYVFKIDYKCNISNYKNKMTCTIQHPEIVAKAYARIKDYVHKT  
PLWHSDSLNEKLSQIYFKLDSMQKTGAFKIRGVLNLLSLKELGKLPKIVAYSTGNHA  
IAMSAAKLFDIKARVYLPKNVAPVKKRIAESYGAEIIEVATRKEAEQLSNRDGKAGYHY  
LPPSDDATIAGAGTMCYEALVDMIELGKKPDAIFAPCGGGGLLSGTYLAKELLSPNSEV  
HGVEPKLANDAYLSLTSREIFKFKDAPETVADGLTTPSPARTLHYLKKLDDFHLIEEEE  
IRHWASRITEMTKVTCEPSAAISMAAAHSWIQTHGKDKVVLVITGGNVDI

>gene\_1228|GeneMark.hmm|30\_aa|-|2|91 >NVVL01000055.1 Rickettsiales  
bacterium isolate NORP64 Contig\_source1382A\_23701, whole genome shotgun sequence  
MATPQTALNSGQPTLVPDAMQATSMGDILA

>gene\_1229|GeneMark.hmm|463\_aa|-|122|1513 >NVVL01000055.1 Rickettsiales  
bacterium isolate NORP64 Contig\_source1382A\_23701, whole genome shotgun sequence  
MAGQSLTSILPALGFLDAVVQDNTLAREFYDALFPELLYRAEAVPERWEANLGERMVFTR  
SSLLSASTSPLTPGFDPAPESPAYEQWEVVAQYKSLDTNMPASRTALASLFARNAKTL  
GLNAGQTLNRLARNKLFVYVGGSTLTTAAGVAITALPVSSVNGFGTVIVNGQIVPVSGT  
NPKSTTVSGVAGTVDVVAATPTNPLEPNPGLTAAVATWAIDAVVTASDAPTILRSGG  
GTSVDSLSTDLTVQNRDAVATLRRNRVPPHEDGYHCHLDPPIAESQLFADNEFQRL  
QSLPDDFRYQRFAGRLANCVFYSNNEPNSQNTNTLVATRGSFAFASPSLGTEVINDAGV  
AIIRTIITGGSAIMEKWVDETAEYASEAGYQKVGAFSVVNGIVVPIERARYIIRAPQD  
RLQQIVSQSWSATLDFGVPADLLSGLTGARFKRAVTIESGSAL

>gene\_1230|GeneMark.hmm|186\_aa|-|1532|2092 >NVVL01000055.1 Rickettsiales  
bacterium isolate NORP64 Contig\_source1382A\_23701, whole genome shotgun sequence  
LGDLMKDPVIARELAAATKRQVDAVDAREKELTQAQERSKMEETERLRAEKADDEEGKRI  
KAENEASDLKIDSEFATCFKSGVTLANPQSIDFIKAEARRTMDAEGLSMDACVADVLSK  
HQYLVTQPQAPAAVAQQLPEVLATTVPPAQARHTETPAAPAPQIVVDTRGMTSQEYRKYR  
QETHGF

>gene\_1231|GeneMark.hmm|90\_aa|+|2094|2366 >NVVL01000055.1 Rickettsiales  
bacterium isolate NORP64 Contig\_source1382A\_23701, whole genome shotgun sequence  
VSGGSSGAVVGAGAATSATTGGWGCAGAATSTGGTSATGGGATGASGGASGLGFGVGVPG  
TDMNGGYHPHWSGRNATYKLSAPVITPLGS

>gene\_1232|GeneMark.hmm|141\_aa|-|2638|3063 >NVVL01000055.1 Rickettsiales  
bacterium isolate NORP64 Contig\_source1382A\_23701, whole genome shotgun sequence  
MAGITVTDGTLSQLQADQVPGCPPPGADLITFPLALFEQGLTGIAGASGSEISQGCFTI  
NSAASFVTLAYPASLRARIFYLRALPGSGALDVRLLTHSVAGAVTYPDQYLMLVQFSAVEQ  
LTAIEVQGVGSFAWAAVGVLV

>gene\_1233|GeneMark.hmm|335\_aa|-|3256|4263 >NVVL01000055.1 Rickettsiales bacterium isolate NORP64 Contig\_source1382A\_23701, whole genome shotgun sequence  
MCSVVADCPTLGRLEKLDNVRLHTMHEFDHLLVDGRNMLYRAAWSNQMLTHRSPLTGGVF  
GFLRTLAAAYRDFGCPTIQVCWEGKRNWRFRFPAYKGNRSRGRPRDDTGFDCAAVASQQ  
PLLRELLALAGIAQWRTPDGECDVLYARGEELAADGETVAVLSHDRDMYQVTTNPLCSV  
IRTDKDGDWHVVDRTVCEQELGGPPEKIPALKALAGDSSDNIPGVRGIGPKIAAKLMVPH  
TSLSELLSSARSGERWAGSARQRSQVHDAEDVSIFEEIVRLQMCELELSPEHHYPEKVD  
LQAALEDLGILTAAEEGPLALCSMGGTQLFGEKH

>gene\_1234|GeneMark.hmm|67\_aa|-|4559|4762 >NVVL01000055.1 Rickettsiales bacterium isolate NORP64 Contig\_source1382A\_23701, whole genome shotgun sequence  
MFPKNTPKPRLTVLTKTTLRLTSAEVLALILAAERVLGHTIDSDASVSLYEEGATIQT  
ETEDDGA

>gene\_1235|GeneMark.hmm|172\_aa|-|4780|5298 >NVVL01000055.1 Rickettsiales bacterium isolate NORP64 Contig\_source1382A\_23701, whole genome shotgun sequence  
MRLVGICGYSGSGKSIAAALRQDGFHVYPMAQVLKNMLRAFGLSEAQVCGDQKAVELDL  
LGGKTPRHAMQTLGTEWGRDLISHDVWLKAWWTWKVHIPAVVCDVRFVGFNEAEFIRAQGG  
RIIKIHRPLGSGALPQHPSEQLAFRPDIEIVNVGTVPPELHKVRQALVNAGV

>gene\_1236|GeneMark.hmm|125\_aa|-|5286|5663 >NVVL01000055.1 Rickettsiales bacterium isolate NORP64 Contig\_source1382A\_23701, whole genome shotgun sequence  
VNAEFLPKYLALVREHNKLHNPQPGEQHTRLLRSILGCAAESGELASAAMQSSISNNCDID  
PLEALDEFGDVLFLNLRGLDALGFDLELAMMANSSKLISRALRGKNKPSERRVLENLVSE  
VACDS

>gene\_1237|GeneMark.hmm|227\_aa|-|5683|6366 >NVVL01000055.1 Rickettsiales bacterium isolate NORP64 Contig\_source1382A\_23701, whole genome shotgun sequence  
VRSPFKLAAFLKYAGGKWATSHRYPKPLSRTIVEPFAGSAGYSVTHSNRRVLSDTDERI  
VGAWDWLIKARASDVAALPLLAQDERVSDLSLPQEAKWFLSYRVNIAAGPRNTATRWRMW  
NARVRRRIALQVHRIDHWRVYHRGYADADEGPATYFVDPPYQEKSFYREGVADYAALGAW  
VRSLSGQIIVCEGPGASWLPFRKLLDAKTHVNASAAKVPELIWYRCQ

>gene\_1238|GeneMark.hmm|212\_aa|-|6363|7001 >NVVL01000055.1 Rickettsiales bacterium isolate NORP64 Contig\_source1382A\_23701, whole genome shotgun sequence  
MPRKSKPTTFDYIVPQLQSLAIPADLEFDTKNTRRHGKKNVEGLRASLQRFKQYLPPIV  
QEEGMVIRIGNCRTQAALDLGWTHIAAVVVPESGVDAVARAITDNRLGELGEWDWAVLTE  
SLQEQELGLDELGWDPEELSALLETFVSVPEVDLDDPEPPQDSSAPGESSELGAGSSDKQP  
TLTLGVEASKVLRASAGRADLSPDAYVLSLA

>gene\_1239|GeneMark.hmm|84\_aa|-|6985|7239 >NVVL01000055.1 Rickettsiales bacterium isolate NORP64 Contig\_source1382A\_23701, whole genome shotgun sequence  
MPHDNLKTKWPPGTSPQLQLFSALVTRIGLTNIKGVAVFVRYVGDDNDGGVSTQNAV  
FTAGAEVDSVYDWMKEVTRDATQE

>gene\_1240|GeneMark.hmm|94\_aa|-|7221|7505 >NVVL01000055.1 Rickettsiales bacterium isolate NORP64 Contig\_source1382A\_23701, whole genome shotgun sequence

LITDPDFPGYPVTVIEYVDATLNPDCVWAFHVLVLRGWASTLTAHAVKAADDVTPQQ  
PERACVLLQAAERIGRAVQDIEAAKGYVPCPTTT

>gene\_1241|GeneMark.hmm|248\_aa|-|7495|8241 >NVVL01000055.1 Rickettsiales  
bacterium isolate NORP64 Contig\_source1382A\_23701, whole genome shotgun sequence  
VGCDIHLNLVKKVGDWELLSPPLNEESKALYPNHSDYWHAWPCDQRSYDCFSLMTDGQVR  
RSDDPVLRGFTAPRGWAGVEAQFGLIPDPDDPSWRGWEVGDHSFSYLTLDGFTSFRSAG  
GWERFTQARNCTCTAAGVEAWWAADKTPSPWSYDHRLPTGVPQRGRVAEEFIRKYIDTTS  
RQQRAVDNTQARLEGYTGGHLDRYVVVTVSETVASRCSGLLELSELMAQYANEPGTDDV  
LLVFSFDN

>gene\_1242|GeneMark.hmm|76\_aa|-|8587|8817 >NVVL01000055.1 Rickettsiales  
bacterium isolate NORP64 Contig\_source1382A\_23701, whole genome shotgun sequence  
MTTQTDMLDTLPGYVFWYAPHVPHYPYRWAVAQVPNGYEKRHGSHHGGASTQALALVAA  
ETHASVVAADGFLHPA

>gene\_1243|GeneMark.hmm|69\_aa|-|8830|9039 >NVVL01000055.1 Rickettsiales  
bacterium isolate NORP64 Contig\_source1382A\_23701, whole genome shotgun sequence  
MGLGIVGALIGEAIQLGDLRAALAAALRDVAGKVERGELVSDDEIEALRGSTGRIREM  
LKRAGNNSS

>gene\_1244|GeneMark.hmm|133\_aa|-|9040|9441 >NVVL01000055.1 Rickettsiales  
bacterium isolate NORP64 Contig\_source1382A\_23701, whole genome shotgun sequence  
MNHALHIVFALVAFTGCAGTQRSHAIRVGHIAKEVVDAGAVAVKAHIDARASACAPRVDD  
GTKALTDCLGPIASHPDEVDGAFAAARAAQLGVYLAVSTDASP AEIKQARNDLEAALRAV  
VALIQSVAAQEAE

>gene\_1245|GeneMark.hmm|186\_aa|-|9480|10040 >NVVL01000055.1 Rickettsiales  
bacterium isolate NORP64 Contig\_source1382A\_23701, whole genome shotgun sequence  
MITPTIFGCDPALTTGFLIDAAGDIATFGHWCNKAPHEGRKAEDRPRRDQIRAHTFAQQ  
LRRILDGYPTIERLAYEWWKHTSTAQSQLYAGWRALLAECHARGIDVWPVAWSTLKS  
V  
AYEYAEPSEIAQVKATKVKAEERRLASKALIIVAAKRRWTNAPFTEADGLWVSEACRLG  
RGGGKA

>gene\_1246|GeneMark.hmm|536\_aa|-|10037|11647 >NVVL01000055.1 Rickettsiales  
bacterium isolate NORP64 Contig\_source1382A\_23701, whole genome shotgun sequence  
MRVKNLIVQGLTTHKATDIALPSQGLVVITGDNGSGKSSLVEAVSLCRFGKSLRGTDLWA  
GPGELVTETYDGVTYRRKRTASGRMTFKTDGGPEYQTATRAQRELGGDHKLWMRSCVLSF  
DDVVSFTRATDSERKKMLEGVLGLQRFDAALQQVRGELVTARSAHQLATHAVDVAQQQEH  
AAAGVLSILQAQLGEGAPTSDEPVARNVTSAVVDAEEARDDEEVTREQATKCREQSSAL  
GARIALLGNQIGAEGDAECHACGRAFDNHRPDTIAELVEQRRELTAMRDEVIMEGKKWLS  
DAEKHQKNAEVSNRKAECARDDLRAHGEYDARCSRLQTKIDEASVKNNDAGQHVATLRVA  
EDSACADTSVLEAAEQVLGLRGFRSHVLALEGLEISANYWLERFSPGVQVRVRPTREL  
KGGGTSDEISVEFTGVGGGHGYKGC SRGERRRQDVAITWALGELEAAASGHAESTVWCDE  
PFDALDTQGV DALVSALTEVRERRCVVISHSADLVEALRPDMHYHVEDGVVHRRR



>gene\_1247|GeneMark.hmm|138\_aa|-|11595|12011 >NVVL01000055.1 Rickettsiales bacterium isolate NORP64 Contig\_source1382A\_23701, whole genome shotgun sequence  
MSTDQERLNHLAKVVVRQGERINQAIEQWVTQREAAAPHSDKAELNGRIQAAMALSNGLR  
DDLESLMSISDVYVIAGKEVPEASLAGMSELDTRRKLITMAEAEMWQSKATELAERGG  
RDESQKSDSPGSDDTQSN

>gene\_1248|GeneMark.hmm|901\_aa|-|12008|14713 >NVVL01000055.1 Rickettsiales bacterium isolate NORP64 Contig\_source1382A\_23701, whole genome shotgun sequence  
MPETRLKLYNPSTSDPEDLLHEEERVERSSACARCDLHSKAQLVGASADGQAGLLVLGE  
YPHADEAKYCKGRPFWSKSGKYVRRQVAAHWSGPVVYDNAVRCPPQKVPTDTQTRKAADA  
CRTFTAGILDSSQPERVLIMGQSLQTLFGRGTYPRVRRGYQWLRFNGRAIPVFFLPKLN  
PTFGNRLLMRNWQEDLKWALTATPEQPPWETSTTMVRTEEEARAAIEDLADSRCAIVDVE  
TYGDPYSDDFVVLICISAGRLDNDTTYTWSTRRKDTEAIGPILLELRNPSVGLGGHNFKFD  
VVALEQYFGIECEGKMVDTKLLHRMLDCTQQADLNACSDQVCGGKHAEAHFHVEAAVKL  
IRKHRRRVKDLGPDCLYPARLDLATGLVAAEPTIPDRDRAMFAHAVAMWDHHPKKYAYA  
FMPRDVLHRYCARDVMATGRVWRGLWRELCGTPDVRLAWEALVQPATRTFSRIERNGIYV  
DVPALDAFRDFLAVRETQTAIEISVHSSKYFPEGFNRSAPQLQKLLFEDLQLPVVKRTP  
KGSPSSDAEVLKELKGHHPIVPLLEHRTITKLQGTYGDLAPHVASDSRIHCNFNITGA  
ATGRTSCTDPNMQTIPTKGEYAKQIKNVFAAPFGYKLVQFDFSQLELRVAAMLSKDPVMR  
QIYVEGRDYHDETAAMIAPTAWDVVFEKATDEMWTQDPVRAQLMDDIRRAAKVVNFGLLY  
GMGDVTLAKATKTSVEQAMAMRKAIYGKLRVLEAWIKQCVSTVRQRGYSSTWWLGKPARR  
RYLWDIAMEGASDHASKARSNAENGAYNSPVQGTASDYCMASLNAIDAYLRDEGIDGKIV  
MTVHDSIILEIADAQLREAVPAIERLMTQWYADGVPLTVDCEVGQTWGALKDWDTWLHEA  
A

>gene\_1249|GeneMark.hmm|396\_aa|-|14706|15896 >NVVL01000055.1 Rickettsiales bacterium isolate NORP64 Contig\_source1382A\_23701, whole genome shotgun sequence  
VKVAIIADVHVGHNHRLFSGPNIGGLNERARDTVRVLGAAVQSAWRDGDADKIIIAGDLFDT  
DTPTPAVIAAVQLAITWSAAWDHKARMVLLNGNHDMTSTAPLHTALAPLQCMRGAIIVCE  
PCSFHDADQGDVVLVPYQPGPACEWLPEAVEKALTTLSPTLTDYNDTSLAGTTPRSRLVL  
HLGLEHKGTPPWLRGADDSIHIDRLRKICLEHSISNVVAGNWHGAWSENHGGITMRQVGA  
LVPTGFDNPGVEPYGRVWVWTTQEGFTSDTVMKGRPFMKFTDIKELTAFETDVRTDPKYG  
HDFYVHAQLPAHEWVWGGKLLDRLSVESLIRGFKTSKQPAEVRARAAQAVGVSADLSSLG  
AALFDYIAETPLPEGADLARVHQHCRLLKLEAEDA

>gene\_1250|GeneMark.hmm|332\_aa|-|15893|16891 >NVVL01000055.1 Rickettsiales bacterium isolate NORP64 Contig\_source1382A\_23701, whole genome shotgun sequence  
MKDMV GALNAGKDAPGASVLSKGAFRSEPSGFIPITGIEEVDKYVLGCGGLPLGRISEVYG  
APGAGKSSFVYSLRQCQLMGGIPVLIHTEEAQKSRLVDTFHMDPDNICEPRDMEGV  
VDALQRLVLPILKSRANKPPVLCWDSLAATKVRGHDEASKGEGPAKRARILNAALRVL  
PQIIAEVQGHFMIQVQREKVGVMFGSPKTQPGGKAPKYVSTFRLELTYVGVKVPAPHT  
GIEVKIEATKNKMAPPYRKLTSRFDVKGWQDWGVLKLAELKLV PATARSVDDARAKLD  
EISWDPNAPVPEEKLGPAPDEVWDEEVEEES

>gene\_1251|GeneMark.hmm|300\_aa|-|17052|17954 >NVVL01000055.1 Rickettsiales bacterium isolate NORP64 Contig\_source1382A\_23701, whole genome shotgun sequence  
VLRELALFAGAGGGLLSKLSGHRTVCAVELDPYCRVLLQRQHDGWLDLRFPIWDDVRTF

DGRPWGGRCDIVSGGFPCQDISSAGSGEGLAGERSGLWFDMLRIIGEVPRPRFVFAENSPR  
LRTLGLGTVIKGLASLGYDARWCVLGARHVGAPHRRDRMWILAYAQGERPQEGREVQRDR  
EVQNLGCDGEAWLANANDTGQRVRAIDGETLRPLPPVARLGSEAVANTHSEILREQSGRR  
SGASTAVDRGALQTGWTPAPIARMDDGMAHRVDRTKATGNGQVPAVAALAWATLSAGLV

>gene\_1252|GeneMark.hmm|73\_aa|+|18047|18268 >NVVL01000055.1 Rickettsiales  
bacterium isolate NORP64 Contig\_source1382A\_23701, whole genome shotgun sequence  
MQETRTITVELPLVVVELEVTLDPDGFEATVHAVRQSTGAPNWSPCDVNESSVDVLEEI  
DRLAREAFAPES

>gene\_1253|GeneMark.hmm|299\_aa|-|18265|19164 >NVVL01000055.1 Rickettsiales  
bacterium isolate NORP64 Contig\_source1382A\_23701, whole genome shotgun sequence  
MNALKNYADGWSEADVNKEVEDTKQEKSDESDFLAIAPDTELSLRAMPNAKGGSPFVKFA  
KHFYQDPTTGKYVGFACPAKSRLAGFQQYACPTCEASARMRKSRIKADRDFGYKMKAKWR  
ALINVYVRPNDAAVQAAMDDGVDPPKQGMKLWEISSWVGEKNGKNMHERLLALRNNPRVG  
GNYVDPSAAGFDLLIQRQGENINTRYEVHALLSERKPLLPDAAAQALIEDGQLDIAWYI  
APPTLEELSQILQGEKRGKKSQAVATGASSNPQLPAGGETAGEVIDVEDVGGDTGAGF

>gene\_1254|GeneMark.hmm|167\_aa|-|19161|19664 >NVVL01000055.1 Rickettsiales  
bacterium isolate NORP64 Contig\_source1382A\_23701, whole genome shotgun sequence  
VPTIHDWQVEAYLHESVSLDRTDLNREFARVSSDLAYWGEKYAQAERCHAEAKAEHEQVQ  
ARLYRQVRVLEADAAKASAAPTKKAPARVTDHVESEVLTADYAVAYQEVIDCESAK  
TRVRMIIEAVKTKRDMLVSLGAQLRAELRGEPHIKDPDWDDWKKTTP

>gene\_1255|GeneMark.hmm|326\_aa|-|19668|20648 >NVVL01000055.1 Rickettsiales  
bacterium isolate NORP64 Contig\_source1382A\_23701, whole genome shotgun sequence  
MKFNYDSDTGELCLEALLAPSQAATIFEMLSTMGAAKDPMSDALRPAGTPPTQRQRQMED  
AADLAGGQLTVTHACGGEPVLVSKADEPLGVPATAAPVPKVPRRTKKKPPTNKPQAKPKS  
KAVEETPPETPQAPEKTPAKLAAEDEDRAEHAQRWRGKNLFKDELVVGFAVIGADYTV  
VLELESGEKVVLDSDNEIKRVAPTSGLPEHESAAGDFRTGDTADAPPQAEPTTQPTAPP  
ADMPQGVARAQVRAIVQPFVDQAGGGRGKEFALGVVNAVVKCSPHIAKFEGMEASEVRK  
RVVQVLAVLAVINHEELGEMKAEMGV

>gene\_1256|GeneMark.hmm|316\_aa|-|20660|21610 >NVVL01000055.1 Rickettsiales  
bacterium isolate NORP64 Contig\_source1382A\_23701, whole genome shotgun sequence  
VTQGFDRDGVKGNVREQLAAVQAAFEQYDGGTGGEDARVRCPLCIDRTGKEDLRGCLSVN  
LDNGFYNCFKCEAKGRLEGYSEWDYRDREPVVDRPVMKLPYDFVPLIKDYEHSILYRASA  
LYAFSRVRDWQTIQDIGVGLAGGRLMVPVRNNGQHLGHVARSIPGQVPAYLPDTKYVYPK  
GFKREHLLFNEDALDVRSEYLMGEHKGLPVVVVEGVFDALPHWPLAVACLKPTHQAQER  
ILERCQRPVVVMLDGDWELGKSLAQRLFKLGIEASWVKLPPGQDPGNYDIKVMRRVLT  
AAGKPGQGFLIRTTDDT

>gene\_1257|GeneMark.hmm|464\_aa|-|21607|23001 >NVVL01000055.1 Rickettsiales  
bacterium isolate NORP64 Contig\_source1382A\_23701, whole genome shotgun sequence  
LVVSRAGMQDANASHLSVPIGHTVPRPYGLPKPLERSTVHWCTRSEDFWYSVGHVLEPAG  
LGEACARTVLEHCIALHRADTVPTDAGVLSSMVMLRDRGRILTQEVMEDTVDYLDLIEGSA  
MAEEATLQAIAPVLRRRKESEVVDALIKAHAAHQPLDDLVDALQTVQLIGTTDAHPGMFL

DQDV FARIDRLRHVERMSLGMKELDI AVEGGLGRS QL VVFMGKAGDGKSMALINLAAKAI  
CSGMNVAMASLEEEVW TARLLANLTGVPTNDILKGSWRDASQRLRELQEGVGLGRFAV  
KWFPPRSTKWSEVKAWYARVREEMGGLDLFGSDYADKILSDGRHDGTYGAMGEVYEEHRL  
AAVEWGCWAATASQKSGVKGKADVDDASDSANKGRVTDMMIDLEALEDGNEMIA RVIKN  
RHGPSRMEIGPFVTDWARARISASDVHAGSHAIQAAQPDFGAGW

>gene\_1258|GeneMark.hmm|254\_aa|-|22995|23759 >NVVL01000055.1 Rickettsiales  
bacterium isolate NORP64 Contig\_source1382A\_23701, whole genome shotgun sequence  
LALTPPRAAVSGSERQARPRSTSADWDQLKAALKSPSEPIRPVSAELFYREVPKLAED  
LRLAQVPRPPKISLGTVSNTHAVECALWLKAWIYQHYGTAIRWTRRTRFDKRRNWKAMAD  
GIVLLQKHHSAPRWISFVSQMPVVTESVTAPSCAQIFSRGIVTSQLDYCRRASTELGGR  
TVMTPAARKLAHDHSM MVQDLRLTRASEPPAIRAIVARYFPGGSFARRVATVAAEADHER  
EGMSKALTEVTWIW

>gene\_1259|GeneMark.hmm|621\_aa|-|23963|25828 >NVVL01000055.1 Rickettsiales  
bacterium isolate NORP64 Contig\_source1382A\_23701, whole genome shotgun sequence  
MWL RVNNLYTTIAKAEVQEIQLWNLFLSYEDSARERAMGVGTVRLLSKRHRFP TGLVPL  
VEKHAKAAGFDVKRIDTRQRPHPRNWDEHLADAELGWLKTRLLDGRPYQFDAIVAAIKSG  
RGIIRAPTGCHARGQKILMYDGS PRAVEDVRPGEYLMGPDGEPRRVAHL CRGRQKMVRVV  
PKKGD PWV VNL DHVLT LVRTNDDTSLAGKLV D VRVRD WLDWSRTKKHVHKLVR CAGLPRK  
SSVPGVFTEDLNQFGFTVEHLPEDDYFGFTLDGDGRYLLDFTITHNSGKGEMVVGICKA  
IPCKWFLVHRSHLAEDIQQRWEARGDGS GHTWLGRGNWELGDRVSFCTFQTL YRALS NP  
ECRNALQHVQGVVIDETHVLPAGSFMEVSEAMPNAYYRIGLSGTP LDRGDGKSLMAVAQT  
GSVVYNVTPRSLMDAGFVARATVRVTEVKQKGLASRTWVAVRKAYIAESAVRNAAVLRD  
VLACQKPAMVFDLLSHGRILRDAIEQAGLTFEFAWGAASKANRAELVQRVRDGDLDLVV  
ANGVFREGVDIPSLASVVYACGGKSTIQVIQGAGRGSRV TANKTEFTIYDYLD RGH RWLE  
GHSDARVRIYTRYGYSVLSST

>gene\_1260|GeneMark.hmm|61\_aa|-|26082|26267 >NVVL01000055.1 Rickettsiales  
bacterium isolate NORP64 Contig\_source1382A\_23701, whole genome shotgun sequence  
VSIAAQMAAQGYLTISGAADRAGVPYHTMRNWMFKGLVASKKKAGKSYISLTSIEVFLAE  
E

>gene\_1261|GeneMark.hmm|223\_aa|-|26264|26935 >NVVL01000055.1 Rickettsiales  
bacterium isolate NORP64 Contig\_source1382A\_23701, whole genome shotgun sequence  
MTVDHITASSLPRLVTP LNTIRDAPRNSNVMPVHKYAALKKFIARNGLAQEIVVYREDPT  
SSEWVITDGHRVRLRELWDPSSVPCLDASGLTTVERIELTSLN NNRGQLDLSLVST  
EIDFLEAGRELVDLVTGFTIDELEALSGATLELDEASLLDDAMATEVARDKPKV FVL  
EVTLATARELKLAKGRLRRAGGKGNRDLAKGFRAIAGLDGDDQ

>gene\_1262|GeneMark.hmm|211\_aa|-|26925|27560 >NVVL01000055.1 Rickettsiales  
bacterium isolate NORP64 Contig\_source1382A\_23701, whole genome shotgun sequence  
VARVMTAIHIAAVGSVVRDIAEKFAIRSHRGAQGVEDLVQEGWLHALPAYQSYWVKCEPQ  
SVKGLRGWVYRVVYVRVSMYMWKTGIPVSIPKKAIPPQVRYGRVGRTRLLSEDPDWQSG  
GVDTDRCGIEEYARTQRRDAVDVAMGRV LMDYPLARLPLKQALS VRVA AKLLGKPELLP  
ELRRQTAEARKALRRELEPYREPYRKT FNDC

>gene\_1263|GeneMark.hmm|286\_aa|-|27561|28421 >NVVL01000055.1 Rickettsiales bacterium isolate NORP64 Contig\_source1382A\_23701, whole genome shotgun sequence  
MTDIHPSTTVRNDVSAVSDGQSTGCIVYWLSGRVPATELLTALEDMADIPPESGPKLAG  
EREMLARAVKIVAGRREVLLDSCRGDFQLVYREEPDGGASTPVYSGKLRVHLGDDGEVV  
YSDSAHPLCAEISNEYSARRGCFDTREISVWLTELLDKSHAVRMRPRGGFYYPGARVLQ  
FRAAVMALRACSEHVVEIPAMSSRETAEAIIISALRHEVEAATQRAQELMEGSPGKRARR  
THLAELVKV KIKLGAYA EFM DGTLDG VITALDNASAVVSQTLLEGE

>gene\_1264|GeneMark.hmm|410\_aa|-|28459|29691 >NVVL01000055.1 Rickettsiales bacterium isolate NORP64 Contig\_source1382A\_23701, whole genome shotgun sequence  
VGPTPPQSKKTMANQSSIVKASLFTPGLNGRWGLPLIAWGEPEGVAKSGMIRDIAHECGLG  
FNSTIASICEPADLAGYPIPNEERTMVNALPPPWIHKVNMMSGAVQLFDEATSCSNAAHA  
ALMRITLEGKAGDVDVNPRVRFMMAANPVDCAANAQELAIPLANRFGHLQWDPGDARAWV  
EWLLSGSEDNSPPVMSALAREKLVMEAWPEAFADAKGLVGAFISERGSVLHKMPLVDAGE  
SSLAWPSRRTWEMATRAYAGGLVNGLTPAERHLFVTAFIQGPAGEFIEFVKNVDLPKAL  
DVLGKVKFTHAPVRLDRTMAVLSSCAAYILSTHTEEGSPEHDQWLSHVDAYWALCLHVT  
EAKAAELIIPSAKMMVLKRWDTRLFAGNKSNAFAVMSRIEPLITKVIKVA

>gene\_1265|GeneMark.hmm|456\_aa|-|30375|31745 >NVVL01000055.1 Rickettsiales bacterium isolate NORP64 Contig\_source1382A\_23701, whole genome shotgun sequence  
MARRSRSRQDTSGPGFKMSVARAIVAEKAPYFGTVLYSMYPVKVDKIRRKVRKGGQLCVE  
ESDTFGVTEKGLLIYTEKALNDWSEDNLVFLAHETMHIMLEHPSRAATMGYDAALYNIA  
ADIFINDQLRQGNWTDWPATICWPETWGFDSGLLADEYYHLLQKRAEQQEKKDQRSAEG  
PDSKPGVEVDGEPDLTEMGEALNGDAFGHCGSGAGNPLENEGDLTEEARAAERSPAEMEAI  
RQQAEEELADHIRRHPTIPGGLERWAAAKLGPVKVSWREHLRRASRRAVQWVAGAQDYR  
YGSVHRRQAGFGWGPRSIMPTMVAPVPTVLLAVDTS GSMGAD ELGIALREADGLFKSMK  
CQITVVSCDAEINELVECRNWKEAAKSLKGGGGTSFHPIFEMVDRMNP KPDIVVVATDGG  
GPAPASAPRGYKVIWLLTGEYSQSPCDWGFHIKVG D

>gene\_1266|GeneMark.hmm|98\_aa|-|31745|32041 >NVVL01000055.1 Rickettsiales bacterium isolate NORP64 Contig\_source1382A\_23701, whole genome shotgun sequence  
VPTVQHWLQMVHTHTQAPPHSDAGRFDTTIGSETEAERIGKLVGARM LDGDEATKSILLEA  
ARSQGLSIP SVMHTARYTVRVAR IQAARARARVRLGGA

>gene\_1267|GeneMark.hmm|78\_aa|+|32113|32349 >NVVL01000055.1 Rickettsiales bacterium isolate NORP64 Contig\_source1382A\_23701, whole genome shotgun sequence  
MDKKTPEILLEARES LAPGYATDLLLAFVEYLPENRASHKELEPTDAGDLFRTLVL EEN  
WSVKKARAVYDAAYEVVS

>gene\_1268|GeneMark.hmm|289\_aa|-|32467|33336 >NVVL01000055.1 Rickettsiales bacterium isolate NORP64 Contig\_source1382A\_23701, whole genome shotgun sequence  
MVTHPTPELLEAQHEHLAALS DKAARAARRAVARAMADLRRGIDSIPGADYGGWTTATR  
QAMEIQLRAAMAQLTAGTAQGMATVHVHAVKRSYVDAKRWLGS LDRKFIGVAKPLRFDLA  
AHVADENRFLIDRYKRSLSYWGQTTNVMRELLADQALVGQNWADA AKHLKRKIPALAGK  
KLWMVERVAATEMANAYNGTAWRVLMEQDKPHDRMSK KLVATFDKRTARDSKALNGQTVL  
VDLPFINV DGRGYMHPPNRPHDREVVVGWRKSWGNHDDL LGEIASLDVT

>gene\_1269|GeneMark.hmm|45\_aa|-|33336|33473 >NVVL01000055.1 Rickettsiales bacterium isolate NORP64 Contig\_source1382A\_23701, whole genome shotgun sequence SAKPPATGTVKTKKKPSPKAPGKKKAPGKGSQAQGSSEGGTSGDS

>gene\_1270|GeneMark.hmm|362\_aa|+|1|1089 >NVVL01000056.1 Rickettsiales bacterium isolate NORP64 Contig\_source1382A\_23747, whole genome shotgun sequence NMKLISFLFTVLVNLNIAYGFDISKDILDKLDRAIHNNPNDAAYNHAATELNDSHQFKE SIKVCQKALKIDSKDAFCYMEISRSYLELGKKSEALKMVEKSIKLPNINFALYQKIFVL DSIKPKKELVKLGYKILEKNSDKLAYIVLIKSLAGLGKKREMISAAEKYISYHASVV NYLNLANAYAEIGKPDEYLLTIEKAINLDQSDLRPLWFKIQALFHLKRYVEVIPVSNKFL KLQPDNTGVLAFKADALATLARYEEALNTYNIAIETKPKNPTALYLCKGLMLHKLGRLE SVQMYNKVLRDLPKNVSAYNNLGFVLSDMGQNKAAEMEAYEKGLKIDPNNQLIQANKKILE SK

>gene\_1271|GeneMark.hmm|456\_aa|-|1181|2551 >NVVL01000056.1 Rickettsiales bacterium isolate NORP64 Contig\_source1382A\_23747, whole genome shotgun sequence MDTIFAQCSARGKAGVAVFRISGEKSIESLEKLIKAKTSKLRQLYFRKIYHPVTKQLI DEAMVVFFSGNSSFTGEDSVEIHTHGSLAVIKMLNEVLESMPDLRLAEGGEFSRRSFLNG KMDLTAAEGLADLIDAETELQHKQAINQLGGGLEALYEQWRAELLALISLLEAYIDFPDE DIPEETLQVVKSVENLINKIKAHLDDNRRGERLRSGKLAAILGKPNVKGSSLLNYLMRR DVAIISNIAGTTRDVIEGHLDIGGYPIILQDTAGIHDGSSDLIEIEGIERAKKISQNSDI KIIMYDIAETAGLRALEEKDNVDYFSQLVDENTIILLNKT DISEINETTTSPSIHQKTP I KVSVKKNMGMENLMNSIISIAEKIAKPSDSPQITRARHRVQLEQALESLTRFSLNDDLVL ATEDIRISIRALCGITGKITVDEILGEIFSNFCIGK

>gene\_1272|GeneMark.hmm|1603\_aa|+|2645|7456 >NVVL01000056.1 Rickettsiales bacterium isolate NORP64 Contig\_source1382A\_23747, whole genome shotgun sequence MKKNSNVKSLYLSQLNCTIADISSEILDVKGDKGGIYTKFVRNFKYIPIDYRSKDK IDLFGDFTHEAFEFFKNKPAGEHKVKIFPNKYRNDPAITILIAAENRPFIIIDSLNSLSMSK LALQAVFTFHPVIYTVRDDKGLTDILGKREHGTAESLVYIKALGTFDKAAIDKITEEIN VIIGLVNYTYNSWQPLLNKIISITTDVVHSTDIYESEDLPVEETLDFLNWLQKNNITFLG TVDFDVESKALTNEDGVRDIWKDNLEEISTIEFSKSEYEEKLVMLGKINKLSPVHRNA LVDYILVKRVDKDG VYRSGTIIFGLYGTAIYFQSIKSIPILRGKMNYVLDKSEFPVNGFN SKKIKNIIESLPRDILIQIDEEDLYCMCIHMLSSMRSHRLKVFVQQDWSNSFINVIIFLP REKLTPEVYNEISCYLKEKFGSEIADNITVVAQDFSHLFATLAIKDILKLD FSHEEMEK DLIQITTNWSESLDRLCCELGEYD GASRHKDVAQSFPAEYRHKFDAGMTIDDIHHLEKA SRQNELTFNLIQGEDNEYVIKFSPEIKLTLSDTLPAIENLGFIAVDEQSFIAKSSSFK KSWIYEFKLSPIKIGTPFDKLENIEEALCKMSSGELASDVLSKLLVSGFNWSKVLI KSLTRYLHQGTGFIYGGYVQKTLVSHHIFTEMLADLFEARFCPAHSEKNVKLSAKMGK YLDEVSSSTEDKVLKNMMLIIEAITRTNFYQNSVCQDNEKMAKSYLSFKFDSSKVPDLPL PIPYAEIFVYSNDFEGIHLRGGKVARGLRWSDRGEDYRTEVLGLMKSQMTKNTVIVPVG SKGTFYLSFAQGNMSREVYMKKVACYQNFRLGLDITDNLVNGKIMQPKDTIYDAENP YLVVAADKGTASFSDYANAVSAEYNFWLGDAFASGSLGYDHKRMGITAKGAWISAQLHF MEMGVDIQKEQFSVVAIGDMSGDVFGNGMILLSKYTNLVAAFNHQHIFIDPTPDHKT SYKE RQRLFAMVRSSWTDYNLKLISKGGGIFSRSEKTINISAEIKELLGKICSSLTPDELIRSI LKAETDLIWNNGGIGTYIKSSSENNIDIGDKANDNLRVNGNEVRAKVISSEGGNLGLSQLGR

IEYALSGGRINTDFIDNSAGVDCSDHEVNIKITLNEAVASGKITTGQRNKILEQMTDGV  
ELVLADNHSQNLALTIAEHSPLMNIESFSQLIKEMEKAKLLDAENEFLPNKSELSRRSIA  
GEGMTRAELAVLLSYSKMSVDTSLATSSLADDAAYFQKYLFEYFPQVMREKFSKEIEAHPL  
RQEIIRTVITNKMVNQLGGTEISSIKRETGASLCDIARAHSVVVEIFDLNLWEKIAKLG  
TSVDVGIKVEMFSDLGKIMRRGISWVFRNIKAPINVNNTIKEFSKQTADLTEIISKLLVG  
TTKTRFFSRIEHYKHSCVDEEFARSVATLEVLVSAFDIIHIATTENKNKDIANLYFESG  
DVLSIDWLRQSCEAQVNESYWNRLSIQSLKDDFYDKQRRLVIEIASQAKPSASLESWLEE  
HSTYASIFINFVEDIKMQETVDLNMIIILANKKLEIFLRKLGAS

>gene\_1273|GeneMark.hmm|130\_aa|+|7456|7848 >NVVL01000056.1 Rickettsiales  
bacterium isolate NORP64 Contig\_source1382A\_23747, whole genome shotgun sequence  
MTLSLEEARKKAGYSIADVAKKLRKQYILCLEKDDFDSLPGDVYIQGYKQIYYKFLGI  
DLPKKKPISVLPPVAIYETNSINKGYIVFFAACMLGLVVLAYSMLNKSPLDEEEVVDENA  
ISVHNIAMPK

>gene\_1274|GeneMark.hmm|77\_aa|+|7845|8078 >NVVL01000056.1 Rickettsiales  
bacterium isolate NORP64 Contig\_source1382A\_23747, whole genome shotgun sequence  
MSEITKQDLIEIHDISHKIDELVAKSAKNEKQIEDLKSQNKDLKQNNQDTLEQIKEYIQ  
ELEQIRNHVYVDSNNNSE

>gene\_1275|GeneMark.hmm|102\_aa|+|8050|8358 >NVVL01000056.1 Rickettsiales  
bacterium isolate NORP64 Contig\_source1382A\_23747, whole genome shotgun sequence  
MSIVTITLNNKTFKLSCEPDSKEHLVLLAQHLDLEIESMKTVPNSASFELLLVMTALNLM  
DEKQSGNEKTGGEILENANQNFQQLLSLRSELNIVAKKVKK

>gene\_1276|GeneMark.hmm|86\_aa|-|8663|8923 >NVVL01000056.1 Rickettsiales  
bacterium isolate NORP64 Contig\_source1382A\_23747, whole genome shotgun sequence  
MFKHVEEAKYIKNYRVWLAFLNDGKEGEIDLYDKINSRTGVFEPLKDISNFKNFVINDTL  
SWENGADLAPESLYSMLSTHASKAMKY

>gene\_1277|GeneMark.hmm|72\_aa|-|8926|9144 >NVVL01000056.1 Rickettsiales  
bacterium isolate NORP64 Contig\_source1382A\_23747, whole genome shotgun sequence  
MYYDEHNPPHFHAKYGEYEVAVEIKTGIVTGKFPRRALNAVIDWYVIHKEELMEDWELAQ  
KDQKLNKIEPLE

>gene\_1278|GeneMark.hmm|607\_aa|+|9405|11228 >NVVL01000056.1 Rickettsiales  
bacterium isolate NORP64 Contig\_source1382A\_23747, whole genome shotgun sequence  
MTSSIRNIAIIAHVDHGKTTIIDNLLKQSGTFRDNQKVEERAMDSNDLEKERGITILAKC  
TSVWVKDTKINIIDTPGHADFGGEVERILSMVDGVLLVDAAEGPMPQTKFVLGKALKLG  
LKPIVVINKIDRSDAREEEVLDEIFELFMSLDANNEQLDFPVIYASGRSGWAVNDLEKDP  
RENLDALFNMVSHVEKPASVDAPFSIIVTTREYDPYLGRILTGRITGIKINMPIKV  
MDREGNVVETGRITKMLTFKGLERLPVEEAIAGDIIAIGLEKANVSDTIADPEVKKPLE  
AQPIDPPTLSMTFSINNSPLAGREGDKLTSRVLRLMREVEGNVALKITETDKTDAFNV  
AGRGELQLGVLIETMRREGFELSISRPSVLFKEDPETGARTEPMEEVQIDVDSEYVGSIV  
ESMNLKRGQMKDMRETGAGKTRLIFIAPSRGLIGYHGPFLTETRTGTGVMRSRIFHSYGEYC  
GKIEGRRNGVLISMEDGNSVAYALWNLEDRGDMFIGSGVSLYKGMIIIEHNRSNDLEINP  
IKAKQLSNVRASGKDEAIKLSPPRLMSLEQAIAYIQDDELVEVTPKSIRLRKVYLDPNER

KRLSRQA

>gene\_1279|GeneMark.hmm|153\_aa|+|11326|11787 >NVVL01000056.1 Rickettsiales bacterium isolate NORP64 Contig\_source1382A\_23747, whole genome shotgun sequence  
MISFMKIQIISVGKMSAELATLAKHYQKMIGWEVRSVELVHSSKLLKDEQIKQYEAKLIKE  
KLTKNAHIVALDLSGKHLTSHEFSKLFSSQMMRGGDIDFIIGGAFGLDESIISEASARLC  
LSKMTFPHQIAKLILLEQIYRAQTILNGHPYHK

>gene\_1280|GeneMark.hmm|89\_aa|+|11800|12069 >NVVL01000056.1 Rickettsiales bacterium isolate NORP64 Contig\_source1382A\_23747, whole genome shotgun sequence  
LRAANCYHCPILIDWLKMAKEELIEFDGEVDELLPNATFRVTLNENYKIIAHTSGKMRK  
NRIRILAGDKVRVEMTPYDLTKGRVILRY

>gene\_1281|GeneMark.hmm|197\_aa|+|12113|12706 >NVVL01000056.1 Rickettsiales bacterium isolate NORP64 Contig\_source1382A\_23747, whole genome shotgun sequence  
MTTPILASASPARLTLRQVGIPEPDRIPADVDETEERGELPKKLAHRLAILKAQTVAS  
TIDQGIIIGADTVPMGRTPMRKAANADDVRSSLKLSQRHRVYTGICIIKKDSGGVRE  
LSRVVQTTLRFKQISDAEIDYYCSTNEGIGKAGGYTLTGYAESFVAYISGSFSNVIGLPL  
FDTMNMLNSCGVRLFGK

>gene\_1282|GeneMark.hmm|239\_aa|+|12847|13566 >NVVL01000056.1 Rickettsiales bacterium isolate NORP64 Contig\_source1382A\_23747, whole genome shotgun sequence  
MSIHKFSLHHAFASYLEGDDCDRTWIYTVERNHVGILRELLGIVNAQDIDIKLEILQNP  
DLLRLATSSKTRNTDLFSQFLYNACGQSCSEEFLLQSAFEFAIAKKDVARVTYIVEVAVYF  
EVITPALVALNSLYTVGDRVYQHLYKYGAYKLGLEQVYAKTLPTVVKIASLVDIPIDIAR  
MIVLGLFLGYPEGDQNFLLDITEERISALDGNASEEWKALLDITEEDISELGSNASCCVIC

>gene\_1283|GeneMark.hmm|364\_aa|+|13593|14687 >NVVL01000056.1 Rickettsiales bacterium isolate NORP64 Contig\_source1382A\_23747, whole genome shotgun sequence  
MSKRESETRDYSGRRTSQIDIYAAAGLVTSGRSASVPIIREDTESKVDINGFYRSNSILT  
EVGLAASAPGSHRGSVVSFSAGVGEIDGLSRQSSRLSAFEPEGGNENAEELFAARVSGM  
VTRMPSMIKAANRESINNGSQNTLVFSDSLLLIDPNVAWDMVVASGKNNGNFSPWVGELQ  
EASVDSITSVKIGQMLRLMVNNIDSATLGVARLHAKENPLEKLNLLSFTKKALIDSEQNL  
FNTLVYLQRVDLWDFLQSLAEPHAHLTKDGLTTIKVLLTALKQFIDSENDTMNGSNRNI  
EIQGEYINLSNIPNVLILQDEYIQNPSVYEASIVATSVELAIVAASDEEGTGCSCMGEEG  
CVII

>gene\_1284|GeneMark.hmm|196\_aa|-|14777|15367 >NVVL01000056.1 Rickettsiales bacterium isolate NORP64 Contig\_source1382A\_23747, whole genome shotgun sequence  
MFLSKRFSVFALIFTILLGALNPAQAAKSGSSSLRTFGDYAQIVNPLFVAGLASQEIGFG  
HFIIYGQSWVSMHGKLIKLSAKWSASKRPNTGNKKDRYEGMPSGHTNSAWVAASYVRM  
FSEHKYLSIPLYATAIVTGCSRVKAKEHTTLQVIAGAALAELVTYINSRLDWSDEYQSTN  
FYFGGDEV SARFEFRF

>gene\_1285|GeneMark.hmm|403\_aa|+|15578|16789 >NVVL01000056.1 Rickettsiales bacterium isolate NORP64 Contig\_source1382A\_23747, whole genome shotgun sequence  
MRYLSKKDYSILLGNIIDHFDTSIYIFLAPMLVPIFFPHSDPEMGLIMAYGILATSIVTR

PLGTYLFGALARASSPPVALSYSLIGVGVTTLLVGLLPDYDLIGKYAPILLIIFRIFGGI  
FAAGESAIKLYLIQDKADKEAHSCSYLYQLSTVLGIFLASMTAALIHSIDTANAWRLCF  
IFGGIASIIGFYIRKTSLPAPASGLQLFKFYDASGLRELWHHRRVVVRIAIVESFSQITY  
VIPFVSMNYLIPLFTNISLSSMMYVNSFMLIFNIFAIIFIGRIVASFAPKYIMMRAGLML  
ALTIIPLWYFIEGASIAVYVTFVRLWIIILGVAFLCPLNLWYRDQIAGDEKYIIVGMGTTL  
ASGIIGKLTSPICLVLYYSTGSHMSVIFYAACIFVAALFVINE

>gene\_1286|GeneMark.hmm|522\_aa|+|16807|18375 >NVVL01000056.1 Rickettsiales  
bacterium isolate NORP64 Contig\_source1382A\_23747, whole genome shotgun sequence  
MAQNTTKRKDKDHVSTKVIIAYFAMVVGMFMAILDVQIVASSLSVIAAGLSASRDELSWI  
QTSYLIAEVIVIPITGFITKAFSTRIIYLGATIGFTIMSVLCSLAWNIESMIFFRVMQGM  
FGGAMIPITFGLAFVIFPKNIQVTVSMIIGLVVTIAPTIGPTLGGYITEISSWHFIFLIN  
IIPGILVSI AVFLYVDFDKPNYLLKNFDLGLVLIATLGGQYVLEEGNKKGW MEDNH  
LLFLSIVVAISFVWTLIQELTHKNPIVDFAFQDRNFSLSCVFSFILGLGIYVVIYLLPL  
FLFTVAGYSSLQIGIAMMVAGAFQFLSAPIAARMLSVGTDERIVLAIGFVMFAMGCYTNT  
FLTAESRYWELFIPQALRGFSVMFCFISINGLAFDTMPKSRVQNASGLYNLTRNLGGAIG  
LASINNLVISRTKIYAQA IKDNMPMTSPQLQETVGAISESMAGRINDPELAGLIFLDSLV  
TREAIIAINDAFIIGLLFCSGLLLL PFLVLTKKGANSNVH

>gene\_1287|GeneMark.hmm|150\_aa|+|18365|18817 >NVVL01000056.1 Rickettsiales  
bacterium isolate NORP64 Contig\_source1382A\_23747, whole genome shotgun sequence  
MFIKLLSLPIFILWIGLAGADVPIFMIAAPLFVMLIALKMKVLPKKIAFRIGAIPIYFMW  
LLKEVIMSSIAVSKIAWRKNLKIQPMVEPVKSVQRTDVGIVTYANSVTLTPGTVTLSDS  
HALLVHAIDIRFMDDLQEGEMDRRIKKIIC

>gene\_1288|GeneMark.hmm|90\_aa|+|18811|19083 >NVVL01000056.1 Rickettsiales  
bacterium isolate NORP64 Contig\_source1382A\_23747, whole genome shotgun sequence  
MLNICLVIIITFSSIVICGALWQKDVFTKLLFLNSGTSLAALFICFLGSFEVNSSYIDIA  
LIYFLLSIVATSAYMKYFLQKHKGKNAPS

>gene\_1289|GeneMark.hmm|396\_aa|+|19085|20275 >NVVL01000056.1 Rickettsiales  
bacterium isolate NORP64 Contig\_source1382A\_23747, whole genome shotgun sequence  
MKNSSKITAETPNPKITILGLGLGGMITALSLAKHNISTHIIEGRAAGGDGFFHDVRTT  
ALTDSSKQFFQQIGVWEKLAELSCPINDIYVADNRAPNLLHFASSELKKGEKMGYLIENT  
PFKKALFEEVSASSLINIMDDTSYEITENTPDGCSLLLNGKITHKCDLLLVC DGRGSAAR  
RRYFSADLEKSYNQNAITFIAQHEKPHEGSAVEHFLPSGPFALPLKDQHRSSIVWSVPS  
DKNDMLMNLPKDELTHLVQRNFGFLGEVQIKSEIASFPLKAYVTKQYYNKRIALVADTA  
HIVHPLAGQGLNQGIKDVQALAEELLEHGIAERVLEKYQTMRKADNSNILEITDVINSVF  
SNDSKLFHSARQLGFAMIESLPPLKNLLIKYAMGRR

>gene\_1290|GeneMark.hmm|236\_aa|+|20282|20992 >NVVL01000056.1 Rickettsiales  
bacterium isolate NORP64 Contig\_source1382A\_23747, whole genome shotgun sequence  
MIKTLTSLANYIMPYRCASCSELIEDSGGMCAECFAKLN FITSPYCQLCGVPFEFAMEG  
QALCGKCIITPPKYDLGRSLLKFDQHSKNLIHAFKYNDKTS HAKMFALIIARYANDLQD  
VEFIIPVPMHRIKRLVRNYPNAQVLSTELAKLLK RMLPDGLIKTKWTKAQTTLRSERM  
KNLTGSIRINEKYDIKDRVILLIDDVRTTGTTSN TCSNLLKAGAACVKLV TIGVA



>gene\_1291|GeneMark.hmm|83\_aa|-|21004|21255 >NVVL01000056.1 Rickettsiales  
bacterium isolate NORP64 Contig\_source1382A\_23747, whole genome shotgun sequence  
LFYVNYFYGDFIMAKSGIDEWVMVKKGQRELTMDQYAILDACRTFNYLIGDNLDDLKLS  
GLELDYIEPSEPPLVGNSSDSEA

>gene\_1292|GeneMark.hmm|84\_aa|-|21283|21537 >NVVL01000056.1 Rickettsiales  
bacterium isolate NORP64 Contig\_source1382A\_23747, whole genome shotgun sequence  
MVSARKRLALHKPSGIIAQKLGTLKAIIRIINNTWIIRIDSYGLHTTEGLKKNKNSFC  
VKKHHILLISGLFITVSNYFYDDC

>gene\_1293|GeneMark.hmm|220\_aa|-|21639|22301 >NVVL01000056.1 Rickettsiales  
bacterium isolate NORP64 Contig\_source1382A\_23747, whole genome shotgun sequence  
LDGVSADLIQESLHETTNETQPETGEMPRASSILPDLPEMHMILPVFMDNLDGEHLKAI  
YRTLASFDNLPPESAKIFRVILVLTIQGSIRLKETCIYLAGLNNPNADSLENLYNILLE  
CNNLSDELFEIYDTLVGFSNLSDKFFEEIYDTLAEKLNSSAEESLAETCYTFAETCYTF  
EDSLSEAPSLDSAEAEFVLFDPDDENTSPAGALGPNDV

>gene\_1294|GeneMark.hmm|77\_aa|+|22938|23171 >NVVL01000056.1 Rickettsiales  
bacterium isolate NORP64 Contig\_source1382A\_23747, whole genome shotgun sequence  
MTNNRVKYASTIRKNIGLSINKIRLEKRITLKKLSERTNVSINLLDKFELGKNKINIELI  
AIIANALNVSAKDFLLK

>gene\_1295|GeneMark.hmm|131\_aa|-|23334|23729 >NVVL01000056.1 Rickettsiales  
bacterium isolate NORP64 Contig\_source1382A\_23747, whole genome shotgun sequence  
MIVIDSNIILDIVTQDSRWFWDWSSQLKTLAEDYKLLINDVIYSEISISFEYIEELENIL  
VDNFIIQPIPKALFLAGKAFKLYKGLGGTKTSTLPDFFIGAHASILNVPLLTRDKKRYK  
NYFPNLEIIP

>gene\_1296|GeneMark.hmm|74\_aa|-|23726|23950 >NVVL01000056.1 Rickettsiales  
bacterium isolate NORP64 Contig\_source1382A\_23747, whole genome shotgun sequence  
MKVSTKGQVTIPFDIRNKLGLLPHTEILMKTGTQVIEKKAGTVSRGQYVLRNRMVKGAS  
VKMSTDEIMKITRS

>gene\_1297|GeneMark.hmm|298\_aa|-|24060|24956 >NVVL01000056.1 Rickettsiales  
bacterium isolate NORP64 Contig\_source1382A\_23747, whole genome shotgun sequence  
MRSRILIVTCLSLIFAGGVALYLYPSKSTEIITLTADTSPTKKKPTDPGGMVLPNSDSL  
VYEKLTQVTNRKIRILPEPEAPIEIRRTLKTEAKFLDSIEEILDNIEYEAKLANNKPD  
ALGGSQDSRYGDSSYEDSSYRDSSYGDSDRYLDSNYVMPNIIAKSEIPDDMMQDNPPQND  
SSRGPHSILIAGTKLNITRAAEPEHKMAQFNLSKSDSGYKIQLSSAYSLSAETQWKAL  
QKRHAKILKGAALITKRVEGKNERIFYLVMAGTYSSLSHAKSLCRKLGARKQNCIITR

>gene\_1298|GeneMark.hmm|577\_aa|-|25032|26765 >NVVL01000056.1 Rickettsiales  
bacterium isolate NORP64 Contig\_source1382A\_23747, whole genome shotgun sequence  
MNIFKELKNDLKNIGLKLKCADQDIWSQASLETPKDPLNGDISTNVAMIIASKEGGNPREI  
AFKFKELHSEIPYVAHIEIAGPGFINFTVKAEKWHASLRSILSDDVDFWEMNVGNGKKNV  
VEYVSANPTGPMHIGHARGAVFGDALANILTKCGYMTKEYYINDAGSQIDTLVDSVILR  
YKEALTGQETQIPEGLYPGDYKPLGKKLADEHGDALLSMDAGEMRGKIKRIAIDEMLIL

IKKDLADLGVNHDIFFSEQSLHDGGKIDEAIDVLRKKDLIYTGTLPKPKGKIMEDWEEKE  
QMLFKSTNYGDDQDRPVQKGDGWSYLAADFAYAKDKIDRGFDNLIYVLGADHNGYVKRI  
KAVIEALGDGKVTSDIRTTQLVNFVKNGEPIKMSKRSGNFMTVSDVTRQVSKDIIRFIML  
TRRNDMILDFDFDKTKEQSKDNPFVYVQYAHVRAKSILAKAQETIGSAYKNFIAEEFDVS  
LLSSEEEIQLIKLLASWPKTLSAAAQHREPQRIAYYLIDVASKFHSIWNLGKENNNYRFN  
IEDNIELTTARLALAEAVRKIIAGGFKVIGVTPMDKM

>gene\_1299|GeneMark.hmm|386\_aa|-|26762|27922 >NVVL0100056.1 Rickettsiales  
bacterium isolate NORP64 Contig\_source1382A\_23747, whole genome shotgun sequence  
MLKQYACLPENSRGRIHPEDPTPYRNEFERDRDRIIHANAFKRLQYKTQVFVNHEGDHYR  
NRMTHSMEVSSIARSLSKTLGLSEDLAESVALAHDLGHSFPGHAGEHALNECMKDFGGFS  
HNAHSFKILTNEHKYAAF DGLNLTWEVLEGIVKHNGPVINEKSYEYVYVYNDKHGLDLE  
KYSSAEAQVASLADDIAYICHDLSEIRAKIVSYRDLEEFIDKYIHEVRAVYPNIADN  
RLIYEIGRKLTHHLIDSLLLQTNRNLSFKIETESDIRNHKRQIVEFTPSIFEEVKQIKD  
FLMRKVYKHHEVAYVTLQSQNVVRKLFKLYVDNIELMPFSWRNMIAENNLDSKMSIADY  
IAGMTDRYAIKQYQSFFNLSFANKGL

>gene\_1300|GeneMark.hmm|110\_aa|+|27997|28329 >NVVL0100056.1 Rickettsiales  
bacterium isolate NORP64 Contig\_source1382A\_23747, whole genome shotgun sequence  
MNLLISADASKRVAELIAKNDKKMVALRVSDGGGCSGFQYQYQLAESINEDDFVLISDD  
KNVKVIIDAVSQEFLDGCSEFIQELGSSHFQITNPNASAKCGCGNSFAV

>gene\_1301|GeneMark.hmm|752\_aa|+|28769|31024 >NVVL0100056.1 Rickettsiales  
bacterium isolate NORP64 Contig\_source1382A\_23747, whole genome shotgun sequence  
MLFGVEIGLDMVIVIGFLVLTLVVGMGHGKSVKTIKDYALGGRNFSTAALTATIVATWAS  
GSGFFVTMSKTYSDGLPYMFARFGIGIYFLIVSFLVPRMGEFLGKISIAEAMGDLYGRH  
VRVITAIAGTIGAVGSVAVQLKVFGSIFSFLDLSHYVTIIVAGVIVTVYSAFGGIRAVT  
FTDMLQFFAFGIIIPVIGFIIWDFYQGSADLTYAMSDPRFNITEIFSANNINSLEMTVL  
FCYFAMPTISAAAFQRISIGNNIAQVKKAFIAGTFLIVIQVITAWIPFLIHALDPSLAS  
DQLLGYIIDTYTYPGLKGFIMVAILAFAMSTADSRINSASVLTNDIYKLALPNLTNEIF  
VSRLFILGGSIMLALFETDILGILVLANSFYYPVVTTPFLLTVFGFRSSKKSVLIGM  
AAGFSTVVIWKLPLVFTSMSQKIVGVLFAMFVNAVFLMASHYLLRQKGGWVGVKDDTTYI  
DEQRIRKKKWAAMKFKQSFKLIKTIKEAPVPESTCVMMGIYFILFTVTIAYSTDIDT  
LKDNGNLVSIYQIMMVTGTVMAMYPIWPMNIKQKTRDMIIRIWYPVTMFMVMMVFFSAFF  
VLLSDSNLHYMIFTANIITLILIGWQVGAVMIIVGYTMAVQFYKYMGIEYLDISLGS  
PQFILVYSLVFGVILMIFLKPQERLEQTEHRVGELSDEVGTLVTVVSSRDSQISTLDT  
KVSGLLEERVDHYTERTTNQAQEIERLGATAQR

>gene\_1302|GeneMark.hmm|272\_aa|+|330|1148 >NVVL0100057.1 Rickettsiales  
bacterium isolate NORP64 Contig\_source1382A\_23831, whole genome shotgun sequence  
MKKIVIHVSESSGQTVKHAANSSLSKFRDIEVKKYHWPMVRNLKMLEEVFEKVRKPGM  
ILYITISNEELRGALKKFCYDLKLPVSVISKIVKEISEYIGTSADPAIGYANKFDDSYFD  
KVEAIEYSLRHDDGQILEDLEEADIILIGASRTSKTPTSVYLAINGFKTANIPFVRECPF  
PDFLHEMTNPMIFGLVINPNRLIGIRESRMNLLQVTEKSAYTDIDSVREECRQVKKLCSE  
NNWKIIDVSMRSIEESAAIIMKHYYDKKKMSR

>gene\_1303|GeneMark.hmm|204\_aa|+|1123|1737 >NVVL01000057.1 Rickettsiales bacterium isolate NORP64 Contig\_source1382A\_23831, whole genome shotgun sequence  
MIKRKCRDNIGMMKNIAITGGFASGKSFLKVAKSLGYDIFSCDDYVGMPLYKDEKIQKII  
ESEIDGLAKFNKQDLAKIYDDDNARKKLENIVHPMVRAGIREFEQKNADKEMIFTEVPL  
LFESGFDKYFAHNICVYCSDATRYLRAKSRGYDDDKIIRINKIQLTSDEKRKMADFTID  
SEQSFGRMKSLIGITSQIKNHRH

>gene\_1304|GeneMark.hmm|221\_aa|+|1760|2425 >NVVL01000057.1 Rickettsiales bacterium isolate NORP64 Contig\_source1382A\_23831, whole genome shotgun sequence  
MTEREILDTEETGLSPKDGHRIVEIGALEMVNKVLTGKKFHQYINPERDMPEGAYKVHG  
ISYEFLQDKPLFSDIYKEFMDFIEGGKLVHNAQFDIRFLNHELKSLVKAAPLNLEDAIDT  
LAMARRRFPGTRVNLDALCKRFKVDNSSREFHGALKDAALLSEVYVELTGGRQVTFMSMDK  
KDVKLARDSGDKFGARAIGNKIVIQPTEEEEKNLHNKFLKLEK

>gene\_1305|GeneMark.hmm|209\_aa|+|2441|3070 >NVVL01000057.1 Rickettsiales bacterium isolate NORP64 Contig\_source1382A\_23831, whole genome shotgun sequence  
MQNKNNISAKSSKSNIELKKSRLKRDILSRKLNEDDYFLANNIIIENVENLLACLKNET  
PSKKRVAGLYWPMKGEPLVLIINSNWRIALPKVRGVKMDFMKYKIGEQLELSMGRGVR  
QPQNNITLSPVVIIPGLAFSIKGDRLGFGAGHYDRYFDKLGKEKDITKEKDVIKIGVCF  
DENLYEHLNPHDVKLNIIITEKTIAL

>gene\_1306|GeneMark.hmm|240\_aa|+|3067|3789 >NVVL01000057.1 Rickettsiales bacterium isolate NORP64 Contig\_source1382A\_23831, whole genome shotgun sequence  
MTVTLFDSLIIIVITVISSLFGVYKGMIIHIIINFLGFIASIVFAMVIYPYALIMLSGYIES  
ELVASITSGVASVYFSLVIFTFITAKTILLFSDSGGGIIRILGLVAGFARGVFFSLIVF  
GIAAIATTGTYSNVKHTEDMVLKLSKYPDWLADATTPHLEKMLKDITSMILDRNRDR  
GNIEDIEDMDDMMDLAEKEEDLIDVIKRRKKKSFSSAISKSTTSSIAVPIEVGSENDFD

>gene\_1307|GeneMark.hmm|246\_aa|+|3806|4546 >NVVL01000057.1 Rickettsiales bacterium isolate NORP64 Contig\_source1382A\_23831, whole genome shotgun sequence  
MQKYTFKEHLVELKNRLLKVVCAFIHAFVGSYWLKDDIYEIFLKPLSDLSSQGGRKIYT  
GLAEAFFSYIKLALFSAFIILPVICYQIYGFISSGLKESEKKIVSSVLAFFSPILFYFGA  
FFVYFVMPRAWDFFLSYESSMKIPLIMEARISEYLGVMQLTLVFGMAFQLPIIMVIL  
CVIGLVDSGLRSKRRISIVIIIFIVAAIFTPDPVISQIALAIPLMMLYETSIIIMCKLVEN  
RTEGSK

>gene\_1308|GeneMark.hmm|427\_aa|+|4548|5831 >NVVL01000057.1 Rickettsiales bacterium isolate NORP64 Contig\_source1382A\_23831, whole genome shotgun sequence  
MLDIKWIRENETEFQELMQTRGLKIDSEKLIYLDEEKRLTTLMLQQFQQAQKNQKSKRLGA  
LKGRVSVFEFDQLKKDVSHINEKLIIEISSQLNEFDEFQSIMDNIPNLPANDVPYGI DESMN  
RFVRDFKEPLEFPYAKEHFDLGRDLGMMDFEQTAKISGSRFVTLTGKLAKLERALISFMI  
DTHNEDFAFEEVSPPSLRSEAMYNVGLPKFADDSYLTEGGDFRLIPTGEVPLTNMVAG  
KILKRDELPLRYVAYTECFRSEAGSAGRDRTRGMIRNHQFGKVELVTITTPDESKNEHEHM  
LNASEEILKRLGLPYRVMLLCTGDMGFSARKTYDLEVWLPQKQKYREIASISNCESFQAR  
RMKARYKETGENNTNFVHTLNGSALAVGRTIVAILENYQNEGDSITPEVLRGYMGGCDK  
IEKPNAS

>gene\_1309|GeneMark.hmm|84\_aa|+|5821|6075 >NVVL01000057.1 Rickettsiales  
bacterium isolate NORP64 Contig\_source1382A\_23831, whole genome shotgun sequence  
MQVNMHLISDIVGMFQVALVILSYFLLQSEKVTSNSPFYLYSNLIGAIFFLLFSLWYHWNL  
ASVIIEVLLWLLISYIVRNYRGT

>gene\_1310|GeneMark.hmm|351\_aa|+|6244|7299 >NVVL01000057.1 Rickettsiales  
bacterium isolate NORP64 Contig\_source1382A\_23831, whole genome shotgun sequence  
VEEIMSDRIFYNNPTSHKLSEIAQAIGAELPSLPGGILAGDIDISTVKSLSEAGKGDITF  
LSNKKYIAEFKATKASACIVPLGFGEDSNSDSEIMLKVKNPYSAYTHIIDMFYSSGKKL  
GSRIMPTAYVSDSAKIGKNCYIGHNVVIEDEAEIGDNCIIESGSVIDYKVKIGNNARIDS  
NVSISYSIIGDNFVALSGARLGTDFGFGSTNNGIHKIYHIGRVVIGDDVEIGANSCIDR  
GSMNDTIIEDLCRIDNLVQIGHNAHIKKGAILVSQVGVAGSSTIGSYCALGGQVGIAGHI  
TIADGVQISAQGGVIQDIKEAGIMGGTPAVPIRDWHKQTIMMKLIKGGKIK

>gene\_1311|GeneMark.hmm|149\_aa|+|7296|7745 >NVVL01000057.1 Rickettsiales  
bacterium isolate NORP64 Contig\_source1382A\_23831, whole genome shotgun sequence  
MTQGVINIEEIMSIIPHRYPFLVDRVLEIELNESIIGIKNVTANEPQFTGHFPGRPVMP  
GVLIVEAMAQLSAILVAKSMESVKDKVEYFMSIDECKFRKVVQPGDSLIMHANIVQNRGA  
VWKFKAQAEIGGQIAAESCFTAMVKDKTK

>gene\_1312|GeneMark.hmm|260\_aa|+|7755|8537 >NVVL01000057.1 Rickettsiales  
bacterium isolate NORP64 Contig\_source1382A\_23831, whole genome shotgun sequence  
MIHKTAIIGENVKIGKNVKIGAYSVIGDGAVALGDNVELKSHVITEGRVTIGEGTVIYPPFA  
SLSYPQTLKYEGEDSEVIIGKNNTIREYVTIQHGTTGGMATKVGDNCLFMVGVHIAHNC  
IVGNNVIFANYASLAGHVEIGDHVIIGGLSAVQQFCRIGAHAMIGGVS AVTRDLVPYGLA  
SSERAHFQGLNLIGMNRGFDKKQSLEASKIVKDIFNGSSGGVFNKRVEIAKESYPENKV  
LQEIIEFIQKDETRTYCKFK

>gene\_1313|GeneMark.hmm|283\_aa|+|8551|9402 >NVVL01000057.1 Rickettsiales  
bacterium isolate NORP64 Contig\_source1382A\_23831, whole genome shotgun sequence  
MIPNLGIVAGEGELPLELAKLYKLSGGQCFIASISGAKTLDFGPFCKPFALGAVGGMIQYF  
KENKVENILLIGGINRPDFFTLRVDLTGGALIAKILKQKILGDDNLLRIVSDYIESKGFK  
IISPAEILSLGAGTNAEIGTGAGAGFETRAGQITSKKVPSEQDMADIEIGKNIKSLGAL  
DVGQSVIVADGYVLGVEAAEGTDNLIQRCAELREKPTGGVLVKMSKSAQDMRLDVPAGV  
ETIRLLAECGFNGVAIEQNGVIVISPESTKQMLDKAGVFFSYI

>gene\_1314|GeneMark.hmm|733\_aa|-|9461|11662 >NVVL01000057.1 Rickettsiales  
bacterium isolate NORP64 Contig\_source1382A\_23831, whole genome shotgun sequence  
MSSSKSEQLTAIEALQKYRLLYKSFTEEIVEFYTAQGAMDWNVLRVILTGMALDKELGD  
NDSLFLMLYKIGVCYHELKQTPELHHKALSQYQDAQQILNNYSINLSTEFRDGFFAFCN  
KVQQAQPSGEVQQTPPSSKIHSQAQSSLAPTQQKYEAFAQETVEFIEKYPTVQGSVLLYV  
LKGREFFSIATNDMAGLHHTLLSTAAYLNLANRASTKEHTDDSIKIAKNCVAEAIKAFP  
RESMTPAQQESFRSCMNKLVALKESAMNNSAVPNLPPQAPSEALGAMPISPEFENKLPIL  
TPSLSSSSSSSQIAPPNVGIANS LAHSQFQLSPQLLAHLTICAEKNRNGYDQYVEATTPV  
FNQLKQDVQNLSCNLLLHLFIDAERLAKIWDNSESLEFFITNIAICYIMLSQVSANYKA  
KATEYIAKARGMPYINNIPQNEINDFNAFTGEFEARISVNEPCNIAALQQQARISFPAAQ  
INQSAYKQYQGITNLAIELTKKHPNDPSHHSVLFELHQRNLDCAHSNWNNMFSSLSNI

VVCCA KLSQVDASYRQEAMKYIDEAKNLLS QLSQDPTLAKTVYSFNK FVQRFEETR TDQD  
MAPHISDDV PPLPPTGMQSSSSSSSAPKRSLPPTDTPPAKRTKVTHDETNDSP TSLV  
SPLPATMITIPKAPPTPPSDAFETDPFCPSNLETSSSPWGT PMSDIAGIDSDTNMFSMFG  
EDGEDAGMSWMLT

>gene\_1315|GeneMark.hmm|304\_aa|-|12080|12994 >NVVL01000057.1 Rickettsiales  
bacterium isolate NORP64 Contig\_source1382A\_23831, whole genome shotgun sequence  
MAITASLVKELREKTGAGMMDCKKALVETNGESEAAIDWLRTKGLAAA AAKKAGRTASEGL  
TGVCVDGTKGAAIEINSETDFVSKNEVFQNI VKEVSAIAIGHDSLEGLKAASTKSGKSVE  
DEIIANVATIGENLNLRRMESVSVTDGVIAS YIHNATTENMGRIAVLVALESTGDKAKLM  
ELAKQIAMHVAAARPQCLNAESVDSALVQREKDIFTKQSKASGKPDNII EKMIIEGRIRKF  
LEEIVLLNQTFVIDGKTKISELVASFAKELGTPVELKSYVRFELGEGVEKEETSFADEVA  
AAAK

>gene\_1316|GeneMark.hmm|302\_aa|-|13051|13959 >NVVL01000057.1 Rickettsiales  
bacterium isolate NORP64 Contig\_source1382A\_23831, whole genome shotgun sequence  
MSNLPKVS VGSLLDAGIHFGHKTSRWNP KM APIYIGTRDGIHIIDLQQT VPLLQNALQKI  
YETVKNNGKVL FVGSKVQATELIAEYAEKCGQFYVNNRWLGGTLTNWNTISKS IKKIDDI  
EKIIEDEKKASSYTKKEILD LTRKREKLLKSLAGIRKIGGIPDLVVVIDTNKEHLAVNEA  
TKLGVPIVAVVDSNSNP DNISYPIPGNDDAIRSIRLYCELFSEAALAGIKDALASSGVDV  
GLSKKAEGDKSLDGVKLEKTAKVSKAKPAPKTEAKSAAKPEPKAKAAPEKEAAKESASP  
AK

>gene\_1317|GeneMark.hmm|334\_aa|-|14269|15273 >NVVL01000057.1 Rickettsiales  
bacterium isolate NORP64 Contig\_source1382A\_23831, whole genome shotgun sequence  
LLKKVFKIKLLLIIVAAVFLSIVNILGSFLFLPGNLQKEKTI IIPNLSISQISALLED  
AEIINKR LFEITCQIYSYHKKLKVGEYRFTQ NITPYQIINKLTAGKSIVHRLF IPEGTL  
VHEIIEQINANELLFGKKISHTIPEGY LMPSTYFYSYGDQREHIVNKMRT EMSEALDAVM  
LKLSKNSPIKTRKDV LILASIVEKEAGNDRERPKVA AVFINRLNKKMKLQADPTTIYAIT  
NGKYK LERSLTRKDLRIKSPYNTYHTYGLPVAPISCPGRASLEAVVAPAKTTALYFV VNG  
RGGHSFNSLKEHNKHVRKFKARVKRQKARRKRG

>gene\_1318|GeneMark.hmm|79\_aa|-|15276|15515 >NVVL01000057.1 Rickettsiales  
bacterium isolate NORP64 Contig\_source1382A\_23831, whole genome shotgun sequence  
MANLKSIEKMSFEESLAELEGIVRKIDAGQENLADAVG SFERGVTLKNHCESMLKEAKLK  
IEKITSTDNGEIKTTEVEL

>gene\_1319|GeneMark.hmm|157\_aa|-|15532|16005 >NVVL01000057.1 Rickettsiales  
bacterium isolate NORP64 Contig\_source1382A\_23831, whole genome shotgun sequence  
MTHYFDES FVVAICFVAFIYLAYQPVRKAILASLDARIQEIKDKLEETETIRND AKKLLD  
DLEHKMSDFEARKQVILDSAEVTTKRLVETKTQEMELLARKKESAVKFIENQKTKATAA  
MRDEFTESVLNMV RTYLVETKNNSVSDEEIIHF IKK

>gene\_1320|GeneMark.hmm|159\_aa|-|16002|16481 >NVVL01000057.1 Rickettsiales  
bacterium isolate NORP64 Contig\_source1382A\_23831, whole genome shotgun sequence  
MPQFDVSSFTS QLFWLALSFGCLYFLVSRFIAPKAESILTARN SCLEGNIH DANEYNNKT  
KLEITR KERSKEVHASVEEKHQQVLRAL EANFNEQMEELAGVLQKKTEKAL SEVNSYID

KFHADEPNNSCAHLAAFIQKVTNKQADLKLLEKIHGRSK

>gene\_1321|GeneMark.hmm|75\_aa|-|16510|16737 >NVVL01000057.1 Rickettsiales  
bacterium isolate NORP64 Contig\_source1382A\_23831, whole genome shotgun sequence  
MEELMALKFIGAGLMAFGMLGAAIGVGNIFGSLLGAIARNPSASDQLQRMAFIGAGLAEA  
MGLFSFVIAMLLIFT

>gene\_1322|GeneMark.hmm|242\_aa|-|16869|17597 >NVVL01000057.1 Rickettsiales  
bacterium isolate NORP64 Contig\_source1382A\_23831, whole genome shotgun sequence  
MSHSPLDQFKIKELINIELFGHDVSITNSAAFAMILASLSVFVFMIALKDKKLVPSRLQL  
SAEGTYGLIRDMLEQNVGSGGRKFVPLIFLTFMFILACNLLGMIPYGFTATSHISVTFAI  
AMMIFLLVTVLGLFLHGFRFFSLFLPAGTPWWLAPLMVVIELFAYLARPVLSLRLANM  
VAGHVLLKVMAGFVISMAYLKFLPIPFIVILVGFEIFVAILQAYIFAILSCVYLSDAIN  
LH

>gene\_1323|GeneMark.hmm|103\_aa|-|17587|17898 >NVVL01000057.1 Rickettsiales  
bacterium isolate NORP64 Contig\_source1382A\_23831, whole genome shotgun sequence  
MRLWKLKNKMHNKKHQEIQRIDKFKTVKKQASTQANTPLSSASRALNIGVELVAGTIVG  
VVMGLFFDNLFDSKPLFLIICLIFAIIAAFKSIWNRYIKNNVT

>gene\_1324|GeneMark.hmm|263\_aa|-|17873|18664 >NVVL01000057.1 Rickettsiales  
bacterium isolate NORP64 Contig\_source1382A\_23831, whole genome shotgun sequence  
MLQYDIANLNMQDSMNIKKIFLTIAILGLSGCSEDAAISTNADQTMKDSATTSQAEGAS  
PNEQQEQGGDPKTETFEHVSPRSKYEVTDNDTMFGNKDAQVTIIEYFSPTCPHCVYIHK  
KVFPEVKKNYIDTGKVLVYVMREFIATKQDLATILAKCLGDKEYAKFMDVILEQQINWA  
YSKNYREILTNIGSLGGVSPEKYAACLNDESKIELLIQNTSLIYQDPEFGGTPIFFINRK  
AVIGLYPVKKFLKEIDEALEAKK

>gene\_1325|GeneMark.hmm|71\_aa|-|18769|18984 >NVVL01000057.1 Rickettsiales  
bacterium isolate NORP64 Contig\_source1382A\_23831, whole genome shotgun sequence  
VYTKYNINQVGGAYMANNSQEWGALFEEWLLPVYGSPIVSCGSGTVLPADPNAASEPATE  
IFPGLIYTEPR

>gene\_1326|GeneMark.hmm|175\_aa|+|19278|19805 >NVVL01000057.1 Rickettsiales  
bacterium isolate NORP64 Contig\_source1382A\_23831, whole genome shotgun sequence  
MSGIVTYEGVFKFEGENVYLTVSFSMCIIGKKVEIMNLNVAYSKTQWGDERSLISTDSEL  
NAWLEVNNPLLSEYPNYTTKELAIFLVAMNCAAFYAQNCSGSSDRIEYKISPAKAE  
SVADSLKAAGFAREDSKGFDDSSIVLFTRAHDELPLGMELVDMQVAAEIIIEQWE

>gene\_1327|GeneMark.hmm|41\_aa|+|19989|20114 >NVVL01000057.1 Rickettsiales  
bacterium isolate NORP64 Contig\_source1382A\_23831, whole genome shotgun sequence  
MKVVKSLKSLKARDKNCRIVKRKGRVLVINKVNRKFKAKQA

>gene\_1328|GeneMark.hmm|956\_aa|+|20631|23501 >NVVL01000057.1 Rickettsiales  
bacterium isolate NORP64 Contig\_source1382A\_23831, whole genome shotgun sequence  
MFGINLDLISIVVGLVVTLIVGMGHGRHIKTIEDYALGGRNFSTAALVATIVATWASG  
SGFFITMSNTYSDGLYFIIAVMGMGISFLIEAAFIVPRMGEFLGKVSIAEAMGDLYGKEV

RIITAVAGTIGAAGMISVQFKVFGNMFSYFLHMPNYVAIISAGFIATLYSAFGGIRAVTF  
TDILQFVAFGMIIPMIGFIIWSQFYEEGLSFTEAVSDPKFDLSVLFDPSPKLGIMVIMF  
CYFCIPMSAPAFQRVAIGRNVAQVKKAF LISGICLIVIMIIAWIPFLVYSMNPNETT  
HLLGYIVDTYSYAGLKGLIIVAVIALAMSTADSRINAASVLFNTDICKVIVGDLKRELLI  
SRSFVFLGIGSIIALSETNLIGIVVFANSFYYPVVTPLFLLTVFGFRSSSKAVLIGMG  
AGFVTTVLWKVLPFESYFSQKMAGVLFAMLMNAVFLMGSHYLLSQKGGWVGIKDRTYID  
MQKALRAERIATFINKVRNFPVESIRKIPLAGESTYVTIGVYFLIFTFTTIYSTHMEML  
KENGKMITTIYQIMMISGTMMGMYPWPLSIKQATKEMAIRIWCPIAIFYMLIFLSTFFV  
LVNKVNNLHFVMFAVNMIIVSVLLGWQVASAMIVVGAYMAVQFYKYYAGVEYLDTSIGSP  
QFILLYSLVFIGTTLIIFFKPKQERLEQSEQKVDLTLSYAIGDLT SKVTGLNEEVSHYSMR  
VSNHEKEIERLGGTAQRIINNLNHELRLPVGNNVNF AEMLHDGLGKFSQDQLKEISKEYV  
QNSSRLSSMILNMLDLATLSAKKIELNKKEIDFSRMVTERVHACRNIYAGDKPLEFKLEI  
QPGIIAVVDENYLRQTIDNLLINAINFSEKGVITILSRKKNLVSLVIQDQGLGIPKSEI  
YDIFTPFKMGSNMETKAEGRGIGLALCKAAINAHGGEINAESQEVGTLFKVTLPLD

>gene\_1329|GeneMark.hmm|117\_aa|-|23586|23939 >NVVL01000057.1 Rickettsiales  
bacterium isolate NORP64 Contig\_source1382A\_23831, whole genome shotgun sequence  
MSKHDLIEYKNYYGSVHFDAKEELFYGKIEYIRDLVNFEASDAKSLVQSFKDSVDDYLEE  
CRALNKTPDASFKGSFNIRITPELHREIGLYALQHDSSINGVVKSALKEFMQQQGH

>gene\_1330|GeneMark.hmm|85\_aa|-|23936|24193 >NVVL01000057.1 Rickettsiales  
bacterium isolate NORP64 Contig\_source1382A\_23831, whole genome shotgun sequence  
MSRLEKLIVKLRKESKDFSWNELIKLLTGLDFTLSNGKTGGSRKRYHEGHNIINLHK  
PHPSPYLKEYALKQIRNKLSEEQMI

>gene\_1331|GeneMark.hmm|101\_aa|-|24343|24648 >NVVL01000057.1 Rickettsiales  
bacterium isolate NORP64 Contig\_source1382A\_23831, whole genome shotgun sequence  
MGAQNIENILDSGAFIFYLMNSNAQSEFGLIMAGVAQLVRAPDCDSGGRRFETGHSPHLQ  
ETMRMVLEVWGLGFIIYASPLIIFYKHQLIIFTRTCSSAG

>gene\_1332|GeneMark.hmm|88\_aa|+|24853|25119 >NVVL01000057.1 Rickettsiales  
bacterium isolate NORP64 Contig\_source1382A\_23831, whole genome shotgun sequence  
MAANKILTVKLEAETKSKLQHLGKVKSRSTHWLMKKAIDDYVEKEEKKEALRQETLARWE  
EAESGRVVGHDLVIQSLDSWGAGDKSDV

>gene\_1333|GeneMark.hmm|96\_aa|+|25112|25402 >NVVL01000057.1 Rickettsiales  
bacterium isolate NORP64 Contig\_source1382A\_23831, whole genome shotgun sequence  
MFKIFWLESVDDLARLKAFLEKASPKAASIAAKLIKNATNKLQEFPLIGQDVEGLEDFY  
DIFIEFGASGYHLRYRVFNQKIYIIHIKHARELSFK

>gene\_1334|GeneMark.hmm|348\_aa|-|25584|26630 >NVVL01000057.1 Rickettsiales  
bacterium isolate NORP64 Contig\_source1382A\_23831, whole genome shotgun sequence  
MSFSPKFQITNETTSALTAIERTRGFLDAATLSNEWIEQMQRALILEAYHTTHIEGTQL  
TLEQSEQLLAGKKLLDTPDDVKELLYRKA FELVADYLN VGEPITNGLVREIHKELVID  
VRGNSAAPGEYRKIQNYVNSKTGKPVYTPPPAFEVPIIMMSQLTDWINTESINPILVAG  
IAQFQFVHIHPFLDGNRTGRLLSTLCLYRKG YDFKKLFSISEFYDRDRANYKAIQSVR  
ENDMDMTNWLEYFTRALSTQMQEIRSNGEQIIKLDILKNKYKLNPRQQNAVKHIMKHGSL

TIKDYETIFPKINRRTLQRELKAMVEYNVIKADGLTNQSVYKLTNPL

>gene\_1335|GeneMark.hmm|241\_aa|-|26763|27488 >NVVL01000057.1 Rickettsiales bacterium isolate NORP64 Contig\_source1382A\_23831, whole genome shotgun sequence  
MKKLAIVTGGIRGIGAATSIALHEGGYNVVANYNNNHEAARKFTAKTSIRAASWDVSSSK  
ECRESVAKIEQEFEQTVSVLINNAGITRDGMLHLKLSAENWAEVIDINLSSCFNMSSAVIG  
NMRNQGFGRIVSISVNAQLGQMGQTNYSASKAGIIGFTKALARESASKGITVNAIAPGY  
IATDMVKQIPDKILAKIIEQIPVKRLGAPAEIARAIMFLIDEEASFITGETLSINGGHNM  
V

>gene\_1336|GeneMark.hmm|104\_aa|+|27583|27894 >NVVL01000057.1 Rickettsiales bacterium isolate NORP64 Contig\_source1382A\_23831, whole genome shotgun sequence  
MMSKIEKSDTIEISSVTDYLMRIFCLLSICLLVNICIAKAGIIRDSEIEEAVDLIVAPL  
REASGLKDLEVHIINNPINAFTAGGNKIFINTGLIINHPDPDI

>gene\_1337|GeneMark.hmm|51\_aa|-|3|155 >NVVL01000058.1 Rickettsiales bacterium isolate NORP64 Contig\_source1382A\_23838, whole genome shotgun sequence  
MNLKNGMMIFGLASAVSCGLSSQTYAACDAGFTTDSADFALEAVEDFES

>gene\_1338|GeneMark.hmm|179\_aa|-|315|854 >NVVL01000058.1 Rickettsiales bacterium isolate NORP64 Contig\_source1382A\_23838, whole genome shotgun sequence  
MRIKLAIIVLAVILALLFWPSTQKILFHTESEFGPIWVVEEDNQRRLSFNGVPAHLIQS  
QIHLDRPEHLVAPYNQMLMSSLFFTSNPKKILMIGLGGATTAKALNLLLPKTPIDIVEIN  
PALPPIAAEYDFDREDARNKIFIEDGVGFMKNAAKNSYDLIILDAFDIDYIPPGFLTLS

>gene\_1339|GeneMark.hmm|420\_aa|-|862|2124 >NVVL01000058.1 Rickettsiales bacterium isolate NORP64 Contig\_source1382A\_23838, whole genome shotgun sequence  
MIEDSDRIFTNLHGTESSGLQAAQKRGDWSKTKSLIQKGRDWIVQQVKDSGLRGRGGAGF  
STGMKWSFMPKDSKPSYLVVNADESEPGTCKDRDILRNDPHKLVEGCVLASVGMGANTC  
YIYIRGEFYNEAIIQLNAIDEAYAAKLIGKNACNSGYDIDIYLRGAGAYICGEETALLE  
SLEGKKGQPRLKPPFPAGFGLYGCPPTINNVESIAVVPTILRRGAEWFAGLGKPNNTGSK  
LFCISGHVNNPCTIEEEMGIPLRELIEKHAGGIRGGWDNLKAIIPGGSSVPMIPKDV CET  
VTMDFDSLRAVGSGLGTGGLIVMDKSTDIYAIARLSKFYMHESCGQCTPCREGTGWMWR  
VMMRLVKGDARPEEIDELLDVTKQVEGHTICALGDAAAWPIQGLIRHFRGEILDRMKNLQ

>gene\_1340|GeneMark.hmm|242\_aa|-|2111|2839 >NVVL01000058.1 Rickettsiales bacterium isolate NORP64 Contig\_source1382A\_23838, whole genome shotgun sequence  
VSVRIRVRVRMRESEMRMKKLFGILLICIFSSLVASADSISGRFFVKGKSLDFDRSFHPI  
KAGSYTKGKPTKCHGTIVPELSHDDAGLFMTINRKIYDFVEIYGICNKDEQSNFSVSYD  
VPRSRSKNFFSVLWMTKKDDKLWRIDSLNFNFESEGNLLEVDIFNLLSNHMMGEMVKLSA  
GHLPKNTNWEQFLAKIASRDVQLYIKNREWHIVFNATANLDMVIDVKIPEYFLIGSRNND  
RG

>gene\_1341|GeneMark.hmm|189\_aa|-|2841|3410 >NVVL01000058.1 Rickettsiales bacterium isolate NORP64 Contig\_source1382A\_23838, whole genome shotgun sequence  
MSKMAKMSKTEVFSFNKENLKKAQEIIAKYPEGRQKSAMLPLLDLAQRQNDGWLSVA AI



ECVANHISEPYIRAYEVASFYSMYNLKPVGKYHIQVCGTTPCMLRGAEDIMKSCEKHALA  
KCGENSKDGLFTVSEVECLGACVNAPMIQINDDYEDLDPKKVGDIIKALREEAQSSGK  
SPAKEKEKA

>gene\_1342|GeneMark.hmm|405\_aa|-|3407|4624 >NVVL01000058.1 Rickettsiales  
bacterium isolate NORP64 Contig\_source1382A\_23838, whole genome shotgun sequence  
MRKQRNNKIVENMEAASEKTTTTINFGPQHAAHGVLRILEMDGEVVNKADPHIGLLHR  
GTEKLIEHKTYMQATPYFDRLDYVSPMCQEHAYALAVEQLLKCDVPIRAQYIRVLFSELT  
RILNHTMNIGTQAVDLGATPLLWLFEREKIMEFYERVSGRMHANYFRPGGVVADLPK  
GLLEDIATFSGQFLSRLADVETLLNNNRVWKQRLVGVGVVTQKQAMDWGFSGVMLRSGSI  
EWDLRKSNPYEVYDKMDFDVPKNGDCYDRYLVRIEEMYQSIRIIDQCIKQMPGEVKS  
LDMKISPPKRKDMKDSMEAMIIHFKLYTEGYNVPKGESYGVVEAPKGEFGVYLYSDGSNK  
PYRCKIKAPSAHLQGLDFMTRGHLMADVVSIVSLDIVFGEVDR

>gene\_1343|GeneMark.hmm|199\_aa|-|4602|5201 >NVVL01000058.1 Rickettsiales  
bacterium isolate NORP64 Contig\_source1382A\_23838, whole genome shotgun sequence  
MEYTHIIDFAKDNLSITPIDGFAAYRTSAGDVLSELLKFALEDEELRFSVLTDLFAA  
DFPEREKRFELVYSLSLKLNKRLIFKIDLAEGETAHSVTSLYSAACWCEREVDFDMFGIE  
FSGSHDMRRILTDYGFKGHPLRKDFPLSGHLQVRYDEKLEKVIYEPVMLEQEYREFDFTS  
DWKGPEGYVLPGDEKAKKQ

>gene\_1344|GeneMark.hmm|170\_aa|-|5207|5719 >NVVL01000058.1 Rickettsiales  
bacterium isolate NORP64 Contig\_source1382A\_23838, whole genome shotgun sequence  
MKNNLQTGLKNNFDEGLSNRGYVLTAKIDLTGWARSNSLWPMSEGLACCAVEMMQTASS  
RYDMDRFGFLFRSPRQADLMIVAGTLTNKMAPAMRRVYDQMAHPKYVLSMGSCANGGGY  
YHYSYSVVRGCDRIVPVDVYVPGCPPTAEALLYGLMMLQRKIKRTSRFKG

>gene\_1345|GeneMark.hmm|128\_aa|-|5727|6113 >NVVL01000058.1 Rickettsiales  
bacterium isolate NORP64 Contig\_source1382A\_23838, whole genome shotgun sequence  
MLNNMLQNLDFLSEYLPPIAFFCVATILSIVLVALPKILAKEKPKDKLLSYECGFDAFG  
DARGKFDIRFYLVAILFIIFDLEVAFLIPWAINLKAIGHFGFWSMMVFLVLTGVGFAYEW  
KKGALWE

>gene\_1346|GeneMark.hmm|611\_aa|-|6366|8201 >NVVL01000058.1 Rickettsiales  
bacterium isolate NORP64 Contig\_source1382A\_23838, whole genome shotgun sequence  
MKKKILLTTALSLVPMFANGAGPVNTTYQGNNIFATDNQEFTGIIGVGGHLDADAPIMIAS  
DRNKYFRDMVQDNSILALMAGNIERLGRELKSNIPPEILQKATAFLAKVTKEKEKVLARS  
KMINENFDGDFSLIDAIQGVDPKNLTTAAIKAILQNADEKRRGEASVDCVVTPTTAPTA  
IAASSATTSSAPASAEDIKSQKELAHLQQSEQRYLRQQGGEKREKMLKDVQTDIDHHPRI  
EERRKSESTQEDFQDCLVDIADETDEAKKEALVKRLREDLRDYISPNIKRNTAPKRLVAA  
QQPETAALAMTKSVQTISRUVGGRMASLSHVGVSSGEAFESYGVWLKGTYSQGEQKAYD  
ARSGYKFDQKAVTIGVDTGEESLIGAAYSFSSGKATSKNNKDNKDDITAHATIYGKYAI  
TDKTFVSAQQGIGTATIKKQRDTGTSTIAKANPKASILGGKIELGYVMTLADNVAFIPTI  
GFDHASVKVKGTYIKGGTNKSVGKMTETRTSVIGGATMQYVHDTGHMKFSPEIHVNGKVA  
LSAKNSDTKIKFGLAPVTPSEEAARASYNIGASLKVARCMDLEVSAGYDFDASEKFTS  
HTGTLKLRVNM

>gene\_1347|GeneMark.hmm|82\_aa|+|8464|8712 >NVVL01000058.1 Rickettsiales bacterium isolate NORP64 Contig\_source1382A\_23838, whole genome shotgun sequence  
MAREVSSFDAKTHLSNLLSQVQKGQEFVITKHKHAVARLIPIKKS AKIRNTKQIINEIQD  
SSKSYSLNLAQGAPELKSIGRK

>gene\_1348|GeneMark.hmm|708\_aa|-|8727|10853 >NVVL01000058.1 Rickettsiales bacterium isolate NORP64 Contig\_source1382A\_23838, whole genome shotgun sequence  
MQGIKKVCVIGSGVMGSGIAASVANSKTEVILLDIADENPTEDKNSNDASSIARA AVERM  
FSAKPQPLLHPDFAKYITPGNLRDDLELIKECDLIEVIPEKLP LKHKLYDSILPYLKES  
AILASNTSTLPARELKKNL PENVQDRFVITHFFNPPRYMELLE FVSDDNTSADA IKRISE  
FVTVKLGKTIVACNDTPGFIANRVGCFLEMMVVRKAIERKLD PVKIDQIFNKLLGFPKTG  
IFGLYDLIGHDVMGLISESLKSSLPKGDYHDISKGSPVLRK MATKGLLGRKSGAGFYKL  
TKNNGKRTKEVIDFTRMKYSVVSTKTIPKTIAELLEGN NKYSKFFTEILADFFSYAISLV  
GVVASDSGDIDKAMRLGYSLKYGIFELLEERIPSGMDWLRKASKNDALHYEPSSALRIDA  
WYDIAKNVTSNDSAMLLDYKNQHIFVITSKMNSLNHDVFNLLIDSVARSED TGKNLYICQ  
SDAPNFSAGADLKFFYDNIEESNFKAIEDFVELGQKAMMALKY SKASIISCAHGVALGGG  
CELLHSDFFVVAHQNLSAGLVELGVGLVPGWGGVKEMFLRSGGDEQKLLQNL SNILLQSK  
SRSAEYFAQEYGVDSLINMNKSLILEEALAIKVPKPKLNLVNLPPISLAASIDSTNFDE  
LQLSVMDFQIIDLKIIDEFSLLELEKEKFLRLAAKPLCLKRLNRFV

>gene\_1349|GeneMark.hmm|143\_aa|-|10888|11319 >NVVL01000058.1 Rickettsiales bacterium isolate NORP64 Contig\_source1382A\_23838, whole genome shotgun sequence  
MRNDLGVKLI AVL DINS LKLYKAQGLKIIDEVGCFLIHS DVNHKTEKHEGFKGQKSTPSS  
FYDPHSSAKDIEYRESSKVAINH IKKIFASDREYKELFVVAEAKMLGHLRQYL TSGLKCC  
LNKEIKDLIHHKMKDVEKAVFA

>gene\_1350|GeneMark.hmm|70\_aa|+|11435|11647 >NVVL01000058.1 Rickettsiales bacterium isolate NORP64 Contig\_source1382A\_23838, whole genome shotgun sequence  
MSGRIKIIPV FYKFKQGRFPKVS LIISLKLIDIFATVVNM RASAAWQRHFHPSIVNAL  
TINLRFCKNS

>gene\_1351|GeneMark.hmm|417\_aa|+|11644|12897 >NVVL01000058.1 Rickettsiales bacterium isolate NORP64 Contig\_source1382A\_23838, whole genome shotgun sequence  
MTNRIKETKETEATEVTE DAKIAKATAISLEDVAVSKASKRSKATKTPKPKSYPKSSSN  
NNKKMTPHDKL FKS VFDNEANGRAILEKHL PEDLKKHLDLDHLEIEKDAFIDEDLKAKMS  
DIIYKVKTKNPKRDGDVILFLYEHQSSNDKKMMLRLWR YAISSWEPYLARGKKLP IVASL  
VLYNGKGKYTSYRRFWDLFTNPELAEKIMSSECLIDLQ SMPDEEIFADKEFGLFKYFMK  
NIRRNKVIELWKECFEKLPEHIEIDKKQKLFYIKRLWSYTEDKVPIEKKKELTSFILKQI  
KKMGVNGVKT MKTIADGYREEGLEEGIFIGELRGQKIGEKIGEKIGEKIGQKIGEQIGQK  
TGKKMGAEMERKKT VIRMLKGNLDPKFIS SMTGMSQGAISKLRTQLKFEGKLEQDIA

>gene\_1352|GeneMark.hmm|433\_aa|-|12894|14195 >NVVL01000058.1 Rickettsiales bacterium isolate NORP64 Contig\_source1382A\_23838, whole genome shotgun sequence  
MFYIPIISSAILAVILLYFIYSNVTLRAKMKFLEQVTAESSLKNTELESEKIRHIQKIEQ  
LSGSLEHQKQFIADFEKLRAESHNSTKAALFEMGGELS KQLIDMHKKESKEHREVSDKSV  
KDASVKFNSEFERIVNMVGALSKEVSQSKD TVDVIKNSLLSPSGAGCLAEITLENILNAS  
GLRKSLDFIMQYSVVGEEKEILRPDAVVFLPSDKLMIIDAKASKFLVDDQGD LKLNARTM

NLHLRSLSSKSYSEVVQKSLKKNRIAVGNVVTLMFLPSEHAIEKLIADTEFMTKAWKSN  
IFPVGPAGLMNMLSLFAKFQISETMMAHNNHQQIIDEVKKLIASIGSMAEHSMLGSSISSL  
VSHYDKFAASFNRNFLSKARNIGKMGIEEALKKQNSLQRMQLVASQPELIEIEAENEIGS  
EVGKIEEKLREQA

>gene\_1353|GeneMark.hmm|271\_aa|-|14213|15028 >NVVL01000058.1 Rickettsiales  
bacterium isolate NORP64 Contig\_source1382A\_23838, whole genome shotgun sequence  
MSRTKKHRIFVVGNEKGGAGKTTCSMHLIVGLLDGRGYKVASIDTDSRQHSLTTYINNRKE  
YNQKNPKSRVAMPLHFHLKESVHKLLEEKNKHQDQIQFDQAFNLAKKHADYIVIDTPGSHT  
HLSCIAHSYADTVITPVNDSFVLDLVIKIDTDSLEISKPSIYSQMLWEQKMERAEKDKG  
TIDWVVVRNRLSNLDAKNKRNVSALTKLAKRISFRVIPGFSERVVFRELFPYGLTVLDL  
KKANFIKSLSISHVAARQELRAFLDSLDIRS

>gene\_1354|GeneMark.hmm|504\_aa|-|15015|16529 >NVVL01000058.1 Rickettsiales  
bacterium isolate NORP64 Contig\_source1382A\_23838, whole genome shotgun sequence  
MLNISFENQDLYANEAIAVLIDDQLKMDSSAMEIDQKHHGLISKLIEDANKFKGETGOAL  
TLTSDKEGNLRNLIIVGIGDASKLKAYELEEEIGGTIYSQAKACRASSAGVAVGGHIGEF  
AESEASALLASGALLAAYKFDKYQTKQKDEDKCVTDEFNVVTGDHDAAYKAFEVKKSIAM  
GVYFARDLVTEVPNVLYPESYAEQIATRLEPIGV DVEVLGEREMHNLGMGAMLGVGQGSA  
RESKLVIMRYNGAADDVKPVCFVKGVTFTDGGISIKPSANMGDMKYDMGGSASVVGAMK  
ALALRSAKANVIGVGLVENMPGGNAQRPGDVTTMSGQTVEILNTDAEGRVLADCVTY  
LQEKFDPECVIDLATLTGAITVALASTYAGCFANDEELAKNLIASSVESNEKLWRMPLHK  
DYDEMIKSPIADMANIGGARGQAGSSTA AHFIGRFIKDGVKWAHLDIAGMAWNSSDKNPI  
CPKGAVGFGVKLLNQFVQDHYESD

>gene\_1355|GeneMark.hmm|330\_aa|+|16903|17895 >NVVL01000058.1 Rickettsiales  
bacterium isolate NORP64 Contig\_source1382A\_23838, whole genome shotgun sequence  
MKEEIKNEKSTKSNLNLKKAIQKEIIGQESLIENLLVCLIANGHMLIEGMPGLAKTT  
AAKAIADGIEGEFHRVQFTPDLLPSDLTGTEVYTHETGEFSFREGPLFNNIVLADEINRA  
PAKVQSALLEAMGERQVTIGHKTYKPELYMVLATQNPIEQEGTYSLPEAQLDRFLMYVY  
VDYPTFEEELQIHALDENKLNKRKDLLAVTTQEEIFSARACANDMHISDSLKSYAVSL  
VMATRTPKEYDDMLAGWIMHGASPRATLALIRCSKALAWLRGDEYVTPSHIQTVPFILA  
HRVILTFEAEAKGISRNRIIDRLLEVAVP

>gene\_1356|GeneMark.hmm|297\_aa|+|17909|18802 >NVVL01000058.1 Rickettsiales  
bacterium isolate NORP64 Contig\_source1382A\_23838, whole genome shotgun sequence  
MLYPDFNELLQLRSKVTRSSLVSDQRVKSSQVGDHLSFRGNGMEFEFVRQYVIGDDIRK  
IDWLVTARLGLPHIKVFKEERQLNVTLCVDMNHTMRFGTRGTFKSVQAARVAALLGWCAN  
VNNDSVGAYLFGDLPDGAEFFRPKSSRQSLWKMLKSLSDSGAAGGEYVPISSSIEFLHK  
ALQPGGLVFIISDFMNIDDEFRQQLCYLTRRSQVIFISVNDPSDMEIPNAGNILFAENDS  
RKIHISTASKSGAEAYRKQWQENRSKLERIASDLGIRSI NIRTNSDVIFYDLFYGLKL

>gene\_1357|GeneMark.hmm|185\_aa|+|18806|19363 >NVVL01000058.1 Rickettsiales  
bacterium isolate NORP64 Contig\_source1382A\_23838, whole genome shotgun sequence  
MEGITKNKELHGHAKQVNETLLARLREIDGLDAANWWPLAPIWWVIIVAMLAGFALLI  
RYLKLRAWRLSWKSDVFLELEQMENLTIENAQNTATLLSEIIRRVIMHNSHREECASLE  
GEEWLQWLAKHGDTMGAVNNTDNSTFDWRDNGRVLIEDIYAPSFSPDAMRRLANLINAIAK

DWVKK

>gene\_1358|GeneMark.hmm|337\_aa|+|19364|20377 >NVVL01000058.1 Rickettsiales bacterium isolate NORP64 Contig\_source1382A\_23838, whole genome shotgun sequence  
MFTFYWPLMVLLLPVPLIIWFFLPPDKNANSDSPELLFPYVQRLLTAFERKEVAPSDSK  
KYFIIMLSLLWASLVIALMRPQWADQMEYDHKKGYDIMLAVDVSASMEALDFSTLTKSIS  
RLDVTKEVVSNFAGRRKGDRLGLILFGEHAYLQVPMSEDTLAVSKMLNNAVSGMAGASTA  
IGDAIGIAVREIRSPPKSRILILLTDGADTSSNIPPIEAAKIAKHGIRVYVIGVGRSG  
PVPYPNQFGQISMVEIGMDEEMLAKIAAITGGQYFKATDSTALEVIYDKIDKMEKIEINM  
LGYKIRQPLYRYPLGFACILFLALCLMPLFKRSRYGV

>gene\_1359|GeneMark.hmm|618\_aa|+|20367|22223 >NVVL01000058.1 Rickettsiales bacterium isolate NORP64 Contig\_source1382A\_23838, whole genome shotgun sequence  
MEFSQSMESQFHFAHSYYFLGILIIPIIWWLYLHYYENNANTKDLENFADSHLVPHELLR  
SSKTGQISVVRSLVLGSLVWLLLMAAMAGPRWDFKEVETYKDDKSLVILLDLKSMDSAD  
ITPSRLVRARQEIEDIINSSKGVKVLVGFAGAHMISPITDDMNNIRRLPLLGTDLVF  
VQGTISPAFKTAKQMLLAEPGVNKSILVISDGGFQDDNHSIVKNLAGLGVVTHTLGVG  
TEKGVNFIGADGQPMMRGGQVLTSRLEKEKLEATARAGSGEYFNTHYSNENAKNILKLV  
GSMFGAGNKHANIIHWEERFYIFLAPLMLVLLLWFRKGFTFPILLVLLTPAPQVLGASL  
VDKIFLNKEQLAKKSFEVDDIGSALAAFDDPYKRGVAYYKAGMFKKAKEFRKNKRPEV  
SDSALYNLAGALAHQNKLDESIETYKLLKKNPNHKKTRHNMGVVRSMVFVKEEKKEQEE  
KKKPPKNEDEKFPSSGGGGGDEDEDEGESGDESDDSGKGDEKDDSSGEGDSDKDKGGS  
DDGDGKDSKDKKDSGGADEKKGDKDEDTSGDEASGKDEAEIDQLLDLISNDHKNFLKN  
QFQIESGNSKTKPTNDPW

>gene\_1360|GeneMark.hmm|615\_aa|+|22217|24064 >NVVL01000058.1 Rickettsiales bacterium isolate NORP64 Contig\_source1382A\_23838, whole genome shotgun sequence  
MVKKLFLFITLLHCLCSLALAAEFTATIDRGTIALNQKLVLRRLVDASPKSSPDFSGIR  
KVFIDILGTSRSTRSQWVNGQSSSLTEWQMSLAPKKIGSVSIPSISVKTGDGVLKTQQLAV  
KIKKAKPTPAKDEKIGVFIENSVSRRKPKYKYPFIYSVKLYTADAAENIRFEPLKLEDVS  
VKQNGSHSIYLYSEYKGVEMNVIEVSYIITPLKHGPITIPKLIKSGMHISMQGNRFDGIFG  
SFFGNQAQGDLFTRKSREFLLQSKEIKLDIQPPQKATPWLPQAQSLKESLSSDEFVRG  
MPITRSITTATGLTGKQLPEGGAGLRDNGDFQIYSETPEFTNNIKGSLISSSRKDTYSI  
IPQKAGEITLPVIRLKWVNLKSRPESASVPARTIKIAPSRMITAPEEDKAGKPGSSENA  
IKIGDNSASNSAWGFGADGGFANVLAYLFLAIFGAGGVFLYHFVDLSSLLKLLQKFRLT  
PVNSKEMAGGQAVLAQQQAVSDIIAKPAIALKDIDSVSSARELYEFLNKYAHYHFQTPSN  
SSLGKIFASMEKSCADIKKEEQYKNIIQKLEDSLYAGKEIDLASVRLECAELLKLAKKKQP  
SAKKRASSELPLNLP

>gene\_1361|GeneMark.hmm|348\_aa|+|24077|25123 >NVVL01000058.1 Rickettsiales bacterium isolate NORP64 Contig\_source1382A\_23838, whole genome shotgun sequence  
MHIVNIIYNKSDGGLEKIFLDYNEYCLQLGHKVTAIAPPDAMINPAIRAQVPIIPSNLI  
ASSIHNKNPFAALYLRRIKRIKPDILIHARTLELIQKAAKGICSVACVHHGGKTKRL  
MRAKNVICVAKYMIEELRISGLENANFYVVPNSIKLTRNFTQAPLPKGNFPKGKCPVVIG  
YIGRLSHEKGV DILLSALTKEIPYKALIAGDGPLRVELEKSAKDHNLSAEFLGWISSAQ  
KDDFFNKCDMLLVPSRQEPFGLVILEGWLYGVPVSSKSKGGCELIQHKADGLLFDICDE  
KSLREALSMDKTTHQRLINGGRAKLERLYTPDHARELFDISAIGQLLN

>gene\_1362|GeneMark.hmm|63\_aa|-|25152|25343 >NVVL01000058.1 Rickettsiales bacterium isolate NORP64 Contig\_source1382A\_23838, whole genome shotgun sequence  
MTSNNKTYIAEEKEISSAFESDILAASDDSNIKVHAMAAKHFLKKSERINIRMINAF  
RSY

>gene\_1363|GeneMark.hmm|85\_aa|-|25541|25798 >NVVL01000058.1 Rickettsiales bacterium isolate NORP64 Contig\_source1382A\_23838, whole genome shotgun sequence  
MENEENADDINTVSRIAGAVAKGLFFALCAAYLFANMSRIFDGLKIAASITGALLMLGVWA  
MYNSCDPYEDDLLAGNLGNDDAEEV

>gene\_1364|GeneMark.hmm|312\_aa|-|25892|26830 >NVVL01000058.1 Rickettsiales bacterium isolate NORP64 Contig\_source1382A\_23838, whole genome shotgun sequence  
MKNYTIIALALILSSCNATKSPAPIEYNHPGSTLGGRPEASDDEIISRELASMMQPETI  
TPYEGGARTGLQSSIVDEAIIYHEVQVGEELKDIAQKYKQSASDIARLNNLYPPYDLE  
EFQIVKVKATREFTQNTSQYSGNQDLAEMKGDLSAAESKAASGPAKSASDLADGQKSVAT  
KPADKLDIAPVKGRVLTKFGKTKYGINKGLNIAAKQGTKVLAATSGRVIYSDYDATFG  
YLVIKVNKNIVTSYAHLEDLILSKGESVQQGNVVGYVGGTGVAKSQLHFAIREGKIA  
KDPLEFVSYSEK

>gene\_1365|GeneMark.hmm|145\_aa|+|26914|27351 >NVVL01000058.1 Rickettsiales bacterium isolate NORP64 Contig\_source1382A\_23838, whole genome shotgun sequence  
MPNYDLAIASDHAGVCLKAKIMASLKAKAIKTLDLGANASDDRVDYDPYAKKMVEEILEG  
SPESGILICGTGIGMSIAANRSSEIRAALCITEPMAELARLHNDANILVLGSKLIDDKLS  
LKIVDKFLSTKFEGGRHARRIAKIS

>gene\_1366|GeneMark.hmm|124\_aa|+|1|375 >NVVL01000059.1 Rickettsiales bacterium isolate NORP64 Contig\_source1382A\_23852, whole genome shotgun sequence  
DELVSFMLKQINKIGNNGEKVMKTIADGRREEGWKDGLNEGISIGEERGEERGEERGKKI  
GEKIGEKIGEKIGEKKGVEVERKKTVARMLKENFAPKIIASVTGMNQRAISKLRSQLQLQ  
GKLV

>gene\_1367|GeneMark.hmm|466\_aa|-|456|1856 >NVVL01000059.1 Rickettsiales bacterium isolate NORP64 Contig\_source1382A\_23852, whole genome shotgun sequence  
MKYDEQLLDAVLRDFGSGFIGKVFHSINPGASYHANWHIDLIADYLEAVRAGEIKRLIIN  
MPPRALKSVCVSVAWPAWLLGQDPAARIMAASYSSVLSVKHSLDCRLILSSNWYRRVFSK  
TILSKKHQKSKFLTQNGFRFATSVGGSATGEGGDVLIIDDPHNPTQINSLKMRSRAIE  
WFEQTFVTRLNDKNKGAVLVMQRLHEDDLAHLCSGGWEVLKIPAIAPSDMVYDIGKN  
SYKYKQGELLNGKRDKLEFLHNIEQEVGSRNYAAQFLQEPLPAGFNLLKADDISYFETLP  
VGFEYFVQSWDTAIKTSEKADYSVGTGCVGLDKKYLAGMVRKMSYPDLKREIEKQANK  
YSPRHILIEDKASGQSIIQDLKLSGYNNIVPITPKLDKVTFRFASIVALFQSGQVVLPEKA  
GYKRELISELTSFPNVAHDDIADSIQFLNFSKNMRDSTKLRVRL

>gene\_1368|GeneMark.hmm|86\_aa|-|1874|2134 >NVVL01000059.1 Rickettsiales bacterium isolate NORP64 Contig\_source1382A\_23852, whole genome shotgun sequence  
MKPTIEKLYGFIARLVSMLEEEDELGANKSKSAITVKRNITDTLNKLVTLIIQLNKLSK

DDMTQNNESLPSEDAEIIERFLKKYQ

>gene\_1369|GeneMark.hmm|397\_aa|-|2136|3329 >NVVL01000059.1 Rickettsiales  
bacterium isolate NORP64 Contig\_source1382A\_23852, whole genome shotgun sequence  
MLKTYFKNLTKRRSEKSKSFLDIPFLRGESDDRVAESYKNNNAIVHRCVSLIASSASHVP  
WQIYKNNNGERKLQKNHPSVRLKPNPEKSGADFFTSISTLLLYGSSYMLLGFDKKGGK  
PARMYNLHPNNVEFVHKNHLVGYRHRAGGQEQIFHIDPATRMSHILHLKNYNPTNPEAG  
SSLSAAGKSINLHSKIMDWNKSLLRNAIRPSGALVFQDGNGLTDEQFSRLQQQFYDNF  
SGSSNSGKPLILEGGLKWQETSNAEKFEKFDLKDSSAREIAIAFNVPPQLLGITGDNTY  
SNMQEARFALWEENLMPLLDKYADALGSWFSCWFGHEELIVDFDRDSISILGERRENLWAK  
IASADFMINEKREFVGLDPIQGGGERLNSHVNNNDNEQ

>gene\_1370|GeneMark.hmm|424\_aa|+|3577|4851 >NVVL01000059.1 Rickettsiales  
bacterium isolate NORP64 Contig\_source1382A\_23852, whole genome shotgun sequence  
MNLQKIFADRKQRQIFILGIYSGMPLSIIYSTLPGWIKGAGVDIAIITTLALARIFYSLK  
FLWAPFVDQIRLPILHKLGRRKSWMCLMSGIIAFIIFSYSRLSPEESFSEIYILTALGF  
CSATLDIAIDAFRIDTIKKEQQAIAAANAIVFGYRVGMLVSNAGVFFMIEDYGWEVAFMMV  
SSLYVAGLFFMMLTKEPKIEQEEFNILTAHSWKVMTINPFMDFLQRKGAVLILLAVVFK  
LGDAMLGVVATPFYELGFSYKEIAAIAKVFLIATLSGAYIGGFVMYRFGSFKGLIIGA  
IAQSITNLSFIWLNHMGHDTALMVTIVIENIASGMGDAALVGYLSHLCNKQYSATQYAL  
LSSASGLFSHSIVTFGGTMVKAMGWNMYFLMTVFLAIPGIVLLLYLNKKDGFADYDKATI  
KRSS

>gene\_1371|GeneMark.hmm|59\_aa|+|5018|5197 >NVVL01000059.1 Rickettsiales  
bacterium isolate NORP64 Contig\_source1382A\_23852, whole genome shotgun sequence  
MKCCIRIILSIISLFFVLSCTPGAPYEVRSPCVSSGDSGHTYGVNPCVRRPLNMKYAIV

>gene\_1372|GeneMark.hmm|236\_aa|-|5234|5944 >NVVL01000059.1 Rickettsiales  
bacterium isolate NORP64 Contig\_source1382A\_23852, whole genome shotgun sequence  
MIDTIMLFAAGLGNRMRHLTENS PKTLIPILGKPIHHALEMCKSYPFKKVVINTHYLHE  
KIEQAIKDFQDSNPDFPEIVVIYEEELLETGGAVKNAQDILGDKPIFTLNTDIVMQSDDN  
IFNYMNSHWKPKTMDFLLMQPYDKSVGYSGHGDFDLSDGRLIRPDKEEHYNYMYAGLQ  
ILKPEKVARHPLKIFSLREYYLNSEKVIPLPAKNVRWYHATKPEDLIDIEMDMLAN

>gene\_1373|GeneMark.hmm|369\_aa|-|5952|7061 >NVVL01000059.1 Rickettsiales  
bacterium isolate NORP64 Contig\_source1382A\_23852, whole genome shotgun sequence  
MPAYVAERGALLKEFIQDKFLQIDKIEGILGDAGLRSYSRIYSGGESYIIMDCPPDYCSV  
QPFMDVAKYLAEQGFVSPKIIHHDVEHGFLALEDGFSVSVKDYLLQANPEEHKRIYHLI  
IDLLIDAQDKSDVGNAEIGKLVSGSVEPGKPGSGKPGSASLGKSNPALDSCAANKSESTF  
GTFDNELLASELQIFIDYYIPYAYNRELSIGELEEEMEIWSNILASQDPMPDSFIFRDYH  
VENMMYLEHRDSIKKIGLLDFQDAFLGSPYIDLVSVLEDARFNVPRDALAYIGYFTQKK  
ELNLEHVLARNYHILGAQRNSRILGVFARKASRDGDSYIKYIPRVLQYLDYDLSHSSLVV  
LKAWLEKLLK

>gene\_1374|GeneMark.hmm|424\_aa|-|7066|8340 >NVVL01000059.1 Rickettsiales  
bacterium isolate NORP64 Contig\_source1382A\_23852, whole genome shotgun sequence  
MSKESKSSHCSFCGKGELEVKKLVAGPAVFICDECIVLCRDILKEGAKEEIEEKFSI

PTPKEICKTLDDHVIGQDRAKKVLSVAVYNHYKRLESVLADDDDDGVELNKSNIMLIGSTG  
SGKTLAQLAKILDVPTMADATTLTEAGYVGEDVENILLRLLQASDFNVEKAQKGIY  
IDEIDKIAKKSNDVSVTRDVS GEGVQQALLKIMEGTVAHVPPQGGRKHPQQDSIQIDTSN  
ILFICGGAFMGLGIITARGDN SIGFAAKVQSKEEMRHS EILKDLQMEDLIKFGMIPEF  
IGRLPVVASLKDLDKAALIQILTEPKNAIKQYKCLFDINEANLEFTKDGLEAIAEKALK  
RNTGARGLRAIIEILLED MYNFSEL TNKTVTFNKESVKSSSSVIVNGRKKPANSSMSKK  
PIAV

>gene\_1375|GeneMark.hmm|202\_aa|-|8405|9013 >NVVL01000059.1 Rickettsiales  
bacterium isolate NORP64 Contig\_source1382A\_23852, whole genome shotgun sequence  
MQVGYVPIVVEQTAKGERSYDIYSRLLKERIVFCGEFEDHMANLIVAQLLFLEADNPEK  
DIYMYVNSPGGVVSAGLAIYDTMQYIKPKVATLCIGQACSMGATILLAGEKGMRYTLPHS  
RVMIHQPLGGFRGQATDIEIHAKETMKVKATLQEIYAKHTGKTVAHMAKIMERDHFMSA  
EAKDLGLVDKIIHRDLIKTEK

>gene\_1376|GeneMark.hmm|139\_aa|-|9162|9581 >NVVL01000059.1 Rickettsiales  
bacterium isolate NORP64 Contig\_source1382A\_23852, whole genome shotgun sequence  
MLIVKDKLTISI ELIQGVFMGRRIFLLIVITSLVWGGDWLYRAYEVKESEIPTSKISDLK  
VILYSKEICAYCQSAKNLLDKKGINYEVVELTNNKDLHIKLINQTGQSTVPYVFINDKFI  
GGYQNLLELDEAKGLECSD

>gene\_1377|GeneMark.hmm|778\_aa|+|9694|12030 >NVVL01000059.1 Rickettsiales  
bacterium isolate NORP64 Contig\_source1382A\_23852, whole genome shotgun sequence  
MLSKNLERTLRKALSIA TEHKHEYATYEHLLLAIMGDRDVRLVLDRLSCITDIENKLT  
YLKNNLVDLVDKNIKDSMPTAGFQRRIQRSAMHNQTNGQLPLTAVHVLAEFFFEHDSYAL  
LCLKEFNLRKDVLDYAKRLDDIHKTLYPQNTPPHRALIANVAKDKNASPKQVKSSDAKE  
SDLEKYCVNLNEQAGSNSIDLLIGRENEIQR TIEILCRRKKNAILVGEPGVGKTAIAEG  
LAVKIVNKDVPDILKDTVIYSLDIGSLVAGTKFRGDFEERIKSILNTLKANKNIVLFIDE  
IHTIIGAGSTTSGAMDASNLLK PALAKGDLRCIGSITFKEYHNHFEKDMALVRRFQKIVV  
EAPSEEEFNILQGVKGYEKHHNVTYTDEALKA AVHLSERYINDRHLPDKAIDLIDEAG  
ARSSMAHDPE DGTIITEKDIEVLLSAILNIPNL TIEADEIKQLKHLSSDLKRRIFGQDEA  
IESLCGSIKLGVAGLRKGRPTGCYLFTGPTGVGKTELAKQLSNCRNMKLLKFD MSEFVE  
SSSISKLVGSSPGYVGF DQGGLLTAEVDKYPYSVILFDEIEKAHPDIFNLLLQVMDEGTL  
TDNTGKHINFTHSMIILTSNLIAGDTKAPIGFSNKPAGQEEKKEPNMENINEHFSPEFRS  
RLDKIIIFNPIDGIVEKIVSKNLKELASMLADKKVRLTISKSVIKYFVENCFSNASGARG  
LDRMIDTKIKQKI ADEILFGKLGQGGTAILDFSKKDKEITFKFSKVKTTKNEQCETS

>gene\_1378|GeneMark.hmm|137\_aa|-|12176|12589 >NVVL01000059.1 Rickettsiales  
bacterium isolate NORP64 Contig\_source1382A\_23852, whole genome shotgun sequence  
MKNKRNIDLTLP AEQLRNALSSLSALDTPAEDRFLIDASIQRFEYSIELFWKFLKKIL  
QREGRPVQLPREILKESFQAHLIDNEQIWIDMLIDRNQTSHTYNEDLADEIYQRIKTTHL  
SEMLTSFESLVKKYEIF

>gene\_1379|GeneMark.hmm|100\_aa|-|12579|12881 >NVVL01000059.1 Rickettsiales  
bacterium isolate NORP64 Contig\_source1382A\_23852, whole genome shotgun sequence  
MQLPHDISHYKFWQQLASLPFLDKIYLYGSRARGDNLERSDIDLAICCPNAKKYDWQKLV  
YIIDNSDTLLKIDCVNLDNLNDDNQLKQNILKDGVVLYEK

>gene\_1380|GeneMark.hmm|514\_aa|-|13018|14562 >NVVL01000059.1 Rickettsiales bacterium isolate NORP64 Contig\_source1382A\_23852, whole genome shotgun sequence  
VQKISKWKMMIAILVITITSIIYVTPNFNTTKSSWLPEDTVNLGLDLRGGAHLLLRVDFDK  
YMDDVSQSVAESLRKNLRSDKIRYRNLHVS RNKIQFDLRNLDQAKINKLARTIDANLSA  
VKEEGKITLFYDEYAINQLQDKVIDQSIEIIRMVRVDSTGTKEPSIQRQGTQDILLQVPGE  
DNPAELQRVLGQTAKLTFHLVDEGANLERARSGHAPT GSMILKSGDDQEGVLVVKKKIIV  
QGDQLNNAQAQFQEGEPVVHFSFNHLGAKKFAEATTKNRGRR LAIVLDGKILSAPVINGP  
ITGGEGVVSNGFTVEAATELALMLRAGALPAPLSVIEKRTIGPNLGADSI ESGKMASIVA  
FGLVVLFMLLSYGILGLFANITLV LALLYIFAVLTMLQATLTLPGIAGIILTIGMAVDAN  
VLIYERIKEESAKGCSNLYAVKVGFE SAFATIMDSNVTTLIAAFLLYTFGVGAIKGFAVT  
LTIGILASMYTALVITKLMIDIWLKLCNPKSLGF

>gene\_1381|GeneMark.hmm|149\_aa|-|14593|15042 >NVVL01000059.1 Rickettsiales bacterium isolate NORP64 Contig\_source1382A\_23852, whole genome shotgun sequence  
MISSAHAREETDTITIQNSEGAETSMPSMESGFASLV PMLLIFAVFYLLIRPQDKRRRL  
QEALVLGVKKGEDILT NAGLFGKVM SINDSDNTIMVRVAKDVEMKMLKSSIADIVSRTKP  
DGDKKDSKKGDKQEADKKNPATKAKPKKK

>gene\_1382|GeneMark.hmm|587\_aa|-|15124|16887 >NVVL01000059.1 Rickettsiales bacterium isolate NORP64 Contig\_source1382A\_23852, whole genome shotgun sequence  
LILERKLGAKILITRLIKDHVSLYKKKIFTAIFFMVIVALCSAAVVKLVQPAIDLIFVEH  
DREMLLIPLVMLAIYAIGVAEYFQNYLIK YIGQKILTNLQMRMYEHLLSADFLFIQSQ  
SSGRLISRFTNDIMLRGAVSNMLVGC AKHFLSVFFLILIMFSLDPFLSAFIFLAFPAAI  
YPIQKLGRMRKVTSEAQQELGNFTAMLDETFDSIKVIKFCSEKIEVTKAQKITDTILE  
LYKKT SKLDSLTPIMEILTGFAITCVLWYGGSEVIEGRMTTGALMAFITAFVSAYRPFK  
SLVALNVNLQEGLAANRVFNILDSAPS VADAADAVSPEFAKAGIEFKDIEMNYGNRVGI  
KSLDLKIKPGQTYAFVVGKSGSGKTTLANLLV RFFDPTKGQILIGGHDIKQVSLQH LRNNI  
SMV SQDTILFDASVAENISYGNKKASREDIINA AKAADAHEFIISLPNGYDTAVGTAGSS  
LSGGQKQRLSIARAFLKDAPILLLDEITSALDPNSEQSIINSLERLRKDKTTLIITHRLG  
GITNAHQIVVMKQKGKIEQGHKHELLAKGQEYYKLYNKELKDTTKAV

>gene\_1383|GeneMark.hmm|252\_aa|-|16968|17726 >NVVL01000059.1 Rickettsiales bacterium isolate NORP64 Contig\_source1382A\_23852, whole genome shotgun sequence  
MTKFSVKNYREPIGKFKEINIVSDKLPPKILVIEPDLTLNANVCNAIERYWFDVIRTSDA  
DAALRISEINPPNMAIISSRKIDMSAIEISVKLRKIAELQDLPLLFLIEKDEPESNYNLP  
NSGYMELLHRPFTPNELMISIRSILRKS KPVFQDKIIGYDDIKMDLSTYQVFRGDKRVHL  
GPTEFKILQLLVLPKNIYSRRQIIDYVWGADKEIAPRTIDVHINRIRTM MKEEKDKHLL  
IKTIRAAGYCLD

>gene\_1384|GeneMark.hmm|129\_aa|+|17921|18310 >NVVL01000059.1 Rickettsiales bacterium isolate NORP64 Contig\_source1382A\_23852, whole genome shotgun sequence  
MAFYESIIRQDVSSTEVDRIANEFQ QIIKDHNGRVIKTEYWGLRQLAYEINNNKKGHY  
YFMGIEATKPLLDEMDRKIKLSESIIRSS LIKVDEVSKDPSPLLKVDNAGSEKTV DVTNK  
TSDKKPSAV



>gene\_1385|GeneMark.hmm|97\_aa|+|18345|18638 >NVVL01000059.1 Rickettsiales bacterium isolate NORP64 Contig\_source1382A\_23852, whole genome shotgun sequence MSREYSSNSRSAGAQTTSRGSKVFRRKKNKGCSMCSTSAPAIDYKDPPELLKGFISEGGR MLPSRITSICKHQRPLKKAIKHSRVLALLPFVLLNK

>gene\_1386|GeneMark.hmm|207\_aa|+|18680|19303 >NVVL01000059.1 Rickettsiales bacterium isolate NORP64 Contig\_source1382A\_23852, whole genome shotgun sequence LEAMEVILVKPDRKLGKVGGETVSVANGYGRNYLIPQELAIRATKENVEKFASLKKDLEAK NDNKNKVDAAEKVAKTLEGKNTFITQSASDGRLFGSVSAKGLAIELSKLTGTTLSYSNIK DDPIKFNGVYNIQLVLHAEVITNILVIVAKSESEAQDALREYLEGDKEEDESEIEAAAL AAAAAAPTDAASDAEGTDADSGHAGE

>gene\_1387|GeneMark.hmm|600\_aa|+|19700|21502 >NVVL01000059.1 Rickettsiales bacterium isolate NORP64 Contig\_source1382A\_23852, whole genome shotgun sequence MADLVEKDRSIPKLPKTLFPFIWYFLRSFKPAVIFILLAILAGLWAPFNSILIKNVIDL LPQAQNGDLSILLPVSLIVLNFILFDNFTWRGITYIRCKFVPVIINRIIGQSM DYVVLGQ SHQFFQDNLSGKISKQITNLADSIKITSVIPNFLRGASLVLTAFVAAYFVNPVFCLIL ITWFVCFVSTSVAMSKKLVALSDSQA AAESLVV GELVDVVS NQTNVRIFSKNSYENLRMT PFFNAQQKTYHNTYFYALIMHSIQGVMIAIMMGFSGYFLLYYGKNLVTIGDFALIFGLT METGHMMWFTMSELDEFNKALGRCKQSFFALMTPLEIQDKSDAKLLESCGGQISFSKVKF HYKGSEPIFQNK SINIKSGQKVGLVGYSGCGKSTFVN LILRLYDVTEGAILIDGQDIRDI TQDSLHENIAMIPQDPNLFHRSIMDNIRYGRTRATDEEVIESAKKAHAHEFIIKLPQGYSLVGERGVKLSGGQRQRIAIARAILKNAPILILDEATSQLDSVTESLIQDSLWELMQGKT TIVIAHRLSTLLHMDHVLVFDQ GKIVEEGTHGSLLEKASLYKKLWDAQLGGFLGDH SKED

>gene\_1388|GeneMark.hmm|360\_aa|+|21670|22752 >NVVL01000059.1 Rickettsiales bacterium isolate NORP64 Contig\_source1382A\_23852, whole genome shotgun sequence MDLQDYRINERLNLKPEIVEEVYSIIAEIDAVKNSWQITDKIFPQNIERLTRSVIVTSTG ASNRIEGNRLTDDEVENLYKNLRVKKFKTRDEQEIAGYLECLEIIFNNYS DIKITESSIT TLHHDMLTYSEKDKRHKGIYKFGSNRVEAKDNSGNIIGVIFDPTPPYLVRKEMQELVDWY GKASKVKIKHPLITIANFVFEYLAIHPFQDGNGRTRSRLLTNLM LLQQGYAFTQIVSHERL IEAKKVDYYSLNKTQSTWKTEKEDVSSWLLFFLNIVKSQAIQALSIIEGDDIEYLLSEK QLAVWNWINDNKMEFSRKDIIAALGLAPRTAESIVKFKVDMKRLQSLGQGKATRYKLIHR

>gene\_1389|GeneMark.hmm|559\_aa|+|22844|24523 >NVVL01000059.1 Rickettsiales bacterium isolate NORP64 Contig\_source1382A\_23852, whole genome shotgun sequence MKISLCQTAPRTGDLAGNFADIWQHLYAALNKEADICMFPELSTSGYLAEDLFLKESFIQ DVWARARELIKNTGKTCLVLSMPIMQDEMLSDGAQLGSDENPIDNQKLSNHQKPGNNYSL YNAVIVAQNGKIIGTTYKHQLPNGSVFDERRYFKPGVPAVISINGTSVGM PICE DIWSPE VCAELKKQGAELFLV PNASPFEKGKMDERITHVQSRFKETQIPILYCNQALA QDGIVFDG NSFCFDGGLQIVGKSFEVDSQIIEVRGNK FHPERSYDREENS YEEGSCEEIYKAMVLGTR DYVRGNGFSKVLGLSGGIDSALVA AVAVSAVGRENVLAYMLPSNFTSQESMRDAQEMAD SLGIDLMTISIMDAVGS LAGTLGLEEGSISHQNLQSRLRGTMLMAESNRLGALLLTTGNK SEYATGYATIYGDMNGAFNPVKDLYKTELYKVAHHINAHHYAFPERVLCKAPSAELSHDQ KDTDSLPEYPVLDQILERYIEQRQSQA EISKDFDPEIVERIIGLVNRAEFKRKQAAPGVK ISSMNF EKDRGY PITNHYK

>gene\_1390|GeneMark.hmm|96\_aa|+|24625|24915 >NVVL01000059.1 Rickettsiales bacterium isolate NORP64 Contig\_source1382A\_23852, whole genome shotgun sequence MNFRPLHDRIAIAKAVATEEKTGGIIIPDSAQEKPMQGEVVAVGTGARDQNGNIIPLDVQ VGDIIYVGKWGGNELKVDGEDLIIMKESDVMGIIKK

>gene\_1391|GeneMark.hmm|549\_aa|+|24948|26597 >NVVL01000059.1 Rickettsiales bacterium isolate NORP64 Contig\_source1382A\_23852, whole genome shotgun sequence MAKQIKYGTKAREEMIKGINILADTVKVTLGPKGRNVAIEQSFGAPRLTKDGVTVAKAIE LKDPNQNLGAQLVKSANKTADTAGDGTTTSTILTQAIVKEGNKAVAAGSNPMDLKRIGID LAVAHVLETVKKASKAISTQEEIAQVGTISANGDKQIGEKIALAMEKVGKEGVITVEEAK NFGFEVDVVEGMMFDRGYLSPYFVTNSEKMIVELDNPYILIFEKLLSTLQPMLPVLEAVV QSSRPLIIAEDVEGEALATLVVNKIRGGLKVAAVKAPGFGDRRKAMLEDLAVLTGSQVLV SEDLGMKLDNVDLSMLGSACKVKISKEDTVVIDGAGNAADLKARCAQMRQQAESTSDYD KEKLQERLAKLVGGVAVLVKGGATEVEVKERKDRVDDALNATRAAVEEGVVAGGGTALFY AAKALDGVKGANEDQQAGINIIKKALQAPIRQIAENAGIDGAIIVGKLEDSKSTTQGFNA QDMTYVDMIKEGIIDPTKVVRTALIDSASVASLIITTEAITADPSAKEGAAPAGGGMGG MGGMPGMGF

>gene\_1392|GeneMark.hmm|129\_aa|+|27002|27388 >NVVL01000059.1 Rickettsiales bacterium isolate NORP64 Contig\_source1382A\_23852, whole genome shotgun sequence MSEVIEEIKRAEESVVTEENVATKTLKTNKETKATKETKTPKEADAAPAPPADRPKSTSK NNKKRSPHDKLFAIFGNEASARGILKKHLPEDIKLLDLHDKVERDTFVSEDLKESMS DIVYKIKTK

>gene\_1393|GeneMark.hmm|710\_aa|+|146|2278 >NVVL01000060.1 Rickettsiales bacterium isolate NORP64 Contig\_source1382A\_23925, whole genome shotgun sequence VSKKLVYFQSKGVDQLRPGSDINSALSEAVIQKNAVVEQLLKQGADPNIMHSDGKPLLY SAVSNKLTIVIRLLTTYGARIESVDDRIELFTDAKHECFEMILILATPYKFDNQTMLAA LNRVWYDDLDAATALLNLCDKTIQSYVMQLFAKPITREEFLCTLQTIKQCKINIPSQYRK NALDLAFKYPDDQSIGALIECGISQAAIITLATRLLTSSTDRDRLKYALTTIENLVGYSG VDFHKHGETPVFYAARQGYNWLIRMLKDYNVDIDACNIDGESPLFFAAKHGHVNVIKRLI KYGANPNCVNSKEETPIFYAAKQRHTLIVERLIKYGADPNITNVVHKTASYLLECDVRE NLILAINVGYDNVVRKLELNDTDIDYRSLTLPDQHGKTIYYIFRTDMVEKIKSNTQL NQQMLELMQEYGDQLNIMLETCQIDLPTIFEYMQQHDIQFQWSVSSRYLGQQRQGSIKLD TQHAHLGHRVAIEKFLVHECVHAVTSDYYSYNGRPYPYSEDDPGKNSGFDILCKQVQST IDTHKHTRLHSSNLILISFCATLCQGFYDTESGKHTEVPARMAETMAVFGWRNTVIMMQ YHFPKLMAYFEKLIPDQNNDFLGTLLQPLLKDVFILQNIQKSEFNGYRSGTIPKLCIGYSA HEYSPQYVGTLLLDYNLSNPQNMVYDEIEMAVQWAAISGETIDVICDFVC

>gene\_1394|GeneMark.hmm|53\_aa|+|2771|2932 >NVVL01000060.1 Rickettsiales bacterium isolate NORP64 Contig\_source1382A\_23925, whole genome shotgun sequence LHSFHKPEGALNLQGFQFKLQGARQGGVFLIDLPAACKSMFQKIVFILDKLCV

>gene\_1395|GeneMark.hmm|411\_aa|+|2987|4222 >NVVL01000060.1 Rickettsiales bacterium isolate NORP64 Contig\_source1382A\_23925, whole genome shotgun sequence MNFLDEFKRGYFYQCTNEEKLKKKTENQKITAYIGFDCTAKSLHVGNLQMIMILRLLQ

HGHKPIVLIGGATTKIGDPTGKEEARKYLSDEDINANIAGIKKSLSKFIRFGTGESDAII  
LNNSQWLESGLYIEFLRDMGKMFVNRMLTMDSVRLRLEREQSLTFLEFNMYMLLQAYDFY  
HLNKEYNCDLQLGGSDQWGNIVTGVDLVRKVSSNESFGLTTPLLTTASGVKMGKSIGGAV  
WINEEQSPYDYYQYWRNTEADADVVKFSKLYCEFSDAEDEFENLAKDNINEAKKRLAYV  
VTALCHGEDKADSAMETAIRVFENGTGDDLPTITIDEARLASGVACYDLFLEVGLTKSK  
GESRRIRGKGAKINGEPVLEDEFVDMSSMQEGVIKLSAGKKKHAIVKII

>gene\_1396|GeneMark.hmm|342\_aa|+|4235|5263 >NVVL01000060.1 Rickettsiales  
bacterium isolate NORP64 Contig\_source1382A\_23925, whole genome shotgun sequence  
MKLSDFDFDLPRELIAQIPSEKRDCSDLLIPGEGGNKIVKFFNLVDCLSDGDLLVFNDSR  
VVNAKLSLQKGSKAINVNLNKP SGKNSWLGF AKPSKKLEEGDEF AFGPHKLVISQKLEYG  
EIEIEFRLDNISIFEFLDQYGEVPLPQYIKRPDANKEDLERYQTIYSKSGSVAAPTAGL  
HFTEELLEKIKAKGADLTFVTLHV GAGTFLPVKTENIHEHKMHSEWCEVSPDAAAKINLA  
KKEGRRVIVGTTAMRTVESCAVGG LVRSGVMETDIFITPGYEFQIADLLITNFHLPKST  
LFMLICAFAGHQKMQLY EYAINNKMRFFSYGDGMIIIEKTNI

>gene\_1397|GeneMark.hmm|428\_aa|+|5284|6570 >NVVL01000060.1 Rickettsiales  
bacterium isolate NORP64 Contig\_source1382A\_23925, whole genome shotgun sequence  
MSKKTISSKDPEFNDSIEEQFEILTSEAEAEVEAAAKALDNP GSSDASGESGEGSND  
ASDASDEWDAEIAEAELEAEISQNAANIPGKGSVSNSPSADKEEQTSKEAQIEDEHPAR  
EEAAGSLRSNSHDTHNIEEARLANLPPAQASKQQAQKQTEPPLPEKEEEKKPGFIDRLVK  
SFMDGLEWVKSLSLTKEVHLNEGEGMP SKDGGSKKPGTTAAHQNSEKSLAERASSLEG  
VIEQRGTAINQRRETIAGLVGDRQQNEKQGRKKDRQFIEERPKD TDGVKRMVSRQLRHQR  
QADLEIKKLQNLQRLEEKIQESLRQQQLQIAGLLEDEEKRNLRHKLEQGAASPALASA  
SASPENAPRANAPRANAPRANAPRASARRVNISTQRKPMPTPHVPPSAPPKAQPTGRSI  
AGDNLRKK

>gene\_1398|GeneMark.hmm|697\_aa|+|6752|8845 >NVVL01000060.1 Rickettsiales  
bacterium isolate NORP64 Contig\_source1382A\_23925, whole genome shotgun sequence  
MSRIATPEQRASYLESFLQGLHGSDKIANLSRKDLYELLHAMKQHGV EEEKSWLEAAQ  
INVYTLYGQRQEDNRIEPIHVLLKAAIHAGK LKDTIECFGM DLRNPD DLFVLGQMVPCVE  
SWLKR VQTRLAALDIKSLKQAIKNFSSDLTQENLANVLEIMSSDARDARDANQMTVKTFL  
NFYNTFMLQEAMKAGNLLDTAEIIGGESVSDWDGELLFMLAE EAIKTGRTEELANLWGEV  
DTNSLYDDGEGLLVAAIQAEADLEAVIQNLGIDVNQLITLRVCSILEEWVRDSNDNGYGRQ  
VWAREIGDIGDFRTLPP ELVQEV LNAKEVTKEQANTILGALGKSSEVAYNCLVHHILLAS  
AAQGSLEADLAVLRVCGFPIEVGEFSDHQRLALLGSTRPDQLEDIARLLDIYLNTPGPPT  
QVFILGTAIVNRDLETALNKEFITIKPSEISPDHLRELLVLAVRAKCL ETAAGVLEENYL  
ETAAGLLGQDLTALDSETQISVLGRAIKVKNLDLLSLFGRE DVSDLGSKAISSFLHRAVS  
SNVFYDIIRKWDINLLET FQGSIGDIYDNRLYTHHLAVGRILSAIPLHEFPQIEPGLLR Y  
VFPDDKHFM LVAREIEYRGELKTKAMYELLEPLDWMPFDLFRLLGNFLYRTKDNMNTSSL  
DVEILDAAGAVALDE DGDPTFETISRIAGDLSVDVLA

>gene\_1399|GeneMark.hmm|125\_aa|-|9014|9391 >NVVL01000060.1 Rickettsiales  
bacterium isolate NORP64 Contig\_source1382A\_23925, whole genome shotgun sequence  
VRKIMNTQHLEIINISIMNEAKELMGDRFVTMVEYFIEDSEGYLAEIEAGIKAKDEQALI  
PPSHTVKSSAKQIGAERVSEVAKNIESFCREFDKSDPSSFLKLEDLAWQLKEELSMSNNE  
FKKLL

>gene\_1400|GeneMark.hmm|1090\_aa|-|9393|12665 >NVVL01000060.1 Rickettsiales bacterium isolate NORP64 Contig\_source1382A\_23925, whole genome shotgun sequence  
LVSYMSRKLHIAIFLAYIIPGKLGFLALPPDSSTAIWPSSGFASAGIVILGYAALPG  
VFLGAFFLNLTTHLPILEVFSSEMFQYAPKASLISLGAMSESAVAYIIRFIGFPSIIS  
HWRDVLILFIGAGFIGTIPSPTIGVTTLYFFKTIPLSSYVYTWWTWWIGNSLGVIAITPI  
LVTMFSPSTYISNRRKLYIAIPLTTVLIIVSLAFLDTSKYEVEKLQHNLELEAKNSTLRL  
KSHVYKHFKESTLKSFYKASKFVSRSDFREFIEDIIDSCNGVYSVDWVVPKVAFKDKSKI  
INRAVNDGIKDFSKEYDANGALKPAGKRSVYYPILYSESEKHSNPLGFDVFSNPKLKE  
LSIAIDTGKEVSTDLENKIDNGQSIKIFSIFKPIYINGSKTDTIENRRKNIKGFISGTFK  
RGYLLDRYIKDLKSKGIEIVFDVTKSLSGKSLDREGDTESKRNLERDLKKNPEKIDNKT  
ILYESFSGKSKFLLSTQICMKFADKTWEINFQQTCKYLVANKEWHLWYLLFAGLIFEALT  
GILTIIITGYSDTIENLVRKKTSDLKISERFQLAVKGRDGIWDWVDTSNDEQYWSPQF  
FKLLGYEADEIPPKRSTFKTMIHENDLKAMQRALSDHINNGQQFDIEHRMQRKSGKYGWF  
QSRGLLTIDPLTGIKRMTGSLSDISDRKNTKELKQAKEEAESATRMKSDFLATMSHEIR  
TPMNGIIGITELILDNTLQQQRGYLDNVLNSAETLLEILNDILDFSKIEAGQMDLERVP  
FNLQEASQEVIDLLRPAQKQKLEINLDFDKSVHKYFVGDSMRIRQILHNLVGNAIKFT  
KGSIDITVSKQDSASLPKNKAMMMISVQDSGIGLTKEQRRTIFNKVQADSSTTRKFGGT  
GLGLSICQMLVTMLEGEIGVESTDGKGSTFSFTMLLDSTTKESVAEKKMDNSVEQFNHNI  
TSTVRVMAEDNRINAFAKEMLEKIRCEVTVVRNGQEAFAEQVQKNREFDLIFMDCQMPI  
MDGFEATKKICEYEKAESLEHIPIIALTANAMKGDREKCIAGMDDYLSKPVRQKNFASM  
VGKWFNKSIIK

>gene\_1401|GeneMark.hmm|308\_aa|-|12659|13585 >NVVL01000060.1 Rickettsiales bacterium isolate NORP64 Contig\_source1382A\_23925, whole genome shotgun sequence  
MIQKNKTSPLVLVDDDKVMLMTLEEKVKQKCRVLTATNGKEACEILTNTNEPINAILL  
DRMMPVMDGMEVIEWLWLGKQTNIEKPPIMVTGADSPEQIKEGIDAGVFYLLTKPVQTQVL  
KSVLASAVEESIQQHALKNELKRHRISFKLMEKGLFYIQTLEEAENISCFLANCFPDSEK  
ALPAIAELVINALEHGNGLITYDEKTTLIQNGTWRQEVARTNLPQNKDKKIKLLFEKKG  
SEYLLKILDQGTGFEWSKFLKVNPARATDNHGTGIARANMIFSKLLYSDKGNQVTAIIDT  
KNEKNINW

>gene\_1402|GeneMark.hmm|454\_aa|-|13605|14969 >NVVL01000060.1 Rickettsiales bacterium isolate NORP64 Contig\_source1382A\_23925, whole genome shotgun sequence  
MLKPLIRFLSGKSKSYSKINQLRYLSQSALIEETKAPYMTRVTLVLVSVFVILLIHWAGI  
TEVKEVAVTQGEVLPRIHQRIQHLEGGVISKINAKEGELVKKGDTILVLDGASIKQDLS  
ALRTKKISLEYQSLRLKSFISNTRPNFKKIVGYDHDSELEEEQIQAFDGMIEARDTEKKV  
LTDQITQKKETLTSLMNRKMTLTKNIKLVKEERDLKQKLHKKGHLSKFKFLAAQKHFNDI  
IGRLKKTESDIAQAKNMVSEYKNRVESLEARLIDDAHDELSQVEGDISQLDENITKFEQR  
ITRLVIKSPSYGIKVLNIKTIGGVIETGEVLAIEVPLRGGLVVEVRINPKDAGHIQTGQ  
AVNVKISSYDFSRGTLDGKLEYISATTFADDGSRYYTGRVSIKNIYIGSNPKRNIIP  
GMTAQADIVTGSKSILYLLKPIAVSIQTSFSER

>gene\_1403|GeneMark.hmm|744\_aa|-|14970|17204 >NVVL01000060.1 Rickettsiales bacterium isolate NORP64 Contig\_source1382A\_23925, whole genome shotgun sequence  
MKGNTAGNMKENTISMADTGSDDIIDRVNDILEMFNTHEVMPDDSKCDHVFAKALSMLM  
VSLKWSGNKRHLFESLSHTKGREIDLLDILNSVANLGYTSHEITISMSEIDDRMLPCLFI

PAKRTNSPLVLLSKNEGIITAFDSRDKKIIEFAAGREKGEYFFERINQEDLDEERKTQE  
LAGMSWFDIIFSRNLPVVKEIILASFFINIFALAMPLFIMSIYDKVIGAGAITLVYLAF  
GVSIAMISEFTLRIIRSKSVVWLGVRDNIISNAIFERLLFMKAAYTEGASVSSQISRVK  
SFESIRKFFTPAFSVIVEIPFTIILLMAIWLIAGPLVYIPIVAVFLFILMLLYYQSKIR  
VSMQAAAKASGECQRYGMETFMKINYLHHNGIANSWLQQYKEKLSKASMASFRSNITSSI  
IESVAHSVTIASGLAVVTFGVHLIWAGEMSMGALVATMILIWRILGPKTLCSMLPRIEQ  
LRDSIRQINRLTNIETERSSTILKRPIEHLNGDIKLTNVGIRYSMDAEPLFVGLDLDIKA  
GEIIAITGTNGSGKSSLLKLINGLYRPQTGTVRIDGTNILQMEPIELRNYIAYLPQIPNF  
FHGSIKDNILLVNPLATEEDVVLALEKSGAMEMIKNLTHGIHTIIRANNPTLPNTFGYTL  
NLARVFLKSGNILLDELPNSSLNEKVGKAYQLIIDSRGKKTVFFASQRDDFLKLADKV  
ILFKPGRNPVTLKSNEFINKYGQD

>gene\_1404|GeneMark.hmm|566\_aa|-|17201|18901 >NVVL01000060.1 Rickettsiales  
bacterium isolate NORP64 Contig\_source1382A\_23925, whole genome shotgun sequence  
MNLIDKYNLNDPACKFRLNKPSELIVSSLAVNLISLALPVMVLQVYDRVLSNNSIETLSML  
TFGVFVAIILEGILRIARAYTTSWTGMMYEYTM SANAMRYYINADPAKLRKEGVGKQIQN  
LTTFSKLRDFYGGQTLVTMVDIPFAFIFLGLIMYLTGKLVLIPIILILIFGYVTWLTGNK  
LMDSMQQLDADDDKRYDFIIEALQGIHSIKSYGIESIFKRRYERMKEDSSRSNYKTALIS  
TQGYNLGSLFNETMIVAVVAFGAPMVMNEMSSGALIATVLLSGKLVQPIQKALFLWSGF  
QDYRIATQKAEEIFSMHQIKRWGGELENEKIGLVELKDLGFTHGTSVFSGLNLKVKLPE  
AIAIHGAIYSKTTLM SLIAGIFEPGEGEILVDNMPASSIPSAKLVHHVGFISPESVMFH  
GTIMDNLTAFNEAKEADAIELAKLLGIDNEIALLPQGYETKINDGHTDTIPPGIKQRIAI  
IRVLINKPKVILFNNADKGLDRDGYNCLVSFLSLLKGVAMIIVTEDKNINRLADKHFL  
KDGSLSIEIVKDSNIFNVKPYKELKI

>gene\_1405|GeneMark.hmm|1773\_aa|-|19058|24379 >NVVL01000060.1 Rickettsiales  
bacterium isolate NORP64 Contig\_source1382A\_23925, whole genome shotgun sequence  
MADSKSGETGNNSEASHSQEQFDRFDRLTNVDKDL DARKMTAHEKASTLDFEELVTS  
DITSSTEELTYPPEKTEILDGAVDSRDRTQHSPDELMINAQFEYNDDSSYNPPPETPI  
ATFIEEDALPKEASGEIIEPSFHNAQKTEIAAGQKDANEDIIDQNEASKEQTGSEEAANK  
KDIREIEDELLIQRNEEEVTEDEVPGDPPPAPATPPPPIPDPTNPDPTPDPTDPTDPTDPT  
PDPDPTNPDPPDPPEPLDPPIDQLGNGNYNIIPGYGISLVFDSLTSNTGYDNSFGHY  
FVDGDGNPISGAIDFSNVGDTLGESEVIVRYESSDIPAGAEQIGFFLIPDGANLNQLSA  
GDVVFQNIIGGIWTPFINGDPIQGESTPIYFSDQSLNPDGINHMNSSPDGKVGWEDMFGG  
GDNDFNDAILNITVQSTTDNNGSDDIITGTAGEDVASGGKGD DILIGGAGNDLLRGGANN  
DILIGNKGGDDTLGGAGNDILKGDKGS DTLKGGKGGDDLFGGSGADILKGGAGDDMLFGG  
SGADTLKGGGGADTLKGGSGDDNLFGGAGDDTLLGGGGADTLKGGAGDDNLFGGAGDDTL  
LGGGGADV LKGGGGADTLKGGAGDDNLFGGSGDDTLLGGGGADTLKGGGGADTLKGGAGD  
DNLFGGSGKDILFGGSGADV LKGGGGADTIKGGAGNDILYGDQKSNNDTEL VQLPNGNYL  
IPFGVGF TISLDSIISHAGYNN SIGHYFANSNGDP IAGMIDFANVKDTLGVGEP SVSVYA  
PENLPSGVVEVGF FLIPNGDR LNHQISDGEVTF TLNNQGEWTPVLDGTELKGGQDPVFF  
SDSALNVNGFDYTEIIDQNPLQIGFEDLKG GGDNDFN DVVNVVDIKQNSTPEDDILIGGK  
GDDILFGGAGIDTAIFKGNADDYIITHNKDGSITVEDTVPDRDGTDIVHDVEKLEFKD TT  
IDVDDIDPPAPPPPPPLPDPSFSGTSDEYIFTSNGDGTFTASDTVPARDGDQTFQGGAD  
LDFTDKYTTTTNDTIIGTDGDDVMRGGAGDEIFKGGKGNNDNISGGAGNDTILGGKGGDDTI  
DGGDGADIIYSGDGD DIVDAGAGDDIVIGGLGNDNIQGGAGNDVINAGSGDDIVDGGIGD  
DSIAGGAGADTIDGGDGDWISGGDGNDAIAGK GADV VFGNKGGDDNISGNEGADTIYGN

EGTDIIDGGADNDTLHGGDGNIIIDGGDGDLLIVGDYGYQDPQLLPNGNYGVPEEGLH  
ISIDSIYSTTTGSNNSLGYFADENGEPISGHVAFADSKDSLWAGDPFTIDYNSDIPAG  
ATQIGLFIIPDGETENPTLTDGSAITFQNIAGQWTPMLGGAALKGDQGVPAFFSDSNINV  
AGFDYTNNSYDGTTRISFEDFLGGGDNDNFNDVVADISIKTLYNGPDNNDTLTGGAGNDTIL  
GGAGDDNISGGDGDHGGIGDNIAGNDGDDWIESGSGADNITGGLGADTIQSNAGDD  
IIDSGDGNKVFVGAGADDIKGGAGDDYISAGSGDDTVDAGDGNDIVLGNTGTNTLSGGK  
GHDYLVSGDGDSTLFGNEGDDHLYGGSSNNTLIGGEGDDVIVSSGKSGTFNALFGDEGD  
DILKASDGSNFFDGGTGNDIAIFEGAYSEYIITDFVGDIVVTDTVADRNGDNTLTSVET  
LQFSDGTVLASDIAGNPIVPNGLIVADVTDDWTD AISKDPNFVATDPGTWVEDLNLKSH  
DHENDYDDL DENELDNNDIPDDGDLDPNDPPPI

>gene\_1406|GeneMark.hmm|292\_aa|-|24496|25374 >NVVL01000060.1 Rickettsiales  
bacterium isolate NORP64 Contig\_source1382A\_23925, whole genome shotgun sequence  
MTTIVSNTVSIKTLTLHLRMSLSASFYKDVITSYKGYGVKYILTSLIGSLFSTMFFL  
GDVNTLQTYLEDSKIEQKIENIDHILTQMPTLDYDGKNISTKKNTPIFLLDKKKNKIVAI  
DPNGKLPSESAKIPVLMTGNKIVITLIHSDQAIRNSWPLQYTQIFGKEPQILTQEVIKS  
NFASLLEKSSSVFIYMFVPIAAILLFINTILEKSFFILVIYFITRAIAPQFSMQACIRTV  
LFASGSAVLIQPVLLLAIPTLSWLLGILQIWANLLMVLGILKASGRSRFSLK

>gene\_1407|GeneMark.hmm|175\_aa|+|108|635 >NVVL01000061.1 Rickettsiales  
bacterium isolate NORP64 Contig\_source1382A\_23964, whole genome shotgun sequence  
VEKGYVSSEFIVKSGRKKNATITGYASVFGVDFHNDIIVKGAFKKAKANKIRLLWQHES  
KKPIGVITLLEEDYGLKMEAEINSNTVAGAEAAELVRQKAICGLSIGFVISSNYNKEG  
IRVIDGINLMEVSIVTFPANRSAEIQAIKNRDKEKGSYEESLDTLQGLIKKENY

>gene\_1408|GeneMark.hmm|353\_aa|+|685|1746 >NVVL01000061.1 Rickettsiales  
bacterium isolate NORP64 Contig\_source1382A\_23964, whole genome shotgun sequence  
MEENKIEEMSEDLKSFLARESNTGVKINKIEGDISKMQNYFLNDNINNNPEEKAAFNSFI  
REGVGSDFINKSFGGAQEGGVLITPTLNNQIISAINAKSPMRQLASIESISTRALDIVI  
EDGAFISGWVAESAARPDTNTPNLTKKTINAHELYAQP KATQSIIDDSEINIENWLSERL  
VDSFVKLENEAFINGDGNNKPFGLLANAGIGRIDVEHEVSPASLLNLINGVGEYLENAS  
FLMNRSTLSSIQSLTDEAGRFIWQQSLSDPLKQTIFGVPVVISSNMPDIADNSLSIAIGD  
FRSAYKIVDRSGMNLMRDPYTDKPFVKFYAVKRVGGDVVNPSAVKFARFAAAA

>gene\_1409|GeneMark.hmm|175\_aa|+|1832|2359 >NVVL01000061.1 Rickettsiales  
bacterium isolate NORP64 Contig\_source1382A\_23964, whole genome shotgun sequence  
MIMIVNHKILNIRNIETWPLEEVKNYLRTSDYDDVLLIGLVETATNIAESFTGLSLHNR  
HILCEIKNAKPIIKLKHVPVLRRLTGVR LASKDEKEDISDDFGFVETSNSTLHLASHYAGK  
DVEIEYESGYEEHIPREIQHGILMHVASMIEHSEDGTSINSEIKDLYLPYRVMKI

>gene\_1410|GeneMark.hmm|109\_aa|+|2376|2705 >NVVL01000061.1 Rickettsiales  
bacterium isolate NORP64 Contig\_source1382A\_23964, whole genome shotgun sequence  
MKQNIISKLSHRIIFLENRAASELEEDLWEEVQTSFAEMKPCDNRFVSLEGLQFGNVIT  
EGYFLFRIRSIKDVHSRMRINFQGR LFEIKRIIDEDEKGRMLSIVALEI

>gene\_1411|GeneMark.hmm|140\_aa|+|2723|3145 >NVVL01000061.1 Rickettsiales  
bacterium isolate NORP64 Contig\_source1382A\_23964, whole genome shotgun sequence  
MSLTFIHDFQKQLYSALSADAWITNNINKIYFGVVQDQGQSPFILINIQAEDLSLHHNSI  
YSVDFQIIGYAKDHNHQLLVSLGDRVVELLSNSERCFGGYIIAGIKANDVQFERARDLVL  
NKLTINYKALIKKEVYDELS

>gene\_1412|GeneMark.hmm|198\_aa|+|3132|3728 >NVVL01000061.1 Rickettsiales  
bacterium isolate NORP64 Contig\_source1382A\_23964, whole genome shotgun sequence  
MSFHVNLPRIHVEFAIGSSEFSTSCAVSMSGREVRS LDAASPKRRYTLKDCRLSALQFE  
AFNSFFKARGRRFSRLRDHFDYIAARQIIAIGDGS AIEFQLQKTYEDKVNPPYVRTITK  
PIAASVNLWSDMEDIIPNSIDANTGIVRLAQPLAGGASLSASFEFDVPVRFACDEFQYSL  
SKDGSIIINDVELIEVYE

>gene\_1413|GeneMark.hmm|260\_aa|+|3728|4510 >NVVL01000061.1 Rickettsiales  
bacterium isolate NORP64 Contig\_source1382A\_23964, whole genome shotgun sequence  
MGENFVYLFYIKTSRNKEYYLTSSEVVVSAGVKYQPYSGLALTSKGFNDSGQNQVILSG  
IFEKQIDKDDDLTGALVKIMYMQGDKGDKGNKDDKAIHFVSYICTQHSMKMDLDFEIKCE  
PETIKYNQPVVQMFSKTCRANFGDDKCKVDMGDYSVLCVVKVKNILTCELGDVKSGYF  
KCGKLVTLGGEVESCFSKIMSHSGNDIEVERGCNFDFAEQKQVTLIPGCDKSFRTCCYSF  
KNAVNFRGEPAPIEFNFIKN

>gene\_1414|GeneMark.hmm|43\_aa|+|4561|4692 >NVVL01000061.1 Rickettsiales  
bacterium isolate NORP64 Contig\_source1382A\_23964, whole genome shotgun sequence  
VFRFGAVSVPQTDQLQDSA EYFCRVEKDTLSAYEKL VKEYERK

>gene\_1415|GeneMark.hmm|168\_aa|+|4679|5185 >NVVL01000061.1 Rickettsiales  
bacterium isolate NORP64 Contig\_source1382A\_23964, whole genome shotgun sequence  
MKESKFFENNRLNKG YGRAPSNRVSDSALVNKKYNHALPPIDMME EYEEMNPGSCAQLF  
SMAKQEQNHRHSM DLVAMNRHNKAVHMGRMFSLLFVMIVA ASTFALAFFGNVIVASVFAG  
SAFACIVMVS YFYSKNTVNTVKREFNRPQQRNHRPSKGRGQRNNRPSR

>gene\_1416|GeneMark.hmm|259\_aa|-|5189|5968 >NVVL01000061.1 Rickettsiales  
bacterium isolate NORP64 Contig\_source1382A\_23964, whole genome shotgun sequence  
MKNKVVVVTGSTSGIGLGI AKRFSKSGAHLVINGFADSGEIKKISEELMADGAAGVIHEG  
ADLTKPAEIDQM FANILDKFGKIDVLINNAGIQFVSPIEFPPEKWEAIIRIDLIASFYT  
IKNVVPIMKKNGWGRIINIASAHGLVASPFKSAYVA AKHGMLGLTKTVALEVAEHGITVN  
SICPGYVKTPLVLEQVADTAKARGISEESVIKDVLLAAQATKKFVEIEEIASLAHYLCSK  
EAASITGTALSMDGGWTSQ

>gene\_1417|GeneMark.hmm|105\_aa|+|6408|6725 >NVVL01000061.1 Rickettsiales  
bacterium isolate NORP64 Contig\_source1382A\_23964, whole genome shotgun sequence  
MIKTKEIH FITTENGKCPVKEWLKLDIQTRARINVRLVRLEYGVYGDCKRIDKQLYELR  
FFFGKGYRVYF TERDNKIILLLSAGDKSTQIKDINKAKDILKELS

>gene\_1418|GeneMark.hmm|98\_aa|+|6737|7033 >NVVL01000061.1 Rickettsiales  
bacterium isolate NORP64 Contig\_source1382A\_23964, whole genome shotgun sequence  
MEKFNDYLTQLQDQDEL VAYINAAL EQYSIDQNKELFLAAIKEAIIARGGVTKVAIQAH

INRQHYYRMLSSKGNPSFDNIGILLSVLGTRLMVEARA

>gene\_1419|GeneMark.hmm|64\_aa|-|7092|7286 >NVVL01000061.1 Rickettsiales  
bacterium isolate NORP64 Contig\_source1382A\_23964, whole genome shotgun sequence  
VVYEESIANHAAGAFVAILEGLDVGNGKHHGKQRFKSVISVFIIAISYILYYPINDRM  
NNYN

>gene\_1420|GeneMark.hmm|510\_aa|-|7666|9198 >NVVL01000061.1 Rickettsiales  
bacterium isolate NORP64 Contig\_source1382A\_23964, whole genome shotgun sequence  
MSSSRSTRVNAKHLLSGDFSRNEGDWVRTQTWLRVFKILLQEDNLNTISEIDSTELKSLV  
STHGVLGDSDFKGRQGRQEKTSAQDSFKQVITLLTRSINEETINSAKVSEFLKLFEGT  
PLEEYVISSANTLTKAKCTEHARPYSRAFEALDLESTGLFKMLSAFNPFSSFVDTSIIP  
RNLFKMWVTPKTPDYDTIMSILSNTQETTIQNLKGDQVETKSIATLVATLNDTDTDELD  
FGSASETSESTESVSSDLDTSTFTVSRSTVDLEVKSHTPGTLSDERIFSACTTGDIKT  
VSTMLNGGYDVNSHETYDRPPLLLAVSVSDPNLALVSLLDKADVTARSTDDKGVLEHI  
QEDSLDMHPGATKDIIAKIASKFLDMGRIGQFVDELPSYLIDAQLNLWINALPEKVTQAI  
KSIKYSLHQDKLTSLQEALPLATSEEVPIELPLAEDLSQVDLLSLSLHDLFRKFLQDNPS  
VLGLTAGELAGTFSEEHSTMGDSLDPHPAD

>gene\_1421|GeneMark.hmm|75\_aa|-|9195|9422 >NVVL01000061.1 Rickettsiales  
bacterium isolate NORP64 Contig\_source1382A\_23964, whole genome shotgun sequence  
VIRKDVTYLQCCLIKIRKLFVFLGNVNIFVIESARRREALSAKTIRFMPLVSAKNERSL  
MCDKCLLIKYRMML

>gene\_1422|GeneMark.hmm|360\_aa|+|9550|10632 >NVVL01000061.1 Rickettsiales  
bacterium isolate NORP64 Contig\_source1382A\_23964, whole genome shotgun sequence  
MSIDRKTIVVAMSGGVDSSVVAAMLHKAGHKVIGITLQLYDYGEALQKKGACCAGQDIYD  
AKMVADKLGFPHYIFDYESKFKEEVIDDFVDSYLRGETPLPCVRCNQSVKFKDLLRAAKE  
LNADALATGHYVQKIVNNGMSELHKGVLLEEKDQSYFLFSTTQEQLDYLMFPLGGYSKDKT  
RELAREFGLEIADKPDSDICFVPNGNYRDIIDKARPDAMKPGRFMHIDGFDLGGHKGIA  
GYTVGQRKGLGIAFGKPIYVIKIDPQTNTVYVGAESALFKTKFLLKDINWIARDKNPEGL  
EIIAKIRSTTPGVLARLNYKDGQLQVTLLEREKAVTPGQACVFDGSRVLDGGGWITREIE

>gene\_1423|GeneMark.hmm|471\_aa|+|10732|12147 >NVVL01000061.1 Rickettsiales  
bacterium isolate NORP64 Contig\_source1382A\_23964, whole genome shotgun sequence  
MKFFKKKSFESVKDAGGTSGLDRTLDLILLGLGGIVGTGVFALTGMVAAQYAGPAVT  
ISYIIAGVTCIFVALVYTELATMLPTSGSVYTYSYVAFGEMVAWLVGSAIIELCFSASA  
VAGSWSAYVQGFESAGAPLPKMLTNSPFEGGIVNLPAFLIVFVGCMLYRGTKESKLN  
NILVFIKMAAIFIFFAAPHFDAANWENFMPNGFDDVLYGSSILFFAFTGFGTLASAAE  
ECKDPKRNLTIIGSLVLATIVYVVVAVLTGIVPFGDLDNAQPLAYALKQTGNGIGST  
LVATGAVAGMTTIVIMMNIYQSRIFYVIARDGLLPKSLAKLHHKYDSPYMTILVFTTLIA  
VMGALIPYGILAQSSMGALVDYMMVAVVMMFRIQKPDVERPFKCPVFIAPLALMAS  
FYLLFKQIISKHGEMLLTGKIFIYWFIIIMFVLYVMKSSLFSAKEQIDNAAD

>gene\_1424|GeneMark.hmm|450\_aa|+|12243|13595 >NVVL01000061.1 Rickettsiales  
bacterium isolate NORP64 Contig\_source1382A\_23964, whole genome shotgun sequence  
LYFKIKPIQVKLMSVMDSTFNAVIFLEDFFWAYIGWALIVSAGIYLTII SRGLQFRVLFN



FRSNIKNIYCEASKSKNGGVHPFKLYFASVGGMVGLGNIVIISMAMVIGGPGSIFWTVLA  
SFSGMLLKYEIYLGVKYRVQNPNGGFNGGPMYFLQKAFKPKIFAYIFAFLMCLYGVEVS  
NFLIIVDRMEHSFEFNRYAVIFALLAVTIYSAIGGIERLANICTAIMPVFMIGYVILAIY  
IIFINASLLPEFFKTVIVSAFTPHAQIGGFAGSSVILAAQLGISKAVYSGDIGIGYDSII  
QSETRIVNPHDQATLAIYALFTDTFICLLTNVMIGVTGAWYTLNHLVPSDIVSKILSEYI  
PYSDVFM TLLFFAGFTTIIAYLAAGIKCEFISQKYGKMIYLSYAIFAFIFVCNFSQTN  
AIIIMSLLAGLLVLLNICGILRLRKDIEFK

>gene\_1425|GeneMark.hmm|429\_aa|+|13636|14925 >NVVL01000061.1 Rickettsiales  
bacterium isolate NORP64 Contig\_source1382A\_23964, whole genome shotgun sequence  
MKDLLPDDFRIHKHIEEIAFNTAKLYGYEGFATPMLEYVSVFDRTLGEEESDVVSKEMYSF  
HDKKGRHIALRPEFTASVMRAFISNGLKQKLPKLFSSGALFRYDRPQKGRQRQFHQLNF  
EYLGASGAYSDAETIALAAHVLENLGLLADVTELENSLGCRESKQNYQAALSAYFAQYVG  
ELSEDSKKRLEKNPILILDSKDESDKIAKDAPVITDYYTKDAASYFQEVRSNLDMLGVS  
YVVPRLARGLDYSSHTAFEFVTTSLGAQSTVLAGGRYDGLSELMGGDKMPAIGFAAGIE  
RIALMGEFSPAERRVYVIPIGAECADYASRVTNILRRGGVQTSLSFEGKIAKRMQSALA  
ADASFVFIGSEEKAKGTYKLDLDAGSEIEVNSAEELLEITQQQVVQQQIARQQIARQQV  
APQKTRQGGQ

>gene\_1426|GeneMark.hmm|333\_aa|+|14988|15989 >NVVL01000061.1 Rickettsiales  
bacterium isolate NORP64 Contig\_source1382A\_23964, whole genome shotgun sequence  
VDYSDALALCGDEVINISSIGAKINSRHRKYSPLNAPWCVFSKLYLKILTILLKPDII  
ICHGNRAISFASEFRFGIFDKNIPIVGVAHNYSYKHLKKCDYVIALTENLQEHLVARGIA  
SKQILRIPNMARVGREYKQKEFSSPAAGSPEAGLPVVIGSFGRFVAKKGFVYLIEAINIL  
KQNGHDVRLVLGGSGQDREMLKEKQELKLEGEVSIEGWVTDKDAFFQQMDIFCLPSVVE  
PFGIILLEAMEHSKPIIATKSGGPEEVIRDNVGDGLLARVESSEDLARKIEQLIMDQDLAH  
RLARSGYLRLKENYDINIVAKNLSNSLNRLIKK

>gene\_1427|GeneMark.hmm|425\_aa|+|15986|17263 >NVVL01000061.1 Rickettsiales  
bacterium isolate NORP64 Contig\_source1382A\_23964, whole genome shotgun sequence  
MSFNSSKLPNGLDVVTYSMEQVNSVAINIIVNVGSRVETEEEAGISHFLEHMAFKGTTNR  
TALEIAKEFDAIGGQFNAYTSREHTVYCTKVLSQHTDQALDMLSDILQNSLFEEGDIKKE  
LGVILQEIAGVNDSPDDLVIYERFYLAYPNQPIGKSIKGTGENIAKFDKNAFQKYMAQHY  
RPDNIVISMAGKVTHEEAQAQVSKFFSNMGSSKQEPHMQTSHPLAQYVGGYHFTPKELEQ  
TTIALGFSSVSYADLKLIFYHAQILSIILGGGLSSRLFQRVREELGLAYSIGSWVNAFADS  
GTFSISAAADHNNIAVLLENIVIEVNKIKTDISEEELKAKAQIETNIYMAEERSEYKSE  
EVGKNFALFRKYSPIEEVM DIVLSTTTDDLHAMAAEIFASNPTLSIVGAPQKDVSNFNIQ  
DKLLK

>gene\_1428|GeneMark.hmm|212\_aa|+|17330|17968 >NVVL01000061.1 Rickettsiales  
bacterium isolate NORP64 Contig\_source1382A\_23964, whole genome shotgun sequence  
MFSKDKHKMLNLCILASESLEKIGQKRKNGKTKIAELMEDFYENGILLAMIFFSLPVAIPL  
PYPPGFTTIMGVPLVILSIQLLIGSKKVLRLPEKINNYEMKNATLKTISKIVPIIKYVEK  
YVKPRFEFAKSVYCEQFVGFVCLIAAIAVALPIPFTNAIPALGVTIMSLGLLNRDGLVII  
AGFVITVVGVVIAISIAVSVAVQYLFHMIF

>gene\_1429|GeneMark.hmm|236\_aa|+|17991|18701 >NVVL01000061.1 Rickettsiales bacterium isolate NORP64 Contig\_source1382A\_23964, whole genome shotgun sequence  
MQKDLIYKGSTKSLYHHEKEHMLKMSFEDTLKTSADLIEIPGKGIINNSISSYIMQQLD  
LIGVATHFVKKENMRQQTIQHTDIYPIQIHIATVASGRYVTDGMEPGLIFETPLIDFRV  
KNKKIGYPPVNESQIMHFGWLYKEEIEDLKTRAMRVHDFLYGLFAGVQIRMIDVKLEFGR  
VYDEENFMIMLADEISPDTCRLWDMNSNEKLSYEIAEEDPEKILPAYQEVLRRLLEG

>gene\_1430|GeneMark.hmm|704\_aa|-|18753|20867 >NVVL01000061.1 Rickettsiales bacterium isolate NORP64 Contig\_source1382A\_23964, whole genome shotgun sequence  
MSSKLTIFTLKDIRDMPESRVVIILNDQVYDVTDYLVCHPGGREVLENRKRKDATEAFSA  
IGHSDRAEEILKEYKIGSLAEKERSGGPPLQSNALSSSPEPLKRVMHKIKLVTEEDPYF  
FHKIFGLIVLLHMAIRFIVLGLDAGEVIIQRDIIGFNSDNVFSDBGTKLFFAFCHGILSVS  
SFIFAVPKHSSQNKPMIHQMFRGHVCFASRAVLCMVVDVVLVQSPELKRFLISCIVLSCL  
IAADQITKYLATEDDRYKTTNSMPYWRGCSVEREHLHKTFFAFAQFLASIIICLFGSYTTI  
FFTLPAIQGAALLMTLRKNIITSHSYHQIYTFLLFYPIPLFLVLWPAKTIFAIILSGVL  
YYLRSRNINKYLLWIPVLI MANMIELTPENYPNGLIIGAAIFLLTYIVKSNAKIETER  
IDGNRRVSHKQITPDAYELIIRTQTPIKLEIGQHVLIQINDSLNRKYTPIWTKYLPETD  
QTLCLRIKEYKSTERLTASSYLARCGEESVLALHGPYGNKFCPKNDAAIIDKINKCQYN  
LEDYQVYLFSAAGSITPIYQLAKNICKPGQKRGDSKNGGEGKDGKEKGREKGGKNEKLT  
ITCDQKHENQMMKDELTLKEDFPNELDWLCLFSREGKNSPDIPATIFKERLTPGKLMNI  
VKCDSPSLIIICGPKDWQEMIQQTINLIDFDLKDPPPCKVLA

>gene\_1431|GeneMark.hmm|994\_aa|-|21191|24175 >NVVL01000061.1 Rickettsiales bacterium isolate NORP64 Contig\_source1382A\_23964, whole genome shotgun sequence  
MARERKAGISYLEQQKARYNIRINVVKSLYASKLKNPETPDHDLKLSFISILNLTNI  
ASSRKLKAFYSLNLAFPDVIKSLFGLDAKFFSNLNKLTPEEKNSIRDFLYFATDAYISLD  
KKESLFHIAAKFGAASVLESMLRTCSDEKGSINSNNQNFLYNLKLKLYGHNELHQTMLENHP  
ELNELDTHPLLLKSPPEMSPSALDSMNGVAYYYYISIFGLTPEYNCNTRNSYSNKALK  
HLIDYCNAPINTHNPLAITCLLDIYHASKNENLLTVLQSTCSNASDLSQYFIASCIKAI  
QTKDTDYLDKAYKFKSSNSLEAHVIIAVYAVKHGDWTFYKAIRDDVSVEQPFRALQDVD  
NNIARVFAAFNQNQEIIDAESDLEFKAKLKAASVTVQGLCARLVNVDATAALCSQEIPLP  
SAIKKSPQLLIEACKLALALQSTDIDGAIEIFNTVIHVMTRMPGISLRAKVEIFILKGG  
ALQEKSVRILKLWGQVPQSKDIDIDSEVRNTIDNAIMVYDKALNHIWEASGDAQALYNSV  
LEYGVENAYPNELKIKLSELNIFGKFREILYHKFYCYIIQRDSNALICASLLDYSPDEE  
PKLYTLLARKAAGGDPVFAEFLAIDPDTLSPKTKAVYKKIAPILIRCNEKDIADTETSI  
GAMEAELTSVQEELKQTHPEQPTSTQLVQFTHPGKEGRFIKSEVKVRFMNLEDLPYEFFT  
THIKALAGCKAGEVWLWLSRLKSHHRIFQSECQKIQDGRSNVLQKKGVDKLLAEYDSIL  
ENHENRELSALITPKNHNLKEFHKEVQHFTLNLLQIVFGIQAIFLGRNEYARKLLESF  
EANPSQKMLKICIEIGEEDELLTPLEDLLSTSQGLASIPETEILKTRTHHTTKCPYTSN  
FLGIYTDWLDALPSQLAVQTSALPNEEAERTLLQSAAPSSKSPSTVEVFEYFNFVLDVLL  
MPDSDHDVDLYGKPISTHNTGEFVFAEVDTLFFF

>gene\_1432|GeneMark.hmm|185\_aa|-|174|731 >NVVL01000062.1 Rickettsiales bacterium isolate NORP64 Contig\_source1382A\_23967, whole genome shotgun sequence  
MEESQKQELTAKMEKTMAVLDRELKGLRTGRASVNLDPVVVEVYGSKMPLSQMGTVSTP  
DAKTITVQVWDKGMVKTAEKAIADANLGLNPSSDGQLIRMSLPLDEERRKDLVKIAYKC

AENTKIALRSVRRDGM DGLKKMEKANEISKDEHSHHGEEVQKLT DGFIGKVDSL VKSKEQ  
EILTI

>gene\_1433|GeneMark.hmm|239\_aa|-|737|1456 >NVVL01000062.1 Rickettsiales  
bacterium isolate NORP64 Contig\_source1382A\_23967, whole genome shotgun sequence  
MSLTEYKRVLFKVS GEALMGARSFGHDQETLKGISEDIKEVCELGVQVCAVVG GGNIRG  
ADAEILGMERASADYMGMLATVINALALQNALEQSGVYTRIQSAIPMTSICEPFIRRKAR  
RHMQKGRVVI FAAGIGSPFFTTDSAAVLRVEMECDLLKGTNVDGVYDDD PKQNPNAKK  
YDEVTYTDVLRDNLKVM DMAAIAVAREN NLPKIVFSIKKRG NFAKVLQDQGIYTLIKGN

>gene\_1434|GeneMark.hmm|724\_aa|+|1691|3865 >NVVL01000062.1 Rickettsiales  
bacterium isolate NORP64 Contig\_source1382A\_23967, whole genome shotgun sequence  
MPKLTIDDKEIEI EAGATVMQACQQAGIEVPHFCFHDRLKIAGNCRMCLVEMEKSPKPIA  
SCAMPVSEG MNIKTNTPLVKKAREGVM EFLINHP LDCPICDQGGEC DLQDQAFKYGKGS  
NRYTENKRSVKDKNLG PLVKTQMTRCIHCTRCIRFFNDVAGLQEMGAIGRGEHMEVVSYL  
EKSLTSEL SGNVIDLCPVGALTSKPYAFKARSWELTKTNSVDVMDAVGSNIRIDSRGSEV  
MRILPRVNE DINEEWLSDKARFAYDGLKAQRLDVPYVKKNGK LKKASWDSAF AAITQKIL  
NIKGKEIAAIAGSTASSEPMFLLKLLAKLGS DAVDANQFGYSLDVSARGNYLFNTGIAS  
IEKSDLCLLVGANPRQVAPILNARIGKAVRAGTMQIARVGEVDDQTYNIDELGCDAAILT  
EIASGKGSFASLLKAKNP AIIIGD GALVREDGEAILVLVHKIVEKYKIVRSDWNGFNIL  
HNHASMVGALDIGFHYGSNGTADILDKSQKNDVKMLYLLGADDFDIDKIGKDC FVVYQGH  
HGDA AASRADVILPEAAYTEQDGIFVNMEGR PQYAKAAACRLGEAKESWDIILTLARKLD  
VALPAKDLSSVRELMAKEHSVFANMDAVQTVDFTCFKSDQKLLKTPIGRVAINYYMTDPI  
SRASVTMARCTKDLKEGLEAKKVP ELKKDLDSKGLSKDLSSKDLG TKQSPGSKKDL  
EAAL

>gene\_1435|GeneMark.hmm|338\_aa|+|3862|4878 >NVVL01000062.1 Rickettsiales  
bacterium isolate NORP64 Contig\_source1382A\_23967, whole genome shotgun sequence  
MMDLFMDYAF LILIIIAKILLITVPLLLSVAYLTYAERRVIGLMQLRKGP NVVGP MGLLQ  
PIADAVKLMFKETIVPTAANKVVFIMAPMVTFVLSLIGWAVIPFDAGMVLADINVG VLYI  
LAVSALGVYGIIMAGWASN SKYAFLGAVRSSAQMISYEVSMGLVIVTVLLVTGTLNLSEI  
VEYQRTMPFWIQ LLLAPMAVFFISVLAETNRLPFDLPEAEELVAGYNVEYSSMAFALF  
FLGEYANMILVSGITVTF FMGGYLPFFNIGFLNFVPGI IWFILKVEVLLFIFLWLRATLP  
RYRYDQLMRIGWKVFLPFTLFWVVFASILMLTDSLPG

>gene\_1436|GeneMark.hmm|159\_aa|+|4891|5370 >NVVL01000062.1 Rickettsiales  
bacterium isolate NORP64 Contig\_source1382A\_23967, whole genome shotgun sequence  
MIKYIKSFVLYEILVGMAL TLKYLKPKVTINYPYEKSPVSPRFKGEHALRRYDNGEERC  
IACKLCEAICPAQAIVIEAEVRKDGSRRTTRYDIDMTKCIYCGLCQEACPVD AIVEGANF  
EFSTETHQELLYDKNRLLKNGEIWEKELSTKLKDDYLYR

>gene\_1437|GeneMark.hmm|206\_aa|+|5379|5999 >NVVL01000062.1 Rickettsiales  
bacterium isolate NORP64 Contig\_source1382A\_23967, whole genome shotgun sequence  
MAVFFYGF AALLILSSVMVISSRN PVHAVLWLIFAFVNASGLMVLIGAEFLAMMLIIYV  
GAVAVLFLFVMM LDIKFSEFKSATGSEM GISFLIAFFLV DLSVVVLLGT KIITPHASF  
SFNISPDIGSAYAIGKVLYTDFILPFQTSGIILFVAMIASIALTLRMREGVKRQNVSHQL  
AQS KESNLTF AKLDGKSGLDNLNYDN

>gene\_1438|GeneMark.hmm|105\_aa|+|5989|6306 >NVVL01000062.1 Rickettsiales  
bacterium isolate NORP64 Contig\_source1382A\_23967, whole genome shotgun sequence  
MTINEISLEHYLILSSLLFSIGVTGLFMNRKNVITILMSVELMLLAVNLNFIAFSAYLQD  
VVGQVFSVIILSIAAAEISIGLAILVLYSRNRGSIEIDDINQMKG

>gene\_1439|GeneMark.hmm|643\_aa|+|6310|8241 >NVVL01000062.1 Rickettsiales  
bacterium isolate NORP64 Contig\_source1382A\_23967, whole genome shotgun sequence  
MEFILKSLIFLPLFSGIINGLFCRFTNKLASISSGAITISALCALFIFIEAGIGQNTM  
HVTLARWISIDSLINWALYVDQLTAIMFLLVTAVSAVVHIYSLGYMADDKNLPKFLSYL  
SLFTFFMLSLVSADNFVQLFFGWEGVGLCSYLLIGYYYHKDSANNAAIKAFIVNRVGDFA  
FIIGIVMIIITYTGSIDFENVFGLSENLSKTEVTIWDTNFIVLDIICLMLFLGCMGKSAQI  
GMHVWLPDAMEGPTPVSALIIHAATMVTAGVFLIARCSFMFEYSPFVLQIITIVGAVTCLF  
AALVAIAQTDIKKIIAYSTCSQLGYMFFACGVSAYQAGIFHLVTHGFFKALLFLSAGSVI  
HSCHQQDLFKMGGLRKKMPITYANFWMGSLAIIGIFPFAGFYKDLVLESAYAAGGVGAF  
AFALGIIAAILTAIYSLKIIIVLVFHGKTNLSKEAFDHAHESPRIMNLPLILVAGTLFAG  
MIGYYILSIDSPYGFSGSIFNLHISESGHHVALGIQLLPLIVGLAGMLFGWYVYGNLNS  
DAISGRMKFAYHILKNKFFFDEIFEALFIKPASRLSSLAKIFDSHCIDRLFCGGSAGAAG  
IFNWCVCQVQTGYIFNYALYIVFAVVVAITAFVGNLYGVVSI

>gene\_1440|GeneMark.hmm|496\_aa|+|8243|9733 >NVVL01000062.1 Rickettsiales  
bacterium isolate NORP64 Contig\_source1382A\_23967, whole genome shotgun sequence  
MLNLPILSISILLPLLSALYIVFFISNSRSEKKQLYAMYVAILASSLTIATTYLLFSFR  
FKIAGFQFVERYSWVDSIGLEFHVGVDAMSVYFIFLSALLTLICIIASLFTIKKHIKEFL  
LCFLLESFCIGAFSAINLLLFGFFEVILIPMYLIIGIWGGKDRVAAAFKFFLYTFFGS  
VFLIIALIIYISQTGTFSMVELANLAPEFSLEVQQWLWLATFISFAVKVPMVMPFHTWLPD  
AHVQAPTAGSVMLAGILLKGGYAFLRVSLPMFPGASEYFAVYVLGISGFAVIYASFVAL  
AQDTMKKMIAYSSIAHMGYVTGAIFSFTVKGISGAVFQMISHGLISSALFLIVGMLYERH  
HTKEIAKYGGVAASMPVLATFFMIAMLSVGLPGFSGFVGEFLSILSIFEVNPVIGIMCA  
FGVIIGAVYMLKLYKCVMFGEVVDKNIINFTDLKLYEKAALVPLICLIYIGLAPNGVLK  
ALAVPSANLAQLYGAL

>gene\_1441|GeneMark.hmm|466\_aa|+|9771|11171 >NVVL01000062.1 Rickettsiales  
bacterium isolate NORP64 Contig\_source1382A\_23967, whole genome shotgun sequence  
MLNQFAIILPEMMLALLAMTMQMAGVFLKNHTKHICATTYILGLAIVGYLLYFVPEYELG  
FSDSFGVSPAIYFFKAVVLSLALMSLIYQDLAKISQTHLRFEFMTLVLLSTLGVFISIS  
AQDFMLLFCGLELQALSGYALAAFDTKRAKSSEAGLKYFVLGALMSALMLLGISFLYGF  
GSMNFIDIRVALGSEFNIGLVGAVLMLSSILFKISAAPLHIWTPDVYEGAPISSVYFA  
VAQKIGMLVVLINVLGDIVIGNYTAISASLIKIVAIFSMVIGGLGAIQHSKRLMAYSTI  
LNIGYVLVAVCLQSHEGSHAAFVYMLIYVVGVMGFFACIVALLGAKADEASFDDLKIGIS  
QRKTIAAAISIIMFSMIGLPLAGFFGKYYIFYNAVVMQGEITLALIGVLSSVVAAYYYLK  
IIFMYFMEPDGEFIHIPHAGLRFVGVITVSFILLFFSFAQSYLF

>gene\_1442|GeneMark.hmm|250\_aa|+|11193|11945 >NVVL01000062.1 Rickettsiales  
bacterium isolate NORP64 Contig\_source1382A\_23967, whole genome shotgun sequence  
MTLNWLESYNLLTLDKIDSTSAEAQRLARSSAEEDYVVISKEQSAGKATKGREWDSPKGN  
LYSSILISSKGLERPELSFLVANAVYDAITSLAISQEVLEDIKLPNDVLLINGKTA

GILLESIFVKDRHYVMIGIGVNULLHAPNHLNCPVTSLFDEGVHPGGAREFLNSLMTNFHR  
LYSGWLSDDNNFAKTRSDWMGRAYNLNKVITIDDGLRRTSGVFKEISFDGSMVMQLASGQF  
CSLASGEIEL

>gene\_1443|GeneMark.hmm|248\_aa|+|11935|12681 >NVVL01000062.1 Rickettsiales  
bacterium isolate NORP64 Contig\_source1382A\_23967, whole genome shotgun sequence  
LNYSKRRKKNYNMKNISIIAEPQMGENIGAAARSMKNFGCTDLRIVNPRDGWPNDKAIS  
MSVGAIDLQINARLYDSVRDAIADLEYVYAATAAPRGMNKDYVLSRDLRNDMDPCKIGI  
MFGRENYGLNNQEISLANKIVTIDTDINFSSLNIAHAIIVICYEIFQTKEQPRTDLENKQ  
QLATNVDLEYFYNHFLGELGNRSFFRTPEKKEHMSRKIRNIFSRIDGLSQTELQTLRGIV  
TTLRDEK

>gene\_1444|GeneMark.hmm|104\_aa|+|12730|13044 >NVVL01000062.1 Rickettsiales  
bacterium isolate NORP64 Contig\_source1382A\_23967, whole genome shotgun sequence  
MQKIRLSEFYREAIKAFKGFHFGADDHLWIFGSRVDTQQKGGDIDLYIKTQEVDARIANK  
MRAQYHQELWKILGEQRIDIVLNIYPFELKLPYIEIAENGVLV

>gene\_1445|GeneMark.hmm|152\_aa|+|13064|13522 >NVVL01000062.1 Rickettsiales  
bacterium isolate NORP64 Contig\_source1382A\_23967, whole genome shotgun sequence  
MISLLKEHLKIARIHALRIKEAREAINHLFPPTPAIIIEELTCSDIAFLELYTNRFSKLQD  
LIGAKMFPEILLYGEDLQALFFIDRLNKMEKIGILNDAQEWLYMRKISKQLSHEYPENP  
EFLADNLNIICKLEPELLACLANIEKLAKTMI

>gene\_1446|GeneMark.hmm|169\_aa|+|13519|14028 >NVVL01000062.1 Rickettsiales  
bacterium isolate NORP64 Contig\_source1382A\_23967, whole genome shotgun sequence  
MNYFKLLELEQKYDIAPSLLEQQYLNKQLTYHPDKAESEPMRGKYLEISMQLNDAYKILK  
DDYMRAEYMLKLSGQKFDLTLKNKLSNSEIEEIIIDEYELIDEIDQLPKLKEIQLAKNSD  
KLKLTKELTDCFSNNETAKALDLTVRLKYLTNLVRNIKLIKHADSRDQ

>gene\_1447|GeneMark.hmm|605\_aa|+|14006|15823 >NVVL01000062.1 Rickettsiales  
bacterium isolate NORP64 Contig\_source1382A\_23967, whole genome shotgun sequence  
MQQVEISEPNSEDEGANEAPEIVVIGIDFGTTNSLIAISNDSSAKIIMHDGAELLPSVIEI  
IDDEIIIIGNKATQNPDAIRSIRLLAKTSKEIKSAYAGSALSGLALEESEPKILAKGRK  
FTITEMASEILKYLSQAEASLETDVNVKAVISVPAHFNNTQRGQVLLAAKLAGFSVMRLI  
SEPTAAAYAYGLGKSARGAYLVYDFGGGTFDVTVLNMHQSVLQVVATGGDNMLGGDDIDM  
ILAKYIAKETNSDLNNEIALAKTKEDFADKNEVALNFNSTNIVISKAKYEELITPIIN  
KTIKIAKDTLHEAEDIDLNGIILVGGSTRVSLIKEKLNKAFALPIYSDLDPKIVALGAA  
LQAENLSSRSGSLLIDVVPLSIGLELYGGIAEKIILRNTPIPFVSTKEFTTHADNQTGIN  
FHVVQGEREMVKDCKSLAKFELDSLSPMKAGKARIEVTFAMDADGILSITALDAESGRAQ  
NIEINPGNDLNEKEINEALSIAFQNASADHLARLLAEARADAQSLISGIEKAMLDTPDIL  
NEPEKNQIDIAISSLQKEINSDNRDEILLKIDELNKLAAGFIQKHLDKGADLLKGRHID  
NINSK

>gene\_1448|GeneMark.hmm|112\_aa|+|15831|16169 >NVVL01000062.1 Rickettsiales  
bacterium isolate NORP64 Contig\_source1382A\_23967, whole genome shotgun sequence  
MAAETIKVIFIEDGTEKEIEALVGLSILEIAHENDIDLEGACEGLACATCHVVLEEKTY  
NSLEEPEEAEDMLDLAFLGTHTSRLGCQIILTKELDGMRILLPSATRNINL

>gene\_1449|GeneMark.hmm|355\_aa|+|16174|17241 >NVVL01000062.1 Rickettsiales bacterium isolate NORP64 Contig\_source1382A\_23967, whole genome shotgun sequence  
MIRKIALFTILVLIWFSWAYLIKGNILKAIDNLASDNIFSYQGSKISGFDFDLKLR  
ISPKVTIIDQTSLEHSTKEIEFKFGYSFKSSVINLGGKIIYNKSNNGNAKQEYTLSEEN  
IIIAAGFKRPFMSPSLGAVKDIASIHLLPKLECRDRSNSSSSSDDTGSASGGGGGGG  
GDSHNQPLFTASSIELLSLQETDNIEDRFSLKFTGEYDAPSQLSKIAKAHLSANLNYISK  
REYKEPKEVNFEEKLEIQNIKLLGDALLAINGALKLTKSALPQGRINVSMVKYQEIIDA  
LIPENFIISPSRLKKTIDKTTTPQAINPASADFHIFSEKGISMESSAKKLRPQT

>gene\_1450|GeneMark.hmm|230\_aa|-|17402|18094 >NVVL01000062.1 Rickettsiales bacterium isolate NORP64 Contig\_source1382A\_23967, whole genome shotgun sequence  
MTDFQIYSELYSRLGIKDTVYLAFRDIPELINKHVSGRKTLDGFCGAGRSARFLKELGME  
VNGVDSSIEMITQAKKIDDSISYEHISNNYFTQHSEYDVLVSSFFVFETSSLDLMLLEIF  
QLIHKTLKNDGIFILITGSMEMYSHNWLSLDANYPENKNPTSGSLVKIKLKNVDLELDDY  
FWTDDDYKITAAGKAGFSLEMHNPIGTKHDGYKWKSEEIVSPYSIYVFKK

>gene\_1451|GeneMark.hmm|247\_aa|-|18102|18845 >NVVL01000062.1 Rickettsiales bacterium isolate NORP64 Contig\_source1382A\_23967, whole genome shotgun sequence  
LADNLKINLMNQVTKNNILAELMKECGIDDIKLSQYTNVPISSISRIRLAKNCNPTIST  
LQPLADFFDVSIEQFLNYQPLDDDRIPGTHKPTLFTSSMLPVIKWSDVIDFIDNKETFFS  
NKKIEWVASEQETSENSFAVEIPDASFALFLKKGSTILIDSEKTIKNGDFVLFKVKKNKL  
IVLKQVLEKDNVYIKSMNSKTNTTRTIPESYITLGNVIEIRCNLQSAPKQNNPRTNAIN  
ILNPLKI

>gene\_1452|GeneMark.hmm|312\_aa|+|19103|20041 >NVVL01000062.1 Rickettsiales bacterium isolate NORP64 Contig\_source1382A\_23967, whole genome shotgun sequence  
MFFKSLSSLFVDSISLNKSKYKVLSDIDEGQIPPEVICEIADGTEIKFKLEDIKENKL  
KYFMSKDALQIANCFQIKISNSNAIRERNQDNKYLHTLSQMFTVLFIVSNIAAAKLSSF  
QGIAFCGGIITFPMLYVLNDVITEVYGFRRSRRVIWTALFYNLLAFSLLYLAIFLPHHDS  
WSNHEAFEKVFSLSPRIFVASMYSYLVGEFFNSVLLANLKIKNRFFGLRALFSTLSAS  
FVDTAIFFFILFWGVIPYTEMIPMVVILGLVKVLYEALLIPLTIRLVAFLLKENSDFE  
KPSLSNMMLFTG

>gene\_1453|GeneMark.hmm|74\_aa|+|20046|20270 >NVVL01000062.1 Rickettsiales bacterium isolate NORP64 Contig\_source1382A\_23967, whole genome shotgun sequence  
MILEDKDNTPELYAKYKITGTPYLPFRDMPNINLKYVEGKKALDFGSGAGESTIFLKS LG  
FDTIGVDINEITRV

>gene\_1454|GeneMark.hmm|60\_aa|+|20367|20549 >NVVL01000062.1 Rickettsiales bacterium isolate NORP64 Contig\_source1382A\_23967, whole genome shotgun sequence  
LQSGARVKIEFRNIDLTIIDYWTQENYTEIFQKAGLHIIHNP LGMQVMGMNGGTRQC

>gene\_1455|GeneMark.hmm|972\_aa|-|20739|23657 >NVVL01000062.1 Rickettsiales bacterium isolate NORP64 Contig\_source1382A\_23967, whole genome shotgun sequence  
MLFGVEIGLDMGIVIGLLLLLIIGVFFCKGVNSIKQYAIADRNFSTGVLAATITATWIG  
GGFFSLTISKTYSDGINYIILGLCEVVAFLVLATLIAPRIKSFLGSLSVAESMGTLYGKN

AQIITALVGIARVTGTIAIQFKVCSTVLTYFFGISSTYSTIVSASIIMFYTALGGIRAVT  
FTDVIQFITFTIFIPILSMTIWGTIDNPQIVLDTINTNPALNFTKLASLSGTELYSFIAL  
IILFIIPGLDPAIFQRIIISKDITQAKHSLYIATGAFLFISLVTFWMGVLLLSNAPDLNP  
VDLLGYVVDYTYTGLKGLLAGILAMLMSTADSYIHSASILFSHDFCVPLNLQWAQKNE  
LLLSRIFAVVISIFALMLALSTANLFEILVMAGFYMPLVTVPLLLAIFGFRTSVKSYSF  
GIIVGFSTLFPRIFDLGDGAIIVISIFLVALSILSFHYLLNQGGWKLYQKEVLCTN  
NTCSHSCKLLWQVQNFNIVEFCKMNTPKNEITYTLVGLFFIVAVFSTMYSISFDIRHQY  
PKLLEFIYHSVLTISSGFLTYPMWPPRFKNQNFGAIFWIMGLFYILVFGCLQVIISNFG  
QFQLMVFLLGIVILSTLVRWQAALLLIITGCISSVYFFKQWYAGIEQLNGGFGGLQFKIMY  
VLILLSSILIVFFKPKQEHLEQTEHRVGELSDEVGTLVAVVSSRDSQISTLDTKVSGLLE  
RVDHYTERTTNAQAEIERLGATAQRILNNVNHELRLPVGNVMMNFSEMLHDGLKLSDEQL  
KMLSKEVYQNSNRLSTMILNMLDLATLQAKKIELQIKLANFSELVEERLTACRKIYVEEK  
PLKFIIEKNVMVPMDANYIRQTIDNLVINAINFSEKGIKLVIVARQTNFVFTTIQDQG  
IGIPLSELYDVFTPFKMGSNTEKAEGRGVGLALCKAAVNAHGGEVKVLESSGAGVLFRRVV  
LPLESDRGRPRS

>gene\_1456|GeneMark.hmm|91\_aa|-|24062|24337 >NVVL01000062.1 Rickettsiales  
bacterium isolate NORP64 Contig\_source1382A\_23967, whole genome shotgun sequence  
LVTVAKQTNFVFTTIKQDGIGIPLRELYDVFTPFKMGSNTEKAEGRGVGLALCKAAVNA  
HGGEVKVLESSGAGVLFRRVVLPLASDRGRPRS

>gene\_1457|GeneMark.hmm|468\_aa|-|179|1585 >NVVL01000063.1 Rickettsiales  
bacterium isolate NORP64 Contig\_source1382A\_24304, whole genome shotgun sequence  
MAKYEKNIMSFKDLPAFLKLEKNGHLKRITIEVSTKLEITEISRRFLAKDGPALLFENV  
IKEDGTKSEYPVLTNLFASKQRIAMGLGMKDASELREFGALLAFMKHPEPPTSLKETFSM  
LPIAKRILSMPPKTVSKAPSQEVVIKPNPDLILPIQTCWPGDVGPLITWPLIVTKGAGSE  
KTDNYNLGIYRLQPAGRNLIMRWLKMARGGAQHHEKWKRTQQKMPAAAVIGANPALILA  
AVMPIPNTMSEYNFAGLLQNKAIIDLVRCKTSDLKVPAAHEIIIIEGEVSMSEYLPEGPFGD  
HTGYNDVELFPVFNVTAITMKKKPIYLSTYTGKPPDEPSILGEALNEIFVPLIQQQFPE  
ITDFYLPPEGCSYRICIVSIKTYAGQSKRVMMGIWSYLQQFTYTKYIIVVDDDIIRDW  
KEVMWAISTRTPKRDSTFIESAPIDYLDFAESPESGMGSKMGIDATNK

>gene\_1458|GeneMark.hmm|356\_aa|-|1558|2628 >NVVL01000063.1 Rickettsiales  
bacterium isolate NORP64 Contig\_source1382A\_24304, whole genome shotgun sequence  
MQTYKKYLSSILPPMAMLTLLTSLVWITQTLKYIFLIDKGIALATFFRLTILLVPYLL  
YMILPIITVITIIYVYNHLQDGRQLIIFRNSGLSNYQLAKPALLVAICFTIITWYISMHL  
MPFSYNLMKQEMANFKEGYISKIIDAFTNQISKYHTVYVDKKNPDGTLEAVLLFDNKVS  
ANRTMLFAKTGRITISDEQHIEFELNDGFRHSYDHLGNLTCLYFDNLAVIINGETNASHT  
RKNSSELFINEMLFPDASLPLKRNRLIADGHSRLVWPLFNFAFVFLALSIFLNQPHNRA  
HIKPFILTFPLLLASYLHFTLQKLAYKNLDYIFLCYANVFLCICAIWQNMKKT

>gene\_1459|GeneMark.hmm|496\_aa|+|2904|4394 >NVVL01000063.1 Rickettsiales  
bacterium isolate NORP64 Contig\_source1382A\_24304, whole genome shotgun sequence  
MRGKLTVGETTIDLFDMNLQKVLNVLNLTNTNQEEVVFKAFTGGRGFLDAILSVYSRAC  
SNGEEADMMLMPLFVKRMKALFAKNELWGTAQEPGVQLVGLATELDRLLILNEDATIPDL  
QARLNRLIQAPQAQLTVMQNLPEITNPAALAKQIRCLELGERIRNASDTSEGELESTLQFG

EASTVISSDSGGIAEIESKSLNLHLEGKRLGNASDLLFESACSNAPPTAPVLLAIIGAGE  
KTWGYPMTDYRIQTMRFQFFGTTFSYGDGVHEISKQMSLAVLNTHLSCMQKESHGQQYS  
KANLGVVLFYAHGAESEDGRVTKLVEIVNTRLSSIFERTVVIHACYSQYHDLELGENV  
FMITSASHKNPQSSLISSFNALKDVAKYFPQGRADLPGFLELFASYEASQPAFSGKIGD  
ELFKGIEIAELLSSSDIVAALAELESPDASPAASEELEQPHCTIAVHDFSNIHEDAPGNP  
ALIGDDDGALDVVAS

>gene\_1460|GeneMark.hmm|112\_aa|-|4424|4762 >NVVL01000063.1 Rickettsiales  
bacterium isolate NORP64 Contig\_source1382A\_24304, whole genome shotgun sequence  
MTQKQIMSIDAASQVKALLSQRGKPSVGIRIGVKSGGCSGLKYFVEYADEKNQFDEMI  
CDKEITILIDPKALMYLLGTRMDYAEFEFKAGFTFTNPNEKAKCGCGSSFN

>gene\_1461|GeneMark.hmm|126\_aa|-|4759|5139 >NVVL01000063.1 Rickettsiales  
bacterium isolate NORP64 Contig\_source1382A\_24304, whole genome shotgun sequence  
MAYSEEVIDHYENPRNVGAMDKKDETVGTGLVGAPACGDVLLKQIKVNDSGIITDAKFKA  
FGCGSAIASSSLVSEWVKGNLDDAMAIAKNTAKHLSLPPVKLHCSMLAEDAIAKAISD  
YKQKQK

>gene\_1462|GeneMark.hmm|418\_aa|-|5164|6420 >NVVL01000063.1 Rickettsiales  
bacterium isolate NORP64 Contig\_source1382A\_24304, whole genome shotgun sequence  
MHNYTELKQRIVDEGGRFPIYLDNQSTTKTDPVVAAEMMPYFTDKFGNPHSRSHSYAWET  
EDACEIGRARVANLIGANPKEIIFTSGATESNNLALRGIAQFYGSKKKHIVTVVTEHKCI  
LDTCRYLQQDGFKVTYLPVQANGIVDLNVLDAITEDTMLVSVMAVNNEIGVIQPLKEIG  
KICREKGTFFHSDIAQAFGKIPINVNECNIDLASISGHKIYAPNGIGALYIRRKPRVRVS  
PMITGGGQERGIRSGTLSTPLVVGFGKAAEAGLEMEKDQKHVRKLFDKFLTAIQSNAEE  
VFLNGDKEQRYHGNNLSFAHIEGESMILAIKDLAVSSGSACTSASLEPSYVLRALGVDE  
ATAHTSIRFGFRFTTEAEVDFAEIVILANINKLRELSPLWEMHQEGIDINSIKWSTH

>gene\_1463|GeneMark.hmm|373\_aa|-|6413|7534 >NVVL01000063.1 Rickettsiales  
bacterium isolate NORP64 Contig\_source1382A\_24304, whole genome shotgun sequence  
MIYLDHNATTILHPFVKTKMDEIALFPINPSATHSYGRKKGKILENARRSIARLLCFDDC  
HKDYQVTFTSSGTEANNLILFNDAEIFISATEHPSILSHKKFSSNIQTIKVDEDGILD  
FDDLINKLQNSKSEKLVSVMLANNETGVIQPIKIAKIAHEHGAIMHSDCVQAIGKINV  
NILDLDLFVVISGKFGGPIGVGALIGKASILLKPMILGGGQEKNLRAGTENVHGIAGL  
GEAALLAKKELTSRNTHMRKLQKQLESALLESFPEIKIAGMKSERLPNTSLILNSRKKAE  
IQLIAFDLKNIAISSGSACSSGKIGLSYVLEEMGCSEREARSARVSVGAGSTEEDIDNF  
IKIYKEINKESYA

>gene\_1464|GeneMark.hmm|129\_aa|-|7537|7926 >NVVL01000063.1 Rickettsiales  
bacterium isolate NORP64 Contig\_source1382A\_24304, whole genome shotgun sequence  
MAVTEVAESSDGNTPMKLADISTNQNIPLNYLEQIFLKLKARLVNSVKGPGGGYYLAEP  
SDKINIEQIVNAVEENLKMTRCSKDKSCRKNGVSCKTHNLWKGLGRQIRNYLASISIADV  
VSGNVNLGE

>gene\_1465|GeneMark.hmm|110\_aa|+|8219|8551 >NVVL01000063.1 Rickettsiales  
bacterium isolate NORP64 Contig\_source1382A\_24304, whole genome shotgun sequence  
MLYLLVGILFILGRLAIKLITKKGIVVMPKEACTNKSEIWNKSGTVASKDDDDDAVATL



GQAVSSKVTGGNIEIVTVGESFDEGESENEGEGSNEIVAAGETANSEEGQ

>gene\_1466|GeneMark.hmm|422\_aa|+|8946|10214 >NVVL01000063.1 Rickettsiales bacterium isolate NORP64 Contig\_source1382A\_24304, whole genome shotgun sequence  
MKTIKRLLQPLILEALQSFPVYINGPRQAGKTTLARTLLAKEFKAKYITFDDPLERAAA  
MRNPLGYVRESGIPLIIDEVQMAPNIFRSLKMLIDEQRMEALSSSSAAASSSANGHYLLT  
GSANLMVIPELADAMVGRMATLTLPLSASEVKNSTSHFLDYCFTKDFSKIKADNTKLTE  
IMRQASFPPELMQMPESMVDKWLGNVIQKVTLEDPRYIYNLEKAEFMPALLQSLAVRAGNL  
INDASIGREIGLNVVTRNYRALLNGTFVTNTLSPWYRNITKRLVKSDKIFFHDTMLLCY  
LLQSTPEELVKNQPSRFHVLNENFVLSLCKANFASGEKVNISFYRTNDGREVDFILEKQ  
NKLVAIEVKHAENINDKDLAGIKEFQAHTGND FCCGIVLCNTPRVIAYGKDIYLVPSAL  
WQ

>gene\_1467|GeneMark.hmm|603\_aa|-|10600|12411 >NVVL01000063.1 Rickettsiales bacterium isolate NORP64 Contig\_source1382A\_24304, whole genome shotgun sequence  
MHTFRTHHCNELKSQHVGQRVKLSGWWHRRRDHGNLLFIDLRDHYGITQLVFTDKDLSLK  
DKATHLRYESVITVEGTVVARSNETANNSIETGQIEVDAEKYILESDSEMLPLIVNSDQD  
APEDTRLKYRFLDLRREKLHSNIMLRSNIISEMRKLMTEAGTFEQTPILTASSEPGARD  
FLVPSRMHPGKIFYALPQAPQQFKQMLMMSGFDKYFQIAPCFRDEDARADRSPGEFYQLDI  
EMAFVTQEDVFAAIEPILFNIFNKFGNKKLSVSSFARIPYAEAMLKYGTDKPDTRNPLEI  
TDVTDLFKDAEFTLFREAACKGAVVRAIPAPGASTKSRKFFDGMTKFAINEGAGGLGYVN  
FAEDGTAKGPIAKFLNDDQLAKLQELAKISAGDAVFFACDKELAAAKLAGKVRTKLGQEL  
ELIPDDVFELCWVTFDFPYEMNEDTKKIDFSHNPFSPMPQGGLEALENAKTEEELLAIAKAF  
QYDIVCNGIELSSGAIRNHKPDLMYKAFAEIAAGYSQEEVDKEFGGMIRAFKFGAPPHGGIA  
PGVDRIVMMLAETANIREVIAFPMNQQAEDLLMEAPNHVSEAQLRELNIMLSPSVKSKLA  
KKD

>gene\_1468|GeneMark.hmm|286\_aa|+|12488|13348 >NVVL01000063.1 Rickettsiales bacterium isolate NORP64 Contig\_source1382A\_24304, whole genome shotgun sequence  
MQLIKNQEDFDKICEKLETEQTLFIDTEFQRKKTYAKLSLVQIASKHHKVVIDVLLIDD  
LTGLKNLLANEEILKVFHAPDQDLDFLHIFKQLPKNIFDTQIAAWVWGLDECMGYSRLC  
KALLNLELDKSLQNSNWLKRPLTDDLLEYAIKDVEYLIPLHRELSATLTRKRLWDTYNDK  
SAKWLKEGTYKINPDKVIKRMKLLDYSRKYKHKIKSLILLRECAQTLDLPRFFCAADKD  
LTRLCRELPTTEAELVKMNFLKKPIARRQFKKKLLELCAGLREFKL

>gene\_1469|GeneMark.hmm|177\_aa|+|13430|13963 >NVVL01000063.1 Rickettsiales bacterium isolate NORP64 Contig\_source1382A\_24304, whole genome shotgun sequence  
MKIKFALLTKLVAPISVALISLVALVTSPAIASDYPQSRLEREIEETGSLLKGDGLTFRP  
GKERSTATKATIGNVNKYLYQASIDVLKFAPLASSDSNAGVIVTDWYSPKGQKNTQFKVT  
VYIRDKLISPEALEVVVFQRDKTGGKWPSDYKESPIAATFEDKIIRKARDLYLNSAK

>gene\_1470|GeneMark.hmm|842\_aa|+|13974|16502 >NVVL01000063.1 Rickettsiales bacterium isolate NORP64 Contig\_source1382A\_24304, whole genome shotgun sequence  
MNILEIERKWQQRWDQDEAFVAKNDSKPKYVLEMFPYPSGKFHVGHLRNYAIGDVISR  
YLQASGYNVLHPMGWDAFGLPAENAAIANDTHPADWTYANIDSMRAQLKSVGLSYDWNRE  
LASCSPDYKHEQKFFDLLARGAAYQKESVNWDPVDNTVLANEQVVDGRGWRSGALVE  
KKYLKQWFLKITDYADELLTDIDSLSEWPENVKTMQRNWIGKSEGARFHFVQNLDEKIE

VYSTRPEVIFGASFVAIAYNHPLTQKIAINDEMKAFIDKCAHHSTSESELEKDDKECVYT  
GLYASHPFDKTIKLPIVIANFVLM DYGTGAVYGC PAHDQRDFELVQNTKDLEITQVVHSD  
NHEIDL SKHAYIYGSD DVMINSDFLDGLQTDQARAKIIDKMEELGIGSRETNYRLRDWGI  
SRQRYWGCPPIIYCESC GAVPVPEEDLPVELPRDISFEKTGNPLDLHPTWKYVDCPKCQ  
SKGVRETDTFDTFFESSWYFTRFC DNKAKDMADKKAADYWLPVDQYIGGVEHAILHLLYA  
RFFTKAMSDVGYLNVREPFKRLLTQGMVLHATYKDKDGKWLYPEEVVEKDGKYLHAKTGD  
EVFKGKIEKMSKSKLNIIDLETMLATHGADVIRMFVLS DSPAEKDLEW SMAGIDGCKKFI  
SRLVSLVKKLPDLEGVNGGAEDKNLQASIHRTIADVSD DLMNYRLNKAIRIRELYNATQ  
SALSAAKPDTASICEAARVMIQLLSPFIPHITEELWEM LGNKVPLYKTSWPKADKSKLVS  
DSYVMAIQVKGLRATHEFAVSATDAEIKEVAINLP AITKHIGDAAIRKIIVVPKKIINI  
VI

>gene\_1471|GeneMark.hmm|231\_aa|+|16503|17198 >NVVL01000063.1 Rickettsiales  
bacterium isolate NORP64 Contig\_source1382A\_24304, whole genome shotgun sequence  
MRIAKFIANAGICSRRAAERLIEDGEVSVDGEVIDSPALNISDENI IKVGGKLVGAIPKA  
RLWVYYKPLGLITTNSDPQDRPTIFQALEGKLP RVISVGRDLINSEGLLLL TNNGDLSRY  
LESPSTNCERIYKVRTFGKGREVAIRNKKIVIDGVNYHPKLISLTKKTVSNSWYKVVLTE  
GKNREIRRLF EHFGEVSR LIRTFDGKYS LGNMKPGDLLEVTIDQNYSWKT

>gene\_1472|GeneMark.hmm|188\_aa|+|17170|17736 >NVVL01000063.1 Rickettsiales  
bacterium isolate NORP64 Contig\_source1382A\_24304, whole genome shotgun sequence  
LIRIAGKHKNRVIPTLKKADYRPSTTKFREALFSILSSGEFAESQPVTGATLLDLFAGT  
GALSFEALSRGAGSITLIDSNETHLKLAK EFAAKIGEEDNVTTLTANALLPKSITKYDL  
VFMDPPYYNDMVAKSLKCLIKRDWLANGALIAIEMSARERL DLLDGLILLKEKRYGNK L  
LILKYEQS

>gene\_1473|GeneMark.hmm|445\_aa|+|17723|19060 >NVVL01000063.1 Rickettsiales  
bacterium isolate NORP64 Contig\_source1382A\_24304, whole genome shotgun sequence  
MSKVKKQYSCASCSTSSKWSGQCPDCMEWGTISEEMSSASRIMVPKTGTPQQQLQSLSDQ  
VESTIRTKTPIEELNRVLGGGLVSGSAILIGGDPGIGKSTLLLQLSASLSQNNTGCLYIT  
GEESINQIKLRAQRDIDKDTKTGLLAATNVEDIISTIDQNKKELDLVVIDSIQTISTSEL  
SSAPGTVSQIRASAHMLIN YAKQNSITLLIACHVNKDGQLAGPKVLEHMVDTVLYFEGDH  
NNHFRILRSIKNRFGAVNEIGVFEMTAKGLIEIANPSELFLMERENNVSGSAVFAGIEGS  
RPLLEIQALIAPSNMATPRRSVVGWDHNRLSMIIAVLSVRFGLNLT SHEVYLSVAGGLR  
ITEPAADLAVAAA LISAASNAPLPQGSVFFGEVGLSGEVRKVSQTEARVKEASKLGFKKM  
YCCSKEKLSVEAIMHLRQLKDVIV

>gene\_1474|GeneMark.hmm|597\_aa|-|379|2172 >NVVL01000064.1 Rickettsiales  
bacterium isolate NORP64 Contig\_source1382A\_24651, whole genome shotgun sequence  
MENSTRQVVLKDVQIDGYKRMKEILCYRSCVINTSPLGAGKTILTLKYAAETNSNLFIVA  
PLTVHETWKRECRKYGV DYVDIITYDKLRGRGRSREGTSCSGFLERKAIFSHSLDRDEYF  
YYPTEELEKYIEFGTLFV FDECHKIKNVNSIQHRAACKIVEAARGSASRCIFLSGSIADK  
KIFTLSICRYLFLTQETRLGNLNSGGLSDVYNLAIGVNKKLANKIAKSYHDPEDVLFELY  
VKIIRPIFSFYCPMGNSELKDFKNGKYNIENENYDDAVDALRDAMKNHTEWRSRFRITK  
SLVLLEKIKLHKIYKLAGTLNADSNKVCIFLWYNDHVGD MIDFFDGKYTLAVLCGATK  
SSDRQNAIDHFNQENNKCRV IISTTQTGGTGVSLDDTSGNYPRTAYCTPSYFSSDLYQLS

GRICRANTKSVSTLRVVYGNRTDEQYLIKSLSDKGNIMLKFLGYGKNIVDIPGSFGSYNE  
PKERENEYETKPKVELKVLSDSKVELEETLEENLEEVLSDESEVELDEPLDENLEEVL  
SDESEVELDEPLEEKLPYEPEGKYERENKIDNFTLAAQGRNIAECEVSEDLLKLLG

>gene\_1475|GeneMark.hmm|260\_aa|-|2271|3053 >NVVL0100064.1 Rickettsiales  
bacterium isolate NORP64 Contig\_source1382A\_24651, whole genome shotgun sequence  
MDKINVCVLTLLKKESENVKRISIFSDIYNLILIPITNIVDSVSNVSDVESHLDTKRML  
HALDMSKTIDPEAITIILKDOTSIFSSKKDHLVLEVIKTSLEVEDWDLVYLNRLWDRCDLYT  
DDRHRVGNTFTIIRTRSPNGTQAIMFVIGRDRILGVEPLRDSTYFKLVNISIDTLLNI  
SIENSSLFAYVIVPNLVEFDIGVSSTLSNLAKMSECRAPPDVSNKGLLPFTLFLGIVICT  
FLLMWAYGKISKVSIKDSVV

>gene\_1476|GeneMark.hmm|339\_aa|+|3075|4094 >NVVL0100064.1 Rickettsiales  
bacterium isolate NORP64 Contig\_source1382A\_24651, whole genome shotgun sequence  
MESKFIPLVLAMIMVFATIIVIVLAVSQKGRQLKLGENCSTRYPCSRGLTCQSNKCKSNSG  
EFCNTLTDCTSDNLSCNNKCTNVGGSIGNICTELLPCNPELICEKGICKSKLNGSCDNN  
SECIYFICVEGTCREDIKVTCDLLDIMTYGCIKLLLFSENKIKRINDNLGISMDITSSV  
EISRFFMYNGLLHSLGVDGKLYALSVPYIEHNYWEWEEQLWCVNEIDHVSRTLDEHNIWIQ  
RKVYVHISGTRGYLYEGNSLISTHSLNVNVIRNYGITTLEYVEINKKTMVVMYATPSGVILN  
NVSARIGFDSKIVHSGGELIKVIFDRMVKVSIEYTTY

>gene\_1477|GeneMark.hmm|260\_aa|+|4106|4888 >NVVL0100064.1 Rickettsiales  
bacterium isolate NORP64 Contig\_source1382A\_24651, whole genome shotgun sequence  
MSEFNEKSYKGSIALSLLKVKKTQIQMLIDRKIVDISLLPTHILDETYGIGDFLEEFQGG  
GGFRENISNTYKLNLDNLLIYSNTSKSKTTGNSTIKLIIDRVPEITDGSRNHLIVIS  
ELKLSPOAKGIIKNIQYQMKMEHFIYSELETNPSSHFLTPKHEILTDSEVIELYSDHRIQ  
ISNIPRIVKDDMMCRYIGACIGKTLKITYDNSFYDSYLKEYIEYRAVSSVNIDDGEITT  
DYQEKFEDEFSISEYYDEEF

>gene\_1478|GeneMark.hmm|249\_aa|+|5162|5911 >NVVL0100064.1 Rickettsiales  
bacterium isolate NORP64 Contig\_source1382A\_24651, whole genome shotgun sequence  
MGESLESLICDNNIRQIKCNSKLLSLKANNINFLSPNESLEILDSCDNNIRSIEANK  
NLRVLICRKSNLKIKLSNELIYLDCSYNIYTIHLGYNLQYIDCSNNYISCITLHGDIQ  
YANCSKNPLTSVRFTGKSNILYNDYIECALKHKRTKTHSVTKIGKICNISDKPIEFTRVV  
KAQITLYSMCYKVLGKSNKRAIELNHLNWARCFYCLVSYVVDLLGLNETQTYSRAICYLC  
HNSMHNLM

>gene\_1479|GeneMark.hmm|389\_aa|+|5955|7124 >NVVL0100064.1 Rickettsiales  
bacterium isolate NORP64 Contig\_source1382A\_24651, whole genome shotgun sequence  
MDVKETSINKLEDLIYDVKYSGLFGQYIFDIKLLVLSLEKLNSMVGAKKIKESVVKQIKYI  
LMTKIEGRANEFPLHTILYGPVGVGKTTFTGILSNIWKSIGLGKLYTQTPLDSDSPNLTY  
MKNLIPKISGFIASSTSEVRTSVMKLGKESVHPLKLIYGLELDIIFAQIELEEYIIEIEEF  
RKSQEQPKIVSRSDLVAEYTGQSGPKTRNVLQASDVLFIIDEAYSLYNGRGNDFGEEVLV  
EINRFMSESKDKCILIFSGYRDKMEEGIFKAQPGLKRRFSWIFELDGYTGKELSEIFILQ  
TKGKLWDLGEIDIVTFFVNNLKYFERYGGDTLRLVFQJIELLLSTDFGDFLTNSQIKNKF  
IGKEIFSNAFKIYKENIGPVKSPNLNYYI

>gene\_1480|GeneMark.hmm|269\_aa|-|7108|7917 >NVVL01000064.1 Rickettsiales  
bacterium isolate NORP64 Contig\_source1382A\_24651, whole genome shotgun sequence  
MENSLEGLEKLRDGIIDNVNTNYIYSSPHTVPKIIHQWKTNDIPNVWKSRESWIKYHK  
KYVVVLWTDENMRKLLDYYPWFIEYDKFPYNIQRADAIRPFILHRYGGLYSDDLKPT  
KSFPELLKHKSSVILLSDNGRYTNMIMASNIGNPFWINVFDAMKSPNIPWYCGTRHFYIQ  
ATTGPILIDKVARNFKGGKNIIDFPSKFVQPCSICESKPKTSKKAYVIMLEGSSWHYLDS  
KVITFLSCKYKSLLFIFVSIILIFIYNN

>gene\_1481|GeneMark.hmm|62\_aa|+|7986|8174 >NVVL01000064.1 Rickettsiales  
bacterium isolate NORP64 Contig\_source1382A\_24651, whole genome shotgun sequence  
MNFYFYVDGFVTVNVNMSELILLSLLDDDEFNDPTALASALRIIRGKINVFLPLIFDYH  
EW

>gene\_1482|GeneMark.hmm|57\_aa|-|8586|8759 >NVVL01000064.1 Rickettsiales  
bacterium isolate NORP64 Contig\_source1382A\_24651, whole genome shotgun sequence  
MVHIVIISLIILLVLINISAGAVAFIMRRDLIDCETNESPYCLKYICPNGKEATRDT

>gene\_1483|GeneMark.hmm|469\_aa|-|8760|10169 >NVVL01000064.1 Rickettsiales  
bacterium isolate NORP64 Contig\_source1382A\_24651, whole genome shotgun sequence  
MIKDMYILLTDNDMKVSEKINKGGVSSSKYLYVSIASPSGSGISNIDILYSYGSNN  
RIEAKFSKPDPSRLISIEASNLDDKLLIITYSSKQLGNVLSNTEYIGITNLQKYIYKF  
VGCYALTLALYLLMSHNDNDIGNPFTYLNTTTPMEMSIDNIVNNMNYNNYTKVISP  
MKTGSIGKRLLQSKVFYDTWGEFLPNGKVLNDEALHSSIIIGMSKYMDDKMDKLLSLLN  
DTEIQMFRHKEEISDISIKSMDNITNQQNKTIDLQNFILSNFNDLVAKATDEISNGIID  
KNKCTSGKEMISIHKSMMISEIDSKVSTMMDAFDDQKNQSTEEILELKEKSIETISLYES  
NHTSKQKDAFETLRKGIVKELDKHRDDGVLFDLSLGMKLTSTRYETLTKNIDLVEVESTK  
IESLVSDLMGDMETLVENVIGIKIQKENIEFNNAITFRINNAIKKISDLS

>gene\_1484|GeneMark.hmm|143\_aa|-|10192|10623 >NVVL01000064.1 Rickettsiales  
bacterium isolate NORP64 Contig\_source1382A\_24651, whole genome shotgun sequence  
MDTHTKLVVDVHVYKLRGGNQEKTYDNLREWIDDKDNVYIGRQGRVNILDKNKTSKVFYGYG  
RAIFANPNSGNPKLGEYRKHIENLIEEGTITIADIINLDGKNLGCWCVKGRKKGKDDPE  
RCHGNILMDILNDYRKMYPKYSN

>gene\_1485|GeneMark.hmm|269\_aa|+|10753|11562 >NVVL01000064.1 Rickettsiales  
bacterium isolate NORP64 Contig\_source1382A\_24651, whole genome shotgun sequence  
MNKINKKRFSPEIEHKNFDVFDVYKGNDRVVEVDVEELEEIIKSLRKVAKVKTSELKGD  
DRKNLDKIISVSVLYDTSYKILYGIAMKHWSDLKIISPGTVGSYFAGCIRTSSSSDMQ  
GCEVICAGSMRPNESDEWKQCDKAVIWGKYHKGKYSFNVLQNNSDMSHSILHINCTNYN  
TCPKFSPEDIDTLKISGVETITLRGYKNNGRDHLDLIGKEISVDDLVTNENKESSTLT  
FIVIGFLIFAFCLWQSKYFGLDIQKYLQG

>gene\_1486|GeneMark.hmm|189\_aa|+|11735|12304 >NVVL01000064.1 Rickettsiales  
bacterium isolate NORP64 Contig\_source1382A\_24651, whole genome shotgun sequence  
MCAYVIDSSISLDELQFLKSNACVYGLMNVIMKKGNETNSTLILLSKDYRIIKSIKNL  
KLYGIDTFVPMKRKNCNLSKLRVTIPRNVSPGVCRKHITHLLMIMKSYNLVTDDVEIII  
PLVSRMKSIIHTGVCHIYLNSEKTQNTYIIKNLLDYSYWPMTKEYIRCFHVTPTGGVWVND

SKLTILRKR

>gene\_1487|GeneMark.hmm|1091\_aa|+|12642|15917 >NVVL01000064.1 Rickettsiales bacterium isolate NORP64 Contig\_source1382A\_24651, whole genome shotgun sequence  
MSATHDAGIYKRPNEIEHVLLRPDSYIGSVNSVNREGRIFSGGKVVVEKVISTPEGMVRLY  
LELLTNASDNLYESMQKGVPTFIDIKVDKYSVTVTNDGLMPPIEYSDKYECYIPEMIFG  
MLRTSSNYTDDNKRVAGRNGFGAKLCNIFSSSFLDLSNENGGKKTQQWENNMKTISEPN  
IGLAKGKPSITISYTLDFKRFCDGYTKEDIALFASFAIDTAVTCKIPVKFNGKMFNFKK  
TSTYLNMFVFGKCKMEGFVQGKSRVPDLEVYLMPTPYAGRIYSFVNGIPTKDDGVHVSSVL  
NSIIRPIIRTINKNIKQSDIRSGVTMKNATSHISMYSYRCIKPEFTGQMKSCLNPKPR  
ISVPVGMVDKVGKWTFFVTKLNNILKDKCQKELKTDGKKKKHISVDTVEDANFAGHRTKY  
RFCKLYVVEGKSAMAYAIISSMEGRDFNGAFPMKGKPLNVMRHPNKVFENQEILNLK  
KVLGLRENVYKLIKINFSKLRYSMVIAADSDVDGKHILGLIINLNFCKYRSLELGYVK  
YMRTPIVRVSRGKITKKFYTMDQYKAWCLSTNPQKWKHDYKGLGTSTDAYIKDDTENQ  
VIVIPFLDKDSEDNLELAFHPDKTMRKSWVTSDRMEIGSYEGKQNISEFINAEVYYSK  
YNLTRSIPGEMDGLKISQRKILYGSMLIWKSNKNKVKVSELGSAVSSSMGYHHGVFSLGN  
AIKSMASDYVGSNNLSYFSQEGQFGTRNMGGKDAADGRYSAVKPEWWWPYVYKEDDIPIL  
SMVTDDGKVPVTLPIIPMSLVNGARGIATGYSTFIPCHSITDILSWYEKLTGSVLF  
ELCPWYRNYTGKIQILITLDNKSHRMVTSGSFEMVRKANKDVTRVTELPGRWNHNSYGLWL  
KSKLEKKEITDFDNHSTHLVPSFDIKGFTNPTIANLKLYKTYTMDNMVLLSEGGMPRKYE  
NVTEILEGFYVKRLGYVVKRKEYKLESLNIEINDLTSLSKFIMAVVNEEIIIVFKQKIDDI  
YKKMDTMGFNRDFLKRVP LHKCTKDYISELERKISTMKEYSNELTNTKESDMWLKDLLDF  
RKKYLSVYGLD

>gene\_1488|GeneMark.hmm|103\_aa|-|34|345 >NVVL01000065.1 Rickettsiales bacterium isolate NORP64 Contig\_source1382A\_24665, whole genome shotgun sequence  
MKDCETQTIPIQLHPTPPPLTTNQTQQTSPPSLPTPPQTDESIINYESDHNPPLNPIPE  
VIRAGQRSLSVSKYGISCSNVEKTSVHSYNSGKMVHKHNIDI

>gene\_1489|GeneMark.hmm|78\_aa|+|886|1122 >NVVL01000065.1 Rickettsiales bacterium isolate NORP64 Contig\_source1382A\_24665, whole genome shotgun sequence  
MSALTIRLPDEILDEVKRSKALHISRSEYIRLSIAKMNGICEDERRAKLMETSHRVRK  
ESMRINSEFAKVEHDPEA

>gene\_1490|GeneMark.hmm|119\_aa|+|1106|1465 >NVVL01000065.1 Rickettsiales bacterium isolate NORP64 Contig\_source1382A\_24665, whole genome shotgun sequence  
MTRKLNLEIWLADLGSKLGTELGLRPVLIQNTLLDANHPSSLVIPLTTNLIDDAEP  
LRIRINAQGKLD RSDLLIDQIRAI DNTLHIGALVLCNEDFMKKVYQAI AEVIGDKNS

>gene\_1491|GeneMark.hmm|129\_aa|+|1493|1882 >NVVL01000065.1 Rickettsiales bacterium isolate NORP64 Contig\_source1382A\_24665, whole genome shotgun sequence  
LSNAILTLDLRIWLHLGCSEQERHQPCVSDISITFPKGLKGTSSDDINDSFCYGEAT  
KLIKETISSKPYNLIEHVASDVHEVLLGSLREKGFPEASLLVKITKLSPPVLDIHGGVSF  
TYAPAGGRA

>gene\_1492|GeneMark.hmm|444\_aa|+|1891|3225 >NVVL01000065.1 Rickettsiales bacterium isolate NORP64 Contig\_source1382A\_24665, whole genome shotgun sequence  
MIYISLGSNMGNRLSALRDAARLIKTNILTHSYESIETKALLKEGAPASWKNPYLNMV  
IAGKSDLSVPKLEALKNIEEKIAGSRYKERWSPRVIDLDILIYNDQTIQAPGLNIPHA  
LLNRDFLLHLLALMPEEYMP LIQTNSSTAPSDGAMVRADEYAHGALEYAGLFDKSFSLAV  
PIAGILNVTPDSFSDGGKNSSPEMAIENAKQMVLDGAEIIDIGAQSTRPGGIEIIGAEKE  
YERLAPVLDGLKDLDAKISIDTYHPALIRRLKEYKIDWINDVTGNLEDDILQEISAAGC  
KILTMHSLVPPSPANILPHAQEGGAILLKEWGRGAFERMQR LGFSAEDIILDPGIGFG  
KSIYQNLALIRQMQLQELQELGVSILVGHRSKSFIFGLSTAPAKERDIETMVMMSGNLAS  
KVDFIRVHNVDHHRALIANQLSL

>gene\_1493|GeneMark.hmm|179\_aa|+|3203|3742 >NVVL01000065.1 Rickettsiales bacterium isolate NORP64 Contig\_source1382A\_24665, whole genome shotgun sequence  
LLINCHYNYGIVVMSRKIIGIMACTNKGVI LNGAIPWRYPEEFLHFKNTTDGQIVVMGR  
RTFDELANL DLLSSRDNI VFTQNK SLLKSKMAENIRFISSLEEFKLTLPDKKIYMIGG  
AKIVELFLKNDMIDEFLTKIHKEYDGD TYFPLDLMKNWDSECVDTREGYSIYSYKHKN

>gene\_1494|GeneMark.hmm|223\_aa|+|3752|4423 >NVVL01000065.1 Rickettsiales bacterium isolate NORP64 Contig\_source1382A\_24665, whole genome shotgun sequence  
MNFLDRLHKELDQYHLLKHPFYQAWNEGELSVDTLKIYKEYYGHVAAFPRYISAIHSRC  
ENIKDRQV LLENLIDEEQGEENHPELWLKFAEGLGCKREDCKTQELDSTHKLVD EYFDIT  
RSSYASGLGALYAYERQTPAVAKSKIDGLKFKFYAINDEDTLKF FTVHMVADEWHTTECAQ  
LLEKMDAENQELAMNGAVNGAKLLWNFLDEM QEVHLGNRALAS

>gene\_1495|GeneMark.hmm|302\_aa|+|4676|5584 >NVVL01000065.1 Rickettsiales bacterium isolate NORP64 Contig\_source1382A\_24665, whole genome shotgun sequence  
MAKKRQVHSDDIIDAAQTGKNNRLLSAFVFKRFQIDYDS DAPEDEDERYDSL MCDALFYA  
ARNEQDEAIKILLNAGYTDISGLEHYSYK KIRQLKDEMPLPLQSVDSRDVIYAAQDGGN  
NELLLAFVSSTELQIEYDS DAPEDEDERYDSL MCEALWHA AFNEQDEAIKILLNGGYTDI  
SGLEHYSYK KIRAGLLEELSIKLF TAARSGRNLELLSELVQSELGFSESELRKVIEDMI  
EIAAFNSQQGALTRLL EGSNIDVSSFGVLVENPAVGKTNPAVEKTLSTLGDASSDVDEDA  
LG

>gene\_1496|GeneMark.hmm|294\_aa|+|5693|6577 >NVVL01000065.1 Rickettsiales bacterium isolate NORP64 Contig\_source1382A\_24665, whole genome shotgun sequence  
MKNYLNQIKLSILIGIMVFIGSFVFKANAQIVQASSVNEIKKYTSQSQYKGEDTLVLFDI  
DYVLLTPRDAVLR YAGENN NYRSKHFKAILKDFQGKEIVL DKS RMPMAEYLISQVLSSK  
VELVSQDMPSFVNRLNAQKTTVVGLTSNSSGKYGIVQNEAELHLSRLKSLGYNFKDNGNL  
LKGDFPQYVSPVIFTNKTDKGM LLLGFLKQLSKSYKNIIFIDRLKNLISVQNALKDRQI  
NYIGINYTELKNKNELLNQDIADKQFQLLSQEHIWLSDEETQARLNAKSNQEA K

>gene\_1497|GeneMark.hmm|188\_aa|-|6622|7188 >NVVL01000065.1 Rickettsiales bacterium isolate NORP64 Contig\_source1382A\_24665, whole genome shotgun sequence  
MQISVSGQQMSVGASLQEYVKERAVEVVS KYFENAPSARVSFSKQGRVFC DIMVNDGTG  
RGMVIKSNSSGDEVYNSF DAAIIKIEKQLRKYKSKLKDHHKRMKVSQITPESVKYIIAPT  
SVAEELVEDNPVIVAEKPISVLPLSVSDAVM KMDLEDLPALMFENAKTGKMN VVYR KDG  
NISWVDSK

>gene\_1498|GeneMark.hmm|450\_aa|+|7399|8751 >NVVL01000065.1 Rickettsiales bacterium isolate NORP64 Contig\_source1382A\_24665, whole genome shotgun sequence  
MTSKTKKKKPAKSKDLKHVQDHYLDYPYPERNPEEEKTRLMKVYGDYLGGEINHWLFEGKE  
DFKKGFRVLIAGGGTGDSTVYLAEQDKDADVVYLDVFSKNSMKIAQERAKNRGLTNIKW  
VNDSILNLPGLGKFDYINCTGVLHHLLESPDAGLKCLTDSLTERGGMNIMVYAEYGRGTG  
VYQIQNMMNLVNDGVKSRQDEVKNAWTMINSLPNTNWYSRGKDLLADHVKFGDIGMYDMF  
LHKQDRAYTVPQLYEFVENAGLNFVEFNPSHRVMLKIETYVKDPEMLKKIKAMDKSKQH  
AICELMCGSIIKHSFYVSKKKKPIAKFSNLDNTPYFYTVKNVPTQIADYIKENPQIVGGV  
VNFSWTSDFLGKVTINIPASKYTEHLFRHMAGETKSFKEIFKAIEKDLGEKIDSSVLMTE  
VNRILPMMGESGSLLRDKKVSIASSMISS

>gene\_1499|GeneMark.hmm|591\_aa|+|8771|10546 >NVVL01000065.1 Rickettsiales bacterium isolate NORP64 Contig\_source1382A\_24665, whole genome shotgun sequence  
VSESTKNKSANGKYWSARSYDENFIQELSRFLGISDFLARLISVRVSSPADAQDFLEPKI  
KSLLPDPFHRLDMEEAVTRTMLAINSGEKICIFADYDVDGATSSALLKNIFREMNVESI  
YVPDRISEGYGPTIQGMEKIHASGAKLLITVDCGSVAFEPLHAACLGMDEVVIDHHISM  
DELPKSVAVINPNRLDETSECKNLAAGVGSFLFAVALCSRLKESGYFKEKNIPPPNLMKQ  
LIDVALGTVCVMLLSGLNRAFVTQGLKVARARKNIGYASLCDVAEISEALSCYHLGFIL  
GPRINAGGRVKGASLGANLLSTGSKLEADKISAELDRYNEERKVIEMTMLEEASEMAKNQ  
EDSPMLFITGQGWHPGVIGIVAGRLKEKYTKPVAVIALNDGIGKASCRSIKGVDFGCTVI  
EAKQKELIAGGGHSMAGFTVNEEKLNLDLQEFFNKEFAKLAGSDAHLREHYDADLTSS  
AATLELLEEISKLEPFGNGNPSVFRFSNLYVLKADIVGTHLRIMFSPSRDAYGSKPLT  
AIAFNAAGTELAECILSRKPHTLSVFGTLKVNKWQDRETVQLQLRDVLIIE

>gene\_1500|GeneMark.hmm|34\_aa|-|10577|10681 >NVVL01000065.1 Rickettsiales bacterium isolate NORP64 Contig\_source1382A\_24665, whole genome shotgun sequence  
MQIIYIDKEFIDFYKLSPOGENIPYFYKLRPQG

>gene\_1501|GeneMark.hmm|226\_aa|+|10965|11645 >NVVL01000065.1 Rickettsiales bacterium isolate NORP64 Contig\_source1382A\_24665, whole genome shotgun sequence  
MNTTDNTVDTTTEIETRPDGTREKRTVHLKNSGLSREEADSTMTKSGEPNQVASTLAGG  
ARALGSIVEGITGAPDTVLSLAGKAMDLMSSGKKDDPELPPEPESPGVPDFDSARSSLY  
GNPFDSDSPEIAPMPRAVVSRRGSMFDIPDEVQVQAAQIRWQQAQHSRQSQHVRPPAT  
PSDRRGSIVEDAIFEIRDSLIGNIVGQMGGDLLGGSSDYAEPPEVT

>gene\_1502|GeneMark.hmm|185\_aa|+|11811|12368 >NVVL01000065.1 Rickettsiales bacterium isolate NORP64 Contig\_source1382A\_24665, whole genome shotgun sequence  
MEPVSTITLILVAGAVISGCGWHHHHSRNQETHHETTTEKTTITTPGGTVTEKTAVTI  
EIDTDITSEESSGEGAEGDPEVAKGLVNIAGNLLAGGGVFDVAVAGVGELFGSGDDDDSDSD  
AEAPMLDAPFRSDSGEPGEPNAARARLTGIFQLVIDNPGVLDANGDSEGVMGDSTAALP  
SDAIV

>gene\_1503|GeneMark.hmm|530\_aa|+|12573|14165 >NVVL01000065.1 Rickettsiales bacterium isolate NORP64 Contig\_source1382A\_24665, whole genome shotgun sequence  
MKIMKPFIALSCSLLLTLAWGSANAKDDVSTKSHASTSAKASIKDATNINPGAITRAKP  
KNIKXSEDKLEIDDYIAMCKQDLQFVRSQMKKNSAAYANKIDKEFHRWFKEGNKNTLKI

SKIGDLDDCYAIKYYINGFHNSHISIRGYIALPSEEYPGLLSAKKGGKGHYIYKHPALK  
YLKNVNI GDELTHINGIKIDRYYKDFLLPFYANDKSELTELESASIYALIVDGNRFKPSPR  
RITLKQKQNKDINIDLKYTELKGAAVEAAKKIKQPDRSAPFKVELVSNGVWIRIPSFPPA  
RNEAIYYTGMLSMKNDLAKEDYILFDMRGNRGGASKWSRPIIRNLWGDAFIKSLGKKHD  
YNKKWQKNLRVSAENFSPFKKIYSPAASKSYASLIKRRKKDFLKKWSIYNDKENLYTNLD  
SKPFNAKIYVLTDFCRSTCWKFVNELKQIPGVTHIGEETTIQSIYSYAKRERASSEHFD  
FFYPTQIRVKPSYKLGALVPSEIYKGDFRDEASVIDWALSITEKEDEDF

>gene\_1504|GeneMark.hmm|154\_aa|-|14162|14626 >NVVL01000065.1 Rickettsiales  
bacterium isolate NORP64 Contig\_source1382A\_24665, whole genome shotgun sequence  
MIISSIQEFYEFFQNGMPILSIDYGGKLGVAISTPDHSFIMALQMISTESEKEKFRQVL  
NIAEEKNICAIVIGWPVNMDGSKSDQTLIVERFAARLEGRTKLPIFLQDERLTSKAADNL  
LKKFGVKRDRNSRDDMTAASMIETTLESIKRL

>gene\_1505|GeneMark.hmm|431\_aa|+|14642|15934 >NVVL01000065.1 Rickettsiales  
bacterium isolate NORP64 Contig\_source1382A\_24665, whole genome shotgun sequence  
LVYKKVSVFKFTKIQLDVKLIKASLVFALLYCILFNSAVFVYKFEFYQANLFTASLELTK  
DFIYLTVTLMFFFGLSTHRILFIVGSILLFVTGAIASYYLFFFSISPTPSMMPAVFCNP  
AADASELISTSLIVWISFCLAICLYGIYFKIQTSKSFITRFLSFLCILFVVSNILLPKF  
SFLKTYFPVQYLHNSYIFLQGGQNEPLREDINTKFSFVDKSDDDVTGVLVIGETARYDKF  
GINGYGRDTPNLSELDLVSLKARACATSTYYSVPCMLSRYTEKDIDLVETESSFLSVLT  
RLGINTTWLGTQTCTKYKNTQNYSFYDEVNLRVIPGGSLIFKANCHEDGKMLPYIKKNIE  
SHNKNFLVLHTTGSHWNYARRYSEEFKFTPSISKTKDPFSCDLEKLNKSYDNSMLYTD  
FFLSRVIEMLK

>gene\_1506|GeneMark.hmm|954\_aa|-|1|2862 >NVVL01000066.1 Rickettsiales  
bacterium isolate NORP64 Contig\_source1382A\_24681, whole genome shotgun sequence  
MQNKPCNPHAIGVLLVFGILLTGKCRYMLFGVEIGLDMGIVIGFLVLTLLVGMGHGKSVK  
TIKDIALGGRNFSTAALTATIVATWASGSGFFITMSKTYSDGLIYMFSRFGIGLSFLILA  
FVLVPRMGEFLGKTSIAEAMGDLYGRHVRIITAIAGTLGALGSIQVQFKVFGSMFSYFLH  
VPDYIATIAAGMIVTVYSAFGGIRAVTFTDVLQFGAFGMIPIIGFIVWNDFYSGFTIV  
QTASDSSFNLVEIFSINNASLLEMGMVFFYFSIPTISAPAFQRIAIGNSISQVKAFLIG  
GVILILIQVMTAWIPFLHTLDPSEAKHILGHIITTYSPGLKGLMIVAVLALAMSTAD  
SRINASSVLFTNDICKLLIPNLKKEMFVSRFSFALGIGGIALSLES DLLAIMLLASSF  
YYPIITPPFLSVFGFRSSAKAVLIGIAAGFATTVIWKILPISFVSQSVMVGIFFAMLM  
NTAFLFASHYLLKQGGWVGKIDSSYIDKQKIIRREKWAAFVSKAQNFNLINYIKTRPVV  
EDSAYVTLGAYFLIFTFTSIYSTHAEMLKANGDIIGVIYQIMIVSSTMMGMYPWPLSIK  
TQIKQMVMRVWYPLSIFYMLIVFSTFFVLLNEVNNMHYIMFAVNMIVSVVLLGWRMALGM  
IVGVYMGVQFYKYYAGVEYLDISIGSPQFILIYSSMFVVVILLIFLKPQEHQKQTEYK  
VGELSDEVGTLVAVVSSRDGQISTLDTKVSGLERVDHYTERATDHAKEVERLGATAQKI  
LNNVNHELRLPVGVMNFAEILHDGLGKFSDEQLKMLSKEVYKNSNRLSTMILNMLDLAT  
LQAKKIELQIKLANFSELVEERLTVCRKIYVEEKPLKFITKIEKNVMVPMDANYIRQITD  
NLMINAINFSEKGNISISVVEQTNFVFTTIQDQIGIPLSELYDVFTPFKMGSN

>gene\_1507|GeneMark.hmm|76\_aa|+|2857|3087 >NVVL01000066.1 Rickettsiales  
bacterium isolate NORP64 Contig\_source1382A\_24681, whole genome shotgun sequence



LHKYEDASTNSDPGYSRESGLDGGFSLPETLDYSNSKNPFSGRALRELLQLFAARHGMRQ  
GAYHRFQGGKLSAEVSP

>gene\_1508|GeneMark.hmm|203\_aa|-|3320|3931 >NVVL01000066.1 Rickettsiales  
bacterium isolate NORP64 Contig\_source1382A\_24681, whole genome shotgun sequence  
MIDIELLIDGHKRFRKKHFDKDKKLYQELATEGQTPKTLIIACSDSRVDPAIIFDADPGD  
LFVIRNVANLVPPYQPMNESYHGTSAALEFGVNNLKEHIIVLGHSGCAGIKSLCDHDDE  
GSKKFSFISSWVNIAKEAKEMAQKGGKSSVEEMYSLCEKESILTSIENLLTFPWIKEKVK  
NNTLALHGWYFSLNNGKLLRVKY

>gene\_1509|GeneMark.hmm|459\_aa|-|3928|5307 >NVVL01000066.1 Rickettsiales  
bacterium isolate NORP64 Contig\_source1382A\_24681, whole genome shotgun sequence  
MNELSCFKAYDIRGKVP SQINENLAYKIGVALHTMLAPKTVIVGYDIRLESPKLAESLIQ  
GLTDSGVGVINIGLCGTEEVYFHTFHKEQDVCAGVMITASHNPKGHNGMKIVGKGSRPL  
STEDLKKLQEHVRALGPDALPYSEKGLKGTETIDEDKSSYITHLLEYVDISKLPLKIVV  
NAGNSAAGVVIRLLEKHLPPFEFIYMNDTPDGNFPNGVPMNPMIVENRTATSEAVIAHKADF  
GVAWDGDFDRCLFDEQKGFIEGYIVGLLAEIFLQKSSPEKIVHDPRLVWNSIDIVQAA  
GGVPVMSKSGHSFIKEKMRQENAIYGGEMSAHHYFRDFAYCDSGMIPWLMVAELISSARE  
NLSALVDERVAAYPCSGEINYRLDDIQAVIGKIEQYFLPKCKFVDYTDGLTIEFDDWRFN  
IRSSNTEPLMRLNLESRGDVDIIKKRVEEIESLFGGEEK

>gene\_1510|GeneMark.hmm|208\_aa|-|5433|6059 >NVVL01000066.1 Rickettsiales  
bacterium isolate NORP64 Contig\_source1382A\_24681, whole genome shotgun sequence  
MLLELKKRYAEKKAKKLALGGLLEFTEERLSNELKILQVHGASPEKIQLFQEWMIIEVYKVK  
ATEAAGNKSYWFNKNITDEVLSMVSILLPLELEAAFTANLDIELASMEEQILKFFKEC  
QEDLGLNNDYSKIFQKELHDILGVDRKLILESFREGLDLSLHKASPLPTPDWQSYLDAEF  
GRLCESASLYLYKPHAPEVEIGGMDIDS

>gene\_1511|GeneMark.hmm|89\_aa|+|6357|6626 >NVVL01000066.1 Rickettsiales  
bacterium isolate NORP64 Contig\_source1382A\_24681, whole genome shotgun sequence  
MIRKEPVMALRRNLGQVLNEVEYKHDTIIITRDGHASAAIINMNLFEKIRQMKNRFSQLT  
RELQSAFSDLVEQEKDDLIDEALLEARIK

>gene\_1512|GeneMark.hmm|831\_aa|-|6676|9171 >NVVL01000066.1 Rickettsiales  
bacterium isolate NORP64 Contig\_source1382A\_24681, whole genome shotgun sequence  
MKLVIVESPAKAKTINKYLGTDKVIASFGHIRDVPSKKGSVLPEEDFSIKYEISERSER  
YVDEIVKYAKQSDEIYLATDPDREGEAISWHITEVLKEKKIITDDSKFKRIAFNEITKKA  
VLAASPRKIDLDLVNAQQARRSLDYLVGFTLSPILWRKLPGCKSAGRVQSVALRLICE  
REDEIERFISQYWDITLDMLS DAGKPFSAKLSHVDGKKLEKFSITNQEGADDIAARLKT  
QEFSIASITKKQKRNPAAPFITSSLQEQASRKLGF GAKKTMQIAQKLYEGIDIGGETTG  
LITYMRTDGVTLAADAVTSIRELIEQKYGD KYLP AKARIYKSKSKNAQEAHEAIRPTDII  
RTPEELKGRLDNDQLRLYDLVWKRTIACQ MENVIIDMVGADLITADKSFTARATGSTIAF  
DGFYK VYQEGLDSDKDEKSKMLPPLAEGEDLSTKKINPEQHFTEPAPRYSEASLVKSLEE  
LGIGRPSTYASISVLQERNYVTVEKKRFFPNDLGR LVTAFLVGVFFEKYVQYDFTADLET  
DLDKVAEGTIPWKNLMSNFWDFNKNVEK VSEQKIGDVIAYVEKSLDFHFLFGKEGTEEYK  
KNKKCGTCDPGDLSLKLKGYGAFLACSNYPDCTFKKQVSKGDSNEEAQTIIDNTKDLGQD  
KDGKTVYLKKGYPYGWYVQAGEAESKDKPKRSPLPATV KPDDLPLMAIKLLSLPLHVGN

HTETGEEIVMGIGKFGPYLKYQNKFTSIPRAIDHFAVTLEQAVELIAEKAKKDAAKKGAP  
KVVVAKKAVAKKVAPKKATPKKAGVKKVGAQVAKKAAPKKVAPKKAVAKKS

>gene\_1513|GeneMark.hmm|379\_aa|-|9177|10316 >NVVL01000066.1 Rickettsiales  
bacterium isolate NORP64 Contig\_source1382A\_24681, whole genome shotgun sequence  
MLDNLFVRNKASTYSDETIDILRLIRSENVGSRITYLLIKKFGSARNALENIGDFSLRGG  
RSKPIKIFPKSSAEQELEKLRKNGAHLITHKDYNYSQLLAHIPDFPPVISYKGNISLLNS  
QKIIAVVGARNSSLNSRSFAYKLSKDLVDAGYVTASGLARGIDTEVHKASGAKTIAVIAG  
GIDHTYPPENKKLQEYIEKEGLLAEIAGSKPLSQHFQNRNRIISGLALATIVIEASLK  
SGSLITARFALEQGREVFVPGFPLDPRCMGSNKLIKDGAQLLESSEDVIANVPLYKKS  
EESKTYSNLKPAPDAANIASSDRENVRTLSSMPVYEMIADETCLSLPIYTICL  
LELAGKIVRYPDNKIALLY

>gene\_1514|GeneMark.hmm|200\_aa|-|10334|10936 >NVVL01000066.1 Rickettsiales  
bacterium isolate NORP64 Contig\_source1382A\_24681, whole genome shotgun sequence  
MNPFIGKKAPDFTAKAVMHNDIIEHDFNLKSHLKGQKGVLFYPLDFTFVCPSEIIAFNN  
RVAEFTERNTKIVAVSVDSHFSSHAWRSIPANKGGIGNVQFPLVADLNKEISTAYDVLNE  
DSVSYRATFLIDEHFNIRHFLINDLPLGRNVDETLRMIDALDHHNQHGVEVCPAGWQKGDQ  
GMNPTHQGVADYLAVNAEKL

>gene\_1515|GeneMark.hmm|335\_aa|+|11197|12204 >NVVL01000066.1 Rickettsiales  
bacterium isolate NORP64 Contig\_source1382A\_24681, whole genome shotgun sequence  
MQFIDESKIYIKAGNGGGHGAVSFRREKYIDRGGPDGGDGGRGGSIIFRSNSHLNTLLKFR  
YQRHFKADNGEYKGRNKTGKSRDPVILEVPLGTQIFSEDGLLIHDFVEDQEDFEILEG  
GKGGLGNSHFKSSTNQAPRKRIDGETGAEMDVCLKLLSDAGLIGLPSAGKSTFLSTTT  
SAKPKIAEYHFTTLKPLGVVYVSEEEFVLADLPGLIKGAHLGSGLGDRFLKHIERCGVL  
IHVIDGLRDDIAEDYKTIREELESYPLLKDKYEIICLNKIDAMGEEEEILEKMQILEELT  
GKKINPISGYTKNGLDIVLKQALRLIKEDDIEDII

>gene\_1516|GeneMark.hmm|387\_aa|-|12586|13749 >NVVL01000066.1 Rickettsiales  
bacterium isolate NORP64 Contig\_source1382A\_24681, whole genome shotgun sequence  
MSRSSNENITISTVSVAYMVAQIRAKQLASKASQDELLRHIVEYLESEAAAIEITGASFA  
TIMAELVETELKHSYFEDLELVGYPIKYNKTKLILEMVQSWVSTSDDSLMDITNNTLH  
NGQGNTVLSELPRQLAPSQVSSWGNENPVVNTALLIGASHFTQDDLFTGAATFFPFFD  
PTHVVDGYSNIFGASNGMILVGDYQYGGHRYFSNPAHGLKQQLFGAEDCSSAVAKATGLG  
KYVVEVTTTSLREAYTSPKWGGHYTAITSTYQEEIDWAKVQPGDIYIRGGHTAIIASAPD  
QHGFETLEFNDRDIESNTKHKLLGGGMYHRTTDPQKDIYFLCQPAKDFKESCSATDLLQL  
IDQRYEEMYGDNPVVDVAGDCGIFLQL

>gene\_1517|GeneMark.hmm|636\_aa|-|13888|15798 >NVVL01000066.1 Rickettsiales  
bacterium isolate NORP64 Contig\_source1382A\_24681, whole genome shotgun sequence  
MDVTVAAYYIKEEKISYSEYIDNMNIINKAVTEMQKNLMQDYGVYKTRFGILVSSIQKI  
IAIDQEFKDLLFFMGLINYKNISRDLINFKNEKIVNNFIAYLKEFSIITEERKNKNKNI  
DNFTILKSSNIIRHYLQQLFLGECRVAARGAKILQYLFNEKKLSSIDRDNYEHI  
EAFLQNKDLLNDILAYYSKILGIYYVGNENYDKAKKLENALEYNLNKKMYGKEIANI  
SVNSGELYLFSGGYEKAKKSLEIARQFYSQNIIEYECVLSWTYGLMGYTCRALEQYEQAR  
IYLDKSLAIHSGCSNFDKTRLLTYLGSVHRNLGNYDLAITLLTSANLIIDFYGKNHFK

KYWIDNYLGQTYLCKGEYLKAKELLEVAVIKYQNLYGKKDKRTAEISIWLGTLKSYIGEY  
AESQAILSFAHKRFVKIYPENHLKIAWCATSLGEVYRQLKEYDLSQRYLEQAQAIIFSLKL  
AKNNIKIAWNTLNLGLLYRDQNKLVKAEQYFQKSFDIYMKNNGLQHKRTATVLAELGYIK  
FLKGDAAAGSGMIKKALRIMVTKNYTRRYIALIQLAEINFSKLNLSDEEKRNITNQTL  
LYMNQALEIVTNNFPSSTCSEEIYKMKQYQNRLP

>gene\_1518|GeneMark.hmm|262\_aa|+|45|833 >NVVL01000067.1 Rickettsiales  
bacterium isolate NORP64 Contig\_source1382A\_24823, whole genome shotgun sequence  
MKKILLTTAAAVLATSSAYASEADTFVGVHAGMIKPTDEKFGGMKYKSSAAGFAELSV  
NYAIMDNVRVGAASFHFNPKYKASWEVKHADIDGGTFKHILSKTKAAAASVKAADLAE  
PDAKFKTVLKAKFSTFLVNGFVDVADLGAAKIFVGAGVGLSRTSAKFKKTSTTVATKAIP  
ANTATNQKEVKVDVLTGPTKSGKIKSKTNFAYALYGASTEVPGINAELAYSFRGFGK  
LKDVKKASLKGHNVSQVGRFDI

>gene\_1519|GeneMark.hmm|96\_aa|+|1954|2244 >NVVL01000067.1 Rickettsiales  
bacterium isolate NORP64 Contig\_source1382A\_24823, whole genome shotgun sequence  
MNKFIKSLVNKEQDSFLTQILDILSPMYNLSTETSESGVVSIFKGGAKFAIIEGETMKLA  
DKNGSFTEIDAPIKSADALLQVATQAYWIAIKNIAS

>gene\_1520|GeneMark.hmm|168\_aa|-|2502|3008 >NVVL01000067.1 Rickettsiales  
bacterium isolate NORP64 Contig\_source1382A\_24823, whole genome shotgun sequence  
MSESPNFAIGDKVVYPSHGVGQIIEIESQDIAGMQIEVYVISFPQDKMTRLRVPVSRGAAS  
GLRTLVTKKDISEVYNILNSKPKRGNKMWRRRAQEYETKINSGEIDAVAEEVVRDLYKNVD  
NDRYSERTIYESALGRLAAEIAVLEDISSQESTEKLVELLKEKLVAA

>gene\_1521|GeneMark.hmm|644\_aa|-|3095|5029 >NVVL01000067.1 Rickettsiales  
bacterium isolate NORP64 Contig\_source1382A\_24823, whole genome shotgun sequence  
MLISSLFASAALNSIDFGSLPAKSGGIVGVNVEQFTLSFSQILPYKQFINPGYITLAVIF  
FILALGVRLRVYKRIVFGFLGFLRLISATGILQKLSIDNGKAYYASDEFYSYAGGDEEE  
ASPFATRRSAKPQRRARQKSRGDSNDMYELPSVDLLDDEKHQGAKPQTQAMLNENAEQLL  
AVLKDFGVKGQIIDVRQGPVVTMYEFEPSAGTKSSRVIGLADDIARSLSAIATRIAVIPG  
RNALGIELPNKNRMFFRLKDLVKSDEFQTSDISPLILGKDLAGVPLVADLAKMPHLLVA  
GTTGSGKSVAINAMILSLLYKYPDECKMIMIDPKMLELSAYDNIPHLMTPVVTEPGKAV  
VALKWAVKEMENRYRLMSHLGVRGITNYNIRVQEAANKGEVLERRIQTGFDPETGKPTH  
TVPIDMNKMPFIVVIVDEMADLMIVAGKDIESSIQLAQMARAAGIHIIMATQRPSVDVI  
TGVIKANFPSRISFKVTSKIDSRITLGEQGSEKLLGMGMMLYMGNSSKILRVHGPVDDK  
EVERVTNYLRSTGTPEYISAVTEADEECGDDSGENFSSDDGENDIYTQAVNIVRLERKAS  
ISYIQRSLRIGYNRAANLIDEMEKNIVSSPNHSGKREILLPED

>gene\_1522|GeneMark.hmm|97\_aa|+|5028|5321 >NVVL01000067.1 Rickettsiales  
bacterium isolate NORP64 Contig\_source1382A\_24823, whole genome shotgun sequence  
MAIVLNVAQSSFLRNKIHAQEMQHMDIINADQPQNWKSISARYDPKYNRRLLGSLSVNK  
LNDGSCGLYEARETTLASASTNNIVDLDLLCAKNFFI

>gene\_1523|GeneMark.hmm|119\_aa|-|5432|5791 >NVVL01000067.1 Rickettsiales  
bacterium isolate NORP64 Contig\_source1382A\_24823, whole genome shotgun sequence

MSLFEFIVVLIVALLVVKPEDLPKIVKFKQMQSFITNTKKEIISQISIDDELEEIMQDS  
SSPNLNKEMEQVNYYLEKISNIGPEYEGEYSLAAIKKHLYLKVKEKMADSNSAKQDSNS

>gene\_1524|GeneMark.hmm|555\_aa|-|5837|7504 >NVVL0100067.1 Rickettsiales  
bacterium isolate NORP64 Contig\_source1382A\_24823, whole genome shotgun sequence  
MSYQYVYVMKGLSKSINGKEILKETWLSFLPGAIGIIGHNGAGKSTLLKIMAGVDKEYD  
GEAFIADGVKVGYLEQEPQLDPTKNVFNIMEGLAEKKALIDEFNEVSAKFAEEMTDDDEM  
NDLLARQGDLQEKIDACDAWSMEREIEIAMDALCKPAKDADVTKISGGKRRVALCKLLL  
EKPGMILLDEPTNHLDAESVSWLENYLKEYKGAVVAITHDRYFLDNVAEWILEVDRGKCV  
PWHSNYSAWLQEKQAKLASEEKEEGDHSKLLKRELEWIQQSAKGRHTKSKARINAYQELL  
NKKRDVGNNGSGQIIVPNGPRLGELVIEVKNISKKFGDKNLLTDFSRVPRGAIVGIVGPN  
GAGKSTLFNMITGKVKPDSGIINIGDTVKLG YVDQSRDHLDDSKNVWEEISEGLEVLDLG  
GMSMKSRAYCSAFNFKGAQQQKQVQQLSGGERNRVHLAKLLKEGANVILLDEPSNDLDVD  
TLRALEDAILDFAGCVFVISHDRWFLDRIATHIIAYDQDSNATWFEGNYDDYHNYMTNIV  
GQNTKNPKYKHKRLA

>gene\_1525|GeneMark.hmm|216\_aa|-|7530|8180 >NVVL0100067.1 Rickettsiales  
bacterium isolate NORP64 Contig\_source1382A\_24823, whole genome shotgun sequence  
MKLFLDSVDSAEIKKYSALGIIDGLTTNPSLMVKSIGFYETVSELTSLVKEDVSIEVIA  
KDFDDMVKEGERILDVAKNIVVKLPITWDGIRACKYFADKGRKVNMTLCFSANQALLAAK  
VGATYVSPFIGRLEDAGEDGLGLIAEIREIYDNAKFETKILAASIRTVAHVTDAAALCGAD  
YATLPANIMDELVKHPLTDKGLAKFDEDWAKSGMRI

>gene\_1526|GeneMark.hmm|282\_aa|-|8185|9033 >NVVL0100067.1 Rickettsiales  
bacterium isolate NORP64 Contig\_source1382A\_24823, whole genome shotgun sequence  
MRNKALGRGLSLLKEEIVPIIVSQSENSLSDLEASDNQPRKYFDEGKIKELADSILS  
HGLVQPIVVNRVTSGKYIIAGERRFRACKIAGLENPVVIKDLNNDILEVALIENIQR  
QDLTAIEEAFAFQKLMDEYGYTQSELGVAVGKSRSHVANLLRLNHLPSIKLMVNHGQLS  
MGHARCLIGLENAEELAKKIVANDLNVRQTEELVSSKRKNDRAPKMQGKESAPVDEDLVL  
LGQSLSEKFGVKVVVENSWNNGGKISFHYGNLEELDSILTGFN

>gene\_1527|GeneMark.hmm|255\_aa|-|9042|9809 >NVVL0100067.1 Rickettsiales  
bacterium isolate NORP64 Contig\_source1382A\_24823, whole genome shotgun sequence  
MSAKIVSVVNQKGGVGGKTTTAVNLATIFAIMDKKTLIDIDSQGNSSSGLGIEQSQRKVT  
SYHIFCSLDSVKNVAVIQTEVPNLSVIASNTNLAGVELELFGQEGHEFILKNALESIKDDY  
DYIIIDCPPSLNLLTLNALVATNEIIPMLCDFYSLEGLSHLLKTVEIVEKLNPNQIKIG  
GILFTMYDKRHKLTEQVERDVRSLGAMVYNTTIPRNVRVSEAPSHGKAAVIYDHHCSGA  
RAYISLAKEIMSKET

>gene\_1528|GeneMark.hmm|194\_aa|-|9806|10390 >NVVL0100067.1 Rickettsiales  
bacterium isolate NORP64 Contig\_source1382A\_24823, whole genome shotgun sequence  
MIDVREYVSRGDVGAFVELLLKWNNTINLISSKTTANVMDRHVLDSLQILEFIGDKDVSI  
IDFGSGGGFPGILLSIAGVRKVTLIESDARKAAFLRQASKISRHEVEVINDRIENVENLE  
CDIITSRAFADLDSVFGYSRNIQVRDKYLLHKGESYSDEMLKAKKHWFNTIVHDSITSN  
RGKILEIRDVEYIS

>gene\_1529|GeneMark.hmm|614\_aa|-|10387|12231 >NVVL01000067.1 Rickettsiales bacterium isolate NORP64 Contig\_source1382A\_24823, whole genome shotgun sequence  
VKKRYSVVVIGGGHAGCEAAAAAARVGADTLITLKPENLGEMSCNPAIGGVAKGVLVKE  
VDALDGLMGRVTDKAGIHYKMLNESKGPVWGPRAQADRELYRAAMFDELTYKNLTILY  
DSVEDITNSVVTKNNGEIECKIILTGTFLSGMIHIGQKQIPAGRDGEQASYGLSATL  
KRDFDKLGRKLTGTPPRIDGSTIDYSKTERQPGDKVPRPFSEMTDNVEIPQIDCYITRTT  
LKTHEIIKANLDKSAMYSGNIEGVGPRYCPSIEDKIVRFSDKESHQIFLEPEGLNISTVY  
PNGISTSFPEDIQREWIKTIPGLENAKIIKPGYAIEYDYIDPRELKPTLESKKVSGLYFA  
GQINGTTGYEEAAQGVISGINAALSALGKSDFILTRADAYIGVMIDDLISFGTTEPYRM  
FTSRSEYRLSLRADNADLRLTPKGI EAGVSSKRQTLFENKLN TIESTKLLLSCNLTTT  
KLAKLGIAIAQDGTKKSAYQLLGLPNFGLTKTEIFPEIASLNPSALNYLKIESQYSSYL  
KROSLDIKMFQEEESY TIPDDVNYS DIQSISTEIKEKLSYHRPTTIGAARRISGVTPTAL  
TAIIYLKTKYLKK

>gene\_1530|GeneMark.hmm|140\_aa|-|12243|12665 >NVVL01000067.1 Rickettsiales bacterium isolate NORP64 Contig\_source1382A\_24823, whole genome shotgun sequence  
MTIEYTF SIIKPDATERNL TGKINSYLETAGLKVAAQKMTILTKEQAE EEFYGEHKARPF  
GGLVKYMTSAPVILQILKGENAIAKNREIMGATNPEDAAPGTIRKDFAKDIEANSIHGSD  
SADSAKREMEFFFSKDEIVA

>gene\_1531|GeneMark.hmm|458\_aa|-|12739|14115 >NVVL01000067.1 Rickettsiales bacterium isolate NORP64 Contig\_source1382A\_24823, whole genome shotgun sequence  
MKLSL FNSL TRKREVFTPINPDLIGMYVCGPTVYDHPHIGNARSVVVYDVL YRVLTHL YS  
KEKVRYVRNLTDIDDKIIARAIEENTSIDELTKRTTEYFHKDMNYLGCLEPNFEPKATEH  
IAEMVDIINKLLSSQIAYQANNHVYFDVSKAKNYTKLSGRSFEDMLEGVRVENSTDKKHP  
NDFVLWKP AHQNDD EAKFQSPFGEGRPGWHIECSAMSHRYLGETFDIHGGGADLIFPHH  
TNEIAQSCSAFPGSEFAKTWVHNGFLT VNHEKMSKSLGNFITVDDLIQKGV RGEIIRLFL  
LSNHYRKPLDYNDKAISDAKMLDYWYRAIEDINPPLVQTPPSVFIETLLDDINTNNAIK  
IINDFAKQAH AATNEDQKLEAVGNLLASARFLALLNTSPAKWFKCEKNEERINILIAKRA  
QAKQLKDWALADSMRAELLSIGVVVEDKPDGSSSWRKV

>gene\_1532|GeneMark.hmm|279\_aa|+|14186|15022 >NVVL01000067.1 Rickettsiales bacterium isolate NORP64 Contig\_source1382A\_24823, whole genome shotgun sequence  
MDEFLNKQETE QINKKATI QMVTFGMITILVIVTLVSCIRIYSNKKEQVLNEMRMESLL  
KTVITDQLNYSLYSVDIIGDHIKSEPRNLIHHTL KSHFASRDFNV LFGWRKYSWMDEN  
FLEIVTSTQGVVSNPRYASFVKD IVENTKTIKGGENKIVFYTSHNSLKGNSLKIIDNIF  
NAKGKYVGS AVLSYDIKTMIRSLDRRKRNSATNFVLLDKNMEVVAQSQPIIENIIDNKGE  
FSNYLKFS LKM HGRDKDLEYLDMFNGLNYFVSKLDEL PF

>gene\_1533|GeneMark.hmm|584\_aa|-|198|1952 >NVVL01000068.1 Rickettsiales bacterium isolate NORP64 Contig\_source1382A\_24987, whole genome shotgun sequence  
MFVSQSVAM LAKLREFARELNAGYIESFAYEEQEKESVFANYIVSALCKYKELLPFLNSV  
YRHLEDCLKTHAARYVKYCS DNNQSTVDVSKFESDVKKIVQLLEKPTKGTEKDKGK DAS  
AQDLKLNLI RELTCTAVKNAQ L LFAEQTQNPEAKASLQAF AIAFSFEHLDADDQNSLFSK  
LLLTKEIWCIDSPEEASKNGIKYNFYHNASALLKLGK KTSADETLMAVIKYLVCESQVLP  
HLSDEQLISLYDRLKNHEWSSDES FLLLSELHKESRFRYSYNRLSDSGYDLLNRFQGYDA

MAHQIENLEFSIVETYLITRRVFFSKLLKLLIKHADNIRGFNLNKNEDLLSVLKKMDIWW  
RDKPEKEKQNYLVMLSGFNKLLKDSGGVRVQKRYTTLDKFTVRALHERYKTLFANIGHLL  
EHDELGMEFLNKIFLQKLTKEFYLPNLANSVKKLRQMDEYQKEVKAQLLELNLIDIFQSK  
GVINEIHSNLSKVAMNSSIKLPSDYIGLLTQQIVAMCTPSQLEALYSPLATQDNLSNAQ  
LYLKSEIKQEIHARGVSIKKMIYSIIRGKKKEYDHLKLNKERMLA

>gene\_1534|GeneMark.hmm|103\_aa|-|2125|2436 >NVVL01000068.1 Rickettsiales  
bacterium isolate NORP64 Contig\_source1382A\_24987, whole genome shotgun sequence  
MAYVVTDECVKCKYTDCVEVCPVDFCYEGDLMLVINPDECIDCGVCVPECPIGAIKEESP  
DLIKWLEINKELSAKWKNITVQKDPLPADKYKDETNKFEKYM

>gene\_1535|GeneMark.hmm|232\_aa|-|2437|3135 >NVVL01000068.1 Rickettsiales  
bacterium isolate NORP64 Contig\_source1382A\_24987, whole genome shotgun sequence  
MIKLLTPNFFIKIEKVLLPILITICLPITIGIGLYYALLASPADYQQGEMVRVMYVHVPSA  
WMSLGVYSFIAICFSALVWQTRMSYILAVAAPIGASFALITLVTGSIWGKPIWGTWWV  
WDARLTSMLVFLLYISYIAITNSGSNILRAERPASVMAIIGFINVPIVKFSVDIWYSLH  
QPASVLRIGGPSIHPSMMLPLMIMFAGFIMYFILMLIMRSRTLMNKIKNNGY

>gene\_1536|GeneMark.hmm|243\_aa|-|3135|3866 >NVVL01000068.1 Rickettsiales  
bacterium isolate NORP64 Contig\_source1382A\_24987, whole genome shotgun sequence  
MELEFIKNKVYYKIFDRTYTGSTGVYSKHKHKDAAKLAEIQQNIDNIKNKYDAQGMVLLK  
QVHGTVNVLGSECSDYPEADGSVTCSEKGVALSIMTADCVPLFASADGAVIGAAHCGWR  
SAKAGIVARIRENMEAQGGKDIKAIAPSIQQASYEVDTDYHQAFIKDDETLKALFIPST  
NKGRYMFDLAGYVKRMLEQENIELKLHIDEDTYSMQEKYPSYRRSHHKGEQYSQSILSTI  
MIK

>gene\_1537|GeneMark.hmm|267\_aa|+|3865|4668 >NVVL01000068.1 Rickettsiales  
bacterium isolate NORP64 Contig\_source1382A\_24987, whole genome shotgun sequence  
MTFSLDIYYDKLSDLGGEYNLLNHQLVQFKSKTKLIPCIGAEIEFYLDGQIDLKMLKTME  
KATGYVLKKEKGNQYEIELPPSNDLASARQIVQVREGVIHAANKLGARADFSSKPYED  
DYGNSMHIHLNFQRNEDSAENKGEDGNKDIEKYARILCHYLPETIEYLPKPEDYRRLDS  
KFMAPTHISYGGNNRTLLIRIPDSKPKRLEHRLPAANANPAHVIYAMLQSIDRGLQHPGE  
ISSLKKTFGNAFDPQYGLERIGARKLC

>gene\_1538|GeneMark.hmm|346\_aa|-|4697|5737 >NVVL01000068.1 Rickettsiales  
bacterium isolate NORP64 Contig\_source1382A\_24987, whole genome shotgun sequence  
MSDDRDQGDVIDAVDVIDTIEEQDASKAQGVRNVQGEQEYLSKPLVSFDYAIKYLKDK  
GDYGVVEGFISTLLKTRGYKDVKIISLMESESNKENVKSKRSLADLVVQDEDNNKYIVEI  
ERNVKDSFVHKSLFNTSRLIVDNLAQREDYTKILKVFHISLLYFPIGNNGSIYHGKTVTHE  
IDTNEKLSVNIKNRDTQEVFDATDIMPEYFYISVPMFNDRLEDEMDDWLHVLYKDEVPPN  
YHSPYMAQIADKLSILKMTKEEREKYSYYQKILHNRDELKAAEFRGESRGIDIGKAEGI  
DIGKAEGIDAGKATLVKMMIAQGNVNNIAKMTGLSEAEIILKLDI

>gene\_1539|GeneMark.hmm|962\_aa|-|5831|8719 >NVVL01000068.1 Rickettsiales  
bacterium isolate NORP64 Contig\_source1382A\_24987, whole genome shotgun sequence  
MQEFIKVRGAKEHNLKNINVDIPRDKFVVITGLSGSGKSSLAFDTIYAEGQRRYVESLSS  
YARQFLHLQNKPNVESISGLSPAIAIDQKTTSKNPRSTVGTITEIYDYLRLLYARVGPVY

SPATGLPIKSQSVSEMVDIVSALPDGTKIYLSPMIRGQKGEFRREFVSLRKHG YQRLFL  
NGELCELDMPKIDKKKKHNEVIIDRLVISDSLGNRVAESLEASLQLGEGLYIEIMSL  
PEKHGTYKDGQRIMLSEKYSCPESGFQLEEVPRIFSFNSPFGACPSCEGIGKESFFDE  
KLIVPDETVSIREGAIVPWSKSSSKFFMDTLASLAKHYSFNLTSPFSTLSSKAKKVLFHG  
SGNEIHKFEYHDDRQAEIIEQPFGGIIPSLEEKYQRSDTAWMRDELARFKSKAPCADCEG  
YRLKKEESLCVKIDDLNIGQVSVKTIADAHKWFENIDSKLDAKQKLIAKRVVKEIQERLKF  
LMNVGLDYLSLSRESGTLSSGGESQRIRLASQIGCGLSGVLYVLDEPSIGLHQ RDNARLID  
TLKNLRELGN TVIVVEHDETM LASDHIIDVGP GAGIHGGHIIAEGTPEQIKNSEKSITG  
QYLSGKKYIPVPDKVRIGSKDKEIVLSGAKSNNLQNLTLRLRLGTFIAITGVSGSGKSSL  
LINTFYKAALKALEPKSKIYPGEYDSIKGLEHIDKIIDINQSPIGRTPRSNPATYTGAF  
PIRDWFTDLPEKIRGYKVGRFSFNKGGRCACQGDGLIKIEMHFLPDVYINCDM CNGQ  
RYNRETLEVKYKGKNIADVLSMTVEDATDFFEKVP AIYEKLVTLKEVGLGYIKIGQSATT  
LSGGEAQRVKLAKELSKRSTGKTLYLDEPTTGLHIDDIKLLTVLHKL VNKGN TVVIE  
HNMDVIKTSDHIDIGPEGGHRGGAI VVQGNPDTVANCKASHTGKYLKEYLKN SPKDSAF  
WK

>gene\_1540|GeneMark.hmm|224\_aa|-|8913|9587 >NVVL01000068.1 Rickettsiales  
bacterium isolate NORP64 Contig\_source1382A\_24987, whole genome shotgun sequence  
MYKMCLTLRAKESIFQVNIYIKIINWFTMSKTKYPLMPKATAVWMIDNTILTFDQIAV  
FCGLHPLEVKGIADGEVATGIFGVDPVSGQLSKEELERCSKNPKATLQIHLSAAYEGVM  
KGAKKRAKYTPIARRQDKPDAIFWLLKNFPEINDATI IKLIGTTKLTVASLRDRSHWNIE  
NIRQRDPVLLGICSQVDLDRVVEQAKLEAKTEAKNEAKTEEKKS

>gene\_1541|GeneMark.hmm|132\_aa|-|9675|10073 >NVVL01000068.1 Rickettsiales  
bacterium isolate NORP64 Contig\_source1382A\_24987, whole genome shotgun sequence  
MIHYQFNKLIRSKLPERMTNEGVLHITHLSKA EYIKELKNKIVEEASEVAETKTENLV  
TELADVMEVIRALSEANDITL EIEAARVEKRSVNGCFLPENYIHYIEVAPDNHEVIEYM  
ENKERPYKKLTV

>gene\_1542|GeneMark.hmm|512\_aa|-|10054|11592 >NVVL01000068.1 Rickettsiales  
bacterium isolate NORP64 Contig\_source1382A\_24987, whole genome shotgun sequence  
MEAKRIYDQIGGVAPKKG YVLFETGYGPSGLPHIGTFAEVARTTMVMRAFQQICDIPTKL  
ICFSDMDMGLRKIPSNLPNQEMIASHLGKPLTAIPDPFGEKESFGHYMNAKLRLFLDRYG  
FEYSFYSAATECYKSGKFDHMMVVRMLEKYDEIMNMLLPTFREERRKTYSPFMPICPDTGVV  
LQVPIEKIDASRQTVFYRDEDEGELVETLVTGGHCKLQWKPDFGMRWSAMDVDYEMYGKD H  
RPNAEYISAICKILGGTPPVQFFYEMFLDAQGAKISKSKGNSISID EWMQYATPESMSLF  
MYQSPTKAKRLHFDILPKSVDEYITFNKKYHEEEDLQKLANPVFHIHNANVPVINTYGI  
SFSLLLNLTSVCNPDDKSVLWSFITQYAPEATPENAPYLDHMTGFAINYYNDFVKNTKSY  
LEPTDAQKTLRQIVDMLSALNGDETGA EIQNQIYAIGTEAKYENLRDFFKEIYQILLGQ  
TSGPRLGSFFKLYGIKDTIQLIESKINDTLSI

>gene\_1543|GeneMark.hmm|179\_aa|+|11658|12197 >NVVL01000068.1 Rickettsiales  
bacterium isolate NORP64 Contig\_source1382A\_24987, whole genome shotgun sequence  
MMKNINDNPEYYDIGIMSIKLNSTCLKNPYFLLLALS VFLLFAYFVEYIMGLAACPLCI  
YQRFPYLIFIMLSIISLGGGQSYNKYIIITLVAIMLAAYHTSIELGIFEPSALCKPLV  
SIDADFSVSDFFKMLYSQKIGTCSK PALVIFGLSMTVWNLLLLNVLLPIFIK YRNYEYK

>gene\_1544|GeneMark.hmm|179\_aa|+|12199|12738 >NVVL01000068.1 Rickettsiales bacterium isolate NORP64 Contig\_source1382A\_24987, whole genome shotgun sequence  
MPKPYFEDKDKKIQEIIMVDHAGEYGAQRIYAGQLKYTNVPAEKKMIKHMLDQELEHLEY  
FENKIKAGKSKPTALLPLWDIFGYGFGAISAKLGSKTAMLV TENVEEVIVEHYQEIDYL  
EKTGKDAPLLQKIKKFKQDEADHINIALDHESKNAKFNKPLSALVQAICKSAIFLSKRI

>gene\_1545|GeneMark.hmm|166\_aa|+|12752|13252 >NVVL01000068.1 Rickettsiales bacterium isolate NORP64 Contig\_source1382A\_24987, whole genome shotgun sequence  
MRLLLMRHAHTHPSEDKPDIDRLLTKRGMSEAKEAAVFLCEYQVDKLLVSYAKRTMQTSK  
IIQTHLSVQSEIVTELYNEGIEAIIDLLAAQEDRNKHILVIGHNPLIYEVALLSNPTS  
AEYDQLIATLMPPARVIIIDFPDAVKWGDIRKMKGNIKKIFTPSVV

>gene\_1546|GeneMark.hmm|257\_aa|-|13328|14101 >NVVL01000068.1 Rickettsiales bacterium isolate NORP64 Contig\_source1382A\_24987, whole genome shotgun sequence  
LCEHQSSNDKKMMFRLWKYAISAWEPYLAKNKSLPIIAPLVLYNGKRKYSSYRRFWDLFV  
NSDLAEKIMAGKCQLIDLQSMPEDEDILADKEFGLFKFFMKNIKKDNGIELWKECFKFKFRE  
HIELDKEQELFYTKLLWSYTGKVKPIERKQELVSLILEQMEKIGKNGEEEMKTVADSYRE  
EGRKGALEEGIFIGEERGEKIGEERGEKIGVEVERKKTVARMLKENFAPKIISSITGMSQ  
RAISKLRSQLKLQGELA

>gene\_1547|GeneMark.hmm|41\_aa|+|3|128 >NVVL01000069.1 Rickettsiales bacterium isolate NORP64 Contig\_source1382A\_24995, whole genome shotgun sequence  
NLNLDKKISKNIEYSRPAHLASKVLTGIHLYQQKQYSDNIK

>gene\_1548|GeneMark.hmm|968\_aa|-|251|3157 >NVVL01000069.1 Rickettsiales bacterium isolate NORP64 Contig\_source1382A\_24995, whole genome shotgun sequence  
MSKSKNVVAVARIGLERRTNKLAANLEILRKQHLLHKENAERIQLPDSNRSLMHELHL  
SAIIQSKNLRFAHALSQAFPEIINKLFGLDDEVFCASLLKMSKDEIINTKGFLFFAVNQYL  
TNNETESLFHLAAAFGANGVLNSLMISRQNDISILDSNGRSFIYILKLCQYNLLIEQMLS  
RYPELDALNEETPDAASIISTSRTEEAKLAQLNQPLSPNTHFNEGIAYYIRYVFPDYN  
DAKLAKKASHCLTQSQHCFMCFYFLTLQEGENDSLMQSNPDRTTVTMNYLLKIYQASRSA  
DNMENPESDFLLNFIKNICINYPCLQQDFIIFIDEFHKTLDLFYEEAYQTVISSNSLP  
IHLVLAVYMKNDTRVLYDAIHDKIGDVKSLCSLEDLDSLKSGDRLRLEFNATIELIGLE  
QNEHLKSKLTA AVFLLKGLAIQQTSPQKAISFFNDVIAPSNKVKTAPKLLVDAYRLKGLA  
LKNTDPNKSIDTFAKAICVINRNPYISLKTLEILLQSLSTYQNNDAANALHILNIAFG  
NIMKFPDIQALYDAATSQHADCDCNRDLTNLRSHLSQWNIFEFCQIYRKFVWCHLLE  
DRALASEQIKALDHYFNDPNSMHMLLLQHVLNNSSEALATFQRINPELLSDTLQTIYQRI  
NEAFIEHNSRMRDESETRVQELEYKLFIQYAQTLLEYGANNFYSWFSALKEHHKIFSAQP  
SCLHNPKFINQLLDQYASILERHSDNSHSLIEWRHTPESLSKLPDDLTKTLPSISSSFH  
SEILKKPSDYLRNLPLNLLQIVFGIEAVFLEKEYEYARSCFKKFESNANLILLEICRQID  
QDFWEYTCDDISRNAEGLYDLLNQLLAQPLSDDQEEKIPPALQVSNATPPTDHIAFDI  
IEYFEYVLNQLLMPDGHDISFKQSVDYAVSIDIAPLESTLEIEAISPHEMNTSCSDFLLS  
GNTEPWYE

>gene\_1549|GeneMark.hmm|172\_aa|-|3287|3805 >NVVL01000069.1 Rickettsiales bacterium isolate NORP64 Contig\_source1382A\_24995, whole genome shotgun sequence



MSATRKPDLSAASSGNSGSTTIDSEVATVLGELIISTQATFASLSMLNHNITVSSGGAVT  
VNGEFSVKNTLIIIEEGGSFSFKGSNITFLNDATLNYEKKCSDGTTTLIGTLNRENTHD  
ENLITLTS DGMTLALDEDYALLTSGESSQNDQESAQLSGASGAPEDSDAL

>gene\_1550|GeneMark.hmm|73\_aa|-|3941|4162 >NVVL01000069.1 Rickettsiales  
bacterium isolate NORP64 Contig\_source1382A\_24995, whole genome shotgun sequence  
MRGLFLVYVSFISVYLNLIIFIYMSFVFICTHCLYLDVVFYISTYSRGIAYRYQDEKIIF  
YMMLHYRVLTNLE

>gene\_1551|GeneMark.hmm|1149\_aa|+|4204|7653 >NVVL01000069.1 Rickettsiales  
bacterium isolate NORP64 Contig\_source1382A\_24995, whole genome shotgun sequence  
MRKVEIPLSSSSFFAWEHFKKSGKNILLCCSDEENAAAAYKQLLFLAGAGRHADILHLPS  
LDSVPYDRVSPNSAILSQRADSLTKLSASQSPKMLISSAQNLLAKIPPPSLFENRTLIS  
KGLSMGIEELSVFLVDNGFSRAASAIIDSSEFAIRGEIIDIVTSNKQGYRINFGWEKIESI  
REYDIYSQISKNHLPSTLSSASEGVLNEETIASFKRNFLQKFGVNHRSPLYESILSGR  
KFQGYEHLMPFLFYEMSSIYDFLGEYSVIYDNLVCVQAMLEHENTYDDFYQSRLLSNKANP  
DSFYFAIPPEEFILPSSEVKDILAKDGNILLEPGEKGSREKDKKDRDHERLGSFGNLR  
QAKIEEKTEFEKLFEVILEHKNKIPVILCSAPSSIERIKNIIIEEYETAKIIEELPRAK  
NFINLAIAPMAITPMASGFVSDKYLLISEKGILGDKTATKSHKSSERKLKNILTELDNIS  
EGALVTHREHGIGRFEKIQTIIYADKIAHDCLKIYENNDILYLPVLNIDQITKYGMEGAQ  
LDRLGGANWQKRKAKLKNRIKDIAASLIKMTAKRQLAQAEVLFQASYEEFCNKFPYNE  
TEDQLSSINDIKSDLEAGRLMDRLICGDVGFVKTEVAMRAAFMGACDINEDSPQIAIVSP  
TTILCKQHYSNFIARFSGTKLRIAQLSRLVKPAEARKNLHDLANGKINIIIGTHALLASG  
IKFKNLKMIIIDEEQHFGVAQKEHLKLNKTNVHVLSSATPIPRTLQMSMVGKIDLSLIA  
TPPIDRLPIKTTVMPFDVAVVIREALMRERFRGGLSFYVSPRIKDIEFIEEQLNKFPPEL  
YKVAHGQMPASRIDDIMSEFCDGKFDILLSTTIIIESGIDIPIANTIIHKADMLGMSQLY  
QLRGRVGRGKVRGYAYLTLDHKKQITKHSMQRLEVQLNIDSLGAGFTIAGHDMDLRGFGN  
LVGSEQSGHIKEVGSLEYQEMLDEAIAELKQQETFEKQADFTPINLSIAILIPADYIDD  
SALRLAIYRRAGDLKTYDEIESFRDEMIDRFALPEEFGNLLRMTAMKNTCSRLKIESLD  
SGPNGFVLKFNKNFDVSNMVMGFVNKYPRHAKIKPEGKLVFLQSLKPEILLKEAEKLLQE  
LGDCQQKAI

>gene\_1552|GeneMark.hmm|188\_aa|-|7797|8363 >NVVL01000069.1 Rickettsiales  
bacterium isolate NORP64 Contig\_source1382A\_24995, whole genome shotgun sequence  
LIKALKLTIASIILVWCGGFFYFLQIINHTPINSVAITDAIVVFGGDSNRLRTGTL LK  
GYAPLIFITCESSQEYTDLIKKHVVIPEQFIVGTDVANCKKSHAADTELFLEQYQLRSL  
RLVVDVSVQLPRALMELSAKLPDPTIIVPHETDIEHKDYVKVLKEYIKYSTLVVMSVLGVQ  
TDLKMSYS

>gene\_1553|GeneMark.hmm|243\_aa|-|8360|9091 >NVVL01000069.1 Rickettsiales  
bacterium isolate NORP64 Contig\_source1382A\_24995, whole genome shotgun sequence  
MLKSYLAGDNHQMTEWISLPLVYNDGIELMEKRLFVIESQKPEAIFLLEHEDVYTAG  
TGKDSSELLAGTSSKETETELLAGTLLQETESSELLRAPKIPVIYTGRRGKFTYHGAGQRV  
IYPILDLRTREKDIRLYVKNLENWIINSLAHLGLKAYTIQGMVGIWVEQKGTAKLGAIG  
VRLKKWVAYHGISINITDLSKYSGIIPCGISNFPVTSKELGIEVSMQEFDSILKNEFR  
KIF

>gene\_1554|GeneMark.hmm|636\_aa|-|9063|10973 >NVVL01000069.1 Rickettsiales bacterium isolate NORP64 Contig\_source1382A\_24995, whole genome shotgun sequence  
MKIKLLSNTTINKISAGEVIERPASVVKELVENSIDAGATQIEITLEQAGKNLILVRDNG  
IGMSKEELELAIQRHATSKLDEDDLINNSFGFRGEAMP SIGAISKFKITSRKRGSSEY  
SLSIIGGTQEATVGATSNEGTVIEVRDLFFATPARLKFLRTDRTELNASVNLIKRIALAH  
PSVAISLIHDGKELIKVPLEGTSAEALKNRIIEIIGAEFIENAVQIDSVRGDNLRGDIE  
ITGYTSLPTYNRASAEDQFLFINNRPVKDKILNIALRVAYQDYLSRDRHPVSVLFLRVAP  
HFVDVNVHPAKTEVRFHDPNLRGMIISAIKNALSSSSYRVSTTASDAALSYMRGNSTQP  
DMQGNTQPAGFAEKASTSASATSQGGFSMPSSGGRGSANRYAHTRGASSHAPRVDYALAAQ  
DFLAEAKPESFIETQQEELPKSRFPLGAAKAQLHGTYIISQTDDSIITDQHAAHERIGY  
EKIKEQMEKNSMIKQRLLIPEIVELPDSARADILIDHQDALS KLGLTIEKFGEKSIIVSE  
IPSLVGEINPASLICDLAEHLISMGENIALTELIEHVTETYACHYAIRAGKKLGGHEMNA  
LLRQMESTPFSGQC�NHGRQTYVELKLADVEKLFGRR

>gene\_1555|GeneMark.hmm|416\_aa|-|10970|12220 >NVVL01000069.1 Rickettsiales bacterium isolate NORP64 Contig\_source1382A\_24995, whole genome shotgun sequence  
LLKKDFIISVLTVFVQYYDYHLFGFLAANIATHFFPADEAIMQLLNTYFLMSVAMAAPV  
GAVIFGKIGDVVGRSNSFKISLIGTAIASIILFITPSYESIGLLSAFILLIARMIICAFV  
SSGSDGVRIYIYENIDKSKQCLGVGVTSLFAQAGSLTASVSAWFFTMNSMPDYSWRFAFL  
IGGIIGFVILIAMS KTNLSDMKPVKNHPRFEFRDLSIGTIVKSNKGLFFWCTLLAGGIG  
STNQFILIFFGTYNFEILKIIDRALMQSYISLAIAYMIIFSIVGGYLADKFDYKVTIYA  
SIMVIILSIMLSISLNQMMVRAELFIAIAAVMPFITMPSAAILKQSIPVVIRYRLFALSH  
ATGSIIFSAPTALLSTLLYHKTKLTWLPVCYFITIIMISLSLYHLNKRRISEPEE

>gene\_1556|GeneMark.hmm|360\_aa|-|12272|13354 >NVVL01000069.1 Rickettsiales bacterium isolate NORP64 Contig\_source1382A\_24995, whole genome shotgun sequence  
MKKFKNIKNTTHKKARVGTIETAHGEIQTPAFMPVGTRGTVKAMMPESVKATNSDIVLGNT  
YHMLKPGAERIARLGLRKF MNWSSPVLTDSGGFQVMSLSDLRKISEDGVQFRSHIDGS  
KHMLTPEYSTEIQHLLDSTITMAFDECTYPATFEEAKSSMELTSRWAQRSRDAFKIRDG  
YAQFGIIQGGVYEELRAQSAKDLIPMDFDGYAIGGLAVGEGQEEMFVSNYAPDLLPKEK  
PRYLMGVGKPDIIIGAVKRGVDMFDCVIPTRSGRNGQAFTKSGTINIRNSHFADDNEPIE  
ADCPCPACMNYSKAYLHHTVKVGEMIGSMLMTWHNIQYYQDLMKRIRAYIAAGKDFDFDC

>gene\_1557|GeneMark.hmm|66\_aa|+|13662|13862 >NVVL01000069.1 Rickettsiales bacterium isolate NORP64 Contig\_source1382A\_24995, whole genome shotgun sequence  
MSEVIEETEDAAIWEESVVGQEALVAENTATKTPAPPADRPKSTSKNNKKKTEPSRQAL  
QGNLRQ

>gene\_1558|GeneMark.hmm|64\_aa|+|13882|14073 >NVVL01000069.1 Rickettsiales bacterium isolate NORP64 Contig\_source1382A\_24995, whole genome shotgun sequence  
LKKHLPEDLKKHLDLHDKVERDTFVSEDLKESMSDIVYKIKTKNQKKDGDVILFLCEHQ  
SSND

>gene\_1559|GeneMark.hmm|97\_aa|-|3|293 >NVVL01000070.1 Rickettsiales bacterium isolate NORP64 Contig\_source1382A\_25018, whole genome shotgun sequence  
VTFHDMRLRKLESYAATRTEGNFDSKALVANLRRAAKGNTYRIYAEPQSEQGGFRVAARI

EKDVDGEVKTHLMIRADKQCQSMEEAMTTSVRKAKILI

>gene\_1560|GeneMark.hmm|189\_aa|+|287|856 >NVVL01000070.1 Rickettsiales  
bacterium isolate NORP64 Contig\_source1382A\_25018, whole genome shotgun sequence  
MSHLYYRNLEKIGFSKAEIKEIADDHEVIDGPDNEGDMFERKALPSDNFVPPYPNEQAAR  
ASNINGAFPADLSLVVKARPDGANYLFSLLTGYS DAPAGVTLMPGLSYNPYFEGGQIAMPP  
PLASDQVEFIDGTPATLEQMARDLTIFLQWAAEPEMEHRKSMGLKMMMFLAIFTILFMIA  
KKRTWQKLD

>gene\_1561|GeneMark.hmm|298\_aa|+|1033|1929 >NVVL01000070.1 Rickettsiales  
bacterium isolate NORP64 Contig\_source1382A\_25018, whole genome shotgun sequence  
MNTHQPEAIAIIDSMENMYHKLRYIPSKINSMSVTKIGETLIVDSALPSDTFNTAYGGH  
ITLEQTKLVMEYYLNRKMPMAWWICSSDDNKNTKDDMESAGFVHDEFDVGMYCDLSSAD  
LDEYTAPEDLQIIECRSAQEFDFGNVLSIFDPTDEYVKIFYSKIQAIPQDAREDILIF  
VGYANNQPVATSGLFITDVAGIYDVSTKPNEQRKGYGSAMFHTALAYAKNKGLKTSILQA  
SPDGLNIYKRFYKEICDFNTWSNKAKLELQEEKSFSKLADERIATTKKWVSHEDAWK

>gene\_1562|GeneMark.hmm|70\_aa|-|2007|2219 >NVVL01000070.1 Rickettsiales  
bacterium isolate NORP64 Contig\_source1382A\_25018, whole genome shotgun sequence  
MDNSFTLTANLIESLQELDNKHVMISPVLNVGAVSNYTKNTDLTFEEVRNAAWLNSRNN  
QSTKKLRLQA

>gene\_1563|GeneMark.hmm|329\_aa|+|2507|3496 >NVVL01000070.1 Rickettsiales  
bacterium isolate NORP64 Contig\_source1382A\_25018, whole genome shotgun sequence  
MHFWGYMRVENKFNLSLIVILLSVLIVSCANQISNKNTQSNQGYIQVQGGKIFYKSMGQG  
TPILVVHGGPGLDQTYLQPQLFEFAENHQLIFYDQRGSGKSLESTDNSSNINIEQFIADI  
EELRTKLGLKKIILMGHSWGGLLSMHYATKYSKNLHGLILLNTAPANHKGQKAFVDSFME  
RTANIKKDITPLFSYKEFEKQANANEIADLYRKVFSVYFYNQSDVKSLNLTFFVNSAKSGF  
KVNEKMSKTAWLETGINLLPQLKTLKVPTLILHGKQDVVPLWTAKEINSVIKGSKMITLE  
NCGHFPYIEKPNFKRAVNDNFINTLKDTN

>gene\_1564|GeneMark.hmm|59\_aa|+|3543|3722 >NVVL01000070.1 Rickettsiales  
bacterium isolate NORP64 Contig\_source1382A\_25018, whole genome shotgun sequence  
MERSKSFVVKAVEQYIITTKEDAEDIKAAALQALEAGGSICSLEEMMEELGIEHDRATN

>gene\_1565|GeneMark.hmm|129\_aa|+|4048|4437 >NVVL01000070.1 Rickettsiales  
bacterium isolate NORP64 Contig\_source1382A\_25018, whole genome shotgun sequence  
MSKDTDNIKNSRPLSPHLGIYKPQITSMLSIGHRLSGVGLFFVLAATCWWFALWVFSRFD  
PAYLDILDNNFVKTILIIASYGFFYHLCTGIRHLIWDTGRCFSICAVHYTGWLAIIGSLA  
LTLVYWLYI

>gene\_1566|GeneMark.hmm|127\_aa|+|4449|4832 >NVVL01000070.1 Rickettsiales  
bacterium isolate NORP64 Contig\_source1382A\_25018, whole genome shotgun sequence  
MENKFKSDLSLAKNLGSAAHGSMHWWHQRVTGLFLAIATIWFCCFSWEISASEMSGVVEV  
IKKPWHVVMLSLFLAAFYHSLVGMQVVIEDYVHSRAWRVGMILLVIQIFSIVTAAALIVA  
ALYVMTL

>gene\_1567|GeneMark.hmm|595\_aa|+|4847|6634 >NVVL01000070.1 Rickettsiales bacterium isolate NORP64 Contig\_source1382A\_25018, whole genome shotgun sequence  
MSKPYNVINHEFDV V V V GAGGAGLRATFGMAEAGLSTACISKVFPTRSHTVAAQGGISAS  
LGNMGKDDWRWHMYD TVKGS DWLGDQDAIAYMCKNAADSVIELEHYGV PFSRNKEGKIYQ  
RPFGGMTTEYKKGKAAQRTCAAADRTGHAILHTLYQQALKHQAQFFIEYFATDLIMEDGV  
CKGVLAWNLDDGTLHSFRGHTVVLATGGYGRAYFSATS AHTCTGDGGGMCIRAGLAMQDM  
EFVQFHPTGIYSGCLITEGSRGEGGYLVNSEGERFMERYAPSAKDLASRDVVSRSMTME  
IREGRGVGPEKDHIYLHLNHLPEVLASKLPGISETAKIFAGVDVTKEPIPVLP TVHYNM  
GGVPTNYKTEVITLKD GKQEIVPGLMAIGEAAACVSVHGANRLGSNSLLDLVVFGRAAAHR  
AAEIVEKGM SHSRLKEGTIDALIDRLDEVRSSK GKILVSDLRLKMQKTMQNYAAVFRTEE  
TLEEGKRLIDEIREEYKD IKISDRSLIWNSDLVEALELGNLIDQAVLTMHAAA NRKESRG  
AHAREDFQDRDDKTWMKHTILWLNEDGKVTIDYKPVTLD TNTDEVDTVPPVKRVY

>gene\_1568|GeneMark.hmm|261\_aa|+|6652|7437 >NVVL01000070.1 Rickettsiales bacterium isolate NORP64 Contig\_source1382A\_25018, whole genome shotgun sequence  
MAEMRLPKNSRVESGEFHVGIESAKTPKRLKIYRYNPDTAENPKLDTYEIDL DSCGPMVL  
DALIKIKNELDSTLTFRRSCREGICGSCAMNIDGTNLACTKPIEEISGDIKIYPLPHMK  
VVKDLIPDMTHFYAQYASIKPWLKTDTPVARGEERLQSEEDREKLNGLYECILCACCS TS  
CPSYWWNGDKYLGPAILLQAYRWLADSRDEADGERLHELEDPFKLYRCHTIMNCTSTCPK  
GLNPAKAI AEIKKKIVERVGI

>gene\_1569|GeneMark.hmm|290\_aa|+|7610|8482 >NVVL01000070.1 Rickettsiales bacterium isolate NORP64 Contig\_source1382A\_25018, whole genome shotgun sequence  
MFEKPLISFDFAIKFLLKSKEDYEIIEGFLSALFVANNYKPVKITALLESESTKEAAHLK  
KSVADLIVEDTDGNKFIVEIERSFTPNFTHKACFNTARLISDSLSTSQDYSKIQKIFHIS  
LLYFETAGMEKPIYHGKTIIEVDTEHPIDIDIMNQGIATFESKNIFPEYFFISVPRFND  
QIRSEMDEWLYMMKNSEVKKDFKSPYMARVAERLKV LHMTDDERA EYHKYLKESAVQEDI  
LKAATDRGLEKGRKLEKIEMAKNMLTQSLDINIISKVTNLSINEIEQLRS

>gene\_1570|GeneMark.hmm|306\_aa|+|8512|9432 >NVVL01000070.1 Rickettsiales bacterium isolate NORP64 Contig\_source1382A\_25018, whole genome shotgun sequence  
MNIRDSEISSIEKWQEH LAVQRNYSMHTLQSYLGDNLHFLDFTTNYYSKSASLGQIESI  
DIRFIRSWLSARHREEYSAGSNARALS AVRN FYKYLEKKHDIHSHV VFTVQTPKKPKALP  
KALS KQDVTASLNNIDLIGNKDWIHC RNKALLTLIYATGLRISEALS LTKQHLKNHEFIK  
ILGKGNKERVIPWIEESRLLLEKYIQLLPYPIAPDEPIFRGQKGGILQRAVFNRELINLR  
RALGLPEYLS SHAFRHSFATHLLENGADLRSIQDLLGHQSLSTTQRYTKINKTHLESVYN  
KAHPES

>gene\_1571|GeneMark.hmm|737\_aa|-|9608|11821 >NVVL01000070.1 Rickettsiales bacterium isolate NORP64 Contig\_source1382A\_25018, whole genome shotgun sequence  
MSRTRLNEANDNLVTAVREGKWYSIPSCLEKDADIN YTTKSGK TLLMMAAKNGHTYTVQE  
LLKLGADVLC TTKGNSALT LAARKGHVDTALLLLELGADTDDIHPNDLDDGLCEFRNAL  
MKA VQKESKYIVRILLVIPDVDCEAALIMAVDDGNLPMIDLLLDEGIGIHLITREALTR  
VATNGRYDVVSSLLCAGVDPNYLGEFFYPVLRDAVQNYGIEVLLKLEANPDSIYSRDDA  
GYTLLMHAVQNGCLSAVNELLKVAPNIIHMDNERNTALKIAKSL ENNPISIHITFALLE  
AGANPRDLTESEM GTTLINA AKKGK KDVIQILLEVGLDLN QDDEFGYNALTYAAQNGHLV  
VVEMLLEADVNPDYNEFAPMREAVTNERTGVVTALLKADANPNCTIKFGNTPLMQYAKKG

DSAMVKMLLEAGANPNDVNKFGYNALSCAPRGTGDEVRSILLEVSDDPIPIIELSLPAF  
SDTKSDPESDSEEEELGEFIDELWRKTVLGYIEERLLEVS DHRPSSTLPDFSDSEEEYRAE  
QLGIGKRAQTIDLLSGDINLMRQQLLTQAAENGWHDTVSLCLNEGADPHDLSRSQFGATL  
IKAAKNGQNDVMQILLDAGADLNHSDEFGSLLAYAAQSGNSAVVQMLLAAGYHPDNDLIT  
ALKISLENDYNGIVGMILLEKAAGPDYVDQSGDNALMRCALSEVSNHRPSSFSYIDDPEEK  
HLTVESSESSEESDCD

>gene\_1572|GeneMark.hmm|660\_aa|-|11970|13952 >NVVL0100070.1 Rickettsiales  
bacterium isolate NORP64 Contig\_source1382A\_25018, whole genome shotgun sequence  
LNEKQNNLIDNLTNCIKILSVDAIESAKSGHPGMPLGFAQVMTVLATEFLKFQPKHPKWF  
NRDRLVLSAGHGSALLYSLYLAGYQEFSLDDLKNFRQLHLSKAAGHPERDMHDAIETTTG  
PLGQGMANAVGMAIAAKKYKAELGKEICDHKIYTIVGDGCLMEGISYEASVAGHLKLDN  
LIIFDDNSISIDGKTNITVSEDHLKKFEAMGFNTTRIDGHDTTQIRAAALAEAQNSDKPS  
FIACKTVIGKGALTKEGSEKSHGAPLGEDEIKHLKSQIPFAKGFYIPEELKLAWEDTSR  
KSDKEYLAWQENFSKLSKSYLPASVINIPDIESPNKPEATRVSSGKIIEALMGQERK  
IICGSADLAGSNNLKNQWSRAISAQDFTGNTIHYGVRENAMGAIMNGLALSFTPIGGTF  
FVFSYMRPSIRLSALMGLPVIYVMTHDSIGVGEDGSTHQPIEHLASFRAMPNINIFRPA  
CFTEVKECYEIALKSKSTPSMMGTSPMMVLTRQAVPRIRSGDSGSSVDSGNMSSKGGYII  
SEANDASNIDITIFASGSEVGLAIEVQEALELQGKSVRICESVPSMELLWAQGDYLDLDR  
GNAGMIAAIEAASSLGWHRIIGSKGRFFGMDSFGASAPAKDLYKHFGLNADAIVNGLLRS

>gene\_1573|GeneMark.hmm|67\_aa|-|12|215 >NVVL0100071.1 Rickettsiales  
bacterium isolate NORP64 Contig\_source1382A\_25058, whole genome shotgun sequence  
MFRVFLIIIALITIIIASGSVPQLSMLAWIKDVFFSAARLIFSIVRGVWPLLILAACGY  
LLIKKSR

>gene\_1574|GeneMark.hmm|512\_aa|-|303|1841 >NVVL0100071.1 Rickettsiales  
bacterium isolate NORP64 Contig\_source1382A\_25058, whole genome shotgun sequence  
MITKISSLAFNGIDITDVDVQVQIEPGIPKFTIVGLADKTVAESKERVRAALLSIGLSLP  
AKNILINLAPADLVKEGSHFDLAIGACILASMGALPAEQVANYLILGELS LDGAILPVNG  
VLPVAIGASARGKGVICAKQNGSEAAWSGNDDILAPANLLELINHFKGTQTLEQPKPAVN  
SKTVTYPDLKDIKQKIAKRALEIAAAGGHNLLMFGPPGSGKSMLAQRMPGIMPELSPME  
MLECSTISSIAGRIQDGCLTRERPFRRSPHHSCTSAAMVGGGVGRKVKPGEISLAHHGVLF  
LDELPEFN SAVIEALRQPLETREVLSRGAHV KYPANFQLIAAMNPCKCGYL NDSYKSC  
SRAPMCGSSYRSKISGPILDRFDLHIEVGNSEVDYNYDQILNVS GEESSQDVAARV KAAQ  
LTQLERHDGHNIRLNNSLEGQLLIDYAVPADDGRDMLNEA AKKFRLSMRAYNRVLRVART  
IADLGGVKSVRKI HIAEALS YRQFDFAEQKVA

>gene\_1575|GeneMark.hmm|443\_aa|-|1883|3214 >NVVL0100071.1 Rickettsiales  
bacterium isolate NORP64 Contig\_source1382A\_25058, whole genome shotgun sequence  
MTSKNKMGLTPTEIVNELDRFIVGQKNAKKAVAVALRNRYRRACVAEPMRSEIAPKNILL  
IGSTGVGKTEIARRVAKLEDSPFIKVEATKFTEVGYVGRD VDSIIRDLVESAVDFQKTQA  
KKDIAEKAKDRAIDRILETVVGKTASEETKNRFKEKVLSGELDSTEIEISVKDTPAAGGN  
FFDVPGM PGASMGVLNVT DMLGKVMGG EKTKQK KLSVKDAIK IIIA EESDKM IDEEKTIE  
KAIKAVENDGIVFLDEIDKIASSSSETRRGQVSREGVQRDLLPLIEGTNVSTKYGTVKTD  
HILFIASGAFHLSKPSDLLPELQGR LPIRVEMTALTKEDLVKILTEPESSLVKQYMALIA

TEGVVLEFSDEAIENIATYAARFNMEIEDIGARRLHTILEQLLEDISFDVTHSKKKKITI  
DKKFVDERLSGFVKNRDLAKFIL

>gene\_1576|GeneMark.hmm|187\_aa|-|3211|3774 >NVVL01000071.1 Rickettsiales  
bacterium isolate NORP64 Contig\_source1382A\_25058, whole genome shotgun sequence  
MSNSSTNGADLRGTTILCLKKGDDVVIAADGQVSLGNSIMKSTARKLRTLSDNKIVAGFA  
GSTADAFTLFRLEAKLDQHSNQLVRSVELAKDWRTDKYLRRLEAMLIVADKDNILIVT  
GTGDVIEPEDNIAAIGSGGLFALSAAKALVSVEKNKMTAEEIAKKS MNIAADICVFSNHN  
IIIEKVV

>gene\_1577|GeneMark.hmm|122\_aa|+|3850|4218 >NVVL01000071.1 Rickettsiales  
bacterium isolate NORP64 Contig\_source1382A\_25058, whole genome shotgun sequence  
MNIYSIYTNPNKND DAPVPIKQGFSLVAGLFWALYHKMWSVALFMVLITTFIGAIIDS  
SHTGFSVNIMIMLTFAIFASDLMENRLTKRGFKLDDIILAANEEEEAEIRYFMRKNSNKSE  
QL

>gene\_1578|GeneMark.hmm|112\_aa|+|4277|4615 >NVVL01000071.1 Rickettsiales  
bacterium isolate NORP64 Contig\_source1382A\_25058, whole genome shotgun sequence  
MYDKNNVFAKIIKNDIAGEKLYEDENLIAIKDINPEADIHLLVIPKGDYVDLADFTTNAS  
AQEIEHYFKMIIPIAKENGAEYRIVSNSGASAGQSVFHFHTHILSGSKLSM

>gene\_1579|GeneMark.hmm|360\_aa|+|4681|5763 >NVVL01000071.1 Rickettsiales  
bacterium isolate NORP64 Contig\_source1382A\_25058, whole genome shotgun sequence  
MSKEYIVAIIGATGNVGREVLNSLSERNFPVKEVIAAASANSVSGKEVSFGDDQTIKVLQM  
DELDFAKIDIAFFCAGSEVSEKYAKKAASKNCIVIDKSSLYRLEKDVPLIVPEANINALK  
DFSANAGDASTNGSAGTADASANGSRGGIISNPNCVIPLAAALKPLDNEAKIKRIIVST  
YQSVSGAGKSAMDELYLQTKAKVFENTTPSVFPTQIAFNLIPIQIGDIRDDGSCDEEYKI  
EQEMQKIMGNHISL SVTCVRVPVFSHMSVNVFENDMNAEAEELSEADGIIVYSRE  
NEIQYATPVDVVEHDEVFSRVRDDKSRKNSINMWICVDNLRKGAALNAVQIAEEIIKTA

>gene\_1580|GeneMark.hmm|295\_aa|+|5872|6759 >NVVL01000071.1 Rickettsiales  
bacterium isolate NORP64 Contig\_source1382A\_25058, whole genome shotgun sequence  
MILSDEEIGMVQKNESQFVSFKYLDDKGV LKQIDTSFQNILDGKRFFSDDSINLKTIIIGK  
AFIDPFRSPTTSFFCENLTSKDNQRGKAIKLIDEYSEPDFVFLGAEIRFWVFVKINDCD  
KFTSGFVDPFANLRSDIIACMEKINIPTTHNCGEIPTESVVGIEGNSIVDLADNVLLAK  
FIIANVTDSYGMSALFSCDPSASNLALLARGNTERMTENARNITRDSAKIKEVTGLKTDN  
LKDSSVLTIHKAELNDDL VNIKISMQTKGEFVYPYLAFTELLLYNAVGS SLGNTVF

>gene\_1581|GeneMark.hmm|585\_aa|+|6908|8665 >NVVL01000071.1 Rickettsiales  
bacterium isolate NORP64 Contig\_source1382A\_25058, whole genome shotgun sequence  
MAKNFNQVDKPLNPLKAALEKCRAAFVVFVFAFFINLLMLVTPLYSLQVLD RVI GSGNL  
STLLMLSIIIGVVYFVHMKLQIARSFTLIKVGWLDNNVAPTIFGHSISASATKVN PASS  
QLLRDFQTIKFFTSTGINTVFDAPWSIVYITVIFLIHPYIGLITIFGAVLIVSLAFFNA  
VATNRTLGEATEFSIKSMGQAEIANRNAEAVEAMGMIANVKKNWAKFNEASLAKQSTASY  
RNGVIQNF SRFIRNIMQMAVTGTGAYVVVSTNGQDMTTGGMIASSIIVGRALAPFDNSIV  
MWKISIGAMKSYKNINSSFDKHEERDQAMPIPHVDGHILTVENVYAAPTPPGKQPMPK  
HILKGVSFALQPGESLAIIGPSAAGKSTLAKLIVGVWHASSGSVRLDGGDVFTW NRENF

QHVGYLPQGIELFGGTIKQNIARMMDDADPAKVIDTAKMCGAHEIILRFSDGYDTDIGPG  
GNSLGGQKQRIGLARAFFGDPKLVILDEPNANLDEAGEMALSDALKAAKARGIAVVLIS  
HRPSVLSEVDKIMVLQDGSVASFGSREEVQGRIKTLKNGMIHIND

>gene\_1582|GeneMark.hmm|528\_aa|+|8687|10273 >NVVL01000071.1 Rickettsiales  
bacterium isolate NORP64 Contig\_source1382A\_25058, whole genome shotgun sequence  
MSDNKEKLTPEKLIKQIQQLQQMMAMAADKGVPGGLPPGGLPPGFPMKKPSKWSLKGMF  
IGTLQGMQGGVKFIDQFVNFITKQDGDKTNDVIKNARSPILFGTFVIFFFVLVGVVWSAT  
APLDSAAVAIGTVISKSQKQINHQEGGVLEKIFYVEVGDRVEKGDKLEFDDTKMHSEYE  
IILNKYRIYLAIETRLTAEINDDPEITYPKFLLDDQSVPEVAKIETQNSMFYSKHEITV  
AEKASIEQKVKQTNLQIDAQNARKVALNKTREIVQDRLEASKKLSKKGIIKKTDLNLEE  
KEAGTLGELAIADIEIAKMHQEIISNIELINLDNQVSTRAHQELKEVQLSLAEAKERLV  
LLKDALS RVIVRSPVDGVVNNLYHHTVRSVIQQGQPIVDISPTADSLVIEVKLEPRLISD  
IKVGR LAKIRFS AFKSR TTP LFMGEVVS MSPDIVIDPRQQNNPTLANGYYLARIEIDMDA  
FEEIAKTRNLELLPGMQAEVQIITGTRTMLQYLLDPVFDAMFKGFKEK

>gene\_1583|GeneMark.hmm|51\_aa|-|10476|10631 >NVVL01000071.1 Rickettsiales  
bacterium isolate NORP64 Contig\_source1382A\_25058, whole genome shotgun sequence  
MAGSFCSANFKLACQLKLFQKLVEMEGIEPTTFCLQSRSTPELHPHFVE

>gene\_1584|GeneMark.hmm|80\_aa|-|10661|10903 >NVVL01000071.1 Rickettsiales  
bacterium isolate NORP64 Contig\_source1382A\_25058, whole genome shotgun sequence  
MITSCGRICIGKKKINVSTVLAGQNVGIMQVEDNIWLQVFMDFDIGYFGMDSCRIEPTTD  
PFGVKLLSMCSVYTAMSVIR

>gene\_1585|GeneMark.hmm|61\_aa|-|11022|11207 >NVVL01000071.1 Rickettsiales  
bacterium isolate NORP64 Contig\_source1382A\_25058, whole genome shotgun sequence  
LSKLSVWWLRLGIKIERIKHGNPQQNGRHERMHRTLKQDAAKPAAFNFLQQQEKFDHFVK  
V

>gene\_1586|GeneMark.hmm|59\_aa|-|11204|11383 >NVVL01000071.1 Rickettsiales  
bacterium isolate NORP64 Contig\_source1382A\_25058, whole genome shotgun sequence  
LTITDNYSRYLLACEGQESTKAFGAFVFEAVFKEFGLPEKLFVIMAHHSLRAMLYMA

>gene\_1587|GeneMark.hmm|466\_aa|-|11729|13129 >NVVL01000071.1 Rickettsiales  
bacterium isolate NORP64 Contig\_source1382A\_25058, whole genome shotgun sequence  
MSKDPMSDIEEVNARTKRNRRDVENDIDEPQAKRAKTSDEVNAGAKRNRSNAENDIDEPQ  
AKRVKITIEEMIKMHVRNNDMAENILDVVG YFAESGYLERFVESLDDHSRSVLYDEITSL  
DSSMNQEIIRAMNAGKVADLLDCQYADSIFEGRQDEIFQAITRENKLDKLTSGRHDALH  
MFNRFSSDDIISMVYKPNMSTENIQSVIGNVVEGCLERFVESLDDHSRSVLEANINNS  
NIQLEIVERAIDAENVAALLDCRYANSIFRGMEQRVIKAIKENKLEDELLHGDRSGKEY  
FAKLMLEITSDIPEDIIVITDKLQNLDLLSSAKEALLERHRQPRNPRSRNPARPDDPIPQ  
KHPLLQHIYVFENETMRKDAAMHSLDERKNPEIPREVSRLVSEFTHGKDVG AHNFLPLP  
EDQQQLQQSARTLRASRASTQTSSSSAPRGGQPKPRNVRGDGLGR

>gene\_1588|GeneMark.hmm|195\_aa|-|82|669 >NVVL01000072.1 Rickettsiales  
bacterium isolate NORP64 Contig\_source1382A\_25088, whole genome shotgun sequence  
MVEINWTFEEFFSAGGNTKFEDRLASVLGVHSSRIKIVGVKTGSSIIHYFITLNEEYAND  
PDKQKLELSKINDMLASLYASGEFEKHLGMPILRMESYLSGPDGAGSTGNNSEKSESNV  
KYPVLGLLIFSAALLILGAIVAFMVMRRRSKYDMVQVRSTSDVAKDDGMFTSNKFDIDAT  
LADEEKFNVSNAHLK

>gene\_1589|GeneMark.hmm|70\_aa|-|741|953 >NVVL01000072.1 Rickettsiales  
bacterium isolate NORP64 Contig\_source1382A\_25088, whole genome shotgun sequence  
MNYKEKMMLSRDYRSEFNSLMLDIMQFTLNLSMENFNLNKSRNAMPSMMVTLNVPVILLK  
ILVENAHGPR

>gene\_1590|GeneMark.hmm|102\_aa|-|1315|1623 >NVVL01000072.1 Rickettsiales  
bacterium isolate NORP64 Contig\_source1382A\_25088, whole genome shotgun sequence  
MFGYNTHMTDYQAITEVTGITIIDSNIANLHVAFDAPIEWVQLSICGDFHCTGPRNYFIS  
ISESTIDESCTNDYGFDFSMTGGLVPPNRIVDDFVSVDDCT

>gene\_1591|GeneMark.hmm|60\_aa|-|2308|2490 >NVVL01000072.1 Rickettsiales  
bacterium isolate NORP64 Contig\_source1382A\_25088, whole genome shotgun sequence  
LEETEGAPLRQLIQYCSFNYGRGWAINIDEAFNVDILNNVVFHHVAIGFQVTISTNVLIS

>gene\_1592|GeneMark.hmm|61\_aa|-|2728|2913 >NVVL01000072.1 Rickettsiales  
bacterium isolate NORP64 Contig\_source1382A\_25088, whole genome shotgun sequence  
MIFTEHNDRLYHVDRVLAKTDPQTISAGDLVKDIQGYYTILHNAEEGYFYIEIKGDGWG  
A

>gene\_1593|GeneMark.hmm|189\_aa|-|2956|3525 >NVVL01000072.1 Rickettsiales  
bacterium isolate NORP64 Contig\_source1382A\_25088, whole genome shotgun sequence  
MTRLLESAEIGSTTITVDESEVSNWVIGDRIALAPSGFNAREGESFTILDISVDGNLATI  
TVDEISFYHFGAETGAGESDCSTDIRTEVIHLRCVRIIGVEDQTLKVIKSPINDEDS  
SSTKSASSTDGSSKYDSAKSSSSCSTKKSSKSSKSSKSSKSDSKSKSKSDDDEEERRV  
RRLSLTGGR

>gene\_1594|GeneMark.hmm|60\_aa|-|3522|3704 >NVVL01000072.1 Rickettsiales  
bacterium isolate NORP64 Contig\_source1382A\_25088, whole genome shotgun sequence  
MKILQLKMFKIIHSRENLSYCLVISKMLILLQEVLLKQAIKLLLTLEASQLILTITTNQ

>gene\_1595|GeneMark.hmm|178\_aa|-|3706|4242 >NVVL01000072.1 Rickettsiales  
bacterium isolate NORP64 Contig\_source1382A\_25088, whole genome shotgun sequence  
LHAKVIIICRDISKICIPGLIAAEKETFLRYWSNSQHWFKAEPEPERRRLLIREENDDEEDR  
DGFVRYELPVNGDNVEILEGRNVIYDLFYSPPTNNTPALRTVIVNGNLIIPMKKTKHNGS  
EEGGIIYIQDEIDYDKPKTAYDKLASNNAEAEDFIGRIQAKHIFTRKGVVYVGLFPE

>gene\_1596|GeneMark.hmm|68\_aa|-|4312|4518 >NVVL01000072.1 Rickettsiales  
bacterium isolate NORP64 Contig\_source1382A\_25088, whole genome shotgun sequence  
MTHFLHNTTAYREDIDLTAIGSMCTPLEFKLTLTDSTIDNMLDGASHGDNYYDYAAEMWHF  
VISGYQQN



>gene\_1597|GeneMark.hmm|139\_aa|-|4870|5289 >NVVL01000072.1 Rickettsiales  
bacterium isolate NORP64 Contig\_source1382A\_25088, whole genome shotgun sequence  
VTPSLPEDGAAEEILFNMIFGNGTGVHNSREVRKLTFTKYNPYYTFRGAHLNIIRVTD  
FLGEFDEEIESNLPCVEEPEEGVRLKKRDRKHGKYYEQFKNHKGKSTSSDDNDNES  
GSKSKSKSHTSHSHSH

>gene\_1598|GeneMark.hmm|66\_aa|-|5316|5516 >NVVL01000072.1 Rickettsiales  
bacterium isolate NORP64 Contig\_source1382A\_25088, whole genome shotgun sequence  
MDYPSMLLKEFILVHLEDKFSKIPITRSLIYQNSLSPKISLISYGLFIILGTLSQFTH  
MEDLNI

>gene\_1599|GeneMark.hmm|105\_aa|-|5517|5834 >NVVL01000072.1 Rickettsiales  
bacterium isolate NORP64 Contig\_source1382A\_25088, whole genome shotgun sequence  
MDILLTSLLEELQHWQEIILKAMKSTVDILMSAKEKNLYGVSSLQELKTSKSTMFTSQ  
STSANAITELSLMAQIALIELLSEPVHIVKHGIQHLKEGIKLL

>gene\_1600|GeneMark.hmm|63\_aa|-|5919|6110 >NVVL01000072.1 Rickettsiales  
bacterium isolate NORP64 Contig\_source1382A\_25088, whole genome shotgun sequence  
MKLLELSVETEHQMKCMDLEFTARCITLLMHSTSRDHKLSLKTSLAIRMSDAELFTLM  
LDI

>gene\_1601|GeneMark.hmm|146\_aa|-|6112|6552 >NVVL01000072.1 Rickettsiales  
bacterium isolate NORP64 Contig\_source1382A\_25088, whole genome shotgun sequence  
MNTEFQYVQGAYQIGRYPLHFNKIGNARESIVSGCSIHNSYNRIVGIQGTNNLLIKDNVS  
FRTKGHGYYFANGDETNNFNNLALIVERSWSLLNTDKIPSTFWIRHPMNHFIGNSAGG  
SDGNQFWYDLESQPRGSTFGTSSARP

>gene\_1602|GeneMark.hmm|151\_aa|-|6637|7092 >NVVL01000072.1 Rickettsiales  
bacterium isolate NORP64 Contig\_source1382A\_25088, whole genome shotgun sequence  
MTRVDITLSGTYDPAVPVFGKKVLAARNGLISFVGQDVVDHTFLNASSVPWESHISVA  
GDAGWHVGDHIVVGTTSFSNYESEERTIVEISYDETSETTSITLDTALWYHHFGDLFSAG  
KTGEEKDFEMRAEVALLTRTIRFRGNPESQ

>gene\_1603|GeneMark.hmm|150\_aa|-|7593|8045 >NVVL01000072.1 Rickettsiales  
bacterium isolate NORP64 Contig\_source1382A\_25088, whole genome shotgun sequence  
MVMMVLSIFIDQKIVKFLSHSQMVIEFHMSLDLIIGFQMLMIVKQITLTEMMDLSFMPQK  
MELKKMLFGKQELRYNLDIMMLEFLLKDLILLFSEVKVTPVLLRSNSKDILFMNLMNV  
LLKLNTLIKEVEHFMIQEQLLHLIKPRHCQ

>gene\_1604|GeneMark.hmm|65\_aa|+|8484|8681 >NVVL01000072.1 Rickettsiales  
bacterium isolate NORP64 Contig\_source1382A\_25088, whole genome shotgun sequence  
LLKAHNEQQVQYHQFQDQIQLMLQYLKQLRMFQLDYHLILHKQLMIIQHFLSKSTDLLSQ  
LLISK

>gene\_1605|GeneMark.hmm|140\_aa|-|8890|9312 >NVVL01000072.1 Rickettsiales  
bacterium isolate NORP64 Contig\_source1382A\_25088, whole genome shotgun sequence

MTYNIQDNLDGSM T LSVYIAYIEPRHCPTGGHTGKIRVFLKATDEASCDYDLENGGCTKI  
EWFEPD TDVWNITGLSFDG NVVATGSGFETNPEFSLFVIDGQAMPVQTATATKLTARIT  
NLKTN SHTEIFIFPQGGV PK

>gene\_1606|GeneMark.hmm|62\_aa|-|9433|9621 >NVVL01000072.1 Rickettsiales  
bacterium isolate NORP64 Contig\_source1382A\_25088, whole genome shotgun sequence  
MNACRFIPG SNGKDAGEYGLLFPGGPSGVYNMRLYHPIARAFKYSKKFVVEALITDIVGP  
DG

>gene\_1607|GeneMark.hmm|151\_aa|-|9736|10191 >NVVL01000072.1 Rickettsiales  
bacterium isolate NORP64 Contig\_source1382A\_25088, whole genome shotgun sequence  
MRLTGIGLPETMEEATAFNMIVIITDSAKRERDVDSNNLIACEISDIIESGII ECSFIPS  
EGCIDPESPGCSILEDES GTYIAVLFYGYDFLESFGDNLDNFVNSDI ELVGTSKKAGPNI  
RIFAFGGTFGSLETT SVSPVLKTEMIVQTTK

>gene\_1608|GeneMark.hmm|90\_aa|-|10234|10506 >NVVL01000072.1 Rickettsiales  
bacterium isolate NORP64 Contig\_source1382A\_25088, whole genome shotgun sequence  
VTDQDWDVDDRILTIEGTFGTLEHTLRF AHRDGVILSWTDTEITAFVNNPLAGAWGVEVI  
YPEGNAIIDTALLNCEIELFFHGPN SKII

>gene\_1609|GeneMark.hmm|91\_aa|-|10546|10821 >NVVL01000072.1 Rickettsiales  
bacterium isolate NORP64 Contig\_source1382A\_25088, whole genome shotgun sequence  
LIESSHDILSITFVSSLTNP LEGQSDTQWNAYMELEAVQSVTSFGHYDDSYFFRYVAIEN  
LKA IHDGGSDHLLVKITHMGVVVDAYCTNIA

>gene\_1610|GeneMark.hmm|162\_aa|-|10984|11472 >NVVL01000072.1 Rickettsiales  
bacterium isolate NORP64 Contig\_source1382A\_25088, whole genome shotgun sequence  
LIDIDPVTDNDEPFHF ELLSRHGSWTESESYTNYP SAGTLRNEIYNFGTLEHWDGEFRV  
YKNALTDGGFVYEFVLLRSV DISRTGDAEQLVIHGVRIVTDVEEGIVVLKNEEALVGRDL  
PAEFDIPEGEEDELYGLYTISNRPVQGGQLTRITFLDSFGDE

>gene\_1611|GeneMark.hmm|166\_aa|-|11539|12039 >NVVL01000072.1 Rickettsiales  
bacterium isolate NORP64 Contig\_source1382A\_25088, whole genome shotgun sequence  
LTDSPAITD SPPTGVTRKIWYGN DIDTWA EVDYENPQVEEY YGGAETIHYRNYYCEELDG  
IFVNPLAGEYRFYTSCDGSVDFFFNKGSTAFDELAIVADNSNKNSGFRSYHHTGDGEGTP  
FTFAASGEQSRFTFRHCHSTGDDYCSIGMEYQVLATEDALPTNPAL

>gene\_1612|GeneMark.hmm|154\_aa|-|12466|12930 >NVVL01000072.1 Rickettsiales  
bacterium isolate NORP64 Contig\_source1382A\_25088, whole genome shotgun sequence  
MGGADVEFTGQM FNPQTENN FVKIKSRESDDRARTFAQTYT LSGKDIFIYYKDEDISHSN  
AGLGKLVWRSPPLADLLGMTEPHHLNTS FSLWLEYR NHATTDITCNGGQGGCSYTSSWK  
TTPFNFGVIPHTFGYKQRVSAWLQGRHSASYKSD

>gene\_1613|GeneMark.hmm|42\_aa|-|13005|13133 >NVVL01000072.1 Rickettsiales  
bacterium isolate NORP64 Contig\_source1382A\_25088, whole genome shotgun sequence  
MQRKKYQALWVSALIICVLLMAATGKIGSLIFQRDELLLLTE

>gene\_1614|GeneMark.hmm|211\_aa|+|46|681 >NVVL01000073.1 Rickettsiales  
bacterium isolate NORP64 Contig\_source1382A\_25202, whole genome shotgun sequence  
MTYCDHSNQEEYPFKLELPFAKDAFAPHFTPETFEYHHEKHHNAYVTNLNKLDDANKEL  
TDLDLEGLIVRTNASNAAIFNNAQIWNHSFFWYSIKPGGGGKPEGEMLEAIEKDFGSYE  
NFAAEFKAAAIGQFGSGWVWLVYHNEKLMKTSNAETPITQGAFPLIACDVWEHAYYID  
YRNKRDPDYVSSFLDHMINWEFGLMHLKRATQ

>gene\_1615|GeneMark.hmm|210\_aa|+|933|1565 >NVVL01000073.1 Rickettsiales  
bacterium isolate NORP64 Contig\_source1382A\_25202, whole genome shotgun sequence  
MSIKLQSVIAITLLFLIYVVINLIYWKPNPINSNIECLQECVYKSPNRKTITLTSMMNL  
LEIKFIANSARTCFNPSFPIIHIKTKSDHNAWIHIVRTDAAAEEELRFFIDTDKKFTPFYN  
FNEDFYDAPFWYYGIFNKPLSFWEHAYAVKVDHDSKTITCMGGIKWGFKLQYFSLPKPM  
IDPISLHEDWKKDWLFFSKSLTGYTLKVN

>gene\_1616|GeneMark.hmm|113\_aa|+|1859|2200 >NVVL01000073.1 Rickettsiales  
bacterium isolate NORP64 Contig\_source1382A\_25202, whole genome shotgun sequence  
MFEFIEFASAIRALYQYVNDDELVEEDFWLITEEQRKRLPKEDQGTGVWYMLNPKQKKDQN  
SVFLVDKAEKDLIRAVAFIKSSAKKLPEASFLKLLYCKKTLPPVLFKLES

>gene\_1617|GeneMark.hmm|96\_aa|-|2267|2557 >NVVL01000073.1 Rickettsiales  
bacterium isolate NORP64 Contig\_source1382A\_25202, whole genome shotgun sequence  
MAKKQAEKENVELTLEALYDVPVQVSVVLGSTMPLSNILKLSRGAVIELERTVGEPIDV  
YVNNKKVAKGEIVIVDEKIGVTLTEVVVNEKDFQSA

>gene\_1618|GeneMark.hmm|306\_aa|-|2573|3493 >NVVL01000073.1 Rickettsiales  
bacterium isolate NORP64 Contig\_source1382A\_25202, whole genome shotgun sequence  
VSKKHKKFEFEDLPKANVVNSNTHAKKTEADELINDAVTGHLNKIVDDKKEDSDPDDDDSD  
SGGSNLAECTNPAGENAAQTPLPATGIQAPSPQLDGAASAPGTGAGAPSGASEGVASGTG  
AGGSAAQPAAEGAPQEPSTAQAEPVQGAAEQTAPEGAGTAAPQVGVDFAKLLEEKLSAIL  
PEVDIGAQIAKASAESSIVKLLHLILPANFEEIIVNGLLEKLLKFFYKEGSITLTIHPD  
RYDFCTKALQAEGIKDRFKDSFTIHKDDTLGTDDCKLEWGETKLEYNQEQLASEIDRIIE  
QLKSAT

>gene\_1619|GeneMark.hmm|339\_aa|-|3509|4528 >NVVL01000073.1 Rickettsiales  
bacterium isolate NORP64 Contig\_source1382A\_25202, whole genome shotgun sequence  
MGIEVKDIAKLTATQKVAIVLLSLSDNATRIFSLMSEEEITDISHAMSNLGSVAPEAVD  
SVMDKLSTD MAGDSTFFGNLDNTERLLQKILDKDRVDALIDEIRGPQGKNTWEKLANVNE  
ELLALYFRNEHPQTAALVLSKIAPDHAAKVLSNLPDSFAFEIISRILSMGSVKKEVLERV  
EKILRAEFISSVGKTQKYDSIERLVGIFGNLDRSTEVKFM TMLESNLPEAATKIKDMMFT  
FDDLKIDSKGIQRLLRDVEKSRLTLALKGASDELKMMVFSSMSQRAAKIIEEDIMSLGS  
VRMKDVDAARFDVVSVAKGLIENGEIDVSLDNEEEEFVT

>gene\_1620|GeneMark.hmm|544\_aa|-|4528|6162 >NVVL01000073.1 Rickettsiales  
bacterium isolate NORP64 Contig\_source1382A\_25202, whole genome shotgun sequence  
MQVLIQFLKEMSPAKLAAIAVTILASIIIMFILFLSKVGEDEFVLYTDLDLQDSAKIAED  
LDTRKIIYKAMFDGSTIKVHKSEVASTRLALAQSGLPNAGSIVGYEIFDKEDSIGATNFS

QNVKLIRALEGELSRTITSFDQVSRARVHLVMPQREIFSKERLEPKASVVLKFRGGRRLS  
KSGIDAISHLVTVSVPGLEMKNITIVDTKGKPLKIGSSEENMDFASSKNEEMRIGSENRL  
RGMIEELLSHSFSGKVKKAQVSLEMNFDREVVTNSEIYDPEGAVIRSVQSVDEREKTPVSS  
GGGGDVSVANNIPGGDSGGGGAGGNFATTEKSDQTTNYESKTIKHNHISESGVVTKMSIG  
ILVDGNYTTDPETQEVSYSDRSKEDLDKIVSLVKVATGFDDDRGDKIEVINIRFSSNLEP  
FDDDEVDWVMEHLPNLFQVLIFAILVFLVLITVIKPVALKAFEVKNQADMDSIIDAAAG  
GIPGEGGVSGGVVAVSADGTPVEGAASETVPVKISPVTKINELADSNPEDLVSVLRKWL  
NEDH

>gene\_1621|GeneMark.hmm|118\_aa|-|6243|6599 >NVVL01000073.1 Rickettsiales  
bacterium isolate NORP64 Contig\_source1382A\_25202, whole genome shotgun sequence  
MSDEIKEYLEPGKKNLILYMLYLCGVLPVLLPIVGGVFAYANQNNEDIWKSHYIFAFR  
SAVLGVLGMLSMITAFIFIGVIFYMVVVIWFVVRISILALQYLFEGKAHPNPMSYWIW

>gene\_1622|GeneMark.hmm|888\_aa|-|6609|9275 >NVVL01000073.1 Rickettsiales  
bacterium isolate NORP64 Contig\_source1382A\_25202, whole genome shotgun sequence  
MSINSESKYAKELELDGQSYHVFDIRQAARDSDFDLGLSPYSLRVLFENVVRNGAREKEM  
GAFKTWLKKNSSQDEISFSPARVLMQDFTGVPVPAIVDLASMRGAMQTLGDSPSKINPVIPV  
DLVIDHSVQVDSYGNKGSFNKNVEKELERNGERYKFLKWGQSSFSNFKVIPPVGTGICHQV  
NLEYLAQVVFIDEKDGKKTAYPDTLVGTDSTTMMVNALCVLWGVGGIEAEAAMLGQSLP  
MILPEVVGFKMVGSMGSGITATDLVLTVTQMLRAKGVVVGKFEFFGEGVKNLSLADRATI  
SNMAPEYGATCGFFPVDEETLKYLRRLTARDEHKVKLVEEYTKIQGLWDDNTPEYSDVLE  
LDISTLEPSLAGPKRPQDRVALSDMQNNFKEELPGFAGTGADISAKHKVSTGEFAIGHGD  
VVIAAITSCTNTSNPSVMIAAGLVAQKACELGINVKPWVKTSLAPGSKIVTEYLNKSNLG  
QYLDKLGFNLVGYGCTTCIGNSGPLDNIIDEVIREKLVVASVLSGNRNFEGRVHHPHVMA  
NYLASPPLVVAYALAGTLNIDLKDPGQSESGVDVYLKDIWPSREEIQYVEDCVDSQM  
FAEKYKDVFKGDEHWSAIETSEGETYDWQESSTYIQNPPYFDNIDKPPLPLENVNARIL  
AMFGDSITTDHISPAGVISHGGAAAKFLISEGVSVDGDFNSYGSRRGNHKVMMRGTFANVR  
IKNQLCEGVEGGVTINHLGSKQETIYDAAMDYRANAVPLVIFAGKEYGMGSSRDWAAKGT  
NLLGVKAVIAESFERIHRSNLVSMGVLPIAFNSGTSWKSLLNLKGDEEITIMGMSDDITPY  
QPLTCVIKRNKSDNNETINVTLQIYTANEVGYIKHGSILGAVIKTLTN

>gene\_1623|GeneMark.hmm|199\_aa|+|9450|10049 >NVVL01000073.1 Rickettsiales  
bacterium isolate NORP64 Contig\_source1382A\_25202, whole genome shotgun sequence  
LGNREVFKDLSLFLPSSIIYIKGANGSGKTSLMRMLAGIQTPSSGSITFDREALPISML  
EKPYCTYIGHKVGIKPELTALEHLEFWAKLYDSAELIDAAIYFKLEEIIDKKCYELSAG  
MQKRVALARLIASPAKLWLLDEASSNLDSDNRQLLLNLIITHANNGGITFIACHNEPEIK  
TAQVLDLAEFLPNLEENKS

>gene\_1624|GeneMark.hmm|212\_aa|+|10046|10684 >NVVL01000073.1 Rickettsiales  
bacterium isolate NORP64 Contig\_source1382A\_25202, whole genome shotgun sequence  
MKSLILQEFRVQDKIYNLIKYSLIFFIFCSLSITLINSYENVQIFGVVFSVICIPLAFIN  
LSAGLIKPDIEDGSLEILLAKTPIKIVMAKYIALFTCFCLSFAMLLPLIYIYNIPNTI  
FILIAASGFLLSLCAALAVLIASIQGYFRANTNFLSIIMPLVIPSIIILSGIIIQNPDN  
LHLLAIMIGINLIVIPPSIYLSGYLVENIYNI

>gene\_1625|GeneMark.hmm|110\_aa|+|10862|11194 >NVVL01000073.1 Rickettsiales bacterium isolate NORP64 Contig\_source1382A\_25202, whole genome shotgun sequence  
MVLFFVYGLMGKWLIAIMITALTVTYFIFKGLDEAGVIKGAEDVVFVKVFNDTKSIAQHCTP  
LITNLNDFWYCIHPPTYTPSEEEAALRSGALNLIAPENSNDIKDPYAE

>gene\_1626|GeneMark.hmm|178\_aa|+|11293|11829 >NVVL01000073.1 Rickettsiales bacterium isolate NORP64 Contig\_source1382A\_25202, whole genome shotgun sequence  
MTDETSSDKPKDTRRDFVTLTASGMTAIGAACAVWPLVDSFNPSADVLALSSIEVNLAP  
VEEGQTLVVKWQGKPIFIKHRTEAEIEEAEMTPMKELIDPEADSDRVKPGQSKWLVTIGI  
CTHLGCVPIANKGEYDGFPCPCGSHYDTSGRIRKGPAPLNLAVPPYEFISDTKIKIG

>gene\_1627|GeneMark.hmm|406\_aa|+|11831|13051 >NVVL01000073.1 Rickettsiales bacterium isolate NORP64 Contig\_source1382A\_25202, whole genome shotgun sequence  
MSTPESNDKQQSGIIAWIDYRLPIFSAMKHLGEYKTPKNLSYWWSLGSIAGIALVIQILT  
GIVLAMHYTPHVDHAFDSVEKIMRNVNYGWLIRYMHAVGASMMFFVAVYLHMFRGMYGSY  
KAPRELLWHFGLIIFLAMMATAFMGYVLPWGQMSYWGATVITNLFSAIPVVGDSIVTWLW  
GGFSVDNPTLNRFFSLHYLLPFVIVGLVLLHIWALHVHGSNNPTGVKLLKKKDMIPFHPY  
TIKDFVGFVGYFLIFAYFIFYKPNLLGHPDNYIPANPLVTPAHIVPEWYFLPFYAILRAV  
PSKLGGVLLMFGSIIILFFLPWLDKRSKRSATFRPIYKWAFFVVDCLVLGYVGGMPAE  
EPLYTISRLGAAYFFHFLIVLPSIARFEKPLPLPHSVEEEDENPH

>gene\_1628|GeneMark.hmm|318\_aa|+|2|958 >NVVL01000074.1 Rickettsiales bacterium isolate NORP64 Contig\_source1382A\_25374, whole genome shotgun sequence  
KHPRINTVTLCEYSEYISFFFKGIFRDYSLITKIHVTSFFIGYYLNFYMKAIKLSFVL  
IIFLTTSLFALDSAFASKRRTLVIAGDYWCPYNCHPDSKMPGYLVELATRALHIYKIDIE  
YRMMPWTKALKEVKKGNIDAVIGLTD FEGNGLQTTRVALEYTQSSAFTRTDSKWVYDGVR  
SLTRKKGIIIGYAQSEEINNYIGMNYITKPDFVMEGGKNAVIDSIANLIDGDIDVCIG  
DRRVFNHYIKENGLEPYIREAGKIDKIKHPLYIAFSPKTLHIDQYIKCLEEGLAALKATG  
EDDYLRQKYKISRKEHDL

>gene\_1629|GeneMark.hmm|181\_aa|+|948|1493 >NVVL01000074.1 Rickettsiales bacterium isolate NORP64 Contig\_source1382A\_25374, whole genome shotgun sequence  
MTYKLLPYRQSTPRVDSTTFLADGCAIIGNVTIKSNSSIWFNTVIRGDVDRISIGSNTNI  
QDLVVIHTSRKDGGYVDIGDNVTVGHSALLHACSIEDNAFIGMQSIIMDESIIEHAFIA  
AGSLVPAGSIVRSKELWMGRPAKYVRMVTDAELKFMEENARHYVELSKEHQLARDEPLNE  
|

>gene\_1630|GeneMark.hmm|461\_aa|+|1536|2921 >NVVL01000074.1 Rickettsiales bacterium isolate NORP64 Contig\_source1382A\_25374, whole genome shotgun sequence  
LGGIQADINTIHLEKVFNLDMNFGLNIYKREIGKMLDLLIGLSAPAELSGTLIEKVTS  
EDIRLINLDIVRKNYHELKKAFFYAVSYTAVKANS AEGILELLNEEGASFEIATIEELRK  
SIKRGISPERIIFSHPAKDAIEIAESFKIGVNR FASDSQEDIALIAKHAPGSKVMVRIKT  
SHEDKNHNSLTGFNERFGVTPAAATNLLRSLKSLGLEPYGVSFHVG TQEEDVNAWDWAIM  
RAASIFKELKNEGTELEVLDIGGGFPSRYKSKIPALSEYGEAIHRSINKHFSGALPQKII  
IEPGRAISAMAGITFGRVINVKPCEHDDSRIVTLSTGKFSAGL FNVGNGMFFYRKTSSG  
KMKNLSGASSKKADIHGKGGASFDRPIEGDDICMPGDLKSGDIVIFTGTGAYSGEMTTNW

CAKSPRRTITLSNNAEMEPLHNTLSAESPTDETAPSPALA

>gene\_1631|GeneMark.hmm|308\_aa|-|2985|3911 >NVVL01000074.1 Rickettsiales  
bacterium isolate NORP64 Contig\_source1382A\_25374, whole genome shotgun sequence  
MSAGRMDENSGILSDAINQPDAILLASLFDAGDGDVEEVKSLDNGANANGVGRGGSTP  
LLKATGNRYLNREVSTIQEIVKLLLDHGADPTIADEEGRTPLHEVSVRSARNFQIRKEED  
SQKVSDNMQAIQDMATSFIKLGASVNSPDKRSDTPLLEAVSQGSVGLVKMFLENGALVNQ  
AGHNGETPLSIASEERHIEVVKLLKAIAYIQVKALHELIPGVTVELLKLTVLTTTPWYI  
KPNIDIDISGDLNRYGTPPQETEFRGSSETCSLITDLEEQAGFADNPAATMDTPPLGGLD  
DGTDDAVS

>gene\_1632|GeneMark.hmm|62\_aa|+|4472|4660 >NVVL01000074.1 Rickettsiales  
bacterium isolate NORP64 Contig\_source1382A\_25374, whole genome shotgun sequence  
MLYVFIIFAILTTVTLGLVLSMAAGEKFSKKGTKLMSLRVFLQSLLVLSLAIAYLSQ  
PL

>gene\_1633|GeneMark.hmm|76\_aa|-|4775|5005 >NVVL01000074.1 Rickettsiales  
bacterium isolate NORP64 Contig\_source1382A\_25374, whole genome shotgun sequence  
LLSSYFIHFYVFFIANIPAGLSGLIFNLLKSCENPLTYTQMLGLGVVVKFYFNNYGLVF  
LPIHKRYAGFRGALIF

>gene\_1634|GeneMark.hmm|392\_aa|+|5209|6387 >NVVL01000074.1 Rickettsiales  
bacterium isolate NORP64 Contig\_source1382A\_25374, whole genome shotgun sequence  
MFRQMPVILALIIIVIIISFGDYIPQALASLLFGISLSIKSLIIFLLPVIIIFSLLYKATIS  
LAKDASKIITIFLGVIGSNFLTTLTSLQMIGMWVYGFDISLIMPSKESTLPASDLFLLPS  
IIPNYLAMIGGIIAGVASTQMAPNLAINIGAKLERITGWLLQIVTLLIPIFVTGFVVKLQ  
YDGVIMQIIKDYTVIFVIIASAQFGYIAFLYFALSFRVVKPAVSSITNMLPAAFSGFSTM  
SSAASMPMTIAGTEKNAKDKDIAHLVVPASVNIHLIGDCVAIPCFAFAILKNYDMVQPD  
FAYFIFTCYFVLAKFSVAAIPGGGIIIVMLPILEQYLGFAEMLSLITALYILFDPVITSA  
NVINGAFAKIDLLLYKKAKYTKKLIHEELG

>gene\_1635|GeneMark.hmm|149\_aa|+|6384|6833 >NVVL01000074.1 Rickettsiales  
bacterium isolate NORP64 Contig\_source1382A\_25374, whole genome shotgun sequence  
MTFKLDKTLEKDSKFVMDLELSQVRLINNSDFPWWILVPRREDIIEITDLEEDDYTKLME  
EIRIVAGGVQEEFTPDKLNIALGNVVSQMHFHIIARYQNDELYPKPVWGCKFTNYGDMQ  
MQKRIRSLKNTIATRALREDGEIATNSEK

>gene\_1636|GeneMark.hmm|393\_aa|+|6871|8052 >NVVL01000074.1 Rickettsiales  
bacterium isolate NORP64 Contig\_source1382A\_25374, whole genome shotgun sequence  
MIKNLPFLLVISLLTGCEVDISVPSFPDISDYFDISDALQMTIAINFLGFCISSIVYG  
PLSDFGRRRVMMVGNFIMLIGAVGCVVATSIIEFLFARFIQIGASTSAVVVFAMIADT  
YSADKSAKIIIGTMNSLITVFMSLAPIVGGLINESIGWRGNFFTIAMLSIVSWIMLYFWLP  
ETKKHFTPFSTRKILQDYKTLFFDRSFTYASLVPTLTFAGYISFIACASFLYMEAYDLPI  
MHYALHQAIIAVFSVVSLSYSGDVSKFLGERNCVIYGMFLTAGSSFMLMVALLSNKSPY  
LTTLSMMIYGVGSAISYPVVFARSLEIFPDISGSASSVIMAIRSLMCAAFIALSSYLYAG  
KLVSVVALVILLAATIAAFLSSRLLKLISFDNT

>gene\_1637|GeneMark.hmm|185\_aa|+|8065|8622 >NVVL01000074.1 Rickettsiales bacterium isolate NORP64 Contig\_source1382A\_25374, whole genome shotgun sequence  
LRFEINYIFVSFVKKQIVYPDFIPRVFAMTIDIAILLYVWVFITPVLNIATHQVFVYIFQ  
DFFLLYSIDMSDAKAVAATIYHPAFSEYVSAPKFLAYFGYLLFVNTVFLGSYFITFWYKF  
GATPGKMAMKMKIVDANDYSKPPLCNLVKRFFGYITALIGMWSILFSRRGIALHDKIANT  
VVIKS

>gene\_1638|GeneMark.hmm|310\_aa|+|8767|9699 >NVVL01000074.1 Rickettsiales bacterium isolate NORP64 Contig\_source1382A\_25374, whole genome shotgun sequence  
MHNVFYSVLPIFLIALLGSVIRRKYLTSDEFWRGLEKLSFYILFPTVLFYSLKVDLTSS  
EFFKLTVALIAANLITIMLVYQMKTDYDGVQFTSVFQGATRYNNYIFFAIGAALFGES  
GLSIIATISPYLLILTSVTSIMSFTHYVPNSAGKKTLRNNLVLMMKSIIASPIIIASVLG  
MSFNFYQIELNIGILNTIHSASSALAIIGILVAGIKLKLKPEHLKQVVLASSVKLILM  
PVVTFIALVALDITGPAKSIAILFSCLPSSSSYILSRQLGGDPETMSSIITFTTIFSIL  
SLSLLVYILG

>gene\_1639|GeneMark.hmm|773\_aa|+|9748|12069 >NVVL01000074.1 Rickettsiales bacterium isolate NORP64 Contig\_source1382A\_25374, whole genome shotgun sequence  
MSDTKSADANTKSAEYIEALEYHQNGQPGKIALKPTKRLQSQKDLALAYSPGVAAPCLEI  
QKNPDDIYKYTAKGNTVAVISNGTAVLGLGAIGAAASKPVMMEGKAVLFKKFADIDCFDIE  
VDCTDPEEFINIVKHLGHTWGGINLEDIKAPECFIIEAKLKLMDIPVFHDDQHGTAIIT  
AAGLINAAFITNREMSEIKIVVNGAGAAAMSCINLAISLGIDKNNVILCDTRGVYIKGRT  
EGMNKWKKEKAADTKHRTLEDAMKGAADVFLGLSAKGAVTKEMVASMAPSPIIFAMANPDP  
EITPEDIKLVRDDAIIATGRSDYDNQINNVMGFPYIFRGALDVRATCINEEMKIAAAKAI  
AALARKPVPGEVYKAYGSGRKSFGADYIIPVFPDRLITTIPVAVAEAAIATGVAKLKNI  
DIKKYKAELASRLNPTSTYMHFVYEKIQAELQRVVFAEGEEEEIISAMMMRDENYGT  
IIVGRSSKIDPIVESMGEEYNLDNIMVMNAAINKNLTKYIDYLYSKLQRKGYLYRDCARM  
VKNDRNVFAACMIACGDADAMVTGITKSYNSFDDICKVIKPEGKRIMGYSIMLSSKH  
IIIADNTACELPDAQDLVEITLQTAKAAKSMGFKPRVALLSFSNFGNPHKEKTARVRDAV  
SLLDKMDVDFEYDGEMTVDVALNSNLQKIYPCRLTAPANVLIMPGLHSASISTNLEE  
GGGIFIGPILNGFEYPVQIIPMGSSANDILRIAFAEAINSKNEKTEEKQV

>gene\_1640|GeneMark.hmm|64\_aa|+|12041|12235 >NVVL01000074.1 Rickettsiales bacterium isolate NORP64 Contig\_source1382A\_25374, whole genome shotgun sequence  
MRKPKRNRFERGEDNAGFEEAVNAMIWLIHYKTGEGNESFAIYDVYGCAPIIEGSFNSR  
LYRD

>gene\_1641|GeneMark.hmm|109\_aa|-|1|327 >NVVL01000075.1 Rickettsiales bacterium isolate NORP64 Contig\_source1382A\_25997, whole genome shotgun sequence  
MGTIMHFNLDTIVITVFLAIITVVGVVAGFGVRTIKDYALGGRNFSTPTLTATITATWIS  
GIFFALHTSGIYKDGWVYLVAGVGDVLYLFIIALIISPMAEFFDSCSV

>gene\_1642|GeneMark.hmm|53\_aa|+|869|1030 >NVVL01000075.1 Rickettsiales bacterium isolate NORP64 Contig\_source1382A\_25997, whole genome shotgun sequence  
MAKNNIRLVAVLYSDKHRAYIIYFYQFWLKKQFTDLIIVHLSFQRIKLEKIKN

>gene\_1643|GeneMark.hmm|137\_aa|-|1299|1712 >NVVL01000075.1 Rickettsiales  
bacterium isolate NORP64 Contig\_source1382A\_25997, whole genome shotgun sequence  
MYLLDSCAISDFMKGDKNTSEKLSILPSEIYTSTITQMEIQYGLIRRFDHSRYFGILE  
DFLSAITVLPFDRSAASHSAKIRKTLDSQGTPIGAYDVLIAGIAMSANLTLVTSNEREFL  
RVDGLEIENWRTKKCR

>gene\_1644|GeneMark.hmm|77\_aa|-|1745|1978 >NVVL01000075.1 Rickettsiales  
bacterium isolate NORP64 Contig\_source1382A\_25997, whole genome shotgun sequence  
MNINIYIEEPVGRQLSEYSKKFKRKRNSIIREAIKNWLTNHSTKQWPESILRWDGIEDFP  
SIKELRSGLIEPNKKLF

>gene\_1645|GeneMark.hmm|175\_aa|-|2049|2576 >NVVL01000075.1 Rickettsiales  
bacterium isolate NORP64 Contig\_source1382A\_25997, whole genome shotgun sequence  
MKKLASFITLSIIILLSGCYAVETSHEYNRFTWAKSTSKPIYLRFKDTKSKPFYFLLS  
RNTKENGYKLVIRWKNKASGDLLFNGNKTTLKFIDKEIILTFKPIKRPKIVSYNMNSGT  
HEEEGIFSLSEKEFTRIAYATSVMTTELTGRYNTVMGEFSSRNTKKAFRNFAEKSH

>gene\_1646|GeneMark.hmm|80\_aa|+|2892|3134 >NVVL01000075.1 Rickettsiales  
bacterium isolate NORP64 Contig\_source1382A\_25997, whole genome shotgun sequence  
MFYVYLIRSINFPDQVYVGITEDFKRRLKTHNSGGSVHTAKYRPWDLVVYMGFKNEIKAR  
DFEYKLSGSGRAFSKKRLW

>gene\_1647|GeneMark.hmm|403\_aa|-|3297|4508 >NVVL01000075.1 Rickettsiales  
bacterium isolate NORP64 Contig\_source1382A\_25997, whole genome shotgun sequence  
MLILPIMNIIVQKFGGTSVADTARLEKVANIKAELDSGNAVIAVVSAMVGVVNSLISK  
NALSPLNSAAHMREYDAALASGEVVTALLALQLQKIGIKAQSLQGWQIPLKTDGTHGNA  
QITEASPALLKDMLAEGITPVITGFQGIAPNGAITTLGKGGSDTSAIIAASLEASRCDI  
YTDVEGIYTADPRVVHDAKKIGVINIDELYALCINGAKILHPRAALAAKRYGFPIRILSS  
FTDNTGTVTQIEKLDMENKIVKAITSNKNLLKVNVEYQPRQLSGILQKLSEESIEIEQIY  
NSCERNSSIITNLTDKNKCKLLDSLKSASALKEYSLNSNISTVTMVGYGKSDTKLTWK  
IMDVLMNSNDVQVLSVHSSDVTISMLINDADNEKTIKLLHDYCF

>gene\_1648|GeneMark.hmm|247\_aa|+|4595|5338 >NVVL01000075.1 Rickettsiales  
bacterium isolate NORP64 Contig\_source1382A\_25997, whole genome shotgun sequence  
MSEKSSINQHELNFNKTEQEWWDLAGEFKLLHKINPVRIEYISSVIGKQFPLAEANSPF  
SDLKILDVGSGLICAPLCKLGAKVTGLDANAHTKASSEHAKRNNLDIEYIHKTAEEH  
VKSSPKYDVVLCLEVVEHVANPKEFVLNLSKMOVADGGVLILSTINRTVKSANAIHMAEY  
VLGWVVPKQTHDHSKFKPSEFASMLEGSLRLSELKGLSLSMLSQEWHLSDDDIDVNYFAS  
FVDDKKL

>gene\_1649|GeneMark.hmm|402\_aa|-|5438|6646 >NVVL01000075.1 Rickettsiales  
bacterium isolate NORP64 Contig\_source1382A\_25997, whole genome shotgun sequence  
MGLTMGNSLVGAASRQIGADNLKSDDLGQSMATGANKRADVVDLFLGNSLRDAEVVLT  
ANSTNYSKNMLEITDKYLSTLAGSLQESLQITIGSAGPLSGEKRAILQQLVDDKKTQVGLL  
IKTADFDGKSLSGDIKDLGVQVGLASSDKLFLNATDISGGKLWRTSATNLIQAQMKAN  
GTAYYATQAEADADAGKNINLLSALQNNNAVGTGATGSGAVAMTDTELATLIDAVRTGNT  
SFSSSLNEMAPITLAQIEIANGGDTFADSSIANLAI AIAAGGSRAELEALFGDDVTIDIS



DPALTVNLTVANVFTTALNTIRIEQASIANQGSNIAEADALLATINVTQRAADSYTMT  
DYVTTATEYSETIRTITSALSALQAANKIPEAAQELVRSAR

>gene\_1650|GeneMark.hmm|79\_aa|-|6913|7152 >NVVL01000075.1 Rickettsiales  
bacterium isolate NORP64 Contig\_source1382A\_25997, whole genome shotgun sequence  
MSYLIANETQNTLNKLIDEVALSHKPQIIKGRNSAVIISVEDWESIQETWMIVSNQKLS  
DSLKINMKTPFEESKELY

>gene\_1651|GeneMark.hmm|165\_aa|+|7339|7836 >NVVL01000075.1 Rickettsiales  
bacterium isolate NORP64 Contig\_source1382A\_25997, whole genome shotgun sequence  
LGAVYMENKISDIIETISDLGFNLVKVSIHGLGTKIVEILIERQNGERVEVGDCQKISR  
DIGALLDVEDVISGKYFLEVSSAGLERPLVKLDDFERFVDREIKICLRVAFNGNLKYKGG  
LLGVDGDKVKLQSKNVELSFPYDNIIRKANLVFTDEMFRALLNKKK

>gene\_1652|GeneMark.hmm|512\_aa|+|7853|9391 >NVVL01000075.1 Rickettsiales  
bacterium isolate NORP64 Contig\_source1382A\_25997, whole genome shotgun sequence  
MDNNVAKAEILQIVESVSRERGIPIKANLIEAMEEAVQMAGRKKYGIEHNISAKIDQNTGK  
ISLFRVREVVEQAEDTFKQIELEEAMLRPDVQLGEEILEPLPPIDLGRVAAQAQAKQVII  
HKVGEVERIRQYEDYKERKGDILNGVVKISIEFGHIIVDLSRAEGLRRNQQRGEVFNVG  
DRIKAYVQDVRREPKGSQIFLSRTDDNFLKLFEMEVEPEIYDHVIEIRAIAREPGSKAKI  
AVFSSDRSIDPVGSCVGVGRARVKSITNELAGEKIDVINWDDNVAQFVINCMTPAEISKI  
VFDETQYKVETIVAEDQLSLAIGRRGQNVRLASKITGWRIDVMTEQESTRRSEEFARTT  
ELLVSTLEVEEMVAQLLSAEGYGSIEQIAAVEDSVLSAIDGLSEELVAEIKNRAITYIEA  
KDEKVIEELEKLGVDQEIIDALDLPAEYLLKLAEYGVKTIEDLGEMSVHEFRIRVPSVI  
SKEDIEALIAFAKEQDQGENQGDQGGQEDASN

>gene\_1653|GeneMark.hmm|377\_aa|+|9487|10617 >NVVL01000075.1 Rickettsiales  
bacterium isolate NORP64 Contig\_source1382A\_25997, whole genome shotgun sequence  
MTDNQDTKKIKKLTGKPKISLRNKSAYPKRSAAAPGVVVVEVKRGRVSADGGMGIKDAK  
SLEPDQAQLNRMLDTLKKSNDDAGPDKASISTLSKLAEMNQVPEPQADTKEDVAENTGSD  
DAKKTGKDGEHAVKGGKPAAGTDKTSCHKKEFTKQPPSVVAPAKLNEKEQEAKEAPSKP  
KIIEPKLLKKTDIINMLDEASGAAPFKTRSLASIRRARSKDRRRTGTVQAQKVYREVIL  
PEEITVGELAIRMTERASDVITRELMKLGVMANNAQFIDADTAELIITSFGHKVKRVKDS  
IEDVLTKEYEDKPEDLKPRAPIVTVMGHVDHGKTSLLDALKSTDMAAAEAGGITQHIGAYS  
VTMSDDRMITFIDTPGH

>gene\_1654|GeneMark.hmm|96\_aa|+|3|293 >NVVL01000076.1 Rickettsiales  
bacterium isolate NORP64 Contig\_source1382A\_25999, whole genome shotgun sequence  
KDVLLLEEDIFKVRMLIFDVENIKYGELENLIVNCQFAIYEFCEWEDANNITLLGEFSER  
KEYQYELLNISRYFDDIENKSKIIENVIGARSGT

>gene\_1655|GeneMark.hmm|437\_aa|+|543|1856 >NVVL01000076.1 Rickettsiales  
bacterium isolate NORP64 Contig\_source1382A\_25999, whole genome shotgun sequence  
MSKISYEKLGDIYALYKPVKSRFVWCRVRVDNHPAIAKEIRKSLKTEDKNRAIYEAQKIAL  
ETEIKIKENIDLMTSKPKAWKIAEKAKIRLERAKPAKPTYPGYIRILEKEIIPFLKELDK  
NITEINRYTVEDFFDKYEKNSKTQVNMSKTCFKRVFEGLREQWIEEKNIPKMPKVEIKE

TEEKRNFNEEELATLHKRIDEYIGNSRKSVSKENRFLKCMMLFLEASGARTGEECKIK  
WDDLEVIKKDGKAVMCKISKGKTKGKGRKIILDGQAIEAIELVFNYQLKGIEKIEKVV  
KTPFFEYDYSDNRIDFFDFIDEAKKKLSGFHIFERKDRKEIDFSKTFELYIKWLREEEL  
IGNKNHTLYSFRHTFITSKLMEKEEKRRWTAEQVAKHCGNSLQMIWDYLLHLQAEDTIFN  
FDYYIELRNKTEKITGA

>gene\_1656|GeneMark.hmm|122\_aa|-|1889|2257 >NVVL01000076.1 Rickettsiales  
bacterium isolate NORP64 Contig\_source1382A\_25999, whole genome shotgun sequence  
MRRNMSSYLKKSLLAEQLQKELEELSKNEDAKKEKQFFEDLKSVLDEHEYSFHQLHSMLS  
DVLEFEKPTKKTTRKSAWQGLEIEYEGSIYKVN SIGRQPAQTKELLSIEMTPTEFIERF  
KK

>gene\_1657|GeneMark.hmm|76\_aa|+|2316|2546 >NVVL01000076.1 Rickettsiales  
bacterium isolate NORP64 Contig\_source1382A\_25999, whole genome shotgun sequence  
MEDLQEEIERTNKILVLMQLKLNINMNLINNVLEYPEFGIKTNEKETKEERLKRFLSFI  
DELENENGKKTNRPTK

>gene\_1658|GeneMark.hmm|397\_aa|-|2669|3862 >NVVL01000076.1 Rickettsiales  
bacterium isolate NORP64 Contig\_source1382A\_25999, whole genome shotgun sequence  
MAINIILGTTGDGKSYTAVDKWIPTITKQKRKVITNIPLHIDELKKSFPDINFDELLEI  
RQGTNGEAYDAFQTADDFQDENWVNDKGQKPLIVVDEAHFCLGNDRPARELKPIEDFFAL  
HRQMGYDILLTQTQKFSRRTLGLVKHFYHCSKLSVVGQSNRYALRIRQDGSKSSIIQ  
EEIRKYDPEIYKFKSHAKSDGEVQEAVDTNVKSFHKHPVYGIAPFFIFLWWKGWL  
NFNIFSATTKTSENTKNLERTQNSPILSNQSTVSSQEVVQKNKQIKALNGEVEELKNHNK  
ELAKALEKIQSHPFTASNIKIGSSWMPNSQSKFVFS AIVEGPNGNFSTNSKSLKKIGYD  
IEYDSCLYRWTFKEFNGYWTCGVSKDQKRLSENMKL

>gene\_1659|GeneMark.hmm|103\_aa|-|3886|4197 >NVVL01000076.1 Rickettsiales  
bacterium isolate NORP64 Contig\_source1382A\_25999, whole genome shotgun sequence  
MFQDLMDWFEQVFDDVALTFFAMLSDLFSFLFDVITKAFLVLDLALGLDFMNPLQYIS  
MIPDSTLNMMGVLGISEAMSIISATGIKLLMQMIPFVGLGSK

>gene\_1660|GeneMark.hmm|475\_aa|-|4213|5640 >NVVL01000076.1 Rickettsiales  
bacterium isolate NORP64 Contig\_source1382A\_25999, whole genome shotgun sequence  
MVRIISFLSLILFSSFSFAEINRTDYENIDITFSSGNTSLDQFNFNDPMIACSVALEY  
THPQNEYSGASSINWALVIHREYDDQPDSWDLGCNYYNTRRGYSSSMYVRSNEFPQQDGK  
FTSSFDSSNYIIFESAGSVSTEPEIPETD TDGDGIPNIEDLDIDGDGIPNEQDDDVDGDG  
VPNYIDNTPYGEYTEVPGYDDMDGDGIPDSTDNDIDGDGIPNYIDSDPLSDINKD TDGDG  
IPDNQDLIDDDGFINEEDDDIDGDGILNGEDNDIDGDGTLNNQDSDIDGDGIPNYQDDD  
IDSDGIPNYIDNSPNGWNVNSPEDGPTYCLIGGFYMGRGDCSNYATDENG DGEYTTDEVN  
DPDSLIPDQVPIDSQPDSPAILETGYWTPYDPGFSGVLLDFKKEIEKSKFMEFLDSFRF  
TNDGTVPVFTFNFDIGIHDFGIMSIDPDQFLPGVFGFLKVIVLISATLFAFRIVF

>gene\_1661|GeneMark.hmm|108\_aa|-|5634|5960 >NVVL01000076.1 Rickettsiales  
bacterium isolate NORP64 Contig\_source1382A\_25999, whole genome shotgun sequence  
MKRAILFFIIFAVGFAVGKARAFPVYHGYTDDPLTQKEYCEIYYPKSTVAKSEKDFLEKY  
FIDYSNIPASPLYLQDMTIAFELPCFPEKTSDDLQERIKLYEKGETW

>gene\_1662|GeneMark.hmm|79\_aa|-|6193|6432 >NVVL01000076.1 Rickettsiales  
bacterium isolate NORP64 Contig\_source1382A\_25999, whole genome shotgun sequence  
MNSVKEKMLNKYNQAGIVAGSLILANSAHATETSNVEQLFNSVDMGGVATAVVTIGGTVL  
GIFLAYKGITLVKRAISKA

>gene\_1663|GeneMark.hmm|78\_aa|-|6480|6716 >NVVL01000076.1 Rickettsiales  
bacterium isolate NORP64 Contig\_source1382A\_25999, whole genome shotgun sequence  
MLCVELDVNNTLVANSQTVENCTTFLLEMEKQDYNILVQPLTISPEQIGFVFAWGFSAVLT  
FWFFGYVVGVIKSVIRQA

>gene\_1664|GeneMark.hmm|116\_aa|-|6716|7066 >NVVL01000076.1 Rickettsiales  
bacterium isolate NORP64 Contig\_source1382A\_25999, whole genome shotgun sequence  
MELWARSPTFPPLTNLINWSIIMKYFIQGRFRGLVEQKRGKDKKEYTFYVVLESEQNITL  
IKQIQYNPEKFAQIDEDSFKGQTVLCPVYIDHVHKKSDSGDVKTFENIKLIDEIKVV

>gene\_1665|GeneMark.hmm|180\_aa|+|7660|8202 >NVVL01000076.1 Rickettsiales  
bacterium isolate NORP64 Contig\_source1382A\_25999, whole genome shotgun sequence  
MNNRYTVYDKLTGKEVEAKDIEFKASKEKIRVPKEAIMLSQRDFEQLLEMRDKDDKLVFQ  
GNDLRVLFKIIFKLDNFENYVGINQKKLASVLRNLPSSVSRSLKKIKKIGVIEESDEESIH  
TYRRLNPQFGWKGKGETWAIELKKRQVKKEVDYEKEKHEQREIDDILDNAEEVDSSLYE

>gene\_1666|GeneMark.hmm|224\_aa|+|8310|8984 >NVVL01000076.1 Rickettsiales  
bacterium isolate NORP64 Contig\_source1382A\_25999, whole genome shotgun sequence  
MKINKINSESIDSLRTISCLIVVLSHVYELSTNNYNNLVNELISFTAVAVFFYLSGYVNY  
ISYKNKNNPLIFWKERIKRIYPAYFLAVLLSFTLAYILDIEKLSYLSNYIFLQSWATETI  
ITNQALWSLAYEMFLYLIFPAFFVVRNKAFFWGFLAICVVLIVFHKINALILLCLFLAGMI  
KARKKKEFKEFYFFPKIGKWTEIYIFHFPALFMLFELYSRFIA

>gene\_1667|GeneMark.hmm|345\_aa|-|8952|9989 >NVVL01000076.1 Rickettsiales  
bacterium isolate NORP64 Contig\_source1382A\_25999, whole genome shotgun sequence  
MFIGNCKLPKLLYNNIEKNNKRRSMKRFVSNFIKYYKTKVDVLSAHCERKIEDTENVID  
KKLTPLNQYFFYGKNIKKNFNKFEAYKKILGKNPRSDFNLCYLEGVLAFSNEKFQKSYNE  
NPLDFERALTESLERISKTFGFTGLGWSLHVDEGHKQEDGTIVLNPHAHLSFFNYDFENR  
KSTFKKLLKDFSKMQDICGEVFKELGFERGISKEITKKKHLEKSEFVAQKKKENLKHVK  
ELERRNKSLEQKQSKLLELEYDLTSDPKPRPKFLKRFKVQFLSFLSKKQKEIKHWDAYQ  
AKMIEQRLLKEEIQKETIKQSYSIKMSDDRKSKSRYKPTIKLK

>gene\_1668|GeneMark.hmm|143\_aa|+|10090|10521 >NVVL01000076.1 Rickettsiales  
bacterium isolate NORP64 Contig\_source1382A\_25999, whole genome shotgun sequence  
LIYKIYVINLNYKNNKGALMIDLIFILITIIIIIMMFLLLTFPKYYKIEEECEKNARK  
NILIEEVKRLRFKDYDLNQRISLFCLEYSKQFNIFLEECRKNKIFPEDITEKMTTREFAT  
MLRHSPWYLVKEHKSIIKNEEE

>gene\_1669|GeneMark.hmm|31\_aa|+|10523|10615 >NVVL01000076.1 Rickettsiales  
bacterium isolate NORP64 Contig\_source1382A\_25999, whole genome shotgun sequence  
MVYLFEGYNRDFRNEKLNDEFEKMYKENFNF

>gene\_1670|GeneMark.hmm|361\_aa|-|114|1199 >NVVL01000077.1 Rickettsiales  
bacterium isolate NORP64 Contig\_source1382A\_26108, whole genome shotgun sequence  
MPIDLKIRNIIKEVGHKIDDMREALTTNDSYRSVQNLGEGGDFITAPEISQLFGEV  
IALWAIKWKELGSPSSFALVELGGGQKLMRDFLRTAKLVPEFFKAAKICLFEVNPFI  
KKQQQHLDQYDKQTTWLSDLKNLPKLPTILIANEFFDALPIKQYLKSKDNWFEQVLVIDP  
SDGMVKKHHKLELHKTGQLLDHTSAQDGAILEESVDAFNMMRLIAKNLSKYGGASLII  
DYGVDIDVNRTRKQYNATLQAIKNHKEYESIATMGEADLTAHVDFNALKKVSTEQGLEK  
QTIFSQGEFLAKYGIDLRLDSLKQKLPKSDSEVLERQVYRLTAKSQMGELFKVLEVFNSA  
V

>gene\_1671|GeneMark.hmm|262\_aa|-|1190|1978 >NVVL01000077.1 Rickettsiales  
bacterium isolate NORP64 Contig\_source1382A\_26108, whole genome shotgun sequence  
MLDFPNIDPVIISFGTLAVTWYSISYVGGVLLGWYYALMLVKTTKTPLTKQHVDDFITWV  
IIGIIIIGGRLGYVIFYDPAFWAHPVDIFKTYEGGMSFHGGAAGFIAAAIFYARYNRVSI  
FATLDFATTAPIGLLLGRLANFINGELYGRVTDVPWSFIFPGSDGNPRHPSQLYEAALE  
GGVLLFILMIAALRFNALERRGVISGLFLVFYSMFRIIAEFFREPDHIGFLAGGFTMGQ  
VLCIPMLFAGVILIFYSKKQCQ

>gene\_1672|GeneMark.hmm|406\_aa|-|2004|3224 >NVVL01000077.1 Rickettsiales  
bacterium isolate NORP64 Contig\_source1382A\_26108, whole genome shotgun sequence  
MFDYNAAFESQIQQIKNEGRYREFVGLQRIAGSFPKAYWGEDKKEIIMWCTNDYLGMSQH  
PKVLKAATQGILENGVSGGTRNIGGNNYAAMDLEKEVADLHGSEAALVFTSGYISNDAT  
LTTAKIMPGLVFLSDESNHASMISGMKNSRAEKHIYRHLDMEHLEEILKTIDINRPKII  
AFESAYSMNGLISPIDKICELAKKYNAMTYIDEVHSVGLYGDRGAGIANMMGVEDKIDII  
QGTFKAYGVIGGYIAGNSAIVDAVRLTASGFITTSLPPAVTAAATASIRHLKDS DVER  
EKHHDSVENVKNYFKEAGIEFLKNQTHIIPIIIIGDPKLTAKASKMLVEEHNIFVQHINYP  
TVPKGTERRITPTPAHTKQMAQQLTEALIDVFAKLGISLKNKEAA

>gene\_1673|GeneMark.hmm|264\_aa|-|3325|4119 >NVVL01000077.1 Rickettsiales  
bacterium isolate NORP64 Contig\_source1382A\_26108, whole genome shotgun sequence  
MVNHDGVEHSGYMSFMVLVSIFPFFIFILALTSFLGASELGAKFIEFALENLPEQSIESI  
RARISELIKAPPQELMTLAFGSIWTSSSFVECLRTLNRVYEIKSPPNYIFRRLSIIQ  
FLAISLVISLAMLVLLIPIGLAKLPQFVLLAKGYGETLNLARYALVFLSLFSLVCSLYY  
IIPNTKLRFEVVPGAFLTIVLWTSSGYLLSKYIGHYHQLNVVYGSIGSIIITLIFFYIV  
NMIFIIGAENYLTRRGRKKSSIR

>gene\_1674|GeneMark.hmm|123\_aa|+|4446|4817 >NVVL01000077.1 Rickettsiales  
bacterium isolate NORP64 Contig\_source1382A\_26108, whole genome shotgun sequence  
MARKNEYIQEVDKFGVEIYSLRLAKGLSRQQLAKNIGVTHHQLQKYEKGTNRISVGRLV  
LIARALGKEIAFFYEGLDSNHKEPVTTKHQRMCIIEVSRNFMKINSADHQS AVNTLVKSL  
KVA

>gene\_1675|GeneMark.hmm|708\_aa|-|4926|7052 >NVVL01000077.1 Rickettsiales  
bacterium isolate NORP64 Contig\_source1382A\_26108, whole genome shotgun sequence  
LLTGKCRYMFFGVNIDLIIVVAFLTIVTLVIGLGQGGRVKTIKDIALGGRNFSTAALVATI

VATWASASGFFIDLTEVYSHGVLFVVASLCMGIQLLIMAYILVPRMGEFLGSTSVAESMG  
DLYGKKVRIITAIAGSIGSMGLIAVQFKAFGNMVSYSYFSDIPSIVAVIISGMVVTFYSAMG  
GIRAVTVTDILQLFTFCFVLPVVGIMIWNQLYFTGFSIDTALESPKFNIQRALNIGNPKL  
WEILPLMIYFTIPTMMPASFQRISMARTLEQIKKATIISA AVFATILLVMAWIPFLFYV  
NPDMESSQLFGFLIDNYTYTGLKGLLIIGIIAMSMSTADSNMNISAVMISHDICNVVAIK  
KNNELVLAKVFSLLGIGGIILALKGRDLSIVLSANSFYMTVVTVPLLSILGFRSSTN  
SVLIGMGAGFCTVVVWKIFSIAKADTIICGMLANIIFLFGSHYLLGSEGGWVGKDRKYLD  
AQELIRKKNKGSFLRWFQEFNFFDLCRKYSKDDLTYTGFYCICTITMYSTKVVELL  
SPNGQIVLAIYQIMMVTGTMMAMYPIWPLSVPKIIRVQIWWNP AIFYMLAFFSTFFV  
LISKFGQLQFVIFTVNNILILLAGWRLSIPMIIGGFYAGIEFFKYYREIDSFDIVVGGSP  
QFIFMYSLVLIGALMVIFLKPQEHLEHTEDKAPAQTKSEPEKLRPQA

>gene\_1676|GeneMark.hmm|256\_aa|-|7391|8161 >NVVL01000077.1 Rickettsiales  
bacterium isolate NORP64 Contig\_source1382A\_26108, whole genome shotgun sequence  
MDKSIVAEIKEITTEAGAMAVNLRNKGLEISLKEDSSPVTNADKAISSFIFDRLTSIAPD  
IPVICEERPPCAVDTSKQFWLIDPIDGTRSFIDNTDNFTVNIALIDNKSAAYGFIYQPTT  
GLLYFTDAEQNFCVEENGIKTIRPAHGSEGLVAVVSSHHLNEKTESFLASNSFSEIVSIP  
SSIKLCMLAEGRVDIYPKFGTTMEWDIAAGDALIRAAGGKVCTLSGEIMQYAKKDFRNNH  
FIAMGKRWNKGVGESC

>gene\_1677|GeneMark.hmm|296\_aa|-|8172|9062 >NVVL01000077.1 Rickettsiales  
bacterium isolate NORP64 Contig\_source1382A\_26108, whole genome shotgun sequence  
MGLLVNKEAIIIDGKQVSEQILADLKLKIDEDKRQSKPPAMLAILVGNDPASAIYVQN  
KIKAAARVGVIEVILKEFDDIPEDVLLKEIDALNLDNDVSGIIVQIPLPAHISKAKILTA  
INPEKDVDGFHPINVGRLYSPHKNGFVPCTARGCLALIKHCTNALAGLNVVVVGSRNIVG  
RPLAALLLKEDCTVTICHSRTKNLAAITSKADIVISAIGKPAFLTTEYFNKDAIVIDVGI  
SRVMGEGGKTRLSGDVDFQNVQKLVKYITPVPGGVGPMTVAYLLVNTYAAKIGLNS

>gene\_1678|GeneMark.hmm|423\_aa|-|9097|10368 >NVVL01000077.1 Rickettsiales  
bacterium isolate NORP64 Contig\_source1382A\_26108, whole genome shotgun sequence  
MDSIIIRGGNPLVGEIFISGAKNASLPIMAASLLTEQTLELTNIPKLSDIVTMRSLLENH  
GTEIDSAEQPDESLTLLRSKASITSFLAPYDIVRKMRSIWWLAPLLARFGQAKVSLPGG  
CAIGARQVDLHIAAMEAMGASIEIKEGYIHAEVKGRKLGCHFAFAKSSVGATVSAVLA AV  
LADGETHLSNCAREPEIVDLCYCLNQMGAIEITGIGTGELKIGKEKLSGTSYRILPDRIE  
AGTYMIAAAAATRGDVKIRGIDYELVENLALRMKEAGIEVTPRDGYIHVKHKGEIKAVNIS  
TQPYPGFSTDLQAQFMSLMTLSVGTSSVSENFENRFMHVPELCRMGADITIRDHSAVVQ  
GVDALTGAVVMASDLRASVSLVISGLCAKGETTIRRVYHLDRGYQSLEKKLANCGADILR  
VAE

>gene\_1679|GeneMark.hmm|1539\_aa|-|3|4619 >NVVL01000078.1 Rickettsiales  
bacterium isolate NORP64 Contig\_source1382A\_26184, whole genome shotgun sequence  
MRKARQAGALGAEIKDHGVTLTNASGQNMKIHAVFWLTMRIADRTITEPVIVVTHMSGDM  
ILGQNVIDVHGLTFDHALSQFAFAKDPSSNPTDWATATVRTSRICSIKGSEALKVQVHLF  
DDSTGLRMKGGVNFVADISGVPIVAKTNHNGVALLFVSNTDDGEVTIPRGTTIGTAEALD  
RYYMDASPVSVDTADAVIHAVAVQPKSRRKPARPTKTADGGLQASASSKSQKPSQGDST  
PKLSAAKRILINEVVIRSKIPQQYRQRYTALLSKYSIISESPHDLGHCAAVVHDIKLRS

DEPVYTKQYTLPEQEMRFIKDNVKDWLRTGVIERSTSKFNSAIFCVRKKEGQGLRVVLDY  
RKLNANSLPDRYSIKSADALIRDIGEAGGKVFSTIDLRSQFWQMGLAEQARHMTAFTLLG  
EGQFQWKRGMGLSGCPSFSRLIEIVTRGLENVVYIDDLTFSKTHEEHLVHLEGLLM  
RLRKHNLKINIAKCSFGTFETAYLGHTLTPEGVRPGIDKAKAIRDCVPPETPKQLKSFLG  
VCNYFRNYLGHFARKAAPLYKLTRGDSVWKKGPLPPKAKRAFQLLQKEIAERPVLAFPN  
KGRFHLYIDGALGGESKEGGLGAVLMQEQPDGQMKPIGFASRQLQEHEKNYSAFLVELAA  
ATFAIDFFQIYLPNTFTLYSDHKPMTNLSKVHMKTLNRLQLMMTEFHFDIKWVRGEDNI  
VADFLSRNAIAAINAVDTAPSTIAKAQAEDGPIAAVRRRAVVTGDWREVGPPQWKLKESLH  
LKDDILVIELRLRQGFSSQSKWHVVLPRALHKEVMEMAHASVIGGHSGLLKTGERIRADF  
WWPNMLEDVATFLKECKVCQEFSDKNRPLQPPQNFPLAPGPNVRVHVDLHGPFTDEKGD  
KNMIVVLTDAFTKQVLAISHKSAETASAIETWYKFGVMQTLVSDGGREFCNSLQD  
TLCDLLKIERKTTSPYWRANGQVETFNKTMHYLRTVLKEADKSPVDWRMYLGPLAFSY  
NTAVNRAIKMSPFRALFGYPDRAPLWDDMDILLEKNVKSVMKGDADYLHDFAEVQKTAR  
RLAYTNQHDRDLRAKTVAQAEEGKTADVYHEGQAVWVKVMQHTGKNPKLQAKWETAEI  
IKRVSNTTFSVQRHNRKRGRFVTLNTRYIKPRVGADVHTPDIPAKPETTEDIDSVDSE  
EVPASNVPTEQSSLVAAIVQAETHKYLSRPELIEREINKEVSDIFAHWWHWQKLAGMK  
QPPFQLSFSRRGALTAPPGFPAAPGFVQPLPATPPVSRAPSEADQEEGSHTPVNSDWSSA  
PSSNNSSTTDLVLDLVERANRIKHNAVRAERGEPVSFSRSSSDTDISSDNAATTPKGYSSP  
DSDEDFDLFFPTQDREPVLRSESRRAANQADAPDTPEFQLAASSPPEGAAGHSASGP  
TTRTPSPQPSTSAAVPRTPPPAHTFLSYPLRDKLEQERLSLGRVTVNAFTHNKNKAIIP  
QCMQFFGPAPLQVRKLGRQAEAAWHECQLRQSFDPVFPP

>gene\_1680|GeneMark.hmm|363\_aa|-|4895|5986 >NVVL01000078.1 Rickettsiales  
bacterium isolate NORP64 Contig\_source1382A\_26184, whole genome shotgun sequence  
MAETIFKQESLFGTDAKKSDLSAEFLDRVTAHLNTIEDITQIQRIDAITARLSQARL  
WWKKSANKSRTAADYRLLQTDWQAWVQCFTKQYCKGTSISDATLNWTGFKALSGESSTTF  
LIRVMDAAYDFANFNKQEEEEENYPAAHFQLQHTDEEDEEDDANVTHVRAAITGLNHARRT  
LLTRAIHDHAQRYRDTFMTRYTVMMILKVTINGMNEPRLRPILLKALLETHLIGRVIDDL  
LEAENTLPRKGSASLHAIDVSDTEDQEEENLDAVKAKTNKKKKKGAPNPKPKTKPKADA  
AKKDKVCTFCDKTGHLEADCFTRRHAMANAKAATKTSKDAKPASFEHADAIATGQQHFHS  
GNY

>gene\_1681|GeneMark.hmm|47\_aa|+|6326|6469 >NVVL01000078.1 Rickettsiales  
bacterium isolate NORP64 Contig\_source1382A\_26184, whole genome shotgun sequence  
MSEEMNEKLSEQISENFAVFSFLIKNFVPRFGWKVPGERNRRKLVEL

>gene\_1682|GeneMark.hmm|389\_aa|-|7460|8629 >NVVL01000078.1 Rickettsiales  
bacterium isolate NORP64 Contig\_source1382A\_26184, whole genome shotgun sequence  
MQREGDEDIPEYSFKAVFREGDRIDLQAQITRSTITTNRMTQGFHQMSHALCEVQRATR  
ANKLIAILGTNNEYALFDLHGKGSKVISAGTSAYVAKCVPVEATRADYAECTEEVPVKIG  
NKTFFADAVNWIIRELPTVIPCSEVMMPMRWFINDRWLCSTPTTQLCAAPSRLNVSSFELT  
NNNDYAIQLGRGLFTHAQLQQRHRRFMANLESRRAAIAHVTLAAIFHADDSGALGIPISKE  
ALKKCLKHDIASSYFPMIAWLGWSYSYIYGAIAIVVALSVVAGALSRAFILYRERGCWWI  
FGAVSAAVFSIIRFQFQIVRTRDLVVNNLDTTVNTTAYQEIRTENAAFRKDIERLALQV  
DTLHTQETSHKLYPSPVLPQDFHKPSD

>gene\_1683|GeneMark.hmm|61\_aa|+|8624|8809 >NVVL01000078.1 Rickettsiales  
bacterium isolate NORP64 Contig\_source1382A\_26184, whole genome shotgun sequence  
LHASDESVNLGTEALEAADRDGIRENETRSLFGVVVGHEEDGTVHGVAPGPMEQSGPEVD  
L

>gene\_1684|GeneMark.hmm|159\_aa|+|8834|9313 >NVVL01000078.1 Rickettsiales  
bacterium isolate NORP64 Contig\_source1382A\_26184, whole genome shotgun sequence  
LRCPDECANRIVLSDPVVVADDQVVEGEGEQRALGLGEVSGPVDGVEGEVKCCLLVGVVE  
LAAGRDEGCCCAGAAEEAAVRVVLVALRLAGTRREDLPFEGEEVLPVNPAAVSWIDGNVP  
LPHHSFATVVERREAAAANDLGNRYPALESGDWKCRVCV

>gene\_1685|GeneMark.hmm|127\_aa|-|9814|10197 >NVVL01000078.1 Rickettsiales  
bacterium isolate NORP64 Contig\_source1382A\_26184, whole genome shotgun sequence  
PATTS AHLPLVPAKGQTRAGTALARDQGHERVHTQQEQSHHSAMHAVLRTSSVAGKAAGK  
TGRSSLARVPTATVLPGRLSAGAQQTRSDEADGVQAHTL NESATSAAINSLINGVISSK  
LLGYPFT

>gene\_1686|GeneMark.hmm|270\_aa|-|52|864 >NVVL01000079.1 Rickettsiales  
bacterium isolate NORP64 Contig\_source1382A\_26257, whole genome shotgun sequence  
MVKLSGFIIAKNEATRITKAINSIKNIVEEVIVIDSGSTDDTVKIAEKL GARVVYNEWKG  
YVLQKSFGESLCKNDWILNIDADEEFTQKLQDEIAGIFAERQDDCHAYEVNFVVMHRND  
KKLRFLAPANRFIRVYNRNYCSFSNVKETTTHDAVMFNKDTPKDSYKLGAAAYHRSGTSI  
TQLVAKANFYSSEQAKDWKLGKRP SNFRIALELPLCFLKAFFIRRHCVFGFDGFVDSMV  
FAFARFIRIAKTREIYRNEESEANTGFRKT

>gene\_1687|GeneMark.hmm|284\_aa|+|1192|2046 >NVVL01000079.1 Rickettsiales  
bacterium isolate NORP64 Contig\_source1382A\_26257, whole genome shotgun sequence  
MPVLMQTTIQNPISCYGIGVHSGKNTQITLKPAKRDTGIVFVRTDVSSVDNEIYASYENV  
FDTSLSTSIKNNANTQVHTIEHLMAAIWGCISNLIVEIDGAEVPIMDGSSKPFVFMIEC  
SGIQKSNVPQKRLKLLKEIDVSDNGCEIVGVPDCLSIDLTIDFASPAIGKQQHIFTEQD  
GFKDEIANSRTFGFLHELDYLSKGLAKGASLDNAIGIDKDVILNHDGLRHQNEFARHKT  
LDQLGDLFTAGNLIADLKSFKTSHYLNNQFLHKVFS DPYSYKWI

>gene\_1688|GeneMark.hmm|135\_aa|+|2305|2712 >NVVL01000079.1 Rickettsiales  
bacterium isolate NORP64 Contig\_source1382A\_26257, whole genome shotgun sequence  
MPDYINIILLIILGFAALFMIRKMLTHQKPKHIVPKDPASQDLYEQQKHQGD EEEIISME  
EKIELSWEFLLGIVRKIITIFSPEDKEQLHQAGGVLNKNGMQYQHVDVNQEVIMMDNLSKV  
SGVQKQKNDSDGRSR

>gene\_1689|GeneMark.hmm|202\_aa|+|2808|3416 >NVVL01000079.1 Rickettsiales  
bacterium isolate NORP64 Contig\_source1382A\_26257, whole genome shotgun sequence  
MTKIKNSKAMIVILSAPSGGGKSSIAQKLLAQDENLSLSISVTTRAPRASESDGVDYFFK  
TREEFQNM MNADMMLESAEYGNLYGTPVQHVESTLAQGTDLFDIDSQGAYQIAEKMKD  
RIVSIFIPPSIEALARLESRAQDDKATIDKRMKLAKDEMEHAKNYDYMVVNDDFNQAV  
TEIQQIIHTQRKQRDYKQRVSK

>gene\_1690|GeneMark.hmm|412\_aa|+|3413|4651 >NVVL01000079.1 Rickettsiales bacterium isolate NORP64 Contig\_source1382A\_26257, whole genome shotgun sequence  
MKKPKKRIAGAFGLTIVEYYDYSLYGFSAGILAEKFFPTMSKIESLTYVFAIYAISYLAK  
PFGSIFFSHIGDFYGRKISLRITMIGIAFPPTLTIGLLPDYHSIGNLGAYILVICRFLQGF  
FVAGEYDGAIVIYVVEHIGKHHYAASATARSTGVAGLLLGAATNFFNSSIFPEWCWRIP  
FLLSVPLTIVTIYRKFLEETPEFMRSKAKNTEFSSTLSFIKKRWRTLLMVILLSGGFGV  
TYQVSIIFMKQYLPMVVPYGTIITTFVIMVLGFGGLAMPVAGILADRFGCERLVKYSLL  
STLVASGLLIISINHLINLTLISCLMLAVSVAPFNALAHGVIIKAFKPNERYRGVSLGH  
TTGSMLMSGTANYVCLLFMQKFGFNLFPIFYIGFFAIVTFVTVMFLFTRTYKA

>gene\_1691|GeneMark.hmm|98\_aa|-|4699|4995 >NVVL01000079.1 Rickettsiales bacterium isolate NORP64 Contig\_source1382A\_26257, whole genome shotgun sequence  
MSFKLLFTKEAASNLEALENDPSKKKRLKAVRKSGLYLETNPRHPSLNTHEYNSLSRDLR  
VKIFEAYAENKTPQAYRIFWHYGLGKSEITIIAITPHP

>gene\_1692|GeneMark.hmm|89\_aa|-|4996|5265 >NVVL01000079.1 Rickettsiales bacterium isolate NORP64 Contig\_source1382A\_26257, whole genome shotgun sequence  
MRTQKILRPDAKGRICLGLLAKGISGYEAVINKANKEITLKPYTEIPLSENWLFKNEEAR  
DSIKRGLKQSADNKTIYKGSFAKYLDEDN

>gene\_1693|GeneMark.hmm|506\_aa|+|5488|7008 >NVVL01000079.1 Rickettsiales bacterium isolate NORP64 Contig\_source1382A\_26257, whole genome shotgun sequence  
MKFFRFFIIIFLILNSFTIFASDNDIECADSTLKQKLLSGWYLWEPYQFYKITPGGA AVL  
TGMDVQLVKSLAKRVGVRIEYEEISWNQHQQNIREGTLDIASGATYTKERA EYAYFSDPY  
RFEENSLFVLRHSEKNLSFETILEFLAQIRLQNFRLGITKGFYSDPQINL FISDKLNRD  
IYQYND DVEAIESLLKGEIDGVISDRVVGAA TILNHKATSLIREVELNIKTPISLMFSK  
KTVPVRLVNEFNKEIKRFSEGDERNNIVKTYLPVMLMQTIESNWFYIIGVIGTIAFAIS  
GVAIAAKDN TTFGLTFLFAMLPVGGGIMRDIMINRDEVGIFLTPSYMYIIIVLVGFA  
TIRLLEYYNQKANEDDVIIRFDNLLILGDALGQASFIVTGVSIAIMSRIEPIILWGPFF  
AFLTANGGGILRDLLRKKRGIICLNGEINAEISVFWGVVFSVYLDVTSHDPDSSGIRTAV  
IIATSAFITRLVTYYLKVPNLKFRK

>gene\_1694|GeneMark.hmm|538\_aa|+|7063|8679 >NVVL01000079.1 Rickettsiales bacterium isolate NORP64 Contig\_source1382A\_26257, whole genome shotgun sequence  
VAKKRHKNCNRFDRGNMLVKKRHKNCFNRFCDGNMLVKKRRHKSYYRLCDIKINFNMQD  
PFFMGREYELKSLYDLTQKKSASLVVLRGRRRIGKSR LAKEFATKYKPVKCRFISFAGLV  
PTNDDAATQKEEFARQLAKNLNLPPIKADDWGDIFTHLARETQSGRVVILFDEISWMGSK  
DPSFLGKLKNAWDLEFKNNSNLILICGSVSSWIEENILKSTGFMGRSLVLDLQELKLD  
ESNQFLSKIGFCDSVYERFKVLSVTGGVPRYLEEINPSKLADENIKDLCKSSGILFREF  
NDIFLDIFARRSKTYEKITRTLVTGRKELKDIKAIGTQKSGHLSEYLSDLVKSGFIKRD  
YVWRIKDNKESKLSYRLSDNYLRFYLYKIEPNKSKIENGHFDNKALSTLPAFDSIMGLQ  
FENLVLANRQLVLQKLNISPEDVVDHPYFQRPQQRVEGCQIDYLIQLKQNILYACEVKF  
SRKEAGMSVIQDMKQKLDKFIKPGFAIIPVLININGVSDSVRDSYFRLIDFSDMLN

>gene\_1695|GeneMark.hmm|354\_aa|+|8968|10029 >NVVL01000079.1 Rickettsiales bacterium isolate NORP64 Contig\_source1382A\_26257, whole genome shotgun sequence  
MGVLLVFGILLTVKCRYMLFGVEIGLDMGIVIGFLVLTAVGMGHGKSVKTIKDIALGGR



NFSTAALTATIVATWASGSGFFILMSKTYSDGLVYMFASFGIGISFFIVAFLLVPRMGEF  
LGSVSIAMGNLYGKKVRVITAIAGTIGAAGSIAGQFKVFGNMFYFLHIPDYIAVITA  
GFIATLYSAFGGIRAVTFTDILQSVAFGVIIIPMVGFIVWGEFFNEGLSFSQAASNSKFNL  
DILFDSGNPELLGMVVMFCYFCIPTVSAPAFQRIAIGRNVEQVKKAFIAGAFILIKII  
IAWIPFLVYSMNPSLESGQLVSYIVDTYSYPGLRGIIVAIIALSMSTADSRIN

>gene\_1696|GeneMark.hmm|30\_aa|+|2|94 >NVVL01000080.1 Rickettsiales  
bacterium isolate NORP64 Contig\_source1382A\_26406, whole genome shotgun sequence  
QSPKTPKPQNPKTPYLNQGKQLIIILITER

>gene\_1697|GeneMark.hmm|43\_aa|+|974|1105 >NVVL01000080.1 Rickettsiales  
bacterium isolate NORP64 Contig\_source1382A\_26406, whole genome shotgun sequence  
VQLQPMEMLSARLVMLLLQVIATLAQSSEKSMLSDIREQLKQS

>gene\_1698|GeneMark.hmm|91\_aa|+|1102|1377 >NVVL01000080.1 Rickettsiales  
bacterium isolate NORP64 Contig\_source1382A\_26406, whole genome shotgun sequence  
LTTDNKCKKMCQPKQIELMVGEKDNHILICQDCDAGCEHGCGRGNTKSCPKDSTKTPADAD  
FLSAHCATGKKVEKFPFRFKNNRGPMPADQ

>gene\_1699|GeneMark.hmm|72\_aa|+|1409|1627 >NVVL01000080.1 Rickettsiales  
bacterium isolate NORP64 Contig\_source1382A\_26406, whole genome shotgun sequence  
MQIWKTKLNSKSDVPLAQMAMDSLLQRLNLSVKCAKLELLIVQPHGMQIVTVVKWFQ  
ELLAKKLNSS

>gene\_1700|GeneMark.hmm|48\_aa|+|1624|1770 >NVVL01000080.1 Rickettsiales  
bacterium isolate NORP64 Contig\_source1382A\_26406, whole genome shotgun sequence  
MTSEGRCKHIKTINCPPAKFFDKAAKACADCTGCAKCHGAADNCSECA

>gene\_1701|GeneMark.hmm|27\_aa|+|1837|1920 >NVVL01000080.1 Rickettsiales  
bacterium isolate NORP64 Contig\_source1382A\_26406, whole genome shotgun sequence  
MTDKACTVIEGGRKERDILDKAEEMEE

>gene\_1702|GeneMark.hmm|161\_aa|+|2159|2644 >NVVL01000080.1 Rickettsiales  
bacterium isolate NORP64 Contig\_source1382A\_26406, whole genome shotgun sequence  
MELVLQLLIVELASLLTPLKVNHLAKPIIALNVNTEETVAVKSALLISSFTKENVSTLA  
IPLKDYLRSKMERKHVNTVTTIMVAKHVKLQIQTQQLVKSVTQLTLFSALNVSKIAHLR  
LTERLQTMKPRVHLVKMMLKLSNADQEKTQVLMYYKQWNH

>gene\_1703|GeneMark.hmm|89\_aa|+|2833|3102 >NVVL01000080.1 Rickettsiales  
bacterium isolate NORP64 Contig\_source1382A\_26406, whole genome shotgun sequence  
VHPVTGECARDGPTSECKTDLACAFCKKSEAAGSGALCTSCPTGKVLKSGLCVDPADCA  
GQWGGKKRMGDVEISACVPCFEGCATCNK

>gene\_1704|GeneMark.hmm|33\_aa|+|3239|3340 >NVVL01000080.1 Rickettsiales  
bacterium isolate NORP64 Contig\_source1382A\_26406, whole genome shotgun sequence  
MEIQQIRNAKLAVQTNSNALKQMEQQPAIEDLF

>gene\_1705|GeneMark.hmm|119\_aa|+|3365|3724 >NVVL01000080.1 Rickettsiales  
bacterium isolate NORP64 Contig\_source1382A\_26406, whole genome shotgun sequence  
VQHAQPTNSTIESLLQMLKVNLLKFFVLTVLVIVQNVNTKHHNVLSAQLISQWLLFIDVG  
LHPLHQKVMPLTRIHLNLSQIHKPLFNAQLHTKTALLVERLIHSKLLL FHV LNVMTDSN

>gene\_1706|GeneMark.hmm|109\_aa|+|3745|4074 >NVVL01000080.1 Rickettsiales  
bacterium isolate NORP64 Contig\_source1382A\_26406, whole genome shotgun sequence  
MCYEKCPIGEFFSNKANMCRQCKGDDMACKEVPVGDPTATEFDYKTIACKKGAIMRKGR  
HGERSCVSKCGKNEFEAFEELEIKNEGGNMSKKPDQGGDKLDSEAKGDF

>gene\_1707|GeneMark.hmm|98\_aa|+|4124|4420 >NVVL01000080.1 Rickettsiales  
bacterium isolate NORP64 Contig\_source1382A\_26406, whole genome shotgun sequence  
VKKICKTQIHKKMEPERLSWIKMMKEKEMLNLSKLT LNTKRN VMEQKKILMHHILPEMLK  
VLTKPSLKERTKSQFSKRMVMKNQNSKKNFKTTQLIKR

>gene\_1708|GeneMark.hmm|214\_aa|+|4417|5061 >NVVL01000080.1 Rickettsiales  
bacterium isolate NORP64 Contig\_source1382A\_26406, whole genome shotgun sequence  
MKECNDLDKTRKKNQKFKPMSIKVCRPCPDWCNDCNKFQCKACKNSQDVLDKQGNVCVCK  
DLTSNIKVLDDKERGTVIIIITYPGRIDVKGDDKREEKMDDLEERNGGQHKPDKEEMDGVM  
HSWGIDRDQFEIFRGKAERIMNNEKCQLKWNMARS MG EFDKRLDEEFYEEKEEKNRKDKM  
CKAYNHA EFLTAADG E AAGFSGEEQGD RQKIEGC

>gene\_1709|GeneMark.hmm|71\_aa|+|5048|5263 >NVVL01000080.1 Rickettsiales  
bacterium isolate NORP64 Contig\_source1382A\_26406, whole genome shotgun sequence  
LKDVKPRHSKMSFSAQLPINAELLELNHCLRNKNHLEVRMRKISNNSVIKNLRTLKMHRP  
YFQNNKEMMQD

>gene\_1710|GeneMark.hmm|45\_aa|+|5314|5451 >NVVL01000080.1 Rickettsiales  
bacterium isolate NORP64 Contig\_source1382A\_26406, whole genome shotgun sequence  
MADIKAFMSANKGSQKDILRSENEKDDSCGKEPSMSQNDKENM

>gene\_1711|GeneMark.hmm|88\_aa|+|5432|5698 >NVVL01000080.1 Rickettsiales  
bacterium isolate NORP64 Contig\_source1382A\_26406, whole genome shotgun sequence  
MIKKICKSNSMERLSNHLLQEKEMITLLSKEPKEMLDYLEKIDKKKLN VVIKCFKDLERL  
LDLKH WEDVKYHQLTKNREKKKKEAKEK

>gene\_1712|GeneMark.hmm|34\_aa|+|5695|5799 >NVVL01000080.1 Rickettsiales  
bacterium isolate NORP64 Contig\_source1382A\_26406, whole genome shotgun sequence  
VSGDANEISDRDGGDRTR EEEQ QMEQIVGMIDDA

>gene\_1713|GeneMark.hmm|128\_aa|+|5789|6175 >NVVL01000080.1 Rickettsiales  
bacterium isolate NORP64 Contig\_source1382A\_26406, whole genome shotgun sequence  
MMHKKKCLESEVMKLT VKTDKKDKNHFNKVRKMLKDLLHISKLVYQQKRLKII E EVMER  
ENLQKMLLDQEEKRMMKKPERTSNQIVQTKNKITDQVVERSCPMRIWNMFKTAELDILRT  
ILEIGQQS

>gene\_1714|GeneMark.hmm|313\_aa|+|6304|7245 >NVVL0100080.1 Rickettsiales  
bacterium isolate NORP64 Contig\_source1382A\_26406, whole genome shotgun sequence  
LKSFRDTPMTGIYARGEQGELEKCWEHKDFPHKDEVEEDFIKPCQCQIKVLNAADNSID  
EVNTPKCCQAQFAATQTSISKALSADLAGKTIVFNCEQENKRGGLCFQQVFKVNENDAVTYR  
QLDRVPDRKGRCEIKGDTFIQVPRLVKNSCTVQEEGLAISLVLKKKNAQGTFFDSATAD  
LPADFDIANVKMGSRAKFFNALPVGIYKATWAWDGVSGEEFVDIFCIRNKPIGLNCMDLR  
IEQGNNGGAMKCAENLSVDDISVSVAGGCADPVKTIVEGKLVLTFFATIDAAKDCELLIT  
DANTSEELAGNRV

>gene\_1715|GeneMark.hmm|113\_aa|+|7297|7638 >NVVL0100080.1 Rickettsiales  
bacterium isolate NORP64 Contig\_source1382A\_26406, whole genome shotgun sequence  
VKQEQLKLNIDEPNQFFLQCGRGTAVAGTTISLFDSEFTLITTFDVSKNGGFVIKGADA  
NKFTEVDGATTGYLSLENGSIQVERDELLELGGVGYDFSVENVNGDNIAFEANTY

>gene\_1716|GeneMark.hmm|52\_aa|+|7681|7839 >NVVL0100080.1 Rickettsiales  
bacterium isolate NORP64 Contig\_source1382A\_26406, whole genome shotgun sequence  
LEKGGPKKGGKINRGCKIETTSDGFTIINPLPKGKPGSTGIAICVMEGDYKVAC

>gene\_1717|GeneMark.hmm|60\_aa|-|7836|8018 >NVVL0100080.1 Rickettsiales  
bacterium isolate NORP64 Contig\_source1382A\_26406, whole genome shotgun sequence  
LHDFLVSLSKLAKSEHAALVNSTHRLASSLQIDIFSRIAAPSSPKAAALFELSFVIDNI

>gene\_1718|GeneMark.hmm|95\_aa|+|8177|8464 >NVVL0100080.1 Rickettsiales  
bacterium isolate NORP64 Contig\_source1382A\_26406, whole genome shotgun sequence  
MILFQIVKHFSPTLKKIKIHLLKKKREIIAKSFKKLEQLLPLLRQLMHLKQLWTRTGQHR  
FSKEQNSPIRTKLLRLKLLKAQSELNSQRADVKI

>gene\_1719|GeneMark.hmm|59\_aa|+|8669|8848 >NVVL0100080.1 Rickettsiales  
bacterium isolate NORP64 Contig\_source1382A\_26406, whole genome shotgun sequence  
MMEQPQVSTMNHLLKMNLLAVLKKINSAFQLDNKLMQMEILFQEMLSKSTQKIQITLIK

>gene\_1720|GeneMark.hmm|265\_aa|+|8845|9642 >NVVL0100080.1 Rickettsiales  
bacterium isolate NORP64 Contig\_source1382A\_26406, whole genome shotgun sequence  
MTSDTVADNIIATSCSASQYFFLETASSISADRFYMGFILIYTIIFLDLYLIFGVILGKK  
FDNEGKSAVQIPSDDEKSVNANNTDMGLKGDIEQNVRAKKNPTCCFALKQKHRCISVFS  
AYHPLLSRPARLLNVSGYFLALILTGGMLLAMEDIVGGIIGFAIAFLFYRLWIFLGEKM  
FKANKCLGYIVGLILVVGHHGAGVAFTLTQIDEAFTFWGIFWAGIVIELAFWEIISFCV  
QNGIAKKANKEKRSWVTIPLWKAYN

>gene\_1721|GeneMark.hmm|277\_aa|-|40|873 >NVVL0100081.1 Rickettsiales  
bacterium isolate NORP64 Contig\_source1382A\_26629, whole genome shotgun sequence  
MSLSACKGISIDGEQWFNSWANDKCYDIMYNLVYKDMGESSYNVIGYEMSQDIMVEVFEK  
YTNTYNITSPGLEGYNSFQNTLRDVCSRLPGVCEKALESYCHSCPKNRRDMSLSKPTLE  
FCGCYIRNGKTTKQCDPLCNRVNTIQLPNGSGGTLKCNENICVINDVTIQAASDLSNKS  
VTFKQLCNCVGGCKCIISGINITSLLNSTGITKNIDQHCGAKSTCLKILPNGTDEIVNC  
LTQLPNDKHKEIYYISLTFICVLLFAAIIFYFYKRNK

>gene\_1722|GeneMark.hmm|66\_aa|+|914|1114 >NVVL0100081.1 Rickettsiales  
bacterium isolate NORP64 Contig\_source1382A\_26629, whole genome shotgun sequence  
MESKSEFRKNAVGFMFKFFGVDFKTEFRLHSVMNAEDNTRFLENLDKSHNHYSKRYK  
GGSPKK

>gene\_1723|GeneMark.hmm|401\_aa|+|1152|2357 >NVVL0100081.1 Rickettsiales  
bacterium isolate NORP64 Contig\_source1382A\_26629, whole genome shotgun sequence  
MEFGPNIIPIYSQTCKTKKNISFVISNGSVRASIDSGYLKIQLLAYLIYSDVSNPNVIS  
DDCLSAYTQICIKYDQYMGNIHFCEIVNNEIYRMIYIECKCDLFLRSSTAGIILHFMTK  
ALLLREDSEECTKSKMSHLENIPKNSIPLAIRCCNSNVENNVEQIAKLCVFDIGGYLE  
TTDGYKYENYVLDKCLYLSSEHEEYWETTAKEIYKLIYGVPGISMSTRASLSFIYGIGG  
FDLFTLKSMDKLNLSYSLGIKFDTGIPTEKVMVDAVKLELLGIDKYTEEKSLN  
ISKYDPLSMFSLHGVKSVCCNNKYDIHSYNSDLVYFCDGGIVYVFIREDFKLIETNIN  
PFSGKEFPYRIIEMKVNSSHRMGLPECSSIRKLLDMVN

>gene\_1724|GeneMark.hmm|215\_aa|-|2381|3028 >NVVL0100081.1 Rickettsiales  
bacterium isolate NORP64 Contig\_source1382A\_26629, whole genome shotgun sequence  
MYNANEETVKATKNNVMFLQDVEQHEIIEGIIFFRTSRCKINRLVLSKEVLDVKDCSC  
GLLEIILNEKVLSLDCSNNNSLGLTIVKHRMHKFCNNSNNIKNLVFKCTPAILSCNNNII  
GNLTFNKTPSIISCYGNELTRNKDIEISYTKPLNYTSIAYNMRTGRYPSKRKYMCISCN  
SFVSSDLIYTKTRKNVTGYTTKTRICIKCFRRMIF

>gene\_1725|GeneMark.hmm|89\_aa|+|3240|3509 >NVVL0100081.1 Rickettsiales  
bacterium isolate NORP64 Contig\_source1382A\_26629, whole genome shotgun sequence  
MKPIIIYKMSDEYVFNVLSSSESENKIKINVTGNIDNIFITLFLGKDSYIINTKDVNIMD  
LNPHPKCKAEVMVPSVSSVATLPRNKIPH

>gene\_1726|GeneMark.hmm|1098\_aa|+|3547|6843 >NVVL0100081.1 Rickettsiales  
bacterium isolate NORP64 Contig\_source1382A\_26629, whole genome shotgun sequence  
MSSKETKKNAPESKVRGRINVNRRKRINVNRRRSNKTSRQGGKISGGRSTKVNVLTK  
VREERKKNREYKKNKGYRGRTPKPEAIESELISDVTNDGILVTREAMYRATSKAKASSKLP  
MYVVRGVTIRVADQETLIRESVATISNSSARGKNSINDPRTGVTMSDVLCPCTCNQGITCQ  
GHPGLIKLSRPLLHPMYIREIIRLRIICNVCGEPLMGFEEMKNEGITSLLSDVRLKVLE  
VKCIKRTCQSHAKFGIPEPCRVNPQYDVKKSDTARAIKMNAGRSTLSAGKVSEILGRLTN  
KNAILLGFAYGMHPKNYVLKVLPMVPRIRPSSVHSGTTMEDAQTQTYKKIINANNAILN  
NLNSADADNKYAELVGYVNDLWKNNSQSNNPHTQAANIPKKGILRRNMQGRVD  
NSARTVIVGVSGIPFVWVMLPRVIAETLYAVETVGPNGITWLTFLLRNNKITYIIPYGGP  
RKGISIKIDINS GAPNIGYTLKFGDRIRRNILDGDHIIVNRNPTLHKGGLLAYEVKIWDN  
LTLGMTLPATTLHNADFDGDEVNIHMPTTAAVAELEIIVTIKAQIGVGVIFDALTSVNL  
LTFGNFANDRSNDIDKSKEINVRIGKCNFDQLVNIYVIGSLGDNITPSFNESFSFRDYR  
VRVGELDKPSNGFSFKTYIEKLIIDFEGIGKYTGKSLFLLLPNDFNYERKGDVIRN  
GVLLSGVIGKDDIGPMGSLVVKLRNSYGLKVRNMFASATNVFESWISMRGFSVGYDDCH  
PFNEKERLILENTVSEEVIAEAHVMSLGPVKKDPMEEEREENEVISTLNIVKTIGQKIT  
KEILTRIPKSEENEDDFVVIISNKFMEHDTIGYGMVIEGDVLTVEYDNTIIASNDWFYV  
DEILNRSLYVADKTIIEIREHDEYICGIMKENSLSVIMSDSKAKGNPVNVAQITSLGQQ  
YFEGKRPGSTVYFGKSSNIRARGFCTRSYTGSTPYGFFAVAKAGREGLVETATGTQDT

GTSQRS AVKALEDITIRNDGTVRASNGKIIQFHYGDNSVDTERIIFKFKVGNKNVRTFIDI  
SSEVNKLNTGYGIMKPIK

>gene\_1727|GeneMark.hmm|304\_aa|+|6887|7801 >NVVL0100081.1 Rickettsiales  
bacterium isolate NORP64 Contig\_source1382A\_26629, whole genome shotgun sequence  
MFKLPK SFGNDKVIMFPDENDVLNGILIEEGTQVCKCSNLNIKYIFCPKSLIYLDCSMN  
KLKIFICSDNLSYLICNDNDIRSITFNNKLKHLNCSNNNIEQLCPNDELINLFCPGSHIS  
HVEFTKSLKVTCSHNNLNKNIIVNKGLLHLCRNNKINFILLPKSIKYLNVTSNPLANIS  
IKGNNA YDKAITKCIKYPNVQHKIGGLYANRYKKNITPVISNSRKIPIDFYVSRPNPTL  
YSLCYRLTKPKNKSFRVLELSNCQTCWSKYPTNLIGDVKVVTGNGVKTAKVCIDCIMEQK  
LIIM

>gene\_1728|GeneMark.hmm|175\_aa|-|7856|8383 >NVVL0100081.1 Rickettsiales  
bacterium isolate NORP64 Contig\_source1382A\_26629, whole genome shotgun sequence  
VDIINTIQSNSISFIYLVYIMKMYIVFLVILVYLIWSEYGSQDCIDQKCHNKVEEVNDL  
KFETILGVIRNANDNNHCIVVWRRAMISAITTGII LNKIIYNSDYSLFIVITVVFGLSYI  
FSMKTQKETRSKDIALDNELKKNLVLAQIPFGILASTESPHERIKHVGYSLY

>gene\_1729|GeneMark.hmm|294\_aa|+|8340|9224 >NVVL0100081.1 Rickettsiales  
bacterium isolate NORP64 Contig\_source1382A\_26629, whole genome shotgun sequence  
MKLILLLCIVFIISTSVLFLTRFGKGEEITTPKNKPLDELNILTGSSKSGIEIVGGENS  
GSYYVDSLSCNKSDGIWLHHLGKHCKCDFSLFGKCNRVAYDDTYKCLGNIDKTKINL  
DIISEQNVSNLSFVHNSCTSLCNDEDNCVGVHYEDKVCTLFSKISIEGTITYSHSVDGNL  
YMKGNKVIIDRVFITKGLPLRYYLKDRYSTKDGLDITWAIYQMTQYKIHFTPTFIIN  
DPNWIGVYSNPNINLDNILQIISNGTTADYFVSYTL DGLPIWKITYLVYVEITP

>gene\_1730|GeneMark.hmm|1382\_aa|-|3|4148 >NVVL0100082.1 Rickettsiales  
bacterium isolate NORP64 Contig\_source1382A\_26648, whole genome shotgun sequence  
MKRHVDPINPNIGINAVA AVDPILGIVSAKVIARQEVGYEDVRKLLKVATKTSLPVKKK  
AVDLLMAILDKRYPKPARSADLMAKNILNYFVSESNLENISLNDAAILTIASYLDNGRCR  
NSATKALIAIKVNNPLPKQASDLLAQQKGG LAIGGPASSSAAPSPSGSLAQLNEQHMGTV  
QSSSNQREAEQGEVQREAEQRARILSRMIQGLAVRS GEGHYQLSKKTLGYSKLNPGDEG  
LVNIAKGLPYEDA EKTQEILTYLKKLYLRNKHAPDFVIAKLIELEALPQIQAESIEEFIP  
AALIATNQDGAKPRHVLIDEIGAANKNNHALSSWLSGASNELSRIDETITQDSQAFPOGK  
AIDNWQAEDILAWSEAVSKEHINEDLLYELIAVASQGVRLHKGYPARDIQTLSVLALLNK  
QPDQGR LIQVKTGEGKTIICAMLACITAFRNKQPV DVITSSSVLAERDSAEQVAYFSLFG  
LSCSNLTRGDSNAPKECYTADILYGSASDFQGDYLRDEFKRLGTRSNRVFGSVIVDEVDS  
MLVDDGAKITKLSSPRPGTEYLAPIFMLTWKAIANLEITDEVLSNKGLRGELTEQIQARI  
EAIIDGEYFSYPSYLLGYISSQIKNWANSALASVMREDKHVYVIAQDIDSGADIIPVDY  
INSGVVQNKTSWGNVGHQFLQVKHSLMMSAESVTTSYISNMSFFMKYGANIMGMTGLGS  
TEAKSLLGEVYHIDTAVIPKFKPDLFHEEEAIITSDEATHKAAILSAATEVANS GRAVLI  
ISESIAFAKELTADLQAICPPNKVHIYSRTDMEEMNAVSNIQEAGNIIVATNLAGRGTDI  
KLTDEVNENGG LHVIITFLPSNLRVEEQAFGRTARQGQPGSGRLVLNGAEEASKLSLEAD  
SSANTDSYKAIRD LSEKIRLAEVKEVRLPKISFEDRLFERNQEIYQHLRTTEENRYKLA  
QLEESWGFWLKDL MVSHKNSENPETQSAAYLEFEAFKQE QIALYNSDVATSNPIYQIQMG  
HSRLGRNNSYDESIRLLEQVAKPEDPYSFAGHYLLAYAYLRKNLAGKAKNDQGLVAAAYR

HMHIAKSHLEEVIPQLQSMQLLGTNSAGSPISTQITNKVDLFNHHLSYINHALKFIES  
SNPKNIMTVGKTKRFEFYAEGQAPMSEIRELNSLGAMQLYELDAKKPPKNILTSVVVII  
IGVAQVAVGTMAMASGGTLGIGLIASGLGDMYQGINAALKGEGIHLGEYFKAKAIEFAI  
NVISQGIADKLRPAKAGAVVKKGAELSTGQLLFKIGTRVGMRLAADQVVVLATKELSRG  
ALKKAINRAIRSARRELESRLSSPRIAAHLENMLAIDNLYNRKYSRQLSSAARDFFTRRS  
SE

>gene\_1731|GeneMark.hmm|946\_aa|-|4273|7113 >NVVL0100082.1 Rickettsiales  
bacterium isolate NORP64 Contig\_source1382A\_26648, whole genome shotgun sequence  
MENAVSPPVSGSTLQNLQLSAAGHQRSNLNSAERNALNQSIAQLRNSNQAGQNQYKNDL  
QKLDTVKKQILEHQREIIALNRDISSMEMGMDNISIFQDFMDEMKSILSKYSSVAGRRI  
DEAEMVVKTLPENELMHTDIKATCERQSLGAFNELLSKLGNNINAQDGEGRLLMHALMH  
GFFPALDLLARPELDCNITDNKGQTALYACTMPLKYPVQILSRTADVNLKLTLETGNT  
AMHLVIAATRDKLFSDEYDDYDLTDGSGNVFFDASQFVGNLVITGGTFTMGSASPTGRTI  
NQAKTMILLINMLCEGGLDFNAQNNQGQTPFMIACAHLKYLVTCLDQGDLDVTSKIDNN  
GYNSLLWVLEVRDTAIVERFLNDGFSADYRDEGRSFFWMSIYNQPEMLQLLLRHGADP  
SICGNSGSTALHAAAEETGAAKVMPIILLNHFVNERMDTPHQITPLWMACQNGHLEAVKYL  
LTHGANPALGRADMDISILRIANKQHLAVVQELVARDDVDANAPDNGGIYPIHAAAELG  
STDIVRLLLNYSDVNVRAIAPHQITALWLACQNGKAETIELLLQSGGDINLARADNGISP  
ISMAMQKNHVYVVKLLARDDVDLSAVDGANAGVIHYATVLDNLEIMQILVDKQIDINAQ  
NAAGLTALYVATLKNSEMAALLLAGGAEHDPNVQGFYPIHGAVHHGHMGMMEILLPFI  
NTQSSGGHTPLYAICQAEPNLELIQFLFDHGADSSISHAGGYFPIHGAVHNNHLLAALE  
LLLQNGVDINSHDLEKHSATPLYYSMGYGNQEIKLGTVDVLLAHGADTNIFEFDGDTMPH  
MAGYRARVDLMQRLIAHGASVNAQNDNGETALYVCIKQPDFATDEQKLLAVQYLLANDAE  
VAPESGLSALDAASQYLVSAMGFLEHPESVRPLEEFNIEVLGGDEV

>gene\_1732|GeneMark.hmm|603\_aa|-|7145|8956 >NVVL0100082.1 Rickettsiales  
bacterium isolate NORP64 Contig\_source1382A\_26648, whole genome shotgun sequence  
MGSVGKGFCKIFGINHKKRIIIDHEEERRVNELTNIRANNKYEASGRAPGVFSDFEELA  
YKDWLSQSGADNRNSPYYSFARSDSKQRTKVLGFNGHPNIYVHWEDRFDHAAYNRDMNSA  
ELAIRQCKWEIQREADDLRSIISQCSAQESPYKKQISKLKSVYERCKVEYTALCNKNRAL  
TNVLNEQKLLVVKKHDHDEALTHFRQLQESVKAQYREEFGANAQDAKSALRELITAEQQ  
RVYHKLEASTIEERTKILFGIFDNPYQQMFQMILSLGVDQDFLAYMAVKFEKMSAFEYA  
LEHGATVDGYFVDDATTLERILSSGKEDIARALQASDSVLCTALSAAQKHDLGILHQLY  
DSDPGVFSKHDGVVGYSLTHFFALAGYIDALELAIQLDPDCLSVLTLAEESVFAVVLRS  
SDEVIRLIGNNIDIELALQAFIASDNDEFLIKAMSCIELSLEIKAELESIIYENKTLA  
RELQNPDEIKQIFAIVALSGNNILAEECFQTFMDQIGQEYLDQVLNPEISDEMRAYFE  
ARNMAAEDMLADDFVENEALDNLLEFSELVGFDEFAGEALMGGDLVEDGLAGDGLVGEELK  
FDE

>gene\_1733|GeneMark.hmm|269\_aa|-|154|963 >NVVL0100083.1 Rickettsiales  
bacterium isolate NORP64 Contig\_source1382A\_26682, whole genome shotgun sequence  
VVDCIQGPKGCTGEQGIPGPTGPQGIQGPLGPQGIQGGIQQIQLPGTQDSSNTCAGE  
WILTGEIDPPTYLTPGAIFSLPNLVLITIGEWQSAHSSCKIIEGMPSNVTERVFDEIVVS  
GTDKLSLRSGKEGLYNVSLTTISALVYNRDEVSVDNDRFVYEIGLREDEIVNQTTPIVIF  
TVNSMDPVGLADQEVISKANTLGRMIVSSNTRLMLVFKEGRTYGLVFRFTKAPASGTGMTK

LLIASSYMRVVATRISDIPDDYVSTLPPQ

>gene\_1734|GeneMark.hmm|454\_aa|-|1256|2620 >NVVL01000083.1 Rickettsiales  
bacterium isolate NORP64 Contig\_source1382A\_26682, whole genome shotgun sequence  
MEGPGDKDILTGKYGDKAKIGALVEMAMNDKLPYPFIKNTIDPKLKFNNLRKFTPTILES  
QYKISGHNQNNLYHNWKGDLVSDPENSYDDYNIILDYYTEIERSKSSASGSISSFDSW  
SDRTIVKKVMTEIVKNHKKGGKMPTRLRDFSDALYNQVKRPGFRPTWLKGIWILYKGY  
PKDLNILNMSSGWGSELMISLVLGYSYLGFDPNKKLPGHDAMIVDFGNVKKQKVIYEPF  
ENYDLGKLFDAVTSPPFYDKEIYSSGEQSIDTYSDFSSWMVGFQYISNAWYSIKVG  
GYLIIHMSDIRGREINPMNLYIEQFLKNSSWVKMVGVSFSKNAGYPVWIWQKKNALNK  
WNRKRKRKFSTLYPSLFDKIIMGYVRTLTTEPKKSTILELALADVSPDVVNYARDTVFRE  
NYKVEYIVNHSKNTKTAKETIRKIALFAYYSENT

>gene\_1735|GeneMark.hmm|337\_aa|-|2801|3814 >NVVL01000083.1 Rickettsiales  
bacterium isolate NORP64 Contig\_source1382A\_26682, whole genome shotgun sequence  
MLVLVVTLSLLSVIAISLLIILFGNISKKTDTDVSDNVTLIENERTGWGILSDLPNGLRN  
ECNSYTFGALSDDDEYGKFTLDVETLNRLVPTLISEDVCIDSGQIAAKQQIRECIGKDNNDP  
CVDSEGKVFVKGQKEILYVPCAKRCKGTLISLNFDAKDPSNSSCIYDLSTGTAISTKC  
SLLDESQILVERTNNEKELKENDNGIYAKFLDRFNGKCVPLDEIPVIGTKIGLGECKQN  
SGYVWLLIPPTNIDGEMTSQQIVYTSTLENGPKLGNFRDFVSANELLSLNADGDIITLTK  
FNTSSGQSSQILDYRLYNILNGKQSDGNVDYPPYKFS

>gene\_1736|GeneMark.hmm|258\_aa|+|3886|4662 >NVVL01000083.1 Rickettsiales  
bacterium isolate NORP64 Contig\_source1382A\_26682, whole genome shotgun sequence  
MSGSTNTLNEFNSKVNDVFKDLIVTDVLGKLTWLYTSQGLDVSIDDMLKGMEMPVAVKE  
RKRSKTTTTSKRSKGKTVTGQCDYVFKKGFANNSCEKNIFVEGHKKCSSHMGRKSSAIQG  
PMITTKPKVSRKILPVKKYGSFGFITQGGIIVKESGVPTVVGKLTGKVSDDLDEDEK  
HAVKLGATKGGKIITNLSERTQIQPNKDEEDMSDEEDMSDEEDMSDEEEDRPGRPVSVS  
VDSLLTEEEMSQFVSADV

>gene\_1737|GeneMark.hmm|205\_aa|-|4698|5315 >NVVL01000083.1 Rickettsiales  
bacterium isolate NORP64 Contig\_source1382A\_26682, whole genome shotgun sequence  
MSTTKTNLSIVLDLDELHTITNVKSLIKMNILGNPNKLGVRERLYIINMNDGNNMWGI  
YRPHLREFINFCFDYFKHVCVWSAGSYEVHKIVHKIFSGINKPHIVYTRNDMKIVAGEM  
RKPLSHLMVGCMMNSKNTLILEDYKSFVTDPNNGLLIPAYLPSSDLLGVMEEDNHLEAL  
ILWLSSDKISHCSDIREVDKISLFV

>gene\_1738|GeneMark.hmm|627\_aa|-|5347|7230 >NVVL01000083.1 Rickettsiales  
bacterium isolate NORP64 Contig\_source1382A\_26682, whole genome shotgun sequence  
MNNPPAKVSRSLINLDDLIKSSSEIVYSYGEHYDKNFKVNQSYDVM MYKFKQNVDRIAN  
LVTLFKPLDTLLLSMGGVIPMAGINNIRTQLYKEKYADNHRKKINVNRFDVSLCPGTHL  
MRSVTEFIQTWISESAHSLPGEVILFSLTPGSSIDKILHSVPINPKGSHIHKSSCESI  
IRAILSTSNNTVISREFVTRKRRKIQISTKYVSINNLRSLIHRSLSKRKTSLYDFSILLS  
MLGNKYLPKCPSLDDSKLNNTIKGIDDLISYNNANVSLVDVKNGNIKWDSLLILLGKLL  
DKEEAMLSSQLKNRDKENSSSKISSMSVLVQSKNTTQTFSENKLVLDYNKYRNNWYSNAI  
GPRSNTQSLGILNGMSVVYDGGIYGARREDVIAMCINYLNGIQWSIDYHSLGISGVSNEW  
VYPKHYPFVDMYSVLRDVKVINEIYPKSKEAINTLHMLIMVLPMSFSLLPVVIENKL

KEISELSYNLPVSYILDVNNGEEIHLIPKHKLREVISFMGSDDIIRVSDDFSIFNSENKE  
IFVGPVKNGYYSTLNKNIIFKSKTNEKIKEDRDIDRQVKNFKNRRDSKTKKVKVKAYIPM  
TYRDINSSNTKSNISRFDMESIDVPEF

>gene\_1739|GeneMark.hmm|194\_aa|-|7348|7932 >NVVL01000083.1 Rickettsiales  
bacterium isolate NORP64 Contig\_source1382A\_26682, whole genome shotgun sequence  
MRLVFGCDILYIYALILFVTLFIMYLLVGGKKHAFVGLDENNKVTVCTKTVKVLHKETHK  
NVGKIKRKYIKCSKGETECRNVLEDLFNVYFDRCRPDFLKNPETKRNLELDCFNGLMLA  
VEYNGVQHYVHPNFTNQSKEAFVKQMRRDIFKIEMCDKLHIYLITVPYTVKRKDIKEYII  
SRIPRPILSKRKDI

>gene\_1740|GeneMark.hmm|243\_aa|-|8260|8991 >NVVL01000083.1 Rickettsiales  
bacterium isolate NORP64 Contig\_source1382A\_26682, whole genome shotgun sequence  
MNFSKEEVLVVTAKTKTLIVPKGIKLVLCIDIGLETILNEGIVYVSCSHNELNELIIPS  
SVTHLNCSYNEIANLMVPDGMTHLDCHGNKLTTELIVPNGMTHLDCHGNKLTTELIVPDSVV  
RLHCHNNGLTTELIVPNGVMHLCNNGLTTELIVPNGVTHLICHGNPLGDLSKYSELIKPK  
LVSLSYMCYEIVDKSNIPKCFAGVDEVTCDGCKNKVIKDLVYVSYKGTVGGYIRKTIKCK  
KCF

>gene\_1741|GeneMark.hmm|55\_aa|+|3|170 >NVVL01000084.1 Rickettsiales  
bacterium isolate NORP64 Contig\_source1382A\_26696, whole genome shotgun sequence  
DNFVISEFNSVFCPTDINDFKKIKFHTLFKSIAVRAGGNSIDYSSNNNCRIGNIY

>gene\_1742|GeneMark.hmm|42\_aa|-|311|439 >NVVL01000084.1 Rickettsiales  
bacterium isolate NORP64 Contig\_source1382A\_26696, whole genome shotgun sequence  
LLQGALLVGLLEYHIFLDLSVVVFEETAIKTEEELKSLEEDIK

>gene\_1743|GeneMark.hmm|83\_aa|-|463|714 >NVVL01000084.1 Rickettsiales  
bacterium isolate NORP64 Contig\_source1382A\_26696, whole genome shotgun sequence  
VGFQEVFRDVLDSQVDSQLEAIGLDRFIEIAGFVDINIEGLDQIRLLHLLLENDRDIV  
LSLPLEEVANVPLALEVDAMGEV

>gene\_1744|GeneMark.hmm|500\_aa|-|748|2250 >NVVL01000084.1 Rickettsiales  
bacterium isolate NORP64 Contig\_source1382A\_26696, whole genome shotgun sequence  
LFKAAIKRDNLEEVITAFGIDVKNSSMYQTLAFIHRFIREGEDEDLEELANDIDSFLEKA  
SPEKLVSIACFVGYDIGYMPDIDEPREAI DLFL ENASPKRLASIA RFISHVSYIHFG RDD  
RPDAASINKLRIDQLREAI SLFLENASPEEIH LITSFISYDIDGLRGAIGLFLENALPEE  
LDSIEKFVDGASERVLNVVDINQLREQIASLLGKATPRKLESIASCINSESEDGSSAVGF  
TSDVVELRNAINLSFENATSGK LKSTIKSIFADILES KIALFLKCETPENLKSIVEFIGS  
EKYSDPKFTQYFLTYSQFCLLKVAIAAGNLQQVSESIQANPELAERQAHMLAIDA IKTN  
QLEVASQFFRGAYLDLPQGLDLNLLYDKCEVSLTMAAQRGNFAVTIQAFGIDLQKFVEY  
QICAMLREWLEDLKRGNFPVRSSMKSL LAIELDPNGDYADLPGQTVETPEKVQAMLERLG  
SSFESYNLHLYSLLHILAT

>gene\_1745|GeneMark.hmm|142\_aa|-|2265|2693 >NVVL01000084.1 Rickettsiales  
bacterium isolate NORP64 Contig\_source1382A\_26696, whole genome shotgun sequence



MKNLDYFLILKLNMRMSRSTENPLELRNISRLPEELSILERSLLEDKLAAALESEGMTI  
AELAQEKEEELYSLICFAIRNNHFAEIAALLKEADVDSILYKYSLLTEDPQQDESAEQL  
GQSQTMRLMTLSGMRRVEKTII

>gene\_1746|GeneMark.hmm|262\_aa|-|3046|3834 >NVVL0100084.1 Rickettsiales  
bacterium isolate NORP64 Contig\_source1382A\_26696, whole genome shotgun sequence  
MTIRKTKNTILIKNETIGSNEIAELASLLQENPNLTTLMINESQMDAATIASFAELFKEN  
NTLTTLNLSNIGDNGAAALAEALSNNHTLTTLFSSAGIGSAGIDHLANGLQNNYFLT  
LIFWGKQGHPEVQPITAIIDRNKAFLKNFAKMLASDADATTNNQITWSHDLINYLKLCDH  
SKLSEYLIKLRVCDNSDASNLINNYHTQIAEFQHEHANEVSDMLEECLALHAFPTDLTP  
HVFSFLPDVDSGIESILGATND

>gene\_1747|GeneMark.hmm|1186\_aa|+|4044|7604 >NVVL0100084.1 Rickettsiales  
bacterium isolate NORP64 Contig\_source1382A\_26696, whole genome shotgun sequence  
VRRELTDSGLTKMILETYPSSKEELYNEHLQEISGASFTFRELDIIACIVHNRGEKKIA  
SLLSISYRTVGSVHRNIMSKLGYSSREYIIDAVERSGKLQHVRRQYYFHLVMEASFELHLQ  
KIGGVVNRSGIVCATNFSVDTEEEKSLELFTESLTIANITLTDINLLKAEGSYEKARHN  
LYIISTKSVNKTDLHQKTGDAGKAPQNESKKNIAVCFDQDIDLLTIQDLEHVDFRSKSNY  
YFSVLELVGKLTGKPLAHGIIQEFKDEHQDLQKSWAGTGITGGEFSDNGSTHFMSKNAAI  
LAGCAGIIIFLVYLLVWNNTPSGNNNSNMQVASHNQTEIWNLPKQLEHYTQRAELTKS  
IWDKFRENKGSKRKTSILTGLYGLGGVGTSLAKNVIHNPSSAQHYDFKGWFSMETKE  
LLQADYFELGEKHLYFTKNISDKQKILRVKSWLERRGNILLVYDNAPDMSILRPYLPDNG  
HIIITSRNYKLPGVIEVDVMTEKEATKLLDKLIPNKIKQDKAYDKDLKAKELGYLPLA  
LSQAGAYIAENMLTIAGYLSLYNTERDRLLSDKTMPTMDKHAPAYITWDMMSIKKLQQLKQ  
EGEEALDLLDFIAYCYPENIPKLLTQYLYKKADNETSVKLNTVLNLLRRYALIKITPHT  
VSIHGLVHTWLKSKHSTNKKLTLFKRSIPIKAIYPWENKTMEDVSLIKLILPHVTVIIS  
QMQLTAEIEYASLLSILGDSYYTLGDYAKSRQFFDKVLTINKKHFGDNSIEIARTSHDL  
GKVYLKLGNYAKAKELLEKALRIKERYGESHETIISLHHLGRVYLRGKYTKAKELLE  
KVLVKEKYYGKTHINVIYSLHILGKVVYLCGNYTKAKELLERALVIKMHYGSKHVEVA  
YSLHHLGRTHFFQGDYKAKKLEKALIMKERYYGLKHVETARTLHYLGRVYSYSSNDMK  
AKQSLEKALAIQELHYGTDHMEAYILYHLGKVNLRSLNYVKAKELLEKALMINQTYHGS  
NHNTLTINALGSMGIVYFALGEPKRGQELLGKASEMLTKLHKKESIFVANSLANIGNAYR  
VLNNHHEKQLLQSLTLRKYNYDKITIAKVLGNIGLLYGALGKPEKKKEYLENALLI  
FKNHLQTEHPDIRKTIKYLNSDNFAKRLNKNNSKRLGYSIIVLP

>gene\_1748|GeneMark.hmm|446\_aa|+|7685|9025 >NVVL0100084.1 Rickettsiales  
bacterium isolate NORP64 Contig\_source1382A\_26696, whole genome shotgun sequence  
MSASSDLEYQCSTGASHTDDGTGALRVEHQLPESKVLDLNFGGPVPIWDEAKVSEWENQE  
GQILSESGSITPTTLGSEYLLSTDINSVIQFCEQLSIERQEQLKEERSKFEEDKRSFLLQ  
IQRYPDVALSPLKNDSTYGLALLETEEIDLEEISKLFTKISKLLQHFNPNAIMKALKKL  
AEDERYFRLVEDYSGFALPDLSTPPLCLRYYQEHNGFLSEKNPHTVVSRLFVLLAENLST  
CINAPLEENELHPLEQLIFQAAIAKLKESAAPSGVACDTFVRKNGVIHNDQGHPEHCVV  
LWKVGDVYVYLDIPNRHSLSKELYQPIEVILKATDGPNNHGNVEVDTQGVVYKRLQNAIG  
RGDNDARDCVDLAIKLELVYQCSRTEETVMEAAVKQIASLGSRNAGELQGKNYKNMQT  
PRNFATSDADTRHNARLLYIQNLHTN

>gene\_1749|GeneMark.hmm|206\_aa|-|2|619 >NVVL01000085.1 Rickettsiales  
bacterium isolate NORP64 Contig\_source1382A\_26742, whole genome shotgun sequence  
MFGGLAKLSMIGALTCFVLSAAFTLLFRMKEADAWVSFKSLFKLVLSLVTAVLFYVVGIF  
LFQSYWSLQEMHYSIYRQKDFNQEVWFEEERKYHPAPGRYAWIDCTRGRMYDDLHKHNLK  
FLMSKKEIEDLLSHSSIKRKYGWLYKYSDCFQYMLGSGCHKGPPSLLVFCSIPFTNSYRHY  
LTPEKDRYTEIYEDNEERQKIINKLY

>gene\_1750|GeneMark.hmm|120\_aa|-|659|1021 >NVVL01000085.1 Rickettsiales  
bacterium isolate NORP64 Contig\_source1382A\_26742, whole genome shotgun sequence  
VDAELMQFVEQVKTEHGIPHIDLFTGHSLGGSLATLGAIAQNSEVVAFDPAGVKRIVETR  
FGLDVDESMVTNFLSKANVINGVNKQFGRVIQLRSDVGEYNTRKIHDLSESSMVANNGV

>gene\_1751|GeneMark.hmm|285\_aa|-|1033|1890 >NVVL01000085.1 Rickettsiales  
bacterium isolate NORP64 Contig\_source1382A\_26742, whole genome shotgun sequence  
MKRVSLESRRIQGDNEEIFKQALEQQDVEAVRSLISKGNFNVNGSIFYQPLIEAIKLDLV  
EVVGLLLGAKANPNQPSRHGNTILEEAVARGNHAMLSVLEHGADPKQSSIFNSPLRQAI  
EDGNHKAALLLDKGCDPNQGRAFHDKPLFIAQEVGDEDMIALQKHGANLEISMNPPAL  
VDTETYERDDGAPSLTSFPGGGVFAGGGIFAGGSITITARSFENTGTMSAGDEIKLNVES  
FNDTGLINGQKVTLNLQPRNDLAAESAEGSANLAGDSNGDDEVL

>gene\_1752|GeneMark.hmm|242\_aa|+|2624|3352 >NVVL01000085.1 Rickettsiales  
bacterium isolate NORP64 Contig\_source1382A\_26742, whole genome shotgun sequence  
MFLFEILKSIFTKQKNQTSEIDNPHNIYLEVPYSQKEIAKNYGAKWDCKKKKWFIPQGIN  
PNPFERWMPCEEENFRAKYFYLGQAYRNCYECNKATQVNAIILPEGFEAIDGEALDDLEE  
LGIQPKTIPFCRQDYLSILSYLTYISSDALEEIHKYTGRAYFVKKHKSIVTGYSYRSLCQ  
HCSAAQGDNFVISEFNSVFCPTDINDFKKIKFHTLFKSIAVRAGGNSIDYSSNNNCRTSN  
IY

>gene\_1753|GeneMark.hmm|121\_aa|+|3306|3671 >NVVL01000085.1 Rickettsiales  
bacterium isolate NORP64 Contig\_source1382A\_26742, whole genome shotgun sequence  
LTTVQIITVELVTYINYTAHGTIDFFECALDAQALPHSTTEVCLNSSISRFDSELLNLE  
DVDTKWYEKVRSLWFDLDIIAMQDGNVFSKTDLTEINQTVQELKNLVEDKVKIIPEDYM  
L

>gene\_1754|GeneMark.hmm|91\_aa|-|3675|3950 >NVVL01000085.1 Rickettsiales  
bacterium isolate NORP64 Contig\_source1382A\_26742, whole genome shotgun sequence  
LLATIGAEGFFILDITYTMFNFKIKKNLEFSLKFKCFSIKSLLALKLEPVTPLIAGEII  
VLRIFRGAPLMHSLQRPVWLPKFIFLSYFII

>gene\_1755|GeneMark.hmm|1045\_aa|+|3937|7074 >NVVL01000085.1 Rickettsiales  
bacterium isolate NORP64 Contig\_source1382A\_26742, whole genome shotgun sequence  
MVASKSPEELLALKEAMLKRAISEGTLAEVLGEEGLTIAALYEQNEKVLVSLICFAVQEN  
RFAEIAELLKNANVDVNILYKHSVLVETAKQNEYPEQSEDEGLFSEDPSNEVDSKWDVEH  
EDGQEDSHITYDSVLVETAKQNEYFEQPEDEGRFSEDSSDEVDSSELVEGHEGNEESEEDH  
HITYANRLFKAAIETGNLPEVISAFSIDKSSMYQTLALIHRFIHKGDDGEVEDLKKDI  
DSFLEKASPERLGLIASFVGYDTGNIPNIDEPRGAIDLFLENTSPPKRLSSIASFIDHVSH  
ISFGRNDRDLAASINKLRIDQLREAISSFLENASPEKLNLI TRFISYDIDELRGAIGLFL

ENALPEELDSVEKFVDGASERVLNVVDINQLRENIASLLEKATPRELESIVSRIRDESED  
GSRAVEFTLDVVELRNAINLSFENATPEKLIKSTIKSIFADILESKIVLFLEHEEPEDLRS  
IVEFVGREKYSDLKFTQWFFTYSNFCLLKVAIAAGNLQQVSESIQVNPHELPERQAHMLA  
IDAICTNQLGDAQAQFRGRDLNLLYDECEVSMLAIAAKSGNFAATIGAFGIDLQRFAEYR  
ICSMIREWLEDINDTERGDFHVRSSMKSLLAIELDHEDNYADLPGQTVATQEEVRAILKR  
LGSNFELSYNLHLYSLLHILATEGTLQIRGLPGVEFHGVFRDVDLAQLEAIGLDGFIEI  
AEFFDINIEELDQIRLLHLLLENNDTARALSFLGMELPENETIEMLKLTAAAGRLQDM  
LSYVSRSYGQSDGYISRILSKQDLYSLAYFAVQENQLDGIKHLFNELRDNHCFHRESWDL  
FDRKDKANLAQLFEVAIAAGNLAETMEAFKINITVLYAYKIRPVLEEWVNDVCASDSEFL  
EALIYKVDYYMHELSELSARLLRGEDLTPDDAQKIAQSFDLSSYSGGGIRALEISAERG  
YLQEVLRFLNIDISTISENIQSLLLQAAGVNQLVNVVAECLGVDLSALDMDTQTPLGFSLI  
PMEHSERPDALSDVDITVAGDLAIL

>gene\_1756|GeneMark.hmm|93\_aa|+|7121|7402 >NVVL01000085.1 Rickettsiales  
bacterium isolate NORP64 Contig\_source1382A\_26742, whole genome shotgun sequence  
MSNGQKKYTSEFKSQAISLVRDANLPASQVARDLNNVNTLYNWLNAANKMLNNPTDKDS  
LSEIKRLKELAQSNLERDILKKAAYFAKSTL

>gene\_1757|GeneMark.hmm|232\_aa|+|7487|8185 >NVVL01000085.1 Rickettsiales  
bacterium isolate NORP64 Contig\_source1382A\_26742, whole genome shotgun sequence  
MYGARKIKKRLEQCKIIISRTRIARLMSAAGLQIKTKRKYKTTTDSKHNLIIISPILLKRE  
FYVAEPNSVWAGDITYISTQNGWLYLASVMDLYSRKIIIGWSMASSMKASLVNDAITMAIW  
QRRPAKGLIWHTRGSDQYCSKSHRQILQDHGIVQSMSRKGDCWDNATSEFFSTLRELK  
ELHNFADQQQAAAAIFEYIEVFYKIRLHSTIGYLAPTQFEDNERVLKKSVL

>gene\_1758|GeneMark.hmm|166\_aa|+|8233|8733 >NVVL01000085.1 Rickettsiales  
bacterium isolate NORP64 Contig\_source1382A\_26742, whole genome shotgun sequence  
VVKVGMHKVLYKKTKEQSIDRHEDGARDCVDLAVKLILELDYQYSSLQGFKELMQTIYKT  
ENSTLDYGILELIYSCNRTQEDVMTVMKAASEQISSLGSDHAGKLIPLKHIPTPRDFASS  
GTAARHAARNDYEEAHLLKLCQYSGGKRNSVQVLYKLCHEALIF

>gene\_1759|GeneMark.hmm|74\_aa|+|8919|9140 >NVVL01000085.1 Rickettsiales  
bacterium isolate NORP64 Contig\_source1382A\_26742, whole genome shotgun sequence  
MTKKRQVEPYEITAAQTGENELLSKFVSKALEINYDSDAPKDEDERYDTLICDALWHAA  
FNEQDESVKTLNG

>gene\_1760|GeneMark.hmm|267\_aa|+|58|861 >NVVL01000086.1 Rickettsiales  
bacterium isolate NORP64 Contig\_source1382A\_26876, whole genome shotgun sequence  
MNHTPRLNLPLIHSGQAQKEITHNEALSMLDVLINPVVQDIGIIHPPDAQEGQIFIVGTE  
AQEEFKHQKLAQRIGQGWRVTPSKWLEATLSDSGSKHRFNGEYWAPSSHDIRDSPQA  
ISTEIDQAEKHPKVEPQLQGDMLINKDTGEYLRVGHLEEELEPQGTHIDTNIQIPRHSI  
VIAITMRVTEELSGISNFSIGVADDVERYGQNLNADTDTTNIGLTNHPLAYWTDTPIRIT  
ANDGSFTGGKINLTIQYLQPHGAWDWD

>gene\_1761|GeneMark.hmm|87\_aa|+|908|1171 >NVVL01000086.1 Rickettsiales  
bacterium isolate NORP64 Contig\_source1382A\_26876, whole genome shotgun sequence

MKLAQSFKTLTFNGIATIAAWLATNYDVDISEENQMAITTTIMAIINILLSLFTGKRLKN  
KQSENHAESQNINPAPEKESIQTEQGN

>gene\_1762|GeneMark.hmm|52\_aa|+|1248|1406 >NVVL01000086.1 Rickettsiales  
bacterium isolate NORP64 Contig\_source1382A\_26876, whole genome shotgun sequence  
MDNQQEVQKDFHYLRKLRQRAEDSGFLAMRAIISIIIGAMAVLLWEGVKILS

>gene\_1763|GeneMark.hmm|140\_aa|+|1438|1860 >NVVL01000086.1 Rickettsiales  
bacterium isolate NORP64 Contig\_source1382A\_26876, whole genome shotgun sequence  
MINSTNQEKTTIKSPIPYFKHKELACPQTNQLILADGFAAKLLQLRIAFNQSMIITSCCR  
SKAYNREVGGHPRSLHVYDKPYHNTDGTCAIDIAVTNTTTKAQLMQLAWNLGWSIGINEK  
FLHLDRRTDHTNLKQMVFRY

>gene\_1764|GeneMark.hmm|2077\_aa|-|1884|8117 >NVVL01000086.1 Rickettsiales  
bacterium isolate NORP64 Contig\_source1382A\_26876, whole genome shotgun sequence  
MSSTKWNYYELAVINRDIYKVLNFNEHNYGLEEITKLGTYIKSISGKGQNWNGFFAILLE  
KNGKHIIAIQGTNASLGAPITSVGDFLADADLIAGKMPERQFSNLMEFVERVKTEYNIQH  
IDLFTGHSLGGSLATLGAIAQNSEAVTFDPVGVKRVITYDFDFVDDSMVTNFVSKANGI  
NGINKQFGGAIQFQPNVGEYNVEGLDSMSVSASVPIFYPIGMPFSVPLSLLPNREHALIQ  
KILIKAVKYKILFTHSIENMAKMFNKDGSIAVSYAELNSYGGNINEAIHSTVNYAQSQAF  
WNHVTKRAHQNPFAFNLSFEELKAKLLNGYLLNEEIIKIVNKEISFYTQLSGTNITDPE  
YSIDMDSHLSRTQELLAPIAQKIKSGEELTDEEFYVGSVAQGYFIKKYHHSNGEDHEYN  
YNFITGTGEVGKFTNAMLTRNCGTDGAPQAVRKCHYSKIMLAFRDVEASSANPNRALS  
DHDQVRAQAFADVGVDQNADLLGFVCALSNNRSKCGSVNEVLSELKPHINITLQADGTS  
VVTPKALANFTSEIITAIAAFQETLTDFGLTSQTRGASFVAESADSLAQLSGVDSNMID  
RKYGSDDYSDAIRTSVGDTPVFSVRSRNEEVRIPLPGHGSEQKVVMMADPEFTVRMAIS  
PVSFLRPEQLETKSVLYSVVAPSTDDSRLLVVDISPEIHDRHEAKSSEELGSMWRDGVAA  
YGGHHEVRMPAGILNGDGYVNVRPSSIVTGGWRPGAAQLSDFSTDSFLQQLPGAMMQESP  
ECSRSVVMKSRLEFNRCRISAFDQLNIDPLVVDMSARGRSGIKLTHWQDNEVLFDIDGDG  
YLEETGWIRDKTGLLVLEDEGVSVHQLLSEHFQGGSYSDGFEALRQFDINGDGIIDSS  
DPVYHRLKVWFDSLKDGICREGELKSLTELGKQIILNDLVEVNSERSGNLIKQKGVIVM  
EDGSHRVIASVDFLANASGHKYEETEGGIRIASVGRNVRIVENKFFQKLDDEEVERETAT  
FFAKEGSPTRLEADALKVDNICASSAGSVLVGGNGDNWLGSDGADQYLGSGGNNTLVIN  
EHDRQEDIQGGIGFNTVFINSVAGRYFSLDSSGIAVVYGSRAGDVLDRSTNYNCFVQAG  
DGSSLMFGGSAASVLSGGAGDDIITSGSGGGILRANLGNNFLIARGGNTILESGLGFNYL  
RGSNENNIFKCNKAGFSICDGSEGKFNALQLAGSIYDYSMEYNEEGHVVRNKNYSEFS  
AVLINIHLVNFQDMRNYNFNLILPQKWVMQNDFSNLQLIDASELFSHEFGPRGQQIGFAK  
VHKTEGCSIQDEQGRNLADIAEQELFFIERFSLAIDSDHKGPVFIQYTPRTRESRVCF  
DTKDGEISNSAISLVFRGDISEISNYFDLLRIDYLRENNYLGQGVNVQVCEQRSDHAQ  
GVWSVLKNILPEGRLYFTDQLFSAEHAKMDVLNFSISFHSPIRTNMEYNHAIGYTGGLNH  
LDAAARKTVLEGRDGLGLAVIFAAGNERQDGGDANYDLIKSIPSIIVGGISRKSVLGLG  
EQPNPEFSSPGSNILTSAPANFIPAVTHGQGNKYGNFYKDSHALVQGTSAAPIVSGIVG  
AMLQVNHKHTIYDIQKILAYSSKQIESETEWQFNGASTWNGGGLHFSYDFGFGCIDAHA  
LLAQNWLVGNRQYVERKVVFSNGTFHAKQSASFNSSATIDGEIVSTNVNFIKEIDIFN  
LKLSLAYDGGQFTILPKVGGDDLSPFTLSYAAMTPLTHFLMGMRIDSQIGCLFENTGAGD  
MKFGVVNMTAGVQRDNNTSYIFTDECTKFYDEDRATLAAQNQFNTLNLAAVSYSSRVNLQ  
EMVMYLAEQLYRLEGAFHNVISGSACTHITGNEENNIIVSNGSYSEVTLITGHNIVSSSS

QVNSTTKITSGDRADTFVIKRSAGSTIIIEGFKVLKFDTPSEQMYSVNVNLAAFEEITV  
TSDLILETEGSDRIICLPDQKVVVKNVDSMRGYNFRFNKDFYIAHEFEEDFMHNNIIQN  
LMFGPELSGVDAGNSILASITPEEVGHNLVDAFSGMA

>gene\_1765|GeneMark.hmm|213\_aa|-|8110|8751 >NVVL01000086.1 Rickettsiales  
bacterium isolate NORP64 Contig\_source1382A\_26876, whole genome shotgun sequence  
MFGEFAKFSMVCAVVCFILVVAFSFSLSRMKEADSWVSFKALFKLVFLVTIVLFFLGIF  
LFRGYFSLQKMHYSIYRQKDFNQEVWFEEKEYHPAPGVYGS LN CARGRMYDDLHKNHLK  
FLMSKKEIENLLGHSTVKRKYGWLYKYSDCFQYELGFCHQGPPSLTFCRVPFFTSYRY  
LVRQGDGGKAVYEDNEERQKIIDKLYNKGEKDE

>gene\_1766|GeneMark.hmm|62\_aa|+|2|190 >NVVL01000087.1 Rickettsiales  
bacterium isolate NORP64 Contig\_source1382A\_27198, whole genome shotgun sequence  
FCFNTKRYNSLFSRNVSLKIPIVSAAMDTVTEYRLAIELAKLGGLGIIHKNLTNILQCIN  
PL

>gene\_1767|GeneMark.hmm|234\_aa|+|172|876 >NVVL01000087.1 Rickettsiales  
bacterium isolate NORP64 Contig\_source1382A\_27198, whole genome shotgun sequence  
MYKSSIRAFVLVAFISFALSGCLPVLFTGAASSVAILAKDRSAGEAASDIKIATAIKASV  
RSNFTRLYTAIKVDVIKGRVLLTGMVEKEDDSIEAVKIVWAAKGVVEVINELKLNKKG  
FDLIQYTRDMLTTSQIKSQTIINRDIKFINYTIITLNDVVYLFGLARSEAE LASVASIAS  
NVGRVQKVVS HVRIQP VAGKTKRGTKENSTKENRLLLEQKDEDLGGQDEGAGDEW

>gene\_1768|GeneMark.hmm|226\_aa|+|866|1546 >NVVL01000087.1 Rickettsiales  
bacterium isolate NORP64 Contig\_source1382A\_27198, whole genome shotgun sequence  
MSGNIRDSKFYQAAYSLCSILLVICLSLSLASCNSAKKKRLTYQTLRDDPHNTHYKGYH  
KIGKKYKIKRRGYRPREVRRYNKVGIASWYGSRYGFHGKKTANGDIYNKNLLTAAHKT  
LPCLVKVKNLENGKSVIVLVNDRGPYAKNRIIDLSEKAAKVIGMRKGTAKVRVKYLHSE  
SKQLLKT LRLKKKPGAKAKRSVRNKKCSVNCYVKLVNLKHRRKRIR

>gene\_1769|GeneMark.hmm|91\_aa|-|1598|1873 >NVVL01000087.1 Rickettsiales  
bacterium isolate NORP64 Contig\_source1382A\_27198, whole genome shotgun sequence  
LLKIELALKLLTRGISWCTISLYKGINYIIMEKVSYSYTRQNL SKVLNQIGLDSEASCIE  
TNYLLKSGGNAKELITGLNEANKCIGTKIDF

>gene\_1770|GeneMark.hmm|300\_aa|+|2080|2982 >NVVL01000087.1 Rickettsiales  
bacterium isolate NORP64 Contig\_source1382A\_27198, whole genome shotgun sequence  
MSSARTDGVPTHTSAENILPRLEQDLREDGLRLTPETLRKIIDNPHQFDDVLEPKMVTEFA  
SMTAEQHDSLIDLLDKPHILHTEESRDSHIVGKFKALMTKLWNKATDRVEDALDEAEDF  
FDGLIAALKKLASDGVSSLGELADDAIAEHVPEGELRDALSGAADSLEDHLEDGVSKVAN  
VAQNGVSKVADVREEVSDGLDVAFQAAGKGAIDDAASMPELSLDREASVLRGEDSGNER  
VTFPEGAPGAGDSELPLVFVLEGDAEPAHLSEPMALVPAPGAAADLLVAGDAVEGAADGA

>gene\_1771|GeneMark.hmm|105\_aa|+|3353|3670 >NVVL01000087.1 Rickettsiales  
bacterium isolate NORP64 Contig\_source1382A\_27198, whole genome shotgun sequence  
MKNKSKLLATAFAVAAFSAGSVQAGGHG NMEKCHVVDSHGKGLIKAHKADCKSKHNCSG

NNEAHDAEAWILVPKGECAKINHGDFSGVDKETKDKIETHETDH

>gene\_1772|GeneMark.hmm|279\_aa|+|3786|4625 >NVVL01000087.1 Rickettsiales  
bacterium isolate NORP64 Contig\_source1382A\_27198, whole genome shotgun sequence  
MSNTELGIGLRAQHLEQFVTERPSIAWVEVHSENYSTLGGLDFLLIELRKHYPICSLHGI  
GMSLGSASGINAGHLRQTKELVGAIAPFLISEHLSWNTHDKFLPDLLPIPFNDEAMEIFS  
RNISVVQDALKRQILIEPSTYFSFTSSNYSEPEFLNLLAEKTGAGILLDVNNVYISGLN  
NGWSAEEYINNINPLLKEMHLSGHSVKNLAGGQALYIDSHNCRISDDVWDLYRKALAKF  
GKVPTLIEWDENIPKLEVLLEEASKAQEYVNMQSGGVYA

>gene\_1773|GeneMark.hmm|268\_aa|+|4618|5424 >NVVL01000087.1 Rickettsiales  
bacterium isolate NORP64 Contig\_source1382A\_27198, whole genome shotgun sequence  
MHNIAQIQEEMQNAILGREANLDFIEQSAGISTKERMQVHLDTVFSNLTNLKIYPGIW  
QLIGEECASGVALAYSHDMKHLVGRERINNFGEHFPEFLRQFPSIKHLKYLDPYAQLEQL  
RYKSYSAKRGKVVSLKELQQVFQSDVEVSYKLTNDSVLFKSIYPLMSIQELLENKDSK  
PLDLTETKCFIICKTQKKLETLSAREAEWNFLRSLANSDAVGNSVESRVGNTIGKAMES  
LPPENIEPELTKIIQLMLSKQMISKIYV

>gene\_1774|GeneMark.hmm|165\_aa|+|5417|5914 >NVVL01000087.1 Rickettsiales  
bacterium isolate NORP64 Contig\_source1382A\_27198, whole genome shotgun sequence  
MFNLIHKLQITAPGRAYLAFTKFADDYLFSLILFMRIWMAQIFWYSGLTKISSWKSTLY  
LFEYEVAVPIIPELAAILATATELSAPIFLVLGFMTRLVALPMLVMVAVIQFTYLDRE  
HLYWASFLGVMILRGPGIYSIDCIINHKTIKYKRNSGWSHLKPK

>gene\_1775|GeneMark.hmm|526\_aa|-|6007|7587 >NVVL01000087.1 Rickettsiales  
bacterium isolate NORP64 Contig\_source1382A\_27198, whole genome shotgun sequence  
MVERNKASKAIIILSRVSSKEQEEGYSIDAQKFRLEQYCIKRGLEILKTFEFSESSTTGHR  
EKFNEAINFAKEQKEIIAVVSDKVDRLQRSYKETPLLNDLIAREKIELHFYTENCIIHKY  
STSQEKMTWNMFVMMMAQSYVDSLDRDNINRSIAQKLREGEWISKAPIGYAHIRAERKVGSR  
KGKIVVDEDRAPLIKRLFEEYSTGAHTLGELVKKTKEWGLYNVAGNRGQLSLSHIHLRIQ  
NPFYYGVMRVQRTGKEYPHIYQPIITKELFDRCQRVRLGWKNKPFKWWYKEYIFRGLIKC  
GATGRVVTSDTKRKYANGKTGEWTYLRVWNPDPNPKKAMFVKEEKILKKVEKVKSMHLE  
SAELAKAISHIKTSSDAERSFHKNQIKELHSAHTKTKSRLDRLTDLFDGDIDKVSYEK  
RKQLIQKRADIVREIENHNRTDDKRANYLIHTIELASRASEVFKGSTTSEKRKLINLVLS  
NLELKDQKLSYTLHSPFDQFIKTAKTREWRPLRESNPCLHRERVAS

>gene\_1776|GeneMark.hmm|63\_aa|-|7812|8003 >NVVL01000087.1 Rickettsiales  
bacterium isolate NORP64 Contig\_source1382A\_27198, whole genome shotgun sequence  
MNNATQDEIFNDIAAGIRKSSKTTMTEAESRQAARRLIEFCRIMIDVQRRIDNDKNDNNN  
KVS

>gene\_1777|GeneMark.hmm|81\_aa|-|8024|8269 >NVVL01000087.1 Rickettsiales  
bacterium isolate NORP64 Contig\_source1382A\_27198, whole genome shotgun sequence  
MKLELFMKITEMTIPTLSKFLGISQTQATQYLYKNTMPRPENMQKIHSKTIGLVAANDFY  
GTTPEKLAIEILLKDKKITIPK

>gene\_1778|GeneMark.hmm|256\_aa|+|1|771 >NVVL01000088.1 Rickettsiales  
bacterium isolate NORP64 Contig\_source1382A\_27253, whole genome shotgun sequence  
INIMLKKALVTTLITLALITSGCASDPGSPLKRSANNKLFDRKGFQGEKRAPLYNKKY  
ISKAKRNILAGDFDEDDLEDDNLYENTNISQENIEMYREMIEEDLANMKKSKKKRKRK  
IRPFPSISRANSKLTSPDHAANLELRAELQQIKALLHEARKEFSNNKCPTIADLKRESAK  
LDKKAQKPAAAPVPRSVQAGVIPPAPAPAAPPAKQDPAMQASLKAPASLPSPSPSDAA  
PSDTTTPQANNSVKAI

>gene\_1779|GeneMark.hmm|27\_aa|-|1228|1311 >NVVL01000088.1 Rickettsiales  
bacterium isolate NORP64 Contig\_source1382A\_27253, whole genome shotgun sequence  
MVTSEFVDVIAGAGGFVVDVAGVGLVD

>gene\_1780|GeneMark.hmm|209\_aa|-|1379|2008 >NVVL01000088.1 Rickettsiales  
bacterium isolate NORP64 Contig\_source1382A\_27253, whole genome shotgun sequence  
MGYSESYPNKEPATPFLNLDQLSALRAVFTEEVTSFKDGM TTLQNALRLFQEYMIGAGKE  
DAQRQIQDYMHVLNQQMKYVEFFSEVGG AALPTHEILSSALTECREMLHANFAYQVKTVE  
LEPGREVAAYEKAVDYLQQCPDSQVCKTKLAQAHVHMAKLANDDTTAAIEHYVAAIGYDK  
TLAEVYEKLGQLFQQGGEYSKEASIAKQC

>gene\_1781|GeneMark.hmm|365\_aa|+|2203|3300 >NVVL01000088.1 Rickettsiales  
bacterium isolate NORP64 Contig\_source1382A\_27253, whole genome shotgun sequence  
MAKASNSTIVQSIHPVQSIQDGNPELFTQRLREYQQNGSFDCELTNSIISAFMESRNAK  
FFSPIENARSLGFFGSHEIISQVDFLAKNPNI DFAISLIEETVETGVFQQIPTLF TTK  
SLIKIQDQSFYECCVDASFVKVLINPDIYLGTKINSSHLITLILREAISNDYFDLIAKIS  
SSVCLSNPTLILNSDTIGSII EQQQNGDQYLEFAHTIFIPLSKYIQENKPEQSLMELYK  
NLKLLVQQSLPECTDLKTFEPNEFSTVYIVGND SISDADLSEFANRLGLDSTLGVVVLGD  
LTNVTTEGIKLLKDALGNHDAILQLSLDLPALVERVKLISSTGEIDNFPEDLIEFHNL  
LGNVE

>gene\_1782|GeneMark.hmm|799\_aa|-|3355|5754 >NVVL01000088.1 Rickettsiales  
bacterium isolate NORP64 Contig\_source1382A\_27253, whole genome shotgun sequence  
MSGAQIALRQQNFLDSMRDLYQAGTNHYHEGKMDEAEQYFAQALKPVFSRYLMADSPFNI  
EDIKEEIFAIYRLGKTYLHFNNSSDHYLKTA AIFQYCSAFVKKHDMDSNISGVHLSSD  
DYPRYLSNIACFLEKQLLHTLCQEDITATLPRDYFYTNHPQRITRYKAGLEQVRLITKKE  
LESISSIENISERAKRVEELYKNIATFFVDES NKGFIQQLLDEC FDDLGLPNGCEY AIS  
AMGSLSLGTMTPWSDLEFIILINEDNEGYKEYFRKFTVLLNMKVILLGETFLAAAGIKIL  
NDYKSENPSDICFFDNVTKGGFCFDGVPVWYACKT PLGRQGYSNHLDYELILTPRQMF EFQ  
SDSWFESDRHLVQALRSVSLIASSADGKKLFDDYRSLLRDMTAEKHCSLQARSLQLLQED  
VGKFSLKITEEEEGSPLRVKQDIYRIVDRVIVALFNYYNLM PDNDQPALTIWQMVD RMVN  
ETIIPYQAGQYLKEALSIAAELRLEVYSEKNAQ NEMIPDSILLDTKLLHHFYCIILNMQD  
VIEYVSGQDSGELVFFDDSHYIKGQVHARFQEYEEAFREMRLAFNTMCIPQKTAPEICY  
IVQNLVLLSSKIKDPKTALSMIDIQSFQHIDLRFVTNSDAFYHMLLFEQLADLGS LFFR  
CNMHAEEIIYKICWLLSNQYVYCNPDFHGTIKTNLLGM IKELANTDNHVSVAQEAIYCI  
ANFQFILSKLYSNGQYAESISRANQALQIFARLGGDLSAFDVDKIHYKLEAIYYCLEN D  
AELKSLGDTQTVGDDWLHE

>gene\_1783|GeneMark.hmm|713\_aa|-|5778|7919 >NVVL01000088.1 Rickettsiales bacterium isolate NORP64 Contig\_source1382A\_27253, whole genome shotgun sequence MFMSLHNSLSDKYKLYTRYLEKITDIRFTIREIDVIACIIHNRGIQNISSLISARTVG AHYINIRAKLGYIPKDSIIDIEKSGKLQYIQQYLLHLVAQSLFEKYLCKIAAVVNRTEI ICNADYNNMNEQTKKLLSQLKYFLKLANITLTENKDTSGCMYNICVIDAPSTLENNHNLD TKEFNIALLLDENVDKSTLVNLEYIDFINDHYSAILSIAKIINKPELLQLTKKFKNEYQ TLQSSWNGSKVQNIASENNTTSFRVTKKLKLAVAAIAICLIVTLSVFLPKTQPNIVKLN EQLADFAMHFSSDNISTQAKRKENYRLLSEVEKIAPLFDNQQVYTYFSSKEVPYELMNC LYVLHALANQYTYQHNYKKARKLLEHIKIFAEQYVINKSSVGINFNELSKEEIELELNI IQDLPEIYTRIIYLLGRTYIYQGNVSVQYFKLASYLGSKPKTFEGYLSQRSGLVIRRE QEIDNDIENGDFQAQAVKKLHAAIKSMSELREDNTAYKINYHPGHTNQITIVPKNDSYSRVY CTEQIVKYYARLVMITSARQNEKYTNKISSFFIGNKSLSDLMDFAEKNIPQRSAAVYIS LGNTLLKLYEKHLSFATLKTAMSQKLIKITPKTDLDFIEKLFKLAASKSRNTHYTKADSYD GLARVVEIKLQQEEINVEQKLMLQNAIKDLRLKRDNINQKLTRMNQELRQHNL

>gene\_1784|GeneMark.hmm|654\_aa|-|2|1963 >NVVL01000089.1 Rickettsiales bacterium isolate NORP64 Contig\_source1382A\_28651, whole genome shotgun sequence MTKATGTAIGIDLGGTYSYCVGVWVWVWNEKVEIIPNDQGNRTTPSYVAFTNDERLIGDAAKNQ CARNPKNTIYDAKRLIGRKVGDKTQVSDMKLWPFKIEEGTAGKPQIVVQHKGEFKFHAEE EISSMVLKMKIEAESYLSKPIKNAVITVPAYFNDSQRQATKDAGAISGLNVLRIINEPT AAAIAYGLDKKGAQERNVLIFDLGGGTFDVSLTIDDGIFEVKATNGDTHLGGEDFDNRV VEFMEDFVKKSGIDIRGNDRALRLRTQCEKAKRILSAALSAPIECDALAEGEDYNASI SRAKFEELCIDLFRKCIAPVENVLKDSQLSKGQIHVDVVLVGGSTRIPKVQMQMIQDFNKG EPNRTINPDEAVAFGAAVQAAILTGEDDAQVKDLLLLDVTPLSLGIETAGGVMTTLIARN TTIPTKKGQFTTTYADNQPGEIKVYEGERMTMKNLILGKFSLDGIPPAPRGVPPQVEVT FDLANGIMNISAQDKGTQKEQKTIITNDKGRLSQEEIKMVDDAEKYKDADDLVKKKIE SKNALENYCFMSKNLNLNDEKDKDKFTEEDKTTITTEGCEEIKWLEANVEAEATEFEAKQK ELEGKFNPMKVVYQAAGGAPGGMPGGMPGGMPDMSGMGGMGGMGGMGGMGGMG

>gene\_1785|GeneMark.hmm|102\_aa|-|2082|2390 >NVVL01000089.1 Rickettsiales bacterium isolate NORP64 Contig\_source1382A\_28651, whole genome shotgun sequence LVFHNFTRLGDRISDVLKYLPVVPKVDKRTMTFANYSDYISFRHHVFVKDDHKTVKLKEIGPRFELKPYQISLGTVDMMVDAQKEWVLRPFMNTAKKRLAL

>gene\_1786|GeneMark.hmm|37\_aa|+|4122|4235 >NVVL01000089.1 Rickettsiales bacterium isolate NORP64 Contig\_source1382A\_28651, whole genome shotgun sequence MKMKCMKMIQHLQKIRKIRTLVIKKEEVNLLMKKLHQ

>gene\_1787|GeneMark.hmm|88\_aa|+|5409|5675 >NVVL01000089.1 Rickettsiales bacterium isolate NORP64 Contig\_source1382A\_28651, whole genome shotgun sequence MMLLSKARLKVMLPHQSRICKLKLQKPKVQRMIFKMLKKIKPMLLQLLKHLLKMLNL LKMNPKMNPKNLKNPRLSPKMSQRKM

>gene\_1788|GeneMark.hmm|48\_aa|+|5900|6046 >NVVL01000089.1 Rickettsiales bacterium isolate NORP64 Contig\_source1382A\_28651, whole genome shotgun sequence VDAVKETAKESDVEEGKGGSPAPASDKVPEASQDDIKADASGTGAAES



>gene\_1789|GeneMark.hmm|68\_aa|-|6194|6400 >NVVL01000089.1 Rickettsiales  
bacterium isolate NORP64 Contig\_source1382A\_28651, whole genome shotgun sequence  
MTPRDLDAAVPLFPVKAEEDESDVRETKLHRLGYLLKYFARNFLSDKIVIFLLVMITIA  
FIAIIVCS

>gene\_1790|GeneMark.hmm|75\_aa|-|217|444 >NVVL01000090.1 Rickettsiales  
bacterium isolate NORP64 Contig\_source1382A\_28652, whole genome shotgun sequence  
MKKDIHPAYKELTISIGKDKFVTASTLKSGEILMDVDFRKHPAWNKDGHAHSVNSQNKTVS  
DFNKKFGGLSFGMKK

>gene\_1791|GeneMark.hmm|100\_aa|-|441|743 >NVVL01000090.1 Rickettsiales  
bacterium isolate NORP64 Contig\_source1382A\_28652, whole genome shotgun sequence  
MSRKCELTGVGVQYGNNVSHSQRKTRRRFEPNVKSVVYSSELTGEKYRMKIVVKTMRITIE  
KFGGFDAFMLGAKDSLMSIKAKKVKREIAKKQTEKTEASA

>gene\_1792|GeneMark.hmm|468\_aa|-|852|2258 >NVVL01000090.1 Rickettsiales  
bacterium isolate NORP64 Contig\_source1382A\_28652, whole genome shotgun sequence  
MGIAFMSLPISKVAIMQNAIIPDHQDRFAEQFAHITYLINNDRLGDAIDSMLDLHYADLA  
DFLDNTPHKLYPVIFPAITSRLNPETIACLSANKQPAIESIGIAKSAKLIDDLIEDSI  
EIAEALSPDLKDALLAQLSPAMRQIIIEGFLYPEDTVGRALEKDFVSFGQHWTAGQAIDF  
IRRSDISADFHAAIIVSPRDKPVGITILLSTLLKSERNTPLEKIMSREFKSVDAHTALDDL  
AFIFKQYALTIVPVITRQGKLLGTISIDNMLYIVEDQAESELLHLAGIHNTDIFHSLRRTT  
VRHRFPWLFVNLIACLSLVINQFSGTIAKLVTLATIMPIVASMGGSAGTQAMTVTIRA  
LGSREITSSSTRVVTKEVLSALNGIILAFIGMMLTYLLFSDIYLSLVFAAAVVINFTL  
AGLFGSSIPIMLNNMEIDPAAASGVFLTCTDAIGFFSFLGLAYFFLV

>gene\_1793|GeneMark.hmm|277\_aa|-|2594|3427 >NVVL01000090.1 Rickettsiales  
bacterium isolate NORP64 Contig\_source1382A\_28652, whole genome shotgun sequence  
MSNKQTNTIILALMSFVLLVTSVFTGYRYFKWRLSYQRLAHEYSYRGEVIHPKTTQEII  
DTTFSGDWMVQEIQMLKDTTELFKFEIKYAVESGTALGVIRHGGFIPWDDDDVDIMLMQ  
EDEHKLIELAPELEKLGKILWDEDVYRIFLPNKLVHPMSYTLPAIDINIMFENKEKNT  
VEMVNWNMRKLYSKVWFPRDKFFPLKKYKFGPIEVYGPSDIEWHVKHYYGKNALKEIRMD  
PKIWLKGKHSNIITVPSVPDVFVKPALPKKPLLDNVN

>gene\_1794|GeneMark.hmm|291\_aa|-|3467|4342 >NVVL01000090.1 Rickettsiales  
bacterium isolate NORP64 Contig\_source1382A\_28652, whole genome shotgun sequence  
LYCLVIKTTTKYCIKMLKQTNIIIRILSVVSFLLLVGCIISGYHYFKWKSLSHQATIQEYRY  
RDKLAYPKTNQEIIDVTFNSDKMVQELYQMLKDTTELFDFKFEMSYAVEGDTALGIVRHGG  
LLPWGNDAAIMLMQKDESKLISITSELEKLGKIIWDKDLYRIFFKSKKGYVGRRYTLPV  
INVSIMFENKKKNIVEPLNWKIKKALPTNWLPKDKFFPLKKYKFGAIEVYGANNIEWYVG  
HRYGKSVLKEKIEPKFWLGKHSNVITVPSAPDVFFKPALPKEALLDRVQ

>gene\_1795|GeneMark.hmm|168\_aa|+|4439|4945 >NVVL01000090.1 Rickettsiales  
bacterium isolate NORP64 Contig\_source1382A\_28652, whole genome shotgun sequence  
MPQKTIGIYPGTFDPITNGHADIIARASKITDELVLAISESTVKNPMSIEERCEMARIY

LDKYNIASNVKVMPEFGLLAKFASSVGAQFIVRGLRAVSDFEYEFQMACMNRMDSTIET  
IFLPASEKNQFISSRLVKEIASLGGNVSEFVIPEIEEKLIKYYNISNE

>gene\_1796|GeneMark.hmm|365\_aa|+|4938|6035 >NVVL01000090.1 Rickettsiales  
bacterium isolate NORP64 Contig\_source1382A\_28652, whole genome shotgun sequence  
MNNAKCSLQINLQTIKENYIALRKLKLCIGSEVGAALKANSYGLGASRIAPVLQESGCKHFF  
VATCEEGVDLRQTLRGDANIYVLNGVFQNELEYFINHNLTPVLNNPEQVEIWQHYYAARHG  
RRLPCFIHIDTGMHRLGFSSAEASELELDLLRNLDILCVMSHLASAEVDNPFNKQTLE  
RFTQRSKAFGDIKRLANSSGIFLGRDYHFNLRPGAALYGINPAPYLENLTLPVKNPKLS  
APIIQLRDLPPGESVGYNSTHTNRRGDSCSIATIAIGYADGLHRALSNGVLYINGFEAP  
IIGRVSMDLTAIDLSNIPKNDVFLGQMVEVIGENSSPDELAKFCGTNGYEILATLGKRFK  
KIYTG

>gene\_1797|GeneMark.hmm|241\_aa|+|6129|6851 >NVVL01000090.1 Rickettsiales  
bacterium isolate NORP64 Contig\_source1382A\_28652, whole genome shotgun sequence  
MLSSVRYIGNRSINGAQRGLVLTMFIAEVMAGMAKRPLYLKLIGRQLITIGYFSLPIVAM  
TALFSGAVLALQSYTGFSRFSAESSIATVVVLSITRELGPVLAGLMVAGRVGASIAAEIA  
TMRVTEQIDALYTLSTNPIKYLVPVRIA AAVVTLPCVLIGDVIGVMGGYLVSVYKLGFN  
GTNYLINTATYLESIDVISGLVKA AVFGFIISIMSCYHGYHSGKGARGVGAETTGA VVSS  
S

>gene\_1798|GeneMark.hmm|90\_aa|+|147|419 >NVVL01000091.1 Rickettsiales  
bacterium isolate NORP64 Contig\_source1382A\_28992, whole genome shotgun sequence  
MTALSINLPDSLTKESTRFAKELGMSRTEFIKRAIHELADLKKKQEEAKIINSFAAMKK  
SKTYIKQTIQTIEEFEDILPSEQVQWWKKK

>gene\_1799|GeneMark.hmm|430\_aa|+|871|2163 >NVVL01000091.1 Rickettsiales  
bacterium isolate NORP64 Contig\_source1382A\_28992, whole genome shotgun sequence  
MIITKRKFFIVWLLGFMSGFTLMISGNTLNFWLAKENIDLQITIGVFALISIPYAINFTWA  
PIFDTVKLPILNKLFGKRLSWLLLIQILLSSAIYVMSTLSPTYALELLAICGFVIAFLAS  
AQDTILGAMRTEMVDKNRQGEIAGMYVFGYRIGMLASSSGAIYISQYVHWGLVYELFSVI  
TIAFPLILLFTNDLLPIKQEFTPKVEDPNTKPALQKSALHRKMIDFFSEILKPVGKPKY  
IIFVLIFLALYRLPDNFISMMINPFLHIGYDEFEISTAGKLFGTSAAMIGGFLASYIMK  
KKNLYDSLLIFGSVHAIHLFFVLQELYGKNLYMLFVVIGFEGVSGGMSMAAYIAFIASL  
CQGKFRATQYSFFSSMMGFSSRSIFPALSGYIVSSFGWTVFYLFTTIATLPSLMMILYLEK  
LQKQNSSEK

>gene\_1800|GeneMark.hmm|459\_aa|+|2160|3539 >NVVL01000091.1 Rickettsiales  
bacterium isolate NORP64 Contig\_source1382A\_28992, whole genome shotgun sequence  
MIDIIVFSYLMILLFIGVYQRSKLAGFAGFARIGGKLQKNRLLIVATIFVSSIGGGTTF  
GISEKAFAENIAYSGLFFAIPVDILIAIYIIPRLAKHYGAETIGDIMEVYVGKPGRYIA  
GFSAILVSVGLVAAQISVSGRIFEYILQIEYVWSVVFYSYAIIVYTTIGGFRSVLFANLL  
QFFAILIAIPMISIFGIYQIGLDNFTQLVPASKVSFFDNPDLLSTTIAATLGFVMMNMF  
TFIQRALINKDAKATSRAIYKSSIIAIFLVFITLNGLIAFIKYPDLEPSLALPYLIDHM  
IPTGLQGLVVVGLLA VMSTADSDLNITSITIVKDFLSPIFSVQNQDKMLMLARVINIIV  
GSFAIIIALCFTRVVDLVIFIAGFWSPVILVPLVLALFGIVISKRGMICSCFSGVASFIL

WENYCASEHCFKGVFVGVMMHLFVFSIWRIYTKRNSVIS

>gene\_1801|GeneMark.hmm|175\_aa|-|3532|4059 >NVVL01000091.1 Rickettsiales  
bacterium isolate NORP64 Contig\_source1382A\_28992, whole genome shotgun sequence  
MSGSDLELNKMAAAILVASLIAMIVGVVANALYKPKLEVAQRGYQVEVAEEGTVAEATKA  
SAEIVDIKILMASANA EAGRKIFKKCVSCHTVNKNKSNKVGPNLWNIVNAQKGEKPGFAY  
SKAMLASGGSWDEENMFAFLTKPSKYLPGTKMSFRGIKPTQVADVIAYLQKEAS

>gene\_1802|GeneMark.hmm|341\_aa|-|4091|5116 >NVVL01000091.1 Rickettsiales  
bacterium isolate NORP64 Contig\_source1382A\_28992, whole genome shotgun sequence  
LSIKILGLESSCDDSA AAIIDSKLNILSNIVISQNEHELKFGVVPEIAARSHLANLETA  
LQRSLTEASLT LGDIDVIAATAGPGLIGGVIVGSMYKALASVLNKPFI AVNHLEGHALT  
ARLTDKIEFPYLL LASGGHCQFVAVMGMGKYKILGQTLDDAIGEA FDKVAKMMDLGFPG  
GPAVEKMAKDGDSARFDFRPLFSRQNC DMSFSLKTA VRLQIEKLLPLKKQDIHDIAAS  
FQQTVCDIITRKTEYAIREYEKLT SKQIVISGGVAANNIR SALT ELSASLGYNFVAPP  
TKLCTDNAAMI AFTGLERFKAGTINGMDFKPRARWSLEEVD

>gene\_1803|GeneMark.hmm|394\_aa|-|5125|6309 >NVVL01000091.1 Rickettsiales  
bacterium isolate NORP64 Contig\_source1382A\_28992, whole genome shotgun sequence  
MKKYSLFIAIILNVSLSYADSVLRKNVNDATSEYLS THFMNGVYMFCDENGLITQGAKG  
FYSLENKKLSTSQLMPIASATKTMTAASIMKLRDKLLNMKDTVAKHLSAESGIWKEGK  
LADWASKITLHNL LTHRSGLPEYFMKVKVDLTKTHDEINKDILHFLASNELKFKPEAKYQ  
YSNSNYVLLGLIIEQVSGQKLS EFMQQEIFTPLDMKDTKIPTLSEALEHQTTPESTIYPS  
RYFVTPTGKKPMFNKAMSKYPMMPFS DGGVTSTTKDMTKWLKALHSGKVVSADSYKLMKT  
RHYEIKHRTGVKNYMGYGYMIAELKNGDIAYHHPGNAVAIRSESGYIPAKNLYFTVLSNV  
MDYIPPQMKGKIDKTKSVNQLDIRYFMQCIFNTI

>gene\_1804|GeneMark.hmm|240\_aa|-|2|721 >NVVL01000092.1 Rickettsiales  
bacterium isolate NORP64 Contig\_source1382A\_29265, whole genome shotgun sequence  
MCDFCVSGKIETYEQLVSGSAEKKEVFKLFD RHIIHFDNVLDLCVIDDIKNPTIRDVITKL  
YPEGWKDIFNDNLYELKTICDYISSEAKETQIFPHFEDVFKVFD MCSPEDIKVIIGQDP  
YPRLGKLG LPLGTGLSFSVRVGENIPRSL SNIYNELDRSIDSFVKPKHGNLENWVNQGVF  
LLNKSLTVEN GKVN SHKRVWNNFTSNI IKYLSAFDEDIYVLWGKDAQEMNKTYTKGVIF

>gene\_1805|GeneMark.hmm|536\_aa|-|750|2360 >NVVL01000092.1 Rickettsiales  
bacterium isolate NORP64 Contig\_source1382A\_29265, whole genome shotgun sequence  
MDVLECNVNKITQMVGIPVVIKPVDAKRG NVLFIGTNDGHIFVYDESSKKKTL LLDLRNVI  
KTPSFCKMGLLGLAFHEDFDKNGK FYVHYS LDTSNGISNGIDVEDVDVNNLSSLFQEWSD  
INEYNHIDVVEEYIQDCFCDNPKCVAEKS TLLKIRQPFENNGSDSLLYKEGKLLTLG  
DGGSSYDPFNLSQNNNSLHGKIISIDETIVWDET VSIGNIYELDETQCDKV TILSKGIQS  
PSSLDILDDMMYLV DNGKVVNELNVFKKFGN NFGWRPFEGILPTLHMSNIKNISPTYNSG  
INPVDFKVDEVVWDVECDKGGVIHLDIAPGDY LHFKSSNPCNVIETFSNYENKKDPIIDS  
EISIINESILLECTGDFYFKSFVPGGDNTSLSVSVRNDILRKRKVNSIKLENYKDKLKSS  
KEVPIFTVAYYNESLSLAPKLKQQCDTYILP SENRISSGKYYKGELGHIKDKFVFDLLK  
GIYTFSLCEPHIQKINVKIEGDFYTS LGVNDKRD TLYIGTSTILDSKAIGTVYSLK

>gene\_1806|GeneMark.hmm|507\_aa|-|2366|3889 >NVVL01000092.1 Rickettsiales bacterium isolate NORP64 Contig\_source1382A\_29265, whole genome shotgun sequence  
MDRIGIVFVICTFIIISIFYIKIFSKRHLGKIVVQMGKCKSNSLNCRDLGTRTITSTCVS  
DNQNDTCGNGMFVSDTITTSETCEPTCRKSFWDHEVGKCTVKDNLGCVDLGTVGNRTR  
NVECVRGDDFGINTCTSLELLEHTGPLGLGKIKIKLYNIGDVVSMEEECTNYTNKICGK  
WKTNKNNIISPCNLGKQLSVHKNCITGVSKPFDSLVEGYVEEDMLCTKTIGNVEVIRGND  
VCHLVKELISCSSTGTTDPVDIRNGTLPLDFTPTICRPTDDIPKCVRVCRMYPNKNINVGIF  
SDITGAMFTLRKIQGYFTAENLPIDVDGKLEDTKIVLIDDGTGISSLCNSKSLKYNTEY  
NTSIMFCLGVRRYDGNITKAQISCIIGGSYVGVLSVNKSNEIWEQAYNIYGAPGSTTTD  
AYMFTIKNYVKENDLGSNHMGFGNNSTYKGMCGIDLKSNTGGNLYIKDVRGKAHELNHIV  
ALIINIESVLNRSDIFTECNLLYKNNN

>gene\_1807|GeneMark.hmm|78\_aa|-|3946|4182 >NVVL01000092.1 Rickettsiales bacterium isolate NORP64 Contig\_source1382A\_29265, whole genome shotgun sequence  
MRGWKISHVLYFLAIIAALVGVILGVGVGIKNGSDLSENDTHNITRANLFFLASVAIGII  
AMVQMSYDKHGHRLVTA

>gene\_1808|GeneMark.hmm|169\_aa|-|4204|4713 >NVVL01000092.1 Rickettsiales bacterium isolate NORP64 Contig\_source1382A\_29265, whole genome shotgun sequence  
MGACNIKSAFQSEQSRVTMIYENAVTLDTTSAYNIARSDIESILNSTSYTNLEVPLGDYP  
TGMDRLVVVFPVVDVSVVQKIVTIQILYKCDTTNTHHIFHMTLLPGPNHEAITLIPHRNS  
FEETKADDNLHDHSTLNTVSTLKRVDVNTCYRPPKCKKYCSGCHKYHSNK

>gene\_1809|GeneMark.hmm|205\_aa|-|4725|5342 >NVVL01000092.1 Rickettsiales bacterium isolate NORP64 Contig\_source1382A\_29265, whole genome shotgun sequence  
VKFGTTGKRKFRKTRKMTHTNIKMRKYINIKWEREKQYRAGVLPYYKSEKGIGSQKEVIF  
IMGVDSMYGNYTDFGGAKKLGRNNKRIEKSNETAFRELEEETLGCIRKDLDFNALVVS  
SDQMLIVLAEVKISDIQDRNNTKKIKHIFNSFDLKLANEGSPEVSSLCEIPKDLFIYSML  
SDKSTVYPPVKNLLSGKITHISKIK

>gene\_1810|GeneMark.hmm|58\_aa|-|5344|5520 >NVVL01000092.1 Rickettsiales bacterium isolate NORP64 Contig\_source1382A\_29265, whole genome shotgun sequence  
MKKITSVKEATSQETLFYILLGENYARIQGVPEEIDTRSIGATLWHFVIKKQFEKNS

>gene\_1811|GeneMark.hmm|133\_aa|+|5873|6274 >NVVL01000092.1 Rickettsiales bacterium isolate NORP64 Contig\_source1382A\_29265, whole genome shotgun sequence  
MPNEFKEMFGDSALVEWTSYGDCGPDVPLLVAEAGSDVAFGYKCGTGLTNPVLLSDCTIK  
VSNVSGKFAIKYLADFAGWVGMIIAKCKGCDGVSTSRFFTLGDPHTKHNRDFLCKKDS  
PYGTELDLPIVVS

>gene\_1812|GeneMark.hmm|126\_aa|-|252|632 >NVVL01000093.1 Rickettsiales bacterium isolate NORP64 Contig\_source1382A\_29274, whole genome shotgun sequence  
MIKHIVGMSIYQCIIFTITLAGEYIIPEDPDYIVKNLDNPGFVHPGRLYKWNGDDLYNV  
LLPIHGPSRNLTMVFNTFVFLQIFNMINARKINDEINPFADIFKNKMFIGIWLIIIFLLQI  
VLTQFT

>gene\_1813|GeneMark.hmm|136\_aa|-|663|1073 >NVVL01000093.1 Rickettsiales  
bacterium isolate NORP64 Contig\_source1382A\_29274, whole genome shotgun sequence  
MVTGLKQFGDTVAVTGDGTNDAPALKKADVGFAMGIAGTDVAKHAADIILLDDNFASIVR  
AVVWGRNIYDNIRRFQLQFLTVNVVALVVSFIGAAIMRESPLQAIQLLWVNLIMDSLASL  
ALATEPPKDTLLDRPP

>gene\_1814|GeneMark.hmm|44\_aa|-|1176|1310 >NVVL01000093.1 Rickettsiales  
bacterium isolate NORP64 Contig\_source1382A\_29274, whole genome shotgun sequence  
MVTGDNKITALIAIKECKIVEEGDNMEMAVMEGKDFYEVGGIV

>gene\_1815|GeneMark.hmm|49\_aa|-|1329|1478 >NVVL01000093.1 Rickettsiales  
bacterium isolate NORP64 Contig\_source1382A\_29274, whole genome shotgun sequence  
MGEGGATHEDDDVEGVQKVVEKDGLVCLALLGIRDIIRKEVPGAVAKCR

>gene\_1816|GeneMark.hmm|132\_aa|-|1479|1877 >NVVL01000093.1 Rickettsiales  
bacterium isolate NORP64 Contig\_source1382A\_29274, whole genome shotgun sequence  
MFESISCNTVGTVDSSATEKAMLMKMLKFSVNVEDSRATHLGESFVRFPFPSKRKRMS  
VANSISEQRYGYDKRLHIKGA AEIILACCSHYIDDNGAEQEMTASIKDGV LGVIEFFGTQ  
ALRCICVAYKDI

>gene\_1817|GeneMark.hmm|119\_aa|-|1956|2315 >NVVL01000093.1 Rickettsiales  
bacterium isolate NORP64 Contig\_source1382A\_29274, whole genome shotgun sequence  
MLFAALTVLVLFIRFFIETDYDFGDKFGTYLGDWFGFLIIGITIIIVAVPEGLPLAVMI  
SLAYSVRKMLAEKNFVKKLASCEIMGGANNICSDKTGTLTMNEMSVTNLWNGATQGTPD

>gene\_1818|GeneMark.hmm|72\_aa|-|2457|2675 >NVVL01000093.1 Rickettsiales  
bacterium isolate NORP64 Contig\_source1382A\_29274, whole genome shotgun sequence  
MPVDGVCSRGRDIMTDESAMTGESVELKKHTLDGCFRRKEERLKELEYSKAAQLDSHSF  
PSPIIISGTQVQ

>gene\_1819|GeneMark.hmm|75\_aa|-|2943|3170 >NVVL01000093.1 Rickettsiales  
bacterium isolate NORP64 Contig\_source1382A\_29274, whole genome shotgun sequence  
MQLTSKRGMAIMATTISLLHREPVRTKDV LHIAFCKFFCAAMNDLMLKVLIVCAIISIV  
SMIFEADHRSTGKFE

>gene\_1820|GeneMark.hmm|54\_aa|+|4633|4797 >NVVL01000093.1 Rickettsiales  
bacterium isolate NORP64 Contig\_source1382A\_29274, whole genome shotgun sequence  
MQELEKTHQQFDSSQVASVKTSEISSPTVDSGVVVPKIVNSNFHVPEPKKADTLGS

>gene\_1821|GeneMark.hmm|40\_aa|+|5542|5664 >NVVL01000093.1 Rickettsiales  
bacterium isolate NORP64 Contig\_source1382A\_29274, whole genome shotgun sequence  
MGDGVACRGGVMAEPEIFEFTITKADKMMIIASDGVWEFL

>gene\_1822|GeneMark.hmm|46\_aa|+|5713|5853 >NVVL01000093.1 Rickettsiales  
bacterium isolate NORP64 Contig\_source1382A\_29274, whole genome shotgun sequence  
VYPFFEKRNAEGAAEALVRESFKAWRREEDVIDDITCIVIFLDVKM

>gene\_1823|GeneMark.hmm|967\_aa|+|329|3232 >NVVL01000094.1 Rickettsiales bacterium isolate NORP64 Contig\_source1382A\_29280, whole genome shotgun sequence  
MFGAQISLDMIIVIGFLVLTIVGMGHGKNVKTIKDYALGGRNFSTAALVATIVATWASG  
SSFFITMSMTYSDGLYDTFAVIGGGISFLIEAFFIIPRMGEFLGKVSIAEAMGDLYGKKV  
RVITAIAGTIGAAGIIAVQFKVFGNIFSYFLHIPAYVAIVAAGFIATLYSAFGGIRAVTF  
TDILQFLAFGIIIPVVGFIWNAFYAEGLSFDQAITDPKFNLGILLDTSNPGFVGMIFMF  
CYFCVPTMSAPAFQRVAIGRDVAQVKKAFIAGLIFIVIQVSAWIPFLIYSINPSLETS  
HLLGYIVDTYAYPGLKGLIIVAIILSMSTADSRINAASVLTNDICKVFAKLRRELLI  
TRSFALLGAISIVLALIEDLIGVVVFANSFYPIVTPPFLTVFGFRSTSKSVLIGMA  
AGFATVIIWKMLPISFATISQKMVGVLFAMLVNVIFLIASHYLLRQEGGWVGVKDTSYID  
KQRALRKKKWAVFMQKFQNFRLVKAITTAPLPSETRCVMTGLYFIFFTVTIAYSTDIDTL  
KDNGLNLVLIYQIMIATGTVMAYPIWPMNVKQKTKNMIIRIFYPIAMFYMMVFFSTFFV  
LLSDTNTLHYMIFAANIITLIVVMSWQAGTVMVIVGAYLAIQFYKYMEIEHLDSSIGSP  
QFILIYSIVFIGSALMMFFKPKQEDLEQREREISMLSGKVGSLKTKIGTLDNELLGMSEQ  
VTHYSQRASDQALEIERLGAISQKILNNVNHRLPVGVMNFAEMMRDGLGKLPDKQLR  
MISDEVYDNSNRLSTMILNMLDLATLDANKIQLQKREVNFSDLVVERLQICRKIYVGEKL  
LKFKLNIDPMVVLSDVNYIRQMVDNLIINSINFSKIGLITIIVNRDGGKAFNFIQDQGI  
GIPITEIYDVFTPFKMGSNTEGKAEGRGVGLALCKAAIEAHDGTIQVESRGVGVVFRVKL  
PFTQEQR

>gene\_1824|GeneMark.hmm|135\_aa|-|3253|3660 >NVVL01000094.1 Rickettsiales bacterium isolate NORP64 Contig\_source1382A\_29280, whole genome shotgun sequence  
MGVVIDTSVLIAAERQEIDFNKWQKYDAAYISSITITELLIGVHRAKSSKIRVKRSAFVE  
HIISQITALVFGEEEARVYAQILDDLYKKGITLGTHDMIIGASAIVNGYPVLTMNEKDFK  
RIPGLEVLSSLSKEIR

>gene\_1825|GeneMark.hmm|92\_aa|-|3651|3929 >NVVL01000094.1 Rickettsiales bacterium isolate NORP64 Contig\_source1382A\_29280, whole genome shotgun sequence  
MTKLITVTDMIRSFSDIVARVYYKGEIFDIKKGHNIVARLSPAKTRATIGISELNNFFKE  
APHLSDDAEDFENTLKETRLLKDSGASMGWE

>gene\_1826|GeneMark.hmm|649\_aa|-|4044|5993 >NVVL01000094.1 Rickettsiales bacterium isolate NORP64 Contig\_source1382A\_29280, whole genome shotgun sequence  
MHQIIKVLLPQVCLFPLDYSSDTHNIGDLIVVPFRNKELTGIVWEIGCADSGKALKNIC  
SPPLFPASINPPMIELITRASSYYLADLGTIAKLVLPVNINESPLKIKTHDEQASTPRAL  
PPLTPSQEALGIVKASILPVVIKGVGTGSGKTELYFHAIQEQLALGKQALIMLPEIALGS  
QIIARFTERFGFPAIWNSKVTKAQKKQILRGIISGSVKIVIGARSSLFLPYKELGMIVV  
DEEHDSSYKQGEGLYHARDMAVLRGAVEGCKILLGSATPSIESLYNVQIGKYQLATLND  
RWGAFPLPDVKIVDMRNEISLGHNCYLSEEATLAIGKNLAAKNQTLIFLNRRGYAPLMLCK  
ACGYRFDCKSCSASMVVHKSSGRMECHHCGAVSRVHDKPCDCQEENTLTLGAGIERVAE  
EVSNLFPNSNTSLVSKEEFSCLEKMKELLSRMESGEIDILIGTQIVTKGYHFPNLTLVVV  
ANSDIGFMGGDLRTAERTYQLLHQVGGGRAGRADKKGSVLLQTYYPEHKVITAIASGTEDE  
FIRQEIASREQAKVPPFAKMAAITITGKNPARTLIAAKDFVAKAPKSTAQILGPAAEAML  
KLSGRYRYRILVIADKKFNLQKYLTLWREHAALRSTYQLKIDIDPQSTI

>gene\_1827|GeneMark.hmm|118\_aa|-|6037|6393 >NVVL01000094.1 Rickettsiales  
bacterium isolate NORP64 Contig\_source1382A\_29280, whole genome shotgun sequence  
MKNSEVKEDFKSPYMARVAKRLRVLMTDEERIEYHKYLKESAVQEDILHAATERGREG  
VEEGIEKGREGLSEGAKLAKIEVVKTMLMQGLDVNLISQATKLSIDEVKALRSHKVT

>gene\_1828|GeneMark.hmm|27\_aa|-|3|83 >NVVL01000095.1 Rickettsiales  
bacterium isolate NORP64 Contig\_source1382A\_29500, whole genome shotgun sequence  
MDLATYYLRIQMINLFYDNNKLGFWGF

>gene\_1829|GeneMark.hmm|213\_aa|-|250|891 >NVVL01000095.1 Rickettsiales  
bacterium isolate NORP64 Contig\_source1382A\_29500, whole genome shotgun sequence  
MPTAGSASKYEAVAGGGDKVTVEVADGDKDDKGEKDAEGADTKKGDDKGEETPDEKKLKK  
SETNHYGGILDETEKEVTVVGPGACNAFLWKHRVCNPFATADPIFRRFLRAIFFGGQFWF  
IFCVSGLFVWVNDVFSSENEGVPMPLEGGFKFLIVLIIIFVLSRFFLWMVEGLNRLDAVSF  
LMRGLVTFVTITIGKSCYFNLKVFATMESFTA

>gene\_1830|GeneMark.hmm|168\_aa|-|1174|1680 >NVVL01000095.1 Rickettsiales  
bacterium isolate NORP64 Contig\_source1382A\_29500, whole genome shotgun sequence  
MSQIAQSSCANAELEVEGSSCTAFESTSRTVSSFLDRSTVGETLINVKSPNLVAIADSGP  
IENARRNLEGEQLQVILSENSIPAECDSPIITVIAVGNVISLLDKTLFDIEIYGKNYGP  
KGVGVQASLSCIEFENSQYVITPSSIVDVTTIKLATLPTIDNYYTASAA

>gene\_1831|GeneMark.hmm|63\_aa|-|2232|2423 >NVVL01000095.1 Rickettsiales  
bacterium isolate NORP64 Contig\_source1382A\_29500, whole genome shotgun sequence  
LLEILQEEQHKFTLHHLQQLTLVSAQSQENPGKQDSRLMLDLSQRLIHVFMGIIQNLVS  
KII

>gene\_1832|GeneMark.hmm|102\_aa|-|3268|3576 >NVVL01000095.1 Rickettsiales  
bacterium isolate NORP64 Contig\_source1382A\_29500, whole genome shotgun sequence  
MTELNDVTLTDNINTVLGNAANISSVSLDSGISTSLSGRDQVFGAYTVDYLGRKVLASKL  
VTFSNNSPVIYIDAAYFVSNTQDFTLTPRVTPSECSGAKTQ

>gene\_1833|GeneMark.hmm|53\_aa|-|4233|4394 >NVVL01000095.1 Rickettsiales  
bacterium isolate NORP64 Contig\_source1382A\_29500, whole genome shotgun sequence  
VKFATQITTWDKMASVMQHVLVITMVVYRLQDLSIVQTVQANAQHASMLVVHP

>gene\_1834|GeneMark.hmm|32\_aa|-|4416|4514 >NVVL01000095.1 Rickettsiales  
bacterium isolate NORP64 Contig\_source1382A\_29500, whole genome shotgun sequence  
MKPIQLPRKLALHALPIPTSQNIQAQLGAQAIV

>gene\_1835|GeneMark.hmm|135\_aa|-|4935|5342 >NVVL01000095.1 Rickettsiales  
bacterium isolate NORP64 Contig\_source1382A\_29500, whole genome shotgun sequence  
LLRLEHAMLTIQAQMAFMQMVKTVKPVLPVQHVKPVLPVLAQLNAQNALRNIQMLTEIVFLKSN  
AATFHKNSPIEFVLISPHVAPTCKLIYQGTVYLIHVVTMDGSKVLIFVRFVTLHVDNVL  
DQTLTNALAVTTTTP

>gene\_1836|GeneMark.hmm|58\_aa|-|5343|5519 >NVVL01000095.1 Rickettsiales  
bacterium isolate NORP64 Contig\_source1382A\_29500, whole genome shotgun sequence  
VIFAQMDILDELTEPVPLLAHQELMTLTVKYVKDVMMAIVKLARKTQLSAFSAVMLTNS

>gene\_1837|GeneMark.hmm|27\_aa|-|5676|5759 >NVVL01000095.1 Rickettsiales  
bacterium isolate NORP64 Contig\_source1382A\_29500, whole genome shotgun sequence  
MVVQLVLEEGTVNALLAPLYGTLQJSY

>gene\_1838|GeneMark.hmm|63\_aa|+|1|192 >NVVL01000096.1 Rickettsiales  
bacterium isolate NORP64 Contig\_source1382A\_29577, whole genome shotgun sequence  
VLLPSLFSLLFYATFSLNVARYQMTALPGFSIAFAFFAVWVRGKAHNWSSGRRWTSAKEK  
KNA

>gene\_1839|GeneMark.hmm|332\_aa|+|185|1183 >NVVL01000096.1 Rickettsiales  
bacterium isolate NORP64 Contig\_source1382A\_29577, whole genome shotgun sequence  
MPNDNMIQPTAAYNHARIAILLPCYNEGKAISHVIASFRSIVPSAQIVVIDNASNDDTAE  
KAMAADAIVIREDLPGKGNVRRGFSEVEADIYVMADGDGTYDARALPQLINKLVEDRLD  
MVGTRAKEKEQAAYRSGHRIGNRLFNTVFAKLFGRTRFDIFSGYRVFSRRFVKTFPAIST  
GFEIETEISVHAIMLRAPVAEIPTSYGARHEGTESKLRTYRDGIRLSKILLFTATHKPF  
VFYGLIAASLAILSVLLSIPLILEFLETGAVYRLPTAVLTVGIMISAILSFTGAILSNI  
GIGQWEVKRLSYLMHTDRLDAIRAALTVLREK

>gene\_1840|GeneMark.hmm|132\_aa|+|1180|1578 >NVVL01000096.1 Rickettsiales  
bacterium isolate NORP64 Contig\_source1382A\_29577, whole genome shotgun sequence  
MINRSLIDKALRFAIVGSLGFLTDAGLLWVATNKFGLDPYSARLVSFSTALLTTWLLNSQ  
FTFKSPKRRTKSQFTGYVVVQVTSFFLNALYSLLVWQGVATPLVSLFFAAIISMFYST  
TVNIWVFGDRRQ

>gene\_1841|GeneMark.hmm|102\_aa|-|1624|1932 >NVVL01000096.1 Rickettsiales  
bacterium isolate NORP64 Contig\_source1382A\_29577, whole genome shotgun sequence  
LGPLNSAHRISAVQSIIGEELMTEVGGIAADQLASYVERIERLEEEKANLMADIKEVYGE  
AKALGYDVKILRQIIRLRKMEDHERTEQEEILEVYKRALGMS

>gene\_1842|GeneMark.hmm|389\_aa|-|2248|3417 >NVVL01000096.1 Rickettsiales  
bacterium isolate NORP64 Contig\_source1382A\_29577, whole genome shotgun sequence  
LAGASAREPGFSIGIEEFWLVDRETRDLAKDPPAEFLKDAKAKLGDQVSSEFMRCQVET  
GSQVCNSALEAREQLIHMRSTLSEVAKYDMALLAASTHPFAQWDDQKHTDGERYNTIAR  
DLRTVVDRLICGMHVHVGIEDDDLRIELMAQASYFLPHLLALTSSPFWRGKETGLQTF  
RLSVFDNLPRTGLPEVFGSWAEYRRHVDMLINAGVIEDGTKLWWDLRPSDRWPTLEMRIA  
DVCTDLEDAVCVASITRCLMRMLYRLRRNNQRWRIYANMLVRENRRACRYGSDPGEKAG  
LIDFGRGEIVSYADLLEEILELIRPDAEFFGCVDEVEHARTIVKRGTSARRQREIYDGA  
ELGATPKDALVAVADVLIERTDPHARSET

>gene\_1843|GeneMark.hmm|258\_aa|-|3419|4195 >NVVL01000096.1 Rickettsiales  
bacterium isolate NORP64 Contig\_source1382A\_29577, whole genome shotgun sequence  
LGHDDPAPFEILNENGGHSLFVCDHASREVPKSLGTLGLPDEERKRHIGWDIGARKVTE



ILVERFDCPAVLGGYSRLVIDCNRQLWDPTGMPEIADQTVVPGNKNVSPSEHMKRIREIF  
LPYHWAIEEQIATFHAKIAPALIAIHSFTPVFQGFERPWEIGVLWDQDDRIPVPLETL  
RAQNPDLTIGDNEPYSQHLADYTIDHHGEAAGLPCVSIERQDLIDTDEGCEKWAKILG  
DAFVDILADPNLYKIRRD

>gene\_1844|GeneMark.hmm|249\_aa|+|4515|5264 >NVVL01000096.1 Rickettsiales  
bacterium isolate NORP64 Contig\_source1382A\_29577, whole genome shotgun sequence  
MPSAKTLQAQDDPETRRPKRVADQVADQILEKISDGIFLPGDRLPGERQLAESMSVSRVS  
VRAALQKCLKTRGYLRAVQGGGTEILSSTGIDMDTAMTDLVRDSISNLRDLQEIRCTLETW  
AARRAAINASDEDIKLLRMAFRQAHPRRAAKHRADDHRLHMMIGRATGSIIYYHVMKM  
LHDVLAALTEIRFNGMAGPTFDRMVQEHHRAIEAIAAHPDAAEKAMSDHLQAVIDFF  
KSASDKQAT

>gene\_1845|GeneMark.hmm|300\_aa|+|5308|6207 >NVVL01000096.1 Rickettsiales  
bacterium isolate NORP64 Contig\_source1382A\_29577, whole genome shotgun sequence  
MTTSREKLLALMDAALKAADPGVQIPRNLPPEPKGTIVIGAGKASANMARAFEKAWKGD  
VEGLVVTRYGHAVECDQIEIVEASHVPDAAGEKAAKRILEIVSDAGPEDLVVCMISGGG  
SALLALPGPGLTLEDKQAIKALLRSGATISEMNCVRKHLSAIKGGRLAKACAPARMVTY  
LVSDVPGDDPAIIASGPTVSDPTTGQDALDIIRHYQIEIPQAAKDLLQSAEDETIPDDP  
CFEGHETIMLARPQDSLEAAASVARDMGLNAVILGDAIEGEAREVAIVHAGIAHQVANHG

>gene\_1846|GeneMark.hmm|757\_aa|-|114|2387 >NVVL01000097.1 Rickettsiales  
bacterium isolate NORP64 Contig\_source1382A\_29601, whole genome shotgun sequence  
MSLPIPRKLTDEITEIVNGLPESPGLTDAAEKSREGVKLDLIFQLKDIKIVEEAIDDLK  
NIIYTKYKKSIVKPGAPVGMIASSALIAHLTQATLNSFHSSGSVGEELSGIGAMMALMSG  
SSNKKGIGITISMKNKYLNISDILALRKDFVELNVSDITMEMLILSKQELMESEPKNYDL  
YRSVIGKIPNSSNGLRLVLDTKILYNNRISLDSKAILSKVNTGMAQLIECVYFPTKVG  
IIDYIPDSKISLSTIHSSACKDPVLFHSMILLPIIGDIGIMGIKGIKSMGPVSFDIWS  
LILGEKKISNGETLLALDRNKMFHMGVSKNHVNRMLREFGMVIVERKVKIGLTMVNTIKS  
DEYMVVKLTEKRSGLTSPKIIHHYRDEDELEEAFFEDKLSGVIEPNTRMEETPYQKV  
SKYWYARTNGTNLNEIMRMDSDVDPDHTHSDVNEIINKLGICAAKNFIFLRTVEVASLGG  
ANVDPKHILADYMTSKGNLSKVTCQSKTQNSQFITGASSKSAADALKNAAAIGSSEKM  
ECGPTLAIASGAVPRIGTGYAENVEVEARIDELIASIESSKEIDYNKQDFSDSISNTRRL  
MSGSSVLSTGNNTPEFSFTNTPDVGVEVLYIPQVKGRIKKTHTKHNRKSVNVIFNMVNRS  
LDEMKEKIETERKITDEIYINKESPVTQTDVEPSITFIPKITNFNDIPLILFKYLGEFLG  
IDEYKMLHDNGKVPLIDITQMSNILNNFNQKIGANF

>gene\_1847|GeneMark.hmm|237\_aa|-|2421|3134 >NVVL01000097.1 Rickettsiales  
bacterium isolate NORP64 Contig\_source1382A\_29601, whole genome shotgun sequence  
MQTWKNNIDIPDHWKESISSIKSKMPKWRHVLMTDEDNRNFISEHFPDFLEYDYKFPHNIQ  
RADAIRPCWLYVHGGIYMDLVLVQKNLEELLVNSGAHFVASGNISHTITNSFMASEPGN  
PIWLEYIEQMKLAPPFWAMGKHMVRMTTTPGLCLTRVINESTQSHTILPNKLLMPCSVCN  
ISRCDTTKSYIKPIKGQSWNDWTSHTLNLCMCKWRELLLILALLLISYVLPQL

>gene\_1848|GeneMark.hmm|315\_aa|+|3193|4140 >NVVL01000097.1 Rickettsiales  
bacterium isolate NORP64 Contig\_source1382A\_29601, whole genome shotgun sequence

MRSRKKCRNVFIRGAQGIQGDQGLTGDQGDQGLTGDQGDQGIQGIQGDQGIQGLTGDQGI  
QGDQGDQGIQGIQGDQGIQGLTGDQGDQGDQGDQGIQGIQGLTGDQGDQGDQGDQGDQGD  
QGDQGDQGIQGIQGDQGDQGIQGIQGDQGIQGIQGIQGDQGDQGDQGDQGDQGDQGDQGD  
EGDGAWDFSFNTSLSLGGRVYVESDVVSTSGSSPFVNVVCILEYPGSDLVGDINYWSVTCAL  
TDDCCGEAELFVVSTNSVISSIEIKFGTSLLPVSALSFSFSNIPTSDSVLGIRMRITESV  
NGRCLLTLYSSKITC

>gene\_1849|GeneMark.hmm|259\_aa|+|4169|4948 >NVVL01000097.1 Rickettsiales  
bacterium isolate NORP64 Contig\_source1382A\_29601, whole genome shotgun sequence  
MRTLCLVIGFDYKNTKKNLVCIFIDLYIAYTSLKNMGHKKIMIITDIVETPDILLKNAI  
FDGLVGGNLSFMSEIRNKGKIKYKTSISLKHLMISLVKLNNQEKMLLYTGHGENNSI  
TLPTKFDVLSMNDIKDIEESTKINKAIIIMDCCFGSINLPYTLRGKTYRLSTNDMKFSK  
KKILCISSTTKCGTSLMTNTGSVFTKSLFENIALSDVVEITNRINTEIWTKSNSKQKVTV  
YSSHPNIKITQILELGN

>gene\_1850|GeneMark.hmm|264\_aa|-|4958|5752 >NVVL01000097.1 Rickettsiales  
bacterium isolate NORP64 Contig\_source1382A\_29601, whole genome shotgun sequence  
MNRKIKYQKLLVLSIKAKGGKLLTPYVRSVVKVSVKCKQDHIFSCTPKSIKSGKWCSECP  
IQKKINAKNIIKKGELLKYSRETTIIRVRCGRGHIFKTTQKKVLLRWCPMCSGSRG  
EIECSVYLNKSGIEFFKEVKGNLEKIDIHKVDIKNRRDFYVPSHLLIEYDGRQHFSK  
IKFYNGTPFKERQKIDKDKTIVALECGYNVLRIDNNSHVIRIRILGKTLELIKLDINSSN  
LYITSERYSYLDHNNKMVYVQSKF

>gene\_1851|GeneMark.hmm|49\_aa|-|1|147 >NVVL01000098.1 Rickettsiales  
bacterium isolate NORP64 Contig\_source1382A\_29766, whole genome shotgun sequence  
MIMRIVKRWGKRVWLHFRLKRIWNNLFTSIINCRIFIKIIEDMSNRKIK

>gene\_1852|GeneMark.hmm|80\_aa|-|155|397 >NVVL01000098.1 Rickettsiales  
bacterium isolate NORP64 Contig\_source1382A\_29766, whole genome shotgun sequence  
MSASQEDEFELNPLPPDIDPLVKAKMIKLNRRFLQQNLPAWRPVSTFRSTLVTFIVIGS  
VFLALGILLWMETLAVVEVE

>gene\_1853|GeneMark.hmm|50\_aa|+|482|634 >NVVL01000098.1 Rickettsiales  
bacterium isolate NORP64 Contig\_source1382A\_29766, whole genome shotgun sequence  
MDLKEIMVSLVLGNDCLQDRIITIMLVTTNMIFANIKEKMLMEAGLKIII

>gene\_1854|GeneMark.hmm|164\_aa|+|1012|1506 >NVVL01000098.1 Rickettsiales  
bacterium isolate NORP64 Contig\_source1382A\_29766, whole genome shotgun sequence  
MDIVLNPINKDLTRIPVTSITMAKTLTSAKRTLKEDLYDHRIKTAGVSLTLLRPSLLE  
LLIEQEDITEAAMESDNTREQMTNIIKAEVNVIAEERGVEGAQILVTQVRQNVVVEEDKD  
KEADIGDIVAIIDTLTEALNDSTEIEASTTDTRNVIKTASFLSP

>gene\_1855|GeneMark.hmm|69\_aa|+|1617|1826 >NVVL01000098.1 Rickettsiales  
bacterium isolate NORP64 Contig\_source1382A\_29766, whole genome shotgun sequence  
MCDTDPKELSQTNATLLEDLNCQLSSQVATHNEEQWKIDSTILSEFAVQSILDKDRGS  
AIQSRIFGD

>gene\_1856|GeneMark.hmm|35\_aa|+|1845|1952 >NVVL01000098.1 Rickettsiales  
bacterium isolate NORP64 Contig\_source1382A\_29766, whole genome shotgun sequence  
MLRDLLEKDNISLTRTLQHRFEEVEKLNIVDAEE

>gene\_1857|GeneMark.hmm|89\_aa|-|2408|2677 >NVVL01000098.1 Rickettsiales  
bacterium isolate NORP64 Contig\_source1382A\_29766, whole genome shotgun sequence  
LIVSYGILTL PNSAGAFELECPTWRPMTGWKDEAFTFYLGPPKLVNSDPISKDLGKRAQ  
LTSISSGSHVHVHCEVIMKNFKELGSLGNN

>gene\_1858|GeneMark.hmm|97\_aa|-|2704|2997 >NVVL01000098.1 Rickettsiales  
bacterium isolate NORP64 Contig\_source1382A\_29766, whole genome shotgun sequence  
MKEQLPITNPRYISSVKSLSVAQILIPKLVYFAKFRLSMENTGLLFLKLVFKLILHFLMM  
MECLYGLILLICISMLGVFMVGLGLYVKCGDLMISVN

>gene\_1859|GeneMark.hmm|60\_aa|-|3228|3410 >NVVL01000098.1 Rickettsiales  
bacterium isolate NORP64 Contig\_source1382A\_29766, whole genome shotgun sequence  
MITRRGAISPKKLPEVIENFPPEMPTATVGGGSMNHKIVPDKAILPFNGLNQNYKKDE

>gene\_1860|GeneMark.hmm|91\_aa|-|4683|4958 >NVVL01000098.1 Rickettsiales  
bacterium isolate NORP64 Contig\_source1382A\_29766, whole genome shotgun sequence  
MIMPQINGGFAAPVPLTNEQNQLQIARRKSTDLRDYNDGMQNNYRIGDDGMYAERKISD  
FPYGYRNDTNHLDPSSAGNPFMHQMMSSPSF

>gene\_1861|GeneMark.hmm|48\_aa|-|4974|5120 >NVVL01000098.1 Rickettsiales  
bacterium isolate NORP64 Contig\_source1382A\_29766, whole genome shotgun sequence  
MENSGIKSRGQSFDTMIDMEKGVDIHGVTAEALHDPMMVVRNFLTQRQ

>gene\_1862|GeneMark.hmm|64\_aa|-|5453|5647 >NVVL01000098.1 Rickettsiales  
bacterium isolate NORP64 Contig\_source1382A\_29766, whole genome shotgun sequence  
LEMKGHLHRCKIGSVISIKMSNLKFLWLLSETNATSKIDKSNLKLHRLNLLTRIKCFMLK  
HQQK

>gene\_1863|GeneMark.hmm|104\_aa|-|5696|6010 >NVVL01000098.1 Rickettsiales  
bacterium isolate NORP64 Contig\_source1382A\_29766, whole genome shotgun sequence  
VEAVPKEAIVNLIKAGLISVSKSLAMLSRDKMKKILINNAKLFYLEIVESANQVFHFAIV  
KTCFRLRMKLLL GALT CNNGFNCPMEASYSCMFGIQEGRRGLEL

>gene\_1864|GeneMark.hmm|643\_aa|-|3|1931 >NVVL01000099.1 Rickettsiales  
bacterium isolate NORP64 Contig\_source1382A\_29788, whole genome shotgun sequence  
MSRKQKKEEEEDLTELEIASRSWGGFKGHFTRVVKSAIKSLDFAPHVPGSLLVINNLKEH  
MESVQKAFTRADSSLSVCALLDDPDVQGDYDGKAEELHARRDNIIAQQLMDQIDELIAKAE  
DRKN TAALEAAAAAPLHGQGAGPGPTVRPNAELKPPTLTRDFTPVEFRSWSEKFRAYH  
SSSRMELGKVRDQAYLRACLDSYLD SRLARKLEDDTPIFGRDSCAILQTEWEVRYPII  
ERRLEFWRTKQATGQWFTDWATALHRMGDEAELDNMTINQMYIMRYIVGTNDIKLREKFL  
AEIDPSLEDLQRIAGAYEVA AVSMKAVAPHQHQAQAHAMQTGQQGGRDKPRGQSGISRED

KMAEMRRKDLCFRCAKRKHENKSECPAINGSCNKCQKKGHYSPACLAGYEAKGYRQRVRD  
DDRQKEKYKKTTSQTKTNQVTATTNAILVGLTGTGENAATPRMMVQAKATSGTPFDFFPALP  
DTGATRTIIDADVARTYGIRPKKIKAEVLTASGQSMKCLGSAVMTITFVNRTIHVNALI  
VEGIRAGFIICWRDLIRLGLVHDTFPQPIQQAEVMAVDDKKPPSPSPSPDARGAPC  
GPSTGAIPKKRRQDSEHDRDGTRQNDNTADTIDSLVAEFADV

>gene\_1865|GeneMark.hmm|170\_aa|+|2595|3107 >NVVL01000099.1 Rickettsiales  
bacterium isolate NORP64 Contig\_source1382A\_29788, whole genome shotgun sequence  
VINSAAHEVDMRLDVGIVFGLGSFFRLVCVSDNNGNLNALSRLQCGHLADILSLSRNVVDLG  
EAMRVERGRDPLRRFVVTWWKKGWQRTSIPDDRMRCGESMRKVVRKRPLLHVASGGLLS  
AAGALSYAEVQSPCSQKQGNRHERDTHAGCVDLEQVEPAGGILFDRPVC

>gene\_1866|GeneMark.hmm|952\_aa|-|3229|6087 >NVVL01000099.1 Rickettsiales  
bacterium isolate NORP64 Contig\_source1382A\_29788, whole genome shotgun sequence  
RRQDSEHDRDGTRQNDNTADTIDSLVAEFADVFDKVEVTPMAGAPMHIHLREGVNVVRPTR  
ISTARLIPLHYREEAEKAIELFVRSVIEKVVTGNPTDWWAPAFFVPKPNGKVRLVVDYKQ  
INNQIRRIHPFPCPRDIIRGILPSTRYFIKLDVQGYQIPLDDDSKDLTTFLLPSGRY  
RFARAPMGLNSSSDEWCSRSDAAFAPVPNLIKIVDDALIQAPTERREALRLLRIALVCSRE  
HNITLSRKKIEAGNDISFAGYKITDKGVKPDSEKLSAIRDFPQPKDITTVRSFLGLVNQL  
GFFVVDLAHMTDMLRRLKKNIAFQWLAEHQSAFEQIKALLVSDMIVKPFDTALRTEILT  
DASRLHGLGYALVQRNEDSLRLIQCGSRLLPAESRYATNELEALIAWAITDCKFYLA  
GANFTVVTDHRPLVGTFAKPLGEIANARLLRIREKLVNFTFDIVWTPGKVHFIADALSRS  
PIFHPDAINDALSDDEGIADICAVHTYTVDNSVYVETADVQSLQNFNMEVMQSAAREDEA  
YSSTLRALREGKQLRDLPRDHPARAYRDQWEQMSICQDDILIVDFMRRIIIVPRSLRAKILQ  
LIHQGHAGYVRTKALAEYFVWPSMKRDIQKMIEQCEPCQRLRPSLPKEPLQLHKKATEP  
MESISMDLFHHEGREFLVTVDRFSGYPFVHKLSTSTAAIINILAEILNVWGFVPEIMTD  
GGPQFRTEFNSYCLQHDIRHRKSSYPNPQSNGLAEAAVKNVKHLMMRTPSEDFFAALAIW  
RATPRSHQEDSPSKLFLGRKPRIIPTLSATSSCQGEKLQEQTPSTEKSGKHQLQTGDRV  
RLQDPISRRTWTETGIIQSACESGRSYFVKTENGSVRQRNRRFLKKIDHEASFEANPEAEE  
RHEADKAECEKHPANTQLKRGRKMKYADAACKRAISPPKRRSARLAGKKAD

>gene\_1867|GeneMark.hmm|291\_aa|-|2|874 >NVVL01000100.1 Rickettsiales  
bacterium isolate NORP64 Contig\_source1382A\_29869, whole genome shotgun sequence  
LTYSSKQATLSVPNKFKNIQNGMQWIKAFIIGLILIGLSVLAVFFIWLAPVGAAYSAAKV  
MCSAIFVNGLTSTRAREIDVLADNNPLLSLITTNVDLRNQAVSAHAFGFRKRFAYRPNL  
GCTLADSPHEIAKLRNSTPVMTPVEPRPLLTSLPADVDRRALNSILFDAMDEPGLRPER  
RTRAVVILHDGKVVAERYAAGITAETPLPGWSMTKSVFNAILGRMRFEFGMISDLQEPVLI  
NEWQAEPGDPRATINYDELLMRSGLEFDESANPLSDVVQMLFIEPAAAAG

>gene\_1868|GeneMark.hmm|391\_aa|-|897|2072 >NVVL01000100.1 Rickettsiales  
bacterium isolate NORP64 Contig\_source1382A\_29869, whole genome shotgun sequence  
MPPIAAVILIYGLGLTASMQVGLIGPIAPDLRASFGLSQAEFGLVASLITAAGALCAIPA  
GVWAARAGLRKSLVLGCVMMILGALIFATASVSSLLYVGRVTSVGYLLIVVGAPSWMAG  
FRNPKLVAMAMSIWGTFTIPVGIAGLNWISAAVVTWIDWRLAVGACTLPVLILLPLALMD  
KPETGSARRSLLLVIGVGLKSRALQVAMTFAAFAGATSAAALAFMPAMLADNLDIGIALS  
AGIIGTTAAGNVVGSVAAGAVLGRSIPGRAILIVFLPIMAVAISTLFVSTSVPLSISML

IVFNICQGAVAGTCFALLPKIATEGLSMPALQGMLAQFAEIFVVIVPPFAGAMIDRDGWA  
GAAAVLGGFYFIGFLVSLRKPASAPIRQKS

>gene\_1869|GeneMark.hmm|193\_aa|-|2183|2764 >NVVL01000100.1 Rickettsiales  
bacterium isolate NORP64 Contig\_source1382A\_29869, whole genome shotgun sequence  
MKPMDDETAPDKEFGRLLRQWRRTSDIKQSRLADILGVTQATVSRWESGAQSPAPLQYDLI  
HQMMTRKRNFRDLHAVKRLVMHSSQRVHLIEDRSHRLLCASRPRENEWQRDCTPLLGTSL  
WRFATPEIASAEKSLHDLGWHEHQDHTLTFETSRRDGDPMRIIDTYILWERFFLSGDGTAV  
RLTTGFDQKPAHI

>gene\_1870|GeneMark.hmm|189\_aa|-|2833|3402 >NVVL01000100.1 Rickettsiales  
bacterium isolate NORP64 Contig\_source1382A\_29869, whole genome shotgun sequence  
MRIVGGTHRGRLLSAPEGRDTRPTLDRVREALFSILSHASRWYEDDFNPLFDGVILDFAFA  
GSGALGLEAISRGADQAVFFDNDRKAVAIIEQNIDALRISDQASARRADATKPPRASRPA  
SMVFLDPPYGKDLIEPSITALAKAGWIDGNTLIVAERDPRDPEIALED FYLCDSRKYGRC  
QIDIGRFIA

>gene\_1871|GeneMark.hmm|437\_aa|-|3408|4721 >NVVL01000100.1 Rickettsiales  
bacterium isolate NORP64 Contig\_source1382A\_29869, whole genome shotgun sequence  
MSDKNTTPDDNKPERIAKRIARSGVCSRRDAERMIAEGLVRLNGKKLDTPAVTVTDEDEI  
IVDGKPLPEKEKPRWLWRLFKKRGLVTSRDEQGRD TVFEHLPSYVPRVISVGRDLNSEG  
LLLLTNDGELARYLELPATGWARRYRVRVHGQIDEAKLKQLEDGVTVDGINYGSIAEVD  
VQKGTNAWMTVTLREGKNREIRRVMEHLGWVPTRLMRVSYGPFQLGNLAPGECEEVTGKV  
MKEQLAAFFKGDYSKVSEKKSARGGTSRPAKRTVFGQPAQRKRPQGGPNATPQNAEAE  
EQRETRERPSGGAARKGPRIGAAPRAGGRGKPATGGGGRQERDMREERGSSRPTNKGRGR  
YSAEGKAASGRDGGRDGGRDGGRTGGREGKPGFIEGRGRGKPNGKPSGKPAGRSGDTH  
SAPGRKPSGNRPRGKKD

>gene\_1872|GeneMark.hmm|240\_aa|-|4718|5440 >NVVL01000100.1 Rickettsiales  
bacterium isolate NORP64 Contig\_source1382A\_29869, whole genome shotgun sequence  
MNTRKPIIGITLDSEEPGGYSKFPWYALRENYAGAVTEAGGIPMPLPHEVELVPDLLDLI  
DGLVVTGGAFDVDPTLFGATETHDTVTKDRRTKFEWAMAEGALERDMPVLGICGGQQLL  
NVILGGSLIQHIPDAIENCLPHEQP NRPNEPGHDVTEPNTLLAKIVGDVKTLSVNSAHH  
QAAEGVGPDVIINSYAPDGVIEGIEHPKYRYCLGVQWHPEFHSSGDAKIFDALISEARK

>gene\_1873|GeneMark.hmm|110\_aa|+|5711|6040 >NVVL01000100.1 Rickettsiales  
bacterium isolate NORP64 Contig\_source1382A\_29869, whole genome shotgun sequence  
MSADSYMDMALEEARAAARRGEVPVAVLVDADTGEVLARAGNLTEEMNDPTAHAEILVI  
RAAAGAKGEPRLPNCDLYVTLEPCPMCATAISFARLRRVYFGAYDPKGGG

>gene\_1874|GeneMark.hmm|1142\_aa|+|165|3593 >NVVL01000101.1 Rickettsiales  
bacterium isolate NORP64 Contig\_source1382A\_29891, whole genome shotgun sequence  
VDTDMGKKYTKFEFYDQKLSHINDIRFTYREMDVLA CLVNKLEEEEISLLLSIASQTIKT  
YIRNIRIKIGNNSRISILRFVEKSQYLLLIIEYKYINIEASFQKQLLNIGTKINPELIS  
IKLSHGGLSKTEQNKILNDHLKLSNIILENLPHPDTNAPPNTRHPNISHSNTNHPEIC  
HESVSVLGSSLPSRSLQDIIMLESTDLDFDKNEIIDLENNYYESVFILIEKILKSPKIQ

DDFDKHKVNSKLSFKRASKSPWNKLYLIVIFSVLLAAILAYNNLIFSFKTKTVIKSNLF  
LSQVDSKLYRSGMTSLIKNKAFAESSDIQKVVLGAGGAGKTTLARQYAKNSNARIWEIE  
AITKEKTFLSLQQLASELCENNIESQDLKAILSRGNATSRYGKFMSFLTQKLKTHSNWLL  
YDENVKNFQHIKFFPYDHNVWGTGKVIITRNSNISSNIFIPDDNIIYVGELNPKDKRT  
LFDNIIIDLGMTEKEKIKINDFLAQVPSFPLDVSLAAYYIKETNISHERYLNQLLKRDK  
KFVLKQEKLLSEIGEYSNTRFDIVAICTKQLIKNNPNFQELLFLISLIDPQTISREILLD  
FKSNIIVDRFFHFLKKFSLITKRTLSIHNQNIDSISLHRSSGRIILSFLKFSFMNEAEKQA  
VYNQVNQSIKYMMLKVIDQCEDITKILIRHAESFIRNTKENPIDIKMGNLLSECYMIVG  
EYKSKQLLHEIISVNNLQDIPNSENLAETISHLGNVYRAMGKYQEAQEHLEESSKLLAQ  
TYGLKNIITRKALINLSYTYRDLGKYHKAKNILKMDLNVSKELKNIPIELANIKAEALAD  
IYKLGMYDIALKYQKAIATLKNHYGNNTTKIAWIYVQLGALYRNMGLYKSKDLVDQG  
SRFFIDNYGKHSVKIAWILIQKGNIIYQDIGNTKNITELFKRAHRIYQDYGENHIKLGWA  
SCYLGRAYSFKGLHKESISFLKQAVKIHKMHYGLDHVKTAWAQSHLINSYKNGNLTEAQ  
HLLQVNIYKDFYGATHVKYAHILLAKGQISFAKGHLELAEMMYNDALDIYNNSSHAGR  
YKCFEALGDLYLFRAQNNVSGNINISNIIYKAKYFFTESLDILLKDFPKDSPHVTRIQS  
KI

>gene\_1875|GeneMark.hmm|703\_aa|+|3771|5882 >NVVL01000101.1 Rickettsiales  
bacterium isolate NORP64 Contig\_source1382A\_29891, whole genome shotgun sequence  
LSRIKKFLYFLGILITIGYYIFFHKPKADLIRSELPLCNEIILVRSDLINQIASSLK  
EKSGIQTVVLHGIGGAGKTTLARQYASSQPYPPIIWEVNAENSATLNASFERYSSCKSE  
KLKNEFKLISKDNDAVRRERNLVFFAKIVREYDNWLLIYDNVRQFHDIEKYYPYDTSVW  
GNGKIIITRNSRIKDNILIPDSNMIKVDDELTELEKTALFKKILPNNINESLKNELANQE  
FLKTIPSFPLDVITAAYYIREEKTPFAEYLKYIETHNNQFTKLQKELLLNIGGYDKSRYG  
IISTSVKHLIENNDLLPQLLLLCLLDSRNIPYNLVTKSKDPYIIDQISNIQKLALISLED  
KTNNFISHRSTQAIMLSVILDIVDAERVKKVTNQQVLDVFKYLDNKLSSFSTAEIKLMI  
NHMQRMLGRLEISSDKSRILLKQALGEYHLRIDQDKQAKELFRQVSDNKKHRDQNSTET  
ATSLVLFITLVDAENDKAQELITTALNIFEKNKEDDNNIAWAKVWLGVIQRNNGDYKK  
SIDLLEQAVSIYDKNKKEQSLYWAYVYLGSSVYSIGNNEKAKYLLEKAQDFFIENNGPKH  
FRIAWLSTYLGVYTNMKEYKKAEDALNTSLTLHKNLFEDKHYKIAWSMENLAALYTELG  
KYQKAKSLATRAIAIYNADESSNLLALSRTKALLNKINQALGE

>gene\_1876|GeneMark.hmm|48\_aa|+|173|319 >NVVL01000102.1 Rickettsiales  
bacterium isolate NORP64 Contig\_source1382A\_30088, whole genome shotgun sequence  
MVIPGYQGFVPGVKADNIYGKTNTEASRKVLNKTLDGRIGFNSFVNIG

>gene\_1877|GeneMark.hmm|57\_aa|+|485|658 >NVVL01000102.1 Rickettsiales  
bacterium isolate NORP64 Contig\_source1382A\_30088, whole genome shotgun sequence  
MISPVKLAKPNVRSKSVISYKMQLPEPTLGKDSGSGFAPNKPMRISNMMCLNIDYLY

>gene\_1878|GeneMark.hmm|54\_aa|+|954|1118 >NVVL01000102.1 Rickettsiales  
bacterium isolate NORP64 Contig\_source1382A\_30088, whole genome shotgun sequence  
LEKKKAPHKLTVEDASNDNSIVEMTQAKMDELKIFKGDVLLKKGKSMVGLISV

>gene\_1879|GeneMark.hmm|420\_aa|+|1151|2413 >NVVL01000102.1 Rickettsiales  
bacterium isolate NORP64 Contig\_source1382A\_30088, whole genome shotgun sequence

LVAEDSDNLDNSKLRMNKVVVRKNLCVRLGDIVQVHPCPDVPNGNRVHILPIDDTIEGITG  
NLTQIYLIPYFKDCYRPLRKGDTFLVRGGFKAVEFKVETDPGEYCIVSPNTMIFDEGEP  
IQREDEDQRDGIYDDIGGCRQQMAKIREMIELPLRHPTLFKTLGVKPPRGVLLYGPPGS  
GKTLIARAIANETGAFFFLINGPEIMSKMAGEAEGNLRKAFFEEAEKNSPAIFIDELDSV  
APKREKTQGEVEKRVVSQMLTMDGLKGRGQVVVIAATNRPNSIDTALRRFGRFDREIDI  
GVPDEVGRMEIMRIHTRNMKLGEDVDLAAVAKETHGYVGADLAALCTESALQCIREKMDL  
IDIEDETIDAEILDAMFVTQEHFTFAMGQTNPSSLRETVEVPNVQWDDIGGLDETCKSL

>gene\_1880|GeneMark.hmm|200\_aa|+|2465|3067 >NVVL01000102.1 Rickettsiales  
bacterium isolate NORP64 Contig\_source1382A\_30088, whole genome shotgun sequence  
MSPSKGVLFYGGPGCGKTLAKAVANECSANFISIKPELLTMWFGSEANVREIFDKAR  
GAAPCVLFFDELDSVGAARGSSQGDAGGAGDRVMNQLLEMDGCVGGKKNLFFIGATNRPD  
ILDEALIRPGRLDQMIYIPLDLPSPRSILKAVLRKSPIAQNVSIEFLSQMTENFSGADI  
TELCQRAIKAGIRESIEAEV

>gene\_1881|GeneMark.hmm|126\_aa|+|4273|4653 >NVVL01000102.1 Rickettsiales  
bacterium isolate NORP64 Contig\_source1382A\_30088, whole genome shotgun sequence  
LLREEKRADDNFDPPQTKFKILDTSQMEVVEKHAQALAEKEGTGCREMFKHKKLEELALMY  
RVFSRVELTLKYILDQMYPYIQRGKILVMDKELEKNPVEFTKKLLELKREMDMVESSF  
NNNMKF

>gene\_1882|GeneMark.hmm|138\_aa|+|4684|5100 >NVVL01000102.1 Rickettsiales  
bacterium isolate NORP64 Contig\_source1382A\_30088, whole genome shotgun sequence  
MNEQQVTAHFIAASYCDNEFKKGLKGVSEAETDSRLDAIIRLFCCLHSRDVFKQYTKFLA  
GRLLNKSSISDDAEQLMLSKLKVCEGLQTVNKMSHMFTDMTSLKELMNEFKKSPFGNDGF  
INGVEIHCEVLTNGHWPE

>gene\_1883|GeneMark.hmm|60\_aa|+|5287|5469 >NVVL01000102.1 Rickettsiales  
bacterium isolate NORP64 Contig\_source1382A\_30088, whole genome shotgun sequence  
LLLFNEKEVYTYEEVGKQLNLDAKVLHTQCMYMFSPKMRLLTKENAKKPMCTPDEKISIN

>gene\_1884|GeneMark.hmm|70\_aa|+|5599|5811 >NVVL01000102.1 Rickettsiales  
bacterium isolate NORP64 Contig\_source1382A\_30088, whole genome shotgun sequence  
VVRIMKVSFIVTLKARKEEKYNPLLEEVFRQIQMFRPQPKMIKERIESLIEREYLKRD  
NDRSRYIYLP

>gene\_1885|GeneMark.hmm|280\_aa|-|82|924 >NVVL01000103.1 Rickettsiales  
bacterium isolate NORP64 Contig\_source1382A\_30229, whole genome shotgun sequence  
MIHAIEIAPSGLLQGLLISLLVLGVMIPFRLLDLPDLAEGSYPLGGAMCASLIVVGV  
PIFALILACLCSGMMGVGTAFVHLRYGVNTLLAGIILSTMIYSVNLVVMGKPNIALFEHP  
NLFSDLSSGLSSQIALLIINFVVMCGLFLFNTEKGLRFRAVGLNAKFAERQGANLKKN  
ITAGLFMGNALCGLAGALLVQIQGYADIGVGVIVHALAAMMIGEKMIGTHHTLRMVAA  
PFIGAILYQQIQGIALAVGMAPSDMKLLTGIVVLGIIALR

>gene\_1886|GeneMark.hmm|250\_aa|-|921|1673 >NVVL01000103.1 Rickettsiales  
bacterium isolate NORP64 Contig\_source1382A\_30229, whole genome shotgun sequence

MLALKNISKSPQITAKVLKNINLTIDEGEYCIILGSNGSGKSTLLKIISGEYSADHGQI  
FLNDIDITKQAIHRAGHISSVAQDITKGVIQDMTLENMSLSNLRGQDASYKFYKDQSA  
RILESVRALGLGLEKFLHSNMSTLSGGQRQAVATLMAMEPRPSILLDEHTSALDPVRQG  
KIMHFTNEYIKQHNTSLMITHNIEDAAKYGNRLIIMHHGEIVFDVKGQEKQALSSGELL  
DILYKMGGSL

>gene\_1887|GeneMark.hmm|326\_aa|-|1679|2659 >NVVL01000103.1 Rickettsiales  
bacterium isolate NORP64 Contig\_source1382A\_30229, whole genome shotgun sequence  
MLRSPKIYAFAVIALISLLSIFKTDPNRSAKTLVAIANYGPHSSLLQTIDGIKEELTKL  
GYTEGENINYEISDVNFETSLIIQMLHLKASKPDVIVAISTPIAQAAKNLIKDIPVIYA  
NVTNPEEAGLVSDIDITNITGASDRQDFSVMLDFAKKLLPRAKTVGVLYSLGEANDASMV  
DALKKTAEILSINVLAVPIEHTRDVATRMRFVFGNVDFIYTGSSGAIQASLPAIATAES  
MKLPVFNFNSEAEMSHNVLASYGISHRQIGANAGQIIHRVLLGIKVPDIKPVYDPKADYA  
GFISRKRAAKIELAIPADLKNVTIVD

>gene\_1888|GeneMark.hmm|615\_aa|+|2991|4838 >NVVL01000103.1 Rickettsiales  
bacterium isolate NORP64 Contig\_source1382A\_30229, whole genome shotgun sequence  
MTQETKKFDAEIGKVLHLMIHSLYTNKEIFMRELISNSSDACDKLRYLSQTDAALTKGDA  
DFKISVKVNKEARTVTIRDNGIGMNRDDLSENLTIAKSGTQKFLEHLSGDNKKDSQLIG  
QFGVGFYSSFMIAQDQITVTSRKAGEDKVYSSWSSDGAGEYIADSDKEFSRGTEIVLHIKK  
DEDSFLDHFRLKHIVKSYSDHIAVPIFFEDEEGVQAQVNSSSALWRRAKSEIKKEEQYTEF  
YKTVSHAVDTPWLTMHKNNEGVEFTNLLFIPSTKTFDLFHPDRKCRVKLYIKRVLIGDE  
NIDIVPQYLRFLRGVVDSEDLPLNISRETLQHNAVLEKIKKSIVKRTLSELKKNKKNFD  
EYALFWDNFGGALKEGLCEVTSDEKLELVCLFRSALHNKMISLDEYLANSKDKEKIYF  
LSGDNPEKLRNNPQIEGFLSKGIDVLLFTDAVDDFWINVNGTYKEAQIKSVTRADIDLGT  
DKDAGDKKEENSVEPLSYFKEALGDLVKDVKISKKLTSSPACLTVADGAMDIRMERYL  
IEQKQLSTLSAKILEINPGHKIVTKIANDLDKSDKHEENKQLIHLLHDQACIEGEPVVD  
AAAFSKRLNSLLEMV

>gene\_1889|GeneMark.hmm|186\_aa|+|5072|5632 >NVVL01000103.1 Rickettsiales  
bacterium isolate NORP64 Contig\_source1382A\_30229, whole genome shotgun sequence  
MSRRFGSNGAFKPFVQKSRPYPPTLAHPEGYIDTDEHPRPQSNEYPLSKKRKLNIDEP  
LEICRFRGQIISKLDSSNLDIDVAAEIEAKTFSQKLYDFTARSEYDPSIKEFTAWGVALL  
DLEDFIYQHRKIQIYLDHLQANKSQYNSNNSYNLAVGYLTELTAIHPSDTIEIGIAGLEI  
CMICYG

>gene\_1890|GeneMark.hmm|37\_aa|+|3|116 >NVVL01000104.1 Rickettsiales  
bacterium isolate NORP64 Contig\_source1382A\_30523, whole genome shotgun sequence  
KAAVNAHGGEVKVESSGAGVLFVRVPLASDRGRPRS

>gene\_1891|GeneMark.hmm|247\_aa|-|353|1096 >NVVL01000104.1 Rickettsiales  
bacterium isolate NORP64 Contig\_source1382A\_30523, whole genome shotgun sequence  
MRFDMKNPSAAAIIIGNEILSGRTLINTQEIARLGEIGVTLVETRTIADDHDMIVTTV  
QELSNKYDYVFTTGGIGPTHDDITAKAIAAFNVGYVRNAEIIDILKRHYISIEEQRAVG  
REKMAYIPDGAKLLYNDATNIPGFLTGNVVFAMAGIPKIMKSMKTAIPMLKKGKIVKSES  
IDIMTGESVIASDFEALQKQYQNVEMGSYPFQKDGVHATSLVLRSSDYEALDLAFSEVKT



LCKKLGR

>gene\_1892|GeneMark.hmm|524\_aa|-|1197|2771 >NVVL01000104.1 Rickettsiales  
bacterium isolate NORP64 Contig\_source1382A\_30523, whole genome shotgun sequence  
MRWVFIISVFSLLFVLVGYQFWPPAIYFLIIIPYIAIGIHDIFSVRHTILRNYPVVGH  
LRYMLEFIRPEIQQYFVESDRDGTYPYPREVRSLIYQKSKGVRETIAFGTKNDITSVGYQF  
SYHSLSPKEVASENARVTIGGKDCTKPYEASRLNVSGMSFGALSPNAIKALNKGAKIGNF  
AHNTGEGGLSPYHLDGGGDIIWQIGTAYFGCRDKEGNFSPEAFKATAEKEIVKMIEIKLS  
QGAKPAHGGILPAVKVTKSEIRMVEMGEDAISPPMHAECTPIELLEFVAKLRKLSGG  
KPVGFKLCLGHRTEFMSICKAMIKTGKPDFITIDGAEGGTGAAPVAFTNKLGTPIEA  
TFVNNCLVGANLRDEIKLIASGKVATGYDMVTKIALGADLCNAARAMMFALGCIQSLHCN  
TNACPTGIATQNKHRWSALNVKDKSIRVANFHKRTLHSFLELVGALGKDNPELDPHIR  
RYADISTSKSYATIYPQLSPGELLAKDVTGIYADLWKNSQAERY

>gene\_1893|GeneMark.hmm|739\_aa|-|2850|5069 >NVVL01000104.1 Rickettsiales  
bacterium isolate NORP64 Contig\_source1382A\_30523, whole genome shotgun sequence  
MSNKNDNIENVDFGDAISERYLSYALSTIMSRSLPDVRDGLKPVHRRLLYAMLKLNLDPA  
SRYKKCARVVGDVIGKYHPHGDTAVYDTLVRLAQGFSRLRYPLIDGQGNFGSIDGDNAAM  
RYTESKMTEICTLLMQDIDQDVTDFRATYDESDTEPVLMPAQFPNLLANGSEGIAVGMAT  
SIPPHNLHELCDALIYLIDNQKEASCADMMRFIKGPDFPTGGTIIDSKEAIASAYNTGKG  
SFRVRAKWEKESFSHGLYQIVITEIPYQVQKSKLIEHIATLFKDKRIPLISNIRDESTEE  
IRVIIEPKGRNCSPEMIMESLFLTALESRVHLNMMNVLRSARKAPKVMNILEVLQEFIAHR  
QEVILRRTKYQIGKIDDRLEILHALKIAAYLNIDEVIRIIEEDNPKQELIAKFDINAVQA  
EAILNIRLRALRKLLEEEHINAHEDELKHHVLSKILGNSTVLWVVKNELKMOVQKFGY  
DTIIGARKTDFNEIEPSAQIIDISAFIEKEPLTIICSKMGWIRSMKGHNLDLAGLKYKEG  
DTQAFVIESYTTDNILVCSTAGKFFTILADNIVRGKGGGESVKLMVDIENYDVLQILPHK  
PAEKILLGSSNGKGFVVNSDDLITKARSGRQVMNVKGDVICQICKPVTGDMVAVIGTNRK  
LLVFALDEMPKMRGQGVMLQKYRDAKLGDVKTFSNEEGLSWNLGSKIRLEKEIMSWRAG  
RGSIGKIPPTGFPKNNKFN

>gene\_1894|GeneMark.hmm|108\_aa|-|5316|5642 >NVVL01000104.1 Rickettsiales  
bacterium isolate NORP64 Contig\_source1382A\_30523, whole genome shotgun sequence  
MARVAKRLRLRMTDEERIEYHKYLKESAVQEDILHAATERGREGVEEGMEKGREEGRE  
EGREEGLSKGAKLANIKAAMLVKGLDIDLISQISELSIDEIMELKN

>gene\_1895|GeneMark.hmm|39\_aa|+|111|230 >NVVL01000105.1 Rickettsiales  
bacterium isolate NORP64 Contig\_source1382A\_30565, whole genome shotgun sequence  
MKIAMINSAMRIVPNSHGQKENLDPVPIKITFALEISS

>gene\_1896|GeneMark.hmm|77\_aa|-|446|679 >NVVL01000105.1 Rickettsiales  
bacterium isolate NORP64 Contig\_source1382A\_30565, whole genome shotgun sequence  
MICKSPRSYSLPPTGQIPFSLPFGVAFNEDEFRPWTHSGHMYRFYDQPRLSKAVPYEVNL  
NEVSEVYVYAARKSIFY

>gene\_1897|GeneMark.hmm|62\_aa|+|853|1041 >NVVL01000105.1 Rickettsiales  
bacterium isolate NORP64 Contig\_source1382A\_30565, whole genome shotgun sequence

MILRWEWSMNNYSKLLGQGKSHSLTAEGHRVNDISFGLRLEPQLLRKRGLLYNQVELKRN  
LI

>gene\_1898|GeneMark.hmm|264\_aa|-|1241|2035 >NVVL01000105.1 Rickettsiales  
bacterium isolate NORP64 Contig\_source1382A\_30565, whole genome shotgun sequence  
LDTSYSTNEIKIYQYTSSFVEYFYKQPVVKEIFPHSGASHGGTQVQVAGAWFKHRPQYG  
LIPYCKFGEKIVRGRFISTVRIVCEAPPKEGRGDRVRFEVSQNGIDFTETNYEFSYFDQP  
DVLKIEPHSGPESGGTEVRIFGTNFSNHTFSKEFLCTFTPVEGNIPAKSIPARYENNTSV  
LCLSPGGWVGTAAFVRLTFNGQDASQSEHIFYFYNIVTAEPLSGPADGRGGLITVTGNG  
FSNSTTTFCKLDNELYKPYSVSAN

>gene\_1899|GeneMark.hmm|212\_aa|-|2219|2857 >NVVL01000105.1 Rickettsiales  
bacterium isolate NORP64 Contig\_source1382A\_30565, whole genome shotgun sequence  
VHYKATSKAIGYDGFAPKVFVDILTDNNITIWYYAEPEYEIVQPTAVPANQEANLMIKT  
DFKWEINNKEKIIAHGNFTCRFMSFDGKKVFTNATILTYPVGDEGDPNTVSCSPKWDL  
SGLLREENIRVDVSINGVDYSGDRILISENLVDYKIVPLCGPNEGSTRVKIIGTGFKQ  
KEEISVKWGVITRPLDKQALDFVYNEAEFE

>gene\_1900|GeneMark.hmm|106\_aa|-|3122|3442 >NVVL01000105.1 Rickettsiales  
bacterium isolate NORP64 Contig\_source1382A\_30565, whole genome shotgun sequence  
VKVVPEGLTRSFIIYDSPQILAITPLFGPVRSKTDEILEISGTNFKCPVEGCDLLCRFGK  
PPIAMYSKATRVSDTKVTCPIPKYAQPEIMDVELTLNGEDYTNNKH

>gene\_1901|GeneMark.hmm|49\_aa|-|3518|3667 >NVVL01000105.1 Rickettsiales  
bacterium isolate NORP64 Contig\_source1382A\_30565, whole genome shotgun sequence  
MTIKGKGFSPKLDQNGTTIVGDIWVRFTLIKNDKKIVEEESKAKLISDE

>gene\_1902|GeneMark.hmm|180\_aa|-|3788|4330 >NVVL01000105.1 Rickettsiales  
bacterium isolate NORP64 Contig\_source1382A\_30565, whole genome shotgun sequence  
VDYLYYETPIITRIEPICGPERGFTQITVFGKNFVNMFGMTMCFNNTIFTNATIMEHN  
IIKCDSPPAENWTRFTEEKIVYYYVKITLNGIEISGPEQKFIYYKEADIYSVTPNLGPVD  
GGTLSKIDGRGFNQIGVCNMTVRYATWQVKPLNYTYDYIFVESPPVETPDDVVAVGMNG

>gene\_1903|GeneMark.hmm|91\_aa|-|4445|4720 >NVVL01000105.1 Rickettsiales  
bacterium isolate NORP64 Contig\_source1382A\_30565, whole genome shotgun sequence  
LALVPATVLNSTKVICHSPASYILRQSIVEITLNNQEYTDNNVVFYRPPFVFDIEPRE  
GPTKGNNTTVYAIGSNFRNTKDIKCKFADIVV

>gene\_1904|GeneMark.hmm|78\_aa|-|5033|5269 >NVVL01000105.1 Rickettsiales  
bacterium isolate NORP64 Contig\_source1382A\_30565, whole genome shotgun sequence  
MTLNKEEWCLQCDNNDGKAEIVPFTVSLEGFSDCENSVAIRYKDPKVVWAIYPRYGK  
KNGGTWVQVWGENFLNFD

>gene\_1905|GeneMark.hmm|568\_aa|-|3|1706 >NVVL01000106.1 Rickettsiales  
bacterium isolate NORP64 Contig\_source1382A\_30989, whole genome shotgun sequence  
MTRPAGEPIGPS EDTALGPGILETIEANVRVMGIRSTARARMLMQCRAFVYVGS HDDHLRSR

RWDGSARDPGVGYLHERLKPQGFVPVQSIPYQQRKPDGMPLARQIINRFSEMLLGQGRA  
PGLSIPADVDTERYLEAVFSEAMCWDVLMWARDVTGSCGSAIVPSVNVNGVPTAEVLMPPF  
DIHVYRWKNGASWEPLVVEQRLVDRVVPDPETGKLDVQQYWRTRMWTETHTVTFDDVPQ  
NWPPEDPIPYRPENRVEHHAGRCPVVWYQNTRSSKSPDGAADCDGVWHLIDQTDREMSQV  
YKAARANVDPMLHIKEERLKKKIGAVTKGGLVMTSAAGDAKYVEMEGTSISVGLVVRT  
LRQEVLTAECEIIVDPASAGAYKTGEALQLLWRAMEAKTNRLRVMLTQTIRELSRIWLSL  
GRAVGVANLEDAKPGNGILLPPVVELVEQTTEEIVAGERPTPNLTTQSVGTGAHITFKWP  
PYWNPTAKQVNEMALAMGAAKNASLLSSSTRVTEMAKLLGIDPGDEFVKVKREQLAQK  
AEDDFEKEVDRMETQGTAAAVALPPPLP

>gene\_1906|GeneMark.hmm|231\_aa|-|1703|2398 >NVVL01000106.1 Rickettsiales  
bacterium isolate NORP64 Contig\_source1382A\_30989, whole genome shotgun sequence  
MRYLGGKSRIASKIVGLINSETPLDSPFYDVFAGGLSITCAAATTRTGPVYANDRCTLPI  
TMYQRWSTGWRPKKLGYLQKQDPLDPHTALAGFGMSFAGIWFSGYARDSVNTSY  
FDVSVRSLEKGMGPCQDVEFTCKDFSALSPSESVVYLDPPYKGTASYRYHQGFSTRLL  
SWSANLPTPHVFMSEYESPGPNWEEVGSFDTQGSGLSRKQEKLFRLISSPP

>gene\_1907|GeneMark.hmm|232\_aa|-|2411|3109 >NVVL01000106.1 Rickettsiales  
bacterium isolate NORP64 Contig\_source1382A\_30989, whole genome shotgun sequence  
MQYLGGKSRIAGAIVASINALTETGRPFYDVFCGGLSITVAAAATRSGSVLANDRCAPLI  
TLYSRWAQGWWRPARSIGYLDYKQLQAKQDPLDPRTALAGFGLSFGGKWFAGYARNKSGRD  
YYSSAVRVLSDKIKVCGGGVKFTCLDYSVIRVAPGSSVYLDPPYAGTTGYGYHKGFSRAR  
FLEWVTSVQNSGSDVFLSEYESPGDGWTCVEEFPLVHGRLATRPERLYHLPR

>gene\_1908|GeneMark.hmm|495\_aa|-|3132|4619 >NVVL01000106.1 Rickettsiales  
bacterium isolate NORP64 Contig\_source1382A\_30989, whole genome shotgun sequence  
VNLHEDQRARFNARTALICKRARQCPVEFTRWVSRVEKGAAIEVAATHVKWHQHLDHEDR  
VVLFAVPGHGSNQITRWRVWLWEIGRNPDIRIAICSAKELPAKVLNDIRKDIDGEGPGS  
QWLRMIFPHLARINWQVWADDRISLVRQGNPTIATYSPGTQILGSRDLIIADDLHDIKN  
TLTPLNREKVHRWFRTEVLSRDSGTRVWVLGHVWHEDDALHRLVREQEFKFKYSCYV  
ENEVSGAREPLIPEIWTLEKLALREKNLGPVSAKLMLFNLVDSGTGRIKREYFFECLRR  
GSTLGAKFATFWNPGDAPTVTGVDLGGGGSLTCLFTVAVLPDMSLRVLDVRSQDWTGPQ  
KIEQMEYVHQAFGSILCVESNGAQKMLEEFTTDMTALPIKGHHTGLNKHDMDFGVDLAT  
ELANRKWIIPCDDELRPNEIAFWINEAVAYSRDTHAGDRLMASWIAREGVRLSGFRRA  
SDRRDLIVDADTLVR

>gene\_1909|GeneMark.hmm|148\_aa|-|4627|5073 >NVVL01000106.1 Rickettsiales  
bacterium isolate NORP64 Contig\_source1382A\_30989, whole genome shotgun sequence  
MEEQVQTILEMATTGALSLLAMTVSGLLAWGARSIKHWLDSQAHMASFACASTKLASLAS  
DAVLEVEQTLVKQLKNDEAWNADTAKTARDTAAAIKRLHLGTRGLAELRGCLGLALADIE  
GLIRTQIEVSVQRAGTAGRHSPTVALGE

>gene\_1910|GeneMark.hmm|108\_aa|-|5091|5417 >NVVL01000106.1 Rickettsiales  
bacterium isolate NORP64 Contig\_source1382A\_30989, whole genome shotgun sequence  
MLKVLYKFMDDYSKMGDAFERVYERGGASAPGRLPKGAKVDFNIDPETVLPVAVVSTQPAVV  
AAQEQESEDFHQQLFRDFEAWSEEELEAYMSSGDMMPASEKFTP GSGDE

>gene\_1911|GeneMark.hmm|60\_aa|-|3|182 >NVVL01000107.1 Rickettsiales  
bacterium isolate NORP64 Contig\_source1382A\_31424, whole genome shotgun sequence  
MTKNGEGIDRDQFDKLSMLDPKTKKMIETLEFIKVNMMNHLPMYYIPGEEFPWNREFG

>gene\_1912|GeneMark.hmm|144\_aa|-|360|794 >NVVL01000107.1 Rickettsiales  
bacterium isolate NORP64 Contig\_source1382A\_31424, whole genome shotgun sequence  
MDRYNGREMGSRRLARSVFDIYDPSIQTGSGQSPHEQSSLQDEELPTFFLPQGLGTTIPGN  
IYYHINTTNKLIKLDYEENKNRDLTCDNLDEKNGHFIKFTFNNIGLIDSVTYMGTE  
EIVLQSLWAFVGLHENYLNMLTSR

>gene\_1913|GeneMark.hmm|40\_aa|-|1272|1394 >NVVL01000107.1 Rickettsiales  
bacterium isolate NORP64 Contig\_source1382A\_31424, whole genome shotgun sequence  
VIPEKHCHVEENYDDEPEMLKDLPIINPDAFCDENVEEKV

>gene\_1914|GeneMark.hmm|46\_aa|-|1653|1793 >NVVL01000107.1 Rickettsiales  
bacterium isolate NORP64 Contig\_source1382A\_31424, whole genome shotgun sequence  
LKRLMLETRITVINARMVDIDRDKNVILHDETIVPYDTLILSMGI

>gene\_1915|GeneMark.hmm|101\_aa|-|1836|2141 >NVVL01000107.1 Rickettsiales  
bacterium isolate NORP64 Contig\_source1382A\_31424, whole genome shotgun sequence  
LKKKWDHERAALEEEEEENKDDIDGHRDFLDENESGFALCFSSKRLLSEPKIVKNSRIVI  
VGASDTGISFIEALLSISYLNFTNIILVAPGGLPHQHTDER

>gene\_1916|GeneMark.hmm|84\_aa|-|2361|2615 >NVVL01000107.1 Rickettsiales  
bacterium isolate NORP64 Contig\_source1382A\_31424, whole genome shotgun sequence  
LHRDSLDDADILVRRVAADLDLIKPLCESLDEKEEVYDDIYDATINPEKYLSFIAKVG  
DNAIGAFVCSKDINLSYYKSHFHI

>gene\_1917|GeneMark.hmm|43\_aa|-|3294|3425 >NVVL01000107.1 Rickettsiales  
bacterium isolate NORP64 Contig\_source1382A\_31424, whole genome shotgun sequence  
MICFGDIQYDLRIIEKMPPEENKKKEDDKKEGDEGAEPKIEK

>gene\_1918|GeneMark.hmm|47\_aa|-|3444|3587 >NVVL01000107.1 Rickettsiales  
bacterium isolate NORP64 Contig\_source1382A\_31424, whole genome shotgun sequence  
MDIAEERSILENIFVDEYGEPSFKKCVNIMDLGTLKADKGVAVKET

>gene\_1919|GeneMark.hmm|132\_aa|-|3750|4148 >NVVL01000107.1 Rickettsiales  
bacterium isolate NORP64 Contig\_source1382A\_31424, whole genome shotgun sequence  
MKCNLIAQRISLQEFLEKADIVTEIESYTTNDEEAKKLETAPVMEIFMKWLEGFILN  
QPSEYFVDHPTDDADLVCNIQNELNFLISTLEIFGLPMGYMSGEGHFPNWGKDNKDDKLA  
AVRKRALASKMK

>gene\_1920|GeneMark.hmm|46\_aa|-|4197|4337 >NVVL01000107.1 Rickettsiales  
bacterium isolate NORP64 Contig\_source1382A\_31424, whole genome shotgun sequence  
MGLTSEVDVKLLHQCFELESYDNLLKPEFMDAVRKRRETLDERRT

>gene\_1921|GeneMark.hmm|62\_aa|-|4491|4679 >NVVL01000107.1 Rickettsiales  
bacterium isolate NORP64 Contig\_source1382A\_31424, whole genome shotgun sequence  
MRGDADEEDSWYCFEPLKDFFEELDCRNKEVLKNVRGIHYNSKVFFSSRLLGLPFVEVRQ  
AL

>gene\_1922|GeneMark.hmm|67\_aa|-|4842|5045 >NVVL01000107.1 Rickettsiales  
bacterium isolate NORP64 Contig\_source1382A\_31424, whole genome shotgun sequence  
VEIGKDDVYNRVYSYPKILKLIETAYLSISVLDQNGQVIAFAAFEDYPHGMKQGQYDEKHY  
NIWEDWF

>gene\_1923|GeneMark.hmm|42\_aa|-|5058|5186 >NVVL01000107.1 Rickettsiales  
bacterium isolate NORP64 Contig\_source1382A\_31424, whole genome shotgun sequence  
MEVNMNEGSPGSQNPGLAVYNEDNFDMESIVLRRADPDDCD

>gene\_1924|GeneMark.hmm|196\_aa|-|99|689 >NVVL01000108.1 Rickettsiales  
bacterium isolate NORP64 Contig\_source1382A\_31592, whole genome shotgun sequence  
MSGVDIIIGPMFSGKTELFETLNRQADIQHLGGLENKTLILHEDDVRKEQEKNRNAIS  
KNVITIRCTRLSDLNVENFNIIIGIDEGQFFPDINKVVRWMLTKRVIVASLCGDHKTTF  
GEVYKLPVCSSIKKLAICLPHIQRKGIFNVGAQCSFRLSFIHGKPKQLIGGYDKYMPV  
CIECYNEMKPGTLQSK

>gene\_1925|GeneMark.hmm|197\_aa|+|754|1347 >NVVL01000108.1 Rickettsiales  
bacterium isolate NORP64 Contig\_source1382A\_31592, whole genome shotgun sequence  
MSVFILRGVSPKNVRNNYDNHGYAKMQPPGKISNTKLWKAPKVLVLKND SRLTSFTTMTG  
SDKKIISLNNIESKCHNCGCECPDSELGIPIDIKRCKGGYIVLVIGKHCSYQCCFSDIIR  
ESNLPKSKRDNIYECSEQFIRIMFKKQHPGRELTKANNWKIMETVGTKIFSSGKLFIEI  
GNVSIVRCEKEYVMDT

>gene\_1926|GeneMark.hmm|126\_aa|+|1369|1749 >NVVL01000108.1 Rickettsiales  
bacterium isolate NORP64 Contig\_source1382A\_31592, whole genome shotgun sequence  
MYSYDILTICFVYTPAILLIFIYSYLKFKRINLSFVKSVIKSIEIRTLKSDIEIYDKYCV  
IKFYHNGSEQSVMLPYNRSLKYVGNAKDIYLYGNTDILVKHYGCIPFMVSAEDIGCDSI  
EYVDPF

>gene\_1927|GeneMark.hmm|209\_aa|+|1839|2468 >NVVL01000108.1 Rickettsiales  
bacterium isolate NORP64 Contig\_source1382A\_31592, whole genome shotgun sequence  
MNTHLGIDFAASVLAQSSINGILETQGKLSTLYGPNYLNLDLDEMNRWEERQKQKQKAD  
EFGSAYHEEEKPNRRRNISKYTKNVRNGVHIAERGDPIQIVGNSKESLLLYGLVDSEITI  
IGKTNNIVMSKENVVISLETSLTGKIFKCKNRLNIESIKYLGISTSNKIIVNGGVAA  
NSMITLYTSDKCKVNGSNIPLDMFDVVTL

>gene\_1928|GeneMark.hmm|416\_aa|-|2505|3755 >NVVL01000108.1 Rickettsiales  
bacterium isolate NORP64 Contig\_source1382A\_31592, whole genome shotgun sequence  
MKMVTQLLFFHIKKNLIRMCEIVKASVLIGAALRAVDNDDIKLLNKIIEVISPELSDVV  
TSDEMYITLISRAKEHNRKHTTIYLIGKWEELYPNSDKFSLYASLYINYRVPVSLIKYLS  
SFYATYTFNEIVSDLIHQNDNQNTLLACIKALEVYGEQSYEIKRLVDKSSNSNIYNFM

VDKLKEVSHYAKTPPWINNSFDQIPNVMDLVDRVPNESFILPSDKEISLIYPGVDVELL  
PRRSKILKEISMMSDKEKAELVKPEMDIRESKRQLDVELGRILGPSNVSEELTTSSVY  
GGSRMFLCETYDYDEEDDRVYDWFTGSCEICFSKIKYKWAYVRMPNKGKLGWEGQYCSW  
NCCRKDIVGEDIVTYAMIAVYEKYINKIGIQERLPDKDPSIVWASGDGIIVDEYTF

>gene\_1929|GeneMark.hmm|122\_aa|-|3718|4086 >NVVL01000108.1 Rickettsiales  
bacterium isolate NORP64 Contig\_source1382A\_31592, whole genome shotgun sequence  
MLQNIYNLSGGINSQYIFTITLAAIVIGWILVSLWTRVLENVAFGSFGYDSKSSLDSMIV  
SLAVTVIFVAFVWMVDEYGVVGESEVISSDRLKSTVDNLSKVHTDHMSKNENGNPIIIF  
PH

>gene\_1930|GeneMark.hmm|323\_aa|+|4147|5118 >NVVL01000108.1 Rickettsiales  
bacterium isolate NORP64 Contig\_source1382A\_31592, whole genome shotgun sequence  
MSLPENIKNFSLYPLNDEDKVRDYDYQKQLSSFWTSDEIDFTSDADDFLGLDEDIKTLVK  
NVLSFFTVIDGIVIDGIFKTLIGSVSLADMMFYTAQLNIESVHVVVYAKALRDIIPKDL  
GDAILSNLDTMESIKRKTDWIDAHVSSGASREHMLVVFSCVEGIFLMSPIMMIYRLASLG  
IFKGLSFANEQJISKDEQLHSEYAEYNYSVSKKIPDEDEVIKIVSECVELELLTSDILPKT  
SGVFHPKDFVDFIKHLGNIKLKGHGIDPIWDVEVENLASWVGVSVMTRKSNFHETKVGNY  
STFSLKDDKPNVDVNVGYMLRDF

>gene\_1931|GeneMark.hmm|68\_aa|-|69|275 >NVVL01000109.1 Rickettsiales  
bacterium isolate NORP64 Contig\_source1382A\_31865, whole genome shotgun sequence  
MATNNSFKITSKGQVTIPHNIREKLHLSTGSKIEFIIQDDAVLMIPINNKLSNLYGILPK  
PKKLRPQA

>gene\_1932|GeneMark.hmm|335\_aa|-|465|1472 >NVVL01000109.1 Rickettsiales  
bacterium isolate NORP64 Contig\_source1382A\_31865, whole genome shotgun sequence  
MITQSANQSTQPKIWWLVDSRVGNANQAIELAEKLDSEFEIKHIKYNHFALPNSLLALF  
PIHVKRRTLKLLKKEIPDIISSGRRTAALAIHLKLSKGSAKIIQIMRPFDFPKEFAL  
IILPQHDNFNYTLPNVVRIIGALTNIEKEIAKSQEDFETNYPAAKDFIAVLIGGSTKKNYK  
LTLENAKTLGDGILTISEHLLPVFISFSRRTPENVKKYFRDKFSWPNIIDPSEGGANP  
YPAILGKAEYIITTTDSISMCSAASTGKPVYVFTPANFKLKKHKFFFTQQLIDIGNVRRLL  
ETTTTYLDKFDYEPLEINKIAKIIKERFLSDDGE

>gene\_1933|GeneMark.hmm|140\_aa|+|1795|2217 >NVVL01000109.1 Rickettsiales  
bacterium isolate NORP64 Contig\_source1382A\_31865, whole genome shotgun sequence  
LSLISLRNQKEFDLVKNGRSEHSGRNLILLATKCDLIKSDKENPVFFGMKVSRRLLSKKA  
VIRNKVRRRIRHLVQNVKNPKVDTDQAAFIVIPKKGFDKTKFAQLNYDFRRTFSRALRD  
RNAAESESGSKASKSESAD

>gene\_1934|GeneMark.hmm|203\_aa|+|2601|3212 >NVVL01000109.1 Rickettsiales  
bacterium isolate NORP64 Contig\_source1382A\_31865, whole genome shotgun sequence  
MSTKLNELKRHLHPGRVYRRADLAKWSSAVDRHVAQLLEDGVLTKLSAGIYHYPKKTTFG  
AAPAEDDKLVA AFLKDHFRLLTSPNLYNALGLGTTQLYNEIVVYNHKRHGRFTLGGRTFD  
FRMKPHFPKTVTQEFLLVDLVNLDRLAENTDKLLKRVANKALELDSNKLLRMARDYGSV  
KARKFFKEVLSGGVASEKRRCQV

>gene\_1935|GeneMark.hmm|113\_aa|+|3321|3662 >NVVL01000109.1 Rickettsiales  
bacterium isolate NORP64 Contig\_source1382A\_31865, whole genome shotgun sequence  
MSRTVTLPVKKAMWKLKGDINNARRRRVTMELMAERAGISRITLAKIEKGQSSVSIG  
AYASALFVLGMTSRLENLADSEHDLVGRELEENLPKRIRLPRSSRGKHNEEP

>gene\_1936|GeneMark.hmm|411\_aa|+|3662|4897 >NVVL01000109.1 Rickettsiales  
bacterium isolate NORP64 Contig\_source1382A\_31865, whole genome shotgun sequence  
MSSNKIYVSLQLEKETCFVGLTWCHRRGARQSSSEYFNPDWLSHPEKFALDPALQLTKGV  
FHTKSDHVLFGAIGDSAPDRWGRVLMRRAEVARAKELGEAPRSLSEIDYLLGVNDEARQG  
ALQFSLGADGGYLAPKDKNTIPPLVNLPRLLSATERYLNDDETAEDLKILLAPGSSLGGA  
RPKASIRDQDGHLLAKFSKKDDEFNVVVWEAVALTLAEKAGIKTAEWRLAQIIGKAVLI  
TRRFDRQGGRRIPFLSAMSMLGAKDNEAHSYLEIAYALAQHGGAPNQDMEELWRRIVFTV  
LISNTDDHLRNHGFLYEQKNGWRLSPAYDINPVPLEVKARILSTSINFDPNTASLDVALS  
VIDDFRIKKPRALEIIEVDSAVKSWRSVAKQFGLSQKEIQRMESAFRRGD

>gene\_1937|GeneMark.hmm|52\_aa|-|2|157 >NVVL01000110.1 Rickettsiales  
bacterium isolate NORP64 Contig\_source1382A\_32065, whole genome shotgun sequence  
MNKYVLLLIIMQNSIIAKQLPTNKKVSNITPVSYFVDHVRQLHQLKEN

>gene\_1938|GeneMark.hmm|592\_aa|-|367|2145 >NVVL01000110.1 Rickettsiales  
bacterium isolate NORP64 Contig\_source1382A\_32065, whole genome shotgun sequence  
MANTTTNPDFVAAPQHSSARELTQEEFLSKTKFAEPGNIIPSFWYHKIIDEKGRADITA  
ITLLSEIFALYRFSSSNPCAFISNPSCSSPTLVGRALRVPEYEHFVKRFCISKEKARRAF  
IKLEELCLITRDVCNIALKKGGRQNFLLLDHEFFKSCFRDPKQDVRVRMDAEHRINKA  
DNTEFAEGDKYTTINLAKEINEGVTEDNSNSKLNFRKNDQIEEGIYAEERLDGDKSPSIQ  
ICNHHIKKKNIKNRSMKSNFKINDLKEKEKELEIEEILEPTKSNIPPEEAGKEEVIRKKE  
RKRWEKKTLDYYPLTEEDCKILQKESGREFNLNAMNEILLDISGKMKSVSFWSKKGFMS  
YMSKIYSYEKRNEMLINNASFRIRTNMTKEEAKCQLIEQYLGKIESRTEVTPEMTLQRKL  
AVLLKPETAYEFLRAYSSGVLQGEKYVMYLRKHVELMEIEKEVITSQVQVYGRLRVSED  
CFFGTISGVEIKMPKKQTSKLPRASTGEEKKPELFGKIWGKVRRLIECLGEDNDRNW  
FSNMCKVDEAKKELTVITSSDFYKDWANRNFLPELKQVSKDCGFELVGIS

>gene\_1939|GeneMark.hmm|85\_aa|-|2375|2632 >NVVL01000110.1 Rickettsiales  
bacterium isolate NORP64 Contig\_source1382A\_32065, whole genome shotgun sequence  
MCYINYIKEVIMSKSVVLSFAVPLELSIQMNVYMETKGLNRSQLIKAALRLFLEIQKKK  
EDIPVKLEEIHQELLNIKKIVSKKA

>gene\_1940|GeneMark.hmm|220\_aa|+|3200|3862 >NVVL01000110.1 Rickettsiales  
bacterium isolate NORP64 Contig\_source1382A\_32065, whole genome shotgun sequence  
MKKTKVLTIANRKGAGKSTCAAHLSIEAAKNGLKTLIDLPQKTLETWWKKREEENPF  
LTDINPKKIEEVIASLNEYDFDLCIIDTPGDTSVNASAGLKVADLVLIPTKPTAPDLQAI  
GRTIASIKKLEKEYIFVVTQIVLRTKLALQATAVLSEFGVVAPSSFVNRVAYANAMSVGD  
SATAEDKGAKKEEVELLWKFISSKLFDKGEKNAKEKVRLLNI

>gene\_1941|GeneMark.hmm|90\_aa|+|3831|4103 >NVVL01000110.1 Rickettsiales  
bacterium isolate NORP64 Contig\_source1382A\_32065, whole genome shotgun sequence  
MPKKKFDLTSDIINVLDGEANAEESLPAVLSQSRHRQQEVEAKNKNVLLTFSVEEAFRK  
EYKIWCARKGLKMNEAFIKGFELLKQVDYT

>gene\_1942|GeneMark.hmm|169\_aa|+|4503|5009 >NVVL01000110.1 Rickettsiales  
bacterium isolate NORP64 Contig\_source1382A\_32065, whole genome shotgun sequence  
MPPEVETLKCYLGHIIGETIASLETRRDKLRYELSPYLEQHAVLGVVSGIKRKAKFL  
IIELSNGYMLIFHLGMSGRLTMQSVYDYPQKHDHIIISFQSGDQLVFNDAARRFGMVYSCR  
ADMLSEQSFLNRAGREPLEEGFDACYLLKQLAAKKSPIKTAIMDNKIVV

>gene\_1943|GeneMark.hmm|262\_aa|+|305|1093 >NVVL01000111.1 Rickettsiales  
bacterium isolate NORP64 Contig\_source1382A\_32090, whole genome shotgun sequence  
MTLKCGLAIRWLKACADILIKNYNQGGYMAKTEAKQVTLSSAKYYNILTFIFVFCLLIS  
NIAEMKIINIFNIAQIGAGTLFFPLLYVLNDVITEIYGFSAARRMIFLALIFNMSFSLLM  
YLIIFLPEGADWQEKEAFNTIFALSPRIMLGSLLSYFIGELVNSAIIISNLKQFRGKFFA  
IRATFSTLVSSFLESILFVLIAFYGRMPDQELIKMILMLTIKVMYEILVMPATLALISF  
LKETEKL DVYEKPLFKNIFPKW

>gene\_1944|GeneMark.hmm|247\_aa|-|1144|1887 >NVVL01000111.1 Rickettsiales  
bacterium isolate NORP64 Contig\_source1382A\_32090, whole genome shotgun sequence  
MNLKILAFDVSNNSCSVAISLDQEILAFEQELEPSMQAERLMVLIESVLKKARLQYQDIDY  
LAVTTGPGSFTGIRIGIAAARGIIFASNGIASNIKIGITNFEASYRACEQVKDHDSAL  
IMLNAYRGQLYVQEFAGGVPSAEARIIDDSELKSLQNRSGVTICAGSGLAKSYAEIKEL  
DDFITSDLIILPRFPVIRALHIARLAGQKIKRGEITPIAPLYIRKPDIIIPKPF AEILAK  
KRSRSGG

>gene\_1945|GeneMark.hmm|289\_aa|+|1947|2816 >NVVL01000111.1 Rickettsiales  
bacterium isolate NORP64 Contig\_source1382A\_32090, whole genome shotgun sequence  
MKIISGMSNPQLAARIAKEIGAELDTKTDNFSDGELRVQVHGDMGNDVIIVQSTSTPVN  
NHLMELLLLADTTKRAGAQNITAIVPYFGYSRQDRCTYKHGPISASLVIKMIESAGVTKL  
ITLDLHSSQLEGMFNIPIINLATESIFFSAIENRENSIVSPDIGGIARARNYSSLFGVD  
LAIINKSRPNPNCSMNGIIGDVSGKNCIIDDIIIDGASTLCLATELLAAGALSVEAII  
THAVLSGDAVSKVENSGIKQIYISDSICHNRLPPKFVTMPIHQLIGVVL

>gene\_1946|GeneMark.hmm|274\_aa|-|2956|3780 >NVVL01000111.1 Rickettsiales  
bacterium isolate NORP64 Contig\_source1382A\_32090, whole genome shotgun sequence  
MIQKLFNFILVAIFVSLIALFVYKSMYKPEILSVSLDGTKIEKNSGASSTGAQGRSKSEL  
NAIKEYIINHPELILKSLEGMQKKKILELTKKSTEYLKANNSAIENADSPPVIGNLEGD  
ISIVVFYDYNCSFCQKANIHTNLIESDAGIKVILRPIPIILGGSSMYVAKVMLAVQRISP  
AKFLAIHNDLMKMKLINKDSVKSLISKYEIDYSLVDNEVNSYSIRQQINKNF EFAKGLGI  
KGAPSHVINGKFIPGMLTLDKLSIVKH IRAAKK

>gene\_1947|GeneMark.hmm|367\_aa|-|3899|5002 >NVVL01000111.1 Rickettsiales  
bacterium isolate NORP64 Contig\_source1382A\_32090, whole genome shotgun sequence  
GNKIFINTGLIINHPDPDILRGIIAHEIGHILGRHVVRNQEIENYQKASIGATALGLVA



AMSGSADAGMAVVLGGSHFARRSIYAYSRTFESSADQTAIRLLEKSSHVIGLIKFFEQV  
RKLQATGIDNPYESTHPLSNDRVTILKSFNKRSKFQLSQNHDDIVHKYQRSSAKLAAFTL  
EIDNIFKHSYVTQTKDITTYMNAIKSFRMGSFDDSLNYINQLIIKHPDDPYYHELKGQLY  
FEAGKGDALVEYKIAIETRPDDELILLGKAIVGITKHIDRPGYLEQFHKDLERVLQKNPD  
SVLALHYNAIYYNKMGMVGEGLSAALIALKSGRIADARKMASAAKNALAKKSVDWYRAG  
DILAATE
