# Supplementary material for: Deciphering viral presences: two novel partial giant viruses detected in marine metagenome and in a mine drainage metagenome
Source: Springer Nature journal article supplement (doi:10.1186/s12985-018-0976-9), 2018-04-10
Supplement: MOESM5 [file 15604840]

## Marine metagenome NVVL00000000.1:

List of 15 contigs identified as virus (Misidentifiedvirus):

- NVVL01000008.1 Rickettsiales bacterium isolate NORP64 Contig\_source1382A\_2665. GC content = 33,1 %.
- NVVL01000010.1 Rickettsiales bacterium isolate NORP64 Contig\_source1382A\_7217. GC content = 33,6 %.
- NVVL01000017.1 Rickettsiales bacterium isolate NORP64 Contig\_source1382A\_10295. GC content = 33,1 %.
- NVVL01000019.1 Rickettsiales bacterium isolate NORP64 Contig\_source1382A\_11027. GC content = 33,1 %.
- NVVL01000020.1 Rickettsiales bacterium isolate NORP64 Contig\_source1382A\_11070. GC content = 32,6 %.
- NVVL01000022.1 Rickettsiales bacterium isolate NORP64 Contig\_source1382A\_13955. GC content = 32,3 %.
- NVVL01000024.1 Rickettsiales bacterium isolate NORP64 Contig\_source1382A\_15885. GC content = 40,8 %.
- NVVL01000037.1 Rickettsiales bacterium isolate NORP64 Contig\_source1382A\_20496. GC content = 36,7 %.
- NVVL01000064.1 Rickettsiales bacterium isolate NORP64 Contig\_source1382A\_24651. GC content = 33,8 %.
- NVVL01000081.1 Rickettsiales bacterium isolate NORP64 Contig\_source1382A\_26629. GC content = 33,0 %.
- NVVL01000083.1 Rickettsiales bacterium isolate NORP64 Contig\_source1382A\_26682. GC content = 34,1%.
- NVVL01000092.1 Rickettsiales bacterium isolate NORP64 Contig\_source1382A\_29265. GC content = 34,2 %.
- NVVL01000097.1 Rickettsiales bacterium isolate NORP64 Contig\_source1382A\_29601. GC content = 34,1 %.
- NVVL01000108.1 Rickettsiales bacterium isolate NORP64 Contig\_source1382A\_31592. GC content = 33,1 %.

List of 11 contigs probable represent an undefined ciliate (*Stylonychia spp.*; *Sterkiella spp.* ; *Oxytricha spp.*) :

- NVVL01000013.1 Rickettsiales bacterium isolate NORP64 Contig\_source1382A\_8708. GC content = 36,7 %.
- NVVL01000044.1 Rickettsiales bacterium isolate NORP64 Contig\_source1382A\_23026. GC content =39,1%
- NVVL01000072.1 Rickettsiales bacterium isolate NORP64 Contig\_source1382A\_25088. GC content= 37,1%
- NVVL01000080.1 Rickettsiales bacterium isolate NORP64 Contig\_source1382A\_26406. GC content= 38,2%
- NVVL01000089.1 Rickettsiales bacterium isolate NORP64 Contig\_source1382A\_28651. GC content= 36,9%
- NVVL01000093.1 Rickettsiales bacterium isolate NORP64 Contig\_source1382A\_29274. GC content= 37,9%
- NVVL01000098.1 Rickettsiales bacterium isolate NORP64 Contig\_source1382A\_29766. GC content=38,5%
- NVVL01000101.1 Rickettsiales bacterium isolate NORP64 Contig\_source1382A\_29891. GC content= 32,2%
- NVVL01000102.1 Rickettsiales bacterium isolate NORP64 Contig\_source1382A\_30088. GC content= 38,3 %
- NVVL01000105.1 Rickettsiales bacterium isolate NORP64 Contig\_source1382A\_30565. GC content = 38,2 %
- NVVL01000107.1 Rickettsiales bacterium isolate NORP64 Contig\_source1382A\_31424. GC content=37,1%
