# Supplementary material for: Deciphering viral presences: two novel partial giant viruses detected in marine metagenome and in a mine drainage metagenome
Source: Springer Nature journal article supplement (doi:10.1186/s12985-018-0976-9), 2018-04-10
Supplement: MOESM7 [file 15604840]

## Phylogenetic trees based on the VETF, mRNA and DNA topoisomerase II proteins.

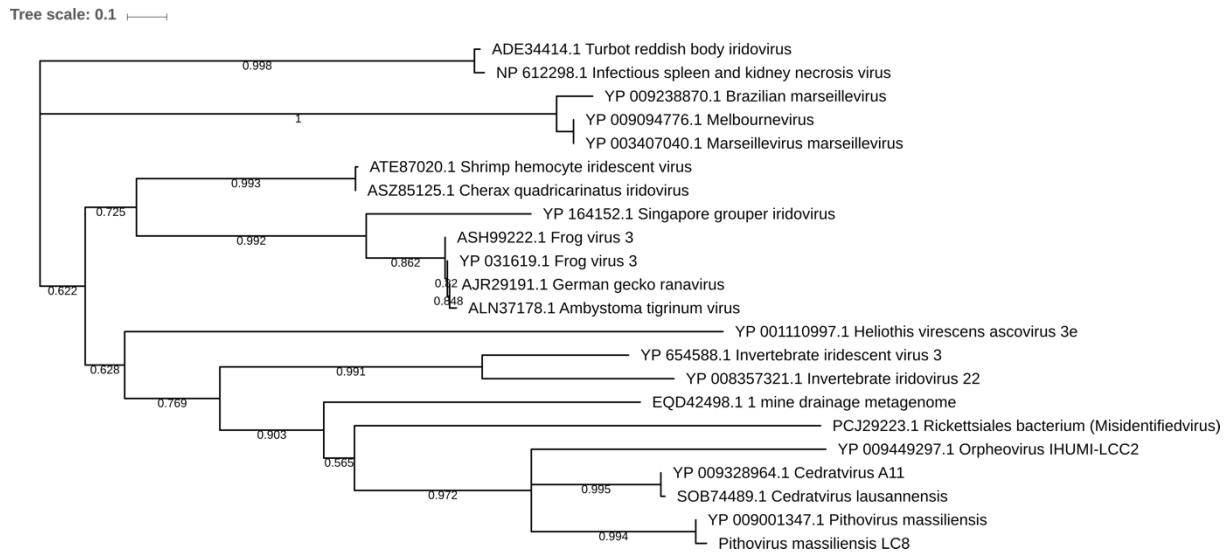

**Figure S1: Phylogenetic tree based on the Very Early Transcription Factor protein.**

Maximum-likelihood tree based on 454 positions. We deleted branches with a bootstrap value inferior at 0.5. Muscle program was used with standard parameter. The tree was built using FastTree program with JTT model.

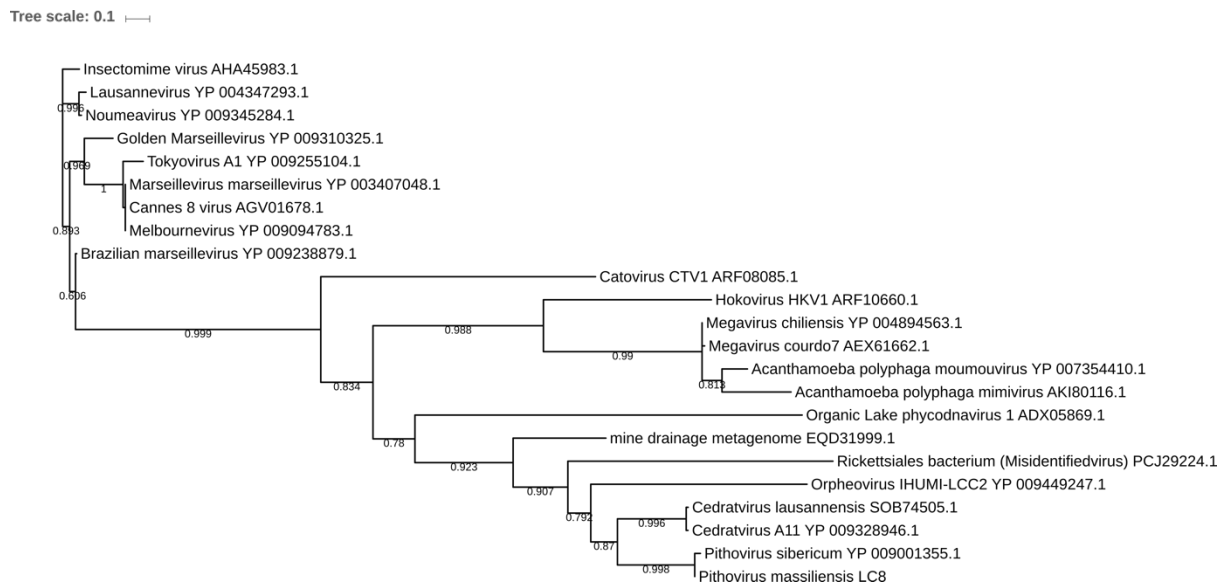

**Figure S2: Phylogenetic tree based on the mRNA capping enzyme protein.**

Maximum-likelihood tree based on 507 positions. We deleted branches with a bootstrap value inferior at 0.5. Muscle program was used with standard parameter. The tree was built using FastTree program with JTT model.

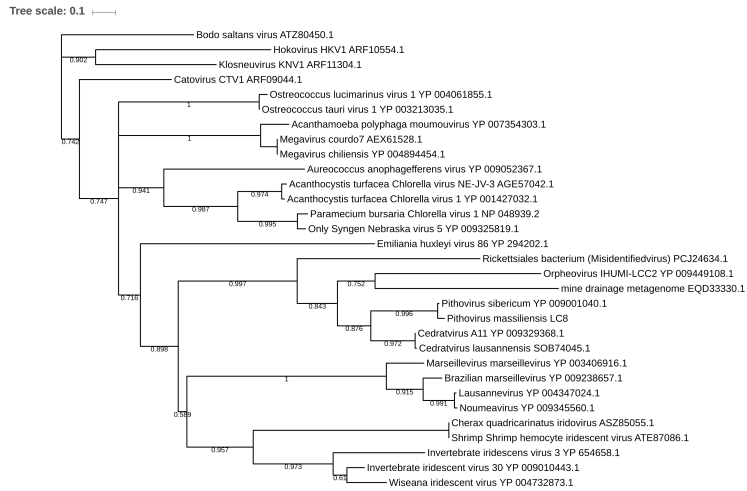

**Figure S3: Phylogenetic tree based on the DNA topoisomerase IIA protein.**

Maximum likelihood tree based on 280 positions. We deleted branches with a bootstrap value inferior at 0.5. Muscle program was used with standard parameter. The tree was built using FastTree program with JTT model.
